# Supplementary material for: Chaperone-Mediated Autophagy Controls Proteomic and Transcriptomic Pathways to Maintain Glioma Stem Cell Activity
Source: Oxford University Press journal article supplement (doi:10.1158/0008-5472.can-21-2161), 2022-02-07
Supplement: can-21-2161_suppl_table_1_suppst1.xlsx [file can-21-2161_suppl_table_1_suppst1.xlsx]

## Sheet: Proteomics pGK shL2A GNS166
						Raw data (LFQ intensity)
	Uniprot ID	Name of the protein	Unique peptides	p value	Sh/Ctrl	pGK-1	shL2A-1	pGK-2	shL2A-2	pGK-3	shL2A-3	pGK-4	shL2A-4
	OAS2_HUMAN	2-5-oligoadenylate synthase 2 OS=Homo sapiens GN=OAS2 PE=1 SV=3	10	6.78656e-05	11.814	14.4392	17.822	14.0163	17.3998	14.341	17.9791	14.2198	18.065
	MX2_HUMAN	Interferon-induced GTP-binding protein Mx2 OS=Homo sapiens GN=MX2 PE=1 SV=1	8	0.00772449	11.5827	13.6276	16.9592	14.2993	17.1931	14.1259	16.8868	12.3691	17.5184
	OASL_HUMAN	2-5-oligoadenylate synthase-like protein OS=Homo sapiens GN=OASL PE=1 SV=2	4	0.00130356	4.95025	13.2537	15.9198	13.5509	16.046	13.616	15.9194	13.7697	15.535
	GAG_HV196	Gag polyprotein OS=Human immunodeficiency virus type 1 group M subtype K (isolate 96CM-MP535) GN=gag PE=3 SV=2;sp	1	0.00571071	4.42611	14.3212	16.4864	14.2327	15.8556	14.8223	16.6328	14.1242	17.1097
	OAS1_HUMAN	2-5-oligoadenylate synthase 1 OS=Homo sapiens GN=OAS1 PE=1 SV=4	10	0.00689731	3.79853	16.372	17.9802	15.7155	18.2391	16.3384	18.6257	17.0435	18.3261
	WDR46_HUMAN	WD repeat-containing protein 46 OS=Homo sapiens GN=WDR46 PE=1 SV=3	2	0.0245138	3.77182	12.9874	14.1039	11.4863	14.4345	13.0987	14.2828	12.1254	14.5376
	POL_HV1B1	Gag-Pol polyprotein OS=Human immunodeficiency virus type 1 group M subtype B (isolate BH10) GN=gag-pol PE=1 SV=3;sp	0	0.00246939	3.73677	16.6738	18.6335	16.6535	18.7879	17.0012	18.3214	16.7341	18.927
	ISG15_HUMAN	Ubiquitin-like protein ISG15 OS=Homo sapiens GN=ISG15 PE=1 SV=5	7	0.00196585	3.22511	16.8194	18.2847	16.678	18.2421	16.4894	18.0391	16.0371	18.2153
	MX1_HUMAN	Interferon-induced GTP-binding protein Mx1 OS=Homo sapiens GN=MX1 PE=1 SV=4	17	0.0135575	3.15949	17.5826	19.6506	18.3353	19.064	18.392	20.1796	18.0117	20.0661
	PML_HUMAN	Protein PML OS=Homo sapiens GN=PML PE=1 SV=3	11	0.0171479	2.90635	16.1998	16.9815	15.744	17.525	16.8778	18.1925	15.5321	17.8115
	HACL1_HUMAN	2-hydroxyacyl-CoA lyase 1 OS=Homo sapiens GN=HACL1 PE=1 SV=2	3	0.012471	2.55338	14.4079	16.2305	13.8653	15.2002	14.8752	15.5376	14.2749	15.8645
	ABCE1_HUMAN	ATP-binding cassette sub-family E member 1 OS=Homo sapiens GN=ABCE1 PE=1 SV=1	5	0.0497233	2.34652	16.2875	16.3708	14.8215	16.3839	15.382	16.9031	15.064	16.8193
	SYWC_HUMAN	Tryptophan--tRNA ligase, cytoplasmic OS=Homo sapiens GN=WARS PE=1 SV=2	5	0.0259525	2.33479	14.6144	16.2993	15.8141	16.1751	14.5331	16.0619	14.1133	15.4317		UPREGULATED SIGNIFICANTLY (P<0,05)
	STAT1_HUMAN	Signal transducer and activator of transcription 1-alpha/beta OS=Homo sapiens GN=STAT1 PE=1 SV=2	13	0.0039453	2.16702	17.0132	18.0698	17.1762	18.0317	16.8509	18.3564	16.9908	18.0361
	NAKD2_HUMAN	NAD kinase 2, mitochondrial OS=Homo sapiens GN=NADK2 PE=1 SV=2	3	0.00877445	2.11541	12.8562	13.9011	13.5975	14.7953	13.2767	14.7392	14.0114	14.6298		DOWNREGULATED SIGNIFICANTLY (P<0,05)
	NEXN_HUMAN	Nexilin OS=Homo sapiens GN=NEXN PE=1 SV=1	8	0.0330682	2.08842	15.4418	16.5091	15.4486	17.0278	15.5688	16.899	16.7385	17.0114
	BST2_HUMAN	Bone marrow stromal antigen 2 OS=Homo sapiens GN=BST2 PE=1 SV=1	2	0.0196789	2.05268	16.0419	16.7452	15.8092	16.4352	15.8028	17.3861	15.8783	17.1158		NON-SIGNIFICANT
	RPOM_HUMAN	DNA-directed RNA polymerase, mitochondrial OS=Homo sapiens GN=POLRMT PE=1 SV=2	8	0.0350695	2.01427	15.9267	16.37	15.1403	16.2156	16.1397	16.9218	15.1492	16.8895
	IF16_HUMAN	Gamma-interferon-inducible protein 16 OS=Homo sapiens GN=IFI16 PE=1 SV=3	18	0.0118995	1.97458	17.9012	18.3941	17.2675	18.3376	17.1277	18.1404	16.9324	18.2829
	ZC11A_HUMAN	Zinc finger CCCH domain-containing protein 11A OS=Homo sapiens GN=ZC3H11A PE=1 SV=3	3	0.0195632	1.93338	13.539	14.9185	14.2256	14.9594	14.8234	15.305	13.9496	15.1591
	CEBPZ_HUMAN	CCAAT/enhancer-binding protein zeta OS=Homo sapiens GN=CEBPZ PE=1 SV=3	10	0.0448497	1.89485	16.2578	17.0662	14.054	14.2521	15.2638	16.4736	14.9912	16.4632
	WDR3_HUMAN	WD repeat-containing protein 3 OS=Homo sapiens GN=WDR3 PE=1 SV=1	5	0.0226501	1.88716	15.6475	16.1306	15.0257	16.1361	15.8177	16.4778	15.1738	16.5852
	ANXA6_HUMAN	Annexin A6 OS=Homo sapiens GN=ANXA6 PE=1 SV=3	7	0.0290309	1.85538	14.6049	15.7155	14.9246	15.229	14.7513	16.1031	15.6319	16.432
	KIF22_HUMAN	Kinesin-like protein KIF22 OS=Homo sapiens GN=KIF22 PE=1 SV=5	2	0.0446365	1.84827	12.3135	13.8114	12.1167	13.2592	13.8782	14.4567	13.8623	14.1882
	NOP14_HUMAN	Nucleolar protein 14 OS=Homo sapiens GN=NOP14 PE=1 SV=3	2	0.0289534	1.84454	12.0589	13.3772	13.6934	14.2044	13.082	13.5662	13.4006	14.6202
	CCD86_HUMAN	Coiled-coil domain-containing protein 86 OS=Homo sapiens GN=CCDC86 PE=1 SV=1	2	0.0391489	1.84294	13.9186	14.3849	13.456	15.0582	14.1236	14.7558	14.0904	14.9178
	GPHRB_HUMAN	Golgi pH regulator B OS=Homo sapiens GN=GPR89B PE=1 SV=1;sp	4	0.0304916	1.8257	16.0776	16.4347	14.7014	15.7661	15.1753	16.5577	15.4213	16.0909
	MAK16_HUMAN	Protein MAK16 homolog OS=Homo sapiens GN=MAK16 PE=1 SV=2	3	0.0402189	1.77843	13.3163	14.3769	13.289	13.4454	12.8782	14.1305	13.3239	14.177
	MECP2_HUMAN	Methyl-CpG-binding protein 2 OS=Homo sapiens GN=MECP2 PE=1 SV=1	6	0.04581	1.76681	16.6168	16.954	15.6887	17.1656	16.6148	17.1697	16.6016	17.5173
	PRAF2_HUMAN	PRA1 family protein 2 OS=Homo sapiens GN=PRAF2 PE=1 SV=1	5	0.0303739	1.75255	19.1071	19.2913	18.4178	19.4095	18.8726	19.886	18.733	19.7815
	TAP1_HUMAN	Antigen peptide transporter 1 OS=Homo sapiens GN=TAP1 PE=1 SV=2	16	0.0298889	1.7335	18.9091	19.1827	18.4149	19.4948	19.0007	19.6697	18.6607	19.813
	5NT3A_HUMAN	Cytosolic 5-nucleotidase 3A OS=Homo sapiens GN=NT5C3A PE=1 SV=3	8	0.034022	1.71805	16.3989	16.7159	16.4112	17.205	16.3049	16.9838	15.5834	16.917
	GSTP1_HUMAN	Glutathione S-transferase P OS=Homo sapiens GN=GSTP1 PE=1 SV=2	5	0.00229398	1.66101	16.47	17.4153	17.4696	18.1956	16.7987	17.4081	16.6125	17.26
	SQRD_HUMAN	Sulfide:quinone oxidoreductase, mitochondrial OS=Homo sapiens GN=SQRDL PE=1 SV=1	7	0.00410847	1.6539	16.0873	17.0252	16.8695	17.3723	16.9356	17.6195	16.8902	17.6692
	PNPT1_HUMAN	Polyribonucleotide nucleotidyltransferase 1, mitochondrial OS=Homo sapiens GN=PNPT1 PE=1 SV=2	22	0.00464826	1.61509	18.7608	19.4315	19.0077	19.5216	18.6963	19.3348	18.4619	19.4053
	UTP20_HUMAN	Small subunit processome component 20 homolog OS=Homo sapiens GN=UTP20 PE=1 SV=3	7	0.0453848	1.61198	14.2845	15.2827	15.8845	16.3303	16.0276	16.2575	15.7635	16.845
	RDH14_HUMAN	Retinol dehydrogenase 14 OS=Homo sapiens GN=RDH14 PE=1 SV=1	5	0.0457151	1.57001	15.5789	16.2102	15.4942	16.4198	15.6662	16.6124	16.34	16.4401
	TCTP_HUMAN	Translationally-controlled tumor protein OS=Homo sapiens GN=TPT1 PE=1 SV=1	3	0.0125369	1.55643	14.7429	15.6129	15.4595	15.9368	15.1256	15.9363	15.6484	16.0434
	1B44_HUMAN	HLA class I histocompatibility antigen, B-44 alpha chain OS=Homo sapiens GN=HLA-B PE=1 SV=1	2	0.0247252	1.53414	19.5015	19.7195	19.1662	19.9499	19.4713	20.3565	19.5893	20.1722
	DJC11_HUMAN	DnaJ homolog subfamily C member 11 OS=Homo sapiens GN=DNAJC11 PE=1 SV=2	12	0.0290068	1.52592	18.8071	19.2286	17.8297	18.1767	18.329	18.9636	18.2269	19.2624
	IF4G1_HUMAN	Eukaryotic translation initiation factor 4 gamma 1 OS=Homo sapiens GN=EIF4G1 PE=1 SV=4	18	0.000999056	1.5196	17.772	18.5009	17.7519	18.3679	17.9191	18.4329	18.1613	18.7174
	TOIP1_HUMAN	Torsin-1A-interacting protein 1 OS=Homo sapiens GN=TOR1AIP1 PE=1 SV=2	15	0.0166644	1.51221	18.2302	18.545	18.4344	18.9014	18.1028	18.9112	18.2977	19.0943
	USE1_HUMAN	Vesicle transport protein USE1 OS=Homo sapiens GN=USE1 PE=1 SV=2	3	0.0151862	1.50043	14.3796	14.744	14.1839	14.7763	14.4833	14.9624	14.4748	15.3806
	ELYS_HUMAN	Protein ELYS OS=Homo sapiens GN=AHCTF1 PE=1 SV=3	13	0.0477683	1.49261	17.1561	17.2076	16.599	17.378	17.1096	17.7765	16.5103	17.3243
	GOSR1_HUMAN	Golgi SNAP receptor complex member 1 OS=Homo sapiens GN=GOSR1 PE=1 SV=1	5	0.0337668	1.47822	16.4707	16.8771	16.0486	16.931	16.4982	16.7205	16.0822	16.8265
	4F2_HUMAN	4F2 cell-surface antigen heavy chain OS=Homo sapiens GN=SLC3A2 PE=1 SV=3	24	0.0133524	1.46528	21.2525	21.8972	21.1283	21.7946	21.4065	21.6439	21.3744	22.0308
	RRS1_HUMAN	Ribosome biogenesis regulatory protein homolog OS=Homo sapiens GN=RRS1 PE=1 SV=2	5	0.0204654	1.45702	17.9195	18.3851	17.0656	17.5522	17.7323	18.0625	17.4396	18.3292
	OLA1_HUMAN	Obg-like ATPase 1 OS=Homo sapiens GN=OLA1 PE=1 SV=2	5	0.0147846	1.43675	15.959	16.372	15.518	15.8196	15.2995	16.0641	16.2074	16.8195
	ODB2_HUMAN	Lipoamide acyltransferase component of branched-chain alpha-keto acid dehydrogenase complex, mitochondrial OS=Homo sapiens GN=DBT PE=1 SV=3	5	0.00547394	1.43312	16.3206	16.9459	16.7289	17.0361	16.5477	17.1101	16.4132	16.995
	THOC4_HUMAN	THO complex subunit 4 OS=Homo sapiens GN=ALYREF PE=1 SV=3	12	0.0488821	1.43211	20.2763	20.5775	19.9787	20.9368	20.4594	20.7131	20.2196	20.7791
	TFAM_HUMAN	Transcription factor A, mitochondrial OS=Homo sapiens GN=TFAM PE=1 SV=1	12	0.0490603	1.41829	18.6319	19.2325	18.1728	19.0038	18.8236	18.9031	18.5304	19.0358
	MCM3_HUMAN	DNA replication licensing factor MCM3 OS=Homo sapiens GN=MCM3 PE=1 SV=3	14	0.0310099	1.41505	18.0828	18.2139	18.0702	18.5901	17.6412	18.2685	17.7521	18.4773
	S12A2_HUMAN	Solute carrier family 12 member 2 OS=Homo sapiens GN=SLC12A2 PE=1 SV=1	19	0.0280311	1.41056	18.4883	19.0509	18.4296	19.0971	18.5743	18.7039	18.2955	18.9209
	S26A6_HUMAN	Solute carrier family 26 member 6 OS=Homo sapiens GN=SLC26A6 PE=1 SV=1	3	0.00350752	1.39479	14.7466	15.0928	14.8755	15.3492	15.1025	15.5778	14.8573	15.4822
	ITPR1_HUMAN	Inositol 1,4,5-trisphosphate receptor type 1 OS=Homo sapiens GN=ITPR1 PE=1 SV=3	3	0.0450661	1.3747	13.7273	14.3542	13.3011	14.0609	13.6319	13.8325	14.2387	14.4878
	MCCA_HUMAN	Methylcrotonoyl-CoA carboxylase subunit alpha, mitochondrial OS=Homo sapiens GN=MCCC1 PE=1 SV=3	12	0.0234633	1.37322	17.5017	17.8441	18.0249	18.4122	17.8166	18.1411	17.5579	18.3339
	MAP4_HUMAN	Microtubule-associated protein 4 OS=Homo sapiens GN=MAP4 PE=1 SV=3	19	0.0298855	1.37195	18.6326	18.8197	18.3641	18.9383	18.4476	19.1615	18.7898	19.1396
	CGAS_HUMAN	Cyclic GMP-AMP synthase OS=Homo sapiens GN=MB21D1 PE=1 SV=2	10	0.0053374	1.36724	17.1476	17.7584	16.5597	16.9062	17.4983	17.8587	17.0281	17.5155
	HNRPQ_HUMAN	Heterogeneous nuclear ribonucleoprotein Q OS=Homo sapiens GN=SYNCRIP PE=1 SV=2	26	0.0157109	1.36545	21.7477	22.0087	21.2899	21.9717	21.7252	22.0896	21.7054	22.1957
	TPM1_HUMAN	Tropomyosin alpha-1 chain OS=Homo sapiens GN=TPM1 PE=1 SV=2	7	0.0444867	1.36539	18.9317	19.2682	19.0214	19.8625	19.0751	19.3062	19.2744	19.6628
	RMD1_HUMAN	Regulator of microtubule dynamics protein 1 OS=Homo sapiens GN=RMDN1 PE=1 SV=1	6	0.0195812	1.36535	17.2216	17.5302	17.4068	18.0536	17.1009	17.3556	17.6457	18.2327
	AT2A2_HUMAN	Sarcoplasmic/endoplasmic reticulum calcium ATPase 2 OS=Homo sapiens GN=ATP2A2 PE=1 SV=1	40	0.00663636	1.36126	21.0759	21.3273	20.7812	21.2747	21.2096	21.6974	21.0087	21.5559
	ARF5_HUMAN	ADP-ribosylation factor 5 OS=Homo sapiens GN=ARF5 PE=1 SV=2	3	0.0392211	1.34831	14.5677	14.8179	15.8356	16.082	15.0965	15.8645	15.4935	15.9536
	NUP93_HUMAN	Nuclear pore complex protein Nup93 OS=Homo sapiens GN=NUP93 PE=1 SV=2	23	0.0177975	1.32329	21.0459	21.4247	20.8942	21.3085	21.0385	21.2424	20.889	21.5085
	FGF2_PANTR	Fibroblast growth factor 2 OS=Pan troglodytes GN=FGF2 PE=2 SV=2;sp	3	0.00462914	1.32088	15.1447	15.6726	15.2411	15.686	15.4448	15.7801	15.319	15.6168
	HS71B_HUMAN	Heat shock 70 kDa protein 1B OS=Homo sapiens GN=HSPA1B PE=1 SV=1;sp	20	0.00214575	1.31483	20.9396	21.359	20.8722	21.152	20.8678	21.2874	20.8648	21.3256
	YIF1A_HUMAN	Protein YIF1A OS=Homo sapiens GN=YIF1A PE=1 SV=2	4	0.0226324	1.30195	15.7671	16.1507	15.6344	15.9336	15.9556	16.1721	15.7109	16.3343
	MDHC_HUMAN	Malate dehydrogenase, cytoplasmic OS=Homo sapiens GN=MDH1 PE=1 SV=4	8	0.0041483	1.29953	17.6022	18.0244	17.7737	18.0139	17.5833	18.0381	17.5123	17.907
	LDHB_HUMAN	L-lactate dehydrogenase B chain OS=Homo sapiens GN=LDHB PE=1 SV=2	17	0.0288636	1.29847	20.6244	20.7157	20.4115	20.8706	20.3013	20.776	20.3032	20.7853
	RRAS2_HUMAN	Ras-related protein R-Ras2 OS=Homo sapiens GN=RRAS2 PE=1 SV=1	5	0.0406191	1.29282	16.8879	17.1627	16.6526	17.2752	16.8692	16.9993	16.9796	17.434
	ACTS_HUMAN	Actin, alpha skeletal muscle OS=Homo sapiens GN=ACTA1 PE=1 SV=1;sp	4	0.0131689	1.28503	22.9952	23.2737	23.0501	23.3782	23.2194	23.4962	22.8383	23.4021
	IVD_HUMAN	Isovaleryl-CoA dehydrogenase, mitochondrial OS=Homo sapiens GN=IVD PE=1 SV=1	6	0.0494732	1.28073	16.0358	16.3589	16.9047	16.9961	16.2838	16.9194	16.7539	17.1317
	ATPB_HUMAN	ATP synthase subunit beta, mitochondrial OS=Homo sapiens GN=ATP5B PE=1 SV=3	29	0.00849983	1.27244	24.0805	24.4772	24.3009	24.7572	24.3143	24.5082	24.106	24.4495
	MGN2_HUMAN	Protein mago nashi homolog 2 OS=Homo sapiens GN=MAGOHB PE=1 SV=1;sp	10	0.0460553	1.27146	18.7827	18.9866	18.7047	19.1738	18.8611	18.9968	18.5615	19.1388
	YTHD2_HUMAN	YTH domain-containing family protein 2 OS=Homo sapiens GN=YTHDF2 PE=1 SV=2	2	0.0427514	1.26536	14.9369	15.2042	15.1488	15.3638	14.7116	15.3498	15.1059	15.3436
	SEH1_HUMAN	Nucleoporin SEH1 OS=Homo sapiens GN=SEH1L PE=1 SV=3	5	0.0418408	1.26017	16.6055	16.9779	16.9863	17.2718	16.9246	17.028	16.9326	17.5057
	PIGS_HUMAN	GPI transamidase component PIG-S OS=Homo sapiens GN=PIGS PE=1 SV=3	14	0.0220191	1.24293	18.046	18.2541	18.2151	18.6885	18.4693	18.8642	18.6211	18.7996
	CB047_HUMAN	Uncharacterized protein C2orf47, mitochondrial OS=Homo sapiens GN=C2orf47 PE=1 SV=1	3	0.049977	1.23908	16.9259	17.1269	16.2012	16.3903	16.6998	16.9487	15.9729	16.5711
	SC61B_HUMAN	Protein transport protein Sec61 subunit beta OS=Homo sapiens GN=SEC61B PE=1 SV=2	3	0.0410336	1.23403	18.8667	19.0241	18.8972	19.4321	19.0257	19.2014	19.0478	19.3934
	TAP2_HUMAN	Antigen peptide transporter 2 OS=Homo sapiens GN=TAP2 PE=1 SV=1	13	0.0314775	1.22528	18.305	18.7334	18.376	18.7634	18.5154	18.7857	18.4556	18.5419
	RAB23_HUMAN	Ras-related protein Rab-23 OS=Homo sapiens GN=RAB23 PE=1 SV=1	3	0.0119031	1.22043	16.651	16.8648	16.684	17.1268	16.8462	17.0903	16.2879	16.5368
	UTRO_HUMAN	Utrophin OS=Homo sapiens GN=UTRN PE=1 SV=2	54	0.0092856	1.22024	19.3035	19.6181	19.6901	19.973	19.6072	19.7677	19.7042	20.0948
	SRSF1_HUMAN	Serine/arginine-rich splicing factor 1 OS=Homo sapiens GN=SRSF1 PE=1 SV=2	13	0.0104129	1.21913	20.7578	20.9999	20.622	20.9909	20.6977	20.8639	20.594	20.9604
	NP1L4_HUMAN	Nucleosome assembly protein 1-like 4 OS=Homo sapiens GN=NAP1L4 PE=1 SV=1	8	0.047469	1.21499	18.2479	18.6797	18.5739	18.6169	18.4895	18.7572	18.6937	19.075
	HP1B3_HUMAN	Heterochromatin protein 1-binding protein 3 OS=Homo sapiens GN=HP1BP3 PE=1 SV=1	22	0.0478718	1.21173	19.6408	19.7531	19.1186	19.6196	19.2922	19.4736	19.3053	19.619
	NCPR_HUMAN	NADPH--cytochrome P450 reductase OS=Homo sapiens GN=POR PE=1 SV=2	30	0.0200332	1.20843	20.4063	20.6037	20.2841	20.5461	20.5623	20.7489	20.4831	20.9297
	IF4A1_HUMAN	Eukaryotic initiation factor 4A-I OS=Homo sapiens GN=EIF4A1 PE=1 SV=1	20	0.00607925	1.20753	19.6765	19.9479	19.7774	20.029	19.6443	20.0209	19.8803	20.0688
	GHC1_HUMAN	Mitochondrial glutamate carrier 1 OS=Homo sapiens GN=SLC25A22 PE=1 SV=1	6	0.0093532	1.18686	18.3593	18.5331	18.2686	18.446	18.1243	18.4386	18.0391	18.362
	RBP2_HUMAN	E3 SUMO-protein ligase RanBP2 OS=Homo sapiens GN=RANBP2 PE=1 SV=2	28	0.0484886	1.17962	19.1129	19.3025	19.1808	19.2748	18.9883	19.2141	19.016	19.4599
	GNA13_HUMAN	Guanine nucleotide-binding protein subunit alpha-13 OS=Homo sapiens GN=GNA13 PE=1 SV=2	13	0.0407286	1.17779	18.4501	18.7061	18.5231	18.9038	18.5687	18.6198	18.3708	18.6273
	MAP1B_HUMAN	Microtubule-associated protein 1B OS=Homo sapiens GN=MAP1B PE=1 SV=2	45	0.0169711	1.16817	19.9146	20.0154	19.8759	20.1581	19.9226	20.2305	20.2323	20.4386
	CN37_HUMAN	2,3-cyclic-nucleotide 3-phosphodiesterase OS=Homo sapiens GN=CNP PE=1 SV=2	25	0.0178394	1.16042	20.2068	20.4134	20.4248	20.593	20.418	20.5576	20.3468	20.691
	1433Z_HUMAN	14-3-3 protein zeta/delta OS=Homo sapiens GN=YWHAZ PE=1 SV=1	16	0.0400341	1.14095	20.7056	20.7338	20.7685	20.9891	20.5462	20.7996	20.8431	21.1019
	PHB_HUMAN	Prohibitin OS=Homo sapiens GN=PHB PE=1 SV=1	22	0.0475368	1.13965	21.5279	21.692	21.3721	21.7009	21.38	21.593	21.281	21.3296
	ILF2_HUMAN	Interleukin enhancer-binding factor 2 OS=Homo sapiens GN=ILF2 PE=1 SV=2	19	0.0141736	1.13432	21.0368	21.3223	21.3694	21.4972	21.2646	21.417	21.2622	21.4239
	THIK_HUMAN	3-ketoacyl-CoA thiolase, peroxisomal OS=Homo sapiens GN=ACAA1 PE=1 SV=2	14	0.00749825	1.11908	19.3505	19.4877	19.5307	19.7088	19.3209	19.5454	19.5421	19.6515
	MPCP_HUMAN	Phosphate carrier protein, mitochondrial OS=Homo sapiens GN=SLC25A3 PE=1 SV=2	19	0.0332231	1.11791	21.9602	22.2189	21.9667	22.1465	21.9157	21.9663	21.7915	21.9455
	KCRB_HUMAN	Creatine kinase B-type OS=Homo sapiens GN=CKB PE=1 SV=1	14	0.0454601	1.1089	19.7725	19.8123	20.0591	20.1712	19.4953	19.7312	19.7606	19.9692
	STX4_HUMAN	Syntaxin-4 OS=Homo sapiens GN=STX4 PE=1 SV=2	9	0.0175412	1.09749	17.4286	17.6293	17.5591	17.6276	17.3858	17.5002	17.5121	17.6653
	FACE1_HUMAN	CAAX prenyl protease 1 homolog OS=Homo sapiens GN=ZMPSTE24 PE=1 SV=2	18	0.0068623	1.09569	20.055	20.2038	19.5895	19.6894	19.9682	20.0671	20.1158	20.2955
	APOL2_HUMAN	Apolipoprotein L2 OS=Homo sapiens GN=APOL2 PE=1 SV=1	10	0.0164831	1.0509	17.6201	17.7171	17.8058	17.8885	17.6405	17.718	17.3631	17.3924
	FAM3C_HUMAN	Protein FAM3C OS=Homo sapiens GN=FAM3C PE=1 SV=1	6	0.0350421	0.952208	17.8248	17.7432	17.65	17.5371	17.7633	17.743	17.8666	17.7987
	CACP_HUMAN	Carnitine O-acetyltransferase OS=Homo sapiens GN=CRAT PE=1 SV=5	15	0.0481371	0.93052	19.2185	19.1501	19.531	19.408	19.2371	19.0521	19.0877	19.0485
	U2AF5_HUMAN	Splicing factor U2AF 35 kDa subunit-like protein OS=Homo sapiens GN=U2AF1L5 PE=1 SV=1;sp	8	0.0274296	0.92838	19.6531	19.4688	19.1712	19.0729	19.1973	19.1328	19.2961	19.2144
	PTBP1_HUMAN	Polypyrimidine tract-binding protein 1 OS=Homo sapiens GN=PTBP1 PE=1 SV=1	21	0.00801973	0.920884	22.0027	21.9099	22.3095	22.2118	22.2055	22.0945	22.1543	21.9801
	TERA_HUMAN	Transitional endoplasmic reticulum ATPase OS=Homo sapiens GN=VCP PE=1 SV=4	47	0.00748187	0.915709	22.5386	22.459	22.5659	22.3909	22.2599	22.1388	22.4482	22.3155
	HS90A_HUMAN	Heat shock protein HSP 90-alpha OS=Homo sapiens GN=HSP90AA1 PE=1 SV=5	33	0.0206239	0.903481	22.0543	21.8792	22.0361	21.8848	21.886	21.681	21.9035	21.8492
	HNRPL_HUMAN	Heterogeneous nuclear ribonucleoprotein L OS=Homo sapiens GN=HNRNPL PE=1 SV=2	25	0.0128165	0.902917	21.8499	21.7726	22.1724	22.0432	21.8927	21.6999	22.007	21.8169
	HS90B_HUMAN	Heat shock protein HSP 90-beta OS=Homo sapiens GN=HSP90AB1 PE=1 SV=4	25	0.0343859	0.862129	21.3652	21.1311	21.5113	21.355	21.2632	20.8965	21.3469	21.2478
	CD81_HUMAN	CD81 antigen OS=Homo sapiens GN=CD81 PE=1 SV=1	3	0.0142007	0.851284	18.9536	18.6384	19.2103	19.0541	19.2276	19.0753	19.5114	19.2059
	PLCA_HUMAN	1-acyl-sn-glycerol-3-phosphate acyltransferase alpha OS=Homo sapiens GN=AGPAT1 PE=1 SV=2	4	0.0496067	0.850775	17.6925	17.4322	17.6992	17.2702	17.1881	17.0629	17.1035	16.9855
	PDE1C_HUMAN	Calcium/calmodulin-dependent 3,5-cyclic nucleotide phosphodiesterase 1C OS=Homo sapiens GN=PDE1C PE=1 SV=1	3	0.0255829	0.842731	16.673	16.2812	16.4489	16.2244	16.5454	16.2773	16.3611	16.2581
	RT07_HUMAN	28S ribosomal protein S7, mitochondrial OS=Homo sapiens GN=MRPS7 PE=1 SV=2	9	0.0219169	0.838282	17.7755	17.5874	17.8124	17.3848	17.8017	17.6127	17.7916	17.5783
	SET_HUMAN	Protein SET OS=Homo sapiens GN=SET PE=1 SV=3;sp	5	0.00815737	0.829369	18.0875	17.9074	17.734	17.3926	17.1978	16.9852	17.5106	17.1651
	ADA10_HUMAN	Disintegrin and metalloproteinase domain-containing protein 10 OS=Homo sapiens GN=ADAM10 PE=1 SV=1	5	0.02168	0.827804	16.0753	15.6766	15.9359	15.8333	15.8993	15.6133	16.0868	15.7834
	XRCC5_HUMAN	X-ray repair cross-complementing protein 5 OS=Homo sapiens GN=XRCC5 PE=1 SV=3	36	0.0491824	0.824004	20.9618	20.5455	20.7196	20.3692	20.4741	20.45	20.6125	20.2861
	DDX17_HUMAN	Probable ATP-dependent RNA helicase DDX17 OS=Homo sapiens GN=DDX17 PE=1 SV=2	21	0.0480187	0.821365	20.2193	20.0908	20.5327	20.3886	20.4961	20.014	20.5602	20.1793
	GLYM_HUMAN	Serine hydroxymethyltransferase, mitochondrial OS=Homo sapiens GN=SHMT2 PE=1 SV=3	23	0.0283315	0.820601	20.9314	20.6762	20.9748	20.7735	21.0107	20.515	20.8046	20.6158
	RBM14_HUMAN	RNA-binding protein 14 OS=Homo sapiens GN=RBM14 PE=1 SV=2	22	0.0252203	0.812062	19.8678	19.4846	20.0547	19.731	19.8548	19.4505	19.7529	19.6629
	HEM6_HUMAN	Oxygen-dependent coproporphyrinogen-III oxidase, mitochondrial OS=Homo sapiens GN=CPOX PE=1 SV=3	8	0.00327718	0.812039	17.4119	17.1424	17.6432	17.3173	17.5018	17.1183	17.63	17.4073
	PCBP2_HUMAN	Poly(rC)-binding protein 2 OS=Homo sapiens GN=PCBP2 PE=1 SV=1	5	0.0308574	0.811683	16.7006	16.1798	17.1431	16.9914	17.2145	16.9564	17.4273	17.1539
	DDB1_HUMAN	DNA damage-binding protein 1 OS=Homo sapiens GN=DDB1 PE=1 SV=1	29	0.00926382	0.808383	19.2808	18.8445	19.4398	19.1432	18.9496	18.7632	19.2054	18.8971
	CD44_HUMAN	CD44 antigen OS=Homo sapiens GN=CD44 PE=1 SV=3	13	0.0172076	0.799994	22.6336	22.3232	22.6316	22.453	22.7631	22.2605	22.6463	22.3501
	EGFR_HUMAN	Epidermal growth factor receptor OS=Homo sapiens GN=EGFR PE=1 SV=2	14	0.0110235	0.799806	18.5398	18.3506	18.916	18.5767	18.72	18.2547	18.8518	18.5564
	CCAR2_HUMAN	Cell cycle and apoptosis regulator protein 2 OS=Homo sapiens GN=CCAR2 PE=1 SV=2	24	0.0177439	0.796855	19.7413	19.2481	19.7681	19.4119	19.3619	19.2023	19.5664	19.2648
	TMED9_HUMAN	Transmembrane emp24 domain-containing protein 9 OS=Homo sapiens GN=TMED9 PE=1 SV=2	5	0.0135597	0.794572	19.345	18.9759	19.4228	19.246	18.8937	18.5921	19.8609	19.3813
	SND1_HUMAN	Staphylococcal nuclease domain-containing protein 1 OS=Homo sapiens GN=SND1 PE=1 SV=1	32	0.0432305	0.79432	20.4301	19.8368	20.2877	20.156	20.4461	20.0895	20.6249	20.3777
	ACSL4_HUMAN	Long-chain-fatty-acid--CoA ligase 4 OS=Homo sapiens GN=ACSL4 PE=1 SV=2	19	0.0184714	0.791303	18.8459	18.3982	18.8572	18.732	19.0065	18.6131	19.2251	18.8406
	RM37_HUMAN	39S ribosomal protein L37, mitochondrial OS=Homo sapiens GN=MRPL37 PE=1 SV=2	6	0.0431917	0.789138	17.3497	16.8988	17.289	16.8839	17.301	16.8312	16.9512	16.9103
	AP2B1_HUMAN	AP-2 complex subunit beta OS=Homo sapiens GN=AP2B1 PE=1 SV=1	20	0.0468867	0.787898	20.2255	19.8927	20.347	19.7721	20.1561	19.7557	19.8967	19.829
	RS3_HUMAN	40S ribosomal protein S3 OS=Homo sapiens GN=RPS3 PE=1 SV=2	14	0.0201716	0.782788	19.5853	19.3099	19.7453	19.5726	19.6551	19.1503	19.7769	19.3166
	ROA3_HUMAN	Heterogeneous nuclear ribonucleoprotein A3 OS=Homo sapiens GN=HNRNPA3 PE=1 SV=2	24	0.0293096	0.778125	21.055	20.4819	21.0275	20.8121	20.9953	20.5361	20.8811	20.681
	S35B2_HUMAN	Adenosine 3-phospho 5-phosphosulfate transporter 1 OS=Homo sapiens GN=SLC35B2 PE=1 SV=1	5	0.0383125	0.775368	16.1657	15.554	16.9501	16.8454	16.1432	15.7616	16.2406	15.8705
	OAT_HUMAN	Ornithine aminotransferase, mitochondrial OS=Homo sapiens GN=OAT PE=1 SV=1	18	0.0229198	0.773065	20.312	19.9233	20.3564	19.825	20.3129	19.8765	20.2313	20.1023
	RBBP7_HUMAN	Histone-binding protein RBBP7 OS=Homo sapiens GN=RBBP7 PE=1 SV=1	6	0.0153384	0.770187	19.4755	19.1355	19.3859	18.9733	19.3063	18.7485	18.9766	18.7802
	RS14_HUMAN	40S ribosomal protein S14 OS=Homo sapiens GN=RPS14 PE=1 SV=3	5	0.0378399	0.768695	17.8355	17.6296	18.0864	17.7243	18.181	17.4965	18.2321	17.9666
	NDUA8_HUMAN	NADH dehydrogenase [ubiquinone] 1 alpha subcomplex subunit 8 OS=Homo sapiens GN=NDUFA8 PE=1 SV=3	3	0.0359344	0.76309	15.886	15.6157	16.6095	16.0388	15.8263	15.2551	15.4767	15.3286
	PSMD2_HUMAN	26S proteasome non-ATPase regulatory subunit 2 OS=Homo sapiens GN=PSMD2 PE=1 SV=3	29	0.000311516	0.761389	19.3209	18.9377	19.4647	19.026	19.1518	18.7424	19.4318	19.0899
	ITA3_HUMAN	Integrin alpha-3 OS=Homo sapiens GN=ITGA3 PE=1 SV=5	26	0.0269234	0.758621	21.1307	20.7401	21.4375	21.2831	21.2597	20.6253	21.3573	20.9424
	SEPT9_HUMAN	Septin-9 OS=Homo sapiens GN=SEPT9 PE=1 SV=2	11	0.00272026	0.75791	18.438	17.9214	18.493	18.1033	18.2148	17.9087	17.6718	17.2846
	RS24_HUMAN	40S ribosomal protein S24 OS=Homo sapiens GN=RPS24 PE=1 SV=1	5	0.0277153	0.752649	19.0307	18.8918	19.1527	18.7548	19.2523	18.6255	19.2878	18.8115
	NDUA9_HUMAN	NADH dehydrogenase [ubiquinone] 1 alpha subcomplex subunit 9, mitochondrial OS=Homo sapiens GN=NDUFA9 PE=1 SV=2	12	0.0248062	0.749829	18.5869	18.3431	18.659	18.392	18.8693	18.2064	18.6465	18.1587
	PRKDC_HUMAN	DNA-dependent protein kinase catalytic subunit OS=Homo sapiens GN=PRKDC PE=1 SV=3	145	0.00106341	0.749497	22.8158	22.486	22.7143	22.2409	22.7145	22.254	22.6328	22.2325
	HDAC2_HUMAN	Histone deacetylase 2 OS=Homo sapiens GN=HDAC2 PE=1 SV=2	5	0.024559	0.746026	17.3707	16.6643	17.9096	17.523	17.6339	17.2686	17.6106	17.3782
	SMCE1_HUMAN	SWI/SNF-related matrix-associated actin-dependent regulator of chromatin subfamily E member 1 OS=Homo sapiens GN=SMARCE1 PE=1 SV=2	5	0.00255811	0.742961	16.4506	15.9636	16.5747	16.2704	16.4129	15.9068	16.284	15.8668
	RS16_HUMAN	40S ribosomal protein S16 OS=Homo sapiens GN=RPS16 PE=1 SV=2	9	0.0221116	0.742666	19.2968	18.7979	18.8199	18.6811	19.2464	18.6752	19.2939	18.7859
	ANM1_HUMAN	Protein arginine N-methyltransferase 1 OS=Homo sapiens GN=PRMT1 PE=1 SV=2	7	0.0404176	0.742129	16.907	16.7221	17.0967	16.3661	16.35	15.8192	16.6745	16.3998
	RS26_HUMAN	40S ribosomal protein S26 OS=Homo sapiens GN=RPS26 PE=1 SV=3;sp	2	0.0413733	0.740156	17.6279	17.5615	18.0512	17.449	17.9561	17.3578	18.0106	17.5411
	HNRPM_HUMAN	Heterogeneous nuclear ribonucleoprotein M OS=Homo sapiens GN=HNRNPM PE=1 SV=3	53	0.0212315	0.73988	22.5044	22.1273	22.5676	22.3745	22.2163	21.5668	22.258	21.7391
	CCHL_HUMAN	Cytochrome c-type heme lyase OS=Homo sapiens GN=HCCS PE=1 SV=1	12	0.0221626	0.7398	18.6867	18.156	18.683	18.0162	18.4555	18.216	18.4975	18.1954
	NDUS2_HUMAN	NADH dehydrogenase [ubiquinone] iron-sulfur protein 2, mitochondrial OS=Homo sapiens GN=NDUFS2 PE=1 SV=2	18	0.0301877	0.730621	19.0775	18.9471	19.9086	19.2253	19.719	19.1925	19.4149	18.9438
	AIMP2_HUMAN	Aminoacyl tRNA synthase complex-interacting multifunctional protein 2 OS=Homo sapiens GN=AIMP2 PE=1 SV=2	2	0.0453889	0.728513	15.818	15.5808	16.536	16.326	16.1388	15.3763	16.5752	15.957
	AN32B_HUMAN	Acidic leucine-rich nuclear phosphoprotein 32 family member B OS=Homo sapiens GN=ANP32B PE=1 SV=1;sp	2	0.0464002	0.728255	15.584	15.4164	15.5785	15.2538	16.003	15.1886	16.0912	15.5679
	NDUS1_HUMAN	NADH-ubiquinone oxidoreductase 75 kDa subunit, mitochondrial OS=Homo sapiens GN=NDUFS1 PE=1 SV=3	19	0.00463607	0.726063	19.2252	18.8244	19.375	19.0533	19.3676	18.7972	19.0313	18.4769
	NDUB9_HUMAN	NADH dehydrogenase [ubiquinone] 1 beta subcomplex subunit 9 OS=Homo sapiens GN=NDUFB9 PE=1 SV=3	2	0.0343479	0.725831	15.3994	15.0389	16.11	15.4468	15.3704	14.7008	15.4737	15.3178
	RS13_HUMAN	40S ribosomal protein S13 OS=Homo sapiens GN=RPS13 PE=1 SV=2	10	0.0202568	0.72301	18.6815	18.4083	18.8789	18.572	18.9985	18.3803	19.2992	18.6258
	OCAD1_HUMAN	OCIA domain-containing protein 1 OS=Homo sapiens GN=OCIAD1 PE=1 SV=1	7	0.0407352	0.722804	18.8535	18.1113	18.5358	18.4419	18.1981	17.6788	18.4132	17.8953
	GTF2I_HUMAN	General transcription factor II-I OS=Homo sapiens GN=GTF2I PE=1 SV=2	19	0.0214491	0.722714	19.2782	18.6097	19.153	18.9732	19.1687	18.716	19.2156	18.6425
	MPRI_HUMAN	Cation-independent mannose-6-phosphate receptor OS=Homo sapiens GN=IGF2R PE=1 SV=3	15	0.0306351	0.718731	18.1856	17.713	18.1774	17.563	18.1437	17.4564	18.1499	18.0183
	GBB4_HUMAN	Guanine nucleotide-binding protein subunit beta-4 OS=Homo sapiens GN=GNB4 PE=1 SV=3	4	0.036807	0.708165	16.0228	15.4069	16.251	15.7124	15.8209	15.7198	16.3048	15.5689
	RM04_HUMAN	39S ribosomal protein L4, mitochondrial OS=Homo sapiens GN=MRPL4 PE=1 SV=1	10	0.0270141	0.707387	17.344	16.6754	17.8108	17.0642	17.66	17.4217	17.9153	17.5711
	CATA_HUMAN	Catalase OS=Homo sapiens GN=CAT PE=1 SV=3	21	0.0455365	0.704325	18.8289	18.6659	19.7464	19.4104	19.5457	18.7427	19.5633	18.8426
	SMU1_HUMAN	WD40 repeat-containing protein SMU1 OS=Homo sapiens GN=SMU1 PE=1 SV=2	17	0.0447105	0.699505	18.2759	18.064	18.9263	18.6389	18.7582	18.0068	18.6256	17.8138
	SCAF8_HUMAN	Protein SCAF8 OS=Homo sapiens GN=SCAF8 PE=1 SV=1	1	0.0271994	0.699482	14.1287	13.2963	13.6071	13.3987	13.4172	12.8952	14.4502	13.9503
	SEP11_HUMAN	Septin-11 OS=Homo sapiens GN=SEPT11 PE=1 SV=3	5	0.0453096	0.698724	17.5988	16.8521	17.5066	17.3343	16.9396	16.6037	17.4843	16.6704
	TIF1B_HUMAN	Transcription intermediary factor 1-beta OS=Homo sapiens GN=TRIM28 PE=1 SV=5	27	0.0103681	0.69727	21.1523	20.4125	21.0984	20.6389	20.6859	20.3739	20.7784	20.209
	OXA1L_HUMAN	Mitochondrial inner membrane protein OXA1L OS=Homo sapiens GN=OXA1L PE=1 SV=3	2	0.042377	0.696474	15.3485	14.4876	15.1333	14.894	15.4264	14.7256	15.1638	14.8774
	TCPD_HUMAN	T-complex protein 1 subunit delta OS=Homo sapiens GN=CCT4 PE=1 SV=4	21	0.00184361	0.694812	19.7626	19.2277	19.8437	19.3084	19.7641	19.1268	19.7097	19.3159
	LAMC1_HUMAN	Laminin subunit gamma-1 OS=Homo sapiens GN=LAMC1 PE=1 SV=3	12	0.0382323	0.694565	17.7486	16.888	17.9626	17.6873	17.979	17.2883	17.8634	17.5867
	TCPB_HUMAN	T-complex protein 1 subunit beta OS=Homo sapiens GN=CCT2 PE=1 SV=4	27	0.00243646	0.693743	20.2511	19.7298	20.3121	19.8589	20.0266	19.5767	20.3198	19.6341
	ITAV_HUMAN	Integrin alpha-V OS=Homo sapiens GN=ITGAV PE=1 SV=2	22	0.00644006	0.689666	19.323	18.7355	19.631	18.9874	19.3647	19.0618	19.4827	18.8726
	ITA6_HUMAN	Integrin alpha-6 OS=Homo sapiens GN=ITGA6 PE=1 SV=5	13	0.0142781	0.685622	18.4341	18.1547	18.5032	17.7257	18.6749	18.1838	18.7539	18.1237
	TCPQ_HUMAN	T-complex protein 1 subunit theta OS=Homo sapiens GN=CCT8 PE=1 SV=4	27	0.013928	0.68213	20.617	19.9958	20.6309	19.9927	20.3564	19.6461	20.3368	20.0989
	LAP2A_HUMAN	Lamina-associated polypeptide 2, isoform alpha OS=Homo sapiens GN=TMPO PE=1 SV=2	10	0.0310499	0.6813	18.9358	18.2394	18.6485	18.412	18.5726	18.1691	18.9168	18.0386
	TCPG_HUMAN	T-complex protein 1 subunit gamma OS=Homo sapiens GN=CCT3 PE=1 SV=4	24	0.00422192	0.678478	20.4478	20.096	20.7018	20.0482	20.5148	19.9271	20.6333	19.9879
	UHRF1_HUMAN	E3 ubiquitin-protein ligase UHRF1 OS=Homo sapiens GN=UHRF1 PE=1 SV=1	7	0.0394167	0.673896	16.3248	15.703	15.476	14.6851	16.1882	15.4182	15.6543	15.5594
	UBP7_HUMAN	Ubiquitin carboxyl-terminal hydrolase 7 OS=Homo sapiens GN=USP7 PE=1 SV=2	7	0.0338891	0.670463	17.2483	16.9554	17.5308	16.646	17.4225	16.6198	17.0136	16.6869
	RT29_HUMAN	28S ribosomal protein S29, mitochondrial OS=Homo sapiens GN=DAP3 PE=1 SV=1	9	0.0485434	0.670393	18.9287	18.714	19.213	18.2446	19.2085	18.4226	18.8364	18.4977
	CD70_HUMAN	CD70 antigen OS=Homo sapiens GN=CD70 PE=1 SV=2	7	0.0086868	0.669948	20.3676	19.5137	20.4694	19.9872	20.0825	19.5464	20.3234	19.8841
	P5CR1_HUMAN	Pyrroline-5-carboxylate reductase 1, mitochondrial OS=Homo sapiens GN=PYCR1 PE=1 SV=2	10	0.00195178	0.668998	18.2827	17.6445	18.3443	17.9263	18.2371	17.6444	18.5358	17.865
	PDIP2_HUMAN	Polymerase delta-interacting protein 2 OS=Homo sapiens GN=POLDIP2 PE=1 SV=1	8	0.00980347	0.667162	17.2098	16.8945	17.7565	17.0033	17.486	16.7734	17.639	17.0845
	PLOD1_HUMAN	Procollagen-lysine,2-oxoglutarate 5-dioxygenase 1 OS=Homo sapiens GN=PLOD1 PE=1 SV=2	24	0.000107962	0.660987	19.9931	19.437	20.4084	19.8456	20.1279	19.4919	20.0301	19.3959
	P4HA2_HUMAN	Prolyl 4-hydroxylase subunit alpha-2 OS=Homo sapiens GN=P4HA2 PE=1 SV=1	6	0.015742	0.654622	16.1327	15.5599	16.9584	16.0063	16.6157	16.0582	16.8565	16.4938
	TCPE_HUMAN	T-complex protein 1 subunit epsilon OS=Homo sapiens GN=CCT5 PE=1 SV=1	25	0.0176819	0.652751	19.8644	19.0594	19.9174	19.1788	19.5239	19.2898	20.0289	19.3451
	SMCA1_HUMAN	Probable global transcription activator SNF2L1 OS=Homo sapiens GN=SMARCA1 PE=1 SV=2	7	0.0498632	0.647391	15.9916	14.8349	15.8178	15.4282	16.5736	16.2993	16.8907	16.2022
	TRFE_HUMAN	Serotransferrin OS=Homo sapiens GN=TF PE=1 SV=3	8	0.0320265	0.646927	17.026	16.6555	16.8405	16.1022	15.8171	15.4603	17.6577	16.6099
	CATD_HUMAN	Cathepsin D OS=Homo sapiens GN=CTSD PE=1 SV=1	16	0.0337637	0.640039	21.0234	20.833	21.3857	20.7562	21.1613	20.432	21.5156	20.4898
	SMC4_HUMAN	Structural maintenance of chromosomes protein 4 OS=Homo sapiens GN=SMC4 PE=1 SV=2	7	0.0338868	0.6397	15.9981	15.6063	16.8799	16.0826	16.728	15.6669	16.1182	15.7901
	TCPA_HUMAN	T-complex protein 1 subunit alpha OS=Homo sapiens GN=TCP1 PE=1 SV=1	24	0.00456037	0.638926	20.3629	19.6763	20.602	19.7428	20.278	19.7052	20.3961	19.9296
	AP2M1_HUMAN	AP-2 complex subunit mu OS=Homo sapiens GN=AP2M1 PE=1 SV=2	12	0.0183992	0.637787	18.5912	18.2453	18.6577	17.7431	18.6545	18.1704	18.5555	17.7048
	CDK2_HUMAN	Cyclin-dependent kinase 2 OS=Homo sapiens GN=CDK2 PE=1 SV=2;sp	2	0.0485881	0.632453	15.1965	14.4394	14.6512	13.5127	13.7692	13.623	13.405	12.803
	RT11_HUMAN	28S ribosomal protein S11, mitochondrial OS=Homo sapiens GN=MRPS11 PE=1 SV=2	3	0.0432902	0.63156	15.4556	14.9896	15.633	15.2084	16.2821	15.032	16.0718	15.5606
	RSSA_HUMAN	40S ribosomal protein SA OS=Homo sapiens GN=RPSA PE=1 SV=4	11	0.0279827	0.630811	19.5192	19.3514	20.2464	19.3876	19.8932	19.0581	20.2068	19.4097
	PDK3_HUMAN	[Pyruvate dehydrogenase (acetyl-transferring)] kinase isozyme 3, mitochondrial OS=Homo sapiens GN=PDK3 PE=1 SV=1	4	0.000644911	0.627591	15.9072	15.1198	16.4488	15.7764	16.337	15.6773	15.9243	15.3555
	PSB5_HUMAN	Proteasome subunit beta type-5 OS=Homo sapiens GN=PSMB5 PE=1 SV=3	5	0.00886278	0.621746	16.3556	15.8264	16.8001	16.0056	15.8597	15.3894	16.2796	15.3312
	RM03_HUMAN	39S ribosomal protein L3, mitochondrial OS=Homo sapiens GN=MRPL3 PE=1 SV=1	3	0.0494971	0.620328	16.9635	16.8648	17.165	16.3936	17.3087	16.5578	17.0844	15.9498
	PICAL_HUMAN	Phosphatidylinositol-binding clathrin assembly protein OS=Homo sapiens GN=PICALM PE=1 SV=2	8	0.0146268	0.618856	18.389	18.0368	18.5746	17.9426	18.5119	17.5141	18.5397	17.7525
	FDFT_HUMAN	Squalene synthase OS=Homo sapiens GN=FDFT1 PE=1 SV=1	17	0.0310928	0.618075	20.2633	19.7152	19.8944	18.7197	20.258	19.5268	19.7745	19.4518
	PLAK_HUMAN	Junction plakoglobin OS=Homo sapiens GN=JUP PE=1 SV=3	7	0.0133159	0.615719	17.1701	16.7807	17.8062	16.7927	17.4481	16.659	17.6336	17.027
	TMX4_HUMAN	Thioredoxin-related transmembrane protein 4 OS=Homo sapiens GN=TMX4 PE=1 SV=1	5	0.0477463	0.613523	17.1564	17.0066	17.4654	16.2557	17.1126	16.3464	17.4418	16.7483
	PLXB2_HUMAN	Plexin-B2 OS=Homo sapiens GN=PLXNB2 PE=1 SV=3	15	0.00919581	0.612191	17.9218	17.5221	18.3327	17.5689	18.0029	17.0345	18.0642	17.3644
	TCPZ_HUMAN	T-complex protein 1 subunit zeta OS=Homo sapiens GN=CCT6A PE=1 SV=3	17	0.00311803	0.611426	19.9938	19.3642	19.9798	19.3066	19.4602	18.871	19.7065	18.7596
	P5CR2_HUMAN	Pyrroline-5-carboxylate reductase 2 OS=Homo sapiens GN=PYCR2 PE=1 SV=1	6	0.00207711	0.601083	17.7771	16.8698	17.7952	17.1149	17.6589	17.0929	17.901	17.1171
	RRBP1_HUMAN	Ribosome-binding protein 1 OS=Homo sapiens GN=RRBP1 PE=1 SV=4	53	0.013671	0.5968	21.2599	20.2634	20.9077	20.573	21.2917	20.4584	21.288	20.4737
	PPAL_HUMAN	Lysosomal acid phosphatase OS=Homo sapiens GN=ACP2 PE=1 SV=3	7	0.0203742	0.595712	16.9249	16.1089	17.7149	16.6104	17.0461	16.2809	16.8658	16.5622
	GOLI4_HUMAN	Golgi integral membrane protein 4 OS=Homo sapiens GN=GOLIM4 PE=1 SV=1	9	0.0184268	0.59445	16.6029	15.4159	16.7273	16.2585	17.027	16.2391	16.7095	16.1518
	IBP7_HUMAN	Insulin-like growth factor-binding protein 7 OS=Homo sapiens GN=IGFBP7 PE=1 SV=1	6	0.00399043	0.591783	17.4537	16.7385	17.6814	17.0773	17.437	16.7588	17.5434	16.5135
	LDLR_HUMAN	Low-density lipoprotein receptor OS=Homo sapiens GN=LDLR PE=1 SV=1	6	0.00692405	0.590958	17.2543	16.4603	17.2751	16.455	17.7691	16.7878	17.1759	16.736
	EIF3M_HUMAN	Eukaryotic translation initiation factor 3 subunit M OS=Homo sapiens GN=EIF3M PE=1 SV=1	9	0.0204513	0.587505	17.2757	16.7149	17.8078	17.1566	18.3827	17.1075	18.3676	17.7855
	FSTL1_HUMAN	Follistatin-related protein 1 OS=Homo sapiens GN=FSTL1 PE=1 SV=1	3	0.0275924	0.582814	14.7696	13.6475	14.7897	14.5073	14.6807	13.6331	15.0923	14.4288
	TCPH_HUMAN	T-complex protein 1 subunit eta OS=Homo sapiens GN=CCT7 PE=1 SV=2	23	0.00563677	0.582728	19.7843	18.9911	19.8187	19.063	19.5985	18.5485	19.5567	19.0391
	SORT_HUMAN	Sortilin OS=Homo sapiens GN=SORT1 PE=1 SV=3	8	0.0204258	0.58122	17.7722	16.8846	17.6897	16.6365	17.6161	16.6983	17.4926	17.2197
	RM47_HUMAN	39S ribosomal protein L47, mitochondrial OS=Homo sapiens GN=MRPL47 PE=1 SV=2	6	0.0306394	0.574352	16.7311	16.3648	16.4158	15.402	16.7985	16.2465	17.5753	16.3074
	ITB4_HUMAN	Integrin beta-4 OS=Homo sapiens GN=ITGB4 PE=1 SV=5	26	0.00566226	0.571131	19.0237	18.2173	19.3803	18.3189	19.2923	18.4397	19.2511	18.7392
	S10A6_HUMAN	Protein S100-A6 OS=Homo sapiens GN=S100A6 PE=1 SV=1	7	0.0109406	0.56619	19.3119	18.3492	18.8765	18.4039	18.8382	18.1268	18.9049	17.7691
	THY1_HUMAN	Thy-1 membrane glycoprotein OS=Homo sapiens GN=THY1 PE=1 SV=2	4	0.00112153	0.563925	18.4391	17.7596	18.8263	17.9325	18.8502	17.875	19.0725	18.3152
	TIM23_HUMAN	Mitochondrial import inner membrane translocase subunit Tim23 OS=Homo sapiens GN=TIMM23 PE=1 SV=1;sp	5	0.014991	0.561777	17.164	16.5525	17.0048	16.4309	17.0896	15.7991	17.5986	16.7469
	EPN1_HUMAN	Epsin-1 OS=Homo sapiens GN=EPN1 PE=1 SV=2	4	0.011925	0.56059	15.9377	15.0822	15.9549	15.5038	15.884	14.6879	16.1214	15.2844
	PLOD2_HUMAN	Procollagen-lysine,2-oxoglutarate 5-dioxygenase 2 OS=Homo sapiens GN=PLOD2 PE=1 SV=2	17	0.00105594	0.555039	19.4694	18.7188	19.8954	18.9385	19.9076	18.9354	19.923	19.2054
	EPDR1_HUMAN	Mammalian ependymin-related protein 1 OS=Homo sapiens GN=EPDR1 PE=1 SV=2	3	0.0443547	0.552286	16.6049	16.506	17.6432	16.6364	17.2414	16.1435	17.1767	15.9543
	OCAD2_HUMAN	OCIA domain-containing protein 2 OS=Homo sapiens GN=OCIAD2 PE=1 SV=1	4	0.00703526	0.551682	16.5657	15.8802	17.57	16.9068	17.1164	15.892	17.3987	16.5395
	CSK22_HUMAN	Casein kinase II subunit alpha OS=Homo sapiens GN=CSNK2A2 PE=1 SV=1	4	0.0232557	0.55113	16.8833	15.8659	16.1103	15.8499	16.6843	15.606	17.0808	15.9987
	HDAC1_HUMAN	Histone deacetylase 1 OS=Homo sapiens GN=HDAC1 PE=1 SV=1	8	0.00447425	0.547703	18.7948	18.0867	19.2352	18.5666	18.8354	17.8871	19.1171	17.9679
	RPB2_HUMAN	DNA-directed RNA polymerase II subunit RPB2 OS=Homo sapiens GN=POLR2B PE=1 SV=1	6	0.0495747	0.546381	15.0917	14.8543	16.2163	15.4762	16.2719	15.3173	16.5496	14.9936
	ECE1_HUMAN	Endothelin-converting enzyme 1 OS=Homo sapiens GN=ECE1 PE=1 SV=2	17	0.00848594	0.535241	18.3711	17.4456	18.6895	17.3878	18.5158	17.7805	18.7731	18.1287
	RT23_HUMAN	28S ribosomal protein S23, mitochondrial OS=Homo sapiens GN=MRPS23 PE=1 SV=2	3	0.0255894	0.519257	16.4473	16.0926	16.6854	15.8138	16.1229	14.6861	16.3245	15.2057
	DHX8_HUMAN	ATP-dependent RNA helicase DHX8 OS=Homo sapiens GN=DHX8 PE=1 SV=1	4	0.0479104	0.518851	15.3091	15.2312	15.2067	14.0363	15.7234	14.5341	15.5823	14.2335
	RACK1_HUMAN	Receptor of activated protein C kinase 1 OS=Homo sapiens GN=RACK1 PE=1 SV=3	13	0.0383486	0.509237	18.4063	17.5905	19.0364	17.3353	18.2081	17.8284	19.2101	18.2123
	TP53B_HUMAN	Tumor suppressor p53-binding protein 1 OS=Homo sapiens GN=TP53BP1 PE=1 SV=2	5	0.0182941	0.502327	14.845	14.0812	15.4982	13.987	14.5672	13.4222	15.3145	14.7613
	DPP4_HUMAN	Dipeptidyl peptidase 4 OS=Homo sapiens GN=DPP4 PE=1 SV=2	2	0.0456699	0.488649	13.4926	13.359	13.5441	12.0606	13.4051	11.9714	14.4736	13.3919
	PRP4_HUMAN	U4/U6 small nuclear ribonucleoprotein Prp4 OS=Homo sapiens GN=PRPF4 PE=1 SV=2	4	0.00180713	0.482881	16.0804	14.8113	16.8062	15.9004	16.4041	15.2379	16.3176	15.4576
	NDUA6_HUMAN	NADH dehydrogenase [ubiquinone] 1 alpha subcomplex subunit 6 OS=Homo sapiens GN=NDUFA6 PE=1 SV=3	2	0.0300601	0.477449	14.4301	12.7292	15.9023	15.2715	15.334	13.9866	15.6703	15.0829
	APLP2_HUMAN	Amyloid-like protein 2 OS=Homo sapiens GN=APLP2 PE=1 SV=2	4	0.00619056	0.470589	13.8183	13.1489	14.3359	13.2017	13.7875	12.3554	14.4069	13.2928
	PLD3_HUMAN	Phospholipase D3 OS=Homo sapiens GN=PLD3 PE=1 SV=1	8	0.00242795	0.470583	17.6372	16.8771	17.9801	16.7235	17.5629	16.4554	17.7731	16.5475
	ARF_HUMAN	Tumor suppressor ARF OS=Homo sapiens GN=CDKN2A PE=1 SV=2	5	0.00858697	0.452108	18.12	16.993	18.4554	17.5459	18.3306	16.6547	18.1707	17.3021
	CX6B1_HUMAN	Cytochrome c oxidase subunit 6B1 OS=Homo sapiens GN=COX6B1 PE=1 SV=2	2	0.0186991	0.444782	14.0775	13.5991	15.1565	13.9184	13.1474	11.8705	15.6437	13.9617
	RIC8A_HUMAN	Synembryn-A OS=Homo sapiens GN=RIC8A PE=1 SV=3	2	0.0406593	0.439398	12.7347	11.7434	13.9866	11.8055	13.4338	12.4679	12.465	11.8577
	PDP1_HUMAN	[Pyruvate dehydrogenase [acetyl-transferring]]-phosphatase 1, mitochondrial OS=Homo sapiens GN=PDP1 PE=1 SV=3	12	0.0377112	0.437893	17.6705	17.4313	19.1352	17.9077	18.8194	17.2524	19.3326	17.601
	TPBG_HUMAN	Trophoblast glycoprotein OS=Homo sapiens GN=TPBG PE=1 SV=1	2	0.0400267	0.437653	14.2758	13.599	15.5373	14.4013	14.4635	13.684	15.4164	13.2402
	GNS_HUMAN	N-acetylglucosamine-6-sulfatase OS=Homo sapiens GN=GNS PE=1 SV=3	9	0.0396014	0.42201	18.3391	17.6524	18.6174	17.6265	18.1077	17.0961	18.6195	16.3302
	VIGLN_HUMAN	Vigilin OS=Homo sapiens GN=HDLBP PE=1 SV=2	4	0.0408442	0.421762	13.9675	13.7946	16.0016	14.3914	15.4236	13.7078	16.0542	14.571
	PXDN_HUMAN	Peroxidasin homolog OS=Homo sapiens GN=PXDN PE=1 SV=2	7	0.0147584	0.420915	15.923	15.1936	15.8268	14.8981	15.7129	14.078	16.2692	14.5686
	KINH_HUMAN	Kinesin-1 heavy chain OS=Homo sapiens GN=KIF5B PE=1 SV=1	6	0.0457941	0.419261	16.1163	15.867	16.3752	14.6468	15.4067	13.4634	15.3053	14.2101
	NBN_HUMAN	Nibrin OS=Homo sapiens GN=NBN PE=1 SV=1	2	0.0203105	0.411094	14.2063	13.7013	16.086	14.2183	14.6792	13.2635	14.8257	13.4842
	OSBL5_HUMAN	Oxysterol-binding protein-related protein 5 OS=Homo sapiens GN=OSBPL5 PE=1 SV=1	2	0.00779561	0.408073	14.0145	12.8744	14.6067	13.2016	13.9401	12.149	15.1277	14.2917
	CO6A1_HUMAN	Collagen alpha-1(VI) chain OS=Homo sapiens GN=COL6A1 PE=1 SV=3	14	9.55278e-05	0.40061	18.3095	17.1207	18.814	17.4515	18.4655	17.063	18.6472	17.3221
	KDM1A_HUMAN	Lysine-specific histone demethylase 1A OS=Homo sapiens GN=KDM1A PE=1 SV=2	4	0.0401328	0.388972	15.9037	15.5142	16.8422	15.5108	16.1632	13.857	16.6991	15.2772
	BRE_HUMAN	BRCA1-A complex subunit BRE OS=Homo sapiens GN=BRE PE=1 SV=2	2	0.0259771	0.388213	13.1096	11.3642	15.6792	15.2894	13.531	11.7152	14.7708	13.2615
	GBG10_HUMAN	Guanine nucleotide-binding protein G(I)/G(S)/G(O) subunit gamma-10 OS=Homo sapiens GN=GNG10 PE=1 SV=1	3	0.045589	0.379723	14.8313	12.2369	15.1055	14.4701	14.0684	13.0238	15.1425	13.829
	NOTC1_HUMAN	Neurogenic locus notch homolog protein 1 OS=Homo sapiens GN=NOTCH1 PE=1 SV=4	2	0.00970309	0.379336	13.9175	11.9115	15.7679	14.2367	13.5388	12.5896	15.3591	14.2517
	CD109_HUMAN	CD109 antigen OS=Homo sapiens GN=CD109 PE=1 SV=2	20	0.00392907	0.374482	18.7449	17.3649	19.4681	17.6684	18.989	18.0272	18.9911	17.4645
	TASOR_HUMAN	Protein TASOR OS=Homo sapiens GN=FAM208A PE=1 SV=3	4	0.0341161	0.368521	14.9075	13.3833	15.2468	13.8215	13.7761	13.3197	15.0965	12.7418
	MYEF2_HUMAN	Myelin expression factor 2 OS=Homo sapiens GN=MYEF2 PE=1 SV=3	8	0.0264801	0.35927	18.074	16.9846	18.3768	17.2355	17.5865	15.0259	17.486	16.3699
	MTU1_HUMAN	Mitochondrial tRNA-specific 2-thiouridylase 1 OS=Homo sapiens GN=TRMU PE=1 SV=2	2	0.00951809	0.358332	15.0786	13.1728	14.7101	13.0261	14.2967	13.5333	15.5937	14.0244
	FADS2_HUMAN	Fatty acid desaturase 2 OS=Homo sapiens GN=FADS2 PE=1 SV=1	9	0.00720925	0.357526	17.6022	15.799	17.0652	15.7511	17.8934	15.9984	17.5193	16.5962
	KDEL1_HUMAN	KDEL motif-containing protein 1 OS=Homo sapiens GN=KDELC1 PE=1 SV=1	2	0.0308617	0.35235	13.5044	11.9196	14.9589	14.3093	15.105	13.8414	15.0975	12.5759
	LAMB2_HUMAN	Laminin subunit beta-2 OS=Homo sapiens GN=LAMB2 PE=1 SV=2	4	0.0111265	0.350897	15.3538	13.2036	15.7913	14.9484	15.7684	14.3185	16.0254	14.4249
	MTDC_HUMAN	Bifunctional methylenetetrahydrofolate dehydrogenase/cyclohydrolase, mitochondrial OS=Homo sapiens GN=MTHFD2 PE=1 SV=2	2	0.0494983	0.337814	17.2235	16.6109	18.3769	16.6241	15.331	14.2889	18.4611	15.6058
	AP3D1_HUMAN	AP-3 complex subunit delta-1 OS=Homo sapiens GN=AP3D1 PE=1 SV=1	2	0.0222065	0.314362	13.5968	12.6651	14.0059	11.2991	14.9043	13.1739	15.3244	14.0152
	XYLK_HUMAN	Glycosaminoglycan xylosylkinase OS=Homo sapiens GN=FAM20B PE=1 SV=1	2	0.0251878	0.29505	17.184	16.4878	15.3972	12.6999	16.6594	15.0859	15.6024	13.5256
	NRP2_HUMAN	Neuropilin-2 OS=Homo sapiens GN=NRP2 PE=1 SV=2	3	0.0397137	0.293506	15.7492	13.7537	15.6176	14.7384	15.6914	12.5876	15.8633	14.7677
	FADS1_HUMAN	Fatty acid desaturase 1 OS=Homo sapiens GN=FADS1 PE=1 SV=3	4	0.0211563	0.276023	15.8466	13.1789	15.3689	13.3455	14.3435	12.2923	13.9802	13.2939
	AGRIN_HUMAN	Agrin OS=Homo sapiens GN=AGRN PE=1 SV=5	3	0.026846	0.263253	15.1495	14.5556	15.4276	13.2525	14.6982	11.8633	14.7047	12.6067
	SPRC_HUMAN	SPARC OS=Homo sapiens GN=SPARC PE=1 SV=1	4	0.0148964	0.237648	17.176	14.3551	17.2024	15.0775	17.0613	14.6354	16.7271	15.8063
	SUZ12_HUMAN	Polycomb protein SUZ12 OS=Homo sapiens GN=SUZ12 PE=1 SV=3	6	0.00341916	0.228975	16.3738	13.7865	16.1654	14.5352	15.1897	12.6631	16.8046	15.0419
	CATC_HUMAN	Dipeptidyl peptidase 1 OS=Homo sapiens GN=CTSC PE=1 SV=2	3	0.0256543	0.228819	14.8229	12.8007	17.145	15.7423	16.3961	14.9242	16.5881	12.974
	SODE_HUMAN	Extracellular superoxide dismutase [Cu-Zn] OS=Homo sapiens GN=SOD3 PE=1 SV=2	4	0.0436305	0.187515	16.6479	14.98	16.8717	15.2832	16.3798	11.8165	16.4574	14.6175
	CDYL1_HUMAN	Chromodomain Y-like protein OS=Homo sapiens GN=CDYL PE=1 SV=2	4	0.0116711	0.179458	13.7601	12.4584	16.3741	13.8589	14.664	12.0505	15.7925	12.3098
	NDUF7_HUMAN	NADH dehydrogenase [ubiquinone] complex I, assembly factor 7 OS=Homo sapiens GN=NDUFAF7 PE=1 SV=1	2	0.0142906	0.160896	13.5855	9.67262	15.4035	13.1024	13.0449	11.5775	15.7519	12.89
	LAMA5_HUMAN	Laminin subunit alpha-5 OS=Homo sapiens GN=LAMA5 PE=1 SV=8	6	0.024958	0.152197	14.3975	13.1448	16.3895	12.4604	16.4155	12.7306	17.0341	15.037
	CDC73_HUMAN	Parafibromin OS=Homo sapiens GN=CDC73 PE=1 SV=1	2	0.00563287	0.136647	15.6657	11.7791	16.1903	13.0524	15.6802	13.3702	15.6331	13.4817
	S39AE_HUMAN	Zinc transporter ZIP14 OS=Homo sapiens GN=SLC39A14 PE=1 SV=3	2	0.00147795	0.109919	16.8642	14.1986	16.6495	13.0549	15.8406	13.1028	16.857	13.113
	KBL_HUMAN	2-amino-3-ketobutyrate coenzyme A ligase, mitochondrial OS=Homo sapiens GN=GCAT PE=1 SV=1	2	0.0427228	0.0740365	13.3573	12.5844	15.9977	11.2719	15.5359	9.58011	16.0403	12.4723
	RAB2B_HUMAN	Ras-related protein Rab-2B OS=Homo sapiens GN=RAB2B PE=1 SV=1	2	0.0500576	1.27301	15.2418	15.4429	14.1313	14.6713	15.4302	15.5506	15.1938	15.7252
	ATLA1_HUMAN	Atlastin-1 OS=Homo sapiens GN=ATL1 PE=1 SV=1	8	0.0503292	1.51918	17.1455	17.7354	17.1485	17.6328	17.575	17.7914	16.7193	17.8418
	PBIP1_HUMAN	Pre-B-cell leukemia transcription factor-interacting protein 1 OS=Homo sapiens GN=PBXIP1 PE=1 SV=1	7	0.0503454	0.657966	17.1412	16.8279	16.3043	15.7424	16.5023	15.3493	15.2434	14.856
	SDCB1_HUMAN	Syntenin-1 OS=Homo sapiens GN=SDCBP PE=1 SV=1	3	0.0503593	0.571986	13.8771	13.7609	15.2101	13.8819	14.1212	13.3076	15.2053	14.2394
	FA49B_HUMAN	Protein FAM49B OS=Homo sapiens GN=FAM49B PE=1 SV=1	7	0.0506967	1.28369	16.3038	16.8783	16.7699	17.2252	16.6072	16.6503	16.9425	17.3108
	PXMP2_HUMAN	Peroxisomal membrane protein 2 OS=Homo sapiens GN=PXMP2 PE=1 SV=3	3	0.0506967	0.288265	14.9491	14.7499	15.8189	14.0339	15.3498	12.6389	15.7658	13.2827
	PRP19_HUMAN	Pre-mRNA-processing factor 19 OS=Homo sapiens GN=PRPF19 PE=1 SV=1	18	0.0508335	0.891547	19.7683	19.599	19.9298	19.8879	19.6917	19.5381	19.6287	19.3309
	BUD31_HUMAN	Protein BUD31 homolog OS=Homo sapiens GN=BUD31 PE=1 SV=2	3	0.0513842	0.497218	15.4218	14.7516	16.4415	14.8176	16.4362	16.1585	16.7378	15.2775
	DYL1_HUMAN	Dynein light chain 1, cytoplasmic OS=Homo sapiens GN=DYNLL1 PE=1 SV=1	4	0.0517428	0.66434	17.2306	16.8532	18.3301	17.2885	17.4286	17.2287	17.9438	17.2027
	TMED2_HUMAN	Transmembrane emp24 domain-containing protein 2 OS=Homo sapiens GN=TMED2 PE=1 SV=1	7	0.0520367	1.30046	18.752	19.076	18.4871	18.9302	18.7674	18.8515	18.2255	18.8904
	RAP1B_HUMAN	Ras-related protein Rap-1b OS=Homo sapiens GN=RAP1B PE=1 SV=1;sp	3	0.0521819	1.09133	20.6532	20.8361	20.4496	20.6387	20.822	20.8375	20.0232	20.14
	GRSF1_HUMAN	G-rich sequence factor 1 OS=Homo sapiens GN=GRSF1 PE=1 SV=3	11	0.0521855	0.754952	18.4171	18.0797	18.6598	17.8796	18.853	18.671	18.7169	18.3943
	GPM6B_HUMAN	Neuronal membrane glycoprotein M6-b OS=Homo sapiens GN=GPM6B PE=1 SV=2	2	0.0522589	0.523965	17.3766	16.6755	18.077	16.6765	16.0836	14.65	16.3258	16.1313
	CD59_HUMAN	CD59 glycoprotein OS=Homo sapiens GN=CD59 PE=1 SV=1	4	0.0523287	0.694379	18.6521	17.7174	18.3902	18.1784	18.2338	17.9423	18.0295	17.3627
	HIG1A_HUMAN	HIG1 domain family member 1A, mitochondrial OS=Homo sapiens GN=HIGD1A PE=1 SV=1	3	0.0529578	0.712406	16.2363	15.4459	16.5604	16.4957	16.6422	16.1882	17.0545	16.4067
	PTN1_HUMAN	Tyrosine-protein phosphatase non-receptor type 1 OS=Homo sapiens GN=PTPN1 PE=1 SV=1	25	0.0532721	1.20455	20.7839	21.0185	20.7393	20.957	20.862	20.9695	20.759	21.2731
	PSD11_HUMAN	26S proteasome non-ATPase regulatory subunit 11 OS=Homo sapiens GN=PSMD11 PE=1 SV=3	13	0.0538766	0.815456	18.5177	18.4073	18.7029	18.2232	18.3597	17.9231	18.2624	18.1119
	A4_PANTR	Amyloid beta A4 protein OS=Pan troglodytes GN=APP PE=2 SV=1;sp	3	0.0538927	0.382523	15.0689	13.9046	15.1787	14.2677	15.3341	14.5747	15.8639	13.1532
	NOP16_HUMAN	Nucleolar protein 16 OS=Homo sapiens GN=NOP16 PE=1 SV=2	4	0.0540605	1.23946	16.5492	16.6694	15.3321	15.5613	16.5086	16.8079	16.3401	16.9303
	HYOU1_HUMAN	Hypoxia up-regulated protein 1 OS=Homo sapiens GN=HYOU1 PE=1 SV=1	37	0.0540929	1.22829	21.2381	21.3683	21.1062	21.2386	21.1186	21.5495	21.1958	21.6888
	SC22B_HUMAN	Vesicle-trafficking protein SEC22b OS=Homo sapiens GN=SEC22B PE=1 SV=4	14	0.0540978	1.2286	20.5706	20.7711	20.1876	20.6757	20.558	20.6327	20.2476	20.6723
	RBM4_HUMAN	RNA-binding protein 4 OS=Homo sapiens GN=RBM4 PE=1 SV=1	4	0.0541116	0.496113	16.809	16.5683	17.2126	16.5165	16.7793	15.2982	17.7215	16.0943
	DDX60_HUMAN	Probable ATP-dependent RNA helicase DDX60 OS=Homo sapiens GN=DDX60 PE=1 SV=3	5	0.054606	3.89993	14.0303	16.0145	13.8047	14.035	13.7042	16.0544	12.9184	16.2077
	NDUV1_HUMAN	NADH dehydrogenase [ubiquinone] flavoprotein 1, mitochondrial OS=Homo sapiens GN=NDUFV1 PE=1 SV=4	8	0.0551938	0.600313	16.6158	16.3196	18.0356	16.6124	17.7527	17.1584	17.609	16.9779
	F120A_HUMAN	Constitutive coactivator of PPAR-gamma-like protein 1 OS=Homo sapiens GN=FAM120A PE=1 SV=2	10	0.0551963	1.42769	15.8509	16.4256	16.4974	17.3685	16.5831	16.6424	16.6662	17.2159
	PP1B_HUMAN	Serine/threonine-protein phosphatase PP1-beta catalytic subunit OS=Homo sapiens GN=PPP1CB PE=1 SV=3	6	0.0553758	0.801412	20.414	20.0599	20.3648	19.8387	20.0485	20.0207	20.206	19.8365
	FUCO2_HUMAN	Plasma alpha-L-fucosidase OS=Homo sapiens GN=FUCA2 PE=1 SV=2	2	0.0554204	0.3014	16.3296	16.1259	16.4987	14.9143	15.9382	13.1356	15.5054	13.1752
	ADT2_HUMAN	ADP/ATP translocase 2 OS=Homo sapiens GN=SLC25A5 PE=1 SV=7	12	0.0555098	1.20639	21.948	22.0891	21.7147	22.2326	21.6821	21.8239	21.2575	21.5395
	ANO6_HUMAN	Anoctamin-6 OS=Homo sapiens GN=ANO6 PE=1 SV=2	2	0.0555559	1.61593	14.1585	14.4299	14.0864	14.4471	13.81	14.722	13.7656	14.991
	SDC1_HUMAN	Syndecan-1 OS=Homo sapiens GN=SDC1 PE=1 SV=3	3	0.0558136	0.284252	15.8436	14.9273	14.7519	11.3582	15.0071	14.1412	15.1372	13.054
	LYRIC_HUMAN	Protein LYRIC OS=Homo sapiens GN=MTDH PE=1 SV=2	14	0.0560067	0.673859	18.7745	17.8853	18.2655	18.2363	18.7761	18.0542	19.0679	18.4304
	CP27A_HUMAN	Sterol 26-hydroxylase, mitochondrial OS=Homo sapiens GN=CYP27A1 PE=1 SV=1	2	0.0560738	0.493332	14.7414	14.2881	15.1196	13.9108	14.2318	13.7047	14.9285	13.0403
	MA2B1_HUMAN	Lysosomal alpha-mannosidase OS=Homo sapiens GN=MAN2B1 PE=1 SV=3	7	0.0568211	0.605389	16.6863	15.8089	17.5135	16.2994	17.2557	16.5219	16.8175	16.7466
	MY18A_HUMAN	Unconventional myosin-XVIIIa OS=Homo sapiens GN=MYO18A PE=1 SV=3	3	0.0570939	0.509997	13.7763	13.5068	13.7024	12.3057	14.1278	12.5004	14.6893	14.0972
	ZCCHV_HUMAN	Zinc finger CCCH-type antiviral protein 1 OS=Homo sapiens GN=ZC3HAV1 PE=1 SV=3	16	0.0575811	1.31299	17.9213	18.5345	17.8441	18.4016	18.1408	18.1742	18.1456	18.513
	MA2A1_HUMAN	Alpha-mannosidase 2 OS=Homo sapiens GN=MAN2A1 PE=1 SV=2	21	0.0576952	0.682733	18.6299	18.5665	18.5436	17.8369	18.9307	18.0049	18.7346	18.2281
	E41L2_HUMAN	Band 4.1-like protein 2 OS=Homo sapiens GN=EPB41L2 PE=1 SV=1	39	0.0578136	1.25191	20.3008	20.5511	20.0481	20.6927	20.4148	20.5857	20.5236	20.7543
	NONO_HUMAN	Non-POU domain-containing octamer-binding protein OS=Homo sapiens GN=NONO PE=1 SV=4	31	0.0581889	0.834925	22.2278	21.8751	22.2626	22.254	22.0635	21.6668	22.2075	21.9244
	HACD3_HUMAN	Very-long-chain (3R)-3-hydroxyacyl-CoA dehydratase 3 OS=Homo sapiens GN=HACD3 PE=1 SV=2	11	0.0582613	1.41077	20.2264	20.4907	19.6644	19.9799	20.3644	20.785	19.7435	20.7289
	CLH1_HUMAN	Clathrin heavy chain 1 OS=Homo sapiens GN=CLTC PE=1 SV=5	79	0.058327	0.835263	22.8626	22.6425	23.0074	22.6269	22.9065	22.4987	22.8074	22.7772
	PABP4_HUMAN	Polyadenylate-binding protein 4 OS=Homo sapiens GN=PABPC4 PE=1 SV=1	8	0.0585626	1.6141	15.3432	16.2734	16.808	17.5804	16.9415	16.9574	16.3216	17.366
	PYC_HUMAN	Pyruvate carboxylase, mitochondrial OS=Homo sapiens GN=PC PE=1 SV=2	23	0.0586044	1.15154	18.5397	18.6985	18.6487	18.8904	18.4528	18.4977	18.3386	18.7076
	SYEP_HUMAN	Bifunctional glutamate/proline--tRNA ligase OS=Homo sapiens GN=EPRS PE=1 SV=5	25	0.0586773	0.880698	18.4584	18.3055	18.7568	18.4115	18.5915	18.4048	18.5901	18.5419
	ACSL1_HUMAN	Long-chain-fatty-acid--CoA ligase 1 OS=Homo sapiens GN=ACSL1 PE=1 SV=1	16	0.0594183	1.22779	18.193	18.4906	18.5607	18.5811	18.1564	18.5337	17.9691	18.4582
	MMP14_HUMAN	Matrix metalloproteinase-14 OS=Homo sapiens GN=MMP14 PE=1 SV=3	2	0.0595265	0.223347	15.5917	14.8796	16.6371	14.8634	16.431	14.457	15.9806	11.7899
	RCN2_HUMAN	Reticulocalbin-2 OS=Homo sapiens GN=RCN2 PE=1 SV=1	14	0.059742	1.39668	19.5623	19.9011	19.5576	19.6463	19.5671	20.3205	19.547	20.2941
	OAS3_HUMAN	2-5-oligoadenylate synthase 3 OS=Homo sapiens GN=OAS3 PE=1 SV=3	7	0.060381	4.01901	15.7584	16.8629	14.9621	15.7829	15.1501	17.4331	13.5444	17.3634
	ODR4_HUMAN	Protein odr-4 homolog OS=Homo sapiens GN=ODR4 PE=1 SV=1	7	0.0609509	1.33922	15.73	16.2612	16.5355	16.7293	16.4512	16.6338	16.3591	17.1371
	1A34_HUMAN	HLA class I histocompatibility antigen, A-34 alpha chain OS=Homo sapiens GN=HLA-A PE=1 SV=1;sp	0	0.0612788	1.26855	21.3296	21.5678	21.4611	22.1542	21.8088	22.0597	21.9142	22.1048
	GSTM3_HUMAN	Glutathione S-transferase Mu 3 OS=Homo sapiens GN=GSTM3 PE=1 SV=3	8	0.061641	1.45896	16.9185	17.5431	17.0285	17.3122	16.6399	17.6804	17.1115	17.3424
	BI1_HUMAN	Bax inhibitor 1 OS=Homo sapiens GN=TMBIM6 PE=1 SV=2	2	0.0624137	0.423314	14.7912	13.3844	13.8428	11.5238	13.9335	12.9809	13.2081	12.9259
	SCO1_HUMAN	Protein SCO1 homolog, mitochondrial OS=Homo sapiens GN=SCO1 PE=1 SV=1	2	0.062884	1.62537	13.8733	14.0512	14.4013	14.8006	14.2816	15.3799	13.1079	14.2355
	SERPH_HUMAN	Serpin H1 OS=Homo sapiens GN=SERPINH1 PE=1 SV=2	24	0.0633432	0.929207	21.411	21.3142	21.6926	21.4877	21.5787	21.484	21.56	21.5327
	FLOT1_HUMAN	Flotillin-1 OS=Homo sapiens GN=FLOT1 PE=1 SV=3	19	0.0634147	0.736267	19.4342	19.07	19.6282	19.5105	19.457	19.027	19.7494	18.8945
	GPC4_HUMAN	Glypican-4 OS=Homo sapiens GN=GPC4 PE=1 SV=4	10	0.0635038	0.805201	18.8432	18.3017	18.9205	18.4661	18.9021	18.7672	19.1202	19.0007
	RAB32_HUMAN	Ras-related protein Rab-32 OS=Homo sapiens GN=RAB32 PE=1 SV=3	9	0.0635302	0.924609	17.7368	17.6068	17.4189	17.287	17.4368	17.2488	17.7086	17.7062
	ABCB7_HUMAN	ATP-binding cassette sub-family B member 7, mitochondrial OS=Homo sapiens GN=ABCB7 PE=1 SV=2	19	0.0636034	1.29886	18.1377	18.8795	18.6396	18.7787	18.5162	18.8953	18.5016	18.7506
	FBRL_HUMAN	rRNA 2-O-methyltransferase fibrillarin OS=Homo sapiens GN=FBL PE=1 SV=2	16	0.0636151	1.14029	19.8666	19.9027	19.6873	20.037	19.9056	20.1286	19.7932	19.9421
	COA3_HUMAN	Cytochrome c oxidase assembly factor 3 homolog, mitochondrial OS=Homo sapiens GN=COA3 PE=1 SV=1	3	0.0639823	0.823946	17.1659	16.9762	17.4798	17.3227	17.3023	16.7324	17.3413	17.1406
	CP51A_HUMAN	Lanosterol 14-alpha demethylase OS=Homo sapiens GN=CYP51A1 PE=1 SV=3	15	0.0641003	0.649765	18.5536	18.047	18.4866	17.2407	18.7192	18.4782	18.8561	18.3617
	MYH10_HUMAN	Myosin-10 OS=Homo sapiens GN=MYH10 PE=1 SV=3	31	0.0641594	0.902342	19.4932	19.3591	19.5644	19.4785	19.7787	19.4803	19.8415	19.7669
	SC23A_HUMAN	Protein transport protein Sec23A OS=Homo sapiens GN=SEC23A PE=1 SV=2	3	0.0644629	1.25842	14.3794	14.5859	14.4475	14.9763	14.8601	15.3837	15.6249	15.6925
	ANO10_HUMAN	Anoctamin-10 OS=Homo sapiens GN=ANO10 PE=1 SV=2	6	0.0644674	1.33063	15.8397	16.2073	15.9393	16.5366	16.0892	16.1127	16.0248	16.685
	RS5_HUMAN	40S ribosomal protein S5 OS=Homo sapiens GN=RPS5 PE=1 SV=4	10	0.0645431	0.784612	19.0382	18.467	19.3052	18.8523	19.1425	18.771	19.481	19.4768
	NDUS3_HUMAN	NADH dehydrogenase [ubiquinone] iron-sulfur protein 3, mitochondrial OS=Homo sapiens GN=NDUFS3 PE=1 SV=1	14	0.0650849	0.783739	19.3259	18.994	19.4105	18.7274	19.403	19.0987	19.0317	18.9447
	ZMYM3_HUMAN	Zinc finger MYM-type protein 3 OS=Homo sapiens GN=ZMYM3 PE=1 SV=2	3	0.0653537	0.266915	15.541	11.8726	14.7519	12.5798	15.2368	14.0777	14.3083	13.6857
	EED_HUMAN	Polycomb protein EED OS=Homo sapiens GN=EED PE=1 SV=2	3	0.0654531	0.653056	16.3248	15.4808	16.4205	15.4938	16.2661	15.5585	16.1235	16.143
	PLSI_HUMAN	Plastin-1 OS=Homo sapiens GN=PLS1 PE=1 SV=2	1	0.0654983	0.438415	13.3486	12.4988	15.124	13.0898	12.2121	12.0315	15.3011	13.6072
	NOC3L_HUMAN	Nucleolar complex protein 3 homolog OS=Homo sapiens GN=NOC3L PE=1 SV=1	7	0.0661241	1.43639	17	17.4301	16.1488	17.1254	17.2378	17.326	16.5669	17.1617
	SYFA_HUMAN	Phenylalanine--tRNA ligase alpha subunit OS=Homo sapiens GN=FARSA PE=1 SV=3	5	0.0662628	1.35273	16.619	16.6878	15.9264	16.3936	15.9613	16.3495	15.9878	16.807
	RAB9A_HUMAN	Ras-related protein Rab-9A OS=Homo sapiens GN=RAB9A PE=1 SV=1	5	0.0662903	2.11757	16.268	16.5225	16.1981	16.8407	16.267	17.7893	15.6135	17.5237
	MA1B1_HUMAN	Endoplasmic reticulum mannosyl-oligosaccharide 1,2-alpha-mannosidase OS=Homo sapiens GN=MAN1B1 PE=1 SV=2	3	0.0665503	0.374981	15.1988	15.145	16.387	14.7723	16.2248	13.7562	16.5337	15.0103
	PACN3_HUMAN	Protein kinase C and casein kinase substrate in neurons protein 3 OS=Homo sapiens GN=PACSIN3 PE=1 SV=2	6	0.0668559	1.28409	16.891	16.9366	16.57	16.8287	16.2236	16.7879	16.5759	17.1502
	SMD1_HUMAN	Small nuclear ribonucleoprotein Sm D1 OS=Homo sapiens GN=SNRPD1 PE=1 SV=1	3	0.0673364	0.864505	20.8712	20.812	20.4074	20.1207	20.7633	20.3825	20.1651	20.0515
	B3GA3_HUMAN	Galactosylgalactosylxylosylprotein 3-beta-glucuronosyltransferase 3 OS=Homo sapiens GN=B3GAT3 PE=1 SV=2	4	0.067355	0.34262	15.4388	15.4946	15.6	13.7463	14.6441	12.1903	15.1959	13.2663
	RPF2_HUMAN	Ribosome production factor 2 homolog OS=Homo sapiens GN=RPF2 PE=1 SV=2	8	0.0676317	1.39045	17.4845	18.0103	16.797	17.6609	17.746	17.7836	17.5328	18.0077
	GSLG1_HUMAN	Golgi apparatus protein 1 OS=Homo sapiens GN=GLG1 PE=1 SV=2	13	0.0678313	0.651709	18.3619	17.6359	18.4564	17.3433	18.3807	17.7961	18.2687	18.2216
	PTK7_HUMAN	Inactive tyrosine-protein kinase 7 OS=Homo sapiens GN=PTK7 PE=1 SV=2	15	0.0684495	0.849506	18.0908	17.8123	18.3291	17.9733	18.2765	17.9563	18.3405	18.3538
	CHERP_HUMAN	Calcium homeostasis endoplasmic reticulum protein OS=Homo sapiens GN=CHERP PE=1 SV=3	7	0.0684857	0.637288	16.8522	16.6701	17.1797	16.6274	16.672	16.1022	16.9552	15.6594
	UTP4_HUMAN	U3 small nucleolar RNA-associated protein 4 homolog OS=Homo sapiens GN=UTP4 PE=1 SV=1	7	0.0687053	1.25359	16.7358	16.9172	16.555	16.6278	16.6072	17.1211	16.5018	17.038
	AAAT_HUMAN	Neutral amino acid transporter B(0) OS=Homo sapiens GN=SLC1A5 PE=1 SV=2	12	0.0690144	1.19034	20.608	20.7605	20.4145	20.7969	20.4727	20.52	20.5702	20.9935
	SYIC_HUMAN	Isoleucine--tRNA ligase, cytoplasmic OS=Homo sapiens GN=IARS PE=1 SV=2	15	0.0694512	0.72744	18.2976	18.3275	18.4779	17.8321	18.5235	17.8444	18.7067	18.1653
	FPRP_HUMAN	Prostaglandin F2 receptor negative regulator OS=Homo sapiens GN=PTGFRN PE=1 SV=2	16	0.0695889	0.748582	18.3532	17.7783	18.5452	17.796	18.2549	17.9837	18.0322	17.9565
	RCN1_HUMAN	Reticulocalbin-1 OS=Homo sapiens GN=RCN1 PE=1 SV=1	18	0.0697124	1.17516	20.4106	20.45	20.2253	20.5493	20.3483	20.7626	20.6306	20.7842
	WDR75_HUMAN	WD repeat-containing protein 75 OS=Homo sapiens GN=WDR75 PE=1 SV=1	5	0.0697301	1.47538	16.4382	16.4891	15.808	16.2646	16.1845	16.9239	15.7651	16.7625
	FEN1_HUMAN	Flap endonuclease 1 OS=Homo sapiens GN=FEN1 PE=1 SV=1	4	0.0700003	0.421265	14.1699	14.269	15.7076	14.1455	14.8228	13.0943	16.2568	14.4594
	PTSS2_HUMAN	Phosphatidylserine synthase 2 OS=Homo sapiens GN=PTDSS2 PE=1 SV=1	6	0.070648	1.23173	16.391	16.8499	16.0489	16.5593	16.4945	16.5537	17.0755	17.2496
	HMGB2_HUMAN	High mobility group protein B2 OS=Homo sapiens GN=HMGB2 PE=1 SV=2	7	0.070648	0.931605	17.921	17.8301	18.0905	18.0753	18.0906	17.9841	18.4498	18.2536
	TM209_HUMAN	Transmembrane protein 209 OS=Homo sapiens GN=TMEM209 PE=1 SV=2	5	0.0707669	1.57718	15.1645	16.2804	16.0442	16.4768	16.359	16.4535	15.8758	16.8623
	CDC16_HUMAN	Cell division cycle protein 16 homolog OS=Homo sapiens GN=CDC16 PE=1 SV=2	2	0.0709807	0.700982	14.7853	14.3233	14.2175	14.2111	14.2518	13.5082	14.7144	13.8762
	PLOD3_HUMAN	Procollagen-lysine,2-oxoglutarate 5-dioxygenase 3 OS=Homo sapiens GN=PLOD3 PE=1 SV=1	22	0.0713493	0.806444	19.1485	18.9214	19.5896	19.1198	19.5963	19.0804	19.4101	19.3815
	SYLC_HUMAN	Leucine--tRNA ligase, cytoplasmic OS=Homo sapiens GN=LARS PE=1 SV=2	25	0.0713888	0.818757	19.1586	18.8812	18.8895	18.8128	19.3077	18.7299	19.002	18.7799
	VATC1_HUMAN	V-type proton ATPase subunit C 1 OS=Homo sapiens GN=ATP6V1C1 PE=1 SV=4	2	0.0714644	3.49722	12.1274	12.469	11.4132	12.9389	11.9279	13.7476	11.9655	15.5033
	TAOK1_HUMAN	Serine/threonine-protein kinase TAO1 OS=Homo sapiens GN=TAOK1 PE=1 SV=1;sp	2	0.0715649	1.63075	13.4918	13.6273	12.2288	13.5552	13.0353	13.923	13.3026	13.7752
	MIRO2_HUMAN	Mitochondrial Rho GTPase 2 OS=Homo sapiens GN=RHOT2 PE=1 SV=2	4	0.0720112	0.509745	16.0292	16.0259	17.1525	16.1058	16.5895	14.8711	17.2244	16.1042
	NT5D2_HUMAN	5-nucleotidase domain-containing protein 2 OS=Homo sapiens GN=NT5DC2 PE=1 SV=1	13	0.0722387	0.562056	18.1149	16.9769	18.5172	17.0426	18.1205	17.4842	17.8407	17.7647
	NCAM1_HUMAN	Neural cell adhesion molecule 1 OS=Homo sapiens GN=NCAM1 PE=1 SV=3	11	0.0724136	0.806127	17.8047	17.4177	18.246	18.0953	17.7969	17.1974	18.2054	18.0989
	SYFM_HUMAN	Phenylalanine--tRNA ligase, mitochondrial OS=Homo sapiens GN=FARS2 PE=1 SV=1	3	0.0730634	0.630709	15.687	15.5274	15.2	14.2377	15.5379	15.191	15.3476	14.1566
	RENT1_HUMAN	Regulator of nonsense transcripts 1 OS=Homo sapiens GN=UPF1 PE=1 SV=2	6	0.0730752	0.45909	15.4503	15.5266	16.8045	15.4475	16.3676	14.5386	16.8705	15.4877
	MFGM_HUMAN	Lactadherin OS=Homo sapiens GN=MFGE8 PE=1 SV=2	2	0.0733871	0.556266	13.3329	13.2726	14.3014	12.7598	13.0838	12.3764	14.8469	13.7716
	RS7_HUMAN	40S ribosomal protein S7 OS=Homo sapiens GN=RPS7 PE=1 SV=1	11	0.0734091	0.66997	19.7163	19.4994	19.7736	19.5744	20.0481	19.0918	20.1588	19.22
	TM9S4_HUMAN	Transmembrane 9 superfamily member 4 OS=Homo sapiens GN=TM9SF4 PE=1 SV=2	6	0.0743036	1.92156	16.2813	16.9677	14.9951	16.8887	16.7138	16.9491	15.8963	16.8501
	PALLD_HUMAN	Palladin OS=Homo sapiens GN=PALLD PE=1 SV=3	5	0.0744698	1.87686	17.2664	17.3884	16.5449	18.1578	17.6146	18.2094	17.1242	18.4278
	DKC1_HUMAN	H/ACA ribonucleoprotein complex subunit 4 OS=Homo sapiens GN=DKC1 PE=1 SV=3	15	0.0759486	1.41337	17.7221	18.5767	17.5975	18.3231	18.4681	18.4844	18.1577	18.5577
	LEG9_HUMAN	Galectin-9 OS=Homo sapiens GN=LGALS9 PE=1 SV=2	2	0.076257	3.06998	13.2694	13.3288	12.1891	15.088	13.0229	15.1851	12.0432	13.3955
	BRX1_HUMAN	Ribosome biogenesis protein BRX1 homolog OS=Homo sapiens GN=BRIX1 PE=1 SV=2	7	0.0763924	1.1968	16.5704	17.0391	16.5708	16.8465	16.986	16.9834	16.8931	17.1881
	PX11B_HUMAN	Peroxisomal membrane protein 11B OS=Homo sapiens GN=PEX11B PE=1 SV=1	3	0.0764804	1.73313	13.2772	13.8146	13.9709	15.5741	13.5968	14.4252	14.0846	14.2891
	1B15_HUMAN	HLA class I histocompatibility antigen, B-15 alpha chain OS=Homo sapiens GN=HLA-B PE=1 SV=2;sp	0	0.0768511	1.38227	16.5842	16.935	16.4018	16.6704	16.8073	17.0644	16.6365	17.6281
	MDC1_HUMAN	Mediator of DNA damage checkpoint protein 1 OS=Homo sapiens GN=MDC1 PE=1 SV=3	15	0.0768706	1.35306	18.0932	18.0659	17.5206	18.1332	17.8386	18.5554	18.1112	18.5538
	LAT1_HUMAN	Large neutral amino acids transporter small subunit 1 OS=Homo sapiens GN=SLC7A5 PE=1 SV=2	6	0.0768971	1.55064	17.892	18.1037	16.952	18.2498	17.7515	18.1312	17.7178	18.36
	RSMN_HUMAN	Small nuclear ribonucleoprotein-associated protein N OS=Homo sapiens GN=SNRPN PE=1 SV=1;sp	7	0.0771152	0.726614	18.1475	18.1693	19.0825	18.2865	18.6481	18.054	18.4385	17.9638
	PI51A_HUMAN	Phosphatidylinositol 4-phosphate 5-kinase type-1 alpha OS=Homo sapiens GN=PIP5K1A PE=1 SV=1	3	0.0772076	1.75711	16.1182	16.1475	14.9139	16.3436	14.8402	15.9863	15.9592	16.6067
	VPP1_HUMAN	V-type proton ATPase 116 kDa subunit a isoform 1 OS=Homo sapiens GN=ATP6V0A1 PE=1 SV=3	8	0.0772467	1.2548	17.0095	17.3311	16.9671	17.6359	17.1789	17.2647	17.2337	17.4674
	MK67I_HUMAN	MKI67 FHA domain-interacting nucleolar phosphoprotein OS=Homo sapiens GN=NIFK PE=1 SV=1	7	0.0778144	1.62083	16.8654	17.0779	16.5532	16.914	16.527	17.3568	16.4085	17.7925
	AMPL_HUMAN	Cytosol aminopeptidase OS=Homo sapiens GN=LAP3 PE=1 SV=3	19	0.0778897	1.28837	19.1079	19.3025	19.4984	19.5674	19.022	19.6672	19.1743	19.7278
	HXK1_HUMAN	Hexokinase-1 OS=Homo sapiens GN=HK1 PE=1 SV=3	40	0.0783195	1.18335	21.6005	21.5863	21.3645	21.7885	21.4368	21.7012	21.1338	21.4311
	PRKRA_HUMAN	Interferon-inducible double-stranded RNA-dependent protein kinase activator A OS=Homo sapiens GN=PRKRA PE=1 SV=1	2	0.0783772	0.407644	13.4682	12.5084	14.3228	12.6074	12.2069	9.81145	12.271	12.1632
	RFOX2_HUMAN	RNA binding protein fox-1 homolog 2 OS=Homo sapiens GN=RBFOX2 PE=1 SV=3;sp	3	0.0784404	0.413996	12.972	12.075	15.3862	14.0426	13.0281	12.7483	15.3844	12.8156
	ATPG_HUMAN	ATP synthase subunit gamma, mitochondrial OS=Homo sapiens GN=ATP5C1 PE=1 SV=1	15	0.0787971	1.17168	20.6511	20.984	20.5427	20.9192	20.7293	20.7165	20.3382	20.5561
	MIC27_HUMAN	MICOS complex subunit MIC27 OS=Homo sapiens GN=APOOL PE=1 SV=1	7	0.0791954	1.49787	16.6527	17.1696	16.5584	17.6861	17.2393	17.2832	16.938	17.5812
	EHD2_HUMAN	EH domain-containing protein 2 OS=Homo sapiens GN=EHD2 PE=1 SV=2	11	0.0794749	0.714003	17.4329	17.425	17.7022	16.821	17.6677	17.0242	17.5673	17.1559
	TMEDA_HUMAN	Transmembrane emp24 domain-containing protein 10 OS=Homo sapiens GN=TMED10 PE=1 SV=2	11	0.0796489	1.2957	19.713	19.8783	19.5055	19.6926	19.7491	20.1087	19.3121	20.0951
	TMM97_HUMAN	Transmembrane protein 97 OS=Homo sapiens GN=TMEM97 PE=1 SV=1	4	0.0797756	1.87206	17.4165	18.0894	16.8292	16.9708	15.7331	17.5303	17.3363	18.343
	RS3A_HUMAN	40S ribosomal protein S3a OS=Homo sapiens GN=RPS3A PE=1 SV=2	16	0.0800203	0.742697	19.0366	18.5339	19.3882	19.4268	19.3458	18.8282	19.6862	18.9511
	MPPB_HUMAN	Mitochondrial-processing peptidase subunit beta OS=Homo sapiens GN=PMPCB PE=1 SV=2	11	0.0805842	0.672806	17.7067	17.4695	17.8503	17.6455	17.2825	16.5709	17.1943	16.0609
	TM201_HUMAN	Transmembrane protein 201 OS=Homo sapiens GN=TMEM201 PE=1 SV=1	7	0.0810737	1.18382	17.6189	17.7748	17.4997	17.6217	17.5118	17.6841	17.5384	18.0621
	SMC2_HUMAN	Structural maintenance of chromosomes protein 2 OS=Homo sapiens GN=SMC2 PE=1 SV=2	2	0.0817655	0.639418	14.6074	14.3886	14.2908	12.9308	14.9024	14.4907	15.3635	14.7734
	SPSY_HUMAN	Spermine synthase OS=Homo sapiens GN=SMS PE=1 SV=2	4	0.0818408	1.6958	16.1213	16.0263	15.3977	16.4776	16.3946	17.6086	16.4021	17.2511
	PTH2_HUMAN	Peptidyl-tRNA hydrolase 2, mitochondrial OS=Homo sapiens GN=PTRH2 PE=1 SV=1	6	0.0818578	1.25329	16.6995	17.3646	17.0875	17.1565	17.1351	17.4784	17.2639	17.4894
	DSRAD_HUMAN	Double-stranded RNA-specific adenosine deaminase OS=Homo sapiens GN=ADAR PE=1 SV=4	30	0.0820087	1.17271	19.9177	19.9389	19.8303	20.2264	19.6915	19.8344	19.5175	19.8768
	HIP1_HUMAN	Huntingtin-interacting protein 1 OS=Homo sapiens GN=HIP1 PE=1 SV=5	5	0.0824024	0.573262	14.4034	13.115	15.0514	13.8674	14.4927	14.5776	14.9834	14.1601
	GNAI2_HUMAN	Guanine nucleotide-binding protein G(i) subunit alpha-2 OS=Homo sapiens GN=GNAI2 PE=1 SV=3	14	0.0826875	0.871252	21.4195	21.0031	21.3951	21.2588	21.3675	21.18	21.3266	21.2714
	ORML1_HUMAN	ORM1-like protein 1 OS=Homo sapiens GN=ORMDL1 PE=1 SV=1;sp	1	0.0828648	1.38502	14.8985	15.1034	14.5764	15.575	15.1609	15.4036	15.0659	15.4993
	SMN_HUMAN	Survival motor neuron protein OS=Homo sapiens GN=SMN1 PE=1 SV=1	2	0.0847071	4.18196	13.4911	15.5447	14.7182	15.3453	11.2785	12.515	11.7079	16.0474
	CRTAP_HUMAN	Cartilage-associated protein OS=Homo sapiens GN=CRTAP PE=1 SV=1	11	0.0847149	0.766219	18.6393	18.6346	19.3868	18.6778	18.8471	18.5445	19.2712	18.751
	ALDH2_HUMAN	Aldehyde dehydrogenase, mitochondrial OS=Homo sapiens GN=ALDH2 PE=1 SV=2	21	0.0851471	0.870598	20.1387	19.8586	19.8536	19.7279	19.854	19.4799	19.5528	19.533
	EI24_HUMAN	Etoposide-induced protein 2.4 homolog OS=Homo sapiens GN=EI24 PE=1 SV=4	2	0.0855815	0.415247	14.0234	11.4667	13.2113	11.6426	13.1713	12.6514	13.5789	13.1525
	SYYC_HUMAN	Tyrosine--tRNA ligase, cytoplasmic OS=Homo sapiens GN=YARS PE=1 SV=4	2	0.085763	1.73255	14.1285	14.8959	13.4547	13.778	13.0151	13.4078	12.6729	14.3611
	SRP72_HUMAN	Signal recognition particle subunit SRP72 OS=Homo sapiens GN=SRP72 PE=1 SV=3	13	0.0862045	0.945478	18.019	17.925	17.8981	17.8518	17.9975	17.8325	18.0953	18.077
	ITPR3_HUMAN	Inositol 1,4,5-trisphosphate receptor type 3 OS=Homo sapiens GN=ITPR3 PE=1 SV=2	12	0.0863993	1.31868	17.0174	17.0811	16.6949	17.42	17.2676	17.4678	16.9944	17.6017
	UBXN4_HUMAN	UBX domain-containing protein 4 OS=Homo sapiens GN=UBXN4 PE=1 SV=2	7	0.0866702	0.477291	18.1985	18.0025	19.145	18.5223	18.7336	16.5956	19.1859	17.8745
	TP4A1_HUMAN	Protein tyrosine phosphatase type IVA 1 OS=Homo sapiens GN=PTP4A1 PE=1 SV=2	2	0.0866782	1.3663	12.781	13.509	12.6445	13.2495	13.009	12.9344	13.2524	13.7951
	PP1RA_HUMAN	Serine/threonine-protein phosphatase 1 regulatory subunit 10 OS=Homo sapiens GN=PPP1R10 PE=1 SV=1	9	0.086834	0.621923	17.2218	17.0202	17.4405	16.6121	17.2532	16.9368	17.0408	15.6464
	ARL8B_HUMAN	ADP-ribosylation factor-like protein 8B OS=Homo sapiens GN=ARL8B PE=1 SV=1	2	0.0870262	1.45768	17.4636	18.505	18.1396	18.8716	18.5295	18.5803	18.371	18.7214
	CKAP5_HUMAN	Cytoskeleton-associated protein 5 OS=Homo sapiens GN=CKAP5 PE=1 SV=3	20	0.087438	1.24127	17.8274	18.3234	17.337	17.4371	18.071	18.1652	17.6379	18.1948
	HMOX1_HUMAN	Heme oxygenase 1 OS=Homo sapiens GN=HMOX1 PE=1 SV=1	2	0.087577	2.93168	12.8136	15.8203	12.8202	12.8589	11.9215	13.1791	13.3915	15.2954
	UFL1_HUMAN	E3 UFM1-protein ligase 1 OS=Homo sapiens GN=UFL1 PE=1 SV=2	19	0.0877001	1.10714	18.6057	18.8317	18.8082	19.0395	19.042	19.0216	18.7904	18.9409
	PGRC1_HUMAN	Membrane-associated progesterone receptor component 1 OS=Homo sapiens GN=PGRMC1 PE=1 SV=3	12	0.0877162	1.17767	20.3279	20.3039	20.001	20.4289	20.1371	20.3999	20.1139	20.391
	TCRG1_HUMAN	Transcription elongation regulator 1 OS=Homo sapiens GN=TCERG1 PE=1 SV=2	4	0.0880501	0.928431	15.4051	15.27	15.3842	15.3722	15.0615	14.9916	15.4216	15.21
	EPN4_HUMAN	Clathrin interactor 1 OS=Homo sapiens GN=CLINT1 PE=1 SV=1	2	0.0888403	1.14736	14.1422	14.5297	14.7849	15.0107	14.6985	14.6981	14.9919	15.1724
	SF3B4_HUMAN	Splicing factor 3B subunit 4 OS=Homo sapiens GN=SF3B4 PE=1 SV=1	3	0.0888894	0.670906	16.4494	15.5624	16.4589	16.4218	16.4929	15.4631	16.6117	16.2623
	NPA1P_HUMAN	Nucleolar pre-ribosomal-associated protein 1 OS=Homo sapiens GN=URB1 PE=1 SV=4	4	0.0890738	0.540843	14.4484	14.0912	13.4234	13.2375	14.8902	13.4252	13.9807	12.4419
	E2AK2_HUMAN	Interferon-induced, double-stranded RNA-activated protein kinase OS=Homo sapiens GN=EIF2AK2 PE=1 SV=2	7	0.0892195	1.43381	17.1354	17.5141	16.7942	16.7869	17.0479	17.9554	16.8085	17.6092
	SGPL1_HUMAN	Sphingosine-1-phosphate lyase 1 OS=Homo sapiens GN=SGPL1 PE=1 SV=3	7	0.0892278	1.30572	17.2813	17.5312	16.8213	17.5163	17.3873	17.4025	17.0613	17.6405
	AFG32_HUMAN	AFG3-like protein 2 OS=Homo sapiens GN=AFG3L2 PE=1 SV=2	18	0.0894129	1.19158	18.5865	18.8068	18.7442	18.951	18.5278	18.5765	18.3975	18.9333
	RAB5B_HUMAN	Ras-related protein Rab-5B OS=Homo sapiens GN=RAB5B PE=1 SV=1	4	0.0895344	1.11038	17.4755	17.6454	17.5558	17.7631	17.8608	17.8359	17.6065	17.8584
	ARMC1_HUMAN	Armadillo repeat-containing protein 1 OS=Homo sapiens GN=ARMC1 PE=1 SV=1	4	0.0896954	0.616745	15.2019	15.3487	16.9877	16.0088	16.3937	15.4523	16.7894	15.7738
	MYO1C_HUMAN	Unconventional myosin-Ic OS=Homo sapiens GN=MYO1C PE=1 SV=4	35	0.0897367	0.855919	20.2887	20.2732	20.5625	20.3743	20.7573	20.3013	20.7063	20.4682
	HNRDL_HUMAN	Heterogeneous nuclear ribonucleoprotein D-like OS=Homo sapiens GN=HNRNPDL PE=1 SV=3	14	0.089809	0.799361	19.5312	19.2385	19.7875	19.4931	19.0205	18.9851	19.5823	18.9124
	ESYT2_HUMAN	Extended synaptotagmin-2 OS=Homo sapiens GN=ESYT2 PE=1 SV=1	19	0.0898607	1.12152	18.3551	18.4216	18.0028	18.2849	18.5205	18.8	18.4056	18.4394
	RRP8_HUMAN	Ribosomal RNA-processing protein 8 OS=Homo sapiens GN=RRP8 PE=1 SV=2	4	0.0898628	1.83274	15.3895	15.6151	15.0902	16.1937	15.5385	15.9369	14.4111	16.1796
	OGT1_HUMAN	UDP-N-acetylglucosamine--peptide N-acetylglucosaminyltransferase 110 kDa subunit OS=Homo sapiens GN=OGT PE=1 SV=3	5	0.0902402	0.629621	15.1055	14.2235	15.9322	15.1076	15.2312	15.357	15.9803	14.8913
	NDUAA_HUMAN	NADH dehydrogenase [ubiquinone] 1 alpha subcomplex subunit 10, mitochondrial OS=Homo sapiens GN=NDUFA10 PE=1 SV=1	6	0.0903192	0.725951	16.9982	16.7885	17.4539	17.3212	17.3348	16.3823	17.4663	16.913
	CHID1_HUMAN	Chitinase domain-containing protein 1 OS=Homo sapiens GN=CHID1 PE=1 SV=1	6	0.090872	1.38208	16.4937	16.7043	16.3392	16.5676	16.2187	17.2389	16.6395	17.0477
	NDUAD_HUMAN	NADH dehydrogenase [ubiquinone] 1 alpha subcomplex subunit 13 OS=Homo sapiens GN=NDUFA13 PE=1 SV=3	5	0.0909369	0.679719	18.1441	17.7062	18.7571	17.6163	18.4332	17.8324	18.0499	18.0015
	SFXN1_HUMAN	Sideroflexin-1 OS=Homo sapiens GN=SFXN1 PE=1 SV=4	16	0.091504	1.12926	20.5099	20.5581	20.6063	20.8468	20.6039	20.6706	20.4465	20.7926
	1433T_HUMAN	14-3-3 protein theta OS=Homo sapiens GN=YWHAQ PE=1 SV=1	9	0.0915272	1.39907	18.2691	18.2567	17.8879	18.2808	17.2142	18.1345	17.8748	18.5119
	NU214_HUMAN	Nuclear pore complex protein Nup214 OS=Homo sapiens GN=NUP214 PE=1 SV=2	9	0.0915756	2.20727	15.8911	16.7555	16.2185	16.3947	16.6148	17.7381	14.2224	16.6276
	ALG9_HUMAN	Alpha-1,2-mannosyltransferase ALG9 OS=Homo sapiens GN=ALG9 PE=1 SV=2	2	0.0915904	1.49299	15.1136	15.4459	14.7095	15.9589	15.5224	15.7058	15.4701	16.0178
	SQSTM_HUMAN	Sequestosome-1 OS=Homo sapiens GN=SQSTM1 PE=1 SV=1	12	0.0916558	0.796992	19.0109	18.5606	18.9526	18.3532	18.9601	18.9837	19.6036	19.3203
	TKT_HUMAN	Transketolase OS=Homo sapiens GN=TKT PE=1 SV=3	29	0.0918523	1.10873	20.7782	20.8896	21.182	21.2396	20.6749	21.003	21.1136	21.2122
	SF01_HUMAN	Splicing factor 1 OS=Homo sapiens GN=SF1 PE=1 SV=4	6	0.0918819	0.691309	15.9279	16.0295	16.9522	16.299	16.2831	15.5924	16.2588	15.3707
	RS15A_HUMAN	40S ribosomal protein S15a OS=Homo sapiens GN=RPS15A PE=1 SV=2	6	0.0920089	0.770111	18.5446	18.503	18.512	18.2445	18.9544	18.5308	18.9965	18.2217
	LSM2_HUMAN	U6 snRNA-associated Sm-like protein LSm2 OS=Homo sapiens GN=LSM2 PE=1 SV=1	2	0.0921022	0.155539	15.5447	15.1607	15.738	13.2933	15.2331	12.9945	15.4163	9.745
	RNPS1_HUMAN	RNA-binding protein with serine-rich domain 1 OS=Homo sapiens GN=RNPS1 PE=1 SV=1	7	0.0921977	1.18584	18.6455	18.9416	19.0219	19.3981	19.252	19.2006	18.8808	19.2434
	LETM1_HUMAN	LETM1 and EF-hand domain-containing protein 1, mitochondrial OS=Homo sapiens GN=LETM1 PE=1 SV=1	30	0.0925849	1.24451	20.4668	20.5757	20.07	20.6416	20.3967	20.4738	20.1467	20.6514
	WFS1_HUMAN	Wolframin OS=Homo sapiens GN=WFS1 PE=1 SV=2	9	0.0928731	1.36136	15.8464	16.5199	15.6974	16.4534	16.5268	16.4714	16.283	16.6892
	AP2A2_HUMAN	AP-2 complex subunit alpha-2 OS=Homo sapiens GN=AP2A2 PE=1 SV=2	18	0.0936138	0.817678	19.0546	18.8389	19.3143	18.6688	19.2774	19.1065	19.197	19.0676
	TFCP2_HUMAN	Alpha-globin transcription factor CP2 OS=Homo sapiens GN=TFCP2 PE=1 SV=2	3	0.0937109	1.67661	13.8022	15.3502	14.4668	15.0519	13.3552	14.1391	14.6383	14.7036
	SYAM_HUMAN	Alanine--tRNA ligase, mitochondrial OS=Homo sapiens GN=AARS2 PE=1 SV=1	16	0.0941803	0.826152	16.8016	16.6148	17.0481	17.0324	16.9962	16.4478	17.3842	17.0331
	LRC59_HUMAN	Leucine-rich repeat-containing protein 59 OS=Homo sapiens GN=LRRC59 PE=1 SV=1	18	0.0949205	1.1049	20.8809	20.862	20.6948	20.8405	20.6687	20.9337	20.8907	21.0747
	SMRC2_HUMAN	SWI/SNF complex subunit SMARCC2 OS=Homo sapiens GN=SMARCC2 PE=1 SV=1	11	0.0952248	0.85546	18.4179	17.9973	18.4034	18.1622	18.2135	18.2427	18.192	17.9236
	LIN7A_HUMAN	Protein lin-7 homolog A OS=Homo sapiens GN=LIN7A PE=1 SV=2	1	0.0957282	0.723427	14.6423	14.4251	15.2819	15.1963	14.7581	14.1281	15.3567	14.4213
	POP1_HUMAN	Ribonucleases P/MRP protein subunit POP1 OS=Homo sapiens GN=POP1 PE=1 SV=2	4	0.0958451	0.671511	14.6081	14.5034	15.4328	14.9541	15.385	14.1419	15.3795	14.908
	AKA12_HUMAN	A-kinase anchor protein 12 OS=Homo sapiens GN=AKAP12 PE=1 SV=4	2	0.0962764	2.40419	12.3426	13.1421	12.7234	15.5656	13.031	13.864	11.9388	12.5263
	RALA_HUMAN	Ras-related protein Ral-A OS=Homo sapiens GN=RALA PE=1 SV=1	7	0.096303	1.16836	19.4453	19.6289	19.4833	19.9166	19.6767	19.6655	19.6654	19.9576
	SPB1_HUMAN	pre-rRNA processing protein FTSJ3 OS=Homo sapiens GN=FTSJ3 PE=1 SV=2	14	0.0964651	1.38673	18.0784	18.2342	17.2485	18.2559	18.1292	18.3248	17.8456	18.3736
	LICH_HUMAN	Lysosomal acid lipase/cholesteryl ester hydrolase OS=Homo sapiens GN=LIPA PE=1 SV=2	2	0.0965273	0.648201	14.5114	14.3182	14.5454	13.4608	14.75	14.5974	14.2904	13.2188
	QCR8_HUMAN	Cytochrome b-c1 complex subunit 8 OS=Homo sapiens GN=UQCRQ PE=1 SV=4	5	0.0965362	1.9721	15.4255	17.3134	17.1539	18.0497	16.8709	18.0869	17.2308	17.15
	CYC_HUMAN	Cytochrome c OS=Homo sapiens GN=CYCS PE=1 SV=2	7	0.0969974	0.893945	19.0095	18.7162	18.9757	18.876	18.9487	18.6962	19.0643	19.0628
	CO6A2_HUMAN	Collagen alpha-2(VI) chain OS=Homo sapiens GN=COL6A2 PE=1 SV=4	2	0.0972725	0.462883	13.5612	13.2813	14.9716	13.5139	14.3657	13.9281	14.6728	12.4029
	CY1_HUMAN	Cytochrome c1, heme protein, mitochondrial OS=Homo sapiens GN=CYC1 PE=1 SV=3	9	0.0974586	1.27836	19.848	19.9949	19.7841	20.1993	19.6758	19.7807	19.1926	19.9426
	KRR1_HUMAN	KRR1 small subunit processome component homolog OS=Homo sapiens GN=KRR1 PE=1 SV=4	6	0.0976113	1.24475	16.67	16.8417	16.2959	16.3111	15.9427	16.5058	16.4422	16.9556
	PRDBP_HUMAN	Protein kinase C delta-binding protein OS=Homo sapiens GN=PRKCDBP PE=1 SV=3	5	0.0976855	0.632741	17.3813	17.3065	17.3865	17.0656	16.9418	15.9576	16.8746	15.6132
	SPCS1_HUMAN	Signal peptidase complex subunit 1 OS=Homo sapiens GN=SPCS1 PE=1 SV=4	2	0.097762	1.37282	17.7772	18.0053	17.4363	18.3711	17.9893	18.0654	17.7355	18.3251
	PUR6_HUMAN	Multifunctional protein ADE2 OS=Homo sapiens GN=PAICS PE=1 SV=3	6	0.0977687	1.06092	16.5675	16.746	16.9605	17.0556	16.5867	16.6468	16.9278	16.9354
	SNTB2_HUMAN	Beta-2-syntrophin OS=Homo sapiens GN=SNTB2 PE=1 SV=1	5	0.0979896	1.45697	15.3628	16.2365	17.2619	17.202	16.2624	17.1832	16.311	16.7482
	AP1M1_HUMAN	AP-1 complex subunit mu-1 OS=Homo sapiens GN=AP1M1 PE=1 SV=3	7	0.0981025	1.20956	16.6492	16.795	16.4984	16.7064	16.5534	16.6802	16.4374	17.0547
	PSMD7_HUMAN	26S proteasome non-ATPase regulatory subunit 7 OS=Homo sapiens GN=PSMD7 PE=1 SV=2	10	0.0982291	0.584891	17.0027	16.9171	17.9195	16.7014	17.126	16.7666	18.1511	16.7192
	RTN4_HUMAN	Reticulon-4 OS=Homo sapiens GN=RTN4 PE=1 SV=2	11	0.0983762	1.22871	21.1672	21.3299	21.2115	21.7025	21.3864	21.398	21.1833	21.7067
	DCAKD_HUMAN	Dephospho-CoA kinase domain-containing protein OS=Homo sapiens GN=DCAKD PE=1 SV=1	4	0.098578	1.72933	15.6596	15.7425	15.2831	15.7289	14.7077	16.3093	14.9827	16.0134
	RCC1_HUMAN	Regulator of chromosome condensation OS=Homo sapiens GN=RCC1 PE=1 SV=1	14	0.0989259	1.32607	19.7247	19.7345	18.9799	19.8212	19.136	19.5901	19.0287	19.3521
	WDR5_HUMAN	WD repeat-containing protein 5 OS=Homo sapiens GN=WDR5 PE=1 SV=1	4	0.0996093	0.731287	14.4278	14.1047	15.5875	15.5929	15.0756	14.1839	14.7117	14.115
	MOV10_HUMAN	Putative helicase MOV-10 OS=Homo sapiens GN=MOV10 PE=1 SV=2	4	0.099646	1.62066	14.1342	15.6067	14.4993	15.1015	14.6943	14.7303	14.7454	15.421
	CK5P3_HUMAN	CDK5 regulatory subunit-associated protein 3 OS=Homo sapiens GN=CDK5RAP3 PE=1 SV=2	12	0.100193	1.35324	17.6203	17.944	17.3648	17.6219	17.4095	17.5882	17.0543	18.0404
	SRP14_HUMAN	Signal recognition particle 14 kDa protein OS=Homo sapiens GN=SRP14 PE=1 SV=2	3	0.10105	1.28257	16.6923	16.7532	16.4908	16.6201	16.7569	17.3575	16.6633	17.3087
	RAD21_HUMAN	Double-strand-break repair protein rad21 homolog OS=Homo sapiens GN=RAD21 PE=1 SV=2	15	0.101129	0.790152	17.9081	17.7433	18.5477	18.2088	18.342	18.2358	18.4072	17.6579
	BOREA_HUMAN	Borealin OS=Homo sapiens GN=CDCA8 PE=1 SV=2	2	0.101144	0.36655	12.5693	12.3776	13.6147	12.6655	15.2751	12.1672	13.7743	12.2315
	PEX14_HUMAN	Peroxisomal membrane protein PEX14 OS=Homo sapiens GN=PEX14 PE=1 SV=1	4	0.101314	1.14496	16.8095	17.0167	17.0202	17.0982	16.8659	16.9348	16.8229	17.2501
	DAZP1_HUMAN	DAZ-associated protein 1 OS=Homo sapiens GN=DAZAP1 PE=1 SV=1	6	0.10174	0.748355	18.2929	17.6432	18.4314	18.1794	17.7056	17.7085	18.2769	17.5028
	NAMPT_HUMAN	Nicotinamide phosphoribosyltransferase OS=Homo sapiens GN=NAMPT PE=1 SV=1	5	0.10185	4.34507	15.8033	16.5043	14.4143	14.8277	13.9504	17.4102	13.1663	17.0696
	MCFD2_HUMAN	Multiple coagulation factor deficiency protein 2 OS=Homo sapiens GN=MCFD2 PE=1 SV=1	2	0.101893	1.74113	12.5549	12.9939	12.4901	13.0916	12.723	14.5393	13.3031	13.6463
	DYH5_HUMAN	Dynein heavy chain 5, axonemal OS=Homo sapiens GN=DNAH5 PE=1 SV=3	2	0.102115	3.31877	15.1031	15.2986	15.6202	17.7524	15.4504	16.4329	13.8419	17.4543
	QCR1_HUMAN	Cytochrome b-c1 complex subunit 1, mitochondrial OS=Homo sapiens GN=UQCRC1 PE=1 SV=3	23	0.102213	1.05221	20.6297	20.7578	20.8206	20.9402	20.6757	20.728	20.8287	20.8224
	CD97_HUMAN	CD97 antigen OS=Homo sapiens GN=CD97 PE=1 SV=4	7	0.102408	0.704963	18.1867	17.1422	18.1227	17.9536	18.0912	17.9524	18.3711	17.706
	RS4X_HUMAN	40S ribosomal protein S4, X isoform OS=Homo sapiens GN=RPS4X PE=1 SV=2	20	0.102447	0.800872	19.4372	19.3419	19.7857	19.6811	19.7197	19.0504	19.9967	19.5844
	CDKAL_HUMAN	Threonylcarbamoyladenosine tRNA methylthiotransferase OS=Homo sapiens GN=CDKAL1 PE=1 SV=1	2	0.102521	0.628434	14.2037	14.23	14.5225	14	14.4785	13.1284	14.9345	14.1001
	GOSR2_HUMAN	Golgi SNAP receptor complex member 2 OS=Homo sapiens GN=GOSR2 PE=1 SV=2	8	0.102703	1.44022	18.0268	18.3691	17.2457	18.4103	18.1727	18.2835	18.1006	18.588
	TOP1_HUMAN	DNA topoisomerase 1 OS=Homo sapiens GN=TOP1 PE=1 SV=2	36	0.103087	1.32968	20.9114	20.9708	19.9662	20.6628	20.7295	20.8826	20.3469	21.0821
	SPCS2_HUMAN	Signal peptidase complex subunit 2 OS=Homo sapiens GN=SPCS2 PE=1 SV=3	12	0.103134	1.31637	18.9038	19.2258	18.6375	19.3612	19.0763	19.0254	18.8361	19.4275
	RRAS_HUMAN	Ras-related protein R-Ras OS=Homo sapiens GN=RRAS PE=1 SV=1	6	0.103382	0.722618	17.4657	17.2033	17.87	16.8123	17.9162	17.758	17.9536	17.5571
	HS74L_HUMAN	Heat shock 70 kDa protein 4L OS=Homo sapiens GN=HSPA4L PE=1 SV=3	8	0.103808	1.48706	16.5323	17.4108	17.143	17.1147	16.6796	17.7441	17.2731	17.6484
	1C08_HUMAN	HLA class I histocompatibility antigen, Cw-8 alpha chain OS=Homo sapiens GN=HLA-C PE=1 SV=1;sp	1	0.104167	14.7856	10.2306	12.3696	8.25498	13.2795	7.86833	15.8974	11.1923	11.5442
	AASS_HUMAN	Alpha-aminoadipic semialdehyde synthase, mitochondrial OS=Homo sapiens GN=AASS PE=1 SV=1	13	0.104595	1.52848	17.7881	17.8746	17.72	17.9655	17.2196	18.4159	17.432	18.3521
	MPPA_HUMAN	Mitochondrial-processing peptidase subunit alpha OS=Homo sapiens GN=PMPCA PE=1 SV=2	14	0.104647	0.784914	17.8923	17.7199	18.3685	17.8704	17.9473	17.9171	18.1021	17.4052
	GDAP1_HUMAN	Ganglioside-induced differentiation-associated protein 1 OS=Homo sapiens GN=GDAP1 PE=1 SV=3	3	0.10499	2.79993	15.1729	15.5508	14.3595	15.9098	15.1273	15.863	12.6316	15.9093
	TAM41_HUMAN	Phosphatidate cytidylyltransferase, mitochondrial OS=Homo sapiens GN=TAMM41 PE=1 SV=2	4	0.105428	1.37648	16.1307	16.9246	16.8032	16.9928	16.6809	16.7253	16.5504	17.3663
	PCBP1_HUMAN	Poly(rC)-binding protein 1 OS=Homo sapiens GN=PCBP1 PE=1 SV=2	6	0.105661	0.823173	18.1083	17.6269	18.3189	18.1603	17.8463	17.8515	18.3738	17.8858
	SYMPK_HUMAN	Symplekin OS=Homo sapiens GN=SYMPK PE=1 SV=2	10	0.105866	1.27174	16.3447	17.1223	16.7899	17.1237	17.1057	17.213	17.1863	17.3548
	IMA7_HUMAN	Importin subunit alpha-7 OS=Homo sapiens GN=KPNA6 PE=1 SV=1;sp	5	0.107122	0.908909	16.1618	16.0019	16.1552	16.1922	16.2097	16.0197	16.4012	16.1629
	ERGI2_HUMAN	Endoplasmic reticulum-Golgi intermediate compartment protein 2 OS=Homo sapiens GN=ERGIC2 PE=1 SV=2	3	0.107277	1.39917	16.0067	16.684	15.6565	15.6247	15.8291	16.1692	15.5633	16.5159
	NEMP1_HUMAN	Nuclear envelope integral membrane protein 1 OS=Homo sapiens GN=NEMP1 PE=1 SV=2	3	0.107332	0.91616	15.8745	15.6777	15.181	15.2118	16.3058	16.094	15.9767	15.8493
	MUTA_HUMAN	Methylmalonyl-CoA mutase, mitochondrial OS=Homo sapiens GN=MUT PE=1 SV=4	22	0.107684	1.17202	19.6871	19.8768	19.6747	19.9235	19.7572	19.7513	19.2376	19.721
	RM51_HUMAN	39S ribosomal protein L51, mitochondrial OS=Homo sapiens GN=MRPL51 PE=1 SV=1	2	0.107755	0.789481	15.3038	15.2469	15.6608	15.51	15.9726	15.2513	15.6132	15.178
	MCM5_HUMAN	DNA replication licensing factor MCM5 OS=Homo sapiens GN=MCM5 PE=1 SV=5	10	0.107884	1.32204	17.4558	17.5372	16.5676	17.3994	17.2646	17.408	17.3017	17.8562
	FKB11_HUMAN	Peptidyl-prolyl cis-trans isomerase FKBP11 OS=Homo sapiens GN=FKBP11 PE=1 SV=1	2	0.107905	2.6568	10.7761	13.496	12.7012	14.075	14.2251	16.0217	11.7867	11.5352
	RPAC1_HUMAN	DNA-directed RNA polymerases I and III subunit RPAC1 OS=Homo sapiens GN=POLR1C PE=1 SV=1	3	0.108059	2.05385	14.4432	14.5083	14.174	14.6784	14.2296	15.7517	13.2318	15.2935
	SRS11_HUMAN	Serine/arginine-rich splicing factor 11 OS=Homo sapiens GN=SRSF11 PE=1 SV=1	5	0.108062	0.598917	16.6365	16.7731	17.4674	16.7642	16.9187	15.9348	17.6489	16.2411
	NEP1_HUMAN	Ribosomal RNA small subunit methyltransferase NEP1 OS=Homo sapiens GN=EMG1 PE=1 SV=4	3	0.108767	1.23995	15.5339	16.1593	15.824	16.2718	15.8552	15.9907	16.0218	16.0543
	GGH_HUMAN	Gamma-glutamyl hydrolase OS=Homo sapiens GN=GGH PE=1 SV=2	13	0.109179	0.88407	20.1165	20.106	19.9884	19.6213	20.0037	19.909	20.4093	20.1707
	TM222_HUMAN	Transmembrane protein 222 OS=Homo sapiens GN=TMEM222 PE=1 SV=2	2	0.109201	6.94695	12.9048	14.2046	12.5069	12.6314	9.81239	15.1113	10.3304	14.7926
	SAFB2_HUMAN	Scaffold attachment factor B2 OS=Homo sapiens GN=SAFB2 PE=1 SV=1	7	0.109429	1.26536	17.9319	18.2517	17.5744	18.2133	17.8608	17.7932	17.5854	18.0525
	FUBP2_HUMAN	Far upstream element-binding protein 2 OS=Homo sapiens GN=KHSRP PE=1 SV=4	17	0.109736	0.657234	19.3665	18.8481	19.6137	19.5946	19.1627	18.6008	19.7641	18.4414
	SEPT7_HUMAN	Septin-7 OS=Homo sapiens GN=SEPT7 PE=1 SV=2	14	0.109758	0.684981	18.3132	17.993	18.4991	17.4205	18.4645	17.6702	18.2101	18.2198
	JPH2_HUMAN	Junctophilin-2 OS=Homo sapiens GN=JPH2 PE=1 SV=2	5	0.110063	1.47917	16.2179	16.6132	15.6216	16.935	16.1889	16.4708	16.6239	16.8924
	L1CAM_HUMAN	Neural cell adhesion molecule L1 OS=Homo sapiens GN=L1CAM PE=1 SV=2	7	0.110147	0.286374	13.3823	13.5695	15.0752	13.2362	15.3278	13.5071	17.122	13.3784
	RS20_HUMAN	40S ribosomal protein S20 OS=Homo sapiens GN=RPS20 PE=1 SV=1	3	0.110168	0.734154	17.2015	16.9972	17.2045	16.8527	17.6303	16.5991	17.5614	17.3652
	RM38_HUMAN	39S ribosomal protein L38, mitochondrial OS=Homo sapiens GN=MRPL38 PE=1 SV=2	5	0.110372	0.610415	15.8162	15.5799	16.9684	16.0757	16.7225	16.5351	17.4225	15.8904
	DBLOH_HUMAN	Diablo homolog, mitochondrial OS=Homo sapiens GN=DIABLO PE=1 SV=1	9	0.110894	1.17612	18.5595	18.6478	18.5247	19.0669	18.6257	18.751	18.6245	18.8049
	RFC5_HUMAN	Replication factor C subunit 5 OS=Homo sapiens GN=RFC5 PE=1 SV=1	7	0.11123	0.764392	16.2689	15.4272	16.2463	16.0744	15.5304	15.4608	16.2375	15.7702
	CISY_HUMAN	Citrate synthase, mitochondrial OS=Homo sapiens GN=CS PE=1 SV=2	21	0.111539	1.19393	21.7237	22.0599	21.6737	21.9942	21.9377	21.86	21.7011	22.1449
	INT1_HUMAN	Integrator complex subunit 1 OS=Homo sapiens GN=INTS1 PE=1 SV=2	8	0.111599	0.510788	15.426	15.1651	16.7101	14.4828	16.4899	15.9039	15.2718	14.4691
	IPO7_HUMAN	Importin-7 OS=Homo sapiens GN=IPO7 PE=1 SV=1	12	0.111992	1.38183	17.5954	17.8818	17.4448	17.5355	17.1744	17.6053	16.6032	17.6616
	KAT7_HUMAN	Histone acetyltransferase KAT7 OS=Homo sapiens GN=KAT7 PE=1 SV=1	3	0.11201	0.6189	16.3248	16.2314	16.2748	14.7306	16.4167	15.7099	15.9215	15.4969
	ACSF2_HUMAN	Acyl-CoA synthetase family member 2, mitochondrial OS=Homo sapiens GN=ACSF2 PE=1 SV=2	9	0.112121	0.626363	16.1084	15.6169	16.3996	14.8278	16.3141	15.9325	17.2066	16.9517
	RENR_HUMAN	Renin receptor OS=Homo sapiens GN=ATP6AP2 PE=1 SV=2	9	0.112143	0.766739	17.6633	17.5094	17.3312	16.606	17.754	17.1282	17.5121	17.4844
	LSG1_HUMAN	Large subunit GTPase 1 homolog OS=Homo sapiens GN=LSG1 PE=1 SV=2	3	0.1122	1.4562	17.9627	18.3387	17.7117	17.8557	17.6673	18.0644	17.1848	18.4365
	FUBP1_HUMAN	Far upstream element-binding protein 1 OS=Homo sapiens GN=FUBP1 PE=1 SV=3	10	0.112441	0.708886	17.2219	16.7257	17.4561	17.2427	17.0058	16.8561	17.9199	16.7937
	DDX47_HUMAN	Probable ATP-dependent RNA helicase DDX47 OS=Homo sapiens GN=DDX47 PE=1 SV=1	2	0.112913	1.4156	14.2294	14.986	14.1068	14.6628	15.1613	15.0101	14.5471	15.3914
	SC11A_HUMAN	Signal peptidase complex catalytic subunit SEC11A OS=Homo sapiens GN=SEC11A PE=1 SV=1	6	0.112959	1.34479	18.7891	19.1967	18.3829	18.3569	18.6118	19.0244	18.1061	19.0216
	RM19_HUMAN	39S ribosomal protein L19, mitochondrial OS=Homo sapiens GN=MRPL19 PE=1 SV=2	4	0.113142	0.606581	16.3043	16.3011	17.1908	15.6107	16.9835	16.379	17.1953	16.4983
	COMT_HUMAN	Catechol O-methyltransferase OS=Homo sapiens GN=COMT PE=1 SV=2	13	0.113793	1.47295	17.8461	18.3672	17.2212	17.0794	17.6897	18.6329	17.789	18.7012
	XXLT1_HUMAN	Xyloside xylosyltransferase 1 OS=Homo sapiens GN=XXYLT1 PE=1 SV=1	2	0.113984	2.62268	12.6005	15.1791	10.6536	12.9693	13.712	14.4025	14.0102	13.9894
	LPPRC_HUMAN	Leucine-rich PPR motif-containing protein, mitochondrial OS=Homo sapiens GN=LRPPRC PE=1 SV=3	78	0.114133	0.914452	22.3109	22.2866	22.4013	22.2749	22.3698	22.0772	22.252	22.1792
	TTYH3_HUMAN	Protein tweety homolog 3 OS=Homo sapiens GN=TTYH3 PE=1 SV=3	2	0.114412	0.362527	14.6845	12.7081	14.8037	11.8423	15.4837	15.6385	15.2875	14.2151
	CD11A_HUMAN	Cyclin-dependent kinase 11A OS=Homo sapiens GN=CDK11A PE=1 SV=4;sp	4	0.114447	0.33643	16.2703	16.5626	16.9615	15.2791	15.8633	12.6859	16.705	14.9861
	DNJA2_HUMAN	DnaJ homolog subfamily A member 2 OS=Homo sapiens GN=DNAJA2 PE=1 SV=1	6	0.11469	3.26212	15.2279	15.9377	13.5439	15.2217	14.4678	15.0022	11.606	15.5072
	P4HA1_HUMAN	Prolyl 4-hydroxylase subunit alpha-1 OS=Homo sapiens GN=P4HA1 PE=1 SV=2	10	0.114987	0.852414	17.3992	17.1473	17.4061	17.4278	17.4498	17.247	17.7479	17.2594
	SYPM_HUMAN	Probable proline--tRNA ligase, mitochondrial OS=Homo sapiens GN=PARS2 PE=1 SV=1	2	0.115276	0.681502	13.82	13.1855	12.8707	13.0159	14.537	13.8684	14.2715	13.2166
	FKBP8_HUMAN	Peptidyl-prolyl cis-trans isomerase FKBP8 OS=Homo sapiens GN=FKBP8 PE=1 SV=2	5	0.115803	0.858593	17.7719	17.2549	17.4878	17.3913	17.709	17.5441	17.3939	17.2925
	TOM70_HUMAN	Mitochondrial import receptor subunit TOM70 OS=Homo sapiens GN=TOMM70 PE=1 SV=1	29	0.115856	1.35775	20.5104	20.3742	20.0815	20.5932	20.201	20.7989	20.1413	20.9326
	ALG2_HUMAN	Alpha-1,3/1,6-mannosyltransferase ALG2 OS=Homo sapiens GN=ALG2 PE=1 SV=1	5	0.115973	1.41781	15.6932	16.2011	15.7761	15.6519	15.4993	16.1654	15.2346	16.1994
	RT30_HUMAN	28S ribosomal protein S30, mitochondrial OS=Homo sapiens GN=MRPS30 PE=1 SV=2	3	0.116214	0.890052	15.8928	15.866	15.9973	15.9385	16.2554	16.023	16.0025	15.6484
	SF3B1_HUMAN	Splicing factor 3B subunit 1 OS=Homo sapiens GN=SF3B1 PE=1 SV=3	44	0.11625	1.09066	20.4638	20.5475	20.1946	20.4881	20.5441	20.582	20.5883	20.6741
	POGZ_HUMAN	Pogo transposable element with ZNF domain OS=Homo sapiens GN=POGZ PE=1 SV=2	11	0.116563	1.22446	16.9681	17.5086	17.3955	17.5204	17.5927	17.5982	17.0844	17.5822
	GRHPR_HUMAN	Glyoxylate reductase/hydroxypyruvate reductase OS=Homo sapiens GN=GRHPR PE=1 SV=1	5	0.116644	1.31159	16.5787	16.7713	16.9527	17.1151	16.9085	17.1965	16.2861	17.2083
	RT26_HUMAN	28S ribosomal protein S26, mitochondrial OS=Homo sapiens GN=MRPS26 PE=1 SV=1	2	0.11687	0.373526	16.8801	14.6662	16.592	15.5941	16.1192	13.4346	16.1181	16.3317
	ARM10_HUMAN	Armadillo repeat-containing protein 10 OS=Homo sapiens GN=ARMC10 PE=1 SV=1	4	0.117161	1.72886	14.6329	14.8276	13.5446	14.1358	12.9239	14.7679	14.4007	14.9301
	DX39A_HUMAN	ATP-dependent RNA helicase DDX39A OS=Homo sapiens GN=DDX39A PE=1 SV=2	7	0.117216	1.38026	16.814	16.9467	16.9411	17.0081	17.0501	17.9504	16.4455	17.2053
	RM46_HUMAN	39S ribosomal protein L46, mitochondrial OS=Homo sapiens GN=MRPL46 PE=1 SV=1	4	0.117727	1.34564	15.1085	15.4928	15.487	15.9481	15.3083	15.2618	14.612	15.5263
	ADRO_HUMAN	NADPH:adrenodoxin oxidoreductase, mitochondrial OS=Homo sapiens GN=FDXR PE=1 SV=3	5	0.11865	0.45314	15.377	12.985	15.4326	13.9218	16.8039	16.0716	15.5719	15.6391
	EMC3_HUMAN	ER membrane protein complex subunit 3 OS=Homo sapiens GN=EMC3 PE=1 SV=3	7	0.118723	1.3018	17.7022	17.8574	17.3328	18.1538	17.8234	17.8706	17.7095	18.2081
	MINP1_HUMAN	Multiple inositol polyphosphate phosphatase 1 OS=Homo sapiens GN=MINPP1 PE=1 SV=1	2	0.119284	0.548523	14.2265	14.4962	15.9891	15.0395	15.1786	13.9784	16.1371	14.5517
	YBOX1_HUMAN	Nuclease-sensitive element-binding protein 1 OS=Homo sapiens GN=YBX1 PE=1 SV=3	10	0.119355	1.3823	19.7527	19.9945	19.2503	20.3651	20.2388	20.477	20.6539	20.9274
	H2AY_HUMAN	Core histone macro-H2A.1 OS=Homo sapiens GN=H2AFY PE=1 SV=4	18	0.119773	1.25394	22.005	22.0876	21.3421	22.1102	22.0996	22.3435	21.6182	21.8294
	EEA1_HUMAN	Early endosome antigen 1 OS=Homo sapiens GN=EEA1 PE=1 SV=2	60	0.11996	1.12121	20.7157	20.8688	20.6833	21.061	20.7582	20.7739	20.7002	20.8139
	LMAN1_HUMAN	Protein ERGIC-53 OS=Homo sapiens GN=LMAN1 PE=1 SV=2	17	0.120003	1.22613	19.551	19.6171	19.1667	19.6755	19.457	19.5076	19.2323	19.7831
	ATD3B_HUMAN	ATPase family AAA domain-containing protein 3B OS=Homo sapiens GN=ATAD3B PE=1 SV=1	5	0.120815	2.78958	12.9199	16.4155	16.5509	17.2956	16.1667	17.3736	16.6793	17.1523
	HS105_HUMAN	Heat shock protein 105 kDa OS=Homo sapiens GN=HSPH1 PE=1 SV=1	12	0.121267	1.66037	17.1982	17.8624	17.3438	17.138	16.9653	18.2619	17.0129	18.1839
	HMGN1_HUMAN	Non-histone chromosomal protein HMG-14 OS=Homo sapiens GN=HMGN1 PE=1 SV=3	5	0.12171	1.66992	17.1564	17.4795	16.3434	18.1168	17.2162	17.655	16.9636	17.3874
	EIF3K_HUMAN	Eukaryotic translation initiation factor 3 subunit K OS=Homo sapiens GN=EIF3K PE=1 SV=1	4	0.121819	2.68135	14.0706	13.9123	13.0482	13.9828	13.2616	16.1796	13.5823	15.5799
	FAF2_HUMAN	FAS-associated factor 2 OS=Homo sapiens GN=FAF2 PE=1 SV=2	18	0.122061	1.20269	20.015	20.0429	19.7939	20.0242	19.9144	20.1052	19.8086	20.4246
	GAR1_HUMAN	H/ACA ribonucleoprotein complex subunit 1 OS=Homo sapiens GN=GAR1 PE=1 SV=1	6	0.122274	1.31664	17.9202	18.0796	17.0017	17.4772	17.3899	17.4545	16.153	17.0409
	PSPC1_HUMAN	Paraspeckle component 1 OS=Homo sapiens GN=PSPC1 PE=1 SV=1	7	0.122303	0.652368	17.4394	17.2785	17.5896	16.172	16.9341	16.7023	17.3134	16.6589
	AT1A1_HUMAN	Sodium/potassium-transporting ATPase subunit alpha-1 OS=Homo sapiens GN=ATP1A1 PE=1 SV=1	50	0.1224	1.13875	22.5457	22.6173	22.4507	22.7501	22.5105	22.5175	22.3314	22.7032
	LAMP2_HUMAN	Lysosome-associated membrane glycoprotein 2 OS=Homo sapiens GN=LAMP2 PE=1 SV=2	6	0.122468	0.709268	21.0757	20.6817	20.9899	19.8137	21.0086	20.7489	20.5805	20.428
	NHRF1_HUMAN	Na(+)/H(+) exchange regulatory cofactor NHE-RF1 OS=Homo sapiens GN=SLC9A3R1 PE=1 SV=4	3	0.122514	0.527282	16.5802	16.4815	16.7625	16.2653	16.6975	15.6975	17.0901	14.9927
	HIG2A_HUMAN	HIG1 domain family member 2A, mitochondrial OS=Homo sapiens GN=HIGD2A PE=1 SV=1	1	0.122691	0.448817	12.5383	12.3914	15.8048	13.1664	13.4312	12.8253	14.0598	12.8278
	EXOS7_HUMAN	Exosome complex component RRP42 OS=Homo sapiens GN=EXOSC7 PE=1 SV=3	3	0.122797	0.619369	14.9617	15.0849	15.3485	14.1478	15.2882	14.8268	14.8603	13.6347
	IDHC_HUMAN	Isocitrate dehydrogenase [NADP] cytoplasmic OS=Homo sapiens GN=IDH1 PE=1 SV=2	3	0.122829	2.03423	13.1052	14.3652	11.4265	13.7096	12.5259	12.7135	13.6864	14.0537
	SYTM_HUMAN	Threonine--tRNA ligase, mitochondrial OS=Homo sapiens GN=TARS2 PE=1 SV=1	2	0.122954	0.422578	15.3997	15.3274	16.0654	13.213	15.3024	14.3912	14.6234	13.4884
	VAPA_HUMAN	Vesicle-associated membrane protein-associated protein A OS=Homo sapiens GN=VAPA PE=1 SV=3	10	0.12307	1.29627	19.8519	19.9375	19.3465	19.9913	19.8016	19.8578	19.4889	20.1996
	SATT_HUMAN	Neutral amino acid transporter A OS=Homo sapiens GN=SLC1A4 PE=1 SV=1	7	0.123481	1.20162	17.9661	18.583	18.3417	18.4899	18.3102	18.3545	18.4504	18.701
	PODXL_HUMAN	Podocalyxin OS=Homo sapiens GN=PODXL PE=1 SV=2	3	0.123563	1.80307	12.8466	14.3233	13.6553	15.1799	13.4301	13.9694	15.0298	14.8911
	DLDH_HUMAN	Dihydrolipoyl dehydrogenase, mitochondrial OS=Homo sapiens GN=DLD PE=1 SV=2	16	0.12388	0.926708	19.4436	19.4864	19.7314	19.5667	19.4848	19.3033	19.6809	19.5451
	DYST_HUMAN	Dystonin OS=Homo sapiens GN=DST PE=1 SV=4	20	0.123911	0.697465	16.9953	15.8392	17.0751	16.7028	16.8104	16.8297	17.4032	16.8332
	SRPRA_HUMAN	Signal recognition particle receptor subunit alpha OS=Homo sapiens GN=SRPRA PE=1 SV=2	21	0.123926	1.14343	19.6064	19.7808	19.1486	19.5957	19.4781	19.6145	19.3175	19.333
	EHD4_HUMAN	EH domain-containing protein 4 OS=Homo sapiens GN=EHD4 PE=1 SV=1	11	0.123968	1.23333	17.8143	18.0728	17.8305	17.8433	17.7996	18.0427	17.7114	18.4071
	CPSF3_HUMAN	Cleavage and polyadenylation specificity factor subunit 3 OS=Homo sapiens GN=CPSF3 PE=1 SV=1	4	0.124095	0.639028	15.3692	15.6034	16.3596	15.6159	15.9567	14.8125	16.4575	15.527
	1433E_HUMAN	14-3-3 protein epsilon OS=Homo sapiens GN=YWHAE PE=1 SV=1	19	0.124242	1.20353	20.3646	20.5676	20.6081	20.5484	20.0933	20.5961	20.3361	20.7591
	UFO_HUMAN	Tyrosine-protein kinase receptor UFO OS=Homo sapiens GN=AXL PE=1 SV=3	10	0.124269	0.409079	17.3116	16.3344	17.1095	14.4645	16.9876	17.2106	17.338	15.5791
	DHX15_HUMAN	Pre-mRNA-splicing factor ATP-dependent RNA helicase DHX15 OS=Homo sapiens GN=DHX15 PE=1 SV=2	26	0.124458	0.891154	20.0764	19.7396	19.8694	19.7537	19.9645	19.7258	19.8865	19.9128
	RGPD3_HUMAN	RanBP2-like and GRIP domain-containing protein 3 OS=Homo sapiens GN=RGPD3 PE=3 SV=2;sp	1	0.124672	1.11001	15.239	15.5175	15.4877	15.7274	15.5568	15.6793	15.9126	15.8743
	H10_HUMAN	Histone H1.0 OS=Homo sapiens GN=H1F0 PE=1 SV=3	5	0.124837	2.73583	16.0121	16.6731	13.569	17.0493	16.2951	17.4055	16.6161	17.1724
	JAK1_HUMAN	Tyrosine-protein kinase JAK1 OS=Homo sapiens GN=JAK1 PE=1 SV=2	2	0.124851	0.24019	14.8338	10.4435	12.1014	12.2953	13.8429	11.1728	12.6221	11.2577
	WDR1_HUMAN	WD repeat-containing protein 1 OS=Homo sapiens GN=WDR1 PE=1 SV=4	14	0.12536	1.11129	18.482	18.7996	19.0248	19.2376	18.7302	18.7149	18.9366	19.0304
	API5_HUMAN	Apoptosis inhibitor 5 OS=Homo sapiens GN=API5 PE=1 SV=3	11	0.125766	1.12196	18.2188	18.2576	17.5937	17.6158	17.7425	18.0232	17.6655	17.9879
	UGGG1_HUMAN	UDP-glucose:glycoprotein glucosyltransferase 1 OS=Homo sapiens GN=UGGT1 PE=1 SV=3	40	0.125778	0.882467	20.0961	20.1201	20.3962	20.088	20.3231	19.9884	20.3417	20.2391
	MPP6_HUMAN	MAGUK p55 subfamily member 6 OS=Homo sapiens GN=MPP6 PE=1 SV=2	8	0.126637	1.40985	16.3717	17.4271	17.0582	17.1433	17.3753	17.4999	17.1756	17.8927
	SE1L1_HUMAN	Protein sel-1 homolog 1 OS=Homo sapiens GN=SEL1L PE=1 SV=3	6	0.126729	0.702296	16.8169	15.9001	17.3566	17.5301	17.1964	16.4116	17.397	16.8857
	RT35_HUMAN	28S ribosomal protein S35, mitochondrial OS=Homo sapiens GN=MRPS35 PE=1 SV=1	7	0.12683	0.768647	17.3738	17.4718	18.2615	17.6943	17.8212	17.0872	17.8868	17.5716
	NU133_HUMAN	Nuclear pore complex protein Nup133 OS=Homo sapiens GN=NUP133 PE=1 SV=2	23	0.126838	1.1977	18.6379	18.8908	18.6908	18.6719	18.5659	18.7883	18.3838	18.9686
	SCRN1_HUMAN	Secernin-1 OS=Homo sapiens GN=SCRN1 PE=1 SV=2	3	0.126856	2.54249	14.5609	14.726	13.9633	14.6632	12.213	15.3274	14.4118	15.8173
	SYQ_HUMAN	Glutamine--tRNA ligase OS=Homo sapiens GN=QARS PE=1 SV=1	15	0.126963	0.772611	17.8203	17.589	18.316	17.4379	18.148	17.8249	18.2878	18.2316
	BGAL_HUMAN	Beta-galactosidase OS=Homo sapiens GN=GLB1 PE=1 SV=2	12	0.127072	0.762878	18.6055	18.6848	19.4127	18.5824	18.8029	18.3653	18.8414	18.4681
	VKGC_HUMAN	Vitamin K-dependent gamma-carboxylase OS=Homo sapiens GN=GGCX PE=1 SV=2	5	0.127382	0.592096	16.5674	16.0635	16.8202	15.0129	16.2165	16.0572	16.2157	15.6618
	VAPB_HUMAN	Vesicle-associated membrane protein-associated protein B/C OS=Homo sapiens GN=VAPB PE=1 SV=3	13	0.127831	1.28295	20.2295	20.2318	19.6004	20.3572	20.1167	20.2706	20.0312	20.5561
	CATB_HUMAN	Cathepsin B OS=Homo sapiens GN=CTSB PE=1 SV=3	4	0.127886	0.832734	18.3545	18.3633	18.8651	18.7583	18.5522	18.0669	18.654	18.181
	NXF1_HUMAN	Nuclear RNA export factor 1 OS=Homo sapiens GN=NXF1 PE=1 SV=1	9	0.127894	1.34279	17.2736	17.6362	17.296	17.2135	17.1497	18.051	17.4825	18.002
	GDIR1_HUMAN	Rho GDP-dissociation inhibitor 1 OS=Homo sapiens GN=ARHGDIA PE=1 SV=3	4	0.128036	1.1568	16.8373	17.1895	17.344	17.2741	16.7537	17.1147	17.1985	17.3957
	RAN_HUMAN	GTP-binding nuclear protein Ran OS=Homo sapiens GN=RAN PE=1 SV=3	11	0.128163	1.11819	20.4251	20.4544	20.2826	20.5558	20.1112	20.1383	20.0597	20.3748
	SMCA5_HUMAN	SWI/SNF-related matrix-associated actin-dependent regulator of chromatin subfamily A member 5 OS=Homo sapiens GN=SMARCA5 PE=1 SV=1	23	0.128727	1.17618	19.4676	19.7405	19.3421	19.778	19.6526	19.5658	19.6048	19.9193
	ARI4B_HUMAN	AT-rich interactive domain-containing protein 4B OS=Homo sapiens GN=ARID4B PE=1 SV=2	2	0.128776	2.34619	12.412	14.2812	13.6997	13.3849	14.3858	15.3675	12.6138	14.9989
	PRDX4_HUMAN	Peroxiredoxin-4 OS=Homo sapiens GN=PRDX4 PE=1 SV=1	15	0.128804	1.09208	20.4999	20.6533	20.545	20.732	20.4138	20.6333	20.6561	20.6046
	PREP_HUMAN	Presequence protease, mitochondrial OS=Homo sapiens GN=PITRM1 PE=1 SV=3	34	0.129512	0.916078	19.813	19.617	19.8406	19.5976	19.6947	19.5949	19.7672	19.8002
	PSME3_HUMAN	Proteasome activator complex subunit 3 OS=Homo sapiens GN=PSME3 PE=1 SV=1	2	0.129668	0.290653	13.2386	13.7499	16.2828	14.6949	15.0956	12.55	16.2656	12.7573
	FLNA_HUMAN	Filamin-A OS=Homo sapiens GN=FLNA PE=1 SV=4	104	0.129742	1.09182	23.0386	23.0473	22.9936	23.067	22.8306	22.9613	22.9872	23.2814
	RL10_HUMAN	60S ribosomal protein L10 OS=Homo sapiens GN=RPL10 PE=1 SV=4	10	0.129763	0.881702	18.043	18.0684	18.3495	18.2496	18.4704	18.1244	18.8781	18.572
	LMNB1_HUMAN	Lamin-B1 OS=Homo sapiens GN=LMNB1 PE=1 SV=2	50	0.13013	1.1591	22.7515	22.838	22.6055	23.1249	22.6417	22.7439	22.6521	22.796
	QCR9_HUMAN	Cytochrome b-c1 complex subunit 9 OS=Homo sapiens GN=UQCR10 PE=1 SV=3	2	0.130251	1.63205	16.6591	17.0539	15.9887	15.8952	15.8583	16.9751	15.9347	17.3434
	MSI1H_HUMAN	RNA-binding protein Musashi homolog 1 OS=Homo sapiens GN=MSI1 PE=1 SV=1	3	0.130433	0.44197	15.6145	15.1414	16.4727	13.7393	15.7817	14.4748	15.8191	15.6205
	RAB24_HUMAN	Ras-related protein Rab-24 OS=Homo sapiens GN=RAB24 PE=1 SV=1	2	0.130751	0.526752	14.2175	13.7804	15.4175	15.3005	15.0161	14.0245	15.9603	13.8068
	MCM6_HUMAN	DNA replication licensing factor MCM6 OS=Homo sapiens GN=MCM6 PE=1 SV=1	11	0.131042	1.34546	17.5025	18.1038	18.4525	18.2626	17.7776	18.3756	17.3341	18.0372
	AFAD_HUMAN	Afadin OS=Homo sapiens GN=MLLT4 PE=1 SV=3	4	0.131076	0.538571	15.2285	14.8734	15.4677	13.4311	16.4021	15.3299	15.9333	15.8259
	AKP8L_HUMAN	A-kinase anchor protein 8-like OS=Homo sapiens GN=AKAP8L PE=1 SV=3	6	0.13108	1.43265	16.6892	16.8133	16.4682	16.5556	15.6154	16.7414	16.2204	16.9578
	ELAV1_HUMAN	ELAV-like protein 1 OS=Homo sapiens GN=ELAVL1 PE=1 SV=2	15	0.131377	0.853421	20.442	20.0882	20.6387	20.272	20.1282	19.8331	19.8721	19.973
	RS19_HUMAN	40S ribosomal protein S19 OS=Homo sapiens GN=RPS19 PE=1 SV=2	11	0.13138	0.725668	18.6025	18.5791	18.7664	18.5279	18.9302	17.8699	18.92	18.3917
	RM45_HUMAN	39S ribosomal protein L45, mitochondrial OS=Homo sapiens GN=MRPL45 PE=1 SV=2	5	0.131531	0.817246	17.5328	17.5892	17.7078	17.2569	18.2919	17.7121	17.6052	17.4149
	LDAH_HUMAN	Lipid droplet-associated hydrolase OS=Homo sapiens GN=LDAH PE=1 SV=1	2	0.13179	1.15928	15.565	15.7872	15.4502	15.4147	15.6004	15.7954	15.5894	16.0606
	SEPT2_HUMAN	Septin-2 OS=Homo sapiens GN=SEPT2 PE=1 SV=1	9	0.131849	0.815716	17.8167	17.2935	17.7528	17.7082	17.5559	17.507	18.0348	17.4761
	RED1_HUMAN	Double-stranded RNA-specific editase 1 OS=Homo sapiens GN=ADARB1 PE=1 SV=1	2	0.132463	1.77223	12.3239	12.4863	12.3994	12.5021	12.4096	13.8317	12.0468	13.6619
	HEAT1_HUMAN	HEAT repeat-containing protein 1 OS=Homo sapiens GN=HEATR1 PE=1 SV=3	21	0.132618	1.31521	17.8422	18.0287	17.3115	18.0868	17.846	17.8071	17.978	18.6362
	TMX3_HUMAN	Protein disulfide-isomerase TMX3 OS=Homo sapiens GN=TMX3 PE=1 SV=2	13	0.132901	1.14297	19.3401	19.4132	19.2565	19.2913	19.3213	19.5338	19.2487	19.6995
	MSH6_HUMAN	DNA mismatch repair protein Msh6 OS=Homo sapiens GN=MSH6 PE=1 SV=2	3	0.133114	0.218281	16.0521	15.9022	16.4833	11.9942	15.5955	14.9947	15.1961	11.6529
	DNM1L_HUMAN	Dynamin-1-like protein OS=Homo sapiens GN=DNM1L PE=1 SV=2	7	0.133372	4.37584	12.7118	14.4526	13.9272	13.4521	11.8105	16.3295	12.8056	15.5392
	AIFM1_HUMAN	Apoptosis-inducing factor 1, mitochondrial OS=Homo sapiens GN=AIFM1 PE=1 SV=1	26	0.133611	1.13974	21.336	21.336	20.9965	21.3837	21.1669	21.234	20.9872	21.2877
	EIF2A_HUMAN	Eukaryotic translation initiation factor 2A OS=Homo sapiens GN=EIF2A PE=1 SV=3	2	0.133731	1.46932	14.4587	14.2027	13.9366	14.7146	14.2228	15.1256	14.2474	15.0434
	STML2_HUMAN	Stomatin-like protein 2, mitochondrial OS=Homo sapiens GN=STOML2 PE=1 SV=1	18	0.133952	1.12213	20.9914	21.0325	20.9392	21.2721	20.8004	21.0787	21.0838	21.0963
	RUVB2_HUMAN	RuvB-like 2 OS=Homo sapiens GN=RUVBL2 PE=1 SV=3	20	0.134267	0.941213	19.5099	19.3037	19.5578	19.4835	19.3248	19.2571	19.3444	19.3429
	RB11B_HUMAN	Ras-related protein Rab-11B OS=Homo sapiens GN=RAB11B PE=1 SV=4;sp	9	0.134431	1.22981	19.5818	19.8231	19.6504	19.9594	19.7258	20.4032	19.6016	19.5676
	IF6_HUMAN	Eukaryotic translation initiation factor 6 OS=Homo sapiens GN=EIF6 PE=1 SV=1	5	0.134434	1.30711	17.4299	17.3425	17.3214	18.1562	17.1491	17.494	17.5222	17.9754
	EIF3H_HUMAN	Eukaryotic translation initiation factor 3 subunit H OS=Homo sapiens GN=EIF3H PE=1 SV=1	9	0.13478	0.780047	16.0302	16.009	16.8417	16.651	16.7411	15.9032	16.9279	16.5442
	ARMX3_HUMAN	Armadillo repeat-containing X-linked protein 3 OS=Homo sapiens GN=ARMCX3 PE=1 SV=1	9	0.13501	0.842106	18.4426	18.099	18.2656	17.7779	18.4844	18.2373	18.2734	18.36
	ACADV_HUMAN	Very long-chain specific acyl-CoA dehydrogenase, mitochondrial OS=Homo sapiens GN=ACADVL PE=1 SV=1	25	0.135397	0.843735	20.0084	19.8943	20.127	19.8708	20.2545	19.6751	19.8339	19.8032
	ACSS3_HUMAN	Acyl-CoA synthetase short-chain family member 3, mitochondrial OS=Homo sapiens GN=ACSS3 PE=1 SV=1	2	0.135687	0.390044	13.4857	14.0251	15.6235	13.3505	14.8906	13.5233	15.9166	13.5843
	PABP1_HUMAN	Polyadenylate-binding protein 1 OS=Homo sapiens GN=PABPC1 PE=1 SV=2	19	0.136261	1.18065	20.5104	21.0589	20.9419	21.0757	20.8142	20.809	20.7516	21.0327
	TADBP_HUMAN	TAR DNA-binding protein 43 OS=Homo sapiens GN=TARDBP PE=1 SV=1	10	0.136356	0.840309	18.4567	18.399	19.186	18.7665	18.6709	18.6512	18.8371	18.33
	ITB5_HUMAN	Integrin beta-5 OS=Homo sapiens GN=ITGB5 PE=1 SV=1	3	0.136498	0.600982	13.8412	12.9718	15.4169	13.7092	15.0217	14.8975	15.3504	15.1132
	RT18A_HUMAN	28S ribosomal protein S18a, mitochondrial OS=Homo sapiens GN=MRPS18A PE=1 SV=1	3	0.136848	0.754101	15.7337	15.855	15.9225	15.0885	16.0018	15.4397	15.8261	15.4723
	PP1G_HUMAN	Serine/threonine-protein phosphatase PP1-gamma catalytic subunit OS=Homo sapiens GN=PPP1CC PE=1 SV=1	2	0.136927	1.83742	13.963	16.144	15.682	16.1835	15.9627	16.3754	16.2533	16.6689
	DHRS7_HUMAN	Dehydrogenase/reductase SDR family member 7 OS=Homo sapiens GN=DHRS7 PE=1 SV=1	3	0.137039	3.11318	12.3659	15.7814	14.0034	15.0649	14.9944	14.6714	14.8047	17.2042
	TRXR1_HUMAN	Thioredoxin reductase 1, cytoplasmic OS=Homo sapiens GN=TXNRD1 PE=1 SV=3	8	0.137295	1.34669	16.7843	17.542	17.9294	17.7968	17.3691	18.1321	17.768	18.0976
	USP9X_HUMAN	Probable ubiquitin carboxyl-terminal hydrolase FAF-X OS=Homo sapiens GN=USP9X PE=1 SV=3;sp	6	0.137301	0.449474	15.9753	14.1055	15.5457	14.4968	14.997	15.4184	16.5431	14.4257
	HNRPR_HUMAN	Heterogeneous nuclear ribonucleoprotein R OS=Homo sapiens GN=HNRNPR PE=1 SV=1	25	0.138141	1.14999	21.5255	21.6038	21.1594	21.5566	21.4668	21.4523	21.1443	21.4898
	SMD3_HUMAN	Small nuclear ribonucleoprotein Sm D3 OS=Homo sapiens GN=SNRPD3 PE=1 SV=1	4	0.138281	0.875964	20.1789	19.7945	20.2832	19.9589	19.8658	19.8289	19.8687	19.8502
	THOC6_HUMAN	THO complex subunit 6 homolog OS=Homo sapiens GN=THOC6 PE=1 SV=1	2	0.138453	0.589917	13.8187	13.9103	15.5458	14.987	14.3654	13.5247	15.3908	13.6531
	DEK_HUMAN	Protein DEK OS=Homo sapiens GN=DEK PE=1 SV=1	11	0.138596	0.758455	19.2625	18.872	19.1564	19.3161	19.1719	18.5211	19.5511	18.8374
	MOGS_HUMAN	Mannosyl-oligosaccharide glucosidase OS=Homo sapiens GN=MOGS PE=1 SV=5	22	0.138795	1.12158	19.5246	19.8262	19.4091	19.534	19.7209	19.6697	19.5692	19.8561
	IMP3_HUMAN	U3 small nucleolar ribonucleoprotein protein IMP3 OS=Homo sapiens GN=IMP3 PE=1 SV=1	2	0.139168	1.37926	14.7535	15.2324	14.0275	15.0101	14.8479	14.7036	14.6175	15.1559
	COPB2_HUMAN	Coatomer subunit beta OS=Homo sapiens GN=COPB2 PE=1 SV=2	17	0.139253	1.20047	18.0251	18.2542	17.9511	18.4037	18.1654	18.0693	17.9372	18.4059
	ADAS_HUMAN	Alkyldihydroxyacetonephosphate synthase, peroxisomal OS=Homo sapiens GN=AGPS PE=1 SV=1	26	0.139377	1.18966	19.5208	19.8601	19.7251	19.6119	19.7215	20.0372	19.661	20.1212
	NOP58_HUMAN	Nucleolar protein 58 OS=Homo sapiens GN=NOP58 PE=1 SV=1	17	0.139657	1.21501	19.6415	19.9065	19.4131	20.0927	19.8944	20.0336	19.882	19.922
	LIMA1_HUMAN	LIM domain and actin-binding protein 1 OS=Homo sapiens GN=LIMA1 PE=1 SV=1	25	0.139766	1.09871	20.1835	20.1806	20.0076	20.306	19.9758	20.1688	20.2185	20.2732
	CD99_HUMAN	CD99 antigen OS=Homo sapiens GN=CD99 PE=1 SV=1	5	0.140383	0.773321	18.4167	17.9958	18.3032	18.3799	18.4376	18.1269	18.6538	17.8253
	RM41_HUMAN	39S ribosomal protein L41, mitochondrial OS=Homo sapiens GN=MRPL41 PE=1 SV=1	5	0.140414	0.53883	17.3304	17.5286	17.5514	16.8327	17.8483	16.7659	18.3469	16.3815
	GRP78_HUMAN	78 kDa glucose-regulated protein OS=Homo sapiens GN=HSPA5 PE=1 SV=2	50	0.140984	1.23495	24.4063	24.6339	24.2631	25.0125	24.4749	24.5252	24.4874	24.6779
	FXR2_HUMAN	Fragile X mental retardation syndrome-related protein 2 OS=Homo sapiens GN=FXR2 PE=1 SV=2	3	0.141793	1.88705	14.7665	15.4744	12.8199	14.881	15.3985	15.2254	14.4554	15.5241
	NUP58_HUMAN	Nucleoporin p58/p45 OS=Homo sapiens GN=NUP58 PE=1 SV=1	2	0.141852	0.77213	15.6436	15.64	14.8675	14.3558	13.7503	13.6103	14.9377	14.1006
	AATM_HUMAN	Aspartate aminotransferase, mitochondrial OS=Homo sapiens GN=GOT2 PE=1 SV=3	25	0.141895	0.918296	21.5158	21.547	21.7642	21.6184	21.5427	21.2725	21.5273	21.4202
	VWA9_HUMAN	von Willebrand factor A domain-containing protein 9 OS=Homo sapiens GN=VWA9 PE=1 SV=2	2	0.141966	0.491911	13.1575	13.1131	14.7954	13.7495	14.2142	11.7668	14.5427	13.9864
	TM245_HUMAN	Transmembrane protein 245 OS=Homo sapiens GN=TMEM245 PE=1 SV=2	5	0.14207	1.26498	15.952	15.9729	15.3112	15.8318	15.4079	16.1382	15.589	15.6736
	SAC1_HUMAN	Phosphatidylinositide phosphatase SAC1 OS=Homo sapiens GN=SACM1L PE=1 SV=2	24	0.142321	0.902261	20.0479	20.0939	19.9549	19.7829	20.1061	19.7869	19.9844	19.8361
	SYAP1_HUMAN	Synapse-associated protein 1 OS=Homo sapiens GN=SYAP1 PE=1 SV=1	2	0.142324	1.30309	12.7071	13.6217	13.8802	13.947	13.6597	14.0755	15.1251	15.2556
	NUP88_HUMAN	Nuclear pore complex protein Nup88 OS=Homo sapiens GN=NUP88 PE=1 SV=2	4	0.142837	1.91457	16.0586	16.3883	15.3473	15.2751	14.1673	15.8467	14.139	15.9503
	RS29_HUMAN	40S ribosomal protein S29 OS=Homo sapiens GN=RPS29 PE=1 SV=2	2	0.143217	0.51588	13.6988	14.1578	16.2988	15.1864	15.5255	13.9697	16.4526	14.8422
	VAS1_HUMAN	V-type proton ATPase subunit S1 OS=Homo sapiens GN=ATP6AP1 PE=1 SV=2	7	0.14337	0.891585	16.9217	16.9523	16.9696	16.829	16.7627	16.5895	17.0316	16.6526
	FUMH_HUMAN	Fumarate hydratase, mitochondrial OS=Homo sapiens GN=FH PE=1 SV=3	22	0.143444	1.11054	21.0722	21.1432	21.1488	21.5272	21.0678	21.1769	21.093	21.1396
	DHTK1_HUMAN	Probable 2-oxoglutarate dehydrogenase E1 component DHKTD1, mitochondrial OS=Homo sapiens GN=DHTKD1 PE=1 SV=2	7	0.143944	1.23522	16.4946	17.2003	16.8504	17.0208	16.8874	16.8665	16.7014	17.0653
	CYB5_HUMAN	Cytochrome b5 OS=Homo sapiens GN=CYB5A PE=1 SV=2	6	0.144148	1.15989	16.5333	16.4449	16.7356	17.1022	16.678	17.0574	16.9231	17.1214
	G6PI_HUMAN	Glucose-6-phosphate isomerase OS=Homo sapiens GN=GPI PE=1 SV=4	7	0.144944	1.14448	18.3436	18.8211	18.962	18.9741	18.4697	18.6241	18.5868	18.7217
	TRXR2_HUMAN	Thioredoxin reductase 2, mitochondrial OS=Homo sapiens GN=TXNRD2 PE=1 SV=3	5	0.145513	1.32324	16.1272	16.1385	16.4596	16.9827	16.2772	16.4266	16.1125	17.0449
	IQGA1_HUMAN	Ras GTPase-activating-like protein IQGAP1 OS=Homo sapiens GN=IQGAP1 PE=1 SV=1	65	0.145644	1.1368	21.1516	21.4719	20.9285	20.9137	21.212	21.2756	21.31	21.6808
	CLIC4_HUMAN	Chloride intracellular channel protein 4 OS=Homo sapiens GN=CLIC4 PE=1 SV=4	7	0.145966	1.30135	16.9014	17.0118	16.8231	16.8316	15.6938	16.533	16.7586	17.3205
	NOP56_HUMAN	Nucleolar protein 56 OS=Homo sapiens GN=NOP56 PE=1 SV=4	30	0.146881	1.36559	20.4439	20.5998	19.5761	20.6609	20.3654	20.4293	20.1635	20.657
	ATD3A_HUMAN	ATPase family AAA domain-containing protein 3A OS=Homo sapiens GN=ATAD3A PE=1 SV=2	12	0.147033	1.18156	19.0622	19.0293	18.5773	19.0422	18.7061	18.802	18.6691	19.1039
	GBB1_HUMAN	Guanine nucleotide-binding protein G(I)/G(S)/G(T) subunit beta-1 OS=Homo sapiens GN=GNB1 PE=1 SV=3	8	0.147133	0.885577	21.0862	20.8464	21.1005	20.9243	20.6808	20.7518	21.0023	20.646
	G3BP1_HUMAN	Ras GTPase-activating protein-binding protein 1 OS=Homo sapiens GN=G3BP1 PE=1 SV=1	14	0.147261	0.814033	19.9751	20.108	20.8845	20.5941	20.4115	19.9035	20.6024	20.0804
	PSA6_HUMAN	Proteasome subunit alpha type-6 OS=Homo sapiens GN=PSMA6 PE=1 SV=1	6	0.147792	0.802874	17.1258	17.1942	17.5514	17.1848	16.8197	16.5729	17.1771	16.455
	GALT2_HUMAN	Polypeptide N-acetylgalactosaminyltransferase 2 OS=Homo sapiens GN=GALNT2 PE=1 SV=1	7	0.148309	0.807938	17.7215	17.2557	17.4136	16.8625	17.0172	17.1732	17.4056	17.0356
	RSF1_HUMAN	Remodeling and spacing factor 1 OS=Homo sapiens GN=RSF1 PE=1 SV=2	7	0.148496	1.32438	15.6903	15.7207	15.4318	16.4376	15.8545	16.1538	16.0062	16.2919
	TMM68_HUMAN	Transmembrane protein 68 OS=Homo sapiens GN=TMEM68 PE=2 SV=2	4	0.148767	1.38111	15.1515	15.1713	15.2209	15.9065	15.4895	15.6079	15.3528	16.3923
	TM109_HUMAN	Transmembrane protein 109 OS=Homo sapiens GN=TMEM109 PE=1 SV=1	3	0.148887	0.920916	18.1278	18.1158	18.3173	18.0211	18.0271	17.9506	18.365	18.2742
	SF3A2_HUMAN	Splicing factor 3A subunit 2 OS=Homo sapiens GN=SF3A2 PE=1 SV=2	5	0.148905	0.84297	17.8563	17.5231	17.5752	17.6507	17.5466	17.0145	17.5247	17.3287
	PRDX6_HUMAN	Peroxiredoxin-6 OS=Homo sapiens GN=PRDX6 PE=1 SV=3	9	0.149646	1.51877	18.5721	18.7403	17.7482	17.798	17.7294	19.1363	17.8874	18.6741
	CTRO_HUMAN	Citron Rho-interacting kinase OS=Homo sapiens GN=CIT PE=1 SV=2	2	0.150802	0.731893	18.5802	18.6186	19.3198	18.6173	19.417	18.4421	19.3734	19.2114
	ADX_HUMAN	Adrenodoxin, mitochondrial OS=Homo sapiens GN=FDX1 PE=1 SV=1	2	0.15084	1.24501	15.0474	15.3904	15.4394	15.9103	15.4525	16.0552	15.7917	15.6398
	DDX3X_HUMAN	ATP-dependent RNA helicase DDX3X OS=Homo sapiens GN=DDX3X PE=1 SV=3;sp	27	0.151277	1.12502	20.6839	21.0083	20.874	21.091	20.9225	20.8366	20.8059	21.0301
	F120C_HUMAN	Constitutive coactivator of PPAR-gamma-like protein 2 OS=Homo sapiens GN=FAM120C PE=2 SV=3	8	0.15131	0.860551	16.5444	16.1786	17.0541	17.0524	16.9281	16.8821	17.1242	16.6711
	HSP7C_HUMAN	Heat shock cognate 71 kDa protein OS=Homo sapiens GN=HSPA8 PE=1 SV=1	43	0.151354	1.11987	23.1994	23.3262	23.2019	23.6158	23.139	23.1844	23.2274	23.2946
	CDC5L_HUMAN	Cell division cycle 5-like protein OS=Homo sapiens GN=CDC5L PE=1 SV=2	17	0.151505	1.19265	18.446	18.3669	17.9354	18.5061	18.4886	18.7596	18.5283	18.7824
	GSTK1_HUMAN	Glutathione S-transferase kappa 1 OS=Homo sapiens GN=GSTK1 PE=1 SV=3	10	0.152066	1.13051	18.0941	18.4489	18.493	18.5238	18.0607	18.3792	18.5163	18.5202
	U3IP2_HUMAN	U3 small nucleolar RNA-interacting protein 2 OS=Homo sapiens GN=RRP9 PE=1 SV=1	4	0.1521	1.73651	13.9476	15.9573	15.402	15.6254	15.7308	16.0081	15.6338	16.3083
	RPB1_HUMAN	DNA-directed RNA polymerase II subunit RPB1 OS=Homo sapiens GN=POLR2A PE=1 SV=2	15	0.152606	0.751094	16.9634	16.4712	16.9641	17.13	17.1658	16.2833	17.2482	16.8054
	CBPD_HUMAN	Carboxypeptidase D OS=Homo sapiens GN=CPD PE=1 SV=2	5	0.153451	0.591397	15.6021	15.4236	16.2378	14.8231	16.3734	16.4082	16.4132	14.9404
	STXB3_HUMAN	Syntaxin-binding protein 3 OS=Homo sapiens GN=STXBP3 PE=1 SV=2	13	0.1537	1.21786	17.9989	18.6819	18.4351	18.5118	18.4816	18.5146	18.4233	18.7681
	RISC_HUMAN	Retinoid-inducible serine carboxypeptidase OS=Homo sapiens GN=SCPEP1 PE=1 SV=1	3	0.154755	1.69853	15.1825	14.9424	14.7005	15.1615	14.9578	16.3513	13.1353	14.5779
	TPD54_HUMAN	Tumor protein D54 OS=Homo sapiens GN=TPD52L2 PE=1 SV=2	5	0.155119	0.867548	16.564	16.4908	16.6971	16.6716	16.2885	16.0747	16.8704	16.363
	VWA8_HUMAN	von Willebrand factor A domain-containing protein 8 OS=Homo sapiens GN=VWA8 PE=1 SV=2	2	0.155528	0.259666	14.503	14.2721	13.7007	9.52769	14.3964	14.2426	14.6946	11.4711
	MCU_HUMAN	Calcium uniporter protein, mitochondrial OS=Homo sapiens GN=MCU PE=1 SV=1	9	0.15613	0.619213	17.2912	16.7117	16.9753	16.3008	16.4361	14.7868	16.9158	17.0531
	BAZ1B_HUMAN	Tyrosine-protein kinase BAZ1B OS=Homo sapiens GN=BAZ1B PE=1 SV=2	24	0.156586	1.31587	18.9871	19.029	17.9601	18.9023	19.0122	19.1002	18.84	19.352
	CS052_HUMAN	Uncharacterized protein C19orf52 OS=Homo sapiens GN=C19orf52 PE=1 SV=2	2	0.156814	3.37924	10.8353	15.2035	13.9593	14.9395	15.3609	15.3697	13.9895	15.659
	EPHA2_HUMAN	Ephrin type-A receptor 2 OS=Homo sapiens GN=EPHA2 PE=1 SV=2	36	0.157103	1.16709	21.4407	21.5727	21.0553	21.4043	21.528	21.4647	21.4231	21.8972
	TIM44_HUMAN	Mitochondrial import inner membrane translocase subunit TIM44 OS=Homo sapiens GN=TIMM44 PE=1 SV=2	19	0.158269	1.08909	20.0406	20.1562	19.9368	20.1044	20.0526	20.0002	19.9625	20.2241
	STMN1_HUMAN	Stathmin OS=Homo sapiens GN=STMN1 PE=1 SV=3	4	0.158556	0.403631	15.2726	14.9437	17.082	15.0885	15.038	15.0678	15.956	13.0131
	PRP31_HUMAN	U4/U6 small nuclear ribonucleoprotein Prp31 OS=Homo sapiens GN=PRPF31 PE=1 SV=2	10	0.158886	0.87429	17.246	17.3259	17.5148	17.3541	17.3794	16.9758	17.4897	17.1988
	CPSF6_HUMAN	Cleavage and polyadenylation specificity factor subunit 6 OS=Homo sapiens GN=CPSF6 PE=1 SV=2	9	0.158908	1.28532	17.8613	18.7973	18.6445	18.8904	17.7582	17.9382	18.2374	18.324
	RFC1_HUMAN	Replication factor C subunit 1 OS=Homo sapiens GN=RFC1 PE=1 SV=4	7	0.159224	0.559921	15.9534	15.2282	16.2568	14.1354	15.8031	15.3696	15.6525	15.5858
	DNJC1_HUMAN	DnaJ homolog subfamily C member 1 OS=Homo sapiens GN=DNAJC1 PE=1 SV=1	3	0.159391	1.91542	13.3802	15.2188	12.9488	14.6653	14.5948	14.3674	14.2259	14.6488
	INT7_HUMAN	Integrator complex subunit 7 OS=Homo sapiens GN=INTS7 PE=1 SV=1	3	0.159457	1.74871	12.7736	14.5865	13.536	13.8668	11.6103	11.492	12.9459	14.1457
	NDUBA_HUMAN	NADH dehydrogenase [ubiquinone] 1 beta subcomplex subunit 10 OS=Homo sapiens GN=NDUFB10 PE=1 SV=3	7	0.159512	0.820697	17.0563	16.343	16.9286	16.8892	16.7658	16.4698	16.8221	16.7305
	RGPD5_HUMAN	RANBP2-like and GRIP domain-containing protein 5/6 OS=Homo sapiens GN=RGPD5 PE=1 SV=3;sp	2	0.159748	1.72931	12.9018	12.9267	12.6518	14.1437	12.4169	13.9752	14.5339	14.6196
	LMAN2_HUMAN	Vesicular integral-membrane protein VIP36 OS=Homo sapiens GN=LMAN2 PE=1 SV=1	13	0.159969	1.08528	19.4214	19.6135	19.2485	19.2482	19.6844	19.7064	19.2742	19.5327
	MET_HUMAN	Hepatocyte growth factor receptor OS=Homo sapiens GN=MET PE=1 SV=4	5	0.160026	0.757723	15.3191	15.2803	14.9919	14.7979	15.8356	14.8182	15.187	14.8363
	RPA2_HUMAN	DNA-directed RNA polymerase I subunit RPA2 OS=Homo sapiens GN=POLR1B PE=1 SV=2	2	0.160263	0.406208	15.1952	15.0543	15.0892	12.3084	15.1769	12.9687	14.634	14.565
	GTR1_HUMAN	Solute carrier family 2, facilitated glucose transporter member 1 OS=Homo sapiens GN=SLC2A1 PE=1 SV=2	12	0.160394	0.886144	21.6689	21.5056	21.7088	21.4476	21.7077	21.3528	21.6121	21.6939
	TBB5_HUMAN	Tubulin beta chain OS=Homo sapiens GN=TUBB PE=1 SV=2	5	0.160457	1.37003	21.0607	21.1117	20.6915	20.7832	19.8524	20.9458	20.7066	21.2874
	B2L13_HUMAN	Bcl-2-like protein 13 OS=Homo sapiens GN=BCL2L13 PE=1 SV=1	11	0.160587	1.0952	17.3218	17.5826	17.8651	18.0844	17.8949	17.8405	17.9879	18.0871
	RM13_HUMAN	39S ribosomal protein L13, mitochondrial OS=Homo sapiens GN=MRPL13 PE=1 SV=1	4	0.160931	0.405721	14.8331	15.5429	16.5122	14.2294	15.6729	13.4204	16.5457	15.1654
	LRC8A_HUMAN	Volume-regulated anion channel subunit LRRC8A OS=Homo sapiens GN=LRRC8A PE=1 SV=1	9	0.161566	1.18784	17.524	17.565	17.3554	17.8342	17.5623	17.554	17.2635	17.7453
	ETHE1_HUMAN	Persulfide dioxygenase ETHE1, mitochondrial OS=Homo sapiens GN=ETHE1 PE=1 SV=2	2	0.161891	1.09686	16.1259	16.3658	16.3763	16.6165	15.9014	16.0204	16.3621	16.2965
	AL7A1_HUMAN	Alpha-aminoadipic semialdehyde dehydrogenase OS=Homo sapiens GN=ALDH7A1 PE=1 SV=5	18	0.162253	0.825629	19.285	19.1815	19.5488	19.3643	19.3447	18.6228	19.0294	18.9336
	SRPRB_HUMAN	Signal recognition particle receptor subunit beta OS=Homo sapiens GN=SRPRB PE=1 SV=3	15	0.162814	1.2673	19.9041	19.8991	18.9562	19.8038	19.7702	19.9218	19.3907	19.7637
	TOM20_HUMAN	Mitochondrial import receptor subunit TOM20 homolog OS=Homo sapiens GN=TOMM20 PE=1 SV=1	4	0.162967	4.19642	18.4771	17.6146	13.9265	18.5163	16.5345	18.5488	14.1908	16.7257
	AKAP2_HUMAN	A-kinase anchor protein 2 OS=Homo sapiens GN=AKAP2 PE=1 SV=3	8	0.163019	1.2005	17.5638	18.067	17.9529	18.4643	17.905	17.8585	18.0388	18.1253
	CCD47_HUMAN	Coiled-coil domain-containing protein 47 OS=Homo sapiens GN=CCDC47 PE=1 SV=1	17	0.163154	1.19528	18.6735	18.927	18.6479	19.1738	18.9203	18.7926	18.8651	19.2427
	MIC19_HUMAN	MICOS complex subunit MIC19 OS=Homo sapiens GN=CHCHD3 PE=1 SV=1	12	0.163956	0.892727	18.7923	18.4507	18.633	18.6612	18.4284	18.3739	18.5138	18.2269
	ADT1_HUMAN	ADP/ATP translocase 1 OS=Homo sapiens GN=SLC25A4 PE=1 SV=4	6	0.164394	1.18847	18.9552	19.2806	18.9631	18.8307	18.9797	19.272	18.7274	19.2386
	RUXF_HUMAN	Small nuclear ribonucleoprotein F OS=Homo sapiens GN=SNRPF PE=1 SV=1	4	0.164467	2.16813	13.0103	15.6741	15.2763	16.749	16.0762	16.4937	16.8808	16.7927
	STAG2_HUMAN	Cohesin subunit SA-2 OS=Homo sapiens GN=STAG2 PE=1 SV=3	13	0.165141	1.29747	17.5618	17.866	17.3387	17.1917	17.4823	17.9931	17.0485	17.8833
	SFXN3_HUMAN	Sideroflexin-3 OS=Homo sapiens GN=SFXN3 PE=1 SV=2	10	0.166053	1.14565	18.9973	18.9846	18.9818	19.2243	18.9195	18.9966	18.8103	19.288
	GT251_HUMAN	Procollagen galactosyltransferase 1 OS=Homo sapiens GN=COLGALT1 PE=1 SV=1	21	0.166143	0.896037	19.7262	19.5483	19.8457	19.5428	19.6754	19.4317	19.562	19.653
	BET1_HUMAN	BET1 homolog OS=Homo sapiens GN=BET1 PE=1 SV=1	2	0.166453	1.2607	16.9584	17.0485	16.4334	17.0563	17.1238	17.0745	16.5693	17.2426
	DTX3L_HUMAN	E3 ubiquitin-protein ligase DTX3L OS=Homo sapiens GN=DTX3L PE=1 SV=1	3	0.166457	1.37582	13.0844	13.7347	14.0835	14.6439	14.6037	14.3358	14.0206	14.919
	APMAP_HUMAN	Adipocyte plasma membrane-associated protein OS=Homo sapiens GN=APMAP PE=1 SV=2	23	0.166707	1.25332	21.3901	21.4938	20.9513	21.0934	21.09	21.2869	20.5123	21.3726
	RLA0_HUMAN	60S acidic ribosomal protein P0 OS=Homo sapiens GN=RPLP0 PE=1 SV=1;sp	12	0.167054	0.906195	20.5064	20.3899	20.7425	20.3883	20.4289	20.4523	20.7077	20.5866
	PDS5B_HUMAN	Sister chromatid cohesion protein PDS5 homolog B OS=Homo sapiens GN=PDS5B PE=1 SV=1	18	0.167095	1.26324	17.7742	18.0324	17.4849	18.3599	18.1092	18.1364	18.2007	18.3887
	ECI1_HUMAN	Enoyl-CoA delta isomerase 1, mitochondrial OS=Homo sapiens GN=ECI1 PE=1 SV=1	8	0.167252	1.1788	18.7841	18.9859	19.2093	19.1122	18.9892	19.5205	18.7453	19.0585
	RT21_HUMAN	28S ribosomal protein S21, mitochondrial OS=Homo sapiens GN=MRPS21 PE=1 SV=2	2	0.167457	0.434196	16.6135	16.5458	16.035	13.2662	16.2342	14.3923	15.9734	15.8375
	RAB14_HUMAN	Ras-related protein Rab-14 OS=Homo sapiens GN=RAB14 PE=1 SV=4	17	0.168195	1.09187	20.2784	20.2832	20.3097	20.5252	20.3066	20.3166	20.2361	20.5132
	PTSS1_HUMAN	Phosphatidylserine synthase 1 OS=Homo sapiens GN=PTDSS1 PE=1 SV=1	4	0.168867	0.771928	16.9321	16.8752	16.5559	16.44	17.1856	16.223	17.1671	16.8088
	1C07_HUMAN	HLA class I histocompatibility antigen, Cw-7 alpha chain OS=Homo sapiens GN=HLA-C PE=1 SV=3	1	0.169091	1.69453	14.8299	15.9877	14.9993	14.7324	15.6581	16.1332	15.0499	16.7275
	NOC2L_HUMAN	Nucleolar complex protein 2 homolog OS=Homo sapiens GN=NOC2L PE=1 SV=4	8	0.169279	1.34935	16.8101	17.5288	16.6523	17.5167	17.5237	17.311	17.0102	17.369
	TBL2_HUMAN	Transducin beta-like protein 2 OS=Homo sapiens GN=TBL2 PE=1 SV=1	10	0.169602	1.2299	17.4358	17.3998	17.0486	17.8003	17.4363	17.6225	17.6026	17.8949
	ORML3_HUMAN	ORM1-like protein 3 OS=Homo sapiens GN=ORMDL3 PE=1 SV=1	1	0.169858	1.28139	15.3703	15.5288	15.1363	16.0323	15.3483	15.7456	15.5886	15.5676
	1A03_HUMAN	HLA class I histocompatibility antigen, A-3 alpha chain OS=Homo sapiens GN=HLA-A PE=1 SV=2;sp	1	0.16997	2.4873	15.0596	15.8776	12.6462	13.0495	15.1622	15.7067	13.2647	16.7571
	ERLN1_HUMAN	Erlin-1 OS=Homo sapiens GN=ERLIN1 PE=1 SV=1	9	0.170048	1.32057	16.9251	17.5948	17.4349	17.2935	17.1892	18.0383	17.4975	17.7247
	AT11C_HUMAN	Phospholipid-transporting ATPase IG OS=Homo sapiens GN=ATP11C PE=1 SV=3	3	0.170068	0.556058	12.9868	13.0359	14.2184	12.46	13.0319	12.9102	15.8404	14.2847
	SYRC_HUMAN	Arginine--tRNA ligase, cytoplasmic OS=Homo sapiens GN=RARS PE=1 SV=2	14	0.170341	0.869916	17.7269	17.4306	18.5085	18.4871	18.1863	18.1727	18.2826	17.8097
	AOFA_HUMAN	Amine oxidase [flavin-containing] A OS=Homo sapiens GN=MAOA PE=1 SV=1	3	0.170577	1.3176	15.256	15.7278	14.5439	14.8882	15.7516	15.6003	14.8571	15.7839
	PDIP3_HUMAN	Polymerase delta-interacting protein 3 OS=Homo sapiens GN=POLDIP3 PE=1 SV=2	10	0.171342	1.27958	17.9021	18.1189	17.508	18.4558	17.8143	17.9222	17.6753	17.8254
	MTA2_HUMAN	Metastasis-associated protein MTA2 OS=Homo sapiens GN=MTA2 PE=1 SV=1	12	0.171818	0.728577	17.631	16.7168	17.3043	17.5598	17.5057	17.053	17.6908	16.9749
	DJB12_HUMAN	DnaJ homolog subfamily B member 12 OS=Homo sapiens GN=DNAJB12 PE=1 SV=4	3	0.17251	0.513255	15.0935	12.7788	13.4681	12.3062	15.1844	14.5403	14.1562	14.4279
	CBR1_HUMAN	Carbonyl reductase [NADPH] 1 OS=Homo sapiens GN=CBR1 PE=1 SV=3;sp	4	0.172618	2.02209	12.8408	15.5049	15.8683	16.1812	15.0359	15.9243	15.7627	15.9607
	S23A2_HUMAN	Solute carrier family 23 member 2 OS=Homo sapiens GN=SLC23A2 PE=1 SV=1	2	0.172917	0.194546	11.4383	13.054	15.4983	11.808	15.0991	11.3657	15.5871	11.9477
	ARF1_HUMAN	ADP-ribosylation factor 1 OS=Homo sapiens GN=ARF1 PE=1 SV=2;sp	7	0.173059	1.27931	18.6566	18.8195	18.3951	18.2845	18.4964	19.2409	18.2955	18.9201
	CISD1_HUMAN	CDGSH iron-sulfur domain-containing protein 1 OS=Homo sapiens GN=CISD1 PE=1 SV=1	3	0.173256	1.55514	15.8559	15.7113	15.7563	16.1264	14.5008	16.0535	15.4158	16.1857
	COA1_HUMAN	Cytochrome c oxidase assembly factor 1 homolog OS=Homo sapiens GN=COA1 PE=1 SV=1	3	0.173861	0.544219	14.6761	14.3934	13.1322	11.4881	15.3436	13.5576	14.6079	14.8098
	EFHD2_HUMAN	EF-hand domain-containing protein D2 OS=Homo sapiens GN=EFHD2 PE=1 SV=1	5	0.174066	1.463	15.5163	15.7998	14.7042	16.1797	14.5859	14.8205	15.4333	15.6354
	SAFB1_HUMAN	Scaffold attachment factor B1 OS=Homo sapiens GN=SAFB PE=1 SV=4	17	0.174225	1.21807	19.6489	19.5934	19.4275	20.1136	19.3947	19.7714	19.8615	19.9926
	ZN638_HUMAN	Zinc finger protein 638 OS=Homo sapiens GN=ZNF638 PE=1 SV=2	2	0.174577	1.32075	14.8875	15.6769	14.8679	14.9011	13.4355	14.2328	14.3273	14.3127
	RAB5C_HUMAN	Ras-related protein Rab-5C OS=Homo sapiens GN=RAB5C PE=1 SV=2	8	0.174602	1.1526	20.953	21.1541	21.1963	21.6172	21.2981	21.6107	21.3306	21.2157
	SSRA_HUMAN	Translocon-associated protein subunit alpha OS=Homo sapiens GN=SSR1 PE=1 SV=3	4	0.174628	1.55793	19.0931	18.7497	17.6057	18.9374	18.8221	19.8035	18.6608	19.2496
	NU5M_HUMAN	NADH-ubiquinone oxidoreductase chain 5 OS=Homo sapiens GN=MT-ND5 PE=1 SV=2	2	0.17555	0.535553	14.7251	13.4682	14.6904	13.8841	15.194	15.6388	14.1864	12.2012
	TR150_HUMAN	Thyroid hormone receptor-associated protein 3 OS=Homo sapiens GN=THRAP3 PE=1 SV=2	24	0.17611	1.15762	19.7383	19.7661	19.4336	19.8756	19.6369	19.6193	19.4165	19.8089
	VINC_HUMAN	Vinculin OS=Homo sapiens GN=VCL PE=1 SV=4	23	0.17626	1.61491	18.8169	19.0689	18.7757	18.5959	17.49	18.9721	18.189	19.4004
	ATPA_HUMAN	ATP synthase subunit alpha, mitochondrial OS=Homo sapiens GN=ATP5A1 PE=1 SV=1	44	0.176431	1.2107	23.393	23.532	23.0904	23.8236	23.1676	23.3703	22.6988	22.7274
	NDUF4_HUMAN	NADH dehydrogenase [ubiquinone] 1 alpha subcomplex assembly factor 4 OS=Homo sapiens GN=NDUFAF4 PE=1 SV=1	2	0.176509	0.509341	15.2123	15.7259	17.5938	15.9815	16.9496	16.139	17.8956	15.9117
	TBA1A_HUMAN	Tubulin alpha-1A chain OS=Homo sapiens GN=TUBA1A PE=1 SV=1;sp	1	0.176549	0.51522	17.8443	15.4713	16.7136	16.7211	16.2712	15.0373	16.5146	16.2871
	HS2ST_HUMAN	Heparan sulfate 2-O-sulfotransferase 1 OS=Homo sapiens GN=HS2ST1 PE=1 SV=1	3	0.176885	0.717772	14.8715	14.4114	13.76	13.9283	15.2563	14.7977	14.8238	13.6606
	SCMC2_HUMAN	Calcium-binding mitochondrial carrier protein SCaMC-2 OS=Homo sapiens GN=SLC25A25 PE=1 SV=1	6	0.17709	2.02138	16.3506	17.3255	16.7418	16.6498	14.5583	17.1768	16.374	16.934
	CEND_HUMAN	Cell cycle exit and neuronal differentiation protein 1 OS=Homo sapiens GN=CEND1 PE=2 SV=1	7	0.179009	1.2947	18.4362	18.5296	18.199	19.1678	18.5772	18.6148	18.3755	18.7662
	CQ10B_HUMAN	Coenzyme Q-binding protein COQ10 homolog B, mitochondrial OS=Homo sapiens GN=COQ10B PE=2 SV=1	1	0.179125	0.662639	14.9918	13.4034	12.9537	12.6543	12.6729	12.6112	13.2493	12.8241
	SYG_HUMAN	Glycine--tRNA ligase OS=Homo sapiens GN=GARS PE=1 SV=3	18	0.179967	0.833248	18.5106	18.6545	18.5638	18.025	18.3996	18.1797	18.8969	18.4591
	MTCL1_HUMAN	Microtubule cross-linking factor 1 OS=Homo sapiens GN=MTCL1 PE=1 SV=5	2	0.18024	4.26853	17.9368	18.3834	12.357	17.1045	16.941	20.4173	18.3155	18.02
	SLIRP_HUMAN	SRA stem-loop-interacting RNA-binding protein, mitochondrial OS=Homo sapiens GN=SLIRP PE=1 SV=1	3	0.18086	0.740875	14.2842	13.3931	14.5005	14.7733	14.2549	13.7555	14.5201	13.9069
	PPR18_HUMAN	Phostensin OS=Homo sapiens GN=PPP1R18 PE=1 SV=1	7	0.181632	0.674929	16.0936	16.0997	16.1502	16.1436	16.0586	14.9085	16.7382	15.62
	SGMR1_HUMAN	Sigma non-opioid intracellular receptor 1 OS=Homo sapiens GN=SIGMAR1 PE=1 SV=1	3	0.182537	1.10843	15.7197	15.8432	15.0446	15.3421	14.7095	14.6255	14.7071	14.9642
	CENPV_HUMAN	Centromere protein V OS=Homo sapiens GN=CENPV PE=1 SV=1	5	0.182627	1.28104	16.9809	17.0462	16.4245	17.3924	16.9913	17.1396	16.8532	17.1009
	PGES2_HUMAN	Prostaglandin E synthase 2 OS=Homo sapiens GN=PTGES2 PE=1 SV=1	11	0.18285	1.23202	18.4074	19.008	18.8591	18.6559	18.5854	18.9786	18.5626	18.9761
	TMF1_HUMAN	TATA element modulatory factor OS=Homo sapiens GN=TMF1 PE=1 SV=2	7	0.182969	1.85812	16.3005	16.0266	15.5201	16.6294	16.0498	16.5958	14.0479	16.2419
	XCT_HUMAN	Cystine/glutamate transporter OS=Homo sapiens GN=SLC7A11 PE=1 SV=1	3	0.18329	1.77898	15.4214	16.8046	16.2083	15.6601	16.2812	17.8732	16.3294	17.2265
	NPL4_HUMAN	Nuclear protein localization protein 4 homolog OS=Homo sapiens GN=NPLOC4 PE=1 SV=3	10	0.183533	0.837865	17.4581	17.3023	17.4452	16.8781	17.3656	16.958	17.5888	17.6985
	S10AG_HUMAN	Protein S100-A16 OS=Homo sapiens GN=S100A16 PE=1 SV=1	2	0.183562	1.54264	13.6245	13.6852	12.8306	14.4799	14.1388	14.7695	14.1801	14.341
	DBNL_HUMAN	Drebrin-like protein OS=Homo sapiens GN=DBNL PE=1 SV=1	2	0.183636	1.8369	13.1691	15.0946	13.5812	14.5315	12.8305	13.9789	14.8771	14.3621
	SYNE1_HUMAN	Nesprin-1 OS=Homo sapiens GN=SYNE1 PE=1 SV=4	3	0.183689	3.51005	16.7237	17.0537	15.868	17.1646	13.8292	18.741	15.2464	15.954
	AUP1_HUMAN	Ancient ubiquitous protein 1 OS=Homo sapiens GN=AUP1 PE=1 SV=1	5	0.184108	0.572881	16.1631	15.448	15.4955	14.9375	15.5582	13.4695	15.5556	15.7026
	EIF3L_HUMAN	Eukaryotic translation initiation factor 3 subunit L OS=Homo sapiens GN=EIF3L PE=1 SV=1	9	0.184218	0.891944	17.2444	17.2745	17.5965	17.5273	17.5181	17.1049	17.8056	17.5981
	TBRG4_HUMAN	Protein TBRG4 OS=Homo sapiens GN=TBRG4 PE=1 SV=1	12	0.18444	0.840753	18.008	18.1112	18.328	17.7607	18.2558	17.8676	18.2713	18.1226
	PCAT2_HUMAN	Lysophosphatidylcholine acyltransferase 2 OS=Homo sapiens GN=LPCAT2 PE=1 SV=1	10	0.184795	1.16471	17.3161	17.6688	17.4314	17.9325	17.3709	17.2973	17.2597	17.3593
	RRP5_HUMAN	Protein RRP5 homolog OS=Homo sapiens GN=PDCD11 PE=1 SV=3	8	0.184932	3.91421	15.2872	15.1608	11.0737	16.0915	15.5447	16.1201	14.0197	16.4279
	MED23_HUMAN	Mediator of RNA polymerase II transcription subunit 23 OS=Homo sapiens GN=MED23 PE=1 SV=2	2	0.184961	3.85711	12.6456	11.3345	9.25205	12.2319	12.6028	14.8505	10.4896	14.3633
	TEX10_HUMAN	Testis-expressed sequence 10 protein OS=Homo sapiens GN=TEX10 PE=1 SV=2	10	0.185197	1.08572	17.0713	17.2431	16.739	16.9389	17.1578	17.349	16.844	16.7556
	STBD1_HUMAN	Starch-binding domain-containing protein 1 OS=Homo sapiens GN=STBD1 PE=1 SV=1	4	0.186559	2.13097	14.9224	15.832	14.635	14.0097	14.1002	15.8869	13.4823	15.7774
	RS9_HUMAN	40S ribosomal protein S9 OS=Homo sapiens GN=RPS9 PE=1 SV=3	16	0.186744	0.76846	19.4238	19.5735	19.3429	19.0816	19.7448	18.8272	19.617	19.1263
	PAF1_HUMAN	RNA polymerase II-associated factor 1 homolog OS=Homo sapiens GN=PAF1 PE=1 SV=2	3	0.186981	0.600204	15.6519	15.4818	16.1497	15.3465	15.6579	13.7249	15.5247	15.485
	GAPR1_HUMAN	Golgi-associated plant pathogenesis-related protein 1 OS=Homo sapiens GN=GLIPR2 PE=1 SV=3	6	0.186993	1.14261	17.3254	17.2259	17.843	18.2427	17.0233	17.3608	17.6656	17.7973
	STRBP_HUMAN	Spermatid perinuclear RNA-binding protein OS=Homo sapiens GN=STRBP PE=1 SV=1	3	0.187045	0.437301	15.3759	15.2496	15.6732	12.4535	15.468	14.4508	15.0372	14.6271
	GPM6A_HUMAN	Neuronal membrane glycoprotein M6-a OS=Homo sapiens GN=GPM6A PE=1 SV=2	2	0.187152	0.7108	15.2731	13.9337	15.468	15.09	15.4459	15.2694	15.3899	15.3139
	XPP3_HUMAN	Probable Xaa-Pro aminopeptidase 3 OS=Homo sapiens GN=XPNPEP3 PE=1 SV=1	2	0.187201	0.473068	14.5767	13.7052	14.3611	14.731	14.6301	13.5297	14.7314	12.0139
	NOL10_HUMAN	Nucleolar protein 10 OS=Homo sapiens GN=NOL10 PE=1 SV=1	5	0.18723	2.60187	14.0486	14.5607	14.8942	14.8873	12.1669	15.8278	14.3149	15.6669
	SYTL5_HUMAN	Synaptotagmin-like protein 5 OS=Homo sapiens GN=SYTL5 PE=1 SV=1	2	0.187477	0.616031	15.6771	14.4378	13.4898	13.9401	14.5324	13.8664	13.9463	12.6055
	GTR3_HUMAN	Solute carrier family 2, facilitated glucose transporter member 3 OS=Homo sapiens GN=SLC2A3 PE=1 SV=1;sp	4	0.187933	1.17553	15.8785	15.7982	15.9329	16.5017	16.1416	16.2769	16.1869	16.4964
	ABI1_HUMAN	Abl interactor 1 OS=Homo sapiens GN=ABI1 PE=1 SV=4	2	0.188097	0.807682	16.3017	15.7926	15.9507	15.3696	15.8563	15.4952	15.2544	15.4731
	TBL1R_HUMAN	F-box-like/WD repeat-containing protein TBL1XR1 OS=Homo sapiens GN=TBL1XR1 PE=1 SV=1;sp	2	0.188377	0.540259	14.5931	13.3596	15.4143	13.2817	13.4491	13.7796	14.0201	13.5026
	MTX1_HUMAN	Metaxin-1 OS=Homo sapiens GN=MTX1 PE=1 SV=2	7	0.188707	1.12145	17.5111	17.5954	17.6778	17.6298	17.7453	17.9608	17.5328	17.9424
	WBP11_HUMAN	WW domain-binding protein 11 OS=Homo sapiens GN=WBP11 PE=1 SV=1	2	0.188844	0.772645	15.1908	15.241	15.5758	15.3516	15.2536	14.9253	15.1028	14.1167
	SAP_HUMAN	Prosaposin OS=Homo sapiens GN=PSAP PE=1 SV=2	13	0.189065	0.570371	19.3222	19.4707	20.2738	19.1348	19.3567	19.1044	19.9231	17.9258
	H1X_HUMAN	Histone H1x OS=Homo sapiens GN=H1FX PE=1 SV=1	8	0.189162	1.32858	18.6758	18.7171	18.1363	19.2593	18.4762	18.7041	18.629	18.8762
	FYCO1_HUMAN	FYVE and coiled-coil domain-containing protein 1 OS=Homo sapiens GN=FYCO1 PE=1 SV=3	2	0.189475	2.45789	13.8253	16.2261	15.9398	15.5806	13.5454	16.3343	16.4341	16.7932
	AP1G1_HUMAN	AP-1 complex subunit gamma-1 OS=Homo sapiens GN=AP1G1 PE=1 SV=5	10	0.189849	1.28954	16.7175	16.9082	16.3411	16.6573	16.7074	16.6841	16.2083	17.192
	YBOX3_HUMAN	Y-box-binding protein 3 OS=Homo sapiens GN=YBX3 PE=1 SV=4	5	0.18991	1.52296	15.0724	15.0518	15.0638	16.6859	16.137	16.3908	15.9847	16.5569
	UFSP2_HUMAN	Ufm1-specific protease 2 OS=Homo sapiens GN=UFSP2 PE=1 SV=3	12	0.190075	1.15769	17.2398	17.5173	17.1131	17.5229	17.4238	17.7363	17.3264	17.1716
	STT3A_HUMAN	Dolichyl-diphosphooligosaccharide--protein glycosyltransferase subunit STT3A OS=Homo sapiens GN=STT3A PE=1 SV=2	12	0.19037	1.2204	18.8047	19.0321	18.6723	18.5719	19.1321	19.4263	18.7289	19.4572
	CTNA2_HUMAN	Catenin alpha-2 OS=Homo sapiens GN=CTNNA2 PE=1 SV=5	1	0.191107	2.08393	16.0551	16.0623	13.7525	14.6155	14.4132	17.287	16.0329	16.5263
	NUP62_HUMAN	Nuclear pore glycoprotein p62 OS=Homo sapiens GN=NUP62 PE=1 SV=3	3	0.191723	1.71599	14.0098	14.4335	14.2145	14.7286	13.3559	15.4925	15.1472	15.189
	ERLN2_HUMAN	Erlin-2 OS=Homo sapiens GN=ERLIN2 PE=1 SV=1	13	0.191761	1.0825	19.8423	19.9735	19.8958	20.1514	19.9137	19.8419	19.9349	20.0774
	CSN2_HUMAN	COP9 signalosome complex subunit 2 OS=Homo sapiens GN=COPS2 PE=1 SV=1	3	0.191962	0.31604	13.531	14.4436	15.054	11.4233	15.0778	13.8494	16.0572	13.3564
	NACAM_HUMAN	Nascent polypeptide-associated complex subunit alpha, muscle-specific form OS=Homo sapiens GN=NACA PE=1 SV=1;sp	4	0.192465	0.870842	18.123	17.9476	18.0495	17.7982	17.8451	17.3708	17.7501	17.853
	ZW10_HUMAN	Centromere/kinetochore protein zw10 homolog OS=Homo sapiens GN=ZW10 PE=1 SV=3	6	0.192588	1.22394	16.6198	16.8111	16.5221	16.6899	16.6396	16.6474	16.277	17.0762
	MDHM_HUMAN	Malate dehydrogenase, mitochondrial OS=Homo sapiens GN=MDH2 PE=1 SV=3	19	0.192674	0.94853	22.3209	22.2834	22.4282	22.2909	22.031	22.0644	22.3423	22.1786
	CDK9_HUMAN	Cyclin-dependent kinase 9 OS=Homo sapiens GN=CDK9 PE=1 SV=3	2	0.193398	0.619522	12.645	11.9114	13.8653	12.1137	12.4531	12.7113	13.2224	12.6864
	ETFA_HUMAN	Electron transfer flavoprotein subunit alpha, mitochondrial OS=Homo sapiens GN=ETFA PE=1 SV=1	15	0.19484	1.1856	19.3668	19.5817	19.6319	20.2007	19.4549	19.7925	19.884	19.7452
	TRI25_HUMAN	E3 ubiquitin/ISG15 ligase TRIM25 OS=Homo sapiens GN=TRIM25 PE=1 SV=2	3	0.194993	1.13563	15.0208	15.0026	14.7706	15.0655	14.2892	14.3068	14.5816	15.0212
	KDEL2_HUMAN	KDEL motif-containing protein 2 OS=Homo sapiens GN=KDELC2 PE=1 SV=2	5	0.196243	0.756307	16.4258	15.9912	16.7068	15.9125	16.4246	16.7161	16.8341	16.1595
	GLE1_HUMAN	Nucleoporin GLE1 OS=Homo sapiens GN=GLE1 PE=1 SV=2	3	0.196282	0.680855	13.6224	13.3554	16.663	15.1177	16.0048	15.9327	16.1374	15.8036
	RS15_HUMAN	40S ribosomal protein S15 OS=Homo sapiens GN=RPS15 PE=1 SV=2	6	0.196824	0.32872	16.9514	16.1108	16.4985	16.9045	17.8826	13.7005	18.8942	17.0905
	PSMD3_HUMAN	26S proteasome non-ATPase regulatory subunit 3 OS=Homo sapiens GN=PSMD3 PE=1 SV=2	16	0.197042	1.1969	18.0536	18.3079	17.3318	17.9421	17.5707	17.4199	17.8686	18.1921
	ACL6A_HUMAN	Actin-like protein 6A OS=Homo sapiens GN=ACTL6A PE=1 SV=1	10	0.19756	1.26878	17.7984	18.1514	17.9047	17.6789	17.4958	18.2593	17.4895	17.9726
	RS11_HUMAN	40S ribosomal protein S11 OS=Homo sapiens GN=RPS11 PE=1 SV=3	7	0.197703	0.816189	18.2002	18.0666	18.3815	18.5119	18.6418	18.0108	18.9148	18.3769
	RPP30_HUMAN	Ribonuclease P protein subunit p30 OS=Homo sapiens GN=RPP30 PE=1 SV=1	2	0.197848	0.302708	13.4445	13.0217	15.7906	10.9693	15.0018	14.5135	14.6553	13.4917
	EI2BB_HUMAN	Translation initiation factor eIF-2B subunit beta OS=Homo sapiens GN=EIF2B2 PE=1 SV=3	2	0.197941	1.67754	13.5735	14.7971	13.9095	13.3926	13.7001	14.4338	13.8887	15.4337
	NCEH1_HUMAN	Neutral cholesterol ester hydrolase 1 OS=Homo sapiens GN=NCEH1 PE=1 SV=3	12	0.197988	1.12147	19.9499	19.9992	19.7653	20.179	20.08	20.0433	19.8123	20.0477
	RRP1B_HUMAN	Ribosomal RNA processing protein 1 homolog B OS=Homo sapiens GN=RRP1B PE=1 SV=3	4	0.198782	0.807197	14.0878	13.6842	13.691	13.8319	14.0996	13.3394	14.0008	13.7876
	BPHL_HUMAN	Valacyclovir hydrolase OS=Homo sapiens GN=BPHL PE=1 SV=1	2	0.199077	0.728911	14.4913	14.6177	15.2183	14.1994	14.2871	14.1882	14.6052	13.7719
	AMRP_HUMAN	Alpha-2-macroglobulin receptor-associated protein OS=Homo sapiens GN=LRPAP1 PE=1 SV=1	4	0.199632	0.657707	14.5371	14.7769	15.5815	14.9607	15.2414	14.7593	15.2698	13.715
	PDIA6_HUMAN	Protein disulfide-isomerase A6 OS=Homo sapiens GN=PDIA6 PE=1 SV=1	20	0.199834	1.1435	21.3017	21.2201	21.4464	21.9338	21.4712	21.6051	21.5424	21.7764
	GMDS_HUMAN	GDP-mannose 4,6 dehydratase OS=Homo sapiens GN=GMDS PE=1 SV=1	2	0.200316	1.67515	14.3142	14.8264	14.8798	14.4661	13.8373	15.0293	13.6688	15.3554
	DJB11_HUMAN	DnaJ homolog subfamily B member 11 OS=Homo sapiens GN=DNAJB11 PE=1 SV=1	9	0.200518	1.12563	18.2267	18.1203	18.1886	18.3248	18.0269	18.3997	18.2244	18.5046
	RB22A_HUMAN	Ras-related protein Rab-22A OS=Homo sapiens GN=RAB22A PE=1 SV=2	3	0.2009	1.63675	16.3479	16.755	16.4202	16.5454	15.2949	17.2996	16.5365	16.8428
	TMCO1_HUMAN	Calcium load-activated calcium channel OS=Homo sapiens GN=TMCO1 PE=1 SV=1	5	0.201292	0.642507	18.5739	18.4204	19.2054	19.35	19.0381	18.0706	20.0018	18.4254
	MICU1_HUMAN	Calcium uptake protein 1, mitochondrial OS=Homo sapiens GN=MICU1 PE=1 SV=1	3	0.201768	0.71916	17.6049	17.3795	17.3974	16.9703	16.2707	16.3214	16.9745	15.6739
	NEUL_HUMAN	Neurolysin, mitochondrial OS=Homo sapiens GN=NLN PE=1 SV=1	4	0.201775	1.63134	15.4906	15.5573	14.618	14.6741	14.497	15.3039	13.0921	14.9867
	ERAP1_HUMAN	Endoplasmic reticulum aminopeptidase 1 OS=Homo sapiens GN=ERAP1 PE=1 SV=3	29	0.201922	1.09529	19.4655	19.6277	19.6323	19.6493	19.8022	19.8013	19.5158	19.8628
	HINT2_HUMAN	Histidine triad nucleotide-binding protein 2, mitochondrial OS=Homo sapiens GN=HINT2 PE=1 SV=1	4	0.202297	1.41875	16.334	17.1921	17.5151	17.6857	16.618	17.7905	16.7046	16.522
	L2HDH_HUMAN	L-2-hydroxyglutarate dehydrogenase, mitochondrial OS=Homo sapiens GN=L2HGDH PE=1 SV=3	5	0.202681	1.12275	15.2694	15.4507	15.5103	15.8713	15.5335	15.7798	16.0457	15.9251
	RD23B_HUMAN	UV excision repair protein RAD23 homolog B OS=Homo sapiens GN=RAD23B PE=1 SV=1	5	0.203253	0.279361	14.6713	15.1601	16.2186	15.94	15.7277	11.8581	17.5074	13.8077
	THNS1_HUMAN	Threonine synthase-like 1 OS=Homo sapiens GN=THNSL1 PE=1 SV=2	2	0.204382	2.42758	14.2765	14.7967	14.0823	13.5311	13.2178	15.4492	12.0211	14.9387
	NNTM_HUMAN	NAD(P) transhydrogenase, mitochondrial OS=Homo sapiens GN=NNT PE=1 SV=3	34	0.204783	1.12521	20.9964	21.0389	21.0699	21.2971	20.8863	20.856	20.7052	21.1466
	SF3B6_HUMAN	Splicing factor 3B subunit 6 OS=Homo sapiens GN=SF3B6 PE=1 SV=1	2	0.204829	0.875206	17.3079	17.2637	17.0754	16.6725	17.0523	16.6654	16.6453	16.7101
	AT1B1_HUMAN	Sodium/potassium-transporting ATPase subunit beta-1 OS=Homo sapiens GN=ATP1B1 PE=1 SV=1	6	0.205043	1.31695	17.3889	17.3702	17.5224	17.9751	17.7511	17.8355	17.4293	18.4998
	TOM1_HUMAN	Target of Myb protein 1 OS=Homo sapiens GN=TOM1 PE=1 SV=2	2	0.205324	0.506887	13.1961	13.7479	14.3419	12.7603	14.3088	13.6679	14.6497	12.3995
	CHP1_HUMAN	Calcineurin B homologous protein 1 OS=Homo sapiens GN=CHP1 PE=1 SV=3	12	0.205662	0.875472	18.9591	18.7891	18.7568	18.5923	18.589	18.6622	18.7345	18.2282
	HM13_HUMAN	Minor histocompatibility antigen H13 OS=Homo sapiens GN=HM13 PE=1 SV=1	11	0.205714	1.13278	20.1126	20.0562	19.5277	19.9508	20.15	20.1947	19.7617	20.0699
	GSHR_HUMAN	Glutathione reductase, mitochondrial OS=Homo sapiens GN=GSR PE=1 SV=2	4	0.205831	0.929884	16.2114	15.9915	16.5616	16.522	15.9272	15.7203	16.095	16.1419
	TPR_HUMAN	Nucleoprotein TPR OS=Homo sapiens GN=TPR PE=1 SV=3	70	0.205966	1.10204	20.5969	20.6036	20.689	21.0447	20.5994	20.5903	20.5405	20.7479
	G45IP_HUMAN	Growth arrest and DNA damage-inducible proteins-interacting protein 1 OS=Homo sapiens GN=GADD45GIP1 PE=1 SV=1	6	0.206962	0.610418	17.5486	15.9338	16.835	17.328	17.4765	16.4531	17.3654	16.6622
	BCAM_HUMAN	Basal cell adhesion molecule OS=Homo sapiens GN=BCAM PE=1 SV=2	9	0.207778	0.631573	16.5564	15.8655	17.5975	15.9821	17.0607	16.309	16.8098	17.2159
	GUF1_HUMAN	Translation factor GUF1, mitochondrial OS=Homo sapiens GN=GUF1 PE=1 SV=1	2	0.209258	1.64386	13.5402	13.6048	12.7123	13.1707	13.7413	14.0417	12.9198	14.9647
	ACOT8_HUMAN	Acyl-coenzyme A thioesterase 8 OS=Homo sapiens GN=ACOT8 PE=1 SV=1	5	0.209666	0.823306	17.2418	17.247	17.5629	17.5954	17.4264	16.7632	17.5471	17.0507
	CCNL1_HUMAN	Cyclin-L1 OS=Homo sapiens GN=CCNL1 PE=1 SV=1	2	0.209806	2.1154	14.6269	16.1499	14.8338	13.9355	13.6063	15.8051	14.1249	15.6251
	EF1D_HUMAN	Elongation factor 1-delta OS=Homo sapiens GN=EEF1D PE=1 SV=5	8	0.209865	1.18727	18.6142	18.7743	18.6073	19.3006	18.3658	18.5354	18.9325	18.9001
	SCAM2_HUMAN	Secretory carrier-associated membrane protein 2 OS=Homo sapiens GN=SCAMP2 PE=1 SV=2	2	0.209895	1.2094	16.4427	16.6677	16.4065	16.8949	16.688	16.4958	16.3385	16.9144
	RASK_HUMAN	GTPase KRas OS=Homo sapiens GN=KRAS PE=1 SV=1	1	0.210001	1.32508	12.7734	12.6202	13.1534	13.5609	12.5842	12.873	12.9261	14.0074
	SMRD1_HUMAN	SWI/SNF-related matrix-associated actin-dependent regulator of chromatin subfamily D member 1 OS=Homo sapiens GN=SMARCD1 PE=1 SV=2;sp	2	0.210053	1.61376	15.0191	14.7819	13.594	14.8481	14.7501	14.909	14.2159	15.8018
	MYL6_HUMAN	Myosin light polypeptide 6 OS=Homo sapiens GN=MYL6 PE=1 SV=2	8	0.210564	0.893417	19.7801	19.9127	20.483	20.2701	20.0826	19.8532	20.5516	20.2109
	GOGA2_HUMAN	Golgin subfamily A member 2 OS=Homo sapiens GN=GOLGA2 PE=1 SV=3	15	0.210589	1.0817	17.7254	17.6411	17.4185	17.6451	17.6221	17.7243	17.7057	17.9144
	F162A_HUMAN	Protein FAM162A OS=Homo sapiens GN=FAM162A PE=1 SV=2	6	0.210703	0.689165	16.3594	16.5386	17.1933	15.7607	17.0147	16.4201	17.1637	16.8633
	WDR18_HUMAN	WD repeat-containing protein 18 OS=Homo sapiens GN=WDR18 PE=1 SV=2	8	0.210742	1.19212	16.724	16.9378	17.0449	17.0295	17.0768	17.1808	16.5192	17.231
	CELF1_HUMAN	CUGBP Elav-like family member 1 OS=Homo sapiens GN=CELF1 PE=1 SV=2	7	0.211372	0.871825	16.631	16.1241	16.8353	16.669	16.4138	16.5163	16.8769	16.6559
	CHD4_HUMAN	Chromodomain-helicase-DNA-binding protein 4 OS=Homo sapiens GN=CHD4 PE=1 SV=2	44	0.21144	0.912333	19.8796	19.7905	19.8503	19.8869	20.1629	19.8001	20.0207	19.9065
	RT05_HUMAN	28S ribosomal protein S5, mitochondrial OS=Homo sapiens GN=MRPS5 PE=1 SV=2	5	0.211441	0.65792	16.3592	16.8515	17.6163	16.9552	17.4891	16.3853	17.5087	16.3654
	FUND2_HUMAN	FUN14 domain-containing protein 2 OS=Homo sapiens GN=FUNDC2 PE=1 SV=2	4	0.212506	3.78373	16.6625	16.7067	11.2265	16.6702	16.1045	17.6746	16.1254	16.7466
	CACO2_HUMAN	Calcium-binding and coiled-coil domain-containing protein 2 OS=Homo sapiens GN=CALCOCO2 PE=1 SV=1	3	0.212599	0.687522	14.0235	13.6414	14.3793	12.8398	14.247	14.0026	13.8248	13.8288
	PYRG1_HUMAN	CTP synthase 1 OS=Homo sapiens GN=CTPS1 PE=1 SV=2	5	0.213039	1.34314	15.4358	15.1838	15.1386	16.0983	15.2133	15.9558	15.1041	15.3565
	RASN_HUMAN	GTPase NRas OS=Homo sapiens GN=NRAS PE=1 SV=1	2	0.213304	1.30762	18.1304	18.0978	18.0732	18.3294	17.8304	18.9282	17.9029	18.1292
	CD34_HUMAN	Hematopoietic progenitor cell antigen CD34 OS=Homo sapiens GN=CD34 PE=1 SV=2	2	0.213421	1.353	16.3104	15.9823	15.792	16.3583	15.2692	16.2658	15.8889	16.3987
	KIF23_HUMAN	Kinesin-like protein KIF23 OS=Homo sapiens GN=KIF23 PE=1 SV=3	3	0.214513	0.538553	15.079	13.4662	14.5494	12.5208	14.8809	14.4962	14.2966	14.7513
	RU2B_HUMAN	U2 small nuclear ribonucleoprotein B OS=Homo sapiens GN=SNRPB2 PE=1 SV=1	6	0.214717	0.859802	17.4581	17.351	17.3929	16.8321	17.4755	17.1802	17.673	17.7645
	ARPC4_HUMAN	Actin-related protein 2/3 complex subunit 4 OS=Homo sapiens GN=ARPC4 PE=1 SV=3	5	0.214803	0.844176	15.9615	16.0509	16.1435	15.7855	16.3977	15.776	16.3559	16.2687
	RUXE_HUMAN	Small nuclear ribonucleoprotein E OS=Homo sapiens GN=SNRPE PE=1 SV=1	5	0.214805	0.774691	18.2746	17.7846	18.2746	17.6143	18.8783	19.2048	18.5651	17.9158
	TBB6_HUMAN	Tubulin beta-6 chain OS=Homo sapiens GN=TUBB6 PE=1 SV=1	3	0.214824	0.432281	14.635	15.1111	16.3412	14.203	14.6529	14.3193	16.6731	13.8289
	RAB10_HUMAN	Ras-related protein Rab-10 OS=Homo sapiens GN=RAB10 PE=1 SV=1	11	0.215006	1.1287	19.2303	19.2518	19.1651	19.1358	18.9535	19.4072	18.9412	19.194
	ZCH18_HUMAN	Zinc finger CCCH domain-containing protein 18 OS=Homo sapiens GN=ZC3H18 PE=1 SV=2	5	0.215229	1.26522	16.6427	16.3896	16.4301	17.2114	16.5409	16.9024	16.5448	17.0127
	USMG5_HUMAN	Up-regulated during skeletal muscle growth protein 5 OS=Homo sapiens GN=USMG5 PE=1 SV=1	3	0.216243	1.11827	18.4904	18.6765	18.4397	18.5395	18.8917	18.8235	18.7221	19.1496
	WDR36_HUMAN	WD repeat-containing protein 36 OS=Homo sapiens GN=WDR36 PE=1 SV=1	9	0.216446	0.629822	15.9208	16.0574	16.5369	16.2168	16.8739	16.2494	16.9775	15.1176
	CGT_HUMAN	2-hydroxyacylsphingosine 1-beta-galactosyltransferase OS=Homo sapiens GN=UGT8 PE=2 SV=2	2	0.217517	0.605639	14.959	13.0415	15.0327	14.1133	15.627	15.8842	15.2747	14.9605
	UBE4A_HUMAN	Ubiquitin conjugation factor E4 A OS=Homo sapiens GN=UBE4A PE=1 SV=2	4	0.217749	1.77447	13.2804	14.2981	14.5841	13.8672	12.3129	13.6457	14.0599	15.7358
	CD82_HUMAN	CD82 antigen OS=Homo sapiens GN=CD82 PE=1 SV=1	2	0.218273	0.619134	14.9921	15.2043	15.4687	13.8996	15.0345	13.6996	14.9201	14.8451
	HNRPK_HUMAN	Heterogeneous nuclear ribonucleoprotein K OS=Homo sapiens GN=HNRNPK PE=1 SV=1	27	0.218416	0.88312	22.3486	22.0426	22.5234	22.1427	22.1711	22.3135	22.3417	22.1688
	USO1_HUMAN	General vesicular transport factor p115 OS=Homo sapiens GN=USO1 PE=1 SV=2	15	0.219006	0.932365	17.5902	17.5859	18.0324	18.0391	17.7536	17.4827	17.9597	17.8241
	G6PT1_HUMAN	Glucose-6-phosphate exchanger SLC37A4 OS=Homo sapiens GN=SLC37A4 PE=1 SV=1	2	0.219972	2.18637	11.4859	14.7671	14.0856	14.1599	12.8754	13.6141	13.7329	14.1529
	ARL8A_HUMAN	ADP-ribosylation factor-like protein 8A OS=Homo sapiens GN=ARL8A PE=1 SV=1	2	0.22015	2.10484	13.5519	16.6736	16.2074	16.6867	16.7794	16.814	15.4063	16.0656
	ADHX_HUMAN	Alcohol dehydrogenase class-3 OS=Homo sapiens GN=ADH5 PE=1 SV=4	2	0.220371	1.91457	11.3544	13.5882	13.5677	12.9785	13.0974	14.5875	14.2546	14.868
	NCLN_HUMAN	Nicalin OS=Homo sapiens GN=NCLN PE=1 SV=2	19	0.220526	1.22666	19.0695	19.2847	18.9136	19.4222	19.443	19.2366	19.0144	19.676
	NUP98_HUMAN	Nuclear pore complex protein Nup98-Nup96 OS=Homo sapiens GN=NUP98 PE=1 SV=4	20	0.220653	1.18584	18.8468	19.0883	18.8778	18.816	18.7373	18.8551	18.6715	19.3577
	NU155_HUMAN	Nuclear pore complex protein Nup155 OS=Homo sapiens GN=NUP155 PE=1 SV=1	23	0.221214	1.14352	19.1781	19.4198	19.3109	19.275	19.2095	19.2507	19.2531	19.7802
	TNR16_HUMAN	Tumor necrosis factor receptor superfamily member 16 OS=Homo sapiens GN=NGFR PE=1 SV=1	2	0.221545	0.374272	16.044	15.8693	15.975	13.1904	14.954	15.4379	17.2228	14.0269
	SF3A1_HUMAN	Splicing factor 3A subunit 1 OS=Homo sapiens GN=SF3A1 PE=1 SV=1	22	0.221906	0.927196	19.1152	19.1145	19.4907	19.1761	19.1655	19.0758	19.3331	19.3019
	EIF3D_HUMAN	Eukaryotic translation initiation factor 3 subunit D OS=Homo sapiens GN=EIF3D PE=1 SV=1	6	0.222111	1.59566	14.1376	16.1191	15.7604	16.1448	16.1432	16.2881	15.9641	16.15
	RS23_HUMAN	40S ribosomal protein S23 OS=Homo sapiens GN=RPS23 PE=1 SV=3	6	0.222169	0.466287	17.7314	17.8166	17.9698	17.4671	18.5199	15.3421	17.7037	16.8962
	MAVS_HUMAN	Mitochondrial antiviral-signaling protein OS=Homo sapiens GN=MAVS PE=1 SV=2	13	0.222746	0.843817	19.3164	18.9903	19.066	18.4061	19.0489	19.0037	19.122	19.1732
	CYFP1_HUMAN	Cytoplasmic FMR1-interacting protein 1 OS=Homo sapiens GN=CYFIP1 PE=1 SV=1	14	0.222783	0.831144	17.2185	17.3588	17.7146	17.0081	17.6873	17.3926	17.405	17.1986
	AATF_HUMAN	Protein AATF OS=Homo sapiens GN=AATF PE=1 SV=1	4	0.222879	1.24337	15.2943	16.1901	15.9635	15.9216	15.1234	15.409	15.9511	16.0687
	MPC2_HUMAN	Mitochondrial pyruvate carrier 2 OS=Homo sapiens GN=MPC2 PE=1 SV=1	3	0.223553	0.654624	16.5266	16.9759	17.7575	17.3195	17.3813	16.1496	17.9534	16.7288
	ABCD1_HUMAN	ATP-binding cassette sub-family D member 1 OS=Homo sapiens GN=ABCD1 PE=1 SV=2	8	0.226033	1.42946	16.4004	16.3209	15.5729	17.06	16.8484	17.0964	16.7767	17.1829
	DDX18_HUMAN	ATP-dependent RNA helicase DDX18 OS=Homo sapiens GN=DDX18 PE=1 SV=2	17	0.22648	1.13995	19.1067	19.1249	18.6597	19.1244	19.1676	19.1099	18.8915	19.2222
	IR3IP_HUMAN	Immediate early response 3-interacting protein 1 OS=Homo sapiens GN=IER3IP1 PE=1 SV=1	2	0.226583	1.29887	17.5763	17.9391	17.0432	16.9771	17.511	17.6477	17.1446	18.2202
	TSN9_HUMAN	Tetraspanin-9 OS=Homo sapiens GN=TSPAN9 PE=1 SV=1	2	0.227568	0.5957	17.0152	15.3744	15.475	16.1352	15.8648	14.9544	14.9873	13.889
	COF1_HUMAN	Cofilin-1 OS=Homo sapiens GN=CFL1 PE=1 SV=3	7	0.22813	1.43787	18.1281	18.9314	18.6231	19.5112	18.0739	18.9925	18.8366	18.3224
	RM22_HUMAN	39S ribosomal protein L22, mitochondrial OS=Homo sapiens GN=MRPL22 PE=1 SV=1	6	0.228926	0.916673	17.2192	17.34	16.8946	16.7263	17.4317	17.2076	17.5962	17.3657
	INT4_HUMAN	Integrator complex subunit 4 OS=Homo sapiens GN=INTS4 PE=1 SV=2	3	0.229006	0.42408	13.3106	11.9916	14.3578	13.711	13.7098	14.1684	15.5566	12.1134
	MCA3_HUMAN	Eukaryotic translation elongation factor 1 epsilon-1 OS=Homo sapiens GN=EEF1E1 PE=1 SV=1	4	0.229388	0.769393	15.4075	15.7237	16.1801	15.2944	15.3372	14.8503	15.6418	15.1853
	GABT_HUMAN	4-aminobutyrate aminotransferase, mitochondrial OS=Homo sapiens GN=ABAT PE=1 SV=3	6	0.229408	2.29458	16.2725	17.1776	15.7458	15.5211	16.6298	17.2676	13.0912	16.566
	MCM4_HUMAN	DNA replication licensing factor MCM4 OS=Homo sapiens GN=MCM4 PE=1 SV=5	14	0.22947	0.802057	16.9485	16.7821	18.0057	17.1537	16.8013	16.9532	17.6731	17.2667
	PRS10_HUMAN	26S protease regulatory subunit 10B OS=Homo sapiens GN=PSMC6 PE=1 SV=1	9	0.229952	0.769372	17.6696	17.4764	17.9914	17.0259	16.8595	17.0699	17.4356	16.8709
	BCAT2_HUMAN	Branched-chain-amino-acid aminotransferase, mitochondrial OS=Homo sapiens GN=BCAT2 PE=1 SV=2	13	0.230022	1.28701	18.2475	19.1601	18.9665	18.8319	18.7939	18.8557	18.3187	18.935
	RT22_HUMAN	28S ribosomal protein S22, mitochondrial OS=Homo sapiens GN=MRPS22 PE=1 SV=1	9	0.230973	0.782021	17.6602	17.7021	18.1465	17.981	17.871	17.6156	18.3258	17.2859
	NEB2_HUMAN	Neurabin-2 OS=Homo sapiens GN=PPP1R9B PE=1 SV=2	7	0.231148	1.95537	15.5457	15.1382	14.0913	15.518	15.4235	15.7337	13.8449	16.3852
	SAP18_HUMAN	Histone deacetylase complex subunit SAP18 OS=Homo sapiens GN=SAP18 PE=1 SV=1	4	0.231312	1.20444	16.0663	16.2529	16.634	17.1418	15.9059	16.4885	16.8478	16.6441
	HNRH2_HUMAN	Heterogeneous nuclear ribonucleoprotein H2 OS=Homo sapiens GN=HNRNPH2 PE=1 SV=1	7	0.231486	0.905544	18.4669	18.5068	19.1754	18.9539	18.3294	18.3138	19.0102	18.6348
	ABC3C_HUMAN	DNA dC->dU-editing enzyme APOBEC-3C OS=Homo sapiens GN=APOBEC3C PE=1 SV=2	4	0.232182	0.522266	13.5913	14.1369	16.3483	14.8693	16.0741	15.6127	16.8301	14.4762
	PSMD4_HUMAN	26S proteasome non-ATPase regulatory subunit 4 OS=Homo sapiens GN=PSMD4 PE=1 SV=1	2	0.233333	0.782107	15.6746	15.2862	16.0711	16.2405	15.6735	15.4514	15.8714	14.8943
	F134C_HUMAN	Protein FAM134C OS=Homo sapiens GN=FAM134C PE=1 SV=1	3	0.233337	1.16794	15.8201	15.8932	15.2947	15.9313	16.1845	16.1287	15.5536	15.7954
	NQO1_HUMAN	NAD(P)H dehydrogenase [quinone] 1 OS=Homo sapiens GN=NQO1 PE=1 SV=1	3	0.233823	1.70312	14.4055	14.7744	14.7121	14.8653	13.1886	15.5013	14.8535	15.0915
	MYH11_HUMAN	Myosin-11 OS=Homo sapiens GN=MYH11 PE=1 SV=3	2	0.23388	4.0505	17.9014	17.6156	13.6256	17.6039	13.231	17.9619	17.8347	17.4838
	ATP5H_HUMAN	ATP synthase subunit d, mitochondrial OS=Homo sapiens GN=ATP5H PE=1 SV=3	12	0.23433	1.13269	19.7243	19.979	19.9854	20.3709	19.6212	19.871	19.6041	19.433
	ACON_HUMAN	Aconitate hydratase, mitochondrial OS=Homo sapiens GN=ACO2 PE=1 SV=2	33	0.234968	1.0628	21.3587	21.394	21.5299	21.7211	21.4768	21.4222	21.2864	21.4661
	AQR_HUMAN	Intron-binding protein aquarius OS=Homo sapiens GN=AQR PE=1 SV=4	9	0.235572	0.587085	14.8439	15.5045	16.867	15.0716	16.5382	15.7409	17.4248	16.2835
	BCS1_HUMAN	Mitochondrial chaperone BCS1 OS=Homo sapiens GN=BCS1L PE=1 SV=1	7	0.235698	1.79725	14.4614	16.1601	16.201	15.3687	15.7683	16.8838	15.5633	16.9647
	CD63_HUMAN	CD63 antigen OS=Homo sapiens GN=CD63 PE=1 SV=2	3	0.236049	0.57781	18.4991	18.6791	18.9205	17.2788	18.886	17.0938	18.2162	18.3047
	DDX5_HUMAN	Probable ATP-dependent RNA helicase DDX5 OS=Homo sapiens GN=DDX5 PE=1 SV=1	29	0.236382	0.903284	21.8481	21.6864	21.8217	21.9498	21.9761	21.6321	21.7408	21.5314
	CMC2_HUMAN	Calcium-binding mitochondrial carrier protein Aralar2 OS=Homo sapiens GN=SLC25A13 PE=1 SV=2	14	0.236414	1.16088	19.0255	19.4869	19.4531	19.3342	19.3731	19.4336	19.0999	19.5578
	EF2_HUMAN	Elongation factor 2 OS=Homo sapiens GN=EEF2 PE=1 SV=4	30	0.236501	0.850057	19.8084	19.794	19.8064	19.1004	19.6324	19.5345	19.4305	19.3113
	ZN326_HUMAN	DBIRD complex subunit ZNF326 OS=Homo sapiens GN=ZNF326 PE=1 SV=2	14	0.236977	1.14048	19.2834	19.2612	18.9865	19.5157	19.1571	19.1597	19.0692	19.3182
	HCD2_HUMAN	3-hydroxyacyl-CoA dehydrogenase type-2 OS=Homo sapiens GN=HSD17B10 PE=1 SV=3	14	0.237004	1.22889	20.5204	20.9425	20.897	21.5586	20.6658	21.0509	21.0707	20.7913
	AL1B1_HUMAN	Aldehyde dehydrogenase X, mitochondrial OS=Homo sapiens GN=ALDH1B1 PE=1 SV=3	12	0.237258	0.936617	18.902	18.7312	19.0671	19.1368	18.7114	18.6529	19.0585	18.8402
	TIAR_HUMAN	Nucleolysin TIAR OS=Homo sapiens GN=TIAL1 PE=1 SV=1;sp	4	0.237478	0.739648	15.8213	16.2078	16.6809	15.7141	16.1932	15.4564	16.3096	15.8864
	S38A2_HUMAN	Sodium-coupled neutral amino acid transporter 2 OS=Homo sapiens GN=SLC38A2 PE=1 SV=2	3	0.238113	1.51438	13.5217	14.1951	13.9715	13.5134	12.6844	14.2146	14.8162	15.4658
	SC61G_HUMAN	Protein transport protein Sec61 subunit gamma OS=Homo sapiens GN=SEC61G PE=1 SV=1	2	0.238353	1.26714	19.3762	19.5488	18.5983	19.2653	19.3083	19.0703	18.7385	19.5034
	SYSC_HUMAN	Serine--tRNA ligase, cytoplasmic OS=Homo sapiens GN=SARS PE=1 SV=3	3	0.238381	1.75615	15.8636	16.1887	14.7653	14.3173	14.9702	16.2557	14.2808	16.3679
	STIP1_HUMAN	Stress-induced-phosphoprotein 1 OS=Homo sapiens GN=STIP1 PE=1 SV=1	11	0.239188	0.85186	17.8433	17.8976	18.1794	17.6885	17.5499	17.5793	18.3902	17.8721
	MOT1_HUMAN	Monocarboxylate transporter 1 OS=Homo sapiens GN=SLC16A1 PE=1 SV=3	7	0.239415	1.39498	17.8115	17.6549	17.5186	18.9143	18.0207	18.4286	18.3137	18.5876
	NMNA1_HUMAN	Nicotinamide/nicotinic acid mononucleotide adenylyltransferase 1 OS=Homo sapiens GN=NMNAT1 PE=1 SV=1	2	0.240887	0.466681	16.2956	14.464	14.8096	15.0118	15.9042	13.0315	13.7179	13.822
	TOM34_HUMAN	Mitochondrial import receptor subunit TOM34 OS=Homo sapiens GN=TOMM34 PE=1 SV=2	2	0.241687	1.79297	13.0954	14.6217	14.1244	14.045	14.3999	14.2043	13.1749	15.2931
	GNAI3_HUMAN	Guanine nucleotide-binding protein G(k) subunit alpha OS=Homo sapiens GN=GNAI3 PE=1 SV=3	10	0.241867	1.13892	18.9942	19.1256	19.1004	19.6666	19.3014	19.3016	19.2636	19.3164
	MIA3_HUMAN	Melanoma inhibitory activity protein 3 OS=Homo sapiens GN=MIA3 PE=1 SV=1	8	0.242318	1.22018	15.7339	15.7564	15.9317	16.1137	15.2131	16.0847	15.1675	15.2397
	DHB12_HUMAN	Very-long-chain 3-oxoacyl-CoA reductase OS=Homo sapiens GN=HSD17B12 PE=1 SV=2	15	0.242429	1.14778	20.0288	20.1573	19.4872	19.5322	19.928	19.9462	19.7116	20.3152
	TMED5_HUMAN	Transmembrane emp24 domain-containing protein 5 OS=Homo sapiens GN=TMED5 PE=1 SV=1	5	0.242597	1.27553	17.8997	18.0503	17.3905	17.1695	17.081	17.6837	17.2071	18.0792
	TXNL1_HUMAN	Thioredoxin-like protein 1 OS=Homo sapiens GN=TXNL1 PE=1 SV=3	4	0.242663	0.501817	14.7733	15.2492	16.0298	14.0839	14.5806	14.4299	15.8427	13.4843
	MDN1_HUMAN	Midasin OS=Homo sapiens GN=MDN1 PE=1 SV=2	3	0.242709	1.51571	12.5434	12.6193	12.3776	12.1704	12.6722	14.2842	13.5864	14.5056
	PGK1_HUMAN	Phosphoglycerate kinase 1 OS=Homo sapiens GN=PGK1 PE=1 SV=3	15	0.242857	1.136	19.0834	19.0386	19.1215	19.5347	18.7541	19.1478	19.3072	19.2809
	WDR43_HUMAN	WD repeat-containing protein 43 OS=Homo sapiens GN=WDR43 PE=1 SV=3	5	0.243378	1.68485	15.5573	17.2687	17.2834	16.6233	16.4276	17.0736	16.4385	17.7517
	NCBP1_HUMAN	Nuclear cap-binding protein subunit 1 OS=Homo sapiens GN=NCBP1 PE=1 SV=1	16	0.243729	0.824893	18.3263	18.1114	18.8352	17.9997	18.4229	18.3449	18.5235	18.541
	ZN207_HUMAN	BUB3-interacting and GLEBS motif-containing protein ZNF207 OS=Homo sapiens GN=ZNF207 PE=1 SV=1	5	0.243851	0.89779	16.0448	16.0019	15.6458	15.4866	15.3212	15.3562	15.4023	14.9471
	KHDR3_HUMAN	KH domain-containing, RNA-binding, signal transduction-associated protein 3 OS=Homo sapiens GN=KHDRBS3 PE=1 SV=1	5	0.244057	0.886882	17.2808	17.153	17.6984	17.8462	17.5484	17.1975	17.4072	17.0454
	NPM_HUMAN	Nucleophosmin OS=Homo sapiens GN=NPM1 PE=1 SV=2	18	0.244303	1.14809	23.3995	23.3512	22.9818	23.1018	23.0819	23.2128	22.8558	23.4501
	COT1_HUMAN	COUP transcription factor 1 OS=Homo sapiens GN=NR2F1 PE=1 SV=1;sp	2	0.244596	0.182145	12.5426	14.0576	15.6166	8.88087	15.1857	12.3208	15.3979	13.6562
	ACD11_HUMAN	Acyl-CoA dehydrogenase family member 11 OS=Homo sapiens GN=ACAD11 PE=1 SV=2	10	0.245542	1.45919	16.5726	16.0485	16.8611	17.4615	16.7337	17.613	16.1139	17.3391
	RPN2_HUMAN	Dolichyl-diphosphooligosaccharide--protein glycosyltransferase subunit 2 OS=Homo sapiens GN=RPN2 PE=1 SV=3	28	0.24599	1.12924	22.0407	22.2736	21.9795	21.8874	22.248	22.3264	21.8443	22.3265
	RS2_HUMAN	40S ribosomal protein S2 OS=Homo sapiens GN=RPS2 PE=1 SV=2	8	0.246023	0.835529	18.525	18.8037	19.2526	18.8437	19.1096	18.6175	19.2157	18.801
	HSP13_HUMAN	Heat shock 70 kDa protein 13 OS=Homo sapiens GN=HSPA13 PE=1 SV=1	4	0.246423	0.751427	15.4845	15.758	16.3887	16.079	16.3206	15.2002	16.3699	15.8774
	GRP75_HUMAN	Stress-70 protein, mitochondrial OS=Homo sapiens GN=HSPA9 PE=1 SV=2	58	0.246755	1.15217	23.6102	23.5566	23.1776	23.7867	23.2754	23.3731	23.3403	23.5046
	STIM1_HUMAN	Stromal interaction molecule 1 OS=Homo sapiens GN=STIM1 PE=1 SV=3	15	0.2471	1.14754	18.7957	18.6056	18.4912	18.9293	18.6683	18.8687	18.5947	18.9405
	PLEC_HUMAN	Plectin OS=Homo sapiens GN=PLEC PE=1 SV=3	279	0.247742	0.900798	23.6788	23.3951	23.543	23.62	23.7485	23.3786	23.7308	23.7045
	EMD_HUMAN	Emerin OS=Homo sapiens GN=EMD PE=1 SV=1	15	0.248651	1.11958	21.165	21.0965	20.5401	20.9513	20.9443	20.9557	20.804	21.1017
	GNAQ_HUMAN	Guanine nucleotide-binding protein G(q) subunit alpha OS=Homo sapiens GN=GNAQ PE=1 SV=4	7	0.248687	0.842435	18.1021	17.5118	17.974	17.6519	17.8674	18.1026	17.9108	17.5986
	ANFY1_HUMAN	Rabankyrin-5 OS=Homo sapiens GN=ANKFY1 PE=1 SV=2	6	0.248869	4.59983	10.2856	16.1539	16.1283	14.4692	14.7631	17.375	14.9355	16.9208
	CD276_HUMAN	CD276 antigen OS=Homo sapiens GN=CD276 PE=1 SV=1	4	0.249366	0.709048	17.0601	15.6956	16.979	16.5653	16.6197	16.9549	17.3413	16.8002
	RER1_HUMAN	Protein RER1 OS=Homo sapiens GN=RER1 PE=1 SV=1	6	0.249724	1.24459	19.0245	19.1482	18.4987	19.2763	19.3643	19.1556	18.8477	19.4179
	GTPB6_HUMAN	Putative GTP-binding protein 6 OS=Homo sapiens GN=GTPBP6 PE=2 SV=3	5	0.249819	1.64964	14.7837	14.4738	13.9025	14.9169	15.1995	15.3792	13.9356	15.9401
	RM24_HUMAN	39S ribosomal protein L24, mitochondrial OS=Homo sapiens GN=MRPL24 PE=1 SV=1	5	0.250216	0.767211	16.7983	16.4487	17.1748	16.4825	17.3185	16.4699	16.2226	16.5839
	RM11_HUMAN	39S ribosomal protein L11, mitochondrial OS=Homo sapiens GN=MRPL11 PE=1 SV=1	5	0.250986	0.746674	17.2131	16.5441	16.6201	15.528	16.8549	16.6415	17.0563	17.3451
	FERM2_HUMAN	Fermitin family homolog 2 OS=Homo sapiens GN=FERMT2 PE=1 SV=1	2	0.251473	1.94883	12.9992	12.4152	12.8085	13.1445	12.7719	14.3787	11.809	14.3006
	DGLB_HUMAN	Sn1-specific diacylglycerol lipase beta OS=Homo sapiens GN=DAGLB PE=1 SV=2	5	0.252187	1.3246	15.6826	16.2345	15.9492	15.6657	14.4587	15.5498	16.0713	16.334
	STOM_HUMAN	Erythrocyte band 7 integral membrane protein OS=Homo sapiens GN=STOM PE=1 SV=3	5	0.252614	1.26132	17.8363	18.6255	16.7912	16.7823	17.6624	18.3567	17.8712	17.7363
	NFS1_HUMAN	Cysteine desulfurase, mitochondrial OS=Homo sapiens GN=NFS1 PE=1 SV=3	7	0.252635	0.803727	16.6865	15.733	16.9214	16.6991	16.483	16.3123	16.5812	16.6668
	BIRC5_HUMAN	Baculoviral IAP repeat-containing protein 5 OS=Homo sapiens GN=BIRC5 PE=1 SV=3	2	0.252706	0.763006	17.4679	17.601	18.5302	18.0138	17.7432	17.6777	18.6287	17.5167
	ABCD3_HUMAN	ATP-binding cassette sub-family D member 3 OS=Homo sapiens GN=ABCD3 PE=1 SV=1	21	0.252948	1.16648	20.233	20.416	19.7827	20.2007	20.1502	19.9439	19.8244	20.3184
	QSOX2_HUMAN	Sulfhydryl oxidase 2 OS=Homo sapiens GN=QSOX2 PE=1 SV=3	2	0.253024	0.799015	15.4941	15.7937	16.1105	15.3524	16.0603	15.5072	15.9546	15.6715
	NUDC_HUMAN	Nuclear migration protein nudC OS=Homo sapiens GN=NUDC PE=1 SV=1	4	0.253154	0.815101	16.0469	15.4323	15.9465	15.7226	15.258	15.5269	15.8171	15.2068
	SERC_HUMAN	Phosphoserine aminotransferase OS=Homo sapiens GN=PSAT1 PE=1 SV=2	5	0.253324	1.24019	15.5347	15.7352	15.0414	15.6613	14.7156	15.4032	15.4374	15.1716
	S2546_HUMAN	Solute carrier family 25 member 46 OS=Homo sapiens GN=SLC25A46 PE=1 SV=1	3	0.253959	2.25996	14.7563	15.3451	13.2426	12.3223	13.0347	15.6874	14.4939	16.878
	SRC_HUMAN	Proto-oncogene tyrosine-protein kinase Src OS=Homo sapiens GN=SRC PE=1 SV=3	5	0.254142	0.698166	17.1327	16.7316	17.2212	15.6532	17.0593	16.8086	17.0177	17.164
	DERL1_HUMAN	Derlin-1 OS=Homo sapiens GN=DERL1 PE=1 SV=1	3	0.254313	0.623268	17.8556	18.2771	18.3828	17.9155	18.3772	17.6232	18.4709	16.5424
	G3BP2_HUMAN	Ras GTPase-activating protein-binding protein 2 OS=Homo sapiens GN=G3BP2 PE=1 SV=2	7	0.254806	1.20359	17.3478	17.1731	17.3527	18.0902	17.6117	17.9597	18.0699	18.2285
	ALG6_HUMAN	Dolichyl pyrophosphate Man9GlcNAc2 alpha-1,3-glucosyltransferase OS=Homo sapiens GN=ALG6 PE=1 SV=1	2	0.254885	0.800804	15.2598	15.6091	15.7318	15.1893	15.8638	15.2035	15.8568	15.4283
	ECHD1_HUMAN	Ethylmalonyl-CoA decarboxylase OS=Homo sapiens GN=ECHDC1 PE=1 SV=2	2	0.255143	1.7141	14.3378	15.2395	13.5715	13.3712	14.2755	14.3961	13.1626	15.4503
	PM34_HUMAN	Peroxisomal membrane protein PMP34 OS=Homo sapiens GN=SLC25A17 PE=1 SV=1	2	0.255395	0.564989	14.0219	14.5234	15.2521	14.3799	14.8331	12.4859	15.6544	15.0777
	RPN1_HUMAN	Dolichyl-diphosphooligosaccharide--protein glycosyltransferase subunit 1 OS=Homo sapiens GN=RPN1 PE=1 SV=1	35	0.255949	1.04632	22.6036	22.6675	22.6486	22.6499	22.6829	22.6813	22.5715	22.7692
	LAP2B_HUMAN	Lamina-associated polypeptide 2, isoforms beta/gamma OS=Homo sapiens GN=TMPO PE=1 SV=2	12	0.256506	1.21769	21.2457	21.2425	20.4488	21.3357	21.1883	21.3172	21.1504	21.2744
	NDC1_HUMAN	Nucleoporin NDC1 OS=Homo sapiens GN=NDC1 PE=1 SV=2	5	0.257124	1.37287	17.463	17.8634	16.1452	17.5062	17.3873	17.6538	17.6554	17.4561
	PCKGM_HUMAN	Phosphoenolpyruvate carboxykinase [GTP], mitochondrial OS=Homo sapiens GN=PCK2 PE=1 SV=3	11	0.257969	0.756577	17.1955	17.1895	17.5132	16.7852	16.6308	16.7997	17.734	16.6893
	SIL1_HUMAN	Nucleotide exchange factor SIL1 OS=Homo sapiens GN=SIL1 PE=1 SV=1	5	0.25797	0.596059	15.4828	13.5432	15.9069	14.6514	15.7872	15.4947	14.7806	15.2825
	MET7A_HUMAN	Methyltransferase-like protein 7A OS=Homo sapiens GN=METTL7A PE=1 SV=1	5	0.258307	1.51729	17.7721	17.1224	16.9149	17.6634	16.96	17.9626	16.4994	17.804
	CMC1_HUMAN	Calcium-binding mitochondrial carrier protein Aralar1 OS=Homo sapiens GN=SLC25A12 PE=1 SV=2	13	0.258481	1.15469	17.4798	17.8709	17.7167	17.7941	17.6531	17.506	17.5676	18.0762
	SF3A3_HUMAN	Splicing factor 3A subunit 3 OS=Homo sapiens GN=SF3A3 PE=1 SV=1	15	0.25851	1.10825	18.2897	18.168	18.4857	18.6011	18.2932	18.5019	18.3946	18.7854
	RL21_HUMAN	60S ribosomal protein L21 OS=Homo sapiens GN=RPL21 PE=1 SV=2	5	0.258544	0.82264	19.2558	19.0945	19.2939	19.5148	19.4546	18.7364	19.6647	19.1966
	NDUV2_HUMAN	NADH dehydrogenase [ubiquinone] flavoprotein 2, mitochondrial OS=Homo sapiens GN=NDUFV2 PE=1 SV=2	3	0.259991	0.541692	14.6384	14.2622	15.0406	15.6232	14.5459	13.1887	15.9056	13.5187
	S61A1_HUMAN	Protein transport protein Sec61 subunit alpha isoform 1 OS=Homo sapiens GN=SEC61A1 PE=1 SV=2	6	0.260346	1.31017	19.3501	19.4717	18.5465	19.6412	19.454	19.2463	18.6468	19.1972
	EZRI_HUMAN	Ezrin OS=Homo sapiens GN=EZR PE=1 SV=4	30	0.26124	1.20585	20.1418	20.3615	20.293	21.0729	20.183	20.4365	20.7035	20.5305
	RL6_HUMAN	60S ribosomal protein L6 OS=Homo sapiens GN=RPL6 PE=1 SV=3	19	0.261804	0.884936	20.6244	20.4497	20.1615	20.3329	20.7745	20.3385	20.8653	20.5992
	DCXR_HUMAN	L-xylulose reductase OS=Homo sapiens GN=DCXR PE=1 SV=2	9	0.262345	0.770725	17.023	17.2788	18.0319	17.7978	17.2905	16.8248	18.1554	17.0965
	ECHA_HUMAN	Trifunctional enzyme subunit alpha, mitochondrial OS=Homo sapiens GN=HADHA PE=1 SV=2	39	0.262536	1.10709	21.7807	21.625	21.6745	21.8484	21.73	21.958	21.5268	21.8677
	GOGA4_HUMAN	Golgin subfamily A member 4 OS=Homo sapiens GN=GOLGA4 PE=1 SV=1	12	0.262551	1.13081	16.3039	16.7846	16.9667	17.2356	17.0169	16.8943	17.1166	17.1992
	HNRH1_HUMAN	Heterogeneous nuclear ribonucleoprotein H OS=Homo sapiens GN=HNRNPH1 PE=1 SV=4	13	0.264601	0.874598	21.9941	21.8911	22.2136	22.3226	21.7818	21.5694	22.2162	21.6493
	AT2B4_HUMAN	Plasma membrane calcium-transporting ATPase 4 OS=Homo sapiens GN=ATP2B4 PE=1 SV=2	17	0.264618	1.17792	19.8759	19.768	19.658	20.3093	19.8162	19.8376	19.8014	20.1816
	HNRL1_HUMAN	Heterogeneous nuclear ribonucleoprotein U-like protein 1 OS=Homo sapiens GN=HNRNPUL1 PE=1 SV=2	15	0.264779	0.840262	19.0626	19.151	19.6005	19.6402	19.3511	18.7313	19.4915	18.9788
	CLUS_HUMAN	Clusterin OS=Homo sapiens GN=CLU PE=1 SV=1	4	0.264818	0.578693	13.6524	12.0168	14.7331	13.0792	13.868	13.2044	13.5858	14.3822
	C1QBP_HUMAN	Complement component 1 Q subcomponent-binding protein, mitochondrial OS=Homo sapiens GN=C1QBP PE=1 SV=1	10	0.265022	1.40943	21.0507	21.1112	20.2185	19.9393	20.215	21.1486	19.9638	21.2293
	NFXL1_HUMAN	NF-X1-type zinc finger protein NFXL1 OS=Homo sapiens GN=NFXL1 PE=1 SV=2	3	0.265182	1.38386	15.3745	15.1619	14.702	16.1232	15.2095	15.5003	15.6346	16.01
	NU160_HUMAN	Nuclear pore complex protein Nup160 OS=Homo sapiens GN=NUP160 PE=1 SV=3	19	0.26548	0.879575	18.3307	18.3376	18.9698	18.4062	18.6315	18.647	18.7721	18.5727
	ERF1_HUMAN	Eukaryotic peptide chain release factor subunit 1 OS=Homo sapiens GN=ETF1 PE=1 SV=3	4	0.265688	0.845739	15.5442	15.81	16.2044	15.9024	15.7051	15.1522	16.0475	15.6697
	PSIP1_HUMAN	PC4 and SFRS1-interacting protein OS=Homo sapiens GN=PSIP1 PE=1 SV=1	22	0.265826	1.08016	20.6836	20.6123	20.1221	20.3844	20.2803	20.2996	20.2813	20.516
	SCOT1_HUMAN	Succinyl-CoA:3-ketoacid coenzyme A transferase 1, mitochondrial OS=Homo sapiens GN=OXCT1 PE=1 SV=1	18	0.266361	1.09058	19.9334	19.9004	19.7689	19.734	19.6016	19.8828	19.5701	19.8573
	BCLF1_HUMAN	Bcl-2-associated transcription factor 1 OS=Homo sapiens GN=BCLAF1 PE=1 SV=2	20	0.266793	1.16802	19.7817	19.8575	19.8485	20.53	19.9299	19.8472	19.6091	19.8306
	RL7_HUMAN	60S ribosomal protein L7 OS=Homo sapiens GN=RPL7 PE=1 SV=1	13	0.267753	0.788649	20.333	20.2444	20.0292	20.2701	20.8478	20.0208	20.8666	20.1711
	LGAT1_HUMAN	Acyl-CoA:lysophosphatidylglycerol acyltransferase 1 OS=Homo sapiens GN=LPGAT1 PE=1 SV=1	2	0.268107	0.819696	14.6673	14.9051	14.5976	14.4295	15.354	14.6029	15.2677	14.8019
	ELOC_HUMAN	Transcription elongation factor B polypeptide 1 OS=Homo sapiens GN=TCEB1 PE=1 SV=1	2	0.268337	0.681357	15.9079	15.941	16.5387	14.7772	15.9345	15.7415	16.1575	15.8648
	STX5_HUMAN	Syntaxin-5 OS=Homo sapiens GN=STX5 PE=1 SV=2	5	0.269041	1.18386	15.7257	15.7207	15.4977	16.2603	15.4203	15.6308	15.6327	15.6386
	MAGT1_HUMAN	Magnesium transporter protein 1 OS=Homo sapiens GN=MAGT1 PE=1 SV=1	8	0.269294	1.18891	18.3889	18.5784	17.6484	17.7502	18.1438	18.072	17.3514	18.1305
	ATAD2_HUMAN	ATPase family AAA domain-containing protein 2 OS=Homo sapiens GN=ATAD2 PE=1 SV=1	3	0.270082	0.737049	15.2443	14.9633	15.3952	13.9927	15.3787	15.3806	15.1861	15.1071
	FAKD2_HUMAN	FAST kinase domain-containing protein 2, mitochondrial OS=Homo sapiens GN=FASTKD2 PE=1 SV=1	5	0.270116	0.647168	14.8375	14.9484	15.973	16.0033	16.4133	15.6549	17.0835	15.1896
	KAPCB_HUMAN	cAMP-dependent protein kinase catalytic subunit beta OS=Homo sapiens GN=PRKACB PE=1 SV=2	1	0.270626	0.482443	13.1094	13.9844	15.2943	12.9933	14.0012	13.562	15.1919	12.8508
	RL34_HUMAN	60S ribosomal protein L34 OS=Homo sapiens GN=RPL34 PE=1 SV=3	3	0.27093	0.647107	17.7271	17.3377	16.3739	16.9228	16.8001	15.1749	16.0388	14.9929
	GLYR1_HUMAN	Putative oxidoreductase GLYR1 OS=Homo sapiens GN=GLYR1 PE=1 SV=3	5	0.27097	1.14751	16.3558	16.9561	16.1474	16.3639	15.9468	15.8608	16.1121	16.1753
	QCR6_HUMAN	Cytochrome b-c1 complex subunit 6, mitochondrial OS=Homo sapiens GN=UQCRH PE=1 SV=2;sp	3	0.271074	1.53491	15.7417	15.3783	14.6127	16.4571	15.7058	16.3344	16.1007	16.4637
	KCY_HUMAN	UMP-CMP kinase OS=Homo sapiens GN=CMPK1 PE=1 SV=3	4	0.271496	1.30799	15.1134	16.0148	15.7736	15.7436	14.9524	15.8174	16.0097	15.8227
	GHC2_HUMAN	Mitochondrial glutamate carrier 2 OS=Homo sapiens GN=SLC25A18 PE=1 SV=1	1	0.271534	0.229795	13.4022	12.1972	13.6659	12.91	12.8456	13.0893	14.1806	7.41151
	ATAD1_HUMAN	ATPase family AAA domain-containing protein 1 OS=Homo sapiens GN=ATAD1 PE=1 SV=1	5	0.271618	1.5937	17.3602	17.9744	17.0758	16.8069	16.3847	18.4556	17.2226	17.496
	SOX_HUMAN	Peroxisomal sarcosine oxidase OS=Homo sapiens GN=PIPOX PE=1 SV=2	5	0.271622	1.30544	16.6484	17.6684	17.4896	17.5465	17.5432	17.3134	16.9369	17.6279
	NFIC_HUMAN	Nuclear factor 1 C-type OS=Homo sapiens GN=NFIC PE=1 SV=2	2	0.271927	1.72163	14.282	14.0983	12.9569	12.7591	13.9679	16.1068	11.9087	13.2865
	PRDX5_HUMAN	Peroxiredoxin-5, mitochondrial OS=Homo sapiens GN=PRDX5 PE=1 SV=4	7	0.27254	1.36373	16.622	16.6043	16.7423	16.7173	15.9576	17.3526	15.7994	16.2373
	TMOD3_HUMAN	Tropomodulin-3 OS=Homo sapiens GN=TMOD3 PE=1 SV=1	7	0.272649	1.25951	17.0111	17.1825	17.125	17.15	16.7624	17.8345	17.0785	17.1414
	MIC60_HUMAN	MICOS complex subunit MIC60 OS=Homo sapiens GN=IMMT PE=1 SV=1	53	0.272687	1.13324	21.4891	21.5917	21.5616	22.1261	21.5791	21.5136	21.3984	21.5186
	VDAC1_HUMAN	Voltage-dependent anion-selective channel protein 1 OS=Homo sapiens GN=VDAC1 PE=1 SV=2	18	0.272793	1.10648	21.7478	21.7507	21.5109	21.9414	21.5456	21.7454	21.4206	21.3712
	TMM70_HUMAN	Transmembrane protein 70, mitochondrial OS=Homo sapiens GN=TMEM70 PE=1 SV=2	5	0.272795	1.39212	16.6833	16.9189	16.9488	16.8479	16.8154	17.0723	15.8066	17.324
	NDUS7_HUMAN	NADH dehydrogenase [ubiquinone] iron-sulfur protein 7, mitochondrial OS=Homo sapiens GN=NDUFS7 PE=1 SV=3	3	0.272815	0.551618	17.1313	16.2951	16.1379	16.6241	16.264	15.7674	17.4006	14.8141
	RS27A_HUMAN	Ubiquitin-40S ribosomal protein S27a OS=Homo sapiens GN=RPS27A PE=1 SV=2;sp	6	0.273393	0.849027	20.1092	19.8226	18.8557	18.6557	19.7015	19.0425	19.4515	19.6527
	LSM8_HUMAN	U6 snRNA-associated Sm-like protein LSm8 OS=Homo sapiens GN=LSM8 PE=1 SV=3	5	0.273587	1.23272	15.9448	16.5283	16.8455	16.5344	16.4851	16.7271	15.868	16.561
	IMA5_HUMAN	Importin subunit alpha-5 OS=Homo sapiens GN=KPNA1 PE=1 SV=3	5	0.274811	0.86309	16.8255	17.0021	17.5312	16.9361	17.0863	16.8111	17.3303	17.1743
	SEC63_HUMAN	Translocation protein SEC63 homolog OS=Homo sapiens GN=SEC63 PE=1 SV=2	18	0.275334	1.15159	19.4854	19.8566	19.2947	19.1156	19.4108	19.5182	19.1775	19.6927
	NU1M_HUMAN	NADH-ubiquinone oxidoreductase chain 1 OS=Homo sapiens GN=MT-ND1 PE=1 SV=1	2	0.275603	0.688341	16.0959	16.4155	17.1512	15.5943	15.9881	15.832	16.8419	16.08
	MGST3_HUMAN	Microsomal glutathione S-transferase 3 OS=Homo sapiens GN=MGST3 PE=1 SV=1	5	0.275616	0.861077	16.8526	17.0061	17.3071	17.0944	17.3293	16.6926	17.2895	17.1221
	NOG1_HUMAN	Nucleolar GTP-binding protein 1 OS=Homo sapiens GN=GTPBP4 PE=1 SV=3	16	0.275658	1.18956	18.2904	18.2881	17.5504	18.2591	18.3748	18.267	18.1943	18.5974
	THOC5_HUMAN	THO complex subunit 5 homolog OS=Homo sapiens GN=THOC5 PE=1 SV=2	2	0.276695	2.41183	13.4419	12.9944	12.9086	12.5966	12.262	14.9487	10.3636	13.5169
	SMI20_HUMAN	Small integral membrane protein 20 OS=Homo sapiens GN=SMIM20 PE=1 SV=2	2	0.276756	0.22397	20.513	19.8336	20.0655	20.5537	20.2099	13.3336	20.5248	18.9578
	OFUT1_HUMAN	GDP-fucose protein O-fucosyltransferase 1 OS=Homo sapiens GN=POFUT1 PE=1 SV=1	10	0.276778	0.777374	17.0749	17.4847	18.5133	17.7551	18.0592	17.312	18.313	17.9553
	RHOG_HUMAN	Rho-related GTP-binding protein RhoG OS=Homo sapiens GN=RHOG PE=1 SV=1	7	0.277335	1.12615	18.7582	18.6926	18.735	19.1766	18.8316	18.7975	18.7596	19.1033
	SUCA_HUMAN	Succinate--CoA ligase [ADP/GDP-forming] subunit alpha, mitochondrial OS=Homo sapiens GN=SUCLG1 PE=1 SV=4	10	0.277386	0.925457	18.535	18.4013	18.9292	19.0131	18.4001	18.3273	18.4938	18.1693
	CC90B_HUMAN	Coiled-coil domain-containing protein 90B, mitochondrial OS=Homo sapiens GN=CCDC90B PE=1 SV=2	2	0.277753	1.23782	12.9681	13.0287	13.7131	14.095	13.7174	13.5786	12.6808	13.6083
	SPTC1_HUMAN	Serine palmitoyltransferase 1 OS=Homo sapiens GN=SPTLC1 PE=1 SV=1	7	0.27802	0.936931	17.1511	16.9144	17.2698	17.3303	17.4682	17.2778	17.4401	17.4308
	ODBB_HUMAN	2-oxoisovalerate dehydrogenase subunit beta, mitochondrial OS=Homo sapiens GN=BCKDHB PE=1 SV=2	2	0.278082	2.24638	13.034	12.0828	13.3514	13.849	11.833	14.9152	10.8522	12.894
	ACOX1_HUMAN	Peroxisomal acyl-coenzyme A oxidase 1 OS=Homo sapiens GN=ACOX1 PE=1 SV=3	12	0.278833	1.18392	17.9122	18.0504	17.8238	17.7961	18.0979	18.1737	17.8866	18.6746
	PARP9_HUMAN	Poly [ADP-ribose] polymerase 9 OS=Homo sapiens GN=PARP9 PE=1 SV=2	2	0.278906	1.4301	14.3014	15.0972	14.7499	14.1045	14.2666	15.1185	13.6477	14.7097
	AL3A2_HUMAN	Fatty aldehyde dehydrogenase OS=Homo sapiens GN=ALDH3A2 PE=1 SV=1	10	0.279073	0.890692	18.9092	18.7345	18.8436	18.9507	19.0053	18.9076	18.4008	17.8982
	ARF4_HUMAN	ADP-ribosylation factor 4 OS=Homo sapiens GN=ARF4 PE=1 SV=3	8	0.279395	1.07813	20.0785	20.2454	19.6231	19.4897	19.7411	19.9778	19.296	19.4599
	EIF3F_HUMAN	Eukaryotic translation initiation factor 3 subunit F OS=Homo sapiens GN=EIF3F PE=1 SV=1	6	0.279894	0.804407	16.7255	17.0568	17.6391	17.1906	17.1125	16.7867	17.3841	16.5709
	CERS6_HUMAN	Ceramide synthase 6 OS=Homo sapiens GN=CERS6 PE=1 SV=1	3	0.280101	0.411576	14.4132	14.1981	15.6476	11.6301	15.4608	14.1886	14.315	14.6968
	MYO6_HUMAN	Unconventional myosin-VI OS=Homo sapiens GN=MYO6 PE=1 SV=4	3	0.280474	1.53402	11.704	13.3168	13.8547	13.3242	14.3806	15.4809	14.1568	14.4435
	NDUS8_HUMAN	NADH dehydrogenase [ubiquinone] iron-sulfur protein 8, mitochondrial OS=Homo sapiens GN=NDUFS8 PE=1 SV=1	5	0.280834	0.854349	18.0786	17.8812	17.8763	18.1279	18.0906	17.6211	18.1755	17.6824
	CD151_HUMAN	CD151 antigen OS=Homo sapiens GN=CD151 PE=1 SV=3	2	0.280964	0.61899	17.0882	16.623	15.6724	13.4408	15.7584	15.5552	15.4445	15.5766
	NEUR1_HUMAN	Sialidase-1 OS=Homo sapiens GN=NEU1 PE=1 SV=1	2	0.28097	0.680084	11.89	12.3344	14.5999	12.9762	14.4861	13.8771	12.9243	12.4879
	F134A_HUMAN	Protein FAM134A OS=Homo sapiens GN=FAM134A PE=1 SV=3	3	0.282406	0.611229	14.5264	12.27	13.3708	12.6917	13.6668	13.762	12.2628	12.2623
	PSMD8_HUMAN	26S proteasome non-ATPase regulatory subunit 8 OS=Homo sapiens GN=PSMD8 PE=1 SV=2	2	0.282542	1.99577	10.7468	12.8008	12.718	12.4997	12.8058	12.4017	12.9707	15.5269
	RNZ2_HUMAN	Zinc phosphodiesterase ELAC protein 2 OS=Homo sapiens GN=ELAC2 PE=1 SV=2	3	0.282548	0.614281	12.8325	13.0784	15.3753	13.1324	13.868	13.3405	13.3072	13.0196
	VATA_HUMAN	V-type proton ATPase catalytic subunit A OS=Homo sapiens GN=ATP6V1A PE=1 SV=2	21	0.28256	0.908618	18.571	18.5017	18.7195	18.3622	18.6155	18.3647	18.6775	18.8019
	AIFM2_HUMAN	Apoptosis-inducing factor 2 OS=Homo sapiens GN=AIFM2 PE=1 SV=1	5	0.282567	1.15637	16.3776	16.6095	16.3867	16.6622	16.7221	16.5002	16.3884	16.9413
	CNN3_HUMAN	Calponin-3 OS=Homo sapiens GN=CNN3 PE=1 SV=1	8	0.28298	0.835866	17.1501	16.7634	16.9722	17.2937	17.2014	16.6267	17.1262	16.7313
	MPV17_HUMAN	Protein Mpv17 OS=Homo sapiens GN=MPV17 PE=1 SV=1	2	0.283041	3.27581	13.3563	14.4715	12.7245	14.1071	10.9433	16.2616	14.8894	13.9206
	HIBCH_HUMAN	3-hydroxyisobutyryl-CoA hydrolase, mitochondrial OS=Homo sapiens GN=HIBCH PE=1 SV=2	6	0.283299	1.16658	15.9236	16.4136	16.3199	16.7081	16.4284	16.155	16.2879	16.5723
	SFXN2_HUMAN	Sideroflexin-2 OS=Homo sapiens GN=SFXN2 PE=1 SV=2	4	0.283456	1.29033	14.8583	15.9355	15.979	15.6796	15.5139	15.8067	15.6976	16.098
	FIBP_HUMAN	Acidic fibroblast growth factor intracellular-binding protein OS=Homo sapiens GN=FIBP PE=1 SV=3	2	0.283527	0.796126	14.0603	14.195	14.5806	13.602	13.9761	13.975	13.7471	13.2765
	DHE3_HUMAN	Glutamate dehydrogenase 1, mitochondrial OS=Homo sapiens GN=GLUD1 PE=1 SV=2;sp	26	0.283672	0.93686	21.0198	20.8929	21.1267	21.2317	21.0305	20.7896	20.9193	20.8057
	EIF3A_HUMAN	Eukaryotic translation initiation factor 3 subunit A OS=Homo sapiens GN=EIF3A PE=1 SV=1	23	0.284457	0.821402	17.9781	18.2738	18.9893	18.232	18.4947	18.1014	18.8964	18.6161
	CAPZB_HUMAN	F-actin-capping protein subunit beta OS=Homo sapiens GN=CAPZB PE=1 SV=4	7	0.284681	0.912111	17.6827	17.6444	17.8729	17.9818	17.6787	17.4048	17.8721	17.5444
	LONM_HUMAN	Lon protease homolog, mitochondrial OS=Homo sapiens GN=LONP1 PE=1 SV=2	31	0.284809	1.11437	20.501	20.4011	20.1751	20.6532	20.5108	20.6677	20.3788	20.4685
	ECH1_HUMAN	Delta(3,5)-Delta(2,4)-dienoyl-CoA isomerase, mitochondrial OS=Homo sapiens GN=ECH1 PE=1 SV=2	9	0.28483	0.898247	18.7388	18.6764	18.7557	18.2563	18.2953	18.3422	18.3144	18.2099
	ERC2_HUMAN	ERC protein 2 OS=Homo sapiens GN=ERC2 PE=1 SV=3;sp	2	0.285693	0.45011	14.7394	15.4691	14.906	11.585	15.655	15.4185	15.0885	13.3097
	SLTM_HUMAN	SAFB-like transcription modulator OS=Homo sapiens GN=SLTM PE=1 SV=2	14	0.285909	1.17892	18.3004	18.4233	18.0302	18.758	18.316	18.1665	18.3587	18.6073
	CTR9_HUMAN	RNA polymerase-associated protein CTR9 homolog OS=Homo sapiens GN=CTR9 PE=1 SV=1	4	0.286843	0.776341	14.6707	14.2782	15.3944	14.2593	14.3624	14.2415	14.5376	14.7252
	PREB_HUMAN	Prolactin regulatory element-binding protein OS=Homo sapiens GN=PREB PE=1 SV=2	6	0.287135	1.54023	16.5151	16.2673	15.1112	15.238	15.8259	17.7867	14.5217	15.1746
	MLEC_HUMAN	Malectin OS=Homo sapiens GN=MLEC PE=1 SV=1	12	0.287138	1.06415	19.5435	19.4861	19.1548	19.2594	19.5494	19.5884	19.1023	19.375
	WBS16_HUMAN	Williams-Beuren syndrome chromosomal region 16 protein OS=Homo sapiens GN=WBSCR16 PE=1 SV=2	2	0.287421	1.25288	12.7003	12.9178	14.0125	14.1891	14.2093	14.0729	13.0718	14.1152
	TAGL2_HUMAN	Transgelin-2 OS=Homo sapiens GN=TAGLN2 PE=1 SV=3	8	0.288193	0.76561	18.2898	17.1722	18.2043	18.4488	17.5335	17.4605	18.731	18.1358
	FLOT2_HUMAN	Flotillin-2 OS=Homo sapiens GN=FLOT2 PE=1 SV=2	21	0.288257	0.909578	19.9268	19.6465	19.8971	19.5545	19.7054	19.8187	19.6685	19.6312
	KC1A_HUMAN	Casein kinase I isoform alpha OS=Homo sapiens GN=CSNK1A1 PE=1 SV=2;sp	5	0.28875	0.622876	15.2901	15.1254	15.8427	13.568	15.4193	15.3315	15.5325	15.3278
	VAMP7_HUMAN	Vesicle-associated membrane protein 7 OS=Homo sapiens GN=VAMP7 PE=1 SV=3	3	0.289001	0.813155	16.9384	16.8936	17.0298	16.0796	16.9908	16.6934	17.0674	17.1662
	SEC13_HUMAN	Protein SEC13 homolog OS=Homo sapiens GN=SEC13 PE=1 SV=3	4	0.289383	1.70643	14.431	16.7819	16.5709	16.1111	14.5936	15.5478	16.5399	16.7785
	FND3B_HUMAN	Fibronectin type III domain-containing protein 3B OS=Homo sapiens GN=FNDC3B PE=1 SV=2	4	0.289908	0.428266	13.8678	14.7791	14.8769	13.5021	15.2893	11.5943	14.0253	13.2902
	FAHD1_HUMAN	Acylpyruvase FAHD1, mitochondrial OS=Homo sapiens GN=FAHD1 PE=1 SV=2	3	0.290355	1.16879	15.2625	15.4965	15.3864	15.8126	14.3764	14.8886	15.0496	14.7772
	FSCN1_HUMAN	Fascin OS=Homo sapiens GN=FSCN1 PE=1 SV=3	18	0.290464	0.878301	18.8141	18.7018	19.0992	18.4803	18.6062	18.5739	18.7288	18.7433
	UB2G2_HUMAN	Ubiquitin-conjugating enzyme E2 G2 OS=Homo sapiens GN=UBE2G2 PE=1 SV=1	2	0.290811	1.77018	12.9465	15.1684	15.2198	14.6813	15.0851	16.6552	13.8003	13.8424
	TM205_HUMAN	Transmembrane protein 205 OS=Homo sapiens GN=TMEM205 PE=1 SV=1	4	0.291749	1.28647	18.1861	18.0137	17.4804	18.6135	18.3395	18.4037	17.7214	18.1502
	SRSF5_HUMAN	Serine/arginine-rich splicing factor 5 OS=Homo sapiens GN=SRSF5 PE=1 SV=1	6	0.291862	0.905525	16.9011	16.8109	16.8517	16.9794	16.9018	16.7031	16.7592	16.3478
	GNL3_HUMAN	Guanine nucleotide-binding protein-like 3 OS=Homo sapiens GN=GNL3 PE=1 SV=2	7	0.292294	1.11856	17.5945	17.9365	17.085	17.3403	17.5617	17.3473	17.5188	17.7824
	RUVB1_HUMAN	RuvB-like 1 OS=Homo sapiens GN=RUVBL1 PE=1 SV=1	17	0.292552	0.875893	18.7416	18.9501	19.0727	18.9438	18.8728	18.4537	19.063	18.6377
	TBB2A_HUMAN	Tubulin beta-2A chain OS=Homo sapiens GN=TUBB2A PE=1 SV=1	1	0.293426	1.2771	15.043	15.2275	15.3169	15.2162	13.993	15.1558	14.8027	14.9676
	ES1_HUMAN	ES1 protein homolog, mitochondrial OS=Homo sapiens GN=C21orf33 PE=1 SV=3	6	0.294049	1.18501	17.5423	18.1206	18.451	18.297	17.5087	18.0819	18.1817	18.1639
	RPB3_HUMAN	DNA-directed RNA polymerase II subunit RPB3 OS=Homo sapiens GN=POLR2C PE=1 SV=2	4	0.294066	2.04662	13.7948	16.2539	15.8291	14.9421	13.8934	16.2027	15.2195	15.4711
	SKT_HUMAN	Sickle tail protein homolog OS=Homo sapiens GN=KIAA1217 PE=1 SV=2	4	0.294087	1.18825	15.1974	15.1121	15.4766	15.7569	14.9967	15.0076	15.4662	16.2558
	KCC2D_HUMAN	Calcium/calmodulin-dependent protein kinase type II subunit delta OS=Homo sapiens GN=CAMK2D PE=1 SV=3	7	0.294598	1.25365	16.6759	17.2348	17.4255	17.0353	16.4711	17.2745	17.1664	17.4989
	STX16_HUMAN	Syntaxin-16 OS=Homo sapiens GN=STX16 PE=1 SV=3	3	0.294787	1.30537	13.3585	14.0378	13.3297	12.8298	12.7791	13.6362	13.2272	13.7286
	RAB1B_HUMAN	Ras-related protein Rab-1B OS=Homo sapiens GN=RAB1B PE=1 SV=1;sp	7	0.295221	1.13889	20.8909	21.1368	20.8808	21.3123	21.0393	20.797	20.5469	20.8623
	TMM33_HUMAN	Transmembrane protein 33 OS=Homo sapiens GN=TMEM33 PE=1 SV=2	8	0.295222	0.862417	18.8701	18.9163	19.151	18.8227	19.2042	18.564	19.2317	19.2999
	ROA0_HUMAN	Heterogeneous nuclear ribonucleoprotein A0 OS=Homo sapiens GN=HNRNPA0 PE=1 SV=1	13	0.295564	0.861972	19.8198	19.4747	19.7786	19.1474	19.2975	19.3114	19.2543	19.3595
	GDIB_HUMAN	Rab GDP dissociation inhibitor beta OS=Homo sapiens GN=GDI2 PE=1 SV=2	9	0.295899	1.09562	18.2324	18.3309	18.5171	18.385	18.264	18.4556	18.1161	18.4851
	GCSP_HUMAN	Glycine dehydrogenase (decarboxylating), mitochondrial OS=Homo sapiens GN=GLDC PE=1 SV=2	10	0.296085	1.27539	16.5649	16.878	17.6602	17.2672	16.9683	17.5267	16.3715	17.2967
	MUC18_HUMAN	Cell surface glycoprotein MUC18 OS=Homo sapiens GN=MCAM PE=1 SV=2	11	0.296235	0.85746	18.353	17.6776	17.8621	17.5706	18.1489	18.2975	18.4159	18.3467
	PLXA1_HUMAN	Plexin-A1 OS=Homo sapiens GN=PLXNA1 PE=1 SV=3	3	0.296558	0.552099	15.7259	16.1048	16.2484	13.4773	15.9102	15.1431	15.9578	15.689
	TM14C_HUMAN	Transmembrane protein 14C OS=Homo sapiens GN=TMEM14C PE=1 SV=1	3	0.296571	0.763245	16.9357	17.1883	18.0438	17.5982	17.321	17.1667	18.2976	17.0857
	RL1D1_HUMAN	Ribosomal L1 domain-containing protein 1 OS=Homo sapiens GN=RSL1D1 PE=1 SV=3	18	0.296611	1.21459	19.029	19.3361	18.7823	19.6788	19.2386	19.1374	19.3243	19.3437
	MET7B_HUMAN	Methyltransferase-like protein 7B OS=Homo sapiens GN=METTL7B PE=1 SV=2	5	0.297243	0.501657	16.4725	15.9813	16.69	17.4911	17.1819	15.8667	18.8945	15.919
	JAGN1_HUMAN	Protein jagunal homolog 1 OS=Homo sapiens GN=JAGN1 PE=1 SV=1	2	0.297464	1.33533	17.2102	16.7812	16.1454	16.9757	16.6254	16.847	15.6406	16.6865
	DRS7B_HUMAN	Dehydrogenase/reductase SDR family member 7B OS=Homo sapiens GN=DHRS7B PE=1 SV=2	3	0.298729	1.75744	13.2098	13.5619	13.7523	14.7127	15.3402	14.7669	14.3401	16.8548
	RM21_HUMAN	39S ribosomal protein L21, mitochondrial OS=Homo sapiens GN=MRPL21 PE=1 SV=2	3	0.299493	0.65334	16.3903	16.2723	16.2627	16.1261	16.6766	14.5904	16.2552	16.1397
	TOR1A_HUMAN	Torsin-1A OS=Homo sapiens GN=TOR1A PE=1 SV=1	8	0.300688	0.88677	18.4764	18.6913	18.9821	18.5587	18.5174	18.3419	17.9803	17.6709
	BUB3_HUMAN	Mitotic checkpoint protein BUB3 OS=Homo sapiens GN=BUB3 PE=1 SV=1	7	0.300822	0.860989	16.8621	16.6662	16.8109	17.0439	16.9837	16.6878	17.3304	16.7253
	RCOR1_HUMAN	REST corepressor 1 OS=Homo sapiens GN=RCOR1 PE=1 SV=1	5	0.300908	0.325033	16.2382	13.4451	16.3382	11.6043	13.8748	14.5532	13.9847	14.3479
	TIM50_HUMAN	Mitochondrial import inner membrane translocase subunit TIM50 OS=Homo sapiens GN=TIMM50 PE=1 SV=2	9	0.301118	0.927144	19.3444	19.1045	18.9755	19.0144	19.047	18.7667	18.8071	18.852
	KIF14_HUMAN	Kinesin-like protein KIF14 OS=Homo sapiens GN=KIF14 PE=1 SV=1	3	0.301336	0.615469	14.6106	15.0937	15.7354	13.7653	14.8976	14.8634	15.3876	14.1077
	OST48_HUMAN	Dolichyl-diphosphooligosaccharide--protein glycosyltransferase 48 kDa subunit OS=Homo sapiens GN=DDOST PE=1 SV=4	17	0.302135	1.07448	21.1368	21.3414	21.0241	21.2134	21.2951	21.1498	20.8174	20.9834
	AGK_HUMAN	Acylglycerol kinase, mitochondrial OS=Homo sapiens GN=AGK PE=1 SV=2	13	0.302301	1.15619	18.531	18.9194	18.732	18.4421	18.6265	18.9321	18.6508	19.0842
	B3A2_HUMAN	Anion exchange protein 2 OS=Homo sapiens GN=SLC4A2 PE=1 SV=4	5	0.302312	1.77705	12.8374	15.4291	15.4591	14.8071	15.9184	16.6715	16.1221	16.7473
	TBB3_HUMAN	Tubulin beta-3 chain OS=Homo sapiens GN=TUBB3 PE=1 SV=2	4	0.302542	0.753281	16.1113	16.5274	17.4517	17.0677	16.5118	16.0376	17.1728	15.98
	IF2B_HUMAN	Eukaryotic translation initiation factor 2 subunit 2 OS=Homo sapiens GN=EIF2S2 PE=1 SV=2	11	0.302746	1.20733	17.9552	17.903	17.6525	17.5428	17.4986	18.3182	17.5932	18.0229
	GP180_HUMAN	Integral membrane protein GPR180 OS=Homo sapiens GN=GPR180 PE=2 SV=1	2	0.303008	1.446	14.1035	13.4775	14.1052	15.4994	14.2516	14.7318	14.8124	15.6922
	DDX56_HUMAN	Probable ATP-dependent RNA helicase DDX56 OS=Homo sapiens GN=DDX56 PE=1 SV=1	3	0.30346	1.46466	14.6395	14.3978	13.1899	15.0138	14.7936	15.0535	14.4561	14.8162
	SCAM4_HUMAN	Secretory carrier-associated membrane protein 4 OS=Homo sapiens GN=SCAMP4 PE=1 SV=1	1	0.303509	1.66074	15.8144	15.9931	15.9488	15.7937	13.0744	15.5408	15.493	15.9304
	CDIPT_HUMAN	CDP-diacylglycerol--inositol 3-phosphatidyltransferase OS=Homo sapiens GN=CDIPT PE=1 SV=1	3	0.303518	1.30666	15.9111	16.1876	15.7062	15.886	15.7224	15.5379	14.9831	16.2548
	NAT10_HUMAN	RNA cytidine acetyltransferase OS=Homo sapiens GN=NAT10 PE=1 SV=2	22	0.303731	1.21577	18.3274	18.2805	17.602	18.5578	18.1101	18.2174	18.0431	18.1544
	VEZA_HUMAN	Vezatin OS=Homo sapiens GN=VEZT PE=1 SV=3	2	0.303785	0.598447	14.9799	14.0418	13.5184	14.3003	13.654	11.5224	14.5421	13.867
	IMDH2_HUMAN	Inosine-5-monophosphate dehydrogenase 2 OS=Homo sapiens GN=IMPDH2 PE=1 SV=2	4	0.303951	1.06003	15.4412	15.3284	15.3497	15.5486	15.0732	15.1915	15.4273	15.5594
	ROAA_HUMAN	Heterogeneous nuclear ribonucleoprotein A/B OS=Homo sapiens GN=HNRNPAB PE=1 SV=2	13	0.30444	0.861452	20.9416	21.0438	21.2142	21.2594	21.0293	20.6444	21.4664	20.8434
	RAC1_HUMAN	Ras-related C3 botulinum toxin substrate 1 OS=Homo sapiens GN=RAC1 PE=1 SV=1;sp	8	0.304517	0.910263	18.993	18.9375	19.2717	19.298	19.2244	18.7645	19.3891	19.3356
	PKD2_HUMAN	Polycystin-2 OS=Homo sapiens GN=PKD2 PE=1 SV=3	5	0.304753	1.16776	15.1267	15.4202	14.1941	14.3181	14.9426	15.6165	15.6406	15.4442
	FMR1_HUMAN	Synaptic functional regulator FMR1 OS=Homo sapiens GN=FMR1 PE=1 SV=1	9	0.304922	1.21323	16.4438	16.6301	16.6589	16.3511	16.5877	17.0853	16.5427	17.2818
	ANXA1_HUMAN	Annexin A1 OS=Homo sapiens GN=ANXA1 PE=1 SV=2	21	0.305381	1.11088	20.8394	20.8253	20.7513	20.697	20.4596	20.9432	20.815	21.0066
	NIPBL_HUMAN	Nipped-B-like protein OS=Homo sapiens GN=NIPBL PE=1 SV=2	5	0.305528	1.9544	13.7833	15.3147	12.3481	14.3877	13.9726	12.6087	13.6668	15.3266
	PESC_HUMAN	Pescadillo homolog OS=Homo sapiens GN=PES1 PE=1 SV=1	6	0.306307	1.20928	16.5733	16.2961	15.8176	16.3598	16.4541	16.5698	16.1018	16.8177
	PLAP_HUMAN	Phospholipase A-2-activating protein OS=Homo sapiens GN=PLAA PE=1 SV=2	2	0.307484	1.6268	12.2648	13.046	14.3684	13.451	11.5987	13.3116	12.7918	14.0233
	NDUF3_HUMAN	NADH dehydrogenase [ubiquinone] 1 alpha subcomplex assembly factor 3 OS=Homo sapiens GN=NDUFAF3 PE=1 SV=1	3	0.308029	0.536663	13.51	11.3997	15.3614	15.551	14.735	15.2758	15.9227	13.711
	MGAT1_HUMAN	Alpha-1,3-mannosyl-glycoprotein 2-beta-N-acetylglucosaminyltransferase OS=Homo sapiens GN=MGAT1 PE=1 SV=2	3	0.309069	0.538857	14.0652	13.5746	14.7742	12.3078	15.6575	14.1131	14.4368	15.3702
	SCFD1_HUMAN	Sec1 family domain-containing protein 1 OS=Homo sapiens GN=SCFD1 PE=1 SV=4	18	0.309077	1.08421	18.8002	18.8134	19.0637	19.3824	19.2076	19.1121	19.0878	19.3179
	FPPS_HUMAN	Farnesyl pyrophosphate synthase OS=Homo sapiens GN=FDPS PE=1 SV=4	4	0.309603	1.2956	16.8763	16.7789	17.0668	16.9703	16.3253	16.8233	15.963	17.1533
	MYH9_HUMAN	Myosin-9 OS=Homo sapiens GN=MYH9 PE=1 SV=4	106	0.309736	0.921648	22.8375	22.523	22.4934	22.6224	22.8403	22.6236	22.9331	22.8642
	RS8_HUMAN	40S ribosomal protein S8 OS=Homo sapiens GN=RPS8 PE=1 SV=2	10	0.311446	0.845453	19.3865	18.9102	18.7748	19.0141	19.3873	18.7386	18.9245	18.8414
	RAI14_HUMAN	Ankycorbin OS=Homo sapiens GN=RAI14 PE=1 SV=2	4	0.31307	0.703012	14.6895	13.5069	14.578	14.0341	13.8437	12.8499	13.1174	13.8041
	CTBP1_HUMAN	C-terminal-binding protein 1 OS=Homo sapiens GN=CTBP1 PE=1 SV=2	2	0.313203	0.560953	15.8778	14.5921	15.7451	13.367	13.5976	14.513	13.5059	12.9181
	RT15_HUMAN	28S ribosomal protein S15, mitochondrial OS=Homo sapiens GN=MRPS15 PE=1 SV=1	5	0.313587	0.923891	16.8189	16.623	16.2602	16.3461	16.601	16.5912	16.4812	16.1442
	PP1A_HUMAN	Serine/threonine-protein phosphatase PP1-alpha catalytic subunit OS=Homo sapiens GN=PPP1CA PE=1 SV=1	3	0.314175	1.20645	17.1012	16.7435	16.6498	17.2965	16.9794	17.2416	16.4914	17.0232
	MRT4_HUMAN	mRNA turnover protein 4 homolog OS=Homo sapiens GN=MRTO4 PE=1 SV=2	6	0.314827	1.19579	17.5439	17.4696	16.8838	17.2281	17.6352	17.5676	17.188	18.0176
	AR6P1_HUMAN	ADP-ribosylation factor-like protein 6-interacting protein 1 OS=Homo sapiens GN=ARL6IP1 PE=1 SV=2	4	0.315003	1.59585	18.0663	17.1893	16.8669	18.2023	17.213	17.8198	16.315	17.9472
	SRSF7_HUMAN	Serine/arginine-rich splicing factor 7 OS=Homo sapiens GN=SRSF7 PE=1 SV=1	8	0.315978	0.940132	20.2963	20.1024	20.2776	20.3344	20.2305	19.9926	20.1964	20.2151
	BAG6_HUMAN	Large proline-rich protein BAG6 OS=Homo sapiens GN=BAG6 PE=1 SV=2	3	0.316164	1.9079	13.9652	14.1546	14.1128	13.49	13.7562	14.9349	10.1338	13.1164
	NUP43_HUMAN	Nucleoporin Nup43 OS=Homo sapiens GN=NUP43 PE=1 SV=1	3	0.316625	0.641976	15.7892	13.5619	16.1881	16.2329	15.8118	15.5366	15.7822	15.6822
	LRC8C_HUMAN	Volume-regulated anion channel subunit LRRC8C OS=Homo sapiens GN=LRRC8C PE=1 SV=2	2	0.316907	1.67605	14.1104	14.9135	14.138	13.9029	14.4369	14.3679	12.1641	14.6453
	IF2B2_HUMAN	Insulin-like growth factor 2 mRNA-binding protein 2 OS=Homo sapiens GN=IGF2BP2 PE=1 SV=2	5	0.317377	1.20335	15.9087	16.693	16.2792	16.7023	16.4559	16.1875	16.569	16.6982
	RRP12_HUMAN	RRP12-like protein OS=Homo sapiens GN=RRP12 PE=1 SV=2	7	0.318035	1.1869	15.5095	16.0093	15.5342	16.1027	15.9021	15.5607	16.4831	16.745
	HDGR2_HUMAN	Hepatoma-derived growth factor-related protein 2 OS=Homo sapiens GN=HDGFRP2 PE=1 SV=1	2	0.318767	0.193641	17.4305	13.242	17.1192	17.314	16.9785	18.5496	18.5737	11.5222
	ALDOC_HUMAN	Fructose-bisphosphate aldolase C OS=Homo sapiens GN=ALDOC PE=1 SV=2	1	0.319433	1.08364	17.411	17.3961	17.411	17.3401	16.8588	17.0584	17.188	17.5378
	VIR_HUMAN	Protein virilizer homolog OS=Homo sapiens GN=KIAA1429 PE=1 SV=2	11	0.319478	1.39389	16.3521	16.5302	15.6913	15.335	16.12	16.6628	15.5823	17.1343
	CALU_HUMAN	Calumenin OS=Homo sapiens GN=CALU PE=1 SV=2	23	0.32033	1.18105	21.5266	21.3481	20.9498	20.9916	21.1941	21.536	21.1298	21.8848
	H2B2E_HUMAN	Histone H2B type 2-E OS=Homo sapiens GN=HIST2H2BE PE=1 SV=3;sp	3	0.320625	2.22698	21.22	21.7383	20.9912	21.4725	21.4328	21.0473	17.1906	21.1968
	YTHD3_HUMAN	YTH domain-containing family protein 3 OS=Homo sapiens GN=YTHDF3 PE=1 SV=1;sp	2	0.32095	1.32403	12.5218	13.0758	12.7233	13.2569	12.8613	12.3146	13.4775	14.5563
	ACD10_HUMAN	Acyl-CoA dehydrogenase family member 10 OS=Homo sapiens GN=ACAD10 PE=1 SV=1	2	0.321468	0.599663	12.8332	12.2217	15.6493	13.1675	13.7444	13.4358	12.6956	13.1464
	ARK72_HUMAN	Aflatoxin B1 aldehyde reductase member 2 OS=Homo sapiens GN=AKR7A2 PE=1 SV=3	3	0.321861	0.445195	15.2142	15.6824	16.0511	15.2639	15.7425	15.4144	16.1609	12.138
	MRM3_HUMAN	rRNA methyltransferase 3, mitochondrial OS=Homo sapiens GN=MRM3 PE=1 SV=2	5	0.32306	2.61884	11.7341	16.4696	13.5253	12.849	15.5347	15.87	16.5062	17.6675
	ACTN1_HUMAN	Alpha-actinin-1 OS=Homo sapiens GN=ACTN1 PE=1 SV=2	41	0.32371	1.07327	21.8482	21.9695	22.0031	21.9291	21.9238	21.9519	22.0997	22.4322
	ARMX1_HUMAN	Armadillo repeat-containing X-linked protein 1 OS=Homo sapiens GN=ARMCX1 PE=1 SV=1	4	0.323919	0.374251	13.567	14.4638	13.943	9.38003	15.2356	15.1836	15.2195	13.266
	ITB8_HUMAN	Integrin beta-8 OS=Homo sapiens GN=ITGB8 PE=2 SV=1	3	0.324328	0.733777	15.2623	14.9526	15.663	14.2549	15.3697	14.8631	14.9824	15.4206
	CPT1A_HUMAN	Carnitine O-palmitoyltransferase 1, liver isoform OS=Homo sapiens GN=CPT1A PE=1 SV=2	23	0.324469	1.04564	19.5933	19.7365	19.7864	19.9577	19.8583	19.8066	20.0571	20.0518
	PFKAL_HUMAN	ATP-dependent 6-phosphofructokinase, liver type OS=Homo sapiens GN=PFKL PE=1 SV=6	2	0.325616	1.68344	12.5088	13.397	13.191	12.4898	12.2624	14.655	12.3204	12.7465
	PIGU_HUMAN	Phosphatidylinositol glycan anchor biosynthesis class U protein OS=Homo sapiens GN=PIGU PE=1 SV=3	2	0.325834	1.7074	15.4957	15.0324	15.4157	15.2355	15.7603	18.0621	15.041	16.4699
	LGUL_HUMAN	Lactoylglutathione lyase OS=Homo sapiens GN=GLO1 PE=1 SV=4	4	0.32632	1.20812	15.96	16.4497	15.9713	15.5453	15.843	16.3687	15.5517	16.0533
	PSME2_HUMAN	Proteasome activator complex subunit 2 OS=Homo sapiens GN=PSME2 PE=1 SV=4	4	0.327924	0.800075	16.6959	16.8117	17.6073	16.7508	16.9723	17.1639	17.4481	16.7101
	HNRPD_HUMAN	Heterogeneous nuclear ribonucleoprotein D0 OS=Homo sapiens GN=HNRNPD PE=1 SV=1	15	0.328321	0.943701	21.1432	20.9187	21.2589	21.289	21.0284	21.0781	21.4326	21.2429
	NRCAM_HUMAN	Neuronal cell adhesion molecule OS=Homo sapiens GN=NRCAM PE=1 SV=3	2	0.328412	1.25786	14.7569	15.1245	15.4744	15.1938	13.7843	14.8658	15.329	15.4845
	CTBL1_HUMAN	Beta-catenin-like protein 1 OS=Homo sapiens GN=CTNNBL1 PE=1 SV=1	5	0.328497	0.808362	16.9668	17.415	17.8976	17.5418	17.5522	16.9696	17.7866	17.0491
	UCHL1_HUMAN	Ubiquitin carboxyl-terminal hydrolase isozyme L1 OS=Homo sapiens GN=UCHL1 PE=1 SV=2	10	0.328687	1.15272	19.172	19.314	19.2048	19.7874	18.9638	19.3087	19.2984	19.0491
	CETN2_HUMAN	Centrin-2 OS=Homo sapiens GN=CETN2 PE=1 SV=1	2	0.329773	0.757242	15.8479	16.2852	15.7568	15.4906	16.0331	15.4908	16.4039	15.1705
	NDUB4_HUMAN	NADH dehydrogenase [ubiquinone] 1 beta subcomplex subunit 4 OS=Homo sapiens GN=NDUFB4 PE=1 SV=3	2	0.32979	0.891294	16.5504	16.0178	16.5135	16.5162	16.5083	16.2636	16.5488	16.6594
	HSP76_HUMAN	Heat shock 70 kDa protein 6 OS=Homo sapiens GN=HSPA6 PE=1 SV=2	2	0.329983	3.9416	20.3699	20.4571	13.4179	20.5089	20.1313	20.4016	20.072	20.5385
	MRP4_HUMAN	Multidrug resistance-associated protein 4 OS=Homo sapiens GN=ABCC4 PE=1 SV=3	3	0.33015	0.571354	14.1645	13.9975	15.3086	12.4154	14.7321	14.7371	15.2512	15.0762
	TMEM2_HUMAN	Transmembrane protein 2 OS=Homo sapiens GN=TMEM2 PE=1 SV=1	14	0.330207	0.890816	17.0978	17.0583	17.1358	17.311	17.3362	16.9856	17.4687	17.0165
	CLCA_HUMAN	Clathrin light chain A OS=Homo sapiens GN=CLTA PE=1 SV=1	4	0.330418	0.608325	16.2212	16.1911	16.461	17.1047	16.9061	14.869	17.1504	15.7055
	MSPD2_HUMAN	Motile sperm domain-containing protein 2 OS=Homo sapiens GN=MOSPD2 PE=1 SV=1	10	0.331506	1.13405	17.6357	17.96	17.2659	17.2759	17.9987	17.844	17.1026	17.649
	KISHA_HUMAN	Protein kish-A OS=Homo sapiens GN=TMEM167A PE=1 SV=1	2	0.332183	0.720526	17.5791	18.2318	18.5883	17.3083	18.2262	17.7469	18.7859	18.0009
	HSBP1_HUMAN	Heat shock factor-binding protein 1 OS=Homo sapiens GN=HSBP1 PE=1 SV=1	2	0.332853	1.32343	13.9116	14.9236	14.2327	13.6248	14.1353	14.7057	14.4605	15.1032
	ACAD9_HUMAN	Acyl-CoA dehydrogenase family member 9, mitochondrial OS=Homo sapiens GN=ACAD9 PE=1 SV=1	18	0.333069	0.910094	19.3426	19.2282	19.2115	18.7663	19.3142	19.2004	18.9944	19.1243
	NOMO1_HUMAN	Nodal modulator 1 OS=Homo sapiens GN=NOMO1 PE=1 SV=5	1	0.333834	0.937923	20.0139	19.8789	20.1058	19.8613	20.0011	19.8758	19.989	20.1239
	AP2S1_HUMAN	AP-2 complex subunit sigma OS=Homo sapiens GN=AP2S1 PE=1 SV=2	5	0.334136	0.767817	16.5987	16.3391	16.3559	15.2698	16.5371	15.8817	15.6802	16.1566
	PSA5_HUMAN	Proteasome subunit alpha type-5 OS=Homo sapiens GN=PSMA5 PE=1 SV=3	8	0.334317	1.08077	18.1057	18.0096	18.2716	18.2687	17.7063	18.0331	17.8535	18.0739
	LYAR_HUMAN	Cell growth-regulating nucleolar protein OS=Homo sapiens GN=LYAR PE=1 SV=2	2	0.334548	1.36364	14.2288	15.3229	13.3673	14.5107	14.5564	14.2266	14.6897	14.5719
	COX15_HUMAN	Cytochrome c oxidase assembly protein COX15 homolog OS=Homo sapiens GN=COX15 PE=1 SV=1	4	0.334819	0.6532	15.4304	15.4952	15.9485	13.7867	15.7069	15.1986	15.2109	15.3584
	KAPCA_HUMAN	cAMP-dependent protein kinase catalytic subunit alpha OS=Homo sapiens GN=PRKACA PE=1 SV=2	2	0.335482	0.787	15.351	15.5324	16.3938	15.3288	15.741	15.1173	15.9264	16.0514
	IDHP_HUMAN	Isocitrate dehydrogenase [NADP], mitochondrial OS=Homo sapiens GN=IDH2 PE=1 SV=2	23	0.33556	1.05817	20.7485	20.6916	20.7083	20.6965	20.715	20.8567	20.5327	20.786
	PRRC1_HUMAN	Protein PRRC1 OS=Homo sapiens GN=PRRC1 PE=1 SV=1	2	0.335843	1.13452	14.5981	14.8798	12.3936	12.5338	13.6153	13.3871	13.3305	13.8652
	CLIC1_HUMAN	Chloride intracellular channel protein 1 OS=Homo sapiens GN=CLIC1 PE=1 SV=4	8	0.335939	1.16932	18.5655	18.3588	17.4882	17.8352	18.126	18.1774	18.2107	18.9218
	ITA2_HUMAN	Integrin alpha-2 OS=Homo sapiens GN=ITGA2 PE=1 SV=1	8	0.33632	0.903857	16.9479	17.1566	17.6731	17.3225	17.3095	16.997	17.0471	16.918
	CPNE3_HUMAN	Copine-3 OS=Homo sapiens GN=CPNE3 PE=1 SV=1;sp	1	0.33681	0.792992	14.9217	15.2152	16.5031	16.0004	15.2589	15.1962	16.5844	15.5177
	FUBP3_HUMAN	Far upstream element-binding protein 3 OS=Homo sapiens GN=FUBP3 PE=1 SV=2	11	0.337416	0.861327	17.7631	17.3576	17.9887	18.3304	17.7471	17.4355	18.1589	17.6728
	1433F_HUMAN	14-3-3 protein eta OS=Homo sapiens GN=YWHAH PE=1 SV=4	6	0.337688	1.48213	15.7186	15.3576	15.3638	16.3997	14.4529	16.1987	15.956	15.806
	MYOF_HUMAN	Myoferlin OS=Homo sapiens GN=MYOF PE=1 SV=1	99	0.338574	1.11653	22.5052	22.4756	22.0707	22.5938	22.4709	22.3814	22.3687	22.6007
	PLRG1_HUMAN	Pleiotropic regulator 1 OS=Homo sapiens GN=PLRG1 PE=1 SV=1	8	0.33897	0.916939	17.1008	16.9136	17.1489	17.2344	17.1193	16.7118	16.9173	16.9261
	EFGM_HUMAN	Elongation factor G, mitochondrial OS=Homo sapiens GN=GFM1 PE=1 SV=2	19	0.339217	0.896989	18.7367	18.6156	18.9416	18.6043	18.9852	18.5964	18.6859	18.9057
	MCCB_HUMAN	Methylcrotonoyl-CoA carboxylase beta chain, mitochondrial OS=Homo sapiens GN=MCCC2 PE=1 SV=1	18	0.339359	0.910251	19.1416	19.1791	19.4255	19.228	19.3192	18.8711	19.2116	19.2771
	MIMIT_HUMAN	Mimitin, mitochondrial OS=Homo sapiens GN=NDUFAF2 PE=1 SV=1	3	0.339574	0.503903	15.9498	12.7098	14.3641	14.1618	14.2631	15.0976	15.3988	14.0515
	M2OM_HUMAN	Mitochondrial 2-oxoglutarate/malate carrier protein OS=Homo sapiens GN=SLC25A11 PE=1 SV=3	16	0.339616	1.096	20.0517	20.4068	20.3593	20.2381	20.2997	20.2905	20.0145	20.3188
	CSK2B_HUMAN	Casein kinase II subunit beta OS=Homo sapiens GN=CSNK2B PE=1 SV=1	3	0.340289	1.64349	13.341	15.3259	16.0464	15.0071	15.5324	16.5588	15.8065	16.7014
	SAHH_HUMAN	Adenosylhomocysteinase OS=Homo sapiens GN=AHCY PE=1 SV=4	8	0.340314	1.13171	17.829	17.8375	17.9867	17.8128	17.2202	17.7286	17.5947	17.9656
	TOP2B_HUMAN	DNA topoisomerase 2-beta OS=Homo sapiens GN=TOP2B PE=1 SV=3	19	0.340558	0.888616	19.0938	18.9661	18.8053	18.8396	18.9929	18.3839	18.8167	18.8375
	GNL3L_HUMAN	Guanine nucleotide-binding protein-like 3-like protein OS=Homo sapiens GN=GNL3L PE=1 SV=1	2	0.34097	0.766993	13.4102	12.0701	15.221	14.9503	14.4267	14.2521	14.7378	14.9923
	RFC4_HUMAN	Replication factor C subunit 4 OS=Homo sapiens GN=RFC4 PE=1 SV=2	5	0.341046	0.51123	15.2709	15.3745	16.5382	13.0361	15.8753	15.3365	14.9313	14.9967
	CO052_HUMAN	Uncharacterized protein C15orf52 OS=Homo sapiens GN=C15orf52 PE=1 SV=1	2	0.341215	1.55718	12.2524	13.9359	12.4351	13.7574	13.0412	13.4468	14.2606	13.4047
	TOLIP_HUMAN	Toll-interacting protein OS=Homo sapiens GN=TOLLIP PE=1 SV=1	2	0.344663	0.768254	13.876	14.3436	14.0593	13.8324	13.7829	12.6349	13.5254	12.9113
	PDLI7_HUMAN	PDZ and LIM domain protein 7 OS=Homo sapiens GN=PDLIM7 PE=1 SV=1	6	0.345007	0.812257	15.1456	15.5261	17.1382	16.2095	16.7529	16.3818	17.8647	17.584
	RT33_HUMAN	28S ribosomal protein S33, mitochondrial OS=Homo sapiens GN=MRPS33 PE=1 SV=1	2	0.345091	0.798502	14.7206	14.1062	14.2448	14.7565	15.2926	14.4955	14.9014	14.5026
	DHB4_HUMAN	Peroxisomal multifunctional enzyme type 2 OS=Homo sapiens GN=HSD17B4 PE=1 SV=3	33	0.345249	0.892007	20.938	20.9052	21.3743	21.5375	21.2919	20.774	21.2665	20.9944
	SDC2_HUMAN	Syndecan-2 OS=Homo sapiens GN=SDC2 PE=1 SV=2	2	0.345597	0.634652	14.8778	14.7918	14.6144	14.9334	14.6113	14.0976	15.0934	12.7502
	FAS_HUMAN	Fatty acid synthase OS=Homo sapiens GN=FASN PE=1 SV=3	38	0.34586	0.908322	19.4268	19.3892	19.5578	19.0638	19.2976	19.1946	19.5018	19.5816
	SYWM_HUMAN	Tryptophan--tRNA ligase, mitochondrial OS=Homo sapiens GN=WARS2 PE=1 SV=1	3	0.346021	1.49774	14.867	14.019	14.2756	15.1756	13.8503	15.4942	14.4325	15.0678
	ACDSB_HUMAN	Short/branched chain specific acyl-CoA dehydrogenase, mitochondrial OS=Homo sapiens GN=ACADSB PE=1 SV=1	4	0.34608	0.783741	16.6355	16.3214	16.7532	17.1072	16.5797	16.3134	16.6374	15.4575
	CDK1_HUMAN	Cyclin-dependent kinase 1 OS=Homo sapiens GN=CDK1 PE=1 SV=3	3	0.346383	0.347455	15.8833	13.57	16.584	11.6273	12.5618	12.3788	12.6857	14.0382
	PRS6A_HUMAN	26S protease regulatory subunit 6A OS=Homo sapiens GN=PSMC3 PE=1 SV=3	10	0.346397	0.878477	17.9574	18.0977	18.1952	17.6008	17.5983	17.2764	17.5931	17.6215
	MIC13_HUMAN	MICOS complex subunit MIC13 OS=Homo sapiens GN=MIC13 PE=1 SV=1	2	0.346881	1.93025	12.6203	16.0739	17.5658	17.2414	16.6444	17.1611	16.7672	16.9164
	RM49_HUMAN	39S ribosomal protein L49, mitochondrial OS=Homo sapiens GN=MRPL49 PE=1 SV=1	2	0.347016	0.951168	15.4334	15.2798	15.4722	15.473	14.9663	15.0372	15.503	15.2962
	NU107_HUMAN	Nuclear pore complex protein Nup107 OS=Homo sapiens GN=NUP107 PE=1 SV=1	20	0.347283	1.12477	18.1569	18.4419	18.5018	18.2715	18.2817	18.4126	18.1523	18.6453
	IMPA3_HUMAN	Inositol monophosphatase 3 OS=Homo sapiens GN=IMPAD1 PE=1 SV=1	2	0.347458	0.901677	14.5438	14.4253	14.9769	14.5191	14.5581	14.3453	14.6231	14.815
	ADPGK_HUMAN	ADP-dependent glucokinase OS=Homo sapiens GN=ADPGK PE=1 SV=1	4	0.348163	1.18769	16.0793	16.5302	16.3439	16.168	16.7726	16.7102	16.0374	16.8175
	EPS8_HUMAN	Epidermal growth factor receptor kinase substrate 8 OS=Homo sapiens GN=EPS8 PE=1 SV=1	3	0.348884	0.622784	14.6352	14.2669	14.8732	15.0581	15.055	15.0079	15.008	12.5058
	PSB6_HUMAN	Proteasome subunit beta type-6 OS=Homo sapiens GN=PSMB6 PE=1 SV=4	2	0.349341	0.254737	14.3699	14.4173	15.5302	14.3718	14.8157	15.2595	15.3437	8.11925
	MANF_HUMAN	Mesencephalic astrocyte-derived neurotrophic factor OS=Homo sapiens GN=MANF PE=1 SV=3	5	0.3502	0.530694	15.8591	15.2925	16.1495	16.5326	15.9101	12.5815	16.5236	16.3795
	PRS6B_HUMAN	26S protease regulatory subunit 6B OS=Homo sapiens GN=PSMC4 PE=1 SV=2	9	0.350206	0.794313	17.353	17.2901	17.2561	16.0435	17.3359	17.471	17.2342	17.0457
	DDX21_HUMAN	Nucleolar RNA helicase 2 OS=Homo sapiens GN=DDX21 PE=1 SV=5	26	0.350434	1.11159	19.8547	20.2209	19.3377	19.3004	19.714	19.5831	19.5984	20.0109
	SYNE2_HUMAN	Nesprin-2 OS=Homo sapiens GN=SYNE2 PE=1 SV=3	34	0.350604	0.722661	18.6352	18.5213	18.8237	17.2564	18.7689	18.1445	18.1225	18.5536
	DNJC3_HUMAN	DnaJ homolog subfamily C member 3 OS=Homo sapiens GN=DNAJC3 PE=1 SV=1	8	0.351066	1.29623	17.3349	16.8701	16.3642	17.0409	17.3148	17.4853	16.7606	17.8754
	CPSF7_HUMAN	Cleavage and polyadenylation specificity factor subunit 7 OS=Homo sapiens GN=CPSF7 PE=1 SV=1	9	0.351158	0.886683	17.2134	16.7959	16.9566	17.209	17.0564	16.9341	17.0655	16.659
	MTX2_HUMAN	Metaxin-2 OS=Homo sapiens GN=MTX2 PE=1 SV=1	9	0.351287	1.19486	17.818	17.8683	17.6466	17.3478	17.0726	17.6363	17.0368	17.749
	S22AI_HUMAN	Solute carrier family 22 member 18 OS=Homo sapiens GN=SLC22A18 PE=1 SV=3	2	0.351563	0.622133	14.9375	14.2889	14.2804	12.0223	15.1702	14.5511	13.0354	13.8223
	EPT1_HUMAN	Ethanolaminephosphotransferase 1 OS=Homo sapiens GN=EPT1 PE=1 SV=3	2	0.351644	0.664947	15.9955	16.2778	13.3361	13.4018	15.7206	15.106	15.9741	13.8859
	RS10_HUMAN	40S ribosomal protein S10 OS=Homo sapiens GN=RPS10 PE=1 SV=1;sp	9	0.351901	0.775135	18.2539	18.8267	19.4776	18.9013	19.5759	18.5732	19.6152	19.1515
	ZNT7_HUMAN	Zinc transporter 7 OS=Homo sapiens GN=SLC30A7 PE=2 SV=1	3	0.352527	0.676119	16.0328	14.8594	16.5521	15.9149	14.8596	15.7685	16.7709	15.414
	REEP5_HUMAN	Receptor expression-enhancing protein 5 OS=Homo sapiens GN=REEP5 PE=1 SV=3	6	0.352899	1.07964	18.5469	18.5006	18.2953	18.3139	18.1952	18.2599	18.3957	18.8009
	CTNB1_HUMAN	Catenin beta-1 OS=Homo sapiens GN=CTNNB1 PE=1 SV=1	25	0.353104	0.955808	20.285	20.1197	20.3223	20.429	20.2905	20.1766	20.5278	20.4396
	PVR_HUMAN	Poliovirus receptor OS=Homo sapiens GN=PVR PE=1 SV=2	3	0.353145	1.22981	15.7512	15.3062	15.7817	16.5681	15.6474	15.8916	16.1141	16.7223
	SYLM_HUMAN	Probable leucine--tRNA ligase, mitochondrial OS=Homo sapiens GN=LARS2 PE=1 SV=2	15	0.353335	1.09367	18.0036	18.2681	18.4626	18.2393	18.0247	18.2449	18.1906	18.4459
	PDC6I_HUMAN	Programmed cell death 6-interacting protein OS=Homo sapiens GN=PDCD6IP PE=1 SV=1	8	0.354275	1.26605	15.5253	16.4403	16.1692	15.7763	15.8951	16.6908	15.814	15.8576
	VPS35_HUMAN	Vacuolar protein sorting-associated protein 35 OS=Homo sapiens GN=VPS35 PE=1 SV=2	6	0.354475	0.807079	16.1072	16.5225	16.885	15.9528	16.4562	16.2429	16.7729	16.2662
	DJC13_HUMAN	DnaJ homolog subfamily C member 13 OS=Homo sapiens GN=DNAJC13 PE=1 SV=5	7	0.354613	0.897963	21.5072	21.6086	20.8774	20.4098	21.3577	21.0334	21.7646	21.8341
	1B35_HUMAN	HLA class I histocompatibility antigen, B-35 alpha chain OS=Homo sapiens GN=HLA-B PE=1 SV=1;sp	0	0.35541	1.07745	15.0116	15.0506	15.7497	16.0447	15.9396	15.8007	16.116	16.3514
	LTOR1_HUMAN	Ragulator complex protein LAMTOR1 OS=Homo sapiens GN=LAMTOR1 PE=1 SV=2	5	0.356018	0.882317	16.0408	15.9386	17.1902	17.1881	16.8489	16.8999	17.6812	17.0119
	SENP3_HUMAN	Sentrin-specific protease 3 OS=Homo sapiens GN=SENP3 PE=1 SV=2	3	0.35672	1.08426	14.5082	14.4761	14.0453	14.4809	14.9564	14.9978	14.9475	14.9695
	SUMO2_HUMAN	Small ubiquitin-related modifier 2 OS=Homo sapiens GN=SUMO2 PE=1 SV=3;sp	1	0.357184	2.98401	13.7385	17.2728	16.2295	14.2749	16.5502	16.9403	13.0663	17.4054
	ANXA2_HUMAN	Annexin A2 OS=Homo sapiens GN=ANXA2 PE=1 SV=2;sp	36	0.35747	1.07456	23.444	23.704	23.8158	23.6453	23.4732	23.5959	23.7455	23.9483
	CNPY2_HUMAN	Protein canopy homolog 2 OS=Homo sapiens GN=CNPY2 PE=1 SV=1	8	0.357743	1.18666	18.7222	18.2955	18.2791	18.8581	18.2486	18.6786	18.3771	18.7824
	DNJA1_HUMAN	DnaJ homolog subfamily A member 1 OS=Homo sapiens GN=DNAJA1 PE=1 SV=2	9	0.35901	0.909429	17.9793	17.4897	17.8498	17.9366	17.8473	17.7039	17.7498	17.748
	PMGT2_HUMAN	Protein O-linked-mannose beta-1,4-N-acetylglucosaminyltransferase 2 OS=Homo sapiens GN=POMGNT2 PE=1 SV=1	2	0.359131	0.680516	14.6584	14.4338	14.9495	15.0744	13.7897	13.7507	13.6546	11.5721
	MPP10_HUMAN	U3 small nucleolar ribonucleoprotein protein MPP10 OS=Homo sapiens GN=MPHOSPH10 PE=1 SV=2	3	0.359219	1.63128	14.3329	14.4136	13.373	12.5365	14.6119	16.3385	13.2903	15.1435
	RAB1A_HUMAN	Ras-related protein Rab-1A OS=Homo sapiens GN=RAB1A PE=1 SV=3	7	0.359266	1.13617	19.0566	19.4152	19.268	19.6646	19.4524	19.128	19.0432	19.3493
	VKORL_HUMAN	Vitamin K epoxide reductase complex subunit 1-like protein 1 OS=Homo sapiens GN=VKORC1L1 PE=1 SV=2	3	0.359451	0.815298	17.4799	17.8227	17.693	16.7016	17.6054	17.3533	17.8803	17.6026
	NU205_HUMAN	Nuclear pore complex protein Nup205 OS=Homo sapiens GN=NUP205 PE=1 SV=3	31	0.359506	1.19325	18.9421	19.3241	18.8427	18.6034	18.8416	18.8669	18.5282	19.3799
	SYK_HUMAN	Lysine--tRNA ligase OS=Homo sapiens GN=KARS PE=1 SV=3	13	0.360707	1.16854	18.1686	18.1832	17.9359	17.6749	17.7449	18.2932	17.5991	18.196
	ABCF1_HUMAN	ATP-binding cassette sub-family F member 1 OS=Homo sapiens GN=ABCF1 PE=1 SV=2	7	0.361322	1.06517	16.938	17.0967	16.6177	16.9102	16.9574	16.9636	17.4051	17.312
	LCAP_HUMAN	Leucyl-cystinyl aminopeptidase OS=Homo sapiens GN=LNPEP PE=1 SV=3	28	0.361565	1.10114	19.3495	19.8148	19.546	19.3961	19.6287	19.677	19.7115	19.9039
	FUCO_HUMAN	Tissue alpha-L-fucosidase OS=Homo sapiens GN=FUCA1 PE=1 SV=4	3	0.361967	0.669138	17.6109	16.6629	17.5124	17.2891	18.1768	16.3305	17.1463	17.8456
	MTCH1_HUMAN	Mitochondrial carrier homolog 1 OS=Homo sapiens GN=MTCH1 PE=1 SV=1	5	0.362235	0.697212	16.6803	16.524	15.847	16.1845	16.8036	16.4506	16.8673	14.9577
	SSF1_HUMAN	Suppressor of SWI4 1 homolog OS=Homo sapiens GN=PPAN PE=2 SV=1	5	0.362968	0.618581	14.6327	15.0332	14.7462	15.1868	15.2908	13.2965	16.1167	14.4981
	LBR_HUMAN	Lamin-B receptor OS=Homo sapiens GN=LBR PE=1 SV=2	14	0.363068	1.31165	19.325	19.2764	17.9655	19.4342	18.8901	18.8075	18.9304	19.1584
	ITA7_HUMAN	Integrin alpha-7 OS=Homo sapiens GN=ITGA7 PE=1 SV=3	3	0.365573	0.44189	16.7239	17.0698	15.9124	11.4608	15.3266	15.3075	12.5166	11.9283
	PON2_HUMAN	Serum paraoxonase/arylesterase 2 OS=Homo sapiens GN=PON2 PE=1 SV=3	8	0.365651	1.14871	18.6102	18.6162	18.7214	19.0618	18.9924	18.7916	18.6968	19.3513
	NOG2_HUMAN	Nucleolar GTP-binding protein 2 OS=Homo sapiens GN=GNL2 PE=1 SV=1	7	0.365658	1.15555	16.3286	16.2949	15.7893	15.8845	16.2288	16.2108	15.7055	16.4962
	EMC7_HUMAN	ER membrane protein complex subunit 7 OS=Homo sapiens GN=EMC7 PE=1 SV=1	6	0.365668	1.18607	17.1259	17.3201	16.7112	17.3186	17.0591	16.6698	16.7462	17.3186
	ABD12_HUMAN	Monoacylglycerol lipase ABHD12 OS=Homo sapiens GN=ABHD12 PE=1 SV=2	9	0.366233	0.778435	17.7992	18.4339	18.8718	17.9767	18.7193	18.0717	18.6544	18.117
	SMD2_HUMAN	Small nuclear ribonucleoprotein Sm D2 OS=Homo sapiens GN=SNRPD2 PE=1 SV=1	10	0.366943	1.25149	19.4288	19.4525	18.7087	18.7693	18.8122	18.7845	18.7066	19.9446
	CPSF5_HUMAN	Cleavage and polyadenylation specificity factor subunit 5 OS=Homo sapiens GN=NUDT21 PE=1 SV=1	8	0.367276	1.06763	18.5975	18.8594	18.9522	18.852	18.6131	18.6005	18.6457	18.8741
	MRP1_HUMAN	Multidrug resistance-associated protein 1 OS=Homo sapiens GN=ABCC1 PE=1 SV=3	14	0.367309	0.697153	17.226	16.8437	17.2219	15.2879	17.7209	17.6538	17.0678	17.3694
	PWP2_HUMAN	Periodic tryptophan protein 2 homolog OS=Homo sapiens GN=PWP2 PE=2 SV=2	4	0.367539	0.852672	16.7764	16.8051	16.9878	16.1957	16.8267	16.4865	16.6921	16.8759
	ILVBL_HUMAN	Acetolactate synthase-like protein OS=Homo sapiens GN=ILVBL PE=1 SV=2	13	0.367812	1.18798	17.6666	17.7783	17.8063	17.4714	17.2432	18.0002	17.8167	18.2769
	CHAP1_HUMAN	Chromosome alignment-maintaining phosphoprotein 1 OS=Homo sapiens GN=CHAMP1 PE=1 SV=2	5	0.367855	0.534602	14.7417	14.8853	15.6379	15.6859	15.1402	11.6951	15.1549	14.7946
	BT2A1_HUMAN	Butyrophilin subfamily 2 member A1 OS=Homo sapiens GN=BTN2A1 PE=1 SV=3;sp	2	0.36817	1.17642	14.0844	13.8573	13.9537	13.9872	13.7819	14.1049	13.9383	14.7464
	TGFR1_HUMAN	TGF-beta receptor type-1 OS=Homo sapiens GN=TGFBR1 PE=1 SV=1;sp	2	0.368452	2.30596	11.8041	13.1971	14.0405	14.0173	14.0752	13.1986	11.5914	15.9197
	ODPB_HUMAN	Pyruvate dehydrogenase E1 component subunit beta, mitochondrial OS=Homo sapiens GN=PDHB PE=1 SV=3	14	0.368573	1.13484	20.5296	20.8138	20.581	21.1981	20.6387	20.4654	20.5864	20.5883
	RM09_HUMAN	39S ribosomal protein L9, mitochondrial OS=Homo sapiens GN=MRPL9 PE=1 SV=2	6	0.368632	0.892269	17.0421	16.9261	16.8466	16.9303	17.0738	16.4583	16.8647	16.8546
	RU17_HUMAN	U1 small nuclear ribonucleoprotein 70 kDa OS=Homo sapiens GN=SNRNP70 PE=1 SV=2	18	0.368815	1.13175	20.1006	20.1578	19.8025	20.3758	20.256	20.0374	20.0771	20.3794
	PLCB3_HUMAN	1-phosphatidylinositol 4,5-bisphosphate phosphodiesterase beta-3 OS=Homo sapiens GN=PLCB3 PE=1 SV=2	3	0.368877	0.691953	18.4089	17.6579	17.6767	17.5901	17.3989	15.578	17.0701	17.6036
	MMGT1_HUMAN	Membrane magnesium transporter 1 OS=Homo sapiens GN=MMGT1 PE=1 SV=1	2	0.369014	0.836581	15.6599	15.5259	16.2035	16.5847	16.4517	15.8398	16.8982	16.2332
	FND3A_HUMAN	Fibronectin type-III domain-containing protein 3A OS=Homo sapiens GN=FNDC3A PE=1 SV=4	2	0.36924	1.10984	15.5079	15.455	15.6128	16.1607	15.7232	15.6625	15.8815	16.0486
	TEX2_HUMAN	Testis-expressed sequence 2 protein OS=Homo sapiens GN=TEX2 PE=1 SV=2	4	0.370606	1.19198	15.4347	15.7909	15.3014	15.5897	15.8626	15.4654	15.0839	15.8499
	UBR4_HUMAN	E3 ubiquitin-protein ligase UBR4 OS=Homo sapiens GN=UBR4 PE=1 SV=1	5	0.370705	1.57724	12.3626	14.7908	14.0763	13.8515	14.5435	14.3139	14.0087	14.6646
	CSKP_HUMAN	Peripheral plasma membrane protein CASK OS=Homo sapiens GN=CASK PE=1 SV=3	9	0.371724	0.768713	16.5866	16.8657	17.1319	16.0262	16.8885	15.9902	16.9695	17.1764
	KMT2C_HUMAN	Histone-lysine N-methyltransferase 2C OS=Homo sapiens GN=KMT2C PE=1 SV=3	3	0.372139	0.67914	15.3264	15.7658	17.035	17.243	17.2068	16.1375	17.6817	15.8707
	ARL1_HUMAN	ADP-ribosylation factor-like protein 1 OS=Homo sapiens GN=ARL1 PE=1 SV=1	6	0.372407	1.19954	18.3022	18.9027	18.1969	17.8064	17.8742	18.5816	17.8028	17.9353
	RS18_HUMAN	40S ribosomal protein S18 OS=Homo sapiens GN=RPS18 PE=1 SV=3	8	0.373562	0.881674	19.0884	19.3309	19.1889	19.0506	19.5436	18.9372	19.3138	19.0894
	NU153_HUMAN	Nuclear pore complex protein Nup153 OS=Homo sapiens GN=NUP153 PE=1 SV=2	20	0.374402	1.13575	18.5894	18.6102	18.1123	18.8236	18.44	18.4099	18.5073	18.5399
	ENDD1_HUMAN	Endonuclease domain-containing 1 protein OS=Homo sapiens GN=ENDOD1 PE=1 SV=2	2	0.37504	0.609661	13.8079	14.3039	13.8879	14.0866	14.0097	12.9801	14.4002	11.8793
	JUN_HUMAN	Transcription factor AP-1 OS=Homo sapiens GN=JUN PE=1 SV=2	3	0.375395	1.37078	16.428	16.5504	15.0535	16.5787	15.6124	15.0759	15.5203	16.2293
	PRS7_HUMAN	26S protease regulatory subunit 7 OS=Homo sapiens GN=PSMC2 PE=1 SV=3	3	0.375863	0.924834	13.57	13.531	14.9576	14.6375	14.0615	14.2209	14.8978	14.6465
	RAP2B_HUMAN	Ras-related protein Rap-2b OS=Homo sapiens GN=RAP2B PE=1 SV=1	2	0.376685	1.17629	16.3339	16.497	16.5195	16.2289	16.3613	16.6141	16.1308	16.9425
	ACLY_HUMAN	ATP-citrate synthase OS=Homo sapiens GN=ACLY PE=1 SV=3	19	0.376732	0.922176	18.129	18.0536	18.1774	17.74	17.4589	17.551	18.0278	17.981
	ELMD2_HUMAN	ELMO domain-containing protein 2 OS=Homo sapiens GN=ELMOD2 PE=1 SV=1	3	0.376967	0.612783	15.9162	16.7373	15.0722	14.9669	16.09	14.8827	14.9502	12.6154
	ADDG_HUMAN	Gamma-adducin OS=Homo sapiens GN=ADD3 PE=1 SV=1	3	0.376969	1.55353	15.2576	16.0996	13.4756	13.6619	13.905	16.1205	16.4629	15.7612
	MTCH2_HUMAN	Mitochondrial carrier homolog 2 OS=Homo sapiens GN=MTCH2 PE=1 SV=1	12	0.376984	1.03939	20.054	20.1642	20.3514	20.5261	20.2287	20.2343	20.3105	20.243
	TPSN_HUMAN	Tapasin OS=Homo sapiens GN=TAPBP PE=1 SV=1	8	0.37714	1.09473	17.5677	17.8307	18.1179	18.1691	17.9549	17.7708	18.1171	18.5093
	B2MG_HUMAN	Beta-2-microglobulin OS=Homo sapiens GN=B2M PE=1 SV=1	4	0.37767	1.25356	17.2603	17.6949	17.8685	18.9185	17.8873	18.193	18.3301	17.844
	ASNS_HUMAN	Asparagine synthetase [glutamine-hydrolyzing] OS=Homo sapiens GN=ASNS PE=1 SV=4	2	0.378242	2.05785	14.2278	14.9192	14.3254	12.6891	11.5605	14.537	12.9088	15.0418
	LNP_HUMAN	Protein lunapark OS=Homo sapiens GN=LNP PE=1 SV=2	8	0.378605	1.15133	17.4242	17.4826	16.8573	17.6499	17.2504	17.2246	17.1365	17.1245
	EMC10_HUMAN	ER membrane protein complex subunit 10 OS=Homo sapiens GN=EMC10 PE=1 SV=1	2	0.378908	0.692216	17.5345	15.7997	17.0638	16.2949	16.3819	17.1385	17.3894	17.0137
	GPC6_HUMAN	Glypican-6 OS=Homo sapiens GN=GPC6 PE=1 SV=1	2	0.378935	0.524833	13.9859	13.8208	14.9107	11.3228	14.6614	14.2591	14.2067	14.6419
	GAG_HV1N5	Gag polyprotein OS=Human immunodeficiency virus type 1 group M subtype B (isolate NY5) GN=gag PE=1 SV=3;sp	0	0.379322	1.5901	12.2744	11.521	12.9487	13.1625	12.5951	13.4672	12.4903	14.8343
	1A02_HUMAN	HLA class I histocompatibility antigen, A-2 alpha chain OS=Homo sapiens GN=HLA-A PE=1 SV=1	1	0.379353	1.1263	19.5697	19.246	19.0743	19.4692	19.4057	19.6827	19.4407	19.7788
	CHMP6_HUMAN	Charged multivesicular body protein 6 OS=Homo sapiens GN=CHMP6 PE=1 SV=3	4	0.37968	1.44171	15.6291	15.1969	14.7663	16.177	15.4416	15.1534	15.459	16.8798
	VDAC3_HUMAN	Voltage-dependent anion-selective channel protein 3 OS=Homo sapiens GN=VDAC3 PE=1 SV=1	14	0.379934	0.92549	20.1918	19.8307	20.081	20.2254	19.9037	19.7048	19.6903	19.6591
	LYAG_HUMAN	Lysosomal alpha-glucosidase OS=Homo sapiens GN=GAA PE=1 SV=4	5	0.38065	0.843171	15.918	15.4721	16.4021	15.8471	16.0501	15.5966	16.1851	16.6552
	RM44_HUMAN	39S ribosomal protein L44, mitochondrial OS=Homo sapiens GN=MRPL44 PE=1 SV=1	7	0.380795	0.912311	17.6465	17.4106	17.2808	16.84	17.525	17.5296	17.08	17.2227
	IF4G2_HUMAN	Eukaryotic translation initiation factor 4 gamma 2 OS=Homo sapiens GN=EIF4G2 PE=1 SV=1	11	0.38092	0.855644	17.2463	17.6041	18.1311	17.5158	17.9741	17.4691	18.054	17.9168
	ERO1A_HUMAN	ERO1-like protein alpha OS=Homo sapiens GN=ERO1A PE=1 SV=2	11	0.381147	0.794388	18.1417	18.4092	18.6199	17.4675	18.6014	18.0595	18.3067	18.4051
	SDHA_HUMAN	Succinate dehydrogenase [ubiquinone] flavoprotein subunit, mitochondrial OS=Homo sapiens GN=SDHA PE=1 SV=2	20	0.381307	0.954658	19.47	19.2873	19.7799	19.838	19.329	19.3628	19.5245	19.3475
	TRM1L_HUMAN	TRMT1-like protein OS=Homo sapiens GN=TRMT1L PE=1 SV=2	3	0.381565	2.51058	12.6232	12.3738	14.6966	13.4964	10.5536	15.1409	10.9875	13.162
	TMED1_HUMAN	Transmembrane emp24 domain-containing protein 1 OS=Homo sapiens GN=TMED1 PE=1 SV=1	4	0.383095	1.24562	15.6676	16.5959	16.4727	16.5951	16.2331	16.9164	16.871	16.4045
	DDX27_HUMAN	Probable ATP-dependent RNA helicase DDX27 OS=Homo sapiens GN=DDX27 PE=1 SV=2	5	0.383821	1.17406	16.203	16.234	15.8223	15.7373	16.3925	16.466	15.4863	16.3929
	GDIA_PANTR	Rab GDP dissociation inhibitor alpha OS=Pan troglodytes GN=GDI1 PE=2 SV=1;sp	7	0.383842	2.31776	15.7906	16.8965	15.7101	13.7775	13.2897	15.1657	11.7193	15.521
	BDH_HUMAN	D-beta-hydroxybutyrate dehydrogenase, mitochondrial OS=Homo sapiens GN=BDH1 PE=1 SV=3	12	0.383949	1.13974	19.0385	19.0705	19.4531	19.2109	19.1245	19.4845	18.9917	19.5968
	KAP2_HUMAN	cAMP-dependent protein kinase type II-alpha regulatory subunit OS=Homo sapiens GN=PRKAR2A PE=1 SV=2	11	0.384478	1.1801	17.7017	17.9925	17.7283	17.377	17.3099	18.1076	17.833	18.0515
	RL23_HUMAN	60S ribosomal protein L23 OS=Homo sapiens GN=RPL23 PE=1 SV=1	9	0.384756	0.893575	19.5991	19.0935	18.8915	19.1163	19.122	18.7996	18.5298	18.4838
	SARNP_HUMAN	SAP domain-containing ribonucleoprotein OS=Homo sapiens GN=SARNP PE=1 SV=3	6	0.384933	1.1986	17.643	17.6815	17.1155	18.0363	17.307	17.6788	17.8518	17.5661
	STAT3_HUMAN	Signal transducer and activator of transcription 3 OS=Homo sapiens GN=STAT3 PE=1 SV=2	6	0.385715	0.845871	16.9947	16.1959	17.1505	16.8117	16.467	16.2809	16.3559	16.7136
	ILF3_HUMAN	Interleukin enhancer-binding factor 3 OS=Homo sapiens GN=ILF3 PE=1 SV=3	34	0.386314	1.10666	21.6	21.5815	21.2177	21.7791	21.4343	21.3555	21.1222	21.2428
	HMGB1_HUMAN	High mobility group protein B1 OS=Homo sapiens GN=HMGB1 PE=1 SV=3;sp	4	0.386751	1.03565	16.6839	16.7044	16.542	16.7058	16.6355	16.7245	16.8505	16.7793
	ATLA3_HUMAN	Atlastin-3 OS=Homo sapiens GN=ATL3 PE=1 SV=1	24	0.387098	1.09197	20.319	20.222	20.1116	20.4543	20.4842	20.3997	20.1557	20.5023
	YTDC1_HUMAN	YTH domain-containing protein 1 OS=Homo sapiens GN=YTHDC1 PE=1 SV=3	3	0.388116	1.18262	16.5556	16.3828	16.1934	17.0905	16.515	16.4596	16.5693	16.8682
	SFR15_HUMAN	Splicing factor, arginine/serine-rich 15 OS=Homo sapiens GN=SCAF4 PE=1 SV=3	2	0.388358	1.73865	15.4012	15.4282	15.769	16.1062	11.9526	15.0954	15.9041	15.5891
	MIPEP_HUMAN	Mitochondrial intermediate peptidase OS=Homo sapiens GN=MIPEP PE=1 SV=2	2	0.389266	0.535437	12.4498	13.4405	14.5614	14.6931	14.9623	13.2074	15.7889	12.8166
	MFAP1_HUMAN	Microfibrillar-associated protein 1 OS=Homo sapiens GN=MFAP1 PE=1 SV=2	2	0.389362	0.725412	14.6202	14.5284	14.3907	13.8949	14.4748	12.7567	14.326	14.7792
	TEFM_HUMAN	Transcription elongation factor, mitochondrial OS=Homo sapiens GN=TEFM PE=1 SV=1	2	0.389496	0.271255	12.4358	14.08	15.2775	12.6554	14.6671	14.9511	15.2664	8.43125
	DCBD2_HUMAN	Discoidin, CUB and LCCL domain-containing protein 2 OS=Homo sapiens GN=DCBLD2 PE=1 SV=1	8	0.389623	0.878036	18.0437	17.3798	17.6788	17.9272	17.6474	17.4485	18.1503	18.0141
	SYDC_HUMAN	Aspartate--tRNA ligase, cytoplasmic OS=Homo sapiens GN=DARS PE=1 SV=2	8	0.38971	0.896182	16.7738	16.7365	17.3974	16.8023	17.4376	17.5837	17.4404	17.2941
	KAD2_HUMAN	Adenylate kinase 2, mitochondrial OS=Homo sapiens GN=AK2 PE=1 SV=2	10	0.390168	0.923864	19.1724	19.0078	19.3102	19.4278	19.0062	19.0052	19.1898	18.7808
	RT16_HUMAN	28S ribosomal protein S16, mitochondrial OS=Homo sapiens GN=MRPS16 PE=1 SV=1	2	0.390318	0.808833	15.7971	15.1989	15.48	16.0879	15.748	15.0744	15.6081	15.0476
	TRAM1_HUMAN	Translocating chain-associated membrane protein 1 OS=Homo sapiens GN=TRAM1 PE=1 SV=3	4	0.390495	0.845886	16.5687	16.6828	15.959	15.0083	16.3623	16.3526	16.1984	16.0789
	ICMT_HUMAN	Protein-S-isoprenylcysteine O-methyltransferase OS=Homo sapiens GN=ICMT PE=1 SV=1	4	0.390711	1.02186	16.2326	16.3249	16.1155	16.1578	16.1122	16.0563	16.2302	16.2763
	PUF60_HUMAN	Poly(U)-binding-splicing factor PUF60 OS=Homo sapiens GN=PUF60 PE=1 SV=1	15	0.391142	0.920513	19.7975	19.8248	19.9852	19.5215	19.6934	19.5957	19.6971	19.7534
	RBM8A_HUMAN	RNA-binding protein 8A OS=Homo sapiens GN=RBM8A PE=1 SV=1	6	0.392055	1.05981	17.588	17.42	17.6848	17.8577	17.7645	17.922	17.784	17.9569
	TM9S2_HUMAN	Transmembrane 9 superfamily member 2 OS=Homo sapiens GN=TM9SF2 PE=1 SV=1	10	0.392283	0.917794	17.9654	17.6435	18.3536	18.0974	18.1091	17.959	18.0462	18.2794
	IPYR2_HUMAN	Inorganic pyrophosphatase 2, mitochondrial OS=Homo sapiens GN=PPA2 PE=1 SV=2	15	0.392675	1.12656	19.1991	19.3131	19.1478	18.8621	18.9932	19.3454	18.814	19.3211
	GNAI1_HUMAN	Guanine nucleotide-binding protein G(i) subunit alpha-1 OS=Homo sapiens GN=GNAI1 PE=1 SV=2	4	0.392707	2.95642	10.2256	16.4745	16.2363	16.3922	16.4821	16.7869	16.506	16.0517
	H15_HUMAN	Histone H1.5 OS=Homo sapiens GN=HIST1H1B PE=1 SV=3	10	0.39366	1.18441	20.158	20.2372	19.78	20.7547	20.1551	20.0737	19.5234	19.5274
	CD9_HUMAN	CD9 antigen OS=Homo sapiens GN=CD9 PE=1 SV=4	4	0.394027	1.09832	18.5434	18.4802	18.6612	19.0357	18.706	19.0713	18.62	18.4845
	NPC1_HUMAN	Niemann-Pick C1 protein OS=Homo sapiens GN=NPC1 PE=1 SV=2	5	0.39475	0.699907	16.1586	16.552	17.2159	15.4504	17.0397	16.0677	16.9297	17.2148
	RPR1B_HUMAN	Regulation of nuclear pre-mRNA domain-containing protein 1B OS=Homo sapiens GN=RPRD1B PE=1 SV=1;sp	5	0.394975	0.623943	14.5778	15.1018	15.121	14.4616	14.8611	12.252	14.8349	14.8574
	RM14_HUMAN	39S ribosomal protein L14, mitochondrial OS=Homo sapiens GN=MRPL14 PE=1 SV=1	3	0.395224	0.834969	15.743	15.1221	15.2892	15.8077	15.6493	15.2318	15.9124	15.3914
	ATPO_HUMAN	ATP synthase subunit O, mitochondrial OS=Homo sapiens GN=ATP5O PE=1 SV=1	11	0.396114	0.941793	20.3609	20.4606	20.8272	20.8378	20.3771	20.0865	20.2575	20.0916
	EFTU_HUMAN	Elongation factor Tu, mitochondrial OS=Homo sapiens GN=TUFM PE=1 SV=2	25	0.397643	1.04243	21.4204	21.3717	21.4043	21.5961	21.1388	21.274	21.2359	21.1975
	TMTC3_HUMAN	Transmembrane and TPR repeat-containing protein 3 OS=Homo sapiens GN=TMTC3 PE=1 SV=2	7	0.398776	0.846394	16.5408	15.7973	16.9586	16.4172	17.152	17.4791	17.0001	16.9955
	SPTB2_HUMAN	Spectrin beta chain, non-erythrocytic 1 OS=Homo sapiens GN=SPTBN1 PE=1 SV=2	115	0.399554	1.06965	22.5537	22.5352	22.436	22.5169	22.5386	22.483	22.33	22.7118
	C2C2L_HUMAN	C2 domain-containing protein 2-like OS=Homo sapiens GN=C2CD2L PE=1 SV=3	2	0.400972	2.12357	12.3796	15.8719	12.1549	13.0058	12.4456	14.2727	14.447	12.6226
	SDHB_HUMAN	Succinate dehydrogenase [ubiquinone] iron-sulfur subunit, mitochondrial OS=Homo sapiens GN=SDHB PE=1 SV=3	5	0.402711	0.773724	18.3695	17.3371	18.2315	17.7462	17.1307	16.4474	17.0788	17.7994
	RBP56_HUMAN	TATA-binding protein-associated factor 2N OS=Homo sapiens GN=TAF15 PE=1 SV=1	8	0.402719	0.929177	19.7542	19.5005	19.2732	19.4534	19.1303	19.0764	19.7099	19.4136
	NDUAC_HUMAN	NADH dehydrogenase [ubiquinone] 1 alpha subcomplex subunit 12 OS=Homo sapiens GN=NDUFA12 PE=1 SV=1	4	0.403111	0.733779	14.306	14.5146	15.6959	15.966	15.3526	13.6484	15.7112	15.1504
	HTSF1_HUMAN	HIV Tat-specific factor 1 OS=Homo sapiens GN=HTATSF1 PE=1 SV=1	5	0.403471	0.677555	16.4752	16.2862	15.9681	13.7406	15.2939	15.7462	15.8687	15.5864
	ADT3_HUMAN	ADP/ATP translocase 3 OS=Homo sapiens GN=SLC25A6 PE=1 SV=4	10	0.40357	1.06401	23.9203	24.0251	23.7482	24.0684	23.8149	23.6854	23.7173	23.7798
	DHC24_HUMAN	Delta(24)-sterol reductase OS=Homo sapiens GN=DHCR24 PE=1 SV=2	21	0.40395	0.908008	21.3161	21.3882	21.3795	21.462	21.7309	21.2019	21.6736	21.4911
	MYO1B_HUMAN	Unconventional myosin-Ib OS=Homo sapiens GN=MYO1B PE=1 SV=3	14	0.405733	0.862913	18.3717	18.5158	18.9386	18.1196	18.7544	18.4974	18.6954	18.7765
	ODBA_HUMAN	2-oxoisovalerate dehydrogenase subunit alpha, mitochondrial OS=Homo sapiens GN=BCKDHA PE=1 SV=2	2	0.405749	0.950595	15.6433	15.6968	15.8412	15.8603	15.7024	15.4189	15.872	15.7905
	PCCB_HUMAN	Propionyl-CoA carboxylase beta chain, mitochondrial OS=Homo sapiens GN=PCCB PE=1 SV=3	3	0.406369	1.69768	14.2892	15.8603	15.0708	13.5488	14.6121	16.6475	13.5777	14.5475
	RAB2A_HUMAN	Ras-related protein Rab-2A OS=Homo sapiens GN=RAB2A PE=1 SV=1	8	0.406481	1.0574	20.8294	20.9777	20.9106	20.9893	20.9007	20.7519	20.784	21.0278
	NOP2_HUMAN	Probable 28S rRNA (cytosine(4447)-C(5))-methyltransferase OS=Homo sapiens GN=NOP2 PE=1 SV=2	14	0.406673	1.12305	18.8674	18.8848	18.3207	18.9626	18.9226	18.7507	18.6021	18.7844
	ROA1_HUMAN	Heterogeneous nuclear ribonucleoprotein A1 OS=Homo sapiens GN=HNRNPA1 PE=1 SV=5;sp	20	0.407076	0.914865	22.4408	22.2432	22.5931	22.1201	22.2514	22.282	22.1028	22.2293
	TALDO_HUMAN	Transaldolase OS=Homo sapiens GN=TALDO1 PE=1 SV=2	6	0.407726	0.79132	16.601	15.5073	15.2666	15.8256	15.3271	15.1408	15.776	15.1465
	PRS8_HUMAN	26S protease regulatory subunit 8 OS=Homo sapiens GN=PSMC5 PE=1 SV=1	7	0.408825	0.856886	16.8733	16.0574	16.8361	16.6321	16.3592	16.6809	16.8221	16.6291
	C1TM_HUMAN	Monofunctional C1-tetrahydrofolate synthase, mitochondrial OS=Homo sapiens GN=MTHFD1L PE=1 SV=1	16	0.409599	1.04752	17.966	17.8988	17.9942	17.9584	17.5359	17.6874	17.8813	18.1006
	ATP5L_HUMAN	ATP synthase subunit g, mitochondrial OS=Homo sapiens GN=ATP5L PE=1 SV=3	5	0.410199	1.16114	17.9476	18.7778	19.5071	19.7703	18.7517	18.7147	18.7953	18.601
	RL22_HUMAN	60S ribosomal protein L22 OS=Homo sapiens GN=RPL22 PE=1 SV=2	9	0.41022	1.18883	19.4002	19.5938	18.6448	19.6088	19.1159	19.2481	19.4647	19.1731
	RMD3_HUMAN	Regulator of microtubule dynamics protein 3 OS=Homo sapiens GN=RMDN3 PE=1 SV=2	8	0.41064	0.846533	17.4335	17.9477	18.5435	18.0064	18.1907	17.7128	18.3046	17.8438
	RL32_HUMAN	60S ribosomal protein L32 OS=Homo sapiens GN=RPL32 PE=1 SV=2	11	0.411039	0.915437	18.3616	18.4688	18.5593	18.1495	18.2158	18.3108	18.5658	18.2636
	HPRT_HUMAN	Hypoxanthine-guanine phosphoribosyltransferase OS=Homo sapiens GN=HPRT1 PE=1 SV=2	5	0.411598	0.801799	16.7153	17.0973	17.5072	16.2816	16.4061	16.2673	17.2869	16.9945
	1433B_HUMAN	14-3-3 protein beta/alpha OS=Homo sapiens GN=YWHAB PE=1 SV=3	11	0.412304	1.12982	19.7252	19.397	19.4149	19.9491	19.1467	19.494	19.4407	19.5919
	ERP29_HUMAN	Endoplasmic reticulum resident protein 29 OS=Homo sapiens GN=ERP29 PE=1 SV=4	15	0.412556	0.830738	20.484	20.5626	20.6328	20.9169	20.2689	19.8039	20.7837	19.816
	SPTN1_HUMAN	Spectrin alpha chain, non-erythrocytic 1 OS=Homo sapiens GN=SPTAN1 PE=1 SV=3	130	0.412631	1.06315	22.4062	22.4545	22.3895	22.3417	22.3399	22.3315	22.2891	22.6505
	BASI_HUMAN	Basigin OS=Homo sapiens GN=BSG PE=1 SV=2	7	0.412926	1.11397	20.406	20.1679	19.9908	20.4341	20.1361	20.1448	20.0154	20.4243
	ACTY_HUMAN	Beta-centractin OS=Homo sapiens GN=ACTR1B PE=1 SV=1	1	0.413076	0.747937	14.6121	14.1713	16.3686	15.2848	14.3594	15.1964	15.0289	14.0405
	PYGB_HUMAN	Glycogen phosphorylase, brain form OS=Homo sapiens GN=PYGB PE=1 SV=5	43	0.413079	1.12431	21.5409	21.7097	21.8119	21.5032	21.2909	21.5592	21.2279	21.7756
	GRPE1_HUMAN	GrpE protein homolog 1, mitochondrial OS=Homo sapiens GN=GRPEL1 PE=1 SV=2	11	0.414442	1.26551	17.8701	17.7479	17.2053	18.3707	17.5747	18.2758	18.6787	18.2935
	U520_HUMAN	U5 small nuclear ribonucleoprotein 200 kDa helicase OS=Homo sapiens GN=SNRNP200 PE=1 SV=2	66	0.415361	0.95897	21.0808	20.8348	20.7403	20.7179	20.8789	20.8564	20.5919	20.6411
	SNAA_HUMAN	Alpha-soluble NSF attachment protein OS=Homo sapiens GN=NAPA PE=1 SV=3	10	0.416087	0.978119	18.709	18.665	19.0225	18.9735	18.8323	18.8954	18.9767	18.879
	NEST_HUMAN	Nestin OS=Homo sapiens GN=NES PE=1 SV=2	96	0.416471	1.06329	23.9313	23.7848	23.6629	23.8338	23.7128	23.7498	23.632	23.9247
	FIS1_HUMAN	Mitochondrial fission 1 protein OS=Homo sapiens GN=FIS1 PE=1 SV=2	4	0.416722	0.733531	16.9805	17.1104	16.3269	14.4916	16.5206	16.2267	16.0534	16.2643
	VATD_HUMAN	V-type proton ATPase subunit D OS=Homo sapiens GN=ATP6V1D PE=1 SV=1	2	0.416753	0.652593	14.8417	14.7924	14.9409	13.1675	12.8829	11.2747	14.5656	15.5335
	EDC4_HUMAN	Enhancer of mRNA-decapping protein 4 OS=Homo sapiens GN=EDC4 PE=1 SV=1	4	0.417381	0.631659	14.5083	15.1571	15.4563	14.6295	14.493	14.595	14.581	12.0058
	KDSR_HUMAN	3-ketodihydrosphingosine reductase OS=Homo sapiens GN=KDSR PE=1 SV=1	3	0.417909	0.75359	15.3332	14.3233	15.2033	14.0582	14.7204	15.4694	13.7205	13.4938
	RHEB_HUMAN	GTP-binding protein Rheb OS=Homo sapiens GN=RHEB PE=1 SV=1	5	0.417927	1.16743	16.3973	16.9958	16.419	16.0084	16.0752	16.198	16.3464	16.929
	LC7L3_HUMAN	Luc7-like protein 3 OS=Homo sapiens GN=LUC7L3 PE=1 SV=2	9	0.41802	1.11517	17.6122	17.5711	17.3188	17.1438	17.2314	17.4994	17.3093	17.8864
	S12A7_HUMAN	Solute carrier family 12 member 7 OS=Homo sapiens GN=SLC12A7 PE=1 SV=3	1	0.41832	2.38523	8.16405	11.1352	13.4772	11.1068	11.2888	14.8454	13.7423	14.6014
	NSF1C_HUMAN	NSFL1 cofactor p47 OS=Homo sapiens GN=NSFL1C PE=1 SV=2	2	0.418443	1.16873	13.7687	14.3206	14.7065	14.8822	13.6534	14.2618	14.9245	14.4883
	RL13_HUMAN	60S ribosomal protein L13 OS=Homo sapiens GN=RPL13 PE=1 SV=4	14	0.419042	1.10624	19.955	19.97	19.4257	19.9843	19.9007	19.726	19.6257	19.8094
	NUD19_HUMAN	Nucleoside diphosphate-linked moiety X motif 19 OS=Homo sapiens GN=NUDT19 PE=1 SV=1	6	0.419067	1.07174	16.7056	17.1179	16.8327	16.8963	16.8144	16.7908	16.9051	16.8527
	BRI3B_HUMAN	BRI3-binding protein OS=Homo sapiens GN=BRI3BP PE=1 SV=1	4	0.419091	1.15851	18.1434	17.8383	17.1663	17.8059	18.0226	17.9924	17.7419	18.2867
	SP16H_HUMAN	FACT complex subunit SPT16 OS=Homo sapiens GN=SUPT16H PE=1 SV=1	45	0.420016	1.07942	21.3876	21.2044	21.1938	21.3956	21.2584	21.3069	21.1009	21.4748
	AT2C1_HUMAN	Calcium-transporting ATPase type 2C member 1 OS=Homo sapiens GN=ATP2C1 PE=1 SV=3	6	0.421112	1.22028	16.0238	16.089	15.2454	16.4443	16.7349	16.7936	16.7515	16.5775
	RL11_HUMAN	60S ribosomal protein L11 OS=Homo sapiens GN=RPL11 PE=1 SV=2	9	0.421581	1.12196	18.916	18.9655	18.7754	19.3541	19.1187	18.8576	18.8921	19.189
	RMND1_HUMAN	Required for meiotic nuclear division protein 1 homolog OS=Homo sapiens GN=RMND1 PE=1 SV=2	2	0.421665	1.82705	13.3648	13.1702	12.894	11.99	12.6191	13.8535	12.6851	16.0274
	RAB6A_HUMAN	Ras-related protein Rab-6A OS=Homo sapiens GN=RAB6A PE=1 SV=3	10	0.422433	1.14543	19.7428	20.0389	19.7082	19.5631	19.7923	19.6722	19.2145	19.9672
	RM17_HUMAN	39S ribosomal protein L17, mitochondrial OS=Homo sapiens GN=MRPL17 PE=1 SV=1	2	0.423653	0.74365	12.8734	13.1127	13.6231	11.8452	13.1676	12.9031	13.6934	13.7873
	SCMC1_HUMAN	Calcium-binding mitochondrial carrier protein SCaMC-1 OS=Homo sapiens GN=SLC25A24 PE=1 SV=2	17	0.423873	1.10044	19.9649	20.3315	20.4864	20.1968	20.1706	20.3267	20.1154	20.4347
	SPF45_HUMAN	Splicing factor 45 OS=Homo sapiens GN=RBM17 PE=1 SV=1	3	0.423922	1.16074	13.8125	13.6046	14.2811	15.1437	14.5722	14.7923	15.2471	15.2326
	EFNB2_HUMAN	Ephrin-B2 OS=Homo sapiens GN=EFNB2 PE=1 SV=1	4	0.423936	0.922538	15.9777	15.6952	16.0519	16.1392	16.0756	15.695	16.0966	16.2072
	VA0D1_HUMAN	V-type proton ATPase subunit d 1 OS=Homo sapiens GN=ATP6V0D1 PE=1 SV=1	8	0.424102	1.16002	17.7162	17.9701	17.8662	17.5573	17.8423	17.9416	17.265	18.0773
	RT27_HUMAN	28S ribosomal protein S27, mitochondrial OS=Homo sapiens GN=MRPS27 PE=1 SV=3	12	0.425068	0.887685	18.2094	18.2625	18.2396	17.5283	18.342	18.2112	18.3403	18.442
	DHX30_HUMAN	Putative ATP-dependent RNA helicase DHX30 OS=Homo sapiens GN=DHX30 PE=1 SV=1	26	0.425995	1.04344	18.7605	18.926	18.8128	18.9532	19.1116	18.9823	19.1639	19.2328
	TSPO_HUMAN	Translocator protein OS=Homo sapiens GN=TSPO PE=1 SV=3	3	0.426761	0.519785	15.5946	16.9475	15.6821	13.4067	15.3231	15.509	17.0567	14.0171
	NH2L1_HUMAN	NHP2-like protein 1 OS=Homo sapiens GN=SNU13 PE=1 SV=3	4	0.427556	1.52332	16.0244	16.5086	16.5676	16.3063	14.1335	16.6544	16.5296	16.2146
	CLPT1_HUMAN	Cleft lip and palate transmembrane protein 1 OS=Homo sapiens GN=CLPTM1 PE=1 SV=1	12	0.42756	0.851424	18.7005	18.1667	17.9654	18.492	18.5964	18.1512	18.6709	18.1951
	EMC1_HUMAN	ER membrane protein complex subunit 1 OS=Homo sapiens GN=EMC1 PE=1 SV=1	21	0.4279	1.07522	18.8168	19.1645	19.0415	18.9344	19.2035	19.4547	19.3256	19.2523
	PSA1_HUMAN	Proteasome subunit alpha type-1 OS=Homo sapiens GN=PSMA1 PE=1 SV=1	6	0.428546	0.869828	16.806	16.8881	17.035	16.7996	16.2605	16.4196	17.2283	16.4176
	H2A2C_HUMAN	Histone H2A type 2-C OS=Homo sapiens GN=HIST2H2AC PE=1 SV=4;sp	1	0.428607	1.35704	23.3328	24.6075	24.9224	26.1957	25.497	25.019	25.2076	24.8994
	GLSK_HUMAN	Glutaminase kidney isoform, mitochondrial OS=Homo sapiens GN=GLS PE=1 SV=1	23	0.428881	1.01636	19.3369	19.3792	19.4221	19.4919	19.5487	19.5798	19.6378	19.5881
	CLP1L_HUMAN	Cleft lip and palate transmembrane protein 1-like protein OS=Homo sapiens GN=CLPTM1L PE=1 SV=1	6	0.429308	0.847294	16.7791	17.2023	17.1426	16.4462	17.4202	16.7985	17.4729	17.4115
	SRBS2_HUMAN	Sorbin and SH3 domain-containing protein 2 OS=Homo sapiens GN=SORBS2 PE=1 SV=3	25	0.429455	1.09577	19.9923	20.0806	20.1131	20.6166	20	19.7977	19.9406	20.079
	ZC3HE_HUMAN	Zinc finger CCCH domain-containing protein 14 OS=Homo sapiens GN=ZC3H14 PE=1 SV=1	6	0.429555	0.812708	15.0154	14.0243	14.7253	15.1479	14.895	14.9647	15.5763	14.8783
	RHOA_HUMAN	Transforming protein RhoA OS=Homo sapiens GN=RHOA PE=1 SV=1	6	0.429598	0.95267	19.6483	19.392	19.5888	19.5214	19.5141	19.4382	19.419	19.5389
	SCPDL_HUMAN	Saccharopine dehydrogenase-like oxidoreductase OS=Homo sapiens GN=SCCPDH PE=1 SV=1	13	0.42968	1.07777	19.108	19.1129	18.9538	19.4052	19.2944	19.3584	19.4821	19.3939
	NOMO3_HUMAN	Nodal modulator 3 OS=Homo sapiens GN=NOMO3 PE=3 SV=2;sp	1	0.429905	1.04006	13.8338	13.8445	14.6219	14.8032	14.9321	15.0631	15.2274	15.1311
	NDUS5_HUMAN	NADH dehydrogenase [ubiquinone] iron-sulfur protein 5 OS=Homo sapiens GN=NDUFS5 PE=1 SV=3	3	0.430596	0.485475	16.3502	13.3158	14.9316	16.049	15.9654	12.9473	14.7809	15.5458
	DHB11_HUMAN	Estradiol 17-beta-dehydrogenase 11 OS=Homo sapiens GN=HSD17B11 PE=1 SV=3	3	0.430624	0.816174	15.928	15.8191	15.7119	14.4846	16.1146	16.0221	15.891	16.1475
	CDK13_HUMAN	Cyclin-dependent kinase 13 OS=Homo sapiens GN=CDK13 PE=1 SV=2;sp	2	0.430941	3.21654	12.9217	9.05761	9.75208	13.0854	10.5827	14.5721	9.91135	13.1947
	H2A1J_HUMAN	Histone H2A type 1-J OS=Homo sapiens GN=HIST1H2AJ PE=1 SV=3;sp	0	0.43135	3.36137	13.0055	18.953	18.403	21.5315	18.566	19.7119	19.7534	16.5277
	RL3_HUMAN	60S ribosomal protein L3 OS=Homo sapiens GN=RPL3 PE=1 SV=2	18	0.43142	1.04031	20.342	20.4415	20.38	20.4726	20.5438	20.418	20.6284	20.7901
	INT2_HUMAN	Integrator complex subunit 2 OS=Homo sapiens GN=INTS2 PE=1 SV=2	2	0.432323	0.375585	10.7868	13.2709	15.421	10.503	13.3334	12.6511	15.16	12.6252
	MAN1_HUMAN	Inner nuclear membrane protein Man1 OS=Homo sapiens GN=LEMD3 PE=1 SV=2	4	0.433416	1.10813	15.542	15.6556	15.0273	14.7363	15.7824	16.0742	15.4814	15.9594
	PAR14_HUMAN	Poly [ADP-ribose] polymerase 14 OS=Homo sapiens GN=PARP14 PE=1 SV=3	9	0.433741	1.33816	15.1157	16.8045	16.4456	16.1885	15.7194	16.2711	15.8555	15.5531
	STX6_HUMAN	Syntaxin-6 OS=Homo sapiens GN=STX6 PE=1 SV=1	2	0.434328	0.487921	14.7467	10.8548	13.4106	12.2031	12.7492	14.4718	12.944	12.1795
	U5S1_HUMAN	116 kDa U5 small nuclear ribonucleoprotein component OS=Homo sapiens GN=EFTUD2 PE=1 SV=1	31	0.435481	0.92654	20.7924	20.647	20.8115	20.4618	20.7101	20.5326	20.4619	20.6942
	PLRKT_HUMAN	Plasminogen receptor (KT) OS=Homo sapiens GN=PLGRKT PE=1 SV=1	2	0.435886	0.464609	14.1748	14.379	15.7986	15.2359	16.0145	11.2877	13.1346	13.7962
	BAF_HUMAN	Barrier-to-autointegration factor OS=Homo sapiens GN=BANF1 PE=1 SV=1	5	0.436123	0.788059	17.044	17.2129	17.6751	17.6039	16.9927	17.0046	18.2453	16.7614
	RL27A_HUMAN	60S ribosomal protein L27a OS=Homo sapiens GN=RPL27A PE=1 SV=2	6	0.436309	0.905032	18.567	18.1123	19.1148	19.2158	18.2357	17.8497	18.2332	18.397
	OXSR1_HUMAN	Serine/threonine-protein kinase OSR1 OS=Homo sapiens GN=OXSR1 PE=1 SV=1	3	0.437328	1.35341	14.8998	15.9225	15.4415	14.6541	13.176	14.5714	15.537	15.6527
	PUM3_HUMAN	Pumilio homolog 3 OS=Homo sapiens GN=PUM3 PE=1 SV=3	12	0.437451	1.10203	17.4068	17.8192	17.3042	16.9967	17.6652	17.8411	17.5866	17.8665
	RBBP4_HUMAN	Histone-binding protein RBBP4 OS=Homo sapiens GN=RBBP4 PE=1 SV=3	6	0.437611	0.797455	18.0736	16.8165	17.5274	17.254	17.0906	17.6214	18.2088	17.9024
	LAMB1_HUMAN	Laminin subunit beta-1 OS=Homo sapiens GN=LAMB1 PE=1 SV=2	7	0.43824	0.530226	17.5904	17.4264	17.0554	13.1074	17.5833	17.4342	17.1451	17.7448
	2ABB_HUMAN	Serine/threonine-protein phosphatase 2A 55 kDa regulatory subunit B beta isoform OS=Homo sapiens GN=PPP2R2B PE=1 SV=1;sp	2	0.438457	1.75731	14.9144	14.3565	13.4581	14.996	11.5878	14.6455	14.9894	14.2053
	SK2L2_HUMAN	Superkiller viralicidic activity 2-like 2 OS=Homo sapiens GN=SKIV2L2 PE=1 SV=3	10	0.438625	0.89045	18.0024	17.9045	18.0072	17.4159	18.1455	17.8584	17.3353	17.642
	1A25_HUMAN	HLA class I histocompatibility antigen, A-25 alpha chain OS=Homo sapiens GN=HLA-A PE=1 SV=1;sp	0	0.440019	1.83717	13.9956	14.9446	14.6704	17.4396	15.8019	17.46	16.7917	14.9254
	TPX2_HUMAN	Targeting protein for Xklp2 OS=Homo sapiens GN=TPX2 PE=1 SV=2	4	0.440965	1.50999	15.3118	14.9668	14.0573	13.6936	13.114	15.6072	12.9641	13.5577
	SRRM1_HUMAN	Serine/arginine repetitive matrix protein 1 OS=Homo sapiens GN=SRRM1 PE=1 SV=2	3	0.440992	0.907349	18.24	18.3598	18.5925	18.0023	18.3536	18.2282	18.3804	18.4152
	PHIP_HUMAN	PH-interacting protein OS=Homo sapiens GN=PHIP PE=1 SV=2	13	0.441148	1.2372	17.6785	17.7749	16.4805	17.56	17.5399	16.9983	17.4113	18.0053
	MTA1_HUMAN	Metastasis-associated protein MTA1 OS=Homo sapiens GN=MTA1 PE=1 SV=2	6	0.441312	0.901847	16.7004	16.9996	17.5324	17.1182	17.2887	16.8866	17.4124	17.3333
	RAE1L_HUMAN	mRNA export factor OS=Homo sapiens GN=RAE1 PE=1 SV=1	2	0.44133	1.93927	13.9011	16.2264	15.4142	17.0706	15.2905	13.0339	13.6614	15.7583
	SUN2_HUMAN	SUN domain-containing protein 2 OS=Homo sapiens GN=SUN2 PE=1 SV=3	7	0.441564	0.91553	16.8159	16.4111	16.5534	16.7668	16.6621	16.6668	16.7005	16.3779
	RAB21_HUMAN	Ras-related protein Rab-21 OS=Homo sapiens GN=RAB21 PE=1 SV=3	9	0.441723	1.05648	18.6852	18.5532	18.3549	18.592	18.4531	18.4461	18.1897	18.4087
	FKBP9_HUMAN	Peptidyl-prolyl cis-trans isomerase FKBP9 OS=Homo sapiens GN=FKBP9 PE=1 SV=2	10	0.441824	0.886556	18.1916	18.3349	18.5055	18.6151	18.7726	18.0723	18.4127	18.1653
	KIFC1_HUMAN	Kinesin-like protein KIFC1 OS=Homo sapiens GN=KIFC1 PE=1 SV=2	2	0.44207	1.28611	12.7039	12.5885	11.3305	12.92	12.5576	12.6283	11.2955	11.2028
	CHTOP_HUMAN	Chromatin target of PRMT1 protein OS=Homo sapiens GN=CHTOP PE=1 SV=2	4	0.442631	1.21243	17.8409	17.6681	17.2195	18.3995	17.9614	17.824	17.9298	18.1716
	EIF3G_HUMAN	Eukaryotic translation initiation factor 3 subunit G OS=Homo sapiens GN=EIF3G PE=1 SV=2	2	0.442697	0.703394	15.3312	15.7176	15.7057	13.528	15.1349	14.8101	15.5107	15.5965
	KAT3_HUMAN	Kynurenine--oxoglutarate transaminase 3 OS=Homo sapiens GN=KYAT3 PE=1 SV=1	6	0.443331	1.5961	14.4209	17.1703	17.2603	16.8148	16.6922	16.1737	16.0045	16.9174
	NDUC2_HUMAN	NADH dehydrogenase [ubiquinone] 1 subunit C2 OS=Homo sapiens GN=NDUFC2 PE=1 SV=1;sp	2	0.443501	0.815719	15.6143	15.2893	15.8132	15.6844	15.9865	14.8195	15.6361	16.0815
	TXTP_HUMAN	Tricarboxylate transport protein, mitochondrial OS=Homo sapiens GN=SLC25A1 PE=1 SV=2	11	0.44366	0.871422	20.0059	20.2193	20.011	20.1726	20.3331	19.6661	20.4064	19.9044
	HMOX2_HUMAN	Heme oxygenase 2 OS=Homo sapiens GN=HMOX2 PE=1 SV=2	15	0.443867	1.11622	19.8627	19.732	19.6364	20.2008	20.0409	19.8814	19.835	20.1952
	XRP2_HUMAN	Protein XRP2 OS=Homo sapiens GN=RP2 PE=1 SV=4	3	0.443951	1.16117	16.1319	16.4423	16.2701	15.7792	16.2488	16.6565	15.8831	16.5184
	GLU2B_HUMAN	Glucosidase 2 subunit beta OS=Homo sapiens GN=PRKCSH PE=1 SV=2	18	0.444358	1.13857	21.5899	21.5505	21.0665	21.8691	21.5102	21.3627	21.2255	21.3587
	GEMI5_HUMAN	Gem-associated protein 5 OS=Homo sapiens GN=GEMIN5 PE=1 SV=3	5	0.444423	1.27734	15.3221	16.2895	15.7643	14.939	14.5973	15.3183	15.5733	16.1227
	RM23_HUMAN	39S ribosomal protein L23, mitochondrial OS=Homo sapiens GN=MRPL23 PE=1 SV=1	3	0.444481	0.732906	15.9435	16.1676	15.6349	16.1855	16.9049	15.9955	17.2771	15.6186
	NSF_HUMAN	Vesicle-fusing ATPase OS=Homo sapiens GN=NSF PE=1 SV=3	31	0.444522	1.08692	20.254	20.3131	20.361	20.2793	20.2066	20.1882	20.0037	20.5256
	RAB4A_HUMAN	Ras-related protein Rab-4A OS=Homo sapiens GN=RAB4A PE=1 SV=3	4	0.444759	1.53406	16.4171	16.0211	12.7094	15.3156	15.8369	15.4767	15.1119	15.7313
	RM01_HUMAN	39S ribosomal protein L1, mitochondrial OS=Homo sapiens GN=MRPL1 PE=1 SV=2	8	0.445189	1.10779	17.4495	17.6308	17.3185	17.9143	17.8323	17.6329	17.7327	17.7458
	T126A_HUMAN	Transmembrane protein 126A OS=Homo sapiens GN=TMEM126A PE=1 SV=1	5	0.445505	0.796534	16.0664	16.7791	17.2882	17.0042	17.3688	16.5695	17.6468	16.7047
	COR1B_HUMAN	Coronin-1B OS=Homo sapiens GN=CORO1B PE=1 SV=1	3	0.446097	0.714419	14.5144	14.85	15.9263	15.9265	15.6485	15.4924	16.08	13.9596
	ERGI1_HUMAN	Endoplasmic reticulum-Golgi intermediate compartment protein 1 OS=Homo sapiens GN=ERGIC1 PE=1 SV=1	8	0.446744	0.961862	18.2242	18.3186	18.5139	18.5015	18.5697	18.3612	18.7266	18.6287
	NRM_HUMAN	Nurim OS=Homo sapiens GN=NRM PE=1 SV=1	3	0.447976	1.55094	16.291	15.9005	15.3006	15.9375	16.0814	15.679	12.9831	15.6716
	RL17_HUMAN	60S ribosomal protein L17 OS=Homo sapiens GN=RPL17 PE=1 SV=3	9	0.44811	1.08812	19.0286	19.198	18.9146	19.4127	19.6474	19.53	19.5761	19.5135
	STXB1_HUMAN	Syntaxin-binding protein 1 OS=Homo sapiens GN=STXBP1 PE=1 SV=1	4	0.4483	1.41591	14.7206	15.7759	13.8819	12.6601	14.4319	15.3979	13.9883	15.1958
	PCAT1_HUMAN	Lysophosphatidylcholine acyltransferase 1 OS=Homo sapiens GN=LPCAT1 PE=1 SV=2	4	0.448667	1.12803	16.6317	16.2828	16.1687	16.5778	16.7927	16.8759	16.2423	16.7941
	CNN2_HUMAN	Calponin-2 OS=Homo sapiens GN=CNN2 PE=1 SV=4	2	0.450894	0.861633	12.6922	12.9182	14.1364	13.3954	13.4149	12.8778	14.4112	14.6039
	DIDO1_HUMAN	Death-inducer obliterator 1 OS=Homo sapiens GN=DIDO1 PE=1 SV=5	5	0.451472	0.797756	15.6099	16.207	16.6246	15.7656	15.8467	15.8251	16.1819	15.1615
	UBAC2_HUMAN	Ubiquitin-associated domain-containing protein 2 OS=Homo sapiens GN=UBAC2 PE=1 SV=1	3	0.451891	0.948869	16.6491	16.5522	16.629	16.3593	15.2356	15.1423	16.2151	16.3721
	CBX1_HUMAN	Chromobox protein homolog 1 OS=Homo sapiens GN=CBX1 PE=1 SV=1	8	0.452086	1.19119	18.5645	19.2315	19.0775	19.8483	19.2221	19.2845	19.6265	19.1359
	SNF5_HUMAN	SWI/SNF-related matrix-associated actin-dependent regulator of chromatin subfamily B member 1 OS=Homo sapiens GN=SMARCB1 PE=1 SV=2	5	0.452803	1.66978	15.1268	15.4237	15.4737	15.0986	13.9466	17.2279	15.515	15.2707
	SH3B4_HUMAN	SH3 domain-binding protein 4 OS=Homo sapiens GN=SH3BP4 PE=1 SV=1	4	0.453024	1.17763	16.7279	16.48	15.4097	16.4224	16.5421	16.5257	16.5044	16.6995
	NMT1_HUMAN	Glycylpeptide N-tetradecanoyltransferase 1 OS=Homo sapiens GN=NMT1 PE=1 SV=2	5	0.453126	1.36688	15.9084	15.8837	14.6345	14.0243	13.6653	15.5039	14.5666	15.1666
	EFTS_HUMAN	Elongation factor Ts, mitochondrial OS=Homo sapiens GN=TSFM PE=1 SV=2	5	0.453376	1.40721	14.5555	15.0107	16.4438	16.2053	14.736	16.8615	17.3933	17.0225
	ALG5_HUMAN	Dolichyl-phosphate beta-glucosyltransferase OS=Homo sapiens GN=ALG5 PE=1 SV=1	7	0.454069	1.23527	16.7778	17.15	16.6403	16.4557	18.0238	17.7709	16.8783	18.163
	MOES_HUMAN	Moesin OS=Homo sapiens GN=MSN PE=1 SV=3	44	0.454088	1.06423	21.9129	21.9501	22.2141	22.6078	22.1584	22.0732	22.3075	22.321
	41_HUMAN	Protein 4.1 OS=Homo sapiens GN=EPB41 PE=1 SV=4	4	0.454413	1.17386	14.8925	14.8184	14.1353	15.1413	15.2119	15.0213	15.2593	15.4431
	ABC3B_HUMAN	DNA dC->dU-editing enzyme APOBEC-3B OS=Homo sapiens GN=APOBEC3B PE=1 SV=1	4	0.454553	1.5311	15.4998	14.9492	15.1414	14.4399	14.7849	16.5839	14.0394	15.9509
	PSMD6_HUMAN	26S proteasome non-ATPase regulatory subunit 6 OS=Homo sapiens GN=PSMD6 PE=1 SV=1	11	0.454625	1.21367	17.0456	17.326	17.6045	17.5163	17.1292	16.859	16.2254	17.4209
	PRAF3_HUMAN	PRA1 family protein 3 OS=Homo sapiens GN=ARL6IP5 PE=1 SV=1	8	0.455032	1.12751	20.3465	20.6661	19.7516	19.6393	20.1946	20.0021	19.6553	20.333
	IF2M_HUMAN	Translation initiation factor IF-2, mitochondrial OS=Homo sapiens GN=MTIF2 PE=1 SV=2	3	0.455072	0.592256	14.6814	13.9699	14.7633	14.7407	14.0978	10.8897	14.5294	15.4487
	RTN3_HUMAN	Reticulon-3 OS=Homo sapiens GN=RTN3 PE=1 SV=2	5	0.456637	1.0393	18.0882	18.1535	18.5476	18.6233	18.479	18.3614	18.3726	18.5717
	CYTSB_HUMAN	Cytospin-B OS=Homo sapiens GN=SPECC1 PE=1 SV=1	2	0.456932	1.7967	12.7338	16.5433	17.3903	16.9836	16.8327	16.8248	17.125	17.1116
	H13_HUMAN	Histone H1.3 OS=Homo sapiens GN=HIST1H1D PE=1 SV=2	3	0.457256	1.99618	18.2618	19.4916	16.1565	20.2908	18.4467	18.431	19.7166	18.3572
	RAP1A_HUMAN	Ras-related protein Rap-1A OS=Homo sapiens GN=RAP1A PE=1 SV=1	2	0.457488	1.06885	16.8699	16.7985	16.1997	16.267	16.3641	16.3291	15.8472	16.2704
	CNPY3_HUMAN	Protein canopy homolog 3 OS=Homo sapiens GN=CNPY3 PE=1 SV=1	3	0.458493	0.818675	15.7649	14.4658	15.3602	15.5023	15.361	15.2794	15.4047	15.4889
	BAP31_HUMAN	B-cell receptor-associated protein 31 OS=Homo sapiens GN=BCAP31 PE=1 SV=3	20	0.459503	1.13166	21.1377	21.0384	20.5973	21.3592	21.1727	21.0124	21.1342	21.3458
	PPA6_HUMAN	Lysophosphatidic acid phosphatase type 6 OS=Homo sapiens GN=ACP6 PE=1 SV=2	2	0.460084	2.32821	13.2558	13.9632	13.6644	11.458	12.8007	14.3727	9.43486	14.2387
	GCDH_HUMAN	Glutaryl-CoA dehydrogenase, mitochondrial OS=Homo sapiens GN=GCDH PE=1 SV=1	5	0.460207	0.600474	13.7836	14.218	15.1353	11.8132	13.6405	13.7547	16.4815	16.3117
	AT1B3_HUMAN	Sodium/potassium-transporting ATPase subunit beta-3 OS=Homo sapiens GN=ATP1B3 PE=1 SV=1	11	0.460426	0.913492	20.5106	20.3911	20.5584	20.2144	20.5651	20.2037	20.1202	20.423
	COR1C_HUMAN	Coronin-1C OS=Homo sapiens GN=CORO1C PE=1 SV=1	20	0.460801	0.944927	20.942	20.8626	20.7673	20.8902	20.8155	20.4733	20.7036	20.6754
	TMM43_HUMAN	Transmembrane protein 43 OS=Homo sapiens GN=TMEM43 PE=1 SV=1	19	0.461011	1.04644	20.1758	20.4614	20.1933	20.2428	20.5059	20.4316	20.476	20.4771
	ENOA_HUMAN	Alpha-enolase OS=Homo sapiens GN=ENO1 PE=1 SV=2	28	0.461125	1.04717	21.7991	21.9745	21.999	21.9436	21.4022	21.63	21.8084	21.7267
	BAZ1A_HUMAN	Bromodomain adjacent to zinc finger domain protein 1A OS=Homo sapiens GN=BAZ1A PE=1 SV=2	3	0.461163	0.594026	14.4022	11.4102	12.0383	12.4658	13.1775	14.0886	14.6627	13.3103
	DNJC7_HUMAN	DnaJ homolog subfamily C member 7 OS=Homo sapiens GN=DNAJC7 PE=1 SV=2	2	0.462242	1.98729	15.2641	13.5771	11.6445	15.3207	15.4073	15.3254	13.439	15.4949
	EMC2_HUMAN	ER membrane protein complex subunit 2 OS=Homo sapiens GN=EMC2 PE=1 SV=1	7	0.46254	1.11947	17.6383	17.2989	17.5079	17.7787	17.6264	17.7525	17.6639	18.2575
	PDXD1_HUMAN	Pyridoxal-dependent decarboxylase domain-containing protein 1 OS=Homo sapiens GN=PDXDC1 PE=1 SV=2;sp	3	0.46376	1.62268	12.4252	14.5903	15.4277	14.8277	12.7894	11.9048	13.5901	15.7029
	RFT1_HUMAN	Protein RFT1 homolog OS=Homo sapiens GN=RFT1 PE=1 SV=1	3	0.46387	1.06886	16.8615	17.0689	16.8341	17.1715	16.8584	16.8901	17.1532	16.9609
	HAT1_HUMAN	Histone acetyltransferase type B catalytic subunit OS=Homo sapiens GN=HAT1 PE=1 SV=1	2	0.464131	0.805233	15.9717	14.5877	13.5304	13.7863	14.1232	14.2572	14.9655	14.7095
	COBA1_HUMAN	Collagen alpha-1(XI) chain OS=Homo sapiens GN=COL11A1 PE=1 SV=4	7	0.464139	0.82701	16.5991	16.8463	17.3296	16.7486	17.1298	17.4187	17.1299	16.0786
	RL36A_HUMAN	60S ribosomal protein L36a OS=Homo sapiens GN=RPL36A PE=1 SV=2	1	0.464301	1.36949	16.3079	15.9066	13.5612	15.5727	15.4215	15.7734	15.5337	15.3862
	PPT1_HUMAN	Palmitoyl-protein thioesterase 1 OS=Homo sapiens GN=PPT1 PE=1 SV=1	4	0.464339	0.605873	16.2144	15.1038	15.874	12.8654	14.2855	14.9922	15.2367	15.7575
	RBM34_HUMAN	RNA-binding protein 34 OS=Homo sapiens GN=RBM34 PE=1 SV=2	3	0.466571	0.849774	17.6551	18.2302	17.2072	16.7988	17.6537	16.9161	17.5591	17.1906
	TOR1B_HUMAN	Torsin-1B OS=Homo sapiens GN=TOR1B PE=1 SV=2	4	0.466678	0.517156	17.8169	16.1192	15.4137	13.2645	14.6099	17.0622	15.2278	12.8169
	CSTF1_HUMAN	Cleavage stimulation factor subunit 1 OS=Homo sapiens GN=CSTF1 PE=1 SV=1	5	0.466957	0.932776	15.7895	15.9912	16.7403	16.4835	15.9867	15.9697	16.1988	15.8693
	CPNE1_HUMAN	Copine-1 OS=Homo sapiens GN=CPNE1 PE=1 SV=1	2	0.466964	0.832704	15.3996	15.3622	15.9975	14.8269	15.2706	15.1137	15.2757	15.5841
	MSI2H_HUMAN	RNA-binding protein Musashi homolog 2 OS=Homo sapiens GN=MSI2 PE=1 SV=1	5	0.467143	0.690591	15.7595	16.421	17.1794	15.1374	16.2528	15.0971	16.1675	16.5675
	EPCR_HUMAN	Endothelial protein C receptor OS=Homo sapiens GN=PROCR PE=1 SV=1	2	0.46746	0.528548	12.6333	14.8932	16.3352	15.2727	15.7143	13.2768	16.9716	14.5321
	ETFD_HUMAN	Electron transfer flavoprotein-ubiquinone oxidoreductase, mitochondrial OS=Homo sapiens GN=ETFDH PE=1 SV=2	9	0.467537	1.3084	17.8283	17.7568	17.7807	17.2554	17.2265	17.7371	15.9663	17.6036
	RFC3_HUMAN	Replication factor C subunit 3 OS=Homo sapiens GN=RFC3 PE=1 SV=2	2	0.467563	0.886024	14.8748	14.3318	14.5894	15.0165	14.8827	14.5354	14.8577	14.6227
	ATP5J_HUMAN	ATP synthase-coupling factor 6, mitochondrial OS=Homo sapiens GN=ATP5J PE=1 SV=1	3	0.467953	1.27792	14.8316	16.1439	16.3629	17.1035	15.9953	16.0025	16.8379	16.1929
	RTCB_HUMAN	tRNA-splicing ligase RtcB homolog OS=Homo sapiens GN=RTCB PE=1 SV=1	14	0.467976	1.09662	17.5139	17.6256	18.0918	17.7859	17.5425	17.8341	17.7197	18.1545
	CAZA1_HUMAN	F-actin-capping protein subunit alpha-1 OS=Homo sapiens GN=CAPZA1 PE=1 SV=3	8	0.468578	1.07456	18.5237	18.7172	18.9357	19.1555	18.6054	18.8765	19.3608	19.0916
	EXD2_HUMAN	Exonuclease 3-5 domain-containing protein 2 OS=Homo sapiens GN=EXD2 PE=1 SV=2	5	0.468704	1.24108	15.4185	15.3098	15.1269	14.6039	15.0337	16.1166	14.7656	15.5608
	AATC_HUMAN	Aspartate aminotransferase, cytoplasmic OS=Homo sapiens GN=GOT1 PE=1 SV=3	4	0.468758	1.27432	15.0239	15.987	16.0212	15.313	15.578	15.6254	15.494	16.5907
	ERBIN_HUMAN	Erbin OS=Homo sapiens GN=ERBIN PE=1 SV=2	13	0.468808	0.877036	17.7821	17.4103	17.844	18.3256	18.2074	17.6603	18.3203	18.0004
	PRIO_PANTR	Major prion protein OS=Pan troglodytes GN=PRNP PE=2 SV=1;sp	2	0.468871	0.856169	16.2129	15.9692	16.2054	15.2884	16.1253	15.9871	16.0717	16.4743
	H2AW_HUMAN	Core histone macro-H2A.2 OS=Homo sapiens GN=H2AFY2 PE=1 SV=3	2	0.469975	1.16817	15.1881	15.6504	15.0197	15.6973	15.297	14.7362	14.9542	15.2721
	RALB_HUMAN	Ras-related protein Ral-B OS=Homo sapiens GN=RALB PE=1 SV=1	4	0.47205	1.05866	15.6713	15.7243	15.9409	16.2317	16.0887	15.9079	16.1028	16.2689
	TGON2_HUMAN	Trans-Golgi network integral membrane protein 2 OS=Homo sapiens GN=TGOLN2 PE=1 SV=2	4	0.472563	0.81852	15.3319	14.2497	14.3357	14.9666	15.4063	15.1183	15.8467	15.4303
	BST1_HUMAN	ADP-ribosyl cyclase/cyclic ADP-ribose hydrolase 2 OS=Homo sapiens GN=BST1 PE=1 SV=2	2	0.472864	0.89055	14.8069	14.665	14.6359	15.002	13.665	13.3907	13.8002	13.1814
	MSMO1_HUMAN	Methylsterol monooxygenase 1 OS=Homo sapiens GN=MSMO1 PE=1 SV=1	4	0.473079	0.862813	18.6252	18.0953	18.2021	17.7964	18.7954	18.3159	18.1784	18.7421
	ANLN_HUMAN	Actin-binding protein anillin OS=Homo sapiens GN=ANLN PE=1 SV=2	5	0.473135	1.81059	14.3129	13.617	14.2014	13.7075	15.0064	15.7815	12.0637	15.9043
	SR140_HUMAN	U2 snRNP-associated SURP motif-containing protein OS=Homo sapiens GN=U2SURP PE=1 SV=2	22	0.473617	0.920655	19.0094	19.042	18.9808	19.0775	19.3203	18.7741	19.1383	19.0781
	RS12_HUMAN	40S ribosomal protein S12 OS=Homo sapiens GN=RPS12 PE=1 SV=3	3	0.473619	1.52231	14.9877	15.4708	13.4245	15.9691	16.3395	16.8074	17.2391	16.1686
	RFA1_HUMAN	Replication protein A 70 kDa DNA-binding subunit OS=Homo sapiens GN=RPA1 PE=1 SV=2	7	0.474942	1.36268	15.5151	17.5387	17.2701	16.7539	17.2191	17.3316	17.4312	17.5971
	SKP1_HUMAN	S-phase kinase-associated protein 1 OS=Homo sapiens GN=SKP1 PE=1 SV=2	5	0.476072	0.768544	17.4593	16.7244	16.7835	15.2463	16.7495	17.0435	16.7203	17.1792
	SMC3_HUMAN	Structural maintenance of chromosomes protein 3 OS=Homo sapiens GN=SMC3 PE=1 SV=2	41	0.477273	0.961487	19.8438	19.6635	19.9213	19.8881	19.7876	19.6434	19.7719	19.903
	ABHGA_HUMAN	Protein ABHD16A OS=Homo sapiens GN=ABHD16A PE=1 SV=3	7	0.477336	0.597822	15.6966	16.8364	16.3497	16.7418	17.1199	15.4627	16.7132	13.8697
	CAF1B_HUMAN	Chromatin assembly factor 1 subunit B OS=Homo sapiens GN=CHAF1B PE=1 SV=1	2	0.478134	1.54197	11.6436	12.0576	13.4201	13.6175	14.6057	17.3855	13.9479	13.0559
	EIF3E_HUMAN	Eukaryotic translation initiation factor 3 subunit E OS=Homo sapiens GN=EIF3E PE=1 SV=1	10	0.478259	0.814296	17.3183	17.8193	18.4113	17.1352	18.0134	17.7727	18.3557	18.1861
	ABHDB_HUMAN	Protein ABHD11 OS=Homo sapiens GN=ABHD11 PE=1 SV=1	3	0.478273	1.64707	12.8999	16.2188	15.8097	15.1331	14.6581	15.0006	15.903	15.7978
	PRP4B_HUMAN	Serine/threonine-protein kinase PRP4 homolog OS=Homo sapiens GN=PRPF4B PE=1 SV=3	13	0.478317	1.11296	17.4434	17.8969	17.9287	17.6318	17.8662	18.3551	17.9438	17.9159
	PA1B2_HUMAN	Platelet-activating factor acetylhydrolase IB subunit beta OS=Homo sapiens GN=PAFAH1B2 PE=1 SV=1	2	0.478441	1.69906	11.498	13.9941	14.9405	13.6359	12.0357	14.278	15.1815	14.8066
	GOT1B_HUMAN	Vesicle transport protein GOT1B OS=Homo sapiens GN=GOLT1B PE=1 SV=1	4	0.478734	0.820133	16.7142	17.1856	16.783	16.7112	16.6796	16.364	17.5079	16.2797
	FARP1_HUMAN	FERM, RhoGEF and pleckstrin domain-containing protein 1 OS=Homo sapiens GN=FARP1 PE=1 SV=1	2	0.479125	0.412796	13.037	14.7184	14.3132	8.63172	13.9004	12.6817	14.5614	14.6741
	HNRPU_HUMAN	Heterogeneous nuclear ribonucleoprotein U OS=Homo sapiens GN=HNRNPU PE=1 SV=6	45	0.479509	1.0669	23.3184	23.2538	23.2094	23.6446	23.3286	23.2924	23.2305	23.2698
	MEST_HUMAN	Mesoderm-specific transcript homolog protein OS=Homo sapiens GN=MEST PE=2 SV=2	3	0.480834	0.559568	16.1183	15.9023	15.3504	11.4485	15.9392	15.9318	16.2915	17.0663
	GNAS1_HUMAN	Guanine nucleotide-binding protein G(s) subunit alpha isoforms XLas OS=Homo sapiens GN=GNAS PE=1 SV=2;sp	16	0.480874	0.952627	20.4653	20.3959	20.4521	20.226	20.4579	20.3001	20.3345	20.5078
	ACTZ_HUMAN	Alpha-centractin OS=Homo sapiens GN=ACTR1A PE=1 SV=1	4	0.48103	0.948641	16.9959	16.9029	17.1592	16.8736	16.7769	16.952	17.5618	17.4609
	IF2A_HUMAN	Eukaryotic translation initiation factor 2 subunit 1 OS=Homo sapiens GN=EIF2S1 PE=1 SV=3	8	0.48121	1.08236	17.4596	17.8508	17.994	18.2151	17.7027	17.8264	18.1991	17.9196
	BORG5_HUMAN	Cdc42 effector protein 1 OS=Homo sapiens GN=CDC42EP1 PE=1 SV=1	2	0.48149	1.40033	14.2727	14.2754	12.8678	13.6302	12.5277	14.5446	15.7794	14.9406
	RAB7A_HUMAN	Ras-related protein Rab-7a OS=Homo sapiens GN=RAB7A PE=1 SV=1	17	0.481726	1.0516	21.0826	21.133	20.8428	20.7907	21.0419	20.9985	21.0173	21.3528
	HSP74_HUMAN	Heat shock 70 kDa protein 4 OS=Homo sapiens GN=HSPA4 PE=1 SV=4	16	0.483681	1.12629	18.3296	18.531	18.7652	18.3513	18.1119	18.7317	18.6752	18.9541
	VLDLR_HUMAN	Very low-density lipoprotein receptor OS=Homo sapiens GN=VLDLR PE=1 SV=1	4	0.483776	0.687357	15.9384	16.3592	14.9307	12.5216	15.3114	14.631	14.5702	15.0754
	DOCK7_HUMAN	Dedicator of cytokinesis protein 7 OS=Homo sapiens GN=DOCK7 PE=1 SV=4	4	0.484441	1.63105	13.2913	14.8399	13.9651	14.3489	14.6781	13.0624	13.1484	15.6548
	HYEP_HUMAN	Epoxide hydrolase 1 OS=Homo sapiens GN=EPHX1 PE=1 SV=1	21	0.484461	1.10151	19.6934	20.1858	20.2018	19.9164	20.1126	20.1131	19.894	20.2445
	DCTN2_HUMAN	Dynactin subunit 2 OS=Homo sapiens GN=DCTN2 PE=1 SV=4	3	0.485432	1.62921	13.9838	15.0945	15.0681	13.4289	12.1511	14.8026	14.7081	15.4018
	DYHC1_HUMAN	Cytoplasmic dynein 1 heavy chain 1 OS=Homo sapiens GN=DYNC1H1 PE=1 SV=5	53	0.485739	1.10201	19.3393	19.6846	19.2921	19.0385	19.3553	19.307	19.0932	19.6104
	CPNS1_HUMAN	Calpain small subunit 1 OS=Homo sapiens GN=CAPNS1 PE=1 SV=1	3	0.486654	0.462764	15.0892	15.148	16.1023	13.6163	12.7802	14.9653	16.5051	12.3005
	E41L5_HUMAN	Band 4.1-like protein 5 OS=Homo sapiens GN=EPB41L5 PE=1 SV=3	4	0.486836	0.840572	15.1887	15.4402	15.9902	16.2168	16.1257	15.7361	16.8753	15.7847
	IDH3B_HUMAN	Isocitrate dehydrogenase [NAD] subunit beta, mitochondrial OS=Homo sapiens GN=IDH3B PE=1 SV=2	14	0.487001	1.08117	19.3101	19.5682	19.2916	19.6919	19.3647	19.1094	19.3758	19.4231
	CNOT1_HUMAN	CCR4-NOT transcription complex subunit 1 OS=Homo sapiens GN=CNOT1 PE=1 SV=2	5	0.488509	0.71102	14.5996	12.894	15.3613	14.0207	14.1572	14.2681	13.9912	14.9583
	TECR_HUMAN	Very-long-chain enoyl-CoA reductase OS=Homo sapiens GN=TECR PE=1 SV=1	11	0.488567	0.916156	19.3864	19.6593	19.2012	18.7511	19.3979	19.0892	19.342	19.3225
	RBM25_HUMAN	RNA-binding protein 25 OS=Homo sapiens GN=RBM25 PE=1 SV=3	13	0.488613	0.954084	18.13	17.9391	18.3604	18.1759	17.9987	18.1763	18.531	18.4576
	AP2A1_HUMAN	AP-2 complex subunit alpha-1 OS=Homo sapiens GN=AP2A1 PE=1 SV=3	16	0.488625	0.934324	18.7956	18.5559	18.4794	18.6507	18.9045	18.5362	18.7617	18.8063
	MAOM_HUMAN	NAD-dependent malic enzyme, mitochondrial OS=Homo sapiens GN=ME2 PE=1 SV=1	22	0.488696	1.05439	19.4578	19.5781	19.4347	19.76	19.4652	19.3391	19.5306	19.5166
	AAAS_HUMAN	Aladin OS=Homo sapiens GN=AAAS PE=1 SV=1	11	0.488739	1.33	18.2391	18.7667	15.7263	16.8021	17.0291	18.1728	18.4575	17.3561
	FKBP4_HUMAN	Peptidyl-prolyl cis-trans isomerase FKBP4 OS=Homo sapiens GN=FKBP4 PE=1 SV=3	8	0.4889	0.811078	17.0658	16.9438	17.0317	15.7554	16.1485	16.7297	16.9163	16.5249
	H90B2_HUMAN	Putative heat shock protein HSP 90-beta 2 OS=Homo sapiens GN=HSP90AB2P PE=1 SV=2	2	0.489689	1.31103	17.2018	18.2356	17.3634	16.2947	16.3798	16.9606	17.3937	18.4107
	CAZA2_HUMAN	F-actin-capping protein subunit alpha-2 OS=Homo sapiens GN=CAPZA2 PE=1 SV=3	5	0.489894	1.15669	15.9059	15.8191	16.2702	16.3094	16.3995	16.2808	16.7503	17.7566
	SYHC_HUMAN	Histidine--tRNA ligase, cytoplasmic OS=Homo sapiens GN=HARS PE=1 SV=2	1	0.490265	1.69982	12.3951	12.1403	12.8361	12.1221	10.8215	14.4312	13.6724	14.0932
	YMEL1_HUMAN	ATP-dependent zinc metalloprotease YME1L1 OS=Homo sapiens GN=YME1L1 PE=1 SV=2	2	0.490787	0.547762	15.3873	15.5319	15.1454	14.7049	16.0636	11.9733	14.7204	15.6331
	LUZP1_HUMAN	Leucine zipper protein 1 OS=Homo sapiens GN=LUZP1 PE=1 SV=2	2	0.490833	1.62626	12.2085	15.3834	14.7573	14.2752	14.081	13.3354	12.657	13.5161
	EXOC5_HUMAN	Exocyst complex component 5 OS=Homo sapiens GN=EXOC5 PE=1 SV=1	2	0.490859	0.74503	12.0554	12.9786	13.7041	12.2409	13.4307	12.3093	12.9897	12.9525
	PSN1_HUMAN	Presenilin-1 OS=Homo sapiens GN=PSEN1 PE=1 SV=1;sp	2	0.49114	0.861856	14.9575	14.1904	13.7893	14.3335	15.0464	14.7228	14.2072	13.8958
	NECT2_HUMAN	Nectin-2 OS=Homo sapiens GN=NECTIN2 PE=1 SV=1	3	0.491301	1.79804	14.9011	14.0209	15.9917	14.8306	12.6504	15.1662	14.6958	17.607
	RT34_HUMAN	28S ribosomal protein S34, mitochondrial OS=Homo sapiens GN=MRPS34 PE=1 SV=2	6	0.491872	0.848119	17.2865	17.9384	18.159	17.4619	17.6595	17.2989	18.2357	17.6908
	ECM29_HUMAN	Proteasome-associated protein ECM29 homolog OS=Homo sapiens GN=ECM29 PE=1 SV=2	5	0.493419	0.483049	16.4262	16.7474	16.9287	12.4218	14.0909	15.7951	16.7474	15.0299
	PSD13_HUMAN	26S proteasome non-ATPase regulatory subunit 13 OS=Homo sapiens GN=PSMD13 PE=1 SV=2	10	0.493513	0.765523	17.6677	17.9331	18.2817	16.4404	17.6313	17.4456	17.7948	18.0147
	TMED4_HUMAN	Transmembrane emp24 domain-containing protein 4 OS=Homo sapiens GN=TMED4 PE=1 SV=1	3	0.495371	0.882789	16.6841	16.1055	16.89	17.0051	16.9963	16.423	17.015	17.3324
	VMP1_HUMAN	Vacuole membrane protein 1 OS=Homo sapiens GN=VMP1 PE=1 SV=1	2	0.495676	0.591337	16.7728	17.2532	16.3662	12.6816	16.8168	16.8596	16.0218	16.1513
	PSB2_HUMAN	Proteasome subunit beta type-2 OS=Homo sapiens GN=PSMB2 PE=1 SV=1	5	0.496076	1.69945	16.7752	16.9443	17.2488	16.6345	16.1656	19.8626	16.7758	16.5843
	RL5_HUMAN	60S ribosomal protein L5 OS=Homo sapiens GN=RPL5 PE=1 SV=3	12	0.496089	1.0527	19.4078	19.3437	19.2423	19.5857	19.5436	19.4809	19.5941	19.6739
	RS17_HUMAN	40S ribosomal protein S17 OS=Homo sapiens GN=RPS17 PE=1 SV=2	7	0.496824	0.90421	17.4219	17.6369	18.4212	18.0166	18.1452	18.2839	18.9408	18.4106
	MBB1A_HUMAN	Myb-binding protein 1A OS=Homo sapiens GN=MYBBP1A PE=1 SV=2	25	0.49706	1.09562	18.6371	18.5504	17.8469	18.4559	18.3098	18.1677	18.4609	18.6078
	PGRC2_HUMAN	Membrane-associated progesterone receptor component 2 OS=Homo sapiens GN=PGRMC2 PE=1 SV=1	4	0.497382	1.0561	19.1337	19.0807	18.576	18.4439	18.6591	18.8586	18.4274	18.7278
	BAK_HUMAN	Bcl-2 homologous antagonist/killer OS=Homo sapiens GN=BAK1 PE=1 SV=1	2	0.497901	1.90598	13.129	13.3761	12.6937	10.8562	11.287	15.2636	14.336	15.6718
	SON_HUMAN	Protein SON OS=Homo sapiens GN=SON PE=1 SV=4	13	0.498595	1.06337	17.8507	17.8875	17.6528	17.981	18.0079	17.7997	17.6404	17.8381
	SUCB1_HUMAN	Succinate--CoA ligase [ADP-forming] subunit beta, mitochondrial OS=Homo sapiens GN=SUCLA2 PE=1 SV=3	16	0.498798	1.05953	19.2803	19.123	19.2887	19.6171	19.2965	19.2684	19.2748	19.4655
	LARP1_HUMAN	La-related protein 1 OS=Homo sapiens GN=LARP1 PE=1 SV=2	7	0.499886	0.817372	16.8811	15.7435	15.6782	15.222	14.8959	15.6003	16.3982	16.1238
	UTP18_HUMAN	U3 small nucleolar RNA-associated protein 18 homolog OS=Homo sapiens GN=UTP18 PE=1 SV=3	4	0.500128	1.18752	15.2428	15.6385	15.0772	15.4184	15.2461	14.5982	15.5696	16.4724
	PUR9_HUMAN	Bifunctional purine biosynthesis protein PURH OS=Homo sapiens GN=ATIC PE=1 SV=3	4	0.500662	1.82214	14.4633	12.9769	13.0401	12.3798	13.1473	16.0952	13.2614	15.9227
	PYGL_HUMAN	Glycogen phosphorylase, liver form OS=Homo sapiens GN=PYGL PE=1 SV=4	3	0.500843	1.34631	13.982	15.4408	15.1576	14.1542	14.6705	14.7541	14.1393	15.3164
	TACC1_HUMAN	Transforming acidic coiled-coil-containing protein 1 OS=Homo sapiens GN=TACC1 PE=1 SV=2	8	0.501133	1.20161	17.315	17.3731	16.8946	16.2726	16.3904	17.101	16.8795	17.7927
	RAD50_HUMAN	DNA repair protein RAD50 OS=Homo sapiens GN=RAD50 PE=1 SV=1	10	0.501377	0.8904	15.867	15.1517	16.3899	16.2568	15.7595	16.119	16.5863	16.4053
	SCD5_HUMAN	Stearoyl-CoA desaturase 5 OS=Homo sapiens GN=SCD5 PE=1 SV=2	7	0.501484	0.869669	18.5823	17.8434	17.4431	17.9253	18.412	17.9478	18.1068	18.0218
	F10A1_HUMAN	Hsc70-interacting protein OS=Homo sapiens GN=ST13 PE=1 SV=2;sp	4	0.501737	0.775094	16.6259	17.6223	17.86	16.6507	17.1311	16.7148	17.5638	16.7227
	SYF1_HUMAN	Pre-mRNA-splicing factor SYF1 OS=Homo sapiens GN=XAB2 PE=1 SV=2	9	0.501738	1.04391	17.2157	17.0739	16.8532	16.957	17.2153	17.2508	17.0616	17.3121
	TBB2B_HUMAN	Tubulin beta-2B chain OS=Homo sapiens GN=TUBB2B PE=1 SV=1	1	0.502764	0.937794	19.9429	20.1966	20.3185	20.1743	19.6775	19.5165	20.2497	19.9306
	ZFR_HUMAN	Zinc finger RNA-binding protein OS=Homo sapiens GN=ZFR PE=1 SV=2	15	0.502805	1.11258	18.5613	18.3408	18.0141	18.7405	18.3506	18.4566	18.5842	18.5879
	EMC4_HUMAN	ER membrane protein complex subunit 4 OS=Homo sapiens GN=EMC4 PE=1 SV=2	3	0.503261	1.08255	16.3654	16.2993	16.0487	15.9348	16.4066	16.4966	16.027	16.5747
	ACTB_HUMAN	Actin, cytoplasmic 1 OS=Homo sapiens GN=ACTB PE=1 SV=1	1	0.503729	1.16424	20.7297	20.2006	20.4297	20.5532	20.2453	21.087	20.7666	21.2081
	MEP50_HUMAN	Methylosome protein 50 OS=Homo sapiens GN=WDR77 PE=1 SV=1	3	0.505399	0.622317	14.0357	13.7023	15.384	12.075	14.2256	14.3081	13.4822	14.3049
	MK01_HUMAN	Mitogen-activated protein kinase 1 OS=Homo sapiens GN=MAPK1 PE=1 SV=3	6	0.506538	0.713998	15.6068	14.8208	14.6724	12.6501	15.2043	14.9758	14.8449	15.9376
	GSTM2_HUMAN	Glutathione S-transferase Mu 2 OS=Homo sapiens GN=GSTM2 PE=1 SV=2	2	0.506656	0.662077	12.4388	13.7368	15.2808	13.6786	14.2188	12.0586	13.6314	13.7161
	ODPA_HUMAN	Pyruvate dehydrogenase E1 component subunit alpha, somatic form, mitochondrial OS=Homo sapiens GN=PDHA1 PE=1 SV=3	19	0.506882	0.938656	19.5277	19.5448	19.6118	19.1618	19.3123	19.2939	19.3096	19.3957
	RBM15_HUMAN	Putative RNA-binding protein 15 OS=Homo sapiens GN=RBM15 PE=1 SV=2	7	0.506914	1.26417	15.5631	14.986	14.3195	15.8949	15.0874	15.3335	15.4841	15.5925
	BAIP2_HUMAN	Brain-specific angiogenesis inhibitor 1-associated protein 2 OS=Homo sapiens GN=BAIAP2 PE=1 SV=1	6	0.507406	0.836295	16.4234	16.4063	16.2298	15.0708	16.5658	16.2324	16.1614	16.6392
	DTNA_HUMAN	Dystrobrevin alpha OS=Homo sapiens GN=DTNA PE=1 SV=2	3	0.507694	0.688077	13.5206	13.0151	12.7374	13.1242	15.4677	12.8854	14.2274	14.771
	GBG5_HUMAN	Guanine nucleotide-binding protein G(I)/G(S)/G(O) subunit gamma-5 OS=Homo sapiens GN=GNG5 PE=1 SV=3	3	0.508262	0.553634	12.8475	12.9804	15.2116	16.9917	15.7116	13.7949	16.1745	12.7662
	RL15_HUMAN	60S ribosomal protein L15 OS=Homo sapiens GN=RPL15 PE=1 SV=2	12	0.509236	0.930652	20.1708	20.2614	20.2288	20.3509	20.5562	20.0778	20.4314	20.2823
	MRRP1_HUMAN	Mitochondrial ribonuclease P protein 1 OS=Homo sapiens GN=TRMT10C PE=1 SV=2	16	0.509334	1.06971	18.8778	18.9526	18.5242	18.7683	18.9051	18.6456	18.4757	18.8052
	HMGN2_HUMAN	Non-histone chromosomal protein HMG-17 OS=Homo sapiens GN=HMGN2 PE=1 SV=3	8	0.509409	1.17016	20.9854	20.6958	20.0714	21.1771	20.6946	20.7633	20.9463	20.9683
	UFD1_HUMAN	Ubiquitin fusion degradation protein 1 homolog OS=Homo sapiens GN=UFD1L PE=1 SV=3	4	0.509434	0.836974	16.2484	16.7303	17.3544	16.4017	16.7248	16.0063	16.5005	16.6629
	PININ_HUMAN	Pinin OS=Homo sapiens GN=PNN PE=1 SV=4	15	0.510169	1.05088	19.0256	18.9459	18.6673	18.7259	18.8571	18.8182	18.7756	19.1219
	PRDX2_HUMAN	Peroxiredoxin-2 OS=Homo sapiens GN=PRDX2 PE=1 SV=5	6	0.510184	1.11211	16.5773	17.0292	16.3903	16.4513	16.1643	16.6554	16.3649	15.9742
	SEC62_HUMAN	Translocation protein SEC62 OS=Homo sapiens GN=SEC62 PE=1 SV=1	4	0.510599	1.24997	16.4004	15.7616	14.9136	16.3507	15.9759	16.0405	16.0454	16.4702
	NDUBB_HUMAN	NADH dehydrogenase [ubiquinone] 1 beta subcomplex subunit 11, mitochondrial OS=Homo sapiens GN=NDUFB11 PE=1 SV=1	2	0.511025	0.891607	16.4738	15.9469	15.6498	15.1437	15.9968	15.9571	16.6365	17.0472
	EXOC2_HUMAN	Exocyst complex component 2 OS=Homo sapiens GN=EXOC2 PE=1 SV=1	2	0.512773	0.433613	12.9893	16.3734	16.8984	12.6107	16.1881	14.4704	15.4501	13.2491
	EF1B_HUMAN	Elongation factor 1-beta OS=Homo sapiens GN=EEF1B2 PE=1 SV=3	5	0.514831	0.735566	17.9576	18.6296	17.9635	17.6893	18.0455	18.0206	17.5406	15.3954
	SSRD_HUMAN	Translocon-associated protein subunit delta OS=Homo sapiens GN=SSR4 PE=1 SV=1	6	0.515432	0.949758	19.8795	19.9018	20.2215	20.2969	20.1441	19.7724	20.0482	20.0247
	TRIM4_HUMAN	E3 ubiquitin-protein ligase TRIM4 OS=Homo sapiens GN=TRIM4 PE=1 SV=2	2	0.516811	0.840719	13.1704	13.0897	13.1966	12.0317	13.3146	13.0778	13.1947	13.6758
	PSB4_HUMAN	Proteasome subunit beta type-4 OS=Homo sapiens GN=PSMB4 PE=1 SV=4	6	0.517193	1.29062	16.9216	16.9286	17.158	17.0382	16.5389	18.4051	16.8735	16.5924
	SDPR_HUMAN	Serum deprivation-response protein OS=Homo sapiens GN=SDPR PE=1 SV=3	7	0.517338	1.21431	16.896	16.5315	16.2169	17.6032	17.0467	17.178	17.3902	17.3578
	SOAT1_HUMAN	Sterol O-acyltransferase 1 OS=Homo sapiens GN=SOAT1 PE=1 SV=3	5	0.519891	0.928974	17.8308	17.6388	17.3807	17.4521	18.1291	17.6501	18.045	18.2194
	ATPD_HUMAN	ATP synthase subunit delta, mitochondrial OS=Homo sapiens GN=ATP5D PE=1 SV=2	4	0.520118	1.21553	18.643	19.0385	18.025	18.8598	18.4918	19.234	18.4667	17.6205
	CD166_HUMAN	CD166 antigen OS=Homo sapiens GN=ALCAM PE=1 SV=2	26	0.520519	0.912334	20.2654	19.9218	20.1478	20.5557	20.3351	19.9727	20.5667	20.3354
	COX2_HUMAN	Cytochrome c oxidase subunit 2 OS=Homo sapiens GN=MT-CO2 PE=1 SV=1	5	0.520555	1.16117	18.8228	19.3781	19.5892	19.0288	18.9627	19.0453	18.4729	19.2577
	WDR61_HUMAN	WD repeat-containing protein 61 OS=Homo sapiens GN=WDR61 PE=1 SV=1	4	0.520739	1.1618	16.7794	16.854	16.9681	16.7844	16.2607	17.3566	16.9603	16.8389
	SRGP1_HUMAN	SLIT-ROBO Rho GTPase-activating protein 1 OS=Homo sapiens GN=SRGAP1 PE=1 SV=1;sp	2	0.520963	1.73968	15.8866	15.892	15.9616	14.2068	14.982	16.4999	12.3956	15.8225
	DNLI3_HUMAN	DNA ligase 3 OS=Homo sapiens GN=LIG3 PE=1 SV=2	3	0.521411	1.92383	13.3226	12.9658	13.923	11.8608	12.6595	16.2014	12.0521	14.7052
	PSB9_HUMAN	Proteasome subunit beta type-9 OS=Homo sapiens GN=PSMB9 PE=1 SV=2	2	0.522868	1.83734	12.0576	14.6024	13.8633	11.8813	12.4881	15.7081	13.7396	13.4674
	PPIG_HUMAN	Peptidyl-prolyl cis-trans isomerase G OS=Homo sapiens GN=PPIG PE=1 SV=2	4	0.523139	1.14427	16.5918	16.6986	16.1358	17.1172	16.448	16.3218	16.7071	16.5228
	RM15_HUMAN	39S ribosomal protein L15, mitochondrial OS=Homo sapiens GN=MRPL15 PE=1 SV=1	9	0.523192	0.922019	17.1926	17.3682	17.525	17.6333	17.7337	17.2055	17.6985	17.4742
	RLA2_HUMAN	60S acidic ribosomal protein P2 OS=Homo sapiens GN=RPLP2 PE=1 SV=1	5	0.523573	1.10731	18.9448	19.06	19.0087	19.5412	19.0335	19.3836	19.9739	19.5643
	IKIP_HUMAN	Inhibitor of nuclear factor kappa-B kinase-interacting protein OS=Homo sapiens GN=IKBIP PE=1 SV=1	7	0.523908	1.07237	17.7951	17.5283	17.3105	17.6833	17.0897	17.3433	17.4467	17.4904
	SYCM_HUMAN	Probable cysteine--tRNA ligase, mitochondrial OS=Homo sapiens GN=CARS2 PE=1 SV=1	6	0.524793	0.937862	17.0398	16.6986	16.8154	16.9118	16.6769	16.3903	16.5831	16.7443
	MPP5_HUMAN	MAGUK p55 subfamily member 5 OS=Homo sapiens GN=MPP5 PE=1 SV=3	2	0.525076	1.28531	13.8832	13.0183	12.7833	12.8922	13.6775	14.3357	12.191	13.7372
	QCR7_HUMAN	Cytochrome b-c1 complex subunit 7 OS=Homo sapiens GN=UQCRB PE=1 SV=2	3	0.525931	0.614514	15.9823	15.4266	16.1219	16.0391	14.6145	15.8598	15.8343	12.4177
	THOC2_HUMAN	THO complex subunit 2 OS=Homo sapiens GN=THOC2 PE=1 SV=2	6	0.526349	0.95973	16.3753	16.2997	16.201	16.1799	16.3405	16.0694	16.4637	16.5942
	CP20A_HUMAN	Cytochrome P450 20A1 OS=Homo sapiens GN=CYP20A1 PE=1 SV=1	3	0.527836	1.10457	16.1679	15.7166	16.4875	16.8636	16.6304	17.0384	16.5936	16.8347
	CROCC_HUMAN	Rootletin OS=Homo sapiens GN=CROCC PE=1 SV=1	2	0.528187	1.61174	13.6349	12.268	12.2813	11.9913	11.0646	12.416	11.7211	14.7811
	ACADM_HUMAN	Medium-chain specific acyl-CoA dehydrogenase, mitochondrial OS=Homo sapiens GN=ACADM PE=1 SV=1	12	0.528338	0.918672	19.1491	19.2317	19.589	19.8416	19.3369	18.9731	19.3709	18.9101
	LA_HUMAN	Lupus La protein OS=Homo sapiens GN=SSB PE=1 SV=2	9	0.529744	1.12725	17.0138	17.4674	16.8738	16.3464	16.6237	16.8374	16.4757	17.027
	ROA2_HUMAN	Heterogeneous nuclear ribonucleoproteins A2/B1 OS=Homo sapiens GN=HNRNPA2B1 PE=1 SV=2	31	0.530319	0.954524	23.1072	22.789	22.9723	22.8926	22.7112	22.7046	22.6722	22.8082
	GPX1_HUMAN	Glutathione peroxidase 1 OS=Homo sapiens GN=GPX1 PE=1 SV=4	4	0.530977	0.765345	16.4167	16.7291	17.1365	17.5642	16.633	16.2945	17.1899	15.2451
	HTRA2_HUMAN	Serine protease HTRA2, mitochondrial OS=Homo sapiens GN=HTRA2 PE=1 SV=2	3	0.531336	2.47725	12.9119	15.5965	15.1752	11.6506	11.034	16.3144	15.5299	16.3245
	UBQL1_HUMAN	Ubiquilin-1 OS=Homo sapiens GN=UBQLN1 PE=1 SV=2	5	0.53225	0.775326	17.1458	17.2308	17.3012	15.4188	16.4069	16.2554	16.9172	17.3975
	RAB8A_HUMAN	Ras-related protein Rab-8A OS=Homo sapiens GN=RAB8A PE=1 SV=1	6	0.532801	1.06833	17.7791	17.7807	17.6733	18.1729	18.0477	17.9728	18.0639	18.0189
	MFF_HUMAN	Mitochondrial fission factor OS=Homo sapiens GN=MFF PE=1 SV=1	3	0.532861	1.06216	14.7631	14.6934	15.1544	15.0915	15.0807	15.1089	14.488	14.9403
	TBA1C_HUMAN	Tubulin alpha-1C chain OS=Homo sapiens GN=TUBA1C PE=1 SV=1	3	0.534662	1.05066	17.5191	17.6289	18.2065	18.0127	17.5455	17.8468	18.1393	18.2071
	TACO1_HUMAN	Translational activator of cytochrome c oxidase 1 OS=Homo sapiens GN=TACO1 PE=1 SV=1	3	0.534876	0.900785	16.9001	16.9973	17.1934	17.5101	17.1408	16.5271	17.2199	16.8167
	SYDM_HUMAN	Aspartate--tRNA ligase, mitochondrial OS=Homo sapiens GN=DARS2 PE=1 SV=1	15	0.535144	0.97074	18.9489	19.0596	19.0116	18.885	18.889	18.7334	18.7452	18.7453
	FAH2A_HUMAN	Fumarylacetoacetate hydrolase domain-containing protein 2A OS=Homo sapiens GN=FAHD2A PE=1 SV=1;sp	5	0.535488	0.930309	15.8892	15.4566	16.4228	16.7116	16.0673	15.8901	16.4135	16.3176
	PIMT_HUMAN	Protein-L-isoaspartate(D-aspartate) O-methyltransferase OS=Homo sapiens GN=PCMT1 PE=1 SV=4	2	0.535821	1.3682	12.7466	14.1447	14.377	16.1115	13.6357	13.0926	15.0502	14.2698
	SMCA2_HUMAN	Probable global transcription activator SNF2L2 OS=Homo sapiens GN=SMARCA2 PE=1 SV=2	4	0.536277	0.936891	15.6797	15.7494	15.2551	15.4152	15.7533	15.3087	15.8755	15.7141
	LSAMP_HUMAN	Limbic system-associated membrane protein OS=Homo sapiens GN=LSAMP PE=1 SV=2	5	0.536445	0.764615	17.6297	16.9294	17.1034	15.3066	16.4682	16.6744	16.002	16.7441
	RPRD2_HUMAN	Regulation of nuclear pre-mRNA domain-containing protein 2 OS=Homo sapiens GN=RPRD2 PE=1 SV=1	2	0.536587	0.716447	12.8205	13.1373	14.9183	12.5151	12.2109	12.9133	14.3221	13.7817
	RINT1_HUMAN	RAD50-interacting protein 1 OS=Homo sapiens GN=RINT1 PE=1 SV=1	3	0.537441	0.706497	13.8384	14.656	14.5552	13.3446	14.3277	12.1385	14.3684	14.9457
	1433G_HUMAN	14-3-3 protein gamma OS=Homo sapiens GN=YWHAG PE=1 SV=2	9	0.537798	1.11815	18.0163	17.9485	16.8243	16.9115	17.2374	18.0714	18.0393	17.8304
	TOM22_HUMAN	Mitochondrial import receptor subunit TOM22 homolog OS=Homo sapiens GN=TOMM22 PE=1 SV=3	6	0.538163	1.06237	20.4471	20.6553	20.4393	20.1953	20.4977	20.5419	20.4614	20.8022
	TOX4_HUMAN	TOX high mobility group box family member 4 OS=Homo sapiens GN=TOX4 PE=1 SV=1;sp	2	0.538178	0.925242	15.0139	15.2518	15.6542	15.3582	14.976	14.5126	14.4103	14.4834
	MARCS_HUMAN	Myristoylated alanine-rich C-kinase substrate OS=Homo sapiens GN=MARCKS PE=1 SV=4	12	0.53924	1.10793	20.5033	20.0272	19.9113	20.125	19.9887	20.4148	20.237	20.6647
	STX12_HUMAN	Syntaxin-12 OS=Homo sapiens GN=STX12 PE=1 SV=1	9	0.540423	1.04497	17.7538	17.6463	17.7575	18.0804	17.8682	17.8605	17.9396	17.9858
	TRA2B_HUMAN	Transformer-2 protein homolog beta OS=Homo sapiens GN=TRA2B PE=1 SV=1	10	0.540848	1.0811	19.9333	20.0379	20.0316	20.6022	20.0838	20.0402	20.0825	19.9009
	RM16_HUMAN	39S ribosomal protein L16, mitochondrial OS=Homo sapiens GN=MRPL16 PE=1 SV=1	5	0.54244	0.868427	16.6817	16.6928	16.6981	16.7325	16.9752	15.892	16.4413	16.6648
	ASNA_HUMAN	ATPase ASNA1 OS=Homo sapiens GN=ASNA1 PE=1 SV=2	6	0.542919	1.1692	16.5597	17.207	17.347	16.6668	16.8066	17.5808	17.0037	17.1646
	XRN2_HUMAN	5-3 exoribonuclease 2 OS=Homo sapiens GN=XRN2 PE=1 SV=1	20	0.543073	0.952549	18.8126	18.7072	18.6329	18.5838	18.8456	18.5332	18.374	18.5604
	GANAB_HUMAN	Neutral alpha-glucosidase AB OS=Homo sapiens GN=GANAB PE=1 SV=3	51	0.543127	1.03787	22.5094	22.576	22.7142	22.8479	22.6855	22.5153	22.4952	22.6796
	NICA_HUMAN	Nicastrin OS=Homo sapiens GN=NCSTN PE=1 SV=2	5	0.543253	0.780738	16.6092	16.6264	17.5093	16.2731	15.632	16.584	17.0596	15.8982
	ITA5_HUMAN	Integrin alpha-5 OS=Homo sapiens GN=ITGA5 PE=1 SV=2	2	0.543489	1.25402	12.4467	11.7947	14.1708	14.09	12.4456	14.0385	13.7941	14.2402
	AGAL_HUMAN	Alpha-galactosidase A OS=Homo sapiens GN=GLA PE=1 SV=1	3	0.544187	0.813789	16.2454	16.0025	16.2644	14.7464	15.5855	16.1025	15.7715	15.8263
	HEMH_HUMAN	Ferrochelatase, mitochondrial OS=Homo sapiens GN=FECH PE=1 SV=2	3	0.545574	1.4054	13.1705	15.7801	15.9269	15.648	16.2475	15.6935	15.8791	16.0663
	STAG1_HUMAN	Cohesin subunit SA-1 OS=Homo sapiens GN=STAG1 PE=1 SV=3	3	0.546048	1.35086	11.652	13.6477	15.0515	13.9435	15.2996	15.5126	15.2542	15.889
	SURF4_HUMAN	Surfeit locus protein 4 OS=Homo sapiens GN=SURF4 PE=1 SV=3	5	0.547209	1.09807	20.8914	20.6052	20.2666	20.1817	20.8114	21.1145	19.7447	20.3526
	CPSF2_HUMAN	Cleavage and polyadenylation specificity factor subunit 2 OS=Homo sapiens GN=CPSF2 PE=1 SV=2	6	0.547226	1.19965	16.542	16.8645	16.8996	16.4024	16.19	16.1016	15.9386	17.2521
	QCR2_HUMAN	Cytochrome b-c1 complex subunit 2, mitochondrial OS=Homo sapiens GN=UQCRC2 PE=1 SV=3	16	0.547226	1.03761	20.5142	20.7053	21.0056	20.9402	20.7003	20.6006	20.7507	20.9378
	TCOF_HUMAN	Treacle protein OS=Homo sapiens GN=TCOF1 PE=1 SV=3	15	0.547679	1.09344	18.0611	17.9435	17.6281	18.3133	18.0367	17.9148	18.0626	18.1324
	ENAH_HUMAN	Protein enabled homolog OS=Homo sapiens GN=ENAH PE=1 SV=2	3	0.547786	1.244	14.1124	13.8923	13.8329	15.4704	14.3418	14.6266	15.13	14.6879
	SRSF4_HUMAN	Serine/arginine-rich splicing factor 4 OS=Homo sapiens GN=SRSF4 PE=1 SV=2	9	0.54825	1.03672	19.242	19.1229	18.9665	19.2105	18.8535	18.8448	19.0102	19.1021
	TOP2A_HUMAN	DNA topoisomerase 2-alpha OS=Homo sapiens GN=TOP2A PE=1 SV=3	52	0.548959	0.923027	21.8271	21.4462	20.9136	21.1587	21.6805	21.2449	21.2382	21.3473
	PRP8_HUMAN	Pre-mRNA-processing-splicing factor 8 OS=Homo sapiens GN=PRPF8 PE=1 SV=2	81	0.549099	0.947674	21.6073	21.651	21.421	21.1597	21.6444	21.3648	21.3497	21.5367
	SMHD1_HUMAN	Structural maintenance of chromosomes flexible hinge domain-containing protein 1 OS=Homo sapiens GN=SMCHD1 PE=1 SV=2	8	0.549117	1.14947	16.9799	16.9778	17.2886	16.7656	16.5498	17.4077	16.6075	17.0786
	CAND1_HUMAN	Cullin-associated NEDD8-dissociated protein 1 OS=Homo sapiens GN=CAND1 PE=1 SV=2	15	0.549772	1.17815	17.2252	17.8442	18.1138	17.356	17.2264	18.0561	17.6315	17.8867
	MACF1_HUMAN	Microtubule-actin cross-linking factor 1, isoforms 1/2/3/5 OS=Homo sapiens GN=MACF1 PE=1 SV=4	35	0.549859	0.958687	18.6762	18.6384	18.4838	18.5632	18.7794	18.4566	18.7851	18.8229
	LMNB2_HUMAN	Lamin-B2 OS=Homo sapiens GN=LMNB2 PE=1 SV=4	44	0.550212	1.08994	21.3192	21.2998	21.1013	21.7781	21.0998	21.0496	21.0548	20.9446
	EMC8_HUMAN	ER membrane protein complex subunit 8 OS=Homo sapiens GN=EMC8 PE=1 SV=1	2	0.550292	1.13498	15.3331	15.1971	14.3656	15.284	15.0346	15.2913	15.641	15.3325
	RT25_HUMAN	28S ribosomal protein S25, mitochondrial OS=Homo sapiens GN=MRPS25 PE=1 SV=1	7	0.55054	0.887631	17.024	16.3064	17.2066	16.8596	16.4411	16.9467	16.6314	16.5025
	GPAT3_HUMAN	Glycerol-3-phosphate acyltransferase 3 OS=Homo sapiens GN=GPAT3 PE=1 SV=2	13	0.550999	1.06655	18.0752	18.4596	18.3141	18.4357	18.5674	18.2833	18.2958	18.4458
	AHNK_HUMAN	Neuroblast differentiation-associated protein AHNAK OS=Homo sapiens GN=AHNAK PE=1 SV=2	164	0.551031	1.06222	22.3252	22.4302	22.2577	22.7037	22.4708	22.3323	22.5724	22.5083
	CIRBP_HUMAN	Cold-inducible RNA-binding protein OS=Homo sapiens GN=CIRBP PE=1 SV=1	5	0.55113	0.968526	18.1254	18.12	18.1234	18.2538	18.2836	18.112	18.4266	18.2886
	STX7_HUMAN	Syntaxin-7 OS=Homo sapiens GN=STX7 PE=1 SV=4	4	0.551196	1.1069	16.7909	16.3181	16.0765	16.628	16.5297	16.8312	16.5412	16.7471
	RAB5A_HUMAN	Ras-related protein Rab-5A OS=Homo sapiens GN=RAB5A PE=1 SV=2	6	0.552333	1.07493	18.2031	18.3995	18.4675	18.7726	18.6102	18.2508	18.6027	18.8777
	SPF27_HUMAN	Pre-mRNA-splicing factor SPF27 OS=Homo sapiens GN=BCAS2 PE=1 SV=1	3	0.55271	0.930375	16.8652	17.1435	17.16	16.8266	16.586	16.6081	16.958	16.5745
	PSA4_HUMAN	Proteasome subunit alpha type-4 OS=Homo sapiens GN=PSMA4 PE=1 SV=1	3	0.552964	1.27903	14.1848	15.9874	16.4007	15.8688	15.6536	16.1583	16.0029	15.6478
	TRRAP_HUMAN	Transformation/transcription domain-associated protein OS=Homo sapiens GN=TRRAP PE=1 SV=3	6	0.553258	0.883497	15.5465	15.6609	15.9944	15.1825	15.6791	15.2704	15.3849	15.7764
	ACOT9_HUMAN	Acyl-coenzyme A thioesterase 9, mitochondrial OS=Homo sapiens GN=ACOT9 PE=1 SV=2	26	0.553504	0.94387	20.6146	20.8749	21.0263	20.8563	20.8018	20.4679	20.6542	20.5645
	MAP1A_HUMAN	Microtubule-associated protein 1A OS=Homo sapiens GN=MAP1A PE=1 SV=6	1	0.553582	0.810202	13.6659	13.7179	14.1106	13.6601	13.9356	12.4478	13.6773	14.3491
	SUMF2_HUMAN	Sulfatase-modifying factor 2 OS=Homo sapiens GN=SUMF2 PE=1 SV=2	5	0.553586	0.956461	18.1485	18.2456	18.7461	18.7254	18.5449	18.2008	17.9042	17.9151
	RL18_HUMAN	60S ribosomal protein L18 OS=Homo sapiens GN=RPL18 PE=1 SV=2	7	0.554115	0.860512	19.6787	18.8998	19.3249	19.9336	19.5642	18.865	19.767	19.7695
	LIPA1_HUMAN	Liprin-alpha-1 OS=Homo sapiens GN=PPFIA1 PE=1 SV=1	2	0.554147	1.26913	12.7728	14.2859	14.551	13.7204	14.0387	14.8703	14.4957	14.3571
	CRNL1_HUMAN	Crooked neck-like protein 1 OS=Homo sapiens GN=CRNKL1 PE=1 SV=4	3	0.554857	1.08253	15.6769	15.8736	15.6149	15.2499	15.8204	15.9882	15.3428	15.8009
	RT09_HUMAN	28S ribosomal protein S9, mitochondrial OS=Homo sapiens GN=MRPS9 PE=1 SV=2	10	0.555706	1.13112	18.2673	18.8406	18.3974	17.9104	18.604	18.5755	18.2866	18.9399
	P3H1_HUMAN	Prolyl 3-hydroxylase 1 OS=Homo sapiens GN=P3H1 PE=1 SV=2	20	0.557554	0.915362	19.642	19.0494	19.3524	19.662	19.2205	19.2543	19.6577	19.3966
	6PGD_HUMAN	6-phosphogluconate dehydrogenase, decarboxylating OS=Homo sapiens GN=PGD PE=1 SV=3	13	0.557781	1.20684	18.9381	18.9357	18.7412	18.0353	17.6728	18.9087	18.8863	19.4436
	H2AV_HUMAN	Histone H2A.V OS=Homo sapiens GN=H2AFV PE=1 SV=3;sp	4	0.557901	1.15498	21.0094	20.9433	20.3891	21.3488	21.4297	20.9266	20.0117	20.4525
	PELP1_HUMAN	Proline-, glutamic acid- and leucine-rich protein 1 OS=Homo sapiens GN=PELP1 PE=1 SV=2	8	0.557927	0.979471	17.1102	17.1685	17.5687	17.6077	17.2027	17.0943	17.5382	17.4296
	RL10A_HUMAN	60S ribosomal protein L10a OS=Homo sapiens GN=RPL10A PE=1 SV=2	12	0.558264	1.12118	19.4054	19.5426	18.9098	19.7207	19.6695	19.2527	19.3548	19.4837
	LDHA_HUMAN	L-lactate dehydrogenase A chain OS=Homo sapiens GN=LDHA PE=1 SV=2	20	0.558516	0.934936	20.5971	20.7114	20.7522	20.2182	20.4307	20.4192	20.6727	20.7158
	1C15_HUMAN	HLA class I histocompatibility antigen, Cw-15 alpha chain OS=Homo sapiens GN=HLA-C PE=1 SV=1;sp	0	0.559231	0.734397	15.4997	15.6655	15.4524	15.5665	15.5424	15.9569	15.2818	12.806
	PLBL2_HUMAN	Putative phospholipase B-like 2 OS=Homo sapiens GN=PLBD2 PE=1 SV=2	2	0.559488	0.821706	12.6919	13.2298	13.6388	12.3281	12.3181	12.6366	16.0454	15.3666
	MPU1_HUMAN	Mannose-P-dolichol utilization defect 1 protein OS=Homo sapiens GN=MPDU1 PE=1 SV=2	2	0.560233	1.08169	18.0272	18.3571	17.9803	17.8924	18.2848	18.0206	18.0044	18.4797
	CPT2_HUMAN	Carnitine O-palmitoyltransferase 2, mitochondrial OS=Homo sapiens GN=CPT2 PE=1 SV=2	18	0.561122	0.936275	18.3919	17.9273	18.2994	18.3046	17.8849	18.1146	18.3432	18.1931
	METK2_HUMAN	S-adenosylmethionine synthase isoform type-2 OS=Homo sapiens GN=MAT2A PE=1 SV=1	2	0.56116	0.798473	12.6625	12.1259	14.4623	13.263	14.2117	13.5415	13.2739	14.3813
	ECHP_HUMAN	Peroxisomal bifunctional enzyme OS=Homo sapiens GN=EHHADH PE=1 SV=3	6	0.561286	1.72603	13.2272	16.0524	14.627	11.909	14.0078	15.6374	14.2059	15.6188
	GNPAT_HUMAN	Dihydroxyacetone phosphate acyltransferase OS=Homo sapiens GN=GNPAT PE=1 SV=1	4	0.561551	0.467037	12.3193	14.9399	15.9518	11.3131	16.3098	13.1476	14.5836	15.3703
	STRAP_HUMAN	Serine-threonine kinase receptor-associated protein OS=Homo sapiens GN=STRAP PE=1 SV=1	7	0.561966	0.92408	16.7563	17.1669	17.7391	17.4242	17.4273	17.1354	17.6044	17.345
	GPDM_HUMAN	Glycerol-3-phosphate dehydrogenase, mitochondrial OS=Homo sapiens GN=GPD2 PE=1 SV=3	45	0.562201	1.06149	21.8552	21.9484	21.885	21.804	21.8619	21.7364	21.3595	21.8171
	COPE_HUMAN	Coatomer subunit epsilon OS=Homo sapiens GN=COPE PE=1 SV=3	5	0.562999	1.14562	15.9015	16.8315	16.1839	15.799	16.194	15.9892	15.8847	16.3289
	XRCC6_HUMAN	X-ray repair cross-complementing protein 6 OS=Homo sapiens GN=XRCC6 PE=1 SV=2	28	0.563643	0.96534	20.5528	20.2836	20.1038	20.0431	20.1908	20.2692	20.2603	20.3081
	AP1B1_HUMAN	AP-1 complex subunit beta-1 OS=Homo sapiens GN=AP1B1 PE=1 SV=2	5	0.564864	1.26394	16.6412	16.3003	16.9831	16.7192	17.162	17.2317	15.0417	16.9284
	COX20_HUMAN	Cytochrome c oxidase protein 20 homolog OS=Homo sapiens GN=COX20 PE=1 SV=2	2	0.565533	1.29396	15.7944	15.63	15.2516	15.5679	15.8296	15.1676	13.8194	15.8167
	SCAM3_HUMAN	Secretory carrier-associated membrane protein 3 OS=Homo sapiens GN=SCAMP3 PE=1 SV=3	8	0.56711	1.09934	18.6355	18.6115	18.2259	18.9089	18.7546	18.4277	18.7035	18.918
	GLRX3_HUMAN	Glutaredoxin-3 OS=Homo sapiens GN=GLRX3 PE=1 SV=2	2	0.567699	0.625445	13.6719	12.2479	14.0351	11.0787	12.1438	14.2242	14.1038	13.6957
	CTNA1_HUMAN	Catenin alpha-1 OS=Homo sapiens GN=CTNNA1 PE=1 SV=1	28	0.568081	1.08636	20.772	20.7297	20.4438	21.0907	20.9156	20.6971	20.7765	20.8685
	HUWE1_HUMAN	E3 ubiquitin-protein ligase HUWE1 OS=Homo sapiens GN=HUWE1 PE=1 SV=3	5	0.568126	0.890921	15.3829	14.4829	15.1575	15.395	14.6847	14.856	15.2728	15.0975
	VPP2_HUMAN	V-type proton ATPase 116 kDa subunit a isoform 2 OS=Homo sapiens GN=ATP6V0A2 PE=1 SV=2	6	0.568353	0.666106	15.6577	16.2114	15.9374	13.0708	16.0244	14.7933	15.2028	16.4019
	CARF_HUMAN	CDKN2A-interacting protein OS=Homo sapiens GN=CDKN2AIP PE=1 SV=3	6	0.569097	0.833403	15.5771	14.8619	14.9446	15.2838	14.8341	15.3513	15.789	14.5961
	SARM1_HUMAN	Sterile alpha and TIR motif-containing protein 1 OS=Homo sapiens GN=SARM1 PE=1 SV=1	4	0.569191	0.64319	13.9866	14.8508	15.5483	11.9864	14.1288	14.4782	15.3706	15.1722
	RM39_HUMAN	39S ribosomal protein L39, mitochondrial OS=Homo sapiens GN=MRPL39 PE=1 SV=3	4	0.569277	0.8518	16.056	16.1912	15.323	15.6614	16.014	15.8998	16.1515	14.8666
	CTND1_HUMAN	Catenin delta-1 OS=Homo sapiens GN=CTNND1 PE=1 SV=1	31	0.569335	0.978345	20.1007	20.0527	20.1933	20.2619	20.1746	20.0126	20.2861	20.3012
	UTP15_HUMAN	U3 small nucleolar RNA-associated protein 15 homolog OS=Homo sapiens GN=UTP15 PE=1 SV=3	8	0.569973	1.1943	16.6447	16.9731	16.4029	17.121	16.6023	15.701	16.5464	17.4258
	AT2B1_HUMAN	Plasma membrane calcium-transporting ATPase 1 OS=Homo sapiens GN=ATP2B1 PE=1 SV=3	7	0.569987	1.12603	15.835	16.4899	16.7118	16.2794	16.5208	17.1157	16.6237	16.4913
	RL31_HUMAN	60S ribosomal protein L31 OS=Homo sapiens GN=RPL31 PE=1 SV=1	4	0.570671	1.07595	18.3807	18.7997	17.8768	18.162	18.4986	18.5579	18.2486	17.9075
	EMAL4_HUMAN	Echinoderm microtubule-associated protein-like 4 OS=Homo sapiens GN=EML4 PE=1 SV=3	2	0.571035	0.867286	16.151	15.7604	18.3373	18.5141	18.0556	18.4795	18.1244	17.0927
	ADDA_HUMAN	Alpha-adducin OS=Homo sapiens GN=ADD1 PE=1 SV=2	9	0.571334	1.07385	17.2644	17.1065	17.5375	17.9489	17.2096	17.0133	17.4499	17.8039
	CAN2_HUMAN	Calpain-2 catalytic subunit OS=Homo sapiens GN=CAPN2 PE=1 SV=6	4	0.571508	1.2773	15.0472	16.9826	15.2083	15.2792	15.4892	15.5804	16.0825	15.3973
	2AAA_HUMAN	Serine/threonine-protein phosphatase 2A 65 kDa regulatory subunit A alpha isoform OS=Homo sapiens GN=PPP2R1A PE=1 SV=4	21	0.571824	1.03794	19.766	19.7134	20.0415	19.9185	19.6244	19.7756	19.6357	19.8751
	CLGN_HUMAN	Calmegin OS=Homo sapiens GN=CLGN PE=1 SV=1	15	0.57259	1.05996	18.3655	18.2432	18.018	18.3611	18.4545	18.287	18.3538	18.6366
	SODC_HUMAN	Superoxide dismutase [Cu-Zn] OS=Homo sapiens GN=SOD1 PE=1 SV=2	3	0.572672	1.38048	13.1613	15.5283	15.7508	15.9056	14.632	15.1777	15.376	14.1691
	THIL_HUMAN	Acetyl-CoA acetyltransferase, mitochondrial OS=Homo sapiens GN=ACAT1 PE=1 SV=1	21	0.572687	0.934168	19.9941	19.6953	20.1028	20.354	19.8142	19.8836	20.3192	19.9044
	NDKA_HUMAN	Nucleoside diphosphate kinase A OS=Homo sapiens GN=NME1 PE=1 SV=1	4	0.573321	0.780154	15.5223	16.8195	17.7499	16.4579	16.9441	16.2701	17.7597	16.9957
	ACSL3_HUMAN	Long-chain-fatty-acid--CoA ligase 3 OS=Homo sapiens GN=ACSL3 PE=1 SV=3	24	0.573519	1.04212	20.6472	20.6731	20.8721	21.1183	21.0437	20.8543	20.8888	21.0443
	CAV1_HUMAN	Caveolin-1 OS=Homo sapiens GN=CAV1 PE=1 SV=4	7	0.575043	0.939471	20.6635	20.3301	20.4056	20.5004	20.5173	20.1803	20.4241	20.6394
	NHP2_HUMAN	H/ACA ribonucleoprotein complex subunit 2 OS=Homo sapiens GN=NHP2 PE=1 SV=1	3	0.575302	1.08688	17.5102	18.051	17.5206	17.7508	17.6998	17.3185	17.8536	17.9447
	DAG1_HUMAN	Dystroglycan OS=Homo sapiens GN=DAG1 PE=1 SV=2	4	0.575875	1.17487	15.8632	16.8462	16.618	16.1026	16.6155	17.3636	16.8657	16.58
	HACD2_HUMAN	Very-long-chain (3R)-3-hydroxyacyl-CoA dehydratase 2 OS=Homo sapiens GN=HACD2 PE=1 SV=1	3	0.576101	0.85636	16.0733	16.4259	16.3844	15.8738	16.5329	15.4298	16.3138	16.68
	SAM50_HUMAN	Sorting and assembly machinery component 50 homolog OS=Homo sapiens GN=SAMM50 PE=1 SV=3	15	0.576222	0.88621	19.1452	19.3498	19.4181	18.4951	19.093	18.8207	18.8492	19.1428
	ERG1_HUMAN	Squalene monooxygenase OS=Homo sapiens GN=SQLE PE=1 SV=3	7	0.576423	1.18195	16.9194	16.2224	15.8607	16.4369	16.7281	16.7169	16.6561	17.7528
	SYHM_HUMAN	Probable histidine--tRNA ligase, mitochondrial OS=Homo sapiens GN=HARS2 PE=1 SV=1	9	0.577266	0.85244	17.7893	17.783	17.7192	16.6687	17.9008	17.361	17.1214	17.7967
	XPO1_HUMAN	Exportin-1 OS=Homo sapiens GN=XPO1 PE=1 SV=1	21	0.578425	0.905775	19.0385	19.3718	19.641	18.8806	19.1838	19.2001	19.2662	19.1059
	DOLK_HUMAN	Dolichol kinase OS=Homo sapiens GN=DOLK PE=1 SV=1	2	0.578452	1.43369	16.4177	16.8873	14.1583	12.4262	14.8873	15.9765	12.9057	15.158
	SCAM1_HUMAN	Secretory carrier-associated membrane protein 1 OS=Homo sapiens GN=SCAMP1 PE=1 SV=2	5	0.57917	0.939925	17.2624	17.233	17.4632	17.7056	17.4919	17.0348	17.626	17.5126
	KPYM_HUMAN	Pyruvate kinase PKM OS=Homo sapiens GN=PKM PE=1 SV=4	36	0.579872	1.0407	21.8285	21.6431	21.6484	21.756	21.2831	21.5459	21.5828	21.6281
	SODM_HUMAN	Superoxide dismutase [Mn], mitochondrial OS=Homo sapiens GN=SOD2 PE=1 SV=2	7	0.580374	0.892416	18.2342	18.7115	18.4765	18.5242	18.6257	18.1508	18.8113	18.1043
	CAB45_HUMAN	45 kDa calcium-binding protein OS=Homo sapiens GN=SDF4 PE=1 SV=1	9	0.580544	0.955178	17.2864	16.9513	17.3808	17.5345	17.4042	17.4515	17.5633	17.4329
	F213A_HUMAN	Redox-regulatory protein FAM213A OS=Homo sapiens GN=FAM213A PE=1 SV=3	6	0.580775	1.09976	17.8312	18.0224	17.7737	17.7586	17.9717	17.628	16.8753	17.5917
	RDH11_HUMAN	Retinol dehydrogenase 11 OS=Homo sapiens GN=RDH11 PE=1 SV=2	11	0.580997	1.03283	18.8338	18.9021	18.9493	19.0217	18.9462	18.787	18.9207	19.1256
	H14_HUMAN	Histone H1.4 OS=Homo sapiens GN=HIST1H1E PE=1 SV=2	3	0.581358	1.60644	17.3884	17.1115	17.9269	21.815	18.9392	19.2336	19.4298	18.2595
	MPP8_HUMAN	M-phase phosphoprotein 8 OS=Homo sapiens GN=MPHOSPH8 PE=1 SV=2	2	0.581909	1.56115	14.0189	12.2688	11.4503	13.7787	12.7916	15.2495	13.8383	13.3726
	SYNM_HUMAN	Probable asparagine--tRNA ligase, mitochondrial OS=Homo sapiens GN=NARS2 PE=1 SV=3	3	0.583113	1.5137	13.032	13.7312	14.7943	12.6337	14.3643	15.9272	11.9079	14.1986
	RB12B_HUMAN	RNA-binding protein 12B OS=Homo sapiens GN=RBM12B PE=1 SV=2	7	0.583737	0.903973	16.5464	15.9447	17.3298	16.8302	17.1545	17.509	16.9368	17.1009
	PGAM1_HUMAN	Phosphoglycerate mutase 1 OS=Homo sapiens GN=PGAM1 PE=1 SV=2;sp	8	0.584179	1.08432	16.8435	17.4976	17.4532	17.2978	16.6276	16.7533	17.1135	16.9563
	COPD_HUMAN	Coatomer subunit delta OS=Homo sapiens GN=ARCN1 PE=1 SV=1	4	0.584921	1.13799	15.8165	15.7886	16.1034	15.7269	15.4113	15.5089	15.1082	16.161
	SCFD2_HUMAN	Sec1 family domain-containing protein 2 OS=Homo sapiens GN=SCFD2 PE=1 SV=2	3	0.585284	1.08743	14.4425	14.9077	15.1825	14.7384	14.9028	15.063	14.8769	15.1794
	GBB2_HUMAN	Guanine nucleotide-binding protein G(I)/G(S)/G(T) subunit beta-2 OS=Homo sapiens GN=GNB2 PE=1 SV=3	5	0.585708	0.832783	17.6958	17.7087	17.7522	16.279	17.1047	17.6834	17.6565	17.4822
	SG196_HUMAN	Protein O-mannose kinase OS=Homo sapiens GN=POMK PE=1 SV=1	2	0.58591	0.833043	15.9256	16.2138	16.0981	14.6005	15.9763	15.7444	15.8252	16.2123
	APC7_HUMAN	Anaphase-promoting complex subunit 7 OS=Homo sapiens GN=ANAPC7 PE=1 SV=4	4	0.586449	0.709029	13.6027	12.0337	13.6736	13.8597	13.5778	15.0534	15.8591	13.7821
	P4K2A_HUMAN	Phosphatidylinositol 4-kinase type 2-alpha OS=Homo sapiens GN=PI4K2A PE=1 SV=1	5	0.586535	0.852543	14.6757	15.0958	15.8912	14.8583	15.1402	15.554	16.1474	15.4258
	RT02_HUMAN	28S ribosomal protein S2, mitochondrial OS=Homo sapiens GN=MRPS2 PE=1 SV=1	5	0.587197	0.783297	17.4642	17.419	17.6153	17.2742	17.6809	15.7711	16.545	17.4316
	DJC10_HUMAN	DnaJ homolog subfamily C member 10 OS=Homo sapiens GN=DNAJC10 PE=1 SV=2	4	0.588959	0.85847	13.7084	14.3373	16.4613	16.606	16.2436	15.48	16.1143	15.2237
	ZO1_HUMAN	Tight junction protein ZO-1 OS=Homo sapiens GN=TJP1 PE=1 SV=3	3	0.58897	0.840385	13.8533	13.8126	13.5355	14.3714	13.5988	12.6288	14.5314	13.7026
	IF1AX_HUMAN	Eukaryotic translation initiation factor 1A, X-chromosomal OS=Homo sapiens GN=EIF1AX PE=1 SV=2;sp	3	0.590189	0.922111	15.5538	15.7216	15.7878	16.0238	16.109	15.5222	16.3719	16.0869
	EHD1_HUMAN	EH domain-containing protein 1 OS=Homo sapiens GN=EHD1 PE=1 SV=2;sp	8	0.590935	1.1114	16.6188	16.8246	16.897	16.3163	16.3123	16.7632	16.2279	16.7614
	SRC8_HUMAN	Src substrate cortactin OS=Homo sapiens GN=CTTN PE=1 SV=2	5	0.5916	0.844712	15.5864	15.1136	16.0603	16.7599	15.6916	15.719	16.5311	15.303
	PDIA4_HUMAN	Protein disulfide-isomerase A4 OS=Homo sapiens GN=PDIA4 PE=1 SV=2	46	0.592018	1.05409	21.7715	21.552	21.4154	21.4636	21.5586	21.6328	21.6284	22.0295
	TPM3_HUMAN	Tropomyosin alpha-3 chain OS=Homo sapiens GN=TPM3 PE=1 SV=2	7	0.592195	1.077	17.9909	17.8195	17.5815	17.4565	17.2117	17.8222	17.7594	17.8732
	MRE11_HUMAN	Double-strand break repair protein MRE11A OS=Homo sapiens GN=MRE11A PE=1 SV=3	4	0.592438	1.30802	14.7399	15.2156	15.5951	14.3257	13.6511	15.5529	14.6919	15.1332
	TLN1_HUMAN	Talin-1 OS=Homo sapiens GN=TLN1 PE=1 SV=3	25	0.592727	0.968226	18.283	18.4697	18.775	18.634	18.44	18.3325	18.8376	18.7131
	VPS45_HUMAN	Vacuolar protein sorting-associated protein 45 OS=Homo sapiens GN=VPS45 PE=1 SV=1	6	0.592871	1.09931	16.2067	16.8746	16.7499	16.3448	16.5622	16.5403	16.4358	16.7412
	DHX9_HUMAN	ATP-dependent RNA helicase A OS=Homo sapiens GN=DHX9 PE=1 SV=4	56	0.593623	1.02638	22.881	22.8799	22.7112	22.8626	22.7814	22.6578	22.6608	22.7843
	STX18_HUMAN	Syntaxin-18 OS=Homo sapiens GN=STX18 PE=1 SV=1	5	0.593852	0.646356	13.189	15.0981	15.1396	12.2031	15.4437	13.7895	14.8409	15.004
	RT17_HUMAN	28S ribosomal protein S17, mitochondrial OS=Homo sapiens GN=MRPS17 PE=1 SV=1	3	0.594174	0.743359	15.3228	14.9899	16.0532	16.4147	15.097	15.8391	15.8906	13.4085
	ISOC2_HUMAN	Isochorismatase domain-containing protein 2 OS=Homo sapiens GN=ISOC2 PE=1 SV=1	7	0.594324	0.932151	17.7483	17.6334	18.6787	18.137	17.5897	17.8771	18.4181	18.3817
	THTR_HUMAN	Thiosulfate sulfurtransferase OS=Homo sapiens GN=TST PE=1 SV=4	4	0.594519	0.750206	16.4035	14.2873	16.4189	16.0988	16.8482	16.3266	16.0881	17.3875
	STRN_HUMAN	Striatin OS=Homo sapiens GN=STRN PE=1 SV=4	4	0.594537	1.38351	13.431	16.1909	14.1054	14.0525	15.2349	14.3832	14.8443	14.8623
	SPNS1_HUMAN	Protein spinster homolog 1 OS=Homo sapiens GN=SPNS1 PE=1 SV=1	2	0.594843	0.786778	13.6854	13.4311	14.2187	12.8721	13.2273	12.1825	13.5773	14.8392
	RBMX_HUMAN	RNA-binding motif protein, X chromosome OS=Homo sapiens GN=RBMX PE=1 SV=3	9	0.595355	1.08331	21.7513	21.6293	21.5515	22.2263	21.977	21.7996	21.884	21.9704
	EIF3I_HUMAN	Eukaryotic translation initiation factor 3 subunit I OS=Homo sapiens GN=EIF3I PE=1 SV=1	3	0.595871	0.701639	13.9318	13.4888	14.6647	11.6895	14.8906	15.4747	13.3611	14.1503
	PURB_HUMAN	Transcriptional activator protein Pur-beta OS=Homo sapiens GN=PURB PE=1 SV=3	3	0.595974	0.851658	14.9398	14.5918	14.6149	13.3403	13.643	13.8054	14.471	15.0047
	NIBAN_HUMAN	Protein Niban OS=Homo sapiens GN=FAM129A PE=1 SV=1	3	0.596002	0.595376	13.4755	14.7607	15.1394	15.2876	15.4671	11.0192	15.1417	15.1636
	PRDX1_HUMAN	Peroxiredoxin-1 OS=Homo sapiens GN=PRDX1 PE=1 SV=1	7	0.596012	1.07712	17.8886	18.0255	17.9796	18.1546	17.1272	17.6239	17.6715	17.2916
	FA98A_HUMAN	Protein FAM98A OS=Homo sapiens GN=FAM98A PE=1 SV=1	2	0.596269	1.11602	15.3142	16.0255	15.9617	15.4121	15.7777	15.8659	15.583	15.9665
	COX6C_HUMAN	Cytochrome c oxidase subunit 6C OS=Homo sapiens GN=COX6C PE=1 SV=2	5	0.597994	1.05939	18.4162	18.3323	18.1727	18.548	18.3205	18.0967	18.2338	18.4991
	NEUA_HUMAN	N-acylneuraminate cytidylyltransferase OS=Homo sapiens GN=CMAS PE=1 SV=2	2	0.598177	1.20031	14.0289	13.7731	14.1435	15.6466	15.0934	15.4127	15.789	15.276
	PTMA_HUMAN	Prothymosin alpha OS=Homo sapiens GN=PTMA PE=1 SV=2	3	0.598551	1.09279	15.8737	15.5269	14.6638	15.3508	15.0856	15.2934	15.1943	15.1584
	YKT6_HUMAN	Synaptobrevin homolog YKT6 OS=Homo sapiens GN=YKT6 PE=1 SV=1	3	0.600192	0.74443	14.1482	11.7391	13.9927	13.5173	14.3627	15.3866	13.812	13.9693
	SUGP2_HUMAN	SURP and G-patch domain-containing protein 2 OS=Homo sapiens GN=SUGP2 PE=1 SV=2	16	0.600624	1.04296	17.2062	16.9712	17.2651	17.3568	17.1566	17.4063	17.3325	17.4687
	RL29_HUMAN	60S ribosomal protein L29 OS=Homo sapiens GN=RPL29 PE=1 SV=2	2	0.600723	1.15468	18.0157	17.7208	17.2971	18.5547	18.2265	18.0769	18.4388	18.4557
	BOP1_HUMAN	Ribosome biogenesis protein BOP1 OS=Homo sapiens GN=BOP1 PE=1 SV=2	5	0.601905	1.21692	16.7972	16.9591	15.2286	15.5502	16.7124	15.8474	16.031	17.5453
	ZYX_HUMAN	Zyxin OS=Homo sapiens GN=ZYX PE=1 SV=1	2	0.602332	1.46333	13.0375	13.3911	11.2057	14.3514	12.4576	12.5424	14.2366	12.8496
	SUN1_HUMAN	SUN domain-containing protein 1 OS=Homo sapiens GN=SUN1 PE=1 SV=3	15	0.603818	1.08752	18.0665	17.8111	17.4168	18.1304	18.2593	18.3439	18.4306	18.3719
	VIME_HUMAN	Vimentin OS=Homo sapiens GN=VIM PE=1 SV=4	71	0.604191	1.08868	27.5132	27.6051	27.3363	28.0665	27.5171	27.3046	27.3216	27.2023
	H2AX_HUMAN	Histone H2AX OS=Homo sapiens GN=H2AFX PE=1 SV=2	2	0.604427	1.12323	18.9038	18.7369	19.1329	19.5015	19.6325	20.5196	19.9869	19.5686
	H12_HUMAN	Histone H1.2 OS=Homo sapiens GN=HIST1H1C PE=1 SV=2	7	0.604603	1.27567	23.5667	23.65	22.6665	24.8075	23.5593	23.249	23.5496	23.0406
	KDIS_HUMAN	Kinase D-interacting substrate of 220 kDa OS=Homo sapiens GN=KIDINS220 PE=1 SV=3	4	0.605133	1.19404	14.5177	16.0374	16.0232	15.4581	15.9047	15.9503	16.371	16.3943
	MERL_HUMAN	Merlin OS=Homo sapiens GN=NF2 PE=1 SV=1	11	0.605526	0.966643	17.6585	17.6848	17.9372	17.7586	17.9314	17.7322	17.8818	18.0375
	SYMC_HUMAN	Methionine--tRNA ligase, cytoplasmic OS=Homo sapiens GN=MARS PE=1 SV=2	15	0.605551	1.08005	18.0464	18.3844	18.0292	17.8867	18.2651	17.9824	17.6657	18.1975
	ATLA2_HUMAN	Atlastin-2 OS=Homo sapiens GN=ATL2 PE=1 SV=2	6	0.605713	1.0797	17.5173	17.9821	17.7091	17.5592	18.0006	17.713	17.5048	17.9199
	GPX8_HUMAN	Probable glutathione peroxidase 8 OS=Homo sapiens GN=GPX8 PE=1 SV=2	2	0.606329	0.703409	11.9666	13.9661	15.8635	15.128	15.2042	14.0347	16.6832	14.5584
	PURA_HUMAN	Transcriptional activator protein Pur-alpha OS=Homo sapiens GN=PURA PE=1 SV=2	2	0.607206	1.23793	14.9695	15.8667	16.285	15.2323	14.4225	15.8155	16.0393	16.0337
	ECI2_HUMAN	Enoyl-CoA delta isomerase 2, mitochondrial OS=Homo sapiens GN=ECI2 PE=1 SV=4	11	0.607553	1.01007	18.627	18.6709	18.9027	18.8577	18.6193	18.6112	18.4471	18.5142
	ATRX_HUMAN	Transcriptional regulator ATRX OS=Homo sapiens GN=ATRX PE=1 SV=5	10	0.608031	0.842066	15.9282	14.617	16.3037	16.2793	16.3173	15.8844	15.9993	16.7758
	ERGI3_HUMAN	Endoplasmic reticulum-Golgi intermediate compartment protein 3 OS=Homo sapiens GN=ERGIC3 PE=1 SV=1	2	0.60804	0.791147	12.7278	13.486	14.2155	12.2203	13.4553	13.6225	14.7364	14.4543
	CERS2_HUMAN	Ceramide synthase 2 OS=Homo sapiens GN=CERS2 PE=1 SV=1	6	0.608052	0.861046	18.0552	18.4875	18.6352	17.345	18.6931	18.5318	18.5115	18.6673
	UB2J1_HUMAN	Ubiquitin-conjugating enzyme E2 J1 OS=Homo sapiens GN=UBE2J1 PE=1 SV=2	2	0.610276	0.887869	13.4576	12.5477	13.6503	14.2186	12.8955	12.6698	13.9093	13.7903
	RL18A_HUMAN	60S ribosomal protein L18a OS=Homo sapiens GN=RPL18A PE=1 SV=2	9	0.610759	0.951032	19.1925	19.472	19.4965	19.3798	19.4317	19.0978	19.6508	19.5323
	LTOR2_HUMAN	Ragulator complex protein LAMTOR2 OS=Homo sapiens GN=LAMTOR2 PE=1 SV=1	2	0.611292	0.561283	12.0901	15.2443	15.5863	15.2092	15.1702	12.3079	15.6393	12.3917
	1B54_HUMAN	HLA class I histocompatibility antigen, B-54 alpha chain OS=Homo sapiens GN=HLA-B PE=1 SV=1	0	0.612885	1.25389	15.8122	16.0698	15.0429	13.7663	15.2047	16.1876	15.1118	16.4536
	COX5A_HUMAN	Cytochrome c oxidase subunit 5A, mitochondrial OS=Homo sapiens GN=COX5A PE=1 SV=2	5	0.614234	0.832982	15.916	16.6748	18.5763	17.1538	17.5974	17.7602	18.1485	17.5948
	SURF1_HUMAN	Surfeit locus protein 1 OS=Homo sapiens GN=SURF1 PE=1 SV=1	2	0.614277	0.744112	15.4846	13.6938	15.5776	14.3523	15.5891	15.2183	12.5733	14.2546
	ICT1_HUMAN	Peptidyl-tRNA hydrolase ICT1, mitochondrial OS=Homo sapiens GN=ICT1 PE=1 SV=1	2	0.614578	1.43136	15.5567	14.4171	10.8824	11.9012	16.2931	15.5746	12.9069	15.8158
	LG3BP_HUMAN	Galectin-3-binding protein OS=Homo sapiens GN=LGALS3BP PE=1 SV=1	10	0.616179	1.03171	17.946	18.1226	18.168	18.3227	18.0738	17.8984	17.9942	18.0186
	CEPT1_HUMAN	Choline/ethanolaminephosphotransferase 1 OS=Homo sapiens GN=CEPT1 PE=1 SV=1	2	0.618565	0.414151	17.0271	16.6135	17.1076	11.5549	11.9934	16.818	17.5614	13.6159
	SGTA_HUMAN	Small glutamine-rich tetratricopeptide repeat-containing protein alpha OS=Homo sapiens GN=SGTA PE=1 SV=1	2	0.618573	1.24802	12.5622	12.6228	12.8023	11.7458	11.7748	12.3179	11.396	13.1273
	H2B1M_HUMAN	Histone H2B type 1-M OS=Homo sapiens GN=HIST1H2BM PE=1 SV=3;sp	3	0.619581	1.07057	25.5621	25.3478	24.8424	25.32	25.3052	25.1077	24.9481	25.2758
	MSH2_HUMAN	DNA mismatch repair protein Msh2 OS=Homo sapiens GN=MSH2 PE=1 SV=1	5	0.619771	0.801773	15.2258	15.3658	15.9281	13.9141	15.1789	15.762	15.7215	15.7375
	PLIN3_HUMAN	Perilipin-3 OS=Homo sapiens GN=PLIN3 PE=1 SV=3	9	0.62074	1.09554	16.1029	16.4171	16.139	16.7579	15.5484	15.6558	16.3556	15.8418
	TDIF2_HUMAN	Deoxynucleotidyltransferase terminal-interacting protein 2 OS=Homo sapiens GN=DNTTIP2 PE=1 SV=2	7	0.621215	1.12369	16.2742	16.059	15.3189	16.3926	16.1659	15.9641	15.6089	15.6251
	NUMA1_HUMAN	Nuclear mitotic apparatus protein 1 OS=Homo sapiens GN=NUMA1 PE=1 SV=2	62	0.622067	0.962372	20.4133	20.1011	20.318	20.4806	20.2501	20.1498	20.2264	20.255
	CBX3_HUMAN	Chromobox protein homolog 3 OS=Homo sapiens GN=CBX3 PE=1 SV=4	6	0.622277	0.936296	16.3028	15.9044	16.3041	16.3583	16.1536	16.4786	16.9088	16.5481
	PRPS2_HUMAN	Ribose-phosphate pyrophosphokinase 2 OS=Homo sapiens GN=PRPS2 PE=1 SV=2;sp	5	0.623204	0.769421	14.5109	15.3241	16.3516	14.0655	14.3033	14.7554	15.609	15.1172
	PFKAP_HUMAN	ATP-dependent 6-phosphofructokinase, platelet type OS=Homo sapiens GN=PFKP PE=1 SV=2	10	0.624248	1.08632	18.2144	18.0443	17.9934	17.8485	17.8818	17.9098	17.5564	18.3212
	H32_HUMAN	Histone H3.2 OS=Homo sapiens GN=HIST2H3A PE=1 SV=3	1	0.624468	0.799545	25.0737	23.976	23.6752	24.8934	23.6845	23.6718	23.8848	22.4861
	UBQL4_HUMAN	Ubiquilin-4 OS=Homo sapiens GN=UBQLN4 PE=1 SV=2	1	0.624822	0.809317	11.8687	12.7808	14.4621	13.9558	13.9528	12.2036	14.0794	14.2018
	PCP_HUMAN	Lysosomal Pro-X carboxypeptidase OS=Homo sapiens GN=PRCP PE=1 SV=1	7	0.625022	0.929652	17.6133	17.3065	17.1951	16.6429	17.3211	17.5257	17.2988	17.5323
	UQCC1_HUMAN	Ubiquinol-cytochrome-c reductase complex assembly factor 1 OS=Homo sapiens GN=UQCC1 PE=1 SV=3	3	0.625157	1.06111	17.1147	16.8819	16.2757	16.2384	16.6551	16.7554	16.0451	16.5572
	RAP2A_HUMAN	Ras-related protein Rap-2a OS=Homo sapiens GN=RAP2A PE=1 SV=1	1	0.625233	1.45218	12.8586	10.553	11.3529	13.1934	9.70586	11.6643	12.8898	13.5494
	VAMP5_HUMAN	Vesicle-associated membrane protein 5 OS=Homo sapiens GN=VAMP5 PE=1 SV=1	2	0.625788	1.34516	15.4828	17.3476	17.0562	16.3112	13.2835	14.9957	17.2572	16.1363
	MASU1_HUMAN	Mitochondrial assembly of ribosomal large subunit protein 1 OS=Homo sapiens GN=MALSU1 PE=1 SV=1	2	0.625984	1.47181	14.0086	13.5944	13.8055	13.288	13.0202	16.668	12.6585	12.1727
	ML12A_HUMAN	Myosin regulatory light chain 12A OS=Homo sapiens GN=MYL12A PE=1 SV=2;sp	7	0.627281	1.17893	17.5191	18.6078	18.6353	18.3202	18.2558	17.5521	17.813	18.6931
	RAB18_HUMAN	Ras-related protein Rab-18 OS=Homo sapiens GN=RAB18 PE=1 SV=1	12	0.627672	1.09017	19.0371	19.4205	18.9545	19.4525	19.295	18.7601	18.7223	18.8739
	LMNA_HUMAN	Prelamin-A/C OS=Homo sapiens GN=LMNA PE=1 SV=1	79	0.62784	1.07039	24.7605	24.5761	24.4397	25.0598	24.6167	24.4997	24.5591	24.633
	RU2A_HUMAN	U2 small nuclear ribonucleoprotein A OS=Homo sapiens GN=SNRPA1 PE=1 SV=2	10	0.628423	0.919702	18.4949	18.3854	18.0175	18.1438	18.4669	18.723	18.5275	17.7717
	RS25_HUMAN	40S ribosomal protein S25 OS=Homo sapiens GN=RPS25 PE=1 SV=1	4	0.628553	1.2716	16.1276	17.9229	17.2215	16.1125	16.7309	16.4553	16.8382	17.8141
	TBAL3_HUMAN	Tubulin alpha chain-like 3 OS=Homo sapiens GN=TUBAL3 PE=1 SV=2	1	0.629603	1.19516	13.8795	14.7758	13.831	13.7227	13.3711	14.5383	12.9108	11.9845
	DNJB1_HUMAN	DnaJ homolog subfamily B member 1 OS=Homo sapiens GN=DNAJB1 PE=1 SV=4	2	0.630227	1.28666	13.5736	13.1463	13.182	13.5422	11.4149	13.6953	14.5027	13.744
	SEC20_HUMAN	Vesicle transport protein SEC20 OS=Homo sapiens GN=BNIP1 PE=1 SV=3	3	0.630821	1.21427	15.0085	16.0627	15.452	16.0858	16.1719	14.9007	15.1991	15.9025
	CH10_HUMAN	10 kDa heat shock protein, mitochondrial OS=Homo sapiens GN=HSPE1 PE=1 SV=2	7	0.63114	1.15344	18.3833	18.9219	18.8618	19.9391	18.5795	18.4986	18.9508	18.2396
	VAMP3_HUMAN	Vesicle-associated membrane protein 3 OS=Homo sapiens GN=VAMP3 PE=1 SV=3	3	0.631402	1.15275	19.0635	18.5601	18.3339	19.5882	18.9754	18.765	18.7105	18.9902
	ATX10_HUMAN	Ataxin-10 OS=Homo sapiens GN=ATXN10 PE=1 SV=1	4	0.63192	0.83754	16.6672	15.5422	16.9024	16.2376	15.9755	17.0797	16.8271	16.4896
	TEBP_HUMAN	Prostaglandin E synthase 3 OS=Homo sapiens GN=PTGES3 PE=1 SV=1	3	0.631982	0.852382	15.667	15.6101	16.3874	15.7983	15.9207	16.8028	16.8138	15.656
	CND3_HUMAN	Condensin complex subunit 3 OS=Homo sapiens GN=NCAPG PE=1 SV=1	2	0.632706	0.782366	13.8542	13.1517	12.9022	13.2105	13.5406	14.5694	14.4196	12.3686
	POLG_HCVJ1	Genome polyprotein OS=Hepatitis C virus genotype 1b (isolate HC-J1) PE=1 SV=1;sp	2	0.633232	0.753443	16.9138	17.2264	16.2064	17.4499	15.1811	12.8515	17.6933	16.8331
	PTTG_HUMAN	Pituitary tumor-transforming gene 1 protein-interacting protein OS=Homo sapiens GN=PTTG1IP PE=1 SV=1	2	0.633404	1.37116	13.941	14.3752	15.3346	14.8187	12.8895	15.7717	15.3474	14.3684
	SMRC1_HUMAN	SWI/SNF complex subunit SMARCC1 OS=Homo sapiens GN=SMARCC1 PE=1 SV=3	3	0.634715	0.834849	14.7667	15.5501	16.4634	14.873	15.6634	15.421	15.8396	15.8473
	VAMP2_HUMAN	Vesicle-associated membrane protein 2 OS=Homo sapiens GN=VAMP2 PE=1 SV=3	1	0.635575	0.694345	14.3353	14.4244	14.8249	14.749	14.7485	11.3565	13.27	14.5438
	SPRY4_HUMAN	SPRY domain-containing protein 4 OS=Homo sapiens GN=SPRYD4 PE=1 SV=2	5	0.636581	1.44212	13.5075	15.9273	15.8363	13.5661	14.6014	16.0168	13.8066	14.3543
	CUL4A_HUMAN	Cullin-4A OS=Homo sapiens GN=CUL4A PE=1 SV=3	1	0.637545	0.892103	13.8017	13.7418	14.3912	14.7587	13.7054	12.6322	13.714	13.8208
	MPRD_HUMAN	Cation-dependent mannose-6-phosphate receptor OS=Homo sapiens GN=M6PR PE=1 SV=1	3	0.637576	1.08191	17.017	16.6379	17.3647	17.344	16.6342	16.8266	16.2469	16.9087
	ERD22_HUMAN	ER lumen protein-retaining receptor 2 OS=Homo sapiens GN=KDELR2 PE=1 SV=1	1	0.637652	0.732049	15.2692	15.0855	14.6692	12.9323	12.8638	14.7494	15.0281	13.2631
	TPP1_PANTR	Tripeptidyl-peptidase 1 OS=Pan troglodytes GN=TPP1 PE=2 SV=1;sp	6	0.638616	0.934916	17.6928	18.0453	18.2895	17.8022	17.9353	17.9833	18.2385	17.9369
	WDR82_HUMAN	WD repeat-containing protein 82 OS=Homo sapiens GN=WDR82 PE=1 SV=1	3	0.638652	0.853743	15.3854	15.3849	15.5972	14.0846	15.0703	15.5195	13.5947	13.7461
	RM27_HUMAN	39S ribosomal protein L27, mitochondrial OS=Homo sapiens GN=MRPL27 PE=1 SV=1	2	0.638788	1.29434	15.3629	15.4708	15.1906	15.7389	13.0857	15.2392	15.7132	14.3924
	PSA2_HUMAN	Proteasome subunit alpha type-2 OS=Homo sapiens GN=PSMA2 PE=1 SV=2	6	0.640575	1.29776	14.8803	16.6482	17.3275	16.0493	15.5284	16.9379	17.0389	16.6437
	PLCE_HUMAN	1-acyl-sn-glycerol-3-phosphate acyltransferase epsilon OS=Homo sapiens GN=AGPAT5 PE=1 SV=3	5	0.640922	1.22601	17.3924	17.3343	15.7115	15.7356	15.3641	17.2902	16.7126	15.9964
	HCDH_HUMAN	Hydroxyacyl-coenzyme A dehydrogenase, mitochondrial OS=Homo sapiens GN=HADH PE=1 SV=3	13	0.641034	0.891674	20.0061	20.1233	20.5583	20.7321	20.3898	20.5623	20.7948	19.6698
	3HIDH_HUMAN	3-hydroxyisobutyrate dehydrogenase, mitochondrial OS=Homo sapiens GN=HIBADH PE=1 SV=2	11	0.64145	1.03621	18.5778	18.7816	18.7153	18.6915	18.2679	18.4888	18.9559	18.7602
	ZO2_HUMAN	Tight junction protein ZO-2 OS=Homo sapiens GN=TJP2 PE=1 SV=2	5	0.641935	0.846238	14.3971	13.7276	13.8665	14.9788	14.713	14.3101	15.0289	14.0256
	HNRPF_HUMAN	Heterogeneous nuclear ribonucleoprotein F OS=Homo sapiens GN=HNRNPF PE=1 SV=3	10	0.642025	0.868126	18.3488	18.5351	18.4921	19.0922	18.2931	17.9222	19.0193	17.7878
	NFU1_HUMAN	NFU1 iron-sulfur cluster scaffold homolog, mitochondrial OS=Homo sapiens GN=NFU1 PE=1 SV=2	2	0.642927	1.14866	16.0742	16.7033	15.1018	15.0876	14.7803	15.7574	16.2121	15.4199
	TX264_HUMAN	Testis-expressed sequence 264 protein OS=Homo sapiens GN=TEX264 PE=1 SV=1	7	0.643193	1.04839	18.2947	18.2812	18.1914	18.146	18.1316	18.0031	17.6928	18.1528
	AKAP8_HUMAN	A-kinase anchor protein 8 OS=Homo sapiens GN=AKAP8 PE=1 SV=1	4	0.643696	0.863398	15.5948	14.7782	15.6502	16.3168	15.5245	15.8378	15.4286	14.4175
	FLII_HUMAN	Protein flightless-1 homolog OS=Homo sapiens GN=FLII PE=1 SV=2	6	0.643831	1.17156	14.8285	16.0113	15.3773	15.44	16.1967	15.2767	15.8595	16.4478
	CCAR1_HUMAN	Cell division cycle and apoptosis regulator protein 1 OS=Homo sapiens GN=CCAR1 PE=1 SV=2	16	0.644114	0.948123	18.4532	18.1623	18.5186	18.8761	18.396	18.1317	18.2688	18.1591
	TM115_HUMAN	Transmembrane protein 115 OS=Homo sapiens GN=TMEM115 PE=1 SV=1	2	0.644143	0.733153	14.4194	13.4593	13.399	12.1769	12.8626	14.9947	14.6505	12.9093
	NB5R1_HUMAN	NADH-cytochrome b5 reductase 1 OS=Homo sapiens GN=CYB5R1 PE=1 SV=1	11	0.644218	0.85735	18.6393	18.2304	17.398	17.9339	17.3608	17.7158	18.0659	16.6957
	NSMA3_HUMAN	Sphingomyelin phosphodiesterase 4 OS=Homo sapiens GN=SMPD4 PE=1 SV=2	6	0.644862	1.38366	13.6899	16.7694	16.0086	15.1074	15.9573	16.371	16.3993	15.6814
	NENF_HUMAN	Neudesin OS=Homo sapiens GN=NENF PE=1 SV=1	3	0.64529	0.652867	14.0885	13.3685	13.0134	15.7394	14.8188	11.8587	15.3087	13.8022
	FRYL_HUMAN	Protein furry homolog-like OS=Homo sapiens GN=FRYL PE=1 SV=2	10	0.647025	1.12461	15.6854	15.9404	14.743	13.9825	15.4085	15.7647	14.7172	15.5444
	RM02_HUMAN	39S ribosomal protein L2, mitochondrial OS=Homo sapiens GN=MRPL2 PE=1 SV=2	2	0.647711	1.13361	14.3095	15.4357	15.4367	15.4647	16.3328	15.7279	15.3304	15.5049
	PCNA_HUMAN	Proliferating cell nuclear antigen OS=Homo sapiens GN=PCNA PE=1 SV=1	10	0.647973	1.1238	18.694	18.4691	18.7309	18.4974	18.1009	19.2579	18.6968	18.6717
	SYYM_HUMAN	Tyrosine--tRNA ligase, mitochondrial OS=Homo sapiens GN=YARS2 PE=1 SV=2	14	0.648016	1.08602	18.6376	19.2759	19.1395	18.8475	19.1902	18.9226	18.9179	19.3154
	RB27B_HUMAN	Ras-related protein Rab-27B OS=Homo sapiens GN=RAB27B PE=1 SV=4	4	0.649386	1.19846	17.096	16.9127	17.2552	16.4192	16.6729	17.1383	16.5159	18.1145
	CLCC1_HUMAN	Chloride channel CLIC-like protein 1 OS=Homo sapiens GN=CLCC1 PE=1 SV=1	9	0.649682	1.09856	17.3824	17.0365	16.8966	17.7733	17.5431	17.3782	17.687	17.8634
	EF1A2_HUMAN	Elongation factor 1-alpha 2 OS=Homo sapiens GN=EEF1A2 PE=1 SV=1	3	0.649827	0.64493	13.2769	15.5397	15.4534	11.5738	16.2485	15.9227	16.539	15.9506
	P66B_HUMAN	Transcriptional repressor p66-beta OS=Homo sapiens GN=GATAD2B PE=1 SV=1	3	0.650178	1.24255	15.0492	13.8924	14.5666	14.5	12.5456	14.3569	14.1395	14.805
	CSK21_HUMAN	Casein kinase II subunit alpha OS=Homo sapiens GN=CSNK2A1 PE=1 SV=1;sp	11	0.650404	1.04589	18.7774	18.9676	18.992	19.0489	19.0266	18.735	18.721	19.0245
	GTPBA_HUMAN	GTP-binding protein 10 OS=Homo sapiens GN=GTPBP10 PE=1 SV=1	3	0.651397	0.817621	14.8666	13.4219	13.1049	13.2945	15.0492	14.0328	14.8497	15.9592
	H33_HUMAN	Histone H3.3 OS=Homo sapiens GN=H3F3A PE=1 SV=2	2	0.65161	0.525318	19.8004	20.0344	20.0259	16.1392	16.935	20.7596	20.4865	16.5998
	LRC8D_HUMAN	Volume-regulated anion channel subunit LRRC8D OS=Homo sapiens GN=LRRC8D PE=1 SV=1	6	0.651721	0.861528	16.5431	16.1617	16.2126	14.9762	16.1198	16.0258	14.8969	15.7485
	CALX_HUMAN	Calnexin OS=Homo sapiens GN=CANX PE=1 SV=2	34	0.651844	1.04301	23.5013	23.428	23.1781	22.9996	23.2961	23.4157	23.2325	23.6077
	RL38_HUMAN	60S ribosomal protein L38 OS=Homo sapiens GN=RPL38 PE=1 SV=2	2	0.651847	1.11275	17.3575	17.7216	16.7621	17.5804	17.535	16.8806	16.8668	16.9553
	ETFB_HUMAN	Electron transfer flavoprotein subunit beta OS=Homo sapiens GN=ETFB PE=1 SV=3	10	0.652399	0.982353	18.6332	18.5636	18.2197	18.3136	17.8243	17.8406	17.3537	17.2103
	TMX1_HUMAN	Thioredoxin-related transmembrane protein 1 OS=Homo sapiens GN=TMX1 PE=1 SV=1	9	0.653227	0.95763	19.2429	19.1615	19.3263	19.1639	19.5186	19.2224	19.204	19.4942
	SNUT1_HUMAN	U4/U6.U5 tri-snRNP-associated protein 1 OS=Homo sapiens GN=SART1 PE=1 SV=1	13	0.653776	1.11286	17.0473	16.6447	16.2168	17.2386	16.699	16.8539	16.8839	16.7269
	CH60_HUMAN	60 kDa heat shock protein, mitochondrial OS=Homo sapiens GN=HSPD1 PE=1 SV=2	55	0.653892	1.06028	24.5527	24.7094	24.6474	25.1368	24.6132	24.6388	24.7793	24.4454
	CLPP_HUMAN	ATP-dependent Clp protease proteolytic subunit, mitochondrial OS=Homo sapiens GN=CLPP PE=1 SV=1	4	0.654621	1.02752	17.2429	17.0783	17.6386	17.7519	17.3807	17.584	17.8061	17.8108
	SIN3A_HUMAN	Paired amphipathic helix protein Sin3a OS=Homo sapiens GN=SIN3A PE=1 SV=2	6	0.655111	0.783479	15.3795	15.787	15.4681	13.0322	15.4712	15.398	14.9737	15.6671
	CLAP1_HUMAN	CLIP-associating protein 1 OS=Homo sapiens GN=CLASP1 PE=1 SV=1	3	0.65639	0.665239	13.3239	14.7033	15.1651	11.7036	14.9812	13.3301	12.6695	14.0504
	PSA7_HUMAN	Proteasome subunit alpha type-7 OS=Homo sapiens GN=PSMA7 PE=1 SV=1;sp	7	0.656549	0.933168	16.732	16.5522	16.8425	16.517	16.3547	16.8493	16.5174	16.129
	SNUT2_HUMAN	U4/U6.U5 tri-snRNP-associated protein 2 OS=Homo sapiens GN=USP39 PE=1 SV=2	9	0.656786	1.08237	17.651	17.5052	17.2935	17.3447	17.2698	18.0574	17.1977	16.9615
	VP26A_HUMAN	Vacuolar protein sorting-associated protein 26A OS=Homo sapiens GN=VPS26A PE=1 SV=2	2	0.657658	0.881295	14.5803	14.4539	14.8878	13.6409	14.6371	14.872	14.7773	15.1864
	RT63_HUMAN	Ribosomal protein 63, mitochondrial OS=Homo sapiens GN=MRPL57 PE=1 SV=1	2	0.657882	0.905573	14.3656	14.8193	14.2979	14.5566	14.7386	14.0319	14.7191	14.1411
	GCP60_HUMAN	Golgi resident protein GCP60 OS=Homo sapiens GN=ACBD3 PE=1 SV=4	2	0.658732	1.05716	13.2963	13.7182	13.8708	13.6128	14.0053	14.2986	14.6316	14.4952
	PDK1_HUMAN	[Pyruvate dehydrogenase (acetyl-transferring)] kinase isozyme 1, mitochondrial OS=Homo sapiens GN=PDK1 PE=1 SV=1	1	0.659338	1.31154	11.1848	13.5138	13.5677	13.6601	12.0685	12.7682	12.8784	11.3224
	THIO_HUMAN	Thioredoxin OS=Homo sapiens GN=TXN PE=1 SV=3	4	0.659743	1.25997	12.6719	12.8099	13.7865	15.8451	13.1357	13.5536	15.1726	13.8915
	THIC_HUMAN	Acetyl-CoA acetyltransferase, cytosolic OS=Homo sapiens GN=ACAT2 PE=1 SV=2	6	0.659926	1.12766	15.7168	16.3915	17.1326	16.2519	15.7851	16.171	16.8276	17.3409
	GEMI4_HUMAN	Gem-associated protein 4 OS=Homo sapiens GN=GEMIN4 PE=1 SV=2	2	0.661033	1.24172	13.9767	12.7263	12.2212	12.5792	11.2244	13.1279	13.7616	13.9998
	MCAT_HUMAN	Mitochondrial carnitine/acylcarnitine carrier protein OS=Homo sapiens GN=SLC25A20 PE=1 SV=1	6	0.662798	1.09968	17.1994	17.5893	17.6036	17.5101	17.4431	16.9159	16.9335	17.7127
	CAP1_HUMAN	Adenylyl cyclase-associated protein 1 OS=Homo sapiens GN=CAP1 PE=1 SV=5	10	0.666133	1.07804	18.0596	17.7284	18.0315	17.8784	17.2887	17.9856	17.9745	18.1955
	DAD1_HUMAN	Dolichyl-diphosphooligosaccharide--protein glycosyltransferase subunit DAD1 OS=Homo sapiens GN=DAD1 PE=1 SV=3	3	0.66697	1.16432	19.977	19.3645	18.421	19.4612	19.5595	19.0126	17.9767	18.9739
	ERAL1_HUMAN	GTPase Era, mitochondrial OS=Homo sapiens GN=ERAL1 PE=1 SV=2	5	0.667596	0.831741	12.7743	14.141	15.118	14.2111	14.9156	14.4695	14.9995	13.9226
	ANXA5_HUMAN	Annexin A5 OS=Homo sapiens GN=ANXA5 PE=1 SV=2	17	0.66865	1.15121	18.9827	19.1745	19.1229	18.1275	18.196	19.1581	19.0183	19.6723
	ARP2_HUMAN	Actin-related protein 2 OS=Homo sapiens GN=ACTR2 PE=1 SV=1	9	0.669152	0.887411	17.4906	16.6978	17.5436	16.8593	16.5003	17.2887	17.3713	17.3707
	MGME1_HUMAN	Mitochondrial genome maintenance exonuclease 1 OS=Homo sapiens GN=MGME1 PE=1 SV=1	2	0.669535	0.776594	12.5548	14.0231	14.6114	12.3531	13.2683	12.5884	14.239	14.2499
	NUP37_HUMAN	Nucleoporin Nup37 OS=Homo sapiens GN=NUP37 PE=1 SV=1	4	0.669667	1.04427	16.9067	17.1284	17.2133	16.9773	17.0707	16.9944	16.8326	17.1732
	SRSF2_HUMAN	Serine/arginine-rich splicing factor 2 OS=Homo sapiens GN=SRSF2 PE=1 SV=4	5	0.670369	1.11368	18.831	18.9579	17.5561	18.6346	17.8532	17.7296	18.1632	17.7027
	RBM10_HUMAN	RNA-binding protein 10 OS=Homo sapiens GN=RBM10 PE=1 SV=3	10	0.672191	0.940854	16.7004	17.1599	17.8153	17.6206	17.3501	17.1342	17.5713	17.1706
	ERP44_HUMAN	Endoplasmic reticulum resident protein 44 OS=Homo sapiens GN=ERP44 PE=1 SV=1	14	0.672459	1.0435	19.1435	19.1497	19.1398	18.9039	18.869	18.942	18.8713	19.2737
	NDUB6_HUMAN	NADH dehydrogenase [ubiquinone] 1 beta subcomplex subunit 6 OS=Homo sapiens GN=NDUFB6 PE=1 SV=3	4	0.672622	1.36036	16.2749	16.592	14.1269	16.9045	14.7081	15.2675	16.778	14.8998
	RS6_HUMAN	40S ribosomal protein S6 OS=Homo sapiens GN=RPS6 PE=1 SV=1	10	0.673164	0.87166	19.457	19.1853	18.9041	19.827	19.1616	18.8649	19.5818	18.4345
	NIT2_HUMAN	Omega-amidase NIT2 OS=Homo sapiens GN=NIT2 PE=1 SV=1	3	0.674202	0.77031	14.4236	13.127	14.1755	14.28	14.0945	12.104	12.6021	14.2788
	CKLF6_HUMAN	CKLF-like MARVEL transmembrane domain-containing protein 6 OS=Homo sapiens GN=CMTM6 PE=1 SV=1	2	0.674516	0.756996	14.6041	14.35	15.2371	12.4629	14.1681	14.2149	14.5247	15.8996
	COASY_HUMAN	Bifunctional coenzyme A synthase OS=Homo sapiens GN=COASY PE=1 SV=4	2	0.674674	0.844115	13.4108	14.3727	14.8206	13.5161	14.531	13.6003	13.9929	14.2884
	FRMD5_HUMAN	FERM domain-containing protein 5 OS=Homo sapiens GN=FRMD5 PE=1 SV=1	3	0.674972	1.45237	14.802	14.8994	14.7823	12.7009	13.7167	14.2863	11.5129	15.081
	SNW1_HUMAN	SNW domain-containing protein 1 OS=Homo sapiens GN=SNW1 PE=1 SV=1	4	0.676639	0.90427	16.4276	16.1924	16.5087	15.8082	16.5043	16.1035	15.9578	16.7137
	SAR1A_HUMAN	GTP-binding protein SAR1a OS=Homo sapiens GN=SAR1A PE=1 SV=1	4	0.677107	1.08693	16.8757	17.5156	17.4125	17.6528	17.7541	17.1467	17.2457	17.4539
	IMA1_HUMAN	Importin subunit alpha-1 OS=Homo sapiens GN=KPNA2 PE=1 SV=1	11	0.677476	0.958275	19.0887	18.9221	18.9593	19.2047	19.297	18.9228	19.1032	19.1528
	ATPK_HUMAN	ATP synthase subunit f, mitochondrial OS=Homo sapiens GN=ATP5J2 PE=1 SV=3	3	0.67798	1.06924	20.4354	21.0184	20.6401	20.5232	20.7373	20.3704	20.4792	20.7664
	EXOSX_HUMAN	Exosome component 10 OS=Homo sapiens GN=EXOSC10 PE=1 SV=2	7	0.677986	0.818089	14.9186	15.587	15.8459	13.9788	15.8029	15.0487	14.5365	15.3307
	PPGB_HUMAN	Lysosomal protective protein OS=Homo sapiens GN=CTSA PE=1 SV=2	2	0.679341	0.882884	15.7157	15.1084	14.7872	15.1443	14.0329	12.966	14.2598	14.858
	XPO2_HUMAN	Exportin-2 OS=Homo sapiens GN=CSE1L PE=1 SV=3	23	0.67997	0.961954	20.0296	20.2997	20.9073	20.8974	20.8245	20.5391	20.9125	20.7139
	ESYT1_HUMAN	Extended synaptotagmin-1 OS=Homo sapiens GN=ESYT1 PE=1 SV=1	43	0.681016	0.971709	21.5349	21.4356	21.5425	21.6301	21.5766	21.3028	21.313	21.4329
	ORC2_HUMAN	Origin recognition complex subunit 2 OS=Homo sapiens GN=ORC2 PE=1 SV=2	2	0.681794	0.800969	14.72	14.7605	14.8279	12.4143	14.1662	14.686	13.3526	13.9252
	TNPO2_HUMAN	Transportin-2 OS=Homo sapiens GN=TNPO2 PE=1 SV=3	5	0.681841	0.903783	12.4069	13.1575	13.8361	13.2536	13.9028	13.2529	13.7308	13.6287
	DDX1_HUMAN	ATP-dependent RNA helicase DDX1 OS=Homo sapiens GN=DDX1 PE=1 SV=2	12	0.682015	1.15147	17.4434	17.5054	17.6859	17.0923	17.041	18.5315	17.7801	17.6351
	CSN3_HUMAN	COP9 signalosome complex subunit 3 OS=Homo sapiens GN=COPS3 PE=1 SV=3	2	0.682384	0.906483	15.3055	15.417	15.4723	14.4193	14.7984	15.174	15.4191	15.4184
	C1TC_HUMAN	C-1-tetrahydrofolate synthase, cytoplasmic OS=Homo sapiens GN=MTHFD1 PE=1 SV=3	9	0.68246	1.12096	16.4895	16.3942	16.8344	16.2437	15.3475	16.4919	16.4452	16.6457
	YIF1B_HUMAN	Protein YIF1B OS=Homo sapiens GN=YIF1B PE=1 SV=1	2	0.683389	1.2019	14.6656	16.6824	16.8998	16.6873	17.0476	16.4909	16.9037	16.7175
	COQ9_HUMAN	Ubiquinone biosynthesis protein COQ9, mitochondrial OS=Homo sapiens GN=COQ9 PE=1 SV=1	2	0.683608	0.781832	12.2656	14.2043	15.4215	13.7541	14.5954	13.8609	15.0069	14.0499
	LC7L2_HUMAN	Putative RNA-binding protein Luc7-like 2 OS=Homo sapiens GN=LUC7L2 PE=1 SV=2	3	0.685738	1.09315	16.0824	15.4079	15.8617	16.546	16.0615	16.2387	16.5839	16.9108
	ACOD_HUMAN	Acyl-CoA desaturase OS=Homo sapiens GN=SCD PE=1 SV=2	2	0.686235	0.721863	11.8655	13.0329	12.4678	12.4356	11.9454	12.4804	15.4037	11.8526
	RED_HUMAN	Protein Red OS=Homo sapiens GN=IK PE=1 SV=3	11	0.686728	1.12612	17.3429	16.9047	17.2738	17.4174	17.5736	17.2867	16.4222	17.6892
	CD2B2_HUMAN	CD2 antigen cytoplasmic tail-binding protein 2 OS=Homo sapiens GN=CD2BP2 PE=1 SV=1	3	0.686918	1.20319	15.4035	15.0907	15.1669	14.3318	15.0225	15.304	13.9052	15.839
	CTBP2_HUMAN	C-terminal-binding protein 2 OS=Homo sapiens GN=CTBP2 PE=1 SV=1	3	0.687171	0.603327	13.9703	12.709	15.6774	12.0714	12.6495	16.6243	13.91	11.8865
	CN166_HUMAN	UPF0568 protein C14orf166 OS=Homo sapiens GN=C14orf166 PE=1 SV=1	5	0.688159	0.87396	15.5291	16.4732	16.5666	15.4026	15.8312	15.7338	16.4456	15.9855
	LMO7_HUMAN	LIM domain only protein 7 OS=Homo sapiens GN=LMO7 PE=1 SV=3	6	0.688544	1.08442	16.5705	16.0878	16.3067	16.8324	16.4822	16.31	16.2489	16.8457
	CUTA_HUMAN	Protein CutA OS=Homo sapiens GN=CUTA PE=1 SV=2	2	0.689239	1.25823	15.3081	16.0078	16.2526	16.4343	14.7658	16.805	15.5976	14.0027
	EWS_HUMAN	RNA-binding protein EWS OS=Homo sapiens GN=EWSR1 PE=1 SV=1	5	0.689604	0.920183	17.4718	17.7304	17.703	18.1345	17.8375	17.3295	17.7996	17.1374
	U2AF2_HUMAN	Splicing factor U2AF 65 kDa subunit OS=Homo sapiens GN=U2AF2 PE=1 SV=4	12	0.689716	1.06612	20.2677	19.7471	19.7751	19.9641	19.7245	20.0028	19.6647	20.0876
	TM165_HUMAN	Transmembrane protein 165 OS=Homo sapiens GN=TMEM165 PE=1 SV=1	4	0.690345	1.0471	17.5725	17.2316	16.9984	17.1446	17.5632	17.6374	17.4674	17.8534
	TFB2M_HUMAN	Dimethyladenosine transferase 2, mitochondrial OS=Homo sapiens GN=TFB2M PE=1 SV=1	2	0.690566	0.928964	16.1719	16.6477	16.5402	16.3338	16.5542	15.8607	16.5317	16.5307
	SNR40_HUMAN	U5 small nuclear ribonucleoprotein 40 kDa protein OS=Homo sapiens GN=SNRNP40 PE=1 SV=1	4	0.691848	0.949741	14.8188	15.1632	16.0904	16.1508	15.9747	15.6507	15.867	15.4886
	SART3_HUMAN	Squamous cell carcinoma antigen recognized by T-cells 3 OS=Homo sapiens GN=SART3 PE=1 SV=1	7	0.691931	0.8942	16.8975	16.1797	16.3217	16.8468	16.6197	17.0451	16.7621	15.8841
	ASAH1_HUMAN	Acid ceramidase OS=Homo sapiens GN=ASAH1 PE=1 SV=5	8	0.692625	1.10383	17.7153	18.5945	18.0853	17.3765	18.1519	18.2773	17.8339	18.1081
	PEBP1_HUMAN	Phosphatidylethanolamine-binding protein 1 OS=Homo sapiens GN=PEBP1 PE=1 SV=3	2	0.695232	1.09814	15.0684	15.2924	15.5052	15.8733	14.7475	15.4501	15.9962	15.2417
	NB5R3_HUMAN	NADH-cytochrome b5 reductase 3 OS=Homo sapiens GN=CYB5R3 PE=1 SV=3	17	0.69537	0.967402	21.7721	21.5964	21.7247	21.453	21.6248	21.6553	21.5316	21.7573
	PSA_HUMAN	Puromycin-sensitive aminopeptidase OS=Homo sapiens GN=NPEPPS PE=1 SV=2	11	0.695509	1.0747	16.9578	17.6798	18.0221	17.5674	17.2039	17.2496	17.2113	17.314
	SUCB2_HUMAN	Succinate--CoA ligase [GDP-forming] subunit beta, mitochondrial OS=Homo sapiens GN=SUCLG2 PE=1 SV=2	18	0.696448	1.05324	18.9968	19.3632	19.2281	19.5252	19.1832	18.7801	18.9826	19.0216
	TBA1B_HUMAN	Tubulin alpha-1B chain OS=Homo sapiens GN=TUBA1B PE=1 SV=1	0	0.696869	1.0235	23.1395	23.3318	23.3596	23.1788	22.9557	23.0339	23.0594	23.1038
	RAB35_HUMAN	Ras-related protein Rab-35 OS=Homo sapiens GN=RAB35 PE=1 SV=1	10	0.696874	1.05418	18.5619	18.4737	18.4722	18.5717	18.7477	18.4818	18.1656	18.7248
	CYBP_HUMAN	Calcyclin-binding protein OS=Homo sapiens GN=CACYBP PE=1 SV=2	2	0.697853	0.806628	12.0677	13.6404	14.8565	12.9435	13.1416	12.4104	13.5088	13.3402
	S27A3_HUMAN	Long-chain fatty acid transport protein 3 OS=Homo sapiens GN=SLC27A3 PE=2 SV=3	8	0.698842	0.960877	16.4104	16.3987	16.7215	16.9306	16.8378	16.4035	16.4232	16.4297
	CNDD3_HUMAN	Condensin-2 complex subunit D3 OS=Homo sapiens GN=NCAPD3 PE=1 SV=2	3	0.699982	0.910301	15.0724	15.5794	15.2602	15.3111	15.6581	14.642	15.649	15.5648
	AT5F1_HUMAN	ATP synthase F(0) complex subunit B1, mitochondrial OS=Homo sapiens GN=ATP5F1 PE=1 SV=2	17	0.700456	1.02819	21.2356	21.4688	21.2786	21.3605	21.3224	21.1019	21.2154	21.2812
	SF3B3_HUMAN	Splicing factor 3B subunit 3 OS=Homo sapiens GN=SF3B3 PE=1 SV=4	30	0.701468	1.01274	20.4498	20.51	20.6151	20.592	20.4645	20.385	20.4501	20.5656
	ACPM_HUMAN	Acyl carrier protein, mitochondrial OS=Homo sapiens GN=NDUFAB1 PE=1 SV=3	4	0.701536	1.04115	18.2326	18.1924	18.2089	18.613	17.6276	17.7466	18.2258	17.9756
	NIPS1_HUMAN	Protein NipSnap homolog 1 OS=Homo sapiens GN=NIPSNAP1 PE=1 SV=1	7	0.701864	0.904153	18.1859	17.3726	19.3746	19.3401	18.9224	18.4174	18.0464	18.8178
	SRRM2_HUMAN	Serine/arginine repetitive matrix protein 2 OS=Homo sapiens GN=SRRM2 PE=1 SV=2	30	0.702352	1.05961	20.2188	19.938	19.8036	20.4527	20.0259	20.0228	20.0004	19.9693
	PANX1_HUMAN	Pannexin-1 OS=Homo sapiens GN=PANX1 PE=1 SV=4	4	0.703391	1.08842	14.0545	14.9427	14.6036	14.3792	15.0452	14.6212	15.35	15.5992
	PSA3_HUMAN	Proteasome subunit alpha type-3 OS=Homo sapiens GN=PSMA3 PE=1 SV=2	5	0.703741	1.0633	16.8849	16.9279	17.0861	16.9498	16.0426	16.7396	17.0793	16.8297
	CYB5B_HUMAN	Cytochrome b5 type B OS=Homo sapiens GN=CYB5B PE=1 SV=2	7	0.704193	0.971458	20.3542	20.0836	19.988	19.8962	20.2363	20.2196	20.0423	20.2544
	RPP40_HUMAN	Ribonuclease P protein subunit p40 OS=Homo sapiens GN=RPP40 PE=1 SV=3	2	0.704317	1.21949	11.4319	13.2956	13.3001	11.9473	12.5067	13.3046	13.6536	13.4898
	TM9S3_HUMAN	Transmembrane 9 superfamily member 3 OS=Homo sapiens GN=TM9SF3 PE=1 SV=2	5	0.704351	1.13345	16.6957	16.343	17.0165	18.0512	16.8994	16.1509	16.2528	17.0422
	DDX42_HUMAN	ATP-dependent RNA helicase DDX42 OS=Homo sapiens GN=DDX42 PE=1 SV=1	10	0.704954	1.02632	17.0292	16.9645	17.3407	17.3345	17.1684	17.0863	17.4929	17.7958
	SF3B2_HUMAN	Splicing factor 3B subunit 2 OS=Homo sapiens GN=SF3B2 PE=1 SV=2	29	0.705091	0.946427	20.1416	19.7761	19.8855	20.3662	19.9499	19.6921	19.983	19.8078
	HSPB1_HUMAN	Heat shock protein beta-1 OS=Homo sapiens GN=HSPB1 PE=1 SV=2	5	0.705251	0.888629	17.5523	17.7752	17.7873	18.1491	17.6372	17.7606	18.8813	17.4919
	ELOV5_HUMAN	Elongation of very long chain fatty acids protein 5 OS=Homo sapiens GN=ELOVL5 PE=1 SV=1	2	0.705303	1.04276	18.475	18.3649	17.8218	18.2201	18.7156	18.4736	18.2257	18.421
	BAX_HUMAN	Apoptosis regulator BAX OS=Homo sapiens GN=BAX PE=1 SV=1	5	0.705492	0.879981	16.9373	15.4312	17.0991	17.4967	17.032	17.2497	17.0794	17.2324
	HNRH3_HUMAN	Heterogeneous nuclear ribonucleoprotein H3 OS=Homo sapiens GN=HNRNPH3 PE=1 SV=2	7	0.70556	0.939594	18.8661	18.8536	19.2637	19.6207	18.9562	18.9343	19.478	18.7959
	ARPC2_HUMAN	Actin-related protein 2/3 complex subunit 2 OS=Homo sapiens GN=ARPC2 PE=1 SV=1	6	0.706371	0.961067	16.2795	16.3328	16.9434	17.2148	16.6817	16.3259	16.7018	16.5036
	CCD51_HUMAN	Coiled-coil domain-containing protein 51 OS=Homo sapiens GN=CCDC51 PE=1 SV=2	3	0.707724	1.04771	14.2276	14.0642	14.7655	15.2817	14.6647	14.7647	15.0269	14.8429
	LEMD2_HUMAN	LEM domain-containing protein 2 OS=Homo sapiens GN=LEMD2 PE=1 SV=1	11	0.708262	0.970438	18.2084	18.2986	17.5449	17.1933	18.0935	18.0901	17.9304	18.022
	LIPB1_HUMAN	Liprin-beta-1 OS=Homo sapiens GN=PPFIBP1 PE=1 SV=2	4	0.708783	1.12348	14.4204	14.5328	14.365	13.4021	14.2993	15.1612	13.1554	13.8159
	PDS5A_HUMAN	Sister chromatid cohesion protein PDS5 homolog A OS=Homo sapiens GN=PDS5A PE=1 SV=1	13	0.708833	1.04701	16.8819	16.5585	16.7658	17.2148	17.0237	17.1769	17.1649	17.1511
	PIEZ1_HUMAN	Piezo-type mechanosensitive ion channel component 1 OS=Homo sapiens GN=PIEZO1 PE=1 SV=4	3	0.709171	0.85266	13.2881	13.8884	14.2489	12.3647	14.4834	14.6136	14.1206	14.3546
	SCRIB_HUMAN	Protein scribble homolog OS=Homo sapiens GN=SCRIB PE=1 SV=4	15	0.709522	0.913878	17.8251	18.5151	18.4215	18.1395	18.7097	17.8662	18.4046	18.3204
	MYPT1_HUMAN	Protein phosphatase 1 regulatory subunit 12A OS=Homo sapiens GN=PPP1R12A PE=1 SV=1	8	0.710227	1.07711	15.7536	15.7107	15.7358	16.5119	15.6223	15.8021	16.455	15.9706
	TWF1_HUMAN	Twinfilin-1 OS=Homo sapiens GN=TWF1 PE=1 SV=3	6	0.710294	0.931689	17.2398	16.4179	17.1068	17.4362	16.9896	17.0721	17.2318	17.2334
	OPA1_HUMAN	Dynamin-like 120 kDa protein, mitochondrial OS=Homo sapiens GN=OPA1 PE=1 SV=3	30	0.710695	1.02235	19.2748	19.3688	19.3747	19.244	19.438	19.3823	19.1717	19.3917
	WDR12_HUMAN	Ribosome biogenesis protein WDR12 OS=Homo sapiens GN=WDR12 PE=1 SV=2	3	0.710853	1.02351	14.1492	14.0671	14.5443	14.8212	15.0209	15.0037	15.8196	15.776
	H2A2B_HUMAN	Histone H2A type 2-B OS=Homo sapiens GN=HIST2H2AB PE=1 SV=3	1	0.710955	0.945635	18.1944	18.5275	18.1633	18.344	18.3366	17.8835	18.1456	17.7623
	RL36L_HUMAN	60S ribosomal protein L36a-like OS=Homo sapiens GN=RPL36AL PE=1 SV=3	1	0.711168	0.882112	14.2811	14.9151	14.4521	14.9662	15.0914	14.3584	15.1537	14.0146
	MTX3_HUMAN	Metaxin-3 OS=Homo sapiens GN=MTX3 PE=1 SV=2	2	0.711557	1.34392	15.4486	13.0351	11.8589	11.9559	13.7341	15.7102	11.8656	13.9117
	ALG12_HUMAN	Dol-P-Man:Man(7)GlcNAc(2)-PP-Dol alpha-1,6-mannosyltransferase OS=Homo sapiens GN=ALG12 PE=1 SV=1	2	0.712272	1.14025	12.9549	14.5192	14.5828	14.2794	14.4721	14.0042	14.7338	14.6982
	RT14_HUMAN	28S ribosomal protein S14, mitochondrial OS=Homo sapiens GN=MRPS14 PE=1 SV=1	2	0.712467	1.07276	16.0915	15.6014	14.9006	15.5819	15.8736	15.8016	15.7395	16.0257
	RFA3_HUMAN	Replication protein A 14 kDa subunit OS=Homo sapiens GN=RPA3 PE=1 SV=1	2	0.712748	1.08552	15.0655	16.0383	16.2641	16.0136	15.7546	15.7756	16.1286	15.8589
	ALG1_HUMAN	Chitobiosyldiphosphodolichol beta-mannosyltransferase OS=Homo sapiens GN=ALG1 PE=1 SV=2	5	0.713162	1.23145	14.6784	16.1963	16.4451	14.7579	15.3196	16.6747	16.0904	16.1061
	SELT_HUMAN	Selenoprotein T OS=Homo sapiens GN=SELT PE=2 SV=2	3	0.713898	0.950279	15.8772	16.1585	16.3883	16.0937	16.438	15.9688	16.4265	16.6147
[truncated: 470 more rows]
