# Supplementary material for: Chaperone-Mediated Autophagy Controls Proteomic and Transcriptomic Pathways to Maintain Glioma Stem Cell Activity
Source: Oxford University Press journal article supplement (doi:10.1158/0008-5472.can-21-2161), 2022-02-07
Supplement: can-21-2161_suppl_table_2_suppst2.xlsx [file can-21-2161_suppl_table_2_suppst2.xlsx]

## Sheet: Proteomics pGK shL2A U251
						Raw data (LFQ intensity)
	T: Accession	T: Description	N: Unique peptides	p value	Sh/Ctrl	pGK-1	shL2A-1	pGK-2	shL2A-2	pGK-3	shL2A-3	pGK-4	shL2A-4
	P20591	MX1_HUMAN Interferon-induced GTP-binding protein Mx1 OS=Homo sapiens OX=9606 GN=MX1 PE=1 SV=4	13	0.000780728	25.0008	11.6236	17.9412	13.8225	18.7876	14.6022	18.6837	14.5182	17.7296
	Q6BDS2	URFB1_HUMAN UHRF1-binding protein 1 OS=Homo sapiens OX=9606 GN=UHRF1BP1 PE=1 SV=1	2	0.0365965	19.6695	15.6205	20.631	13.5189	20.6889	20.8073	20.4257	14.7918	20.1845
	O14879	IFIT3_HUMAN Interferon-induced protein with tetratricopeptide repeats 3 OS=Homo sapiens OX=9606 GN=IFIT3 PE=1 SV=1	7	6.16098e-05	14.5897	14.0138	17.0529	13.2398	18.1036	13.5275	18.0769	13.6951	16.7103
	P09914	IFIT1_HUMAN Interferon-induced protein with tetratricopeptide repeats 1 OS=Homo sapiens OX=9606 GN=IFIT1 PE=1 SV=2	9	0.00261198	9.56596	15.6234	17.2768	13.6126	18.0453	14.2571	18.0308	13.207	16.3789
	P09601	HMOX1_HUMAN Heme oxygenase 1 OS=Homo sapiens OX=9606 GN=HMOX1 PE=1 SV=1	6	3.9365e-05	9.55158	14.6468	17.4469	14.4267	17.4013	14.6376	17.7963	13.4238	17.5134
	P05161	ISG15_HUMAN Ubiquitin-like protein ISG15 OS=Homo sapiens OX=9606 GN=ISG15 PE=1 SV=5	5	0.00280285	7.27839	17.2832	19.8229	16.9455	19.5948	14.9967	19.6716	17.2477	18.8382
	Q8TCU6	PREX1_HUMAN Phosphatidylinositol 3,4,5-trisphosphate-dependent Rac exchanger 1 protein OS=Homo sapiens OX=9606 GN=PREX1 PE=1 SV=3	2	0.00879914	6.0141	14.2699	14.579	13.9624	17.0712	14.0194	17.4805	13.5792	17.0536
	P26232	CTNA2_HUMAN Catenin alpha-2 OS=Homo sapiens OX=9606 GN=CTNNA2 PE=1 SV=5	1	0.0450786	5.92268	14.5054	17.6456	17.9645	17.2766	13.8128	17.5519	13.636	17.7095
	Q99426	TBCB_HUMAN Tubulin-folding cofactor B OS=Homo sapiens OX=9606 GN=TBCB PE=1 SV=2	4	0.0438399	5.20461	14.4147	16.5956	17.5891	17.2609	13.5446	17.8608	14.4657	17.8159
	Q5K651	SAMD9_HUMAN Sterile alpha motif domain-containing protein 9 OS=Homo sapiens OX=9606 GN=SAMD9 PE=1 SV=1	6	0.00124008	5.01163	15.3376	17.414	15.5632	17.5514	13.8559	17.167	14.952	16.8774
	P11233	RALA_HUMAN Ras-related protein Ral-A OS=Homo sapiens OX=9606 GN=RALA PE=1 SV=1	2	0.0106765	4.94538	14.5096	14.2359	13.0327	16.3299	13.2794	16.474	13.3523	16.3586
	O75348	VATG1_HUMAN V-type proton ATPase subunit G 1 OS=Homo sapiens OX=9606 GN=ATP6V1G1 PE=1 SV=3	5	0.0226903	4.72951	16.6913	18.3257	17.3763	18.5307	15.9897	17.9569	14.0084	18.2191		UPREGULATED SIGNIFICANTLY (P<0,05)
	Q8WW12	PCNP_HUMAN PEST proteolytic signal-containing nuclear protein OS=Homo sapiens OX=9606 GN=PCNP PE=1 SV=2	3	0.0386625	4.40808	14.643	17.7904	17.0219	18.2291	14.4795	18.2499	17.6067	18.0422
	Q6NT55	CP4FN_HUMAN Cytochrome P450 4F22 OS=Homo sapiens OX=9606 GN=CYP4F22 PE=1 SV=1	2	0.0236423	3.92181	14.9472	17.4984	14.6267	16.7694	14.0141	14.6337	14.0192	16.5919		DOWNREGULATED SIGNIFICANTLY (P<0,05)
	Q9NQR4	NIT2_HUMAN Omega-amidase NIT2 OS=Homo sapiens OX=9606 GN=NIT2 PE=1 SV=1	5	0.0217701	3.80475	14.7816	16.6226	16.3794	16.6835	14.5607	16.6727	13.3332	16.7874
	Q96PK6	RBM14_HUMAN RNA-binding protein 14 OS=Homo sapiens OX=9606 GN=RBM14 PE=1 SV=2	6	0.0443977	3.77841	14.5577	15.9909	13.4509	14.3434	14.1463	17.1062	14.9601	17.3458		NON-SIGNIFICANT
	Q8N5K1	CISD2_HUMAN CDGSH iron-sulfur domain-containing protein 2 OS=Homo sapiens OX=9606 GN=CISD2 PE=1 SV=1	3	0.0101625	3.71453	16.1763	16.9192	14.1482	16.4147	15.4827	17.0604	14.5149	17.5005
	Q969S3	ZN622_HUMAN Zinc finger protein 622 OS=Homo sapiens OX=9606 GN=ZNF622 PE=1 SV=1	3	0.00436757	3.57668	15.3375	16.11	14.3193	15.8567	13.9681	16.297	13.4191	16.1348
	Q01650	LAT1_HUMAN Large neutral amino acids transporter small subunit 1 OS=Homo sapiens OX=9606 GN=SLC7A5 PE=1 SV=2	2	0.0139341	3.50723	14.7322	17.9027	16.7491	18.0022	15.6433	17.6913	16.994	17.7636
	P08397	HEM3_HUMAN Porphobilinogen deaminase OS=Homo sapiens OX=9606 GN=HMBS PE=1 SV=2	2	0.0366446	3.47119	14.5925	14.2582	13.8061	16.3384	14.8392	16.3269	13.1765	16.6725
	Q9Y6D6	BIG1_HUMAN Brefeldin A-inhibited guanine nucleotide-exchange protein 1 OS=Homo sapiens OX=9606 GN=ARFGEF1 PE=1 SV=2	6	0.0280627	3.44024	14.943	14.6563	13.2043	16.6253	14.7411	15.9643	13.3449	16.1172
	Q92930	RAB8B_HUMAN Ras-related protein Rab-8B OS=Homo sapiens OX=9606 GN=RAB8B PE=1 SV=2	3	0.0345931	3.42034	16.0276	16.6538	13.4908	16.9269	14.4201	16.6604	16.1628	16.9567
	O00330	ODPX_HUMAN Pyruvate dehydrogenase protein X component, mitochondrial OS=Homo sapiens OX=9606 GN=PDHX PE=1 SV=3	3	0.0230065	3.33968	14.1945	16.3077	16.4937	16.851	14.1339	16.8147	15.202	17.0095
	Q9H9Q2	CSN7B_HUMAN COP9 signalosome complex subunit 7b OS=Homo sapiens OX=9606 GN=COPS7B PE=1 SV=1	3	0.0487237	3.32757	13.8714	17.3365	14.3996	16.7067	16.5456	16.8805	16.424	17.2548
	P55196	AFAD_HUMAN Afadin OS=Homo sapiens OX=9606 GN=AFDN PE=1 SV=3	7	0.00181803	3.23232	14.8844	15.5939	13.9427	16.1599	14.4725	15.7701	13.5795	16.1254
	Q15050	RRS1_HUMAN Ribosome biogenesis regulatory protein homolog OS=Homo sapiens OX=9606 GN=RRS1 PE=1 SV=2	5	0.0376834	3.22295	14.0744	16.3054	16.4451	16.0449	14.5866	16.3966	13.6276	16.7402
	O95757	HS74L_HUMAN Heat shock 70 kDa protein 4L OS=Homo sapiens OX=9606 GN=HSPA4L PE=1 SV=3	12	0.0453597	3.06515	13.1489	16.3047	15.3386	16.6236	16.1651	16.4265	14.6889	16.4507
	Q70UQ0	IKIP_HUMAN Inhibitor of nuclear factor kappa-B kinase-interacting protein OS=Homo sapiens OX=9606 GN=IKBIP PE=1 SV=1	3	0.00669592	3.04512	15.5569	16.2154	14.0668	15.827	14.4336	15.9815	13.8373	16.2968
	Q658Y4	F91A1_HUMAN Protein FAM91A1 OS=Homo sapiens OX=9606 GN=FAM91A1 PE=1 SV=3	7	0.0358303	2.99337	12.2241	15.5783	14.2348	15.7388	14.8044	15.0529	14.2727	15.4932
	P60510	PP4C_HUMAN Serine/threonine-protein phosphatase 4 catalytic subunit OS=Homo sapiens OX=9606 GN=PPP4C PE=1 SV=1	2	0.00978476	2.95675	14.54	16.1103	15.6875	16.0557	14.0182	15.8915	13.8865	16.3306
	O14735	CDIPT_HUMAN CDP-diacylglycerol--inositol 3-phosphatidyltransferase OS=Homo sapiens OX=9606 GN=CDIPT PE=1 SV=1	2	0.00113611	2.84473	14.2521	15.9375	13.7097	15.8464	14.7536	15.6851	14.0307	15.3103
	Q9Y5K6	CD2AP_HUMAN CD2-associated protein OS=Homo sapiens OX=9606 GN=CD2AP PE=1 SV=1	7	0.0205599	2.77581	14.3473	15.8398	15.6399	15.6245	14.3283	15.9808	13.4157	16.1777
	P84095	RHOG_HUMAN Rho-related GTP-binding protein RhoG OS=Homo sapiens OX=9606 GN=RHOG PE=1 SV=1	4	0.0059432	2.77024	14.981	17.3912	15.5035	17.3668	16.5889	16.9999	15.9401	17.1357
	P08559	ODPA_HUMAN Pyruvate dehydrogenase E1 component subunit alpha, somatic form, mitochondrial OS=Homo sapiens OX=9606 GN=PDHA1 PE=1 SV=3	10	0.00174385	2.64656	17.5538	18.3519	17.2425	19.1509	17.2765	18.4326	16.6776	18.4313
	P46934	NEDD4_HUMAN E3 ubiquitin-protein ligase NEDD4 OS=Homo sapiens OX=9606 GN=NEDD4 PE=1 SV=4	5	0.0180888	2.64085	14.34	16.7059	15.3685	16.8003	14.7811	16.5167	16.3025	16.3731
	Q15382	RHEB_HUMAN GTP-binding protein Rheb OS=Homo sapiens OX=9606 GN=RHEB PE=1 SV=1	2	0.0477694	2.62832	15.5244	18.0531	16.5666	17.6923	15.4384	17.3508	17.7584	17.7682
	Q9UL26	RB22A_HUMAN Ras-related protein Rab-22A OS=Homo sapiens OX=9606 GN=RAB22A PE=1 SV=2	3	0.0372649	2.55036	13.8682	16.6261	15.075	14.577	14.1912	15.9464	14.6386	16.0262
	Q8TBA6	GOGA5_HUMAN Golgin subfamily A member 5 OS=Homo sapiens OX=9606 GN=GOLGA5 PE=1 SV=3	2	0.0358014	2.54962	13.5688	15.0597	15.2562	15.0992	14.1333	15.8192	13.0772	15.4586
	P46734	MP2K3_HUMAN Dual specificity mitogen-activated protein kinase kinase 3 OS=Homo sapiens OX=9606 GN=MAP2K3 PE=1 SV=2	6	0.00382217	2.48826	15.1443	16.2749	15.1821	16.8035	14.4573	15.9335	15.5034	16.5358
	Q9BT22	ALG1_HUMAN Chitobiosyldiphosphodolichol beta-mannosyltransferase OS=Homo sapiens OX=9606 GN=ALG1 PE=1 SV=2	2	0.0286919	2.43344	14.5085	16.2619	16.1418	16.0411	14.9889	16.3521	14.088	16.204
	Q9BSJ8	ESYT1_HUMAN Extended synaptotagmin-1 OS=Homo sapiens OX=9606 GN=ESYT1 PE=1 SV=1	13	0.00396543	2.24887	16.5813	17.2532	15.3765	17.1804	15.8909	17.043	16.1831	17.2319
	O75822	EIF3J_HUMAN Eukaryotic translation initiation factor 3 subunit J OS=Homo sapiens OX=9606 GN=EIF3J PE=1 SV=2	6	0.0255164	2.22836	17.2919	18.7119	18.1459	18.4105	16.3919	18.7356	17.7799	18.3755
	P04637	P53_HUMAN Cellular tumor antigen p53 OS=Homo sapiens OX=9606 GN=TP53 PE=1 SV=4	2	0.0490196	2.20283	13.9793	15.4611	14.1308	15.1173	15.4692	16.4324	14.9794	16.1054
	P00414	COX3_HUMAN Cytochrome c oxidase subunit 3 OS=Homo sapiens OX=9606 GN=MT-CO3 PE=1 SV=2	2	0.0353883	2.19194	14.6519	15.8355	15.9614	16.9656	14.5937	16.4345	15.4524	15.9527
	P42566	EPS15_HUMAN Epidermal growth factor receptor substrate 15 OS=Homo sapiens OX=9606 GN=EPS15 PE=1 SV=2	5	0.0419798	2.14502	15.5971	16.6575	15.7832	15.8565	14.0436	16.0725	14.9647	16.2062
	Q9NX08	COMD8_HUMAN COMM domain-containing protein 8 OS=Homo sapiens OX=9606 GN=COMMD8 PE=1 SV=1	3	0.0449687	2.11118	15.3931	15.7229	15.7707	16.2535	14.9804	16.1208	13.8804	16.2395
	P42224	STAT1_HUMAN Signal transducer and activator of transcription 1-alpha/beta OS=Homo sapiens OX=9606 GN=STAT1 PE=1 SV=2	18	0.000152156	2.08646	17.2111	18.3374	17.4779	18.4817	17.092	18.5196	17.5046	18.191
	Q96EK5	KBP_HUMAN KIF-binding protein OS=Homo sapiens OX=9606 GN=KIFBP PE=1 SV=1	9	0.0299351	2.07648	14.1728	14.4186	14.5184	15.4091	14.5356	15.4936	13.4317	15.5538
	O43432	IF4G3_HUMAN Eukaryotic translation initiation factor 4 gamma 3 OS=Homo sapiens OX=9606 GN=EIF4G3 PE=1 SV=2	4	0.0452522	2.06282	15.5226	16.0468	13.7147	15.4668	14.7265	15.3095	14.2598	15.579
	Q9BRP1	PDD2L_HUMAN Programmed cell death protein 2-like OS=Homo sapiens OX=9606 GN=PDCD2L PE=1 SV=1	2	0.0123481	2.0554	15.0216	15.747	13.7942	15.2808	14.0979	15.3403	14.6392	15.3426
	Q9Y3U8	RL36_HUMAN 60S ribosomal protein L36 OS=Homo sapiens OX=9606 GN=RPL36 PE=1 SV=3	2	0.0485669	2.04721	17.3361	18.0246	18.3517	18.1562	16.5192	18.5214	16.832	18.4715
	Q04837	SSBP_HUMAN Single-stranded DNA-binding protein, mitochondrial OS=Homo sapiens OX=9606 GN=SSBP1 PE=1 SV=1	4	0.039689	2.02628	16.6561	18.5753	18.1402	18.7764	17.2836	18.7699	18.1675	18.2011
	Q9UJA5	TRM6_HUMAN tRNA (adenine(58)-N(1))-methyltransferase non-catalytic subunit TRM6 OS=Homo sapiens OX=9606 GN=TRMT6 PE=1 SV=1	5	0.00156625	2.00411	15.3928	16.507	15.6061	16.6361	15.2072	16.4964	16.0431	16.6216
	Q9P0J7	KCMF1_HUMAN E3 ubiquitin-protein ligase KCMF1 OS=Homo sapiens OX=9606 GN=KCMF1 PE=1 SV=2	3	0.0471976	2.00295	14.3102	13.817	13.6444	15.0416	13.6865	15.4596	13.9628	15.2942
	Q9C0E2	XPO4_HUMAN Exportin-4 OS=Homo sapiens OX=9606 GN=XPO4 PE=1 SV=2	3	0.0269135	1.99398	14.3644	15.4626	15.5714	15.9275	14.1754	16.0058	15.0295	15.7272
	O60427	FADS1_HUMAN Acyl-CoA (8-3)-desaturase OS=Homo sapiens OX=9606 GN=FADS1 PE=1 SV=3	2	0.0428983	1.97505	12.9144	14.4146	12.4749	13.6198	13.9882	14.1147	12.6349	13.791
	P68366	TBA4A_HUMAN Tubulin alpha-4A chain OS=Homo sapiens OX=9606 GN=TUBA4A PE=1 SV=1	1	0.0471487	1.96525	13.757	16.0969	15.3717	15.8195	15.0968	15.5017	14.6376	15.3438
	Q13428	TCOF_HUMAN Treacle protein OS=Homo sapiens OX=9606 GN=TCOF1 PE=1 SV=3	11	0.0382701	1.91944	16.8068	17.3736	16.9932	17.6711	17.3593	17.9391	15.7903	17.7286
	P28070	PSB4_HUMAN Proteasome subunit beta type-4 OS=Homo sapiens OX=9606 GN=PSMB4 PE=1 SV=4	5	0.00696787	1.8995	16.5956	18.2287	17.6125	18.1346	17.2549	17.9645	17.0076	17.8451
	O15127	SCAM2_HUMAN Secretory carrier-associated membrane protein 2 OS=Homo sapiens OX=9606 GN=SCAMP2 PE=1 SV=2	2	0.00802971	1.87726	17.0282	17.8459	17.016	17.7243	16.2836	17.2	16.5766	17.7687
	Q9UBE0	SAE1_HUMAN SUMO-activating enzyme subunit 1 OS=Homo sapiens OX=9606 GN=SAE1 PE=1 SV=1	6	0.0440941	1.84996	17.3914	17.5844	16.9574	17.8151	16.4223	17.4644	15.8539	17.3111
	P31483	TIA1_HUMAN Nucleolysin TIA-1 isoform p40 OS=Homo sapiens OX=9606 GN=TIA1 PE=1 SV=3	2	0.0266342	1.83736	14.8629	15.1392	14.3718	14.9786	14.4682	15.3693	13.4911	15.2175
	P62316	SMD2_HUMAN Small nuclear ribonucleoprotein Sm D2 OS=Homo sapiens OX=9606 GN=SNRPD2 PE=1 SV=1	4	0.0479513	1.83274	17.2167	18.8661	18.874	18.9242	18.2771	19.2265	18.0651	18.912
	O95470	SGPL1_HUMAN Sphingosine-1-phosphate lyase 1 OS=Homo sapiens OX=9606 GN=SGPL1 PE=1 SV=3	3	0.0443476	1.83229	15.5868	16.2496	16.2134	16.379	15.6232	16.4447	14.5666	16.4114
	P49721	PSB2_HUMAN Proteasome subunit beta type-2 OS=Homo sapiens OX=9606 GN=PSMB2 PE=1 SV=1	6	0.0187133	1.8289	16.7524	17.6794	16.3372	17.6344	16.7681	17.2797	17.3676	18.1157
	P11021	BIP_HUMAN Endoplasmic reticulum chaperone BiP OS=Homo sapiens OX=9606 GN=HSPA5 PE=1 SV=2	30	0.00020084	1.82571	22.2514	23.2056	22.6422	23.2511	22.2298	23.2001	22.4631	23.4035
	Q15738	NSDHL_HUMAN Sterol-4-alpha-carboxylate 3-dehydrogenase, decarboxylating OS=Homo sapiens OX=9606 GN=NSDHL PE=1 SV=2	7	0.00195528	1.82372	15.8521	16.5038	16.0856	17.167	16.1475	16.8226	16.0558	17.115
	Q03519	TAP2_HUMAN Antigen peptide transporter 2 OS=Homo sapiens OX=9606 GN=TAP2 PE=1 SV=1	3	0.0120179	1.80349	15.0616	16.3851	16.0407	16.6964	15.7808	16.4625	15.9744	16.7167
	P07099	HYEP_HUMAN Epoxide hydrolase 1 OS=Homo sapiens OX=9606 GN=EPHX1 PE=1 SV=1	11	0.0179098	1.79114	17.7144	19.1071	18.4466	18.8542	17.8745	19.2321	18.7758	18.9816
	Q8IXS6	PALM2_HUMAN Paralemmin-2 OS=Homo sapiens OX=9606 GN=PALM2 PE=1 SV=3	3	0.0113697	1.7868	15.1155	15.269	14.5657	15.6526	14.3235	15.466	14.1861	15.1527
	Q6PIU2	NCEH1_HUMAN Neutral cholesterol ester hydrolase 1 OS=Homo sapiens OX=9606 GN=NCEH1 PE=1 SV=3	9	0.0321344	1.76269	16.9803	17.7695	18.0268	18.185	17.0089	18.3051	17.5074	18.5349
	Q99598	TSNAX_HUMAN Translin-associated protein X OS=Homo sapiens OX=9606 GN=TSNAX PE=1 SV=1	5	0.0318317	1.75694	15.5005	17.2238	16.4242	17.0175	15.8982	16.8601	16.6971	16.6708
	P39019	RS19_HUMAN 40S ribosomal protein S19 OS=Homo sapiens OX=9606 GN=RPS19 PE=1 SV=2	7	0.0293697	1.74741	17.9459	19.1012	19.0435	19.239	17.843	19.1032	18.5664	19.1764
	Q14739	LBR_HUMAN Delta(14)-sterol reductase LBR OS=Homo sapiens OX=9606 GN=LBR PE=1 SV=2	3	0.0323586	1.73787	15.836	16.6715	16.6782	17.6979	16.1432	16.8253	16.3597	17.0118
	P55036	PSMD4_HUMAN 26S proteasome non-ATPase regulatory subunit 4 OS=Homo sapiens OX=9606 GN=PSMD4 PE=1 SV=1	2	0.0113624	1.71274	17.261	18.1998	17.608	17.9827	17.1638	17.8155	16.6648	17.8049
	O60934	NBN_HUMAN Nibrin OS=Homo sapiens OX=9606 GN=NBN PE=1 SV=1	2	0.0116576	1.70028	14.6166	14.8911	13.6407	15.1214	14.3314	14.8418	14.1934	14.9909
	Q9H4L5	OSBL3_HUMAN Oxysterol-binding protein-related protein 3 OS=Homo sapiens OX=9606 GN=OSBPL3 PE=1 SV=1	5	0.0423389	1.69863	15.5303	16.1168	14.9064	16.3847	16.1818	16.1586	15.0408	16.0567
	Q01518	CAP1_HUMAN Adenylyl cyclase-associated protein 1 OS=Homo sapiens OX=9606 GN=CAP1 PE=1 SV=5	15	0.0493321	1.68093	18.759	20.0781	19.9332	20.1196	19.4365	20.4383	19.9955	20.4852
	Q9NQG5	RPR1B_HUMAN Regulation of nuclear pre-mRNA domain-containing protein 1B OS=Homo sapiens OX=9606 GN=RPRD1B PE=1 SV=1	1	0.0334103	1.6788	16.5391	17.3925	16.0883	17.1182	15.6984	16.701	16.6395	16.7433
	Q96I99	SUCB2_HUMAN Succinate--CoA ligase [GDP-forming] subunit beta, mitochondrial OS=Homo sapiens OX=9606 GN=SUCLG2 PE=1 SV=2	7	0.0223003	1.65971	15.7208	16.9384	16.6446	17.0201	16.1086	17.1195	16.7224	17.0422
	P23381	SYWC_HUMAN Tryptophan--tRNA ligase, cytoplasmic OS=Homo sapiens OX=9606 GN=WARS1 PE=1 SV=2	11	0.00909013	1.62319	17.1837	17.8943	17.2718	17.6817	16.5434	17.8118	17.2849	17.6914
	Q07020	RL18_HUMAN 60S ribosomal protein L18 OS=Homo sapiens OX=9606 GN=RPL18 PE=1 SV=2	6	0.0409411	1.61973	18.9564	20.2995	20.1616	20.284	19.3686	20.2906	19.8817	20.2772
	Q13617	CUL2_HUMAN Cullin-2 OS=Homo sapiens OX=9606 GN=CUL2 PE=1 SV=2	6	0.0111455	1.6146	15.6535	16.2394	15.6731	16.4698	15.9695	16.1981	15.101	16.2547
	O00303	EIF3F_HUMAN Eukaryotic translation initiation factor 3 subunit F OS=Homo sapiens OX=9606 GN=EIF3F PE=1 SV=1	8	0.0297886	1.61429	17.436	18.6841	18.1011	18.4122	17.3679	18.4003	18.3012	18.4731
	Q9H9H4	VP37B_HUMAN Vacuolar protein sorting-associated protein 37B OS=Homo sapiens OX=9606 GN=VPS37B PE=1 SV=1	3	0.0190638	1.60822	14.6441	14.4882	14.1448	15.1206	13.9865	14.9969	13.9028	14.8145
	P51148	RAB5C_HUMAN Ras-related protein Rab-5C OS=Homo sapiens OX=9606 GN=RAB5C PE=1 SV=2	5	0.0128458	1.59636	18.1157	19.1264	18.8006	19.0978	18.4858	19.3582	18.892	19.4109
	O15173	PGRC2_HUMAN Membrane-associated progesterone receptor component 2 OS=Homo sapiens OX=9606 GN=PGRMC2 PE=1 SV=1	3	0.029742	1.5935	17.2595	18.6733	18.358	18.4012	17.8813	18.3457	17.7733	18.5407
	Q9P0L0	VAPA_HUMAN Vesicle-associated membrane protein-associated protein A OS=Homo sapiens OX=9606 GN=VAPA PE=1 SV=3	9	0.043413	1.58568	18.6427	19.4611	19.4794	19.4497	18.3855	19.7183	19.184	19.7228
	O75396	SC22B_HUMAN Vesicle-trafficking protein SEC22b OS=Homo sapiens OX=9606 GN=SEC22B PE=1 SV=4	7	0.00291447	1.58452	20.3026	21.2323	20.5746	21.0462	20.228	20.9902	20.7518	21.2445
	O00567	NOP56_HUMAN Nucleolar protein 56 OS=Homo sapiens OX=9606 GN=NOP56 PE=1 SV=4	14	0.019965	1.58094	17.3178	17.7058	17.7409	17.8752	17.1446	17.9909	16.81	18.0845
	P27816	MAP4_HUMAN Microtubule-associated protein 4 OS=Homo sapiens OX=9606 GN=MAP4 PE=1 SV=3	24	0.04782	1.57259	18.8196	19.6253	19.7157	19.7425	18.5717	19.7293	19.3135	19.9359
	P17174	AATC_HUMAN Aspartate aminotransferase, cytoplasmic OS=Homo sapiens OX=9606 GN=GOT1 PE=1 SV=3	9	0.0142557	1.56759	17.4591	18.0891	18.11	18.2946	17.3355	18.3997	17.741	18.4563
	Q9Y262	EIF3L_HUMAN Eukaryotic translation initiation factor 3 subunit L OS=Homo sapiens OX=9606 GN=EIF3L PE=1 SV=1	15	0.00193037	1.56493	17.5465	18.2791	17.9645	18.2725	17.383	18.3068	17.6768	18.2968
	P09211	GSTP1_HUMAN Glutathione S-transferase P OS=Homo sapiens OX=9606 GN=GSTP1 PE=1 SV=2	12	0.027491	1.56204	20.0397	20.9073	20.882	20.9716	20.0563	21.2367	20.6256	21.0616
	Q07866	KLC1_HUMAN Kinesin light chain 1 OS=Homo sapiens OX=9606 GN=KLC1 PE=1 SV=2	8	0.044542	1.56071	16.5911	17.2981	17.4037	17.4983	16.3608	17.7037	17.1265	17.5507
	P08195	4F2_HUMAN 4F2 cell-surface antigen heavy chain OS=Homo sapiens OX=9606 GN=SLC3A2 PE=1 SV=3	9	0.00315566	1.55707	18.4175	19.2467	18.6414	19.0945	18.3561	19.2621	18.9181	19.285
	A0FGR8	ESYT2_HUMAN Extended synaptotagmin-2 OS=Homo sapiens OX=9606 GN=ESYT2 PE=1 SV=1	16	0.019887	1.55396	16.8523	17.7909	17.2588	17.569	16.6416	17.1655	16.5966	17.3679
	P41250	GARS_HUMAN Glycine--tRNA ligase OS=Homo sapiens OX=9606 GN=GARS1 PE=1 SV=3	19	0.000865028	1.55339	18.3736	18.9621	17.9909	18.9308	18.1665	18.7659	18.3021	18.716
	Q8NCN5	PDPR_HUMAN Pyruvate dehydrogenase phosphatase regulatory subunit, mitochondrial OS=Homo sapiens OX=9606 GN=PDPR PE=1 SV=2	11	0.0092809	1.54935	15.7496	16.5418	16.1586	16.5497	16.0828	16.3209	15.4834	16.5887
	P27635	RL10_HUMAN 60S ribosomal protein L10 OS=Homo sapiens OX=9606 GN=RPL10 PE=1 SV=4	7	0.00593431	1.53796	19.1122	19.5986	19.279	19.7448	18.6409	19.4927	18.8753	19.5554
	P07437	TBB5_HUMAN Tubulin beta chain OS=Homo sapiens OX=9606 GN=TUBB PE=1 SV=2	4	0.0220526	1.53328	22.2536	22.733	22.6178	22.8423	22.5032	23.5659	22.3703	23.0703
	Q9Y6M1	IF2B2_HUMAN Insulin-like growth factor 2 mRNA-binding protein 2 OS=Homo sapiens OX=9606 GN=IGF2BP2 PE=1 SV=2	8	0.0311215	1.52916	17.0701	17.5046	17.0714	17.4387	16.1993	17.4194	17.0689	17.4979
	O00743	PPP6_HUMAN Serine/threonine-protein phosphatase 6 catalytic subunit OS=Homo sapiens OX=9606 GN=PPP6C PE=1 SV=1	5	0.0393922	1.52889	16.4609	16.9863	17.1295	17.1507	16.0515	17.1051	16.3083	17.1581
	P30519	HMOX2_HUMAN Heme oxygenase 2 OS=Homo sapiens OX=9606 GN=HMOX2 PE=1 SV=2	2	0.0366235	1.51989	14.7253	15.4374	15.1343	15.4798	15.1704	15.3207	14.2147	15.4226
	Q14914	PTGR1_HUMAN Prostaglandin reductase 1 OS=Homo sapiens OX=9606 GN=PTGR1 PE=1 SV=2	6	0.0208214	1.50899	17.5829	18.4414	17.8829	18.2395	17.3787	17.7984	17.2898	18.0293
	P61313	RL15_HUMAN 60S ribosomal protein L15 OS=Homo sapiens OX=9606 GN=RPL15 PE=1 SV=2	9	0.00569862	1.50737	18.9602	19.6119	19.364	20.0757	19.1188	19.7711	19.2415	19.5939
	P06753	TPM3_HUMAN Tropomyosin alpha-3 chain OS=Homo sapiens OX=9606 GN=TPM3 PE=1 SV=2	5	0.0334164	1.50323	17.9545	18.6995	18.399	19.1406	18.8219	18.861	18.3879	19.2145
	Q16539	MK14_HUMAN Mitogen-activated protein kinase 14 OS=Homo sapiens OX=9606 GN=MAPK14 PE=1 SV=3	5	0.0175033	1.49634	16.3451	16.9593	16.4778	16.9387	15.8222	16.6647	16.1144	16.5226
	Q9NR30	DDX21_HUMAN Nucleolar RNA helicase 2 OS=Homo sapiens OX=9606 GN=DDX21 PE=1 SV=5	12	0.0174277	1.48796	17.7633	18.6713	18.3686	18.6743	17.944	18.7066	18.4966	18.8136
	Q92973	TNPO1_HUMAN Transportin-1 OS=Homo sapiens OX=9606 GN=TNPO1 PE=1 SV=2	17	0.00710003	1.48689	19.015	19.4329	19.4151	19.8602	18.9251	19.6178	19.021	19.7545
	Q9Y512	SAM50_HUMAN Sorting and assembly machinery component 50 homolog OS=Homo sapiens OX=9606 GN=SAMM50 PE=1 SV=3	7	0.0315951	1.48677	16.6555	17.4396	16.5564	17.4291	16.8483	16.9382	16.2626	16.8046
	P12236	ADT3_HUMAN ADP/ATP translocase 3 OS=Homo sapiens OX=9606 GN=SLC25A6 PE=1 SV=4	3	0.010962	1.47015	20.7289	21.2659	21.1142	21.4076	21.1777	21.6723	20.7791	21.678
	Q15631	TSN_HUMAN Translin OS=Homo sapiens OX=9606 GN=TSN PE=1 SV=1	6	0.00220166	1.46333	17.7484	18.6067	17.9896	18.2976	17.718	18.2002	17.7656	18.3142
	Q16658	FSCN1_HUMAN Fascin OS=Homo sapiens OX=9606 GN=FSCN1 PE=1 SV=3	10	0.0428134	1.45195	16.9279	17.7471	16.8307	17.6863	17.605	17.2828	16.9273	17.7265
	O75663	TIPRL_HUMAN TIP41-like protein OS=Homo sapiens OX=9606 GN=TIPRL PE=1 SV=2	6	0.0341476	1.4387	17.0807	18.0608	16.9672	17.5549	17.4349	17.2954	16.9958	17.6666
	P50454	SERPH_HUMAN Serpin H1 OS=Homo sapiens OX=9606 GN=SERPINH1 PE=1 SV=2	11	0.0288323	1.42838	18.3099	18.9901	18.4334	19.1835	18.0956	18.7379	18.8024	18.7873
	P12814	ACTN1_HUMAN Alpha-actinin-1 OS=Homo sapiens OX=9606 GN=ACTN1 PE=1 SV=2	29	0.000231948	1.42807	20.1854	20.7062	20.3968	20.8206	20.1451	20.7907	20.2069	20.673
	P68371	TBB4B_HUMAN Tubulin beta-4B chain OS=Homo sapiens OX=9606 GN=TUBB4B PE=1 SV=1	1	0.00502169	1.41626	22.867	23.5114	23.2723	23.3955	22.7834	23.5123	23.0735	23.5854
	P20340	RAB6A_HUMAN Ras-related protein Rab-6A OS=Homo sapiens OX=9606 GN=RAB6A PE=1 SV=3;sp	4	0.0421968	1.41345	16.7717	17.8794	16.857	17.4567	17.234	17.3617	17.4414	17.6031
	P29317	EPHA2_HUMAN Ephrin type-A receptor 2 OS=Homo sapiens OX=9606 GN=EPHA2 PE=1 SV=2	14	0.00162375	1.4125	18.3051	19.0196	18.5302	18.7784	18.5327	18.8422	18.2644	18.9852
	Q96M27	PRRC1_HUMAN Protein PRRC1 OS=Homo sapiens OX=9606 GN=PRRC1 PE=1 SV=1	4	0.000839769	1.4124	16.5995	16.8912	16.43	17.0594	16.5719	16.8912	16.361	17.1133
	P53618	COPB_HUMAN Coatomer subunit beta OS=Homo sapiens OX=9606 GN=COPB1 PE=1 SV=3	22	0.0149792	1.40645	17.9641	18.8815	18.5936	18.8422	18.2377	18.7596	18.5173	18.7977
	Q08211	DHX9_HUMAN ATP-dependent RNA helicase A OS=Homo sapiens OX=9606 GN=DHX9 PE=1 SV=4	33	0.0294137	1.40531	18.3892	19.2331	19.1947	19.2595	18.665	19.1755	18.8194	19.3638
	P51659	DHB4_HUMAN Peroxisomal multifunctional enzyme type 2 OS=Homo sapiens OX=9606 GN=HSD17B4 PE=1 SV=3	11	0.0412098	1.40173	17.5534	18.0129	17.7881	18.0851	17.1482	18.1719	18.0086	18.1772
	P13489	RINI_HUMAN Ribonuclease inhibitor OS=Homo sapiens OX=9606 GN=RNH1 PE=1 SV=2	13	0.040708	1.39974	17.4965	18.7187	17.9985	18.3774	18.209	18.3876	18.1731	18.334
	P26038	MOES_HUMAN Moesin OS=Homo sapiens OX=9606 GN=MSN PE=1 SV=3	25	0.0262894	1.38656	20.5284	21.4192	21.1319	21.3231	20.7463	21.29	21.1813	21.4419
	Q99961	SH3G1_HUMAN Endophilin-A2 OS=Homo sapiens OX=9606 GN=SH3GL1 PE=1 SV=1	6	0.0267547	1.37071	16.9591	17.5231	17.4775	17.4564	16.7576	17.6054	17.1372	17.5662
	Q96S52	PIGS_HUMAN GPI transamidase component PIG-S OS=Homo sapiens OX=9606 GN=PIGS PE=1 SV=3	6	0.0474198	1.3688	16.1936	16.5363	16.6196	16.6625	15.7783	16.8164	16.2794	16.6675
	O60664	PLIN3_HUMAN Perilipin-3 OS=Homo sapiens OX=9606 GN=PLIN3 PE=1 SV=3	12	0.00351374	1.3681	18.9302	19.2969	19.079	19.5032	18.6878	19.2684	18.867	19.3041
	Q9BZE4	NOG1_HUMAN Nucleolar GTP-binding protein 1 OS=Homo sapiens OX=9606 GN=GTPBP4 PE=1 SV=3	7	0.0186535	1.3563	16.4399	16.6357	16.2831	16.562	15.8104	16.5574	16.1491	16.6861
	P05455	LA_HUMAN Lupus La protein OS=Homo sapiens OX=9606 GN=SSB PE=1 SV=2	18	0.00172894	1.34175	18.9287	19.5468	19.0368	19.2893	18.9577	19.3418	19.1079	19.5497
	P09651	ROA1_HUMAN Heterogeneous nuclear ribonucleoprotein A1 OS=Homo sapiens OX=9606 GN=HNRNPA1 PE=1 SV=5;sp	14	0.0353199	1.34065	20.6982	21.4082	20.9896	21.4795	20.8464	21.413	21.4111	21.3363
	P48060	GLIP1_HUMAN Glioma pathogenesis-related protein 1 OS=Homo sapiens OX=9606 GN=GLIPR1 PE=1 SV=3	2	0.0354536	1.33905	14.2224	14.671	14.2309	14.7257	14.2933	14.2216	14.1359	14.9491
	P63104	1433Z_HUMAN 14-3-3 protein zeta/delta OS=Homo sapiens OX=9606 GN=YWHAZ PE=1 SV=1	12	0.0101457	1.33771	21.5163	22.1465	21.8056	22.2025	21.6487	22.0044	21.9728	22.2691
	Q02978	M2OM_HUMAN Mitochondrial 2-oxoglutarate/malate carrier protein OS=Homo sapiens OX=9606 GN=SLC25A11 PE=1 SV=3	5	0.01293	1.33597	19.6424	20.1301	19.8437	20.1101	19.4002	20.1153	19.9396	20.1422
	P23246	SFPQ_HUMAN Splicing factor, proline- and glutamine-rich OS=Homo sapiens OX=9606 GN=SFPQ PE=1 SV=2	18	0.0448374	1.33511	20.664	21.0463	20.7141	21.0992	20.1877	21.1165	20.9423	20.9139
	P55265	DSRAD_HUMAN Double-stranded RNA-specific adenosine deaminase OS=Homo sapiens OX=9606 GN=ADAR PE=1 SV=4	10	0.0142305	1.33489	17.0105	17.7261	17.4051	17.7225	17.0616	17.5302	17.2134	17.3786
	Q9Y3C1	NOP16_HUMAN Nucleolar protein 16 OS=Homo sapiens OX=9606 GN=NOP16 PE=1 SV=2	3	0.0443282	1.33374	16.2172	16.3001	16.058	16.3627	15.7449	16.4856	16.274	16.8075
	P21980	TGM2_HUMAN Protein-glutamine gamma-glutamyltransferase 2 OS=Homo sapiens OX=9606 GN=TGM2 PE=1 SV=2	7	0.0194505	1.33102	16.8347	16.9786	16.6519	17.0263	16.5451	16.8374	16.2766	17.1161
	P62826	RAN_HUMAN GTP-binding nuclear protein Ran OS=Homo sapiens OX=9606 GN=RAN PE=1 SV=3	9	0.0374559	1.32036	19.208	20.1766	19.3699	19.7038	19.5641	19.6876	19.6484	19.8262
	P63241	IF5A1_HUMAN Eukaryotic translation initiation factor 5A-1 OS=Homo sapiens OX=9606 GN=EIF5A PE=1 SV=2;sp	5	0.0196906	1.31999	21.0974	21.3652	21.32	21.6591	21.151	21.5024	20.7911	21.4348
	Q13867	BLMH_HUMAN Bleomycin hydrolase OS=Homo sapiens OX=9606 GN=BLMH PE=1 SV=1	11	0.048405	1.30951	17.8628	18.2466	18.3602	18.2859	17.6451	18.4409	17.9729	18.4237
	Q96HE7	ERO1A_HUMAN ERO1-like protein alpha OS=Homo sapiens OX=9606 GN=ERO1A PE=1 SV=2	10	0.0329959	1.30854	17.9772	18.5023	17.7779	18.4037	18.2797	18.1993	17.7554	18.2367
	P67936	TPM4_HUMAN Tropomyosin alpha-4 chain OS=Homo sapiens OX=9606 GN=TPM4 PE=1 SV=3	6	0.0270334	1.30719	20.5811	20.962	21.0464	21.3044	20.7635	21.1129	20.8081	21.3658
	P16615	AT2A2_HUMAN Sarcoplasmic/endoplasmic reticulum calcium ATPase 2 OS=Homo sapiens OX=9606 GN=ATP2A2 PE=1 SV=1	17	0.0073697	1.30392	17.7738	18.1333	17.7364	18.1589	17.8416	17.9058	17.5182	18.2034
	Q86WB0	NIPA_HUMAN Nuclear-interacting partner of ALK OS=Homo sapiens OX=9606 GN=ZC3HC1 PE=1 SV=1	4	0.0319308	1.29823	17.2973	17.6149	17.0042	17.5687	16.8646	17.434	17.424	17.4786
	Q15042	RB3GP_HUMAN Rab3 GTPase-activating protein catalytic subunit OS=Homo sapiens OX=9606 GN=RAB3GAP1 PE=1 SV=3	14	0.0176677	1.29778	15.2856	15.8194	15.4037	15.8143	15.6812	15.8053	15.1911	15.6267
	Q9HAV7	GRPE1_HUMAN GrpE protein homolog 1, mitochondrial OS=Homo sapiens OX=9606 GN=GRPEL1 PE=1 SV=2	5	0.011024	1.29424	17.2621	17.7937	17.7148	17.8514	17.4098	17.952	17.5522	17.8303
	P61158	ARP3_HUMAN Actin-related protein 3 OS=Homo sapiens OX=9606 GN=ACTR3 PE=1 SV=3	14	0.0359377	1.28648	19.4262	19.9532	19.9049	20.1901	19.5085	19.937	19.5665	19.7795
	P11940	PABP1_HUMAN Polyadenylate-binding protein 1 OS=Homo sapiens OX=9606 GN=PABPC1 PE=1 SV=2;sp	15	0.0213639	1.27923	19.076	19.2689	19.3087	19.4835	18.8782	19.33	18.9007	19.5023
	P11142	HSP7C_HUMAN Heat shock cognate 71 kDa protein OS=Homo sapiens OX=9606 GN=HSPA8 PE=1 SV=1	23	0.00117715	1.27669	21.9276	22.3079	21.9787	22.4359	21.8589	22.2286	22.0409	22.2432
	P26639	SYTC_HUMAN Threonine--tRNA ligase 1, cytoplasmic OS=Homo sapiens OX=9606 GN=TARS1 PE=1 SV=3	20	0.037956	1.27065	17.6153	17.9096	17.4654	17.7398	17.2355	17.5368	17.1594	17.6716
	P18621	RL17_HUMAN 60S ribosomal protein L17 OS=Homo sapiens OX=9606 GN=RPL17 PE=1 SV=3	5	0.0240143	1.26778	20.9504	21.1847	20.6769	21.0917	20.4827	21.0823	20.9177	21.0383
	P40261	NNMT_HUMAN Nicotinamide N-methyltransferase OS=Homo sapiens OX=9606 GN=NNMT PE=1 SV=1	6	0.0425618	1.26473	17.4916	18.1812	18.0366	18.3184	17.8429	18.1203	17.9438	18.0503
	Q14257	RCN2_HUMAN Reticulocalbin-2 OS=Homo sapiens OX=9606 GN=RCN2 PE=1 SV=1	10	0.037518	1.26404	18.4278	18.6815	18.5694	18.8768	18.2566	18.7595	18.7384	19.0265
	P78371	TCPB_HUMAN T-complex protein 1 subunit beta OS=Homo sapiens OX=9606 GN=CCT2 PE=1 SV=4	28	0.0155848	1.26113	20.4173	20.9833	20.7724	21.0493	20.6163	21.0259	20.8631	20.9494
	P0DMV9	HS71B_HUMAN Heat shock 70 kDa protein 1B OS=Homo sapiens OX=9606 GN=HSPA1B PE=1 SV=1;sp	12	0.00312586	1.26028	19.6155	19.9512	19.7774	19.9496	19.5073	20.1015	19.7015	19.9343
	Q04637	IF4G1_HUMAN Eukaryotic translation initiation factor 4 gamma 1 OS=Homo sapiens OX=9606 GN=EIF4G1 PE=1 SV=4	32	0.0378286	1.25859	18.5005	19.184	18.8078	19.0817	18.9449	19.0857	19.0359	19.265
	P11413	G6PD_HUMAN Glucose-6-phosphate 1-dehydrogenase OS=Homo sapiens OX=9606 GN=G6PD PE=1 SV=4	23	0.0282059	1.25792	19.7623	20.2978	19.8176	20.0563	19.525	20.0454	19.9815	20.011
	P53396	ACLY_HUMAN ATP-citrate synthase OS=Homo sapiens OX=9606 GN=ACLY PE=1 SV=3	31	0.0329428	1.25042	18.8847	19.4778	19.4057	19.4149	19.0036	19.3502	19.152	19.4927
	P43490	NAMPT_HUMAN Nicotinamide phosphoribosyltransferase OS=Homo sapiens OX=9606 GN=NAMPT PE=1 SV=1	15	0.00222582	1.24698	18.5222	18.8902	18.3638	18.805	18.6504	18.7931	18.5101	18.8319
	P26641	EF1G_HUMAN Elongation factor 1-gamma OS=Homo sapiens OX=9606 GN=EEF1G PE=1 SV=3	20	0.0171795	1.23264	20.915	21.462	21.0949	21.3382	21.1454	21.3757	20.9348	21.1213
	O43776	SYNC_HUMAN Asparagine--tRNA ligase, cytoplasmic OS=Homo sapiens OX=9606 GN=NARS1 PE=1 SV=1	13	0.0337691	1.229	18.8911	19.4476	18.9698	19.1669	18.7966	18.9492	18.8633	19.1471
	P35579	MYH9_HUMAN Myosin-9 OS=Homo sapiens OX=9606 GN=MYH9 PE=1 SV=4	89	0.0365342	1.22786	21.2075	21.7082	21.6441	21.839	21.4043	21.729	21.6466	21.8109
	Q00610	CLH1_HUMAN Clathrin heavy chain 1 OS=Homo sapiens OX=9606 GN=CLTC PE=1 SV=5	73	0.00141078	1.2173	20.6135	21.0301	20.5915	20.9416	20.7341	20.9454	20.7795	20.9362
	Q9P0J1	PDP1_HUMAN [Pyruvate dehydrogenase [acetyl-transferring]]-phosphatase 1, mitochondrial OS=Homo sapiens OX=9606 GN=PDP1 PE=1 SV=3	8	0.0175231	1.20631	16.7141	16.8858	16.7529	16.9459	16.788	17.0265	16.446	16.9252
	P49368	TCPG_HUMAN T-complex protein 1 subunit gamma OS=Homo sapiens OX=9606 GN=CCT3 PE=1 SV=4	29	0.0211388	1.20531	20.0692	20.587	20.175	20.5245	20.1951	20.348	20.4056	20.463
	P31948	STIP1_HUMAN Stress-induced-phosphoprotein 1 OS=Homo sapiens OX=9606 GN=STIP1 PE=1 SV=1	19	0.0469991	1.20408	19.9685	20.3655	20.3466	20.3571	20.0141	20.4477	20.3126	20.5432
	P25705	ATPA_HUMAN ATP synthase subunit alpha, mitochondrial OS=Homo sapiens OX=9606 GN=ATP5F1A PE=1 SV=1	17	0.0120274	1.20152	19.6775	19.6739	19.6292	19.9144	19.5648	19.8833	19.5185	19.9778
	P61224	RAP1B_HUMAN Ras-related protein Rap-1b OS=Homo sapiens OX=9606 GN=RAP1B PE=1 SV=1;sp	3	0.00788624	1.19662	18.9766	19.1037	19.0066	19.3917	19.0632	19.2262	18.9401	19.3009
	O00410	IPO5_HUMAN Importin-5 OS=Homo sapiens OX=9606 GN=IPO5 PE=1 SV=4	32	0.0100531	1.19557	18.138	18.6253	18.1953	18.4184	18.1601	18.3122	18.2078	18.3762
	P47897	SYQ_HUMAN Glutamine--tRNA ligase OS=Homo sapiens OX=9606 GN=QARS1 PE=1 SV=1	20	0.0399521	1.17481	18.5507	18.7921	18.6222	19.0074	18.5742	18.8157	18.8693	18.9309
	Q9Y2Q3	GSTK1_HUMAN Glutathione S-transferase kappa 1 OS=Homo sapiens OX=9606 GN=GSTK1 PE=1 SV=3	9	0.0230632	1.16915	19.0769	19.4399	19.2597	19.3747	19.3025	19.4184	19.0144	19.3224
	P06576	ATPB_HUMAN ATP synthase subunit beta, mitochondrial OS=Homo sapiens OX=9606 GN=ATP5F1B PE=1 SV=3	23	0.00455135	1.16792	21.1768	21.5823	21.2109	21.4369	21.2996	21.4682	21.301	21.3964
	P08670	VIME_HUMAN Vimentin OS=Homo sapiens OX=9606 GN=VIM PE=1 SV=4	44	0.0275195	1.1596	24.5835	24.8041	24.4317	24.8308	24.5235	24.7225	24.7636	24.7994
	P34896	GLYC_HUMAN Serine hydroxymethyltransferase, cytosolic OS=Homo sapiens OX=9606 GN=SHMT1 PE=1 SV=1	8	0.014315	1.14464	17.6241	18.0379	17.753	17.9491	17.8177	17.859	17.7996	17.9279
	P14314	GLU2B_HUMAN Glucosidase 2 subunit beta OS=Homo sapiens OX=9606 GN=PRKCSH PE=1 SV=2	14	0.0444007	1.14123	19.9559	20.1197	19.8305	19.99	20.0055	20.0051	19.753	20.1926
	Q99832	TCPH_HUMAN T-complex protein 1 subunit eta OS=Homo sapiens OX=9606 GN=CCT7 PE=1 SV=2	20	0.0460946	1.13952	20.1012	20.2821	20.088	20.244	20.314	20.4823	20.1103	20.3589
	P14618	KPYM_HUMAN Pyruvate kinase PKM OS=Homo sapiens OX=9606 GN=PKM PE=1 SV=4	37	0.0361526	1.13277	23.5629	23.843	23.4082	23.6769	23.5042	23.6343	23.6381	23.6786
	Q7Z2W4	ZCCHV_HUMAN Zinc finger CCCH-type antiviral protein 1 OS=Homo sapiens OX=9606 GN=ZC3HAV1 PE=1 SV=3	18	0.0336628	1.13123	16.664	16.7941	16.6402	16.8877	16.8756	16.9184	16.6549	16.946
	Q96AG4	LRC59_HUMAN Leucine-rich repeat-containing protein 59 OS=Homo sapiens OX=9606 GN=LRRC59 PE=1 SV=1	8	0.0106689	0.920618	19.469	19.3683	19.5503	19.3489	19.4769	19.4596	19.5011	19.3433
	P35221	CTNA1_HUMAN Catenin alpha-1 OS=Homo sapiens OX=9606 GN=CTNNA1 PE=1 SV=1	21	0.0147843	0.902377	18.3422	18.3481	18.3848	18.2359	18.4067	18.2331	18.4337	18.1574
	P13639	EF2_HUMAN Elongation factor 2 OS=Homo sapiens OX=9606 GN=EEF2 PE=1 SV=4	42	0.0269339	0.875225	22.0346	21.9408	22.1613	21.9221	22.1723	21.8863	22.2536	22.1035
	Q13938	CAYP1_HUMAN Calcyphosin OS=Homo sapiens OX=9606 GN=CAPS PE=1 SV=2	8	0.0426599	0.872772	20.1833	19.7158	20.01	19.9596	20.0254	19.9301	20.1605	19.9884
	O95202	LETM1_HUMAN Mitochondrial proton/calcium exchanger protein OS=Homo sapiens OX=9606 GN=LETM1 PE=1 SV=1	12	0.0405117	0.852102	17.5044	17.3444	17.3447	17.1467	17.5874	17.1239	17.2676	17.1656
	P12004	PCNA_HUMAN Proliferating cell nuclear antigen OS=Homo sapiens OX=9606 GN=PCNA PE=1 SV=1	4	0.0385292	0.847993	18.4092	18.0994	18.2637	18.341	18.3972	18.1996	18.5746	18.053
	O75367	H2AY_HUMAN Core histone macro-H2A.1 OS=Homo sapiens OX=9606 GN=MACROH2A1 PE=1 SV=4	9	0.0194922	0.847261	19.491	18.9641	19.2537	19.1184	19.2968	19.1546	19.3752	19.2231
	Q53H12	AGK_HUMAN Acylglycerol kinase, mitochondrial OS=Homo sapiens OX=9606 GN=AGK PE=1 SV=2	5	0.0456384	0.845822	18.9388	18.7311	18.6199	18.5207	18.7394	18.4547	18.7947	18.42
	O75131	CPNE3_HUMAN Copine-3 OS=Homo sapiens OX=9606 GN=CPNE3 PE=1 SV=1	10	0.0108079	0.834707	17.7654	17.4449	17.7924	17.5153	17.7157	17.6273	17.9754	17.6186
	Q969N2	PIGT_HUMAN GPI transamidase component PIG-T OS=Homo sapiens OX=9606 GN=PIGT PE=1 SV=1	2	0.0154575	0.825162	16.9766	16.9752	17.0127	16.7037	17.1831	16.8142	17.1004	16.6707
	Q01082	SPTB2_HUMAN Spectrin beta chain, non-erythrocytic 1 OS=Homo sapiens OX=9606 GN=SPTBN1 PE=1 SV=2	81	0.00363521	0.823689	19.1624	18.8451	19.1119	18.7014	19.0015	18.7813	18.9288	18.7575
	O95347	SMC2_HUMAN Structural maintenance of chromosomes protein 2 OS=Homo sapiens OX=9606 GN=SMC2 PE=1 SV=2	17	0.0257111	0.820648	17.9907	17.6992	17.6957	17.7181	17.9527	17.6631	18.0975	17.5156
	P27694	RFA1_HUMAN Replication protein A 70 kDa DNA-binding subunit OS=Homo sapiens OX=9606 GN=RPA1 PE=1 SV=2	10	0.00988508	0.818276	17.4977	17.1676	17.6776	17.2353	17.332	17.1577	17.3908	17.1802
	O60256	KPRB_HUMAN Phosphoribosyl pyrophosphate synthase-associated protein 2 OS=Homo sapiens OX=9606 GN=PRPSAP2 PE=1 SV=1	7	0.0455229	0.794287	16.0152	16.0329	16.5528	15.9093	16.4126	15.8436	16.2729	16.1386
	P35611	ADDA_HUMAN Alpha-adducin OS=Homo sapiens OX=9606 GN=ADD1 PE=1 SV=2	9	0.0388428	0.792088	17.485	16.9072	17.6766	17.2779	17.2481	17.0085	17.3013	17.1723
	P17844	DDX5_HUMAN Probable ATP-dependent RNA helicase DDX5 OS=Homo sapiens OX=9606 GN=DDX5 PE=1 SV=1	15	0.042925	0.791234	19.2377	19.1687	19.2238	18.8564	19.1395	19.0393	19.4772	18.6625
	Q92945	FUBP2_HUMAN Far upstream element-binding protein 2 OS=Homo sapiens OX=9606 GN=KHSRP PE=1 SV=4	13	0.0103999	0.790768	19.2622	19.0903	19.1664	18.7819	19.4359	19.0354	19.2538	18.856
	P51665	PSMD7_HUMAN 26S proteasome non-ATPase regulatory subunit 7 OS=Homo sapiens OX=9606 GN=PSMD7 PE=1 SV=2	8	0.0204329	0.790615	18.6696	18.7078	18.8352	18.2162	18.8245	18.4561	18.8162	18.4096
	O15061	SYNEM_HUMAN Synemin OS=Homo sapiens OX=9606 GN=SYNM PE=1 SV=2	16	0.0278535	0.790343	17.5491	17.4198	17.4246	17.2713	17.886	17.2195	17.5312	17.1225
	O75643	U520_HUMAN U5 small nuclear ribonucleoprotein 200 kDa helicase OS=Homo sapiens OX=9606 GN=SNRNP200 PE=1 SV=2	45	0.0109302	0.788188	18.1767	17.66	17.7994	17.6377	18.0242	17.541	17.8103	17.5983
	P22087	FBRL_HUMAN rRNA 2-O-methyltransferase fibrillarin OS=Homo sapiens OX=9606 GN=FBL PE=1 SV=2	9	0.00435793	0.784227	18.7353	18.4826	18.5754	18.415	18.8927	18.4153	18.7904	18.2784
	P42704	LPPRC_HUMAN Leucine-rich PPR motif-containing protein, mitochondrial OS=Homo sapiens OX=9606 GN=LRPPRC PE=1 SV=3	38	0.0133134	0.781745	18.64	18.1106	18.3149	18.0232	18.3065	17.8995	18.2177	18.0249
	P33993	MCM7_HUMAN DNA replication licensing factor MCM7 OS=Homo sapiens OX=9606 GN=MCM7 PE=1 SV=4	14	0.0195853	0.775779	18.9985	18.7752	18.7526	18.3527	18.7433	18.4353	18.9267	18.3927
	Q13813	SPTN1_HUMAN Spectrin alpha chain, non-erythrocytic 1 OS=Homo sapiens OX=9606 GN=SPTAN1 PE=1 SV=3	68	0.00414248	0.774402	19.2151	18.7441	18.9453	18.5757	18.9873	18.559	18.954	18.7476
	Q8WVY7	UBCP1_HUMAN Ubiquitin-like domain-containing CTD phosphatase 1 OS=Homo sapiens OX=9606 GN=UBLCP1 PE=1 SV=2	3	0.0325529	0.76786	15.9013	15.6177	15.7903	15.5428	16.1269	15.2729	15.5717	15.4326
	Q9UIJ7	KAD3_HUMAN GTP:AMP phosphotransferase AK3, mitochondrial OS=Homo sapiens OX=9606 GN=AK3 PE=1 SV=4	5	0.0166567	0.764218	17.7239	17.3015	17.5313	17.4687	17.5005	17.0641	17.8499	17.2195
	P78559	MAP1A_HUMAN Microtubule-associated protein 1A OS=Homo sapiens OX=9606 GN=MAP1A PE=1 SV=6	30	0.0299764	0.76078	18.3051	17.792	17.9286	17.4915	17.7653	17.4779	18.0633	17.7231
	Q13200	PSMD2_HUMAN 26S proteasome non-ATPase regulatory subunit 2 OS=Homo sapiens OX=9606 GN=PSMD2 PE=1 SV=3	35	0.000172926	0.760595	19.8676	19.4951	19.8011	19.407	19.7584	19.4352	19.7845	19.2952
	Q03001	DYST_HUMAN Dystonin OS=Homo sapiens OX=9606 GN=DST PE=1 SV=4	74	0.0320302	0.75583	19.0154	18.4161	18.8881	18.3408	18.89	18.3211	18.3817	18.4817
	Q96KP4	CNDP2_HUMAN Cytosolic non-specific dipeptidase OS=Homo sapiens OX=9606 GN=CNDP2 PE=1 SV=2	15	0.0255794	0.754766	17.4091	16.8449	16.9253	16.7216	17.3369	16.6161	17.145	17.0102
	P63244	RACK1_HUMAN Receptor of activated protein C kinase 1 OS=Homo sapiens OX=9606 GN=RACK1 PE=1 SV=3	12	0.0214501	0.753725	19.7542	19.7757	19.895	19.4972	20.1055	19.3729	19.8067	19.2841
	Q9NR28	DBLOH_HUMAN Diablo homolog, mitochondrial OS=Homo sapiens OX=9606 GN=DIABLO PE=1 SV=1	3	0.0257211	0.750735	16.8057	16.2316	16.7983	16.362	16.5636	16.518	16.5463	15.9478
	P09874	PARP1_HUMAN Poly [ADP-ribose] polymerase 1 OS=Homo sapiens OX=9606 GN=PARP1 PE=1 SV=4	25	0.00308653	0.74927	18.7914	18.2294	18.6813	18.0707	18.5113	18.3862	18.6421	18.274
	P41567	EIF1_HUMAN Eukaryotic translation initiation factor 1 OS=Homo sapiens OX=9606 GN=EIF1 PE=1 SV=1;sp	8	0.0211768	0.748127	19.1056	18.7952	19.0044	18.912	19.3206	18.6988	19.0288	18.3788
	Q96N67	DOCK7_HUMAN Dedicator of cytokinesis protein 7 OS=Homo sapiens OX=9606 GN=DOCK7 PE=1 SV=4	18	0.0286411	0.745156	16.6651	16.1548	16.6782	16.4652	17.0153	16.2649	16.3839	16.16
	O43237	DC1L2_HUMAN Cytoplasmic dynein 1 light intermediate chain 2 OS=Homo sapiens OX=9606 GN=DYNC1LI2 PE=1 SV=1	12	0.00504871	0.741695	17.939	17.24	17.6888	17.5625	17.9247	17.561	17.9745	17.4392
	P61247	RS3A_HUMAN 40S ribosomal protein S3a OS=Homo sapiens OX=9606 GN=RPS3A PE=1 SV=2	6	0.0343155	0.741446	20.4513	19.8958	20.4005	19.8668	19.7919	19.7105	20.2699	19.7142
	Q13283	G3BP1_HUMAN Ras GTPase-activating protein-binding protein 1 OS=Homo sapiens OX=9606 GN=G3BP1 PE=1 SV=1	13	0.000181451	0.740915	19.7022	19.2319	19.6283	19.0882	19.6481	19.3329	19.6393	19.2343
	P40937	RFC5_HUMAN Replication factor C subunit 5 OS=Homo sapiens OX=9606 GN=RFC5 PE=1 SV=1	4	0.0410535	0.736245	17.8926	17.4007	17.4944	17.2614	17.3794	17.0547	17.525	16.8075
	P53701	CCHL_HUMAN Cytochrome c-type heme lyase OS=Homo sapiens OX=9606 GN=HCCS PE=1 SV=1	6	0.0373525	0.735966	17.1049	16.4358	16.4186	16.326	16.6577	16.2778	16.664	16.0365
	Q9UBS4	DJB11_HUMAN DnaJ homolog subfamily B member 11 OS=Homo sapiens OX=9606 GN=DNAJB11 PE=1 SV=1	11	0.0172266	0.735654	18.7336	17.7382	18.3135	18.0923	18.4297	18.1642	18.4609	18.1713
	Q13435	SF3B2_HUMAN Splicing factor 3B subunit 2 OS=Homo sapiens OX=9606 GN=SF3B2 PE=1 SV=2	19	0.0138334	0.734651	18.1965	17.458	18.0836	17.6034	18.3185	17.9601	18.0181	17.8157
	Q99986	VRK1_HUMAN Serine/threonine-protein kinase VRK1 OS=Homo sapiens OX=9606 GN=VRK1 PE=1 SV=1	3	0.017204	0.733156	16.3785	15.8414	15.8529	15.5686	16.0391	15.6673	16.0468	15.4488
	O00487	PSDE_HUMAN 26S proteasome non-ATPase regulatory subunit 14 OS=Homo sapiens OX=9606 GN=PSMD14 PE=1 SV=1	4	0.0414124	0.727613	19.0993	18.7384	19.1979	18.6592	19.4603	18.7627	18.6814	18.4435
	Q15003	CND2_HUMAN Condensin complex subunit 2 OS=Homo sapiens OX=9606 GN=NCAPH PE=1 SV=3	9	0.0278734	0.727514	16.8752	16.1742	16.3764	16.1903	16.9402	16.2476	16.3601	16.1041
	Q08AM6	VAC14_HUMAN Protein VAC14 homolog OS=Homo sapiens OX=9606 GN=VAC14 PE=1 SV=1	3	0.0396086	0.72649	16.2415	15.5283	15.7259	15.5931	15.6515	15.1482	15.7149	15.2203
	P46939	UTRO_HUMAN Utrophin OS=Homo sapiens OX=9606 GN=UTRN PE=1 SV=2	46	0.0041319	0.722886	17.7993	17.3426	17.6997	17.3366	18.0409	17.2687	17.5545	17.2739
	P00441	SODC_HUMAN Superoxide dismutase [Cu-Zn] OS=Homo sapiens OX=9606 GN=SOD1 PE=1 SV=2	5	0.0493151	0.722608	20.0769	19.0858	19.4278	19.289	20.0511	19.6036	19.6528	19.3555
	P11388	TOP2A_HUMAN DNA topoisomerase 2-alpha OS=Homo sapiens OX=9606 GN=TOP2A PE=1 SV=3	20	0.0300172	0.7219	18.423	18.1724	18.9293	18.2688	19.0385	18.4444	18.9525	18.5773
	O14974	MYPT1_HUMAN Protein phosphatase 1 regulatory subunit 12A OS=Homo sapiens OX=9606 GN=PPP1R12A PE=1 SV=1	16	0.0115638	0.717911	17.7805	16.9351	17.8341	17.5356	17.8145	17.4155	17.7749	17.4053
	Q14123	PDE1C_HUMAN Calcium/calmodulin-dependent 3,5-cyclic nucleotide phosphodiesterase 1C OS=Homo sapiens OX=9606 GN=PDE1C PE=1 SV=1	19	0.0483459	0.71528	18.2857	17.8055	18.2015	17.8739	18.4192	18.2026	18.9724	18.0631
	Q9NXF1	TEX10_HUMAN Testis-expressed protein 10 OS=Homo sapiens OX=9606 GN=TEX10 PE=1 SV=2	5	0.0271788	0.71299	15.8739	15.6664	15.7056	15.6747	16.1421	15.4833	16.2321	15.1771
	Q96AQ6	PBIP1_HUMAN Pre-B-cell leukemia transcription factor-interacting protein 1 OS=Homo sapiens OX=9606 GN=PBXIP1 PE=1 SV=1	4	0.00955697	0.712286	16.0177	15.6272	16.2457	15.3691	16.1275	15.4605	15.8131	15.7893
	Q9UQE7	SMC3_HUMAN Structural maintenance of chromosomes protein 3 OS=Homo sapiens OX=9606 GN=SMC3 PE=1 SV=2	19	0.0491202	0.704718	17.7106	16.4707	17.5647	16.9849	17.3141	17.1617	17.0888	17.0413
	Q96I24	FUBP3_HUMAN Far upstream element-binding protein 3 OS=Homo sapiens OX=9606 GN=FUBP3 PE=1 SV=2	8	0.0219553	0.701078	17.3991	16.8522	17.1396	16.7573	17.3805	16.75	16.855	16.3652
	Q6P2Q9	PRP8_HUMAN Pre-mRNA-processing-splicing factor 8 OS=Homo sapiens OX=9606 GN=PRPF8 PE=1 SV=2	42	0.00907821	0.699141	18.7216	18.0235	18.3821	18.0432	18.8159	18.0482	18.2462	17.9855
	Q92665	RT31_HUMAN 28S ribosomal protein S31, mitochondrial OS=Homo sapiens OX=9606 GN=MRPS31 PE=1 SV=3	6	0.0172227	0.698689	16.932	15.9925	16.7428	16.0907	16.239	16.1622	16.4399	16.0392
	P35222	CTNB1_HUMAN Catenin beta-1 OS=Homo sapiens OX=9606 GN=CTNNB1 PE=1 SV=1	16	0.00861747	0.697878	18.7978	17.9099	18.5119	18.0966	18.2757	17.8076	18.3056	18.0011
	Q9P258	RCC2_HUMAN Protein RCC2 OS=Homo sapiens OX=9606 GN=RCC2 PE=1 SV=2	9	0.00373723	0.693554	18.4618	18.1993	18.3383	18.0462	18.6794	17.9279	18.763	17.9574
	Q8N1F7	NUP93_HUMAN Nuclear pore complex protein Nup93 OS=Homo sapiens OX=9606 GN=NUP93 PE=1 SV=2	16	0.0319772	0.690279	17.8571	17.2209	17.2926	17.4149	18.1798	17.2289	17.9178	17.2436
	O00469	PLOD2_HUMAN Procollagen-lysine,2-oxoglutarate 5-dioxygenase 2 OS=Homo sapiens OX=9606 GN=PLOD2 PE=1 SV=2	15	0.0129354	0.687619	18.4277	18.1799	19.0403	17.9173	18.5233	18.2657	18.6077	18.0748
	Q9BQ52	RNZ2_HUMAN Zinc phosphodiesterase ELAC protein 2 OS=Homo sapiens OX=9606 GN=ELAC2 PE=1 SV=2	13	0.00986688	0.671673	17.8032	17.2814	18.0648	17.5068	18.3226	17.7695	18.256	17.5921
	Q9NZN4	EHD2_HUMAN EH domain-containing protein 2 OS=Homo sapiens OX=9606 GN=EHD2 PE=1 SV=2	13	0.000581808	0.67151	18.258	17.9109	18.2901	17.6128	18.1609	17.5612	18.2508	17.5768
	Q99615	DNJC7_HUMAN DnaJ homolog subfamily C member 7 OS=Homo sapiens OX=9606 GN=DNAJC7 PE=1 SV=2	10	0.00737632	0.670537	17.5683	16.7966	17.4973	17.0856	17.8323	17.3828	17.6044	16.9309
	P51398	RT29_HUMAN 28S ribosomal protein S29, mitochondrial OS=Homo sapiens OX=9606 GN=DAP3 PE=1 SV=1	6	0.0163426	0.670229	17.0228	16.66	16.8267	16.2497	16.5706	16.2018	17.1966	16.1963
	P07996	TSP1_HUMAN Thrombospondin-1 OS=Homo sapiens OX=9606 GN=THBS1 PE=1 SV=2	8	0.0285535	0.667319	17.8745	17.0887	17.9158	16.7191	17.377	17.1537	17.204	17.0757
	P16403	H12_HUMAN Histone H1.2 OS=Homo sapiens OX=9606 GN=H1-2 PE=1 SV=2;sp	4	0.0361843	0.665004	18.4751	18.3151	18.2866	17.4439	18.1415	17.7144	18.7016	17.7772
	P36551	HEM6_HUMAN Oxygen-dependent coproporphyrinogen-III oxidase, mitochondrial OS=Homo sapiens OX=9606 GN=CPOX PE=1 SV=3	6	0.0495827	0.664126	16.5404	16.087	15.9789	16.1573	16.8673	16.0199	16.9228	15.6832
	Q12965	MYO1E_HUMAN Unconventional myosin-Ie OS=Homo sapiens OX=9606 GN=MYO1E PE=1 SV=2	11	0.0157333	0.664028	17.8378	17.0107	17.1562	16.6814	17.2636	16.865	17.6499	16.9877
	Q02952	AKA12_HUMAN A-kinase anchor protein 12 OS=Homo sapiens OX=9606 GN=AKAP12 PE=1 SV=4	52	0.00894149	0.660813	20.1154	18.9672	19.4129	19.1223	19.7102	19.2514	19.6759	19.1828
	P07339	CATD_HUMAN Cathepsin D OS=Homo sapiens OX=9606 GN=CTSD PE=1 SV=1	11	0.0244906	0.660723	20.3341	20.0934	20.9795	19.9838	20.4798	20.2467	21.1275	20.2054
	Q9NVS9	PNPO_HUMAN Pyridoxine-5-phosphate oxidase OS=Homo sapiens OX=9606 GN=PNPO PE=1 SV=1	6	0.0496021	0.660572	18.4179	17.3122	17.6107	17.2954	17.4418	17.3968	17.7954	16.8686
	Q52LW3	RHG29_HUMAN Rho GTPase-activating protein 29 OS=Homo sapiens OX=9606 GN=ARHGAP29 PE=1 SV=2	12	0.00975484	0.660289	16.4462	15.7859	16.8062	16.1447	16.2667	15.9273	16.3639	15.63
	Q96T51	RUFY1_HUMAN RUN and FYVE domain-containing protein 1 OS=Homo sapiens OX=9606 GN=RUFY1 PE=1 SV=2	8	0.0116893	0.658197	16.1779	15.3305	16.2706	15.401	15.9832	15.6431	15.6104	15.254
	P16070	CD44_HUMAN CD44 antigen OS=Homo sapiens OX=9606 GN=CD44 PE=1 SV=3	8	0.0191779	0.657024	21.0004	20.4045	20.346	20.2576	21.1938	20.1246	20.9017	20.2312
	Q8NBJ7	SUMF2_HUMAN Inactive C-alpha-formylglycine-generating enzyme 2 OS=Homo sapiens OX=9606 GN=SUMF2 PE=1 SV=2	5	0.00631902	0.654529	17.363	17.071	17.2524	16.865	17.6443	16.9488	17.8483	16.7774
	Q15067	ACOX1_HUMAN Peroxisomal acyl-coenzyme A oxidase 1 OS=Homo sapiens OX=9606 GN=ACOX1 PE=1 SV=3	11	0.0256248	0.654371	17.1136	16.0443	16.7108	16.1634	17.0573	16.3015	16.2413	16.1665
	P35613	BASI_HUMAN Basigin OS=Homo sapiens OX=9606 GN=BSG PE=1 SV=2	6	0.0452158	0.653674	19.8513	19.2913	19.5038	19.2424	20.279	19.2316	19.3386	18.7539
	P06703	S10A6_HUMAN Protein S100-A6 OS=Homo sapiens OX=9606 GN=S100A6 PE=1 SV=1	6	0.035135	0.649258	20.882	19.9891	20.068	20.1453	20.9017	20.1671	21.0821	20.1398
	O00754	MA2B1_HUMAN Lysosomal alpha-mannosidase OS=Homo sapiens OX=9606 GN=MAN2B1 PE=1 SV=3	9	0.0125968	0.648562	17.5872	16.7555	17.116	16.5372	16.8923	16.7103	17.565	16.6587
	P12277	KCRB_HUMAN Creatine kinase B-type OS=Homo sapiens OX=9606 GN=CKB PE=1 SV=1	13	0.0237334	0.64505	19.2853	18.1851	18.6312	18.3905	19.2136	18.2422	18.466	18.2481
	Q08380	LG3BP_HUMAN Galectin-3-binding protein OS=Homo sapiens OX=9606 GN=LGALS3BP PE=1 SV=1	9	0.000478112	0.644019	17.924	17.3894	18.0754	17.262	17.7815	17.465	18.1066	17.2318
	Q9GZY8	MFF_HUMAN Mitochondrial fission factor OS=Homo sapiens OX=9606 GN=MFF PE=1 SV=1	4	0.00317483	0.63977	17.2435	16.7624	17.3078	16.45	16.9306	16.3685	16.9946	16.318
	Q14011	CIRBP_HUMAN Cold-inducible RNA-binding protein OS=Homo sapiens OX=9606 GN=CIRBP PE=1 SV=1	2	0.00144208	0.632947	16.8534	16.1412	16.4799	15.994	16.5109	15.9575	16.6254	15.7376
	P55263	ADK_HUMAN Adenosine kinase OS=Homo sapiens OX=9606 GN=ADK PE=1 SV=2	6	0.00766143	0.631978	18.4294	17.2681	18.1308	17.6359	18.4269	17.9765	18.364	17.8223
	Q00341	VIGLN_HUMAN Vigilin OS=Homo sapiens OX=9606 GN=HDLBP PE=1 SV=2	23	0.00584319	0.628457	18.5401	18.0328	18.2209	17.7754	18.6506	17.5362	18.1961	17.5828
	P62979	RS27A_HUMAN Ubiquitin-40S ribosomal protein S27a OS=Homo sapiens OX=9606 GN=RPS27A PE=1 SV=2;sp	11	0.019254	0.626983	19.7103	19.3392	19.5274	19.3832	20.3647	19.0203	20.1705	19.3363
	Q9P2E9	RRBP1_HUMAN Ribosome-binding protein 1 OS=Homo sapiens OX=9606 GN=RRBP1 PE=1 SV=5	25	0.0126718	0.626172	19.4033	18.5031	19.727	18.9386	19.2198	19.0746	19.8484	18.9807
	Q6ZRP7	QSOX2_HUMAN Sulfhydryl oxidase 2 OS=Homo sapiens OX=9606 GN=QSOX2 PE=1 SV=3	7	0.00923273	0.622312	15.9207	14.5855	15.2446	14.7065	15.2371	14.7835	15.1812	14.771
	Q96GK7	FAH2A_HUMAN Fumarylacetoacetate hydrolase domain-containing protein 2A OS=Homo sapiens OX=9606 GN=FAHD2A PE=1 SV=1;sp	5	0.039493	0.619187	17.5611	16.112	16.9632	16.8036	17.7396	17.0385	17.2173	16.7608
	P51970	NDUA8_HUMAN NADH dehydrogenase [ubiquinone] 1 alpha subcomplex subunit 8 OS=Homo sapiens OX=9606 GN=NDUFA8 PE=1 SV=3	5	0.0235353	0.618741	16.9088	16.2667	16.5332	16.1863	16.7464	15.924	16.359	15.4
	P13987	CD59_HUMAN CD59 glycoprotein OS=Homo sapiens OX=9606 GN=CD59 PE=1 SV=1	2	0.000909997	0.618178	19.1207	18.4424	18.9297	18.3581	18.9416	18.4427	19.4115	18.3846
	Q13510	ASAH1_HUMAN Acid ceramidase OS=Homo sapiens OX=9606 GN=ASAH1 PE=1 SV=5	3	0.0139242	0.61769	18.1613	17.7551	18.5753	17.6177	17.9509	17.8532	18.6014	17.2827
	O95983	MBD3_HUMAN Methyl-CpG-binding domain protein 3 OS=Homo sapiens OX=9606 GN=MBD3 PE=1 SV=1	3	0.00501187	0.614552	15.4438	14.5521	15.2198	14.3637	14.7031	14.3306	15.0901	14.4007
	P67775	PP2AA_HUMAN Serine/threonine-protein phosphatase 2A catalytic subunit alpha isoform OS=Homo sapiens OX=9606 GN=PPP2CA PE=1 SV=1;sp	8	0.0482792	0.614413	19.0441	18.3914	18.0504	18.0265	19.0304	17.7225	18.5524	17.726
	P14136	GFAP_HUMAN Glial fibrillary acidic protein OS=Homo sapiens OX=9606 GN=GFAP PE=1 SV=1	23	0.00268596	0.613637	23.4069	22.6724	22.9961	22.3222	23.5	22.7289	23.2093	22.5705
	Q9HAS0	NJMU_HUMAN Protein Njmu-R1 OS=Homo sapiens OX=9606 GN=C17orf75 PE=1 SV=2	4	0.00837568	0.612929	14.3053	13.8103	13.9327	13.2279	14.145	13.1064	14.21	13.6235
	P14735	IDE_HUMAN Insulin-degrading enzyme OS=Homo sapiens OX=9606 GN=IDE PE=1 SV=4	9	0.0147414	0.612267	17.0707	15.8841	16.3613	15.9623	16.3618	15.7225	16.2118	15.6057
	O60927	PP1RB_HUMAN E3 ubiquitin-protein ligase PPP1R11 OS=Homo sapiens OX=9606 GN=PPP1R11 PE=1 SV=1	2	0.0282879	0.612168	16.5804	15.5273	15.62	15.3116	16.0095	15.7164	16.2351	15.0577
	P10253	LYAG_HUMAN Lysosomal alpha-glucosidase OS=Homo sapiens OX=9606 GN=GAA PE=1 SV=4	4	0.0102558	0.608881	18.4684	17.4309	18.0601	17.1185	17.5901	17.3819	17.9372	17.2615
	Q14669	TRIPC_HUMAN E3 ubiquitin-protein ligase TRIP12 OS=Homo sapiens OX=9606 GN=TRIP12 PE=1 SV=1	13	0.018365	0.608258	17.1582	16.3164	16.6695	16.1328	16.9674	15.9392	16.2696	15.8073
	Q6VN20	RBP10_HUMAN Ran-binding protein 10 OS=Homo sapiens OX=9606 GN=RANBP10 PE=1 SV=1	1	0.0371108	0.601961	14.6189	13.1622	14.0447	13.2385	13.9504	14.0755	14.534	13.7426
	P62633	CNBP_HUMAN Cellular nucleic acid-binding protein OS=Homo sapiens OX=9606 GN=CNBP PE=1 SV=1	4	0.0227798	0.601065	17.1161	15.7256	16.5827	16.3555	16.9656	16.5643	17.3218	16.4032
	Q14181	DPOA2_HUMAN DNA polymerase alpha subunit B OS=Homo sapiens OX=9606 GN=POLA2 PE=1 SV=2	2	0.0491915	0.599451	17.4362	16.1734	17.6898	17.3319	18.0103	17.1817	17.7949	17.291
	O75976	CBPD_HUMAN Carboxypeptidase D OS=Homo sapiens OX=9606 GN=CPD PE=1 SV=2	10	0.000157928	0.598889	16.9024	16.0352	16.9505	16.1789	16.5959	16.0617	16.781	15.9953
	P53985	MOT1_HUMAN Monocarboxylate transporter 1 OS=Homo sapiens OX=9606 GN=SLC16A1 PE=1 SV=3	4	0.0494197	0.596834	19.8939	18.121	18.8752	18.473	19.2499	18.6401	18.5811	18.3877
	O15042	SR140_HUMAN U2 snRNP-associated SURP motif-containing protein OS=Homo sapiens OX=9606 GN=U2SURP PE=1 SV=2	5	0.0324302	0.595738	16.8911	15.5643	15.6246	15.4679	16.0626	15.3527	16.3461	15.5505
	O75534	CSDE1_HUMAN Cold shock domain-containing protein E1 OS=Homo sapiens OX=9606 GN=CSDE1 PE=1 SV=2	18	0.0157845	0.595036	18.3197	17.4251	17.5499	17.3526	18.5368	17.3248	17.8955	17.2036
	P51116	FXR2_HUMAN Fragile X mental retardation syndrome-related protein 2 OS=Homo sapiens OX=9606 GN=FXR2 PE=1 SV=2	6	0.00149187	0.594063	17.1175	16.3748	16.8742	16.1227	16.6822	15.8842	16.9296	16.2166
	P35249	RFC4_HUMAN Replication factor C subunit 4 OS=Homo sapiens OX=9606 GN=RFC4 PE=1 SV=2	4	0.0119127	0.591849	17.345	16.0325	16.7738	16.307	17.234	16.4967	16.5801	16.0697
	Q9H0G5	NSRP1_HUMAN Nuclear speckle splicing regulatory protein 1 OS=Homo sapiens OX=9606 GN=NSRP1 PE=1 SV=1	2	0.0263409	0.587463	15.4585	14.3099	15.5706	14.4314	15.1173	15.2507	15.1398	14.2245
	P06493	CDK1_HUMAN Cyclin-dependent kinase 1 OS=Homo sapiens OX=9606 GN=CDK1 PE=1 SV=3	10	0.0124111	0.584038	19.5257	18.5091	19.3411	18.1957	18.7096	18.2712	18.7379	18.2349
	P07602	SAP_HUMAN Prosaposin OS=Homo sapiens OX=9606 GN=PSAP PE=1 SV=2	12	0.0259448	0.582418	16.8264	15.6365	17.0498	16.4006	16.6234	16.6368	17.3185	16.0248
	Q14683	SMC1A_HUMAN Structural maintenance of chromosomes protein 1A OS=Homo sapiens OX=9606 GN=SMC1A PE=1 SV=2	19	0.0370886	0.580314	17.5668	15.7026	17.1661	16.3039	17.0632	16.5685	16.7356	16.8163
	Q9Y314	NOSIP_HUMAN Nitric oxide synthase-interacting protein OS=Homo sapiens OX=9606 GN=NOSIP PE=1 SV=1	3	0.0268442	0.580027	16.3519	15.5602	16.0611	15.4777	16.8025	15.4982	15.6013	15.1374
	Q13613	MTMR1_HUMAN Myotubularin-related protein 1 OS=Homo sapiens OX=9606 GN=MTMR1 PE=1 SV=4	2	0.0416706	0.578837	15.6812	14.2873	14.6065	14.6208	15.6248	14.6139	14.8296	14.065
	P16278	BGAL_HUMAN Beta-galactosidase OS=Homo sapiens OX=9606 GN=GLB1 PE=1 SV=2	9	0.00358558	0.577001	17.081	16.5629	17.4603	16.2273	16.8178	16.5051	17.4234	16.3137
	P09382	LEG1_HUMAN Galectin-1 OS=Homo sapiens OX=9606 GN=LGALS1 PE=1 SV=2	6	0.00368188	0.57459	21.3985	20.3419	20.8833	20.4023	21.0577	20.6831	21.4613	20.176
	Q9P0J0	NDUAD_HUMAN NADH dehydrogenase [ubiquinone] 1 alpha subcomplex subunit 13 OS=Homo sapiens OX=9606 GN=NDUFA13 PE=1 SV=3	4	0.0448208	0.571777	16.5446	16.0486	16.6873	16.0293	16.2308	16.1413	17.6213	15.6389
	Q9Y639	NPTN_HUMAN Neuroplastin OS=Homo sapiens OX=9606 GN=NPTN PE=1 SV=2	5	0.0480275	0.568921	18.642	16.5971	17.5335	17.194	17.585	17.0832	17.2781	16.9095
	P63172	DYLT1_HUMAN Dynein light chain Tctex-type 1 OS=Homo sapiens OX=9606 GN=DYNLT1 PE=1 SV=1	2	0.00114314	0.562702	16.7916	16.0789	16.9091	15.6206	16.8026	15.9989	16.8061	16.2927
	P18615	NELFE_HUMAN Negative elongation factor E OS=Homo sapiens OX=9606 GN=NELFE PE=1 SV=3	3	0.042462	0.562121	17.2018	16.2313	16.6586	16.178	18.0233	16.6009	16.7699	16.3192
	P30043	BLVRB_HUMAN Flavin reductase (NADPH) OS=Homo sapiens OX=9606 GN=BLVRB PE=1 SV=3	6	0.0220643	0.559158	17.8781	16.9283	16.8324	16.6568	17.9803	16.8182	17.6038	16.5367
	O76031	CLPX_HUMAN ATP-dependent Clp protease ATP-binding subunit clpX-like, mitochondrial OS=Homo sapiens OX=9606 GN=CLPX PE=1 SV=2	4	0.0393305	0.558685	14.6754	13.8108	15.2109	14.3062	14.4017	14.3933	15.7231	14.1411
	Q2TAY7	SMU1_HUMAN WD40 repeat-containing protein SMU1 OS=Homo sapiens OX=9606 GN=SMU1 PE=1 SV=2	6	4.06602e-06	0.557752	17.687	16.7904	17.5919	16.8758	17.5399	16.6833	17.607	16.7071
	Q6Y7W6	GGYF2_HUMAN GRB10-interacting GYF protein 2 OS=Homo sapiens OX=9606 GN=GIGYF2 PE=1 SV=1	4	0.0497027	0.557523	17.5671	15.8279	16.049	16.1405	17.1976	16.1963	16.6314	15.9087
	P07196	NFL_HUMAN Neurofilament light polypeptide OS=Homo sapiens OX=9606 GN=NEFL PE=1 SV=3	1	0.0167348	0.556239	14.5201	13.89	14.1934	13.7002	14.0815	13.5384	15.1336	13.4151
	P49643	PRI2_HUMAN DNA primase large subunit OS=Homo sapiens OX=9606 GN=PRIM2 PE=1 SV=2	3	0.0375301	0.549151	15.505	13.9992	15.6559	15.2557	15.9688	14.8715	15.8162	15.3607
	P62888	RL30_HUMAN 60S ribosomal protein L30 OS=Homo sapiens OX=9606 GN=RPL30 PE=1 SV=2	3	0.0180568	0.544842	20.3185	18.6073	19.652	19.0992	19.37	19.3704	20.1497	18.9089
	O60488	ACSL4_HUMAN Long-chain-fatty-acid--CoA ligase 4 OS=Homo sapiens OX=9606 GN=ACSL4 PE=1 SV=2	12	0.0116364	0.544719	19.5905	18.2735	19.1397	17.749	18.9694	18.4526	18.9149	18.6339
	P49366	DHYS_HUMAN Deoxyhypusine synthase OS=Homo sapiens OX=9606 GN=DHPS PE=1 SV=1	4	0.0382067	0.542774	15.7656	15.1607	15.6829	14.188	15.0855	15.1325	15.5321	14.0587
	Q9Y4W6	AFG32_HUMAN AFG3-like protein 2 OS=Homo sapiens OX=9606 GN=AFG3L2 PE=1 SV=2	8	0.0408507	0.542709	17.0252	14.9874	16.0807	15.635	16.5676	15.3789	15.7529	15.8982
	Q9UPQ7	PZRN3_HUMAN E3 ubiquitin-protein ligase PDZRN3 OS=Homo sapiens OX=9606 GN=PDZRN3 PE=1 SV=2	3	0.00772432	0.541131	14.5209	14.1758	14.4715	13.7997	15.2986	13.6565	14.608	13.7234
	Q00534	CDK6_HUMAN Cyclin-dependent kinase 6 OS=Homo sapiens OX=9606 GN=CDK6 PE=1 SV=1	5	0.00035333	0.539551	15.5451	14.9684	15.7022	14.6454	15.8566	14.9561	15.9813	14.9547
	Q9P2R7	SUCB1_HUMAN Succinate--CoA ligase [ADP-forming] subunit beta, mitochondrial OS=Homo sapiens OX=9606 GN=SUCLA2 PE=1 SV=3	7	0.0361735	0.536207	17.3068	15.9628	16.1676	15.6729	17.3084	15.8412	16.1683	15.8775
	P07108	ACBP_HUMAN Acyl-CoA-binding protein OS=Homo sapiens OX=9606 GN=DBI PE=1 SV=2	3	0.00973195	0.535949	16.8581	16.4264	16.7888	15.8402	17.1836	16.4282	17.6536	16.1899
	Q13418	ILK_HUMAN Integrin-linked protein kinase OS=Homo sapiens OX=9606 GN=ILK PE=1 SV=2	6	0.0153971	0.53403	17.6976	16.7645	17.7064	16.459	17.711	16.5454	16.6733	16.3994
	O14976	GAK_HUMAN Cyclin-G-associated kinase OS=Homo sapiens OX=9606 GN=GAK PE=1 SV=2	6	0.0208305	0.532185	16.2611	15.2369	15.4069	14.9837	16.0755	14.9022	15.3794	14.3602
	O95361	TRI16_HUMAN Tripartite motif-containing protein 16 OS=Homo sapiens OX=9606 GN=TRIM16 PE=1 SV=3;sp	8	0.0154985	0.532071	16.3829	15.3035	15.7379	15.3845	15.6336	14.4519	15.8929	14.866
	P50897	PPT1_HUMAN Palmitoyl-protein thioesterase 1 OS=Homo sapiens OX=9606 GN=PPT1 PE=1 SV=1	6	0.0306966	0.529551	18.2503	16.396	17.0372	16.6297	17.3184	16.4991	16.8183	16.2308
	Q14318	FKBP8_HUMAN Peptidyl-prolyl cis-trans isomerase FKBP8 OS=Homo sapiens OX=9606 GN=FKBP8 PE=1 SV=2	2	0.00187612	0.525748	17.2496	16.5033	17.5328	16.5098	16.9481	16.4819	17.6198	16.1451
	Q01780	EXOSX_HUMAN Exosome component 10 OS=Homo sapiens OX=9606 GN=EXOSC10 PE=1 SV=2	5	0.0054577	0.524575	15.9179	14.5782	15.6646	15.3984	15.7938	15.1168	16.2648	14.8245
	Q9UKF6	CPSF3_HUMAN Cleavage and polyadenylation specificity factor subunit 3 OS=Homo sapiens OX=9606 GN=CPSF3 PE=1 SV=1	6	0.0153133	0.52441	17.6023	15.8808	16.5946	15.9445	16.9723	16.0054	16.3278	15.9414
	Q9NQT8	KI13B_HUMAN Kinesin-like protein KIF13B OS=Homo sapiens OX=9606 GN=KIF13B PE=1 SV=2	6	0.0146744	0.523841	15.3458	13.4143	14.4329	13.7728	14.7924	14.0836	14.2731	13.8423
	P62841	RS15_HUMAN 40S ribosomal protein S15 OS=Homo sapiens OX=9606 GN=RPS15 PE=1 SV=2	6	0.0271113	0.523464	20.1297	19.0535	19.4666	19.3165	20.8035	19.023	19.576	18.8474
	P03886	NU1M_HUMAN NADH-ubiquinone oxidoreductase chain 1 OS=Homo sapiens OX=9606 GN=MT-ND1 PE=1 SV=1	2	0.0247195	0.52265	15.5934	15.1455	16.0543	14.4229	15.4435	15.4314	16.4338	14.7807
	Q15648	MED1_HUMAN Mediator of RNA polymerase II transcription subunit 1 OS=Homo sapiens OX=9606 GN=MED1 PE=1 SV=4	2	0.00341279	0.522372	14.6201	13.4706	13.9594	13.2303	14.6893	13.3519	14.0411	13.5097
	P28331	NDUS1_HUMAN NADH-ubiquinone oxidoreductase 75 kDa subunit, mitochondrial OS=Homo sapiens OX=9606 GN=NDUFS1 PE=1 SV=3	12	6.36165e-05	0.519994	17.6259	16.3271	17.4071	16.5694	17.3351	16.6683	17.434	16.4635
	O14777	NDC80_HUMAN Kinetochore protein NDC80 homolog OS=Homo sapiens OX=9606 GN=NDC80 PE=1 SV=1	2	4.45359e-05	0.518887	16.2518	15.1382	16.1863	15.4798	16.2902	15.418	16.4297	15.336
	O14773	TPP1_HUMAN Tripeptidyl-peptidase 1 OS=Homo sapiens OX=9606 GN=TPP1 PE=1 SV=2	5	0.00235782	0.517216	17.0377	15.6707	17.1107	15.9014	16.5732	16.2917	16.7037	15.7569
	P45973	CBX5_HUMAN Chromobox protein homolog 5 OS=Homo sapiens OX=9606 GN=CBX5 PE=1 SV=1	6	0.00018482	0.517036	17.5624	16.376	17.0638	16.185	17.1895	16.3419	17.2996	16.4057
	Q8N543	OGFD1_HUMAN Prolyl 3-hydroxylase OGFOD1 OS=Homo sapiens OX=9606 GN=OGFOD1 PE=1 SV=1	8	0.0140556	0.507048	16.4343	14.7901	16.1353	15.3301	16.7171	15.4719	15.5852	15.3605
	Q7Z6J6	FRMD5_HUMAN FERM domain-containing protein 5 OS=Homo sapiens OX=9606 GN=FRMD5 PE=1 SV=1	3	0.0421134	0.499197	14.4121	13.7141	15.6721	14.583	15.2667	14.702	15.2657	13.6083
	O43504	LTOR5_HUMAN Ragulator complex protein LAMTOR5 OS=Homo sapiens OX=9606 GN=LAMTOR5 PE=1 SV=1	3	0.0315748	0.498229	18.8209	17.3885	17.3726	16.9884	18.0595	16.8264	17.5857	16.615
	Q92597	NDRG1_HUMAN Protein NDRG1 OS=Homo sapiens OX=9606 GN=NDRG1 PE=1 SV=1	9	0.000115862	0.495467	19.9028	18.5825	19.6038	18.7298	19.7145	19.0151	19.8598	18.7008
	Q9H9J2	RM44_HUMAN 39S ribosomal protein L44, mitochondrial OS=Homo sapiens OX=9606 GN=MRPL44 PE=1 SV=1	5	0.000969103	0.492607	16.9884	16.4063	16.8264	15.8538	16.9804	15.8472	17.0385	15.6404
	Q14444	CAPR1_HUMAN Caprin-1 OS=Homo sapiens OX=9606 GN=CAPRIN1 PE=1 SV=2	8	0.0308262	0.491318	19.8116	18.2883	18.5713	18.2252	19.9449	18.249	18.6765	18.1408
	Q9BWJ5	SF3B5_HUMAN Splicing factor 3B subunit 5 OS=Homo sapiens OX=9606 GN=SF3B5 PE=1 SV=1	3	0.0268337	0.489798	16.9862	15.2636	16.7087	16.0401	16.4156	16.5647	17.2585	15.3817
	Q3V6T2	GRDN_HUMAN Girdin OS=Homo sapiens OX=9606 GN=CCDC88A PE=1 SV=2	5	0.046253	0.486854	15.8311	14.5876	15.3941	14.7299	15.5701	14.7941	14.7847	13.3146
	P12694	ODBA_HUMAN 2-oxoisovalerate dehydrogenase subunit alpha, mitochondrial OS=Homo sapiens OX=9606 GN=BCKDHA PE=1 SV=2	3	0.0359708	0.484232	16.4104	14.1932	15.4131	14.2381	15.4766	14.4174	14.7997	15.066
	Q9UBB4	ATX10_HUMAN Ataxin-10 OS=Homo sapiens OX=9606 GN=ATXN10 PE=1 SV=1	6	0.0491372	0.483635	16.1918	15.4719	15.5235	14.7919	17.231	15.6358	16.8207	15.6752
	P07858	CATB_HUMAN Cathepsin B OS=Homo sapiens OX=9606 GN=CTSB PE=1 SV=3	6	0.00237602	0.482145	19.393	17.6352	18.7078	18.1519	18.7023	17.9608	18.7928	17.638
	P30876	RPB2_HUMAN DNA-directed RNA polymerase II subunit RPB2 OS=Homo sapiens OX=9606 GN=POLR2B PE=1 SV=1	13	0.000239806	0.481217	16.6709	15.6323	16.4703	15.8308	16.8051	15.2704	16.6523	15.6442
	P25398	RS12_HUMAN 40S ribosomal protein S12 OS=Homo sapiens OX=9606 GN=RPS12 PE=1 SV=3	4	0.0180393	0.480501	19.7109	18.6817	18.8897	18.5708	20.4093	18.7651	19.5411	18.3039
	P49841	GSK3B_HUMAN Glycogen synthase kinase-3 beta OS=Homo sapiens OX=9606 GN=GSK3B PE=1 SV=2	3	0.0127544	0.480161	17.8438	15.6122	16.6502	16.2119	17.0195	16.1393	16.7586	16.0752
	Q8IYS1	P20D2_HUMAN Peptidase M20 domain-containing protein 2 OS=Homo sapiens OX=9606 GN=PM20D2 PE=1 SV=2	4	0.0393523	0.479629	13.4904	13.0066	14.3981	13.5615	14.7227	13.7859	14.4091	12.4262
	Q13308	PTK7_HUMAN Inactive tyrosine-protein kinase 7 OS=Homo sapiens OX=9606 GN=PTK7 PE=1 SV=2	2	0.0143057	0.476646	15.8681	13.734	15.6609	14.8689	15.1983	14.8941	15.352	14.3062
	Q15208	STK38_HUMAN Serine/threonine-protein kinase 38 OS=Homo sapiens OX=9606 GN=STK38 PE=1 SV=1	4	0.0146363	0.475155	14.1926	13.7117	14.9106	13.6976	15.5372	14.2469	15.2428	13.9329
	O14929	HAT1_HUMAN Histone acetyltransferase type B catalytic subunit OS=Homo sapiens OX=9606 GN=HAT1 PE=1 SV=1	9	0.0178834	0.473511	15.729	15.4381	16.931	15.3806	17.2141	15.4521	16.3982	15.6873
	Q86UE4	LYRIC_HUMAN Protein LYRIC OS=Homo sapiens OX=9606 GN=MTDH PE=1 SV=2	8	0.0252575	0.473114	18.2518	16.1312	18.0141	16.4654	16.9364	16.9185	17.7693	17.1375
	P30049	ATPD_HUMAN ATP synthase subunit delta, mitochondrial OS=Homo sapiens OX=9606 GN=ATP5F1D PE=1 SV=2	2	0.0284053	0.468656	17.336	15.8512	16.5171	16.1438	16.7244	16.4109	18.1162	15.9142
	Q16718	NDUA5_HUMAN NADH dehydrogenase [ubiquinone] 1 alpha subcomplex subunit 5 OS=Homo sapiens OX=9606 GN=NDUFA5 PE=1 SV=3	5	0.00119845	0.463946	17.2981	15.8265	16.9527	16.2015	17.04	16.4447	17.5364	15.9227
	O43290	SNUT1_HUMAN U4/U6.U5 tri-snRNP-associated protein 1 OS=Homo sapiens OX=9606 GN=SART1 PE=1 SV=1	5	0.0339485	0.463856	17.7523	15.9112	15.9788	15.4104	17.0679	15.6658	16.3682	15.7467
	P34949	MPI_HUMAN Mannose-6-phosphate isomerase OS=Homo sapiens OX=9606 GN=MPI PE=1 SV=2	8	0.00151719	0.459294	16.8739	16.0534	16.5129	15.8158	17.2511	15.7841	16.8943	15.3889
	P35240	MERL_HUMAN Merlin OS=Homo sapiens OX=9606 GN=NF2 PE=1 SV=1	6	0.0100522	0.458721	16.7369	14.9262	16.6765	15.8825	17.0985	16.121	17.0377	16.1225
	P21291	CSRP1_HUMAN Cysteine and glycine-rich protein 1 OS=Homo sapiens OX=9606 GN=CSRP1 PE=1 SV=3	9	0.0145342	0.452312	19.5785	17.9865	18.7194	18.4578	19.6909	18.2835	18.7798	17.4624
	O94915	FRYL_HUMAN Protein furry homolog-like OS=Homo sapiens OX=9606 GN=FRYL PE=1 SV=2	12	0.0220531	0.451745	16.9062	15.5051	15.5887	15.4659	17.0946	15.5399	16.3686	14.8615
	Q01581	HMCS1_HUMAN Hydroxymethylglutaryl-CoA synthase, cytoplasmic OS=Homo sapiens OX=9606 GN=HMGCS1 PE=1 SV=2	2	0.00982336	0.442761	14.6313	13.6197	15.122	14.6876	15.4827	13.6188	15.0614	13.6697
	Q96DZ1	ERLEC_HUMAN Endoplasmic reticulum lectin 1 OS=Homo sapiens OX=9606 GN=ERLEC1 PE=1 SV=1	5	0.0143681	0.441468	15.7749	13.472	15.0996	14.7261	15.7146	14.4589	15.6171	14.8307
	Q96G01	BICD1_HUMAN Protein bicaudal D homolog 1 OS=Homo sapiens OX=9606 GN=BICD1 PE=1 SV=3	2	0.0131	0.433237	17.0355	15.7084	16.0601	15.4075	16.1346	15.059	16.2531	14.4813
	Q27J81	INF2_HUMAN Inverted formin-2 OS=Homo sapiens OX=9606 GN=INF2 PE=1 SV=2	7	0.0487955	0.430901	16.5284	14.6257	14.9214	14.9785	16.6419	14.1125	15.0768	14.5935
	P68036	UB2L3_HUMAN Ubiquitin-conjugating enzyme E2 L3 OS=Homo sapiens OX=9606 GN=UBE2L3 PE=1 SV=1;sp	5	0.014786	0.413724	16.6177	16.6204	17.5608	15.4243	17.1925	16.3399	17.6488	15.5421
	P04040	CATA_HUMAN Catalase OS=Homo sapiens OX=9606 GN=CAT PE=1 SV=3	13	0.002173	0.409076	18.6037	17.0244	17.7125	16.9701	18.3585	16.7059	17.7293	16.5454
	Q9UH99	SUN2_HUMAN SUN domain-containing protein 2 OS=Homo sapiens OX=9606 GN=SUN2 PE=1 SV=3	6	0.043717	0.407604	15.313	14.8069	15.7559	15.1385	15.2149	13.7694	15.5915	12.9814
	Q14116	IL18_HUMAN Interleukin-18 OS=Homo sapiens OX=9606 GN=IL18 PE=1 SV=1	2	0.0188969	0.405333	18.1612	16.5254	17.6059	15.7531	18.1866	16.5534	16.6623	16.5729
	Q92896	GSLG1_HUMAN Golgi apparatus protein 1 OS=Homo sapiens OX=9606 GN=GLG1 PE=1 SV=2	17	0.00449635	0.402037	17.0116	15.2075	16.3243	15.313	17.4016	15.7019	16.2537	15.5104
	P04271	S100B_HUMAN Protein S100-B OS=Homo sapiens OX=9606 GN=S100B PE=1 SV=2	3	0.0152198	0.4019	17.9295	16.7389	17.544	16.3928	17.3401	16.6216	17.3481	15.1481
	O95239	KIF4A_HUMAN Chromosome-associated kinesin KIF4A OS=Homo sapiens OX=9606 GN=KIF4A PE=1 SV=3	10	0.0339313	0.399961	15.5858	15.5959	17.8346	15.1398	16.6711	15.3896	16.3616	15.0396
	P04179	SODM_HUMAN Superoxide dismutase [Mn], mitochondrial OS=Homo sapiens OX=9606 GN=SOD2 PE=1 SV=3	4	0.0201465	0.397727	18.7114	16.9814	18.1205	15.9216	17.507	16.977	18.4008	17.5391
	Q3KQU3	MA7D1_HUMAN MAP7 domain-containing protein 1 OS=Homo sapiens OX=9606 GN=MAP7D1 PE=1 SV=1	4	0.0455942	0.395226	17.2963	14.8233	15.5335	14.7574	16.7907	14.9434	15.0205	14.7599
	P50479	PDLI4_HUMAN PDZ and LIM domain protein 4 OS=Homo sapiens OX=9606 GN=PDLIM4 PE=1 SV=2	4	0.0178665	0.394815	18.9515	16.4065	17.1728	16.6657	17.6007	17.0455	18.3001	16.5446
	Q9UBG0	MRC2_HUMAN C-type mannose receptor 2 OS=Homo sapiens OX=9606 GN=MRC2 PE=1 SV=2	17	0.00278426	0.393897	17.2004	15.5176	16.5734	16.2955	17.4958	15.9184	17.3702	15.5318
	Q7L2E3	DHX30_HUMAN ATP-dependent RNA helicase DHX30 OS=Homo sapiens OX=9606 GN=DHX30 PE=1 SV=1	10	0.0185571	0.393332	16.0143	14.4529	15.636	14.3994	16.1042	14.621	14.6216	13.5181
	P11717	MPRI_HUMAN Cation-independent mannose-6-phosphate receptor OS=Homo sapiens OX=9606 GN=IGF2R PE=1 SV=3	16	0.0237449	0.392689	18.4298	16.7181	16.6281	15.9264	17.4228	15.9834	17.1284	15.587
	Q5M775	CYTSB_HUMAN Cytospin-B OS=Homo sapiens OX=9606 GN=SPECC1 PE=1 SV=1	12	0.0294822	0.389896	17.6239	16.8462	17.2172	15.4791	18.042	15.4978	16.3783	16.0029
	Q8NHP8	PLBL2_HUMAN Putative phospholipase B-like 2 OS=Homo sapiens OX=9606 GN=PLBD2 PE=1 SV=2	4	0.0192841	0.386741	14.9043	14.2308	15.2719	13.819	14.7104	14.4057	16.1796	13.1285
	Q6DKI1	RL7L_HUMAN 60S ribosomal protein L7-like 1 OS=Homo sapiens OX=9606 GN=RPL7L1 PE=1 SV=2	3	0.0342373	0.386398	15.6253	13.0349	15.8107	15.365	15.4914	14.7164	15.7116	14.0353
	P0DPI2	GAL3A_HUMAN Glutamine amidotransferase-like class 1 domain-containing protein 3A, mitochondrial OS=Homo sapiens OX=9606 GN=GATD3A PE=1 SV=1;sp	5	0.00337917	0.385278	17.4343	16.0758	16.7334	15.858	17.0526	16.2014	17.8175	15.3985
	Q9UBU8	MO4L1_HUMAN Mortality factor 4-like protein 1 OS=Homo sapiens OX=9606 GN=MORF4L1 PE=1 SV=2	3	0.0219412	0.381877	16.6974	15.227	15.922	14.8372	17.1272	14.5513	15.1823	14.758
	Q9BWM7	SFXN3_HUMAN Sideroflexin-3 OS=Homo sapiens OX=9606 GN=SFXN3 PE=1 SV=3	6	0.0216531	0.381345	18.0293	15.6957	16.1023	16.071	17.5837	15.9161	16.8651	15.3343
	Q9BTE6	AASD1_HUMAN Alanyl-tRNA editing protein Aarsd1 OS=Homo sapiens OX=9606 GN=AARSD1 PE=1 SV=2	4	0.00315835	0.378646	16.4025	14.1443	16.2727	15.2643	16.435	15.4331	16.5	15.1642
	Q8WXA3	RUFY2_HUMAN RUN and FYVE domain-containing protein 2 OS=Homo sapiens OX=9606 GN=RUFY2 PE=1 SV=3	3	0.0173876	0.378134	16.1953	13.9366	15.6626	13.839	14.6159	13.4407	14.5775	14.2229
	P78347	GTF2I_HUMAN General transcription factor II-I OS=Homo sapiens OX=9606 GN=GTF2I PE=1 SV=2	10	0.00324034	0.377197	18.2426	16.1465	17.9579	16.8316	18.1027	16.1478	17.2053	16.7562
	P30530	UFO_HUMAN Tyrosine-protein kinase receptor UFO OS=Homo sapiens OX=9606 GN=AXL PE=1 SV=4	5	0.000765244	0.375153	16.7105	15.4703	16.5889	14.7495	16.0338	15.0675	16.3701	14.7582
	Q9Y697	NFS1_HUMAN Cysteine desulfurase, mitochondrial OS=Homo sapiens OX=9606 GN=NFS1 PE=1 SV=3	2	0.0295325	0.371798	15.9215	13.2998	16.1408	14.2916	14.9571	13.9974	15.6551	15.3761
	Q9UGV2	NDRG3_HUMAN Protein NDRG3 OS=Homo sapiens OX=9606 GN=NDRG3 PE=1 SV=2	6	0.0458353	0.370391	16.4172	13.6475	16.2899	13.8539	15.8944	15.9095	15.8641	15.3232
	P46013	KI67_HUMAN Proliferation marker protein Ki-67 OS=Homo sapiens OX=9606 GN=MKI67 PE=1 SV=2	44	0.00365418	0.370188	18.2874	15.9422	17.1908	16.136	17.8282	16.5248	17.0762	16.0447
	P49005	DPOD2_HUMAN DNA polymerase delta subunit 2 OS=Homo sapiens OX=9606 GN=POLD2 PE=1 SV=1	3	0.0148953	0.368647	15.9029	14.7099	15.3796	14.7323	15.2637	13.3575	15.3259	13.3137
	Q9Y6E2	BZW2_HUMAN Basic leucine zipper and W2 domain-containing protein 2 OS=Homo sapiens OX=9606 GN=BZW2 PE=1 SV=1	3	0.0251843	0.366555	17.5885	16.2733	16.3224	15.0939	16.4389	15.2495	16.4527	14.3941
	Q9BZF9	UACA_HUMAN Uveal autoantigen with coiled-coil domains and ankyrin repeats OS=Homo sapiens OX=9606 GN=UACA PE=1 SV=2	9	0.0492606	0.366397	14.9459	14.5228	16.7806	14.4943	16.1634	13.5008	14.4444	14.0222
	O75153	CLU_HUMAN Clustered mitochondria protein homolog OS=Homo sapiens OX=9606 GN=CLUH PE=1 SV=2	9	0.0235342	0.365945	16.905	14.6058	17.2803	15.7505	17.7291	16.0789	16.0424	15.7204
	P42892	ECE1_HUMAN Endothelin-converting enzyme 1 OS=Homo sapiens OX=9606 GN=ECE1 PE=1 SV=2	6	0.00503512	0.362231	17.8394	16.1542	16.9156	15.6905	17.2747	16.4048	17.213	15.133
	P62942	FKB1A_HUMAN Peptidyl-prolyl cis-trans isomerase FKBP1A OS=Homo sapiens OX=9606 GN=FKBP1A PE=1 SV=2	4	0.0205225	0.361538	16.9306	13.9982	15.7497	15.6369	16.4735	15.5424	16.3773	14.4825
	Q9NUQ3	TXLNG_HUMAN Gamma-taxilin OS=Homo sapiens OX=9606 GN=TXLNG PE=1 SV=2	2	0.0122563	0.357556	15.6402	14.0481	15.1742	14.339	16.2792	13.1862	14.8854	14.4707
	P50895	BCAM_HUMAN Basal cell adhesion molecule OS=Homo sapiens OX=9606 GN=BCAM PE=1 SV=2	8	0.0222387	0.356299	15.8986	14.4498	16.4641	13.2298	15.9656	15.2439	15.5432	14.9925
	P82921	RT21_HUMAN 28S ribosomal protein S21, mitochondrial OS=Homo sapiens OX=9606 GN=MRPS21 PE=1 SV=3	2	0.0176942	0.355697	15.175	14.5406	14.9331	13.9774	16.404	14.049	15.0715	13.0515
	O95819	M4K4_HUMAN Mitogen-activated protein kinase kinase kinase kinase 4 OS=Homo sapiens OX=9606 GN=MAP4K4 PE=1 SV=2	3	0.00725404	0.355133	17.3331	14.697	16.0997	15.3741	16.8344	15.2172	15.8461	14.8506
	Q9BZE1	RM37_HUMAN 39S ribosomal protein L37, mitochondrial OS=Homo sapiens OX=9606 GN=MRPL37 PE=1 SV=2	5	0.0107174	0.352868	16.3004	15.3721	17.1248	15.3492	16.1691	15.0088	16.0896	13.9425
	Q9UHL4	DPP2_HUMAN Dipeptidyl peptidase 2 OS=Homo sapiens OX=9606 GN=DPP7 PE=1 SV=3	8	0.00824271	0.352403	17.4603	15.3976	16.9539	14.5269	16.4912	16.0947	16.8229	15.6902
	P13995	MTDC_HUMAN Bifunctional methylenetetrahydrofolate dehydrogenase/cyclohydrolase, mitochondrial OS=Homo sapiens OX=9606 GN=MTHFD2 PE=1 SV=2	4	0.00409968	0.35204	16.4177	13.7624	15.9779	15.2794	16.1682	14.8267	16.162	14.8324
	Q9BRK5	CAB45_HUMAN 45 kDa calcium-binding protein OS=Homo sapiens OX=9606 GN=SDF4 PE=1 SV=1	8	0.000441509	0.34759	18.2507	16.2372	17.5272	16.4121	18.0621	16.6208	17.5641	16.0357
	P05067	A4_HUMAN Amyloid-beta precursor protein OS=Homo sapiens OX=9606 GN=APP PE=1 SV=3	5	0.00515335	0.345398	16.1391	13.8352	15.0624	14.3218	16.1417	13.7662	15.5282	14.8135
	O43663	PRC1_HUMAN Protein regulator of cytokinesis 1 OS=Homo sapiens OX=9606 GN=PRC1 PE=1 SV=2	4	0.00775122	0.341323	15.4763	13.5081	14.7965	13.5152	15.5655	13.6484	13.995	12.9585
	Q16763	UBE2S_HUMAN Ubiquitin-conjugating enzyme E2 S OS=Homo sapiens OX=9606 GN=UBE2S PE=1 SV=2	2	0.0115678	0.339798	16.2113	14.8662	15.6239	15.0061	17.617	15.1187	16.3607	14.5929
	O60826	CCD22_HUMAN Coiled-coil domain-containing protein 22 OS=Homo sapiens OX=9606 GN=CCDC22 PE=1 SV=1	4	0.0154921	0.334558	14.5272	14.6978	15.8733	13.5715	16.491	14.0021	15.6711	13.9726
	O14531	DPYL4_HUMAN Dihydropyrimidinase-related protein 4 OS=Homo sapiens OX=9606 GN=DPYSL4 PE=1 SV=2	4	0.0216486	0.334183	15.5099	14.0881	15.8796	13.4413	16.0066	13.5992	13.8687	13.8112
	Q9H1E5	TMX4_HUMAN Thioredoxin-related transmembrane protein 4 OS=Homo sapiens OX=9606 GN=TMX4 PE=1 SV=1	2	0.0295202	0.33176	16.9773	13.4152	15.8876	14.6733	16.1628	14.9845	14.8187	14.4063
	P82933	RT09_HUMAN 28S ribosomal protein S9, mitochondrial OS=Homo sapiens OX=9606 GN=MRPS9 PE=1 SV=2	7	0.018205	0.329185	16.6198	14.5401	15.7905	13.2805	16.2238	15.4683	15.7071	14.6403
	P16333	NCK1_HUMAN Cytoplasmic protein NCK1 OS=Homo sapiens OX=9606 GN=NCK1 PE=1 SV=1	2	0.0418264	0.321019	16.3912	14.1574	15.3217	13.2407	15.6826	13.2143	13.6029	13.829
	P09001	RM03_HUMAN 39S ribosomal protein L3, mitochondrial OS=Homo sapiens OX=9606 GN=MRPL3 PE=1 SV=1	4	0.0102542	0.315664	16.8277	15.1685	16.2617	15.7304	16.2553	13.7597	16.387	14.419
	O95340	PAPS2_HUMAN Bifunctional 3-phosphoadenosine 5-phosphosulfate synthase 2 OS=Homo sapiens OX=9606 GN=PAPSS2 PE=1 SV=2	2	0.00323556	0.312338	13.7023	13.106	15.0461	13.1993	15.2597	12.9111	14.7744	12.8508
	P19387	RPB3_HUMAN DNA-directed RNA polymerase II subunit RPB3 OS=Homo sapiens OX=9606 GN=POLR2C PE=1 SV=2	6	0.0034435	0.31105	15.9217	14.9075	16.1896	13.9737	16.5728	15.0861	17.0641	15.0417
	Q9UJW0	DCTN4_HUMAN Dynactin subunit 4 OS=Homo sapiens OX=9606 GN=DCTN4 PE=1 SV=1	2	0.0485032	0.309146	17.6959	14.4062	15.1691	15.5113	15.3842	13.8098	16.337	14.0844
	O15056	SYNJ2_HUMAN Synaptojanin-2 OS=Homo sapiens OX=9606 GN=SYNJ2 PE=1 SV=3	8	0.0196322	0.308153	17.2697	13.7555	15.902	14.4039	15.4722	14.3536	14.8244	14.162
	Q9BYD3	RM04_HUMAN 39S ribosomal protein L4, mitochondrial OS=Homo sapiens OX=9606 GN=MRPL4 PE=1 SV=1	7	0.00256507	0.304457	17.6495	16.1354	16.8694	15.2697	16.9786	15.367	16.8618	14.7245
	Q9Y2S7	PDIP2_HUMAN Polymerase delta-interacting protein 2 OS=Homo sapiens OX=9606 GN=POLDIP2 PE=1 SV=1	4	0.0032637	0.290722	17.5839	15.0883	16.1966	15.3682	17.0803	15.492	16.6577	14.4408
	Q06481	APLP2_HUMAN Amyloid-like protein 2 OS=Homo sapiens OX=9606 GN=APLP2 PE=1 SV=2	3	0.000762219	0.285559	15.6447	13.6863	15.3416	13.4687	14.4985	13.1019	15.5391	13.5345
	Q15582	BGH3_HUMAN Transforming growth factor-beta-induced protein ig-h3 OS=Homo sapiens OX=9606 GN=TGFBI PE=1 SV=1	4	0.000873293	0.285161	15.3825	13.2515	15.9757	13.7265	15.2967	14.3681	15.9387	14.0069
	Q12888	TP53B_HUMAN TP53-binding protein 1 OS=Homo sapiens OX=9606 GN=TP53BP1 PE=1 SV=2	16	0.0208478	0.284885	18.0316	14.4964	16.0329	15.639	17.5499	15.7896	16.2814	14.7245
	Q6UXV4	MIC27_HUMAN MICOS complex subunit MIC27 OS=Homo sapiens OX=9606 GN=APOOL PE=1 SV=1	3	0.0192145	0.283722	17.5436	13.7568	15.5934	15.5386	17.0391	14.9255	16.1632	14.8487
	Q8ND82	Z280C_HUMAN Zinc finger protein 280C OS=Homo sapiens OX=9606 GN=ZNF280C PE=1 SV=1	2	0.0196888	0.283011	15.1829	13.5869	13.6824	11.4524	14.0828	12.4818	13.7566	11.8994
	P13591	NCAM1_HUMAN Neural cell adhesion molecule 1 OS=Homo sapiens OX=9606 GN=NCAM1 PE=1 SV=3	4	0.0334264	0.282797	16.8943	13.8447	14.3249	12.9229	14.7872	13.3721	15.8839	14.4619
	Q8NF91	SYNE1_HUMAN Nesprin-1 OS=Homo sapiens OX=9606 GN=SYNE1 PE=1 SV=4	4	0.0227672	0.281594	17.1071	14.6782	16.1002	13.7703	15.8818	13.6547	14.4129	14.0855
	Q9GZP4	PITH1_HUMAN PITH domain-containing protein 1 OS=Homo sapiens OX=9606 GN=PITHD1 PE=1 SV=1	5	0.039085	0.266155	17.2855	14.6778	15.1126	15.234	18.0009	15.2152	16.1161	13.7493
	P32322	P5CR1_HUMAN Pyrroline-5-carboxylate reductase 1, mitochondrial OS=Homo sapiens OX=9606 GN=PYCR1 PE=1 SV=2	4	0.0087692	0.265781	17.8194	14.2717	16.2559	14.6129	16.1094	14.7656	15.534	14.4217
	P26358	DNMT1_HUMAN DNA (cytosine-5)-methyltransferase 1 OS=Homo sapiens OX=9606 GN=DNMT1 PE=1 SV=2	6	0.00397832	0.250068	16.651	14.6742	16.1312	13.0951	15.4594	13.9529	15.3734	13.8943
	O60462	NRP2_HUMAN Neuropilin-2 OS=Homo sapiens OX=9606 GN=NRP2 PE=1 SV=3	6	0.0396406	0.247785	16.92	13.6711	14.0536	14.3707	17.4017	13.7225	15.8356	14.3952
	P49406	RM19_HUMAN 39S ribosomal protein L19, mitochondrial OS=Homo sapiens OX=9606 GN=MRPL19 PE=1 SV=2	3	0.000145255	0.246823	16.0944	13.5061	15.4153	13.7068	16.0599	13.6536	15.6598	14.2891
	Q86TG7	PEG10_HUMAN Retrotransposon-derived protein PEG10 OS=Homo sapiens OX=9606 GN=PEG10 PE=1 SV=2	7	0.00390319	0.237429	18.5015	16.2105	18.0913	16.4306	19.7233	16.3297	17.6659	16.7134
	Q8NBT2	SPC24_HUMAN Kinetochore protein Spc24 OS=Homo sapiens OX=9606 GN=SPC24 PE=1 SV=2	4	0.00637382	0.236572	17.4152	13.9907	16.4058	13.849	15.6607	14.9779	15.5455	13.891
	P16144	ITB4_HUMAN Integrin beta-4 OS=Homo sapiens OX=9606 GN=ITGB4 PE=1 SV=5	13	0.00270383	0.235755	16.95	15.2924	16.5558	14.5503	16.6017	14.6821	16.1625	13.4066
	Q9BY32	ITPA_HUMAN Inosine triphosphate pyrophosphatase OS=Homo sapiens OX=9606 GN=ITPA PE=1 SV=2	5	0.0417061	0.233752	17.2938	15.3644	16.7498	16.7345	17.3666	12.9118	17.4139	15.4256
	P20290	BTF3_HUMAN Transcription factor BTF3 OS=Homo sapiens OX=9606 GN=BTF3 PE=1 SV=1	5	0.012186	0.232395	18.8588	17.677	18.1242	15.5584	19.9508	17.1773	19.0552	17.1549
	Q9UPT9	UBP22_HUMAN Ubiquitin carboxyl-terminal hydrolase 22 OS=Homo sapiens OX=9606 GN=USP22 PE=1 SV=2	2	0.000175958	0.230719	16.6983	14.4375	16.8516	13.9964	16.6787	14.9457	16.7348	15.1206
	P09486	SPRC_HUMAN SPARC OS=Homo sapiens OX=9606 GN=SPARC PE=1 SV=1	6	0.0472814	0.23016	17.5105	16.1547	18.2184	13.6141	18.0031	16.8889	18.6427	17.2397
	Q12849	GRSF1_HUMAN G-rich sequence factor 1 OS=Homo sapiens OX=9606 GN=GRSF1 PE=1 SV=3	4	0.00582291	0.227937	17.6131	14.2725	15.8198	14.4711	16.9794	15.0379	15.7851	13.8827
	Q9Y5S2	MRCKB_HUMAN Serine/threonine-protein kinase MRCK beta OS=Homo sapiens OX=9606 GN=CDC42BPB PE=1 SV=2	10	0.0049705	0.224753	15.8127	13.4756	16.6461	13.5354	14.5971	12.8641	14.8104	13.3768
	P12109	CO6A1_HUMAN Collagen alpha-1(VI) chain OS=Homo sapiens OX=9606 GN=COL6A1 PE=1 SV=3	12	0.0017739	0.222083	18.4587	16.7709	18.0888	16.3569	18.526	16.6872	18.4943	15.0696
	Q9GZS3	WDR61_HUMAN WD repeat-containing protein 61 OS=Homo sapiens OX=9606 GN=WDR61 PE=1 SV=1	5	0.0108295	0.221048	17.5205	14.4814	16.0015	14.6616	17.8911	14.4426	15.4013	14.5187
	Q96SB4	SRPK1_HUMAN SRSF protein kinase 1 OS=Homo sapiens OX=9606 GN=SRPK1 PE=1 SV=2	4	0.0246627	0.216256	15.9077	13.7933	16.8083	15.8059	16.8467	15.4785	17.2957	12.9439
	Q02818	NUCB1_HUMAN Nucleobindin-1 OS=Homo sapiens OX=9606 GN=NUCB1 PE=1 SV=4	10	0.00104148	0.207492	18.4735	14.6738	17.5397	16.0102	17.8503	16.0749	17.8092	15.8384
	Q99715	COCA1_HUMAN Collagen alpha-1(XII) chain OS=Homo sapiens OX=9606 GN=COL12A1 PE=1 SV=2	7	0.000746621	0.206862	16.9516	13.5764	15.6678	14.0225	16.6367	14.0622	15.617	14.1189
	Q9Y4W2	LAS1L_HUMAN Ribosomal biogenesis protein LAS1L OS=Homo sapiens OX=9606 GN=LAS1L PE=1 SV=2	4	0.00402698	0.203506	16.7516	14.7777	16.4834	13.3589	14.976	13.6478	16.4106	13.6497
	P02795	MT2_HUMAN Metallothionein-2 OS=Homo sapiens OX=9606 GN=MT2A PE=1 SV=1	2	0.0070596	0.195884	16.7228	14.0139	14.5632	13.1805	17.0443	14.0445	16.1716	13.8552
	Q96C36	P5CR2_HUMAN Pyrroline-5-carboxylate reductase 2 OS=Homo sapiens OX=9606 GN=PYCR2 PE=1 SV=1	4	0.00726775	0.191071	17.6554	15.6105	16.9956	15.609	16.9761	13.4041	16.6058	14.058
	P24821	TENA_HUMAN Tenascin OS=Homo sapiens OX=9606 GN=TNC PE=1 SV=3	7	0.00026025	0.189258	16.6566	13.5079	15.6161	13.0716	15.9785	13.6632	15.489	13.8914
	P23921	RIR1_HUMAN Ribonucleoside-diphosphate reductase large subunit OS=Homo sapiens OX=9606 GN=RRM1 PE=1 SV=1	7	8.93203e-05	0.187995	16.4907	14.9035	17.1507	14.0186	16.4984	14.4307	16.9936	14.1356
	Q8WYA6	CTBL1_HUMAN Beta-catenin-like protein 1 OS=Homo sapiens OX=9606 GN=CTNNBL1 PE=1 SV=1	4	0.00576328	0.180204	16.4304	14.0737	14.8155	13.4389	17.527	13.7581	15.7883	13.4012
	O95168	NDUB4_HUMAN NADH dehydrogenase [ubiquinone] 1 beta subcomplex subunit 4 OS=Homo sapiens OX=9606 GN=NDUFB4 PE=1 SV=3	2	0.0397073	0.174264	17.0876	15.0466	17.9339	17.38	17.0597	13.2513	17.251	13.5717
	O43847	NRDC_HUMAN Nardilysin OS=Homo sapiens OX=9606 GN=NRDC PE=1 SV=3	7	0.000328776	0.172423	16.4637	14.1562	16.4753	13.8385	16.0077	13.4921	15.5745	12.8905
	Q13015	AF1Q_HUMAN Protein AF1q OS=Homo sapiens OX=9606 GN=MLLT11 PE=1 SV=1	3	0.00116472	0.168941	16.4872	13.7786	14.8833	13.7122	16.0001	13.0394	16.7099	13.2887
	P37198	NUP62_HUMAN Nuclear pore glycoprotein p62 OS=Homo sapiens OX=9606 GN=NUP62 PE=1 SV=3	3	0.011423	0.167665	17.9931	13.741	16.6264	13.7858	17.4684	15.7505	17.7359	16.2411
	Q05707	COEA1_HUMAN Collagen alpha-1(XIV) chain OS=Homo sapiens OX=9606 GN=COL14A1 PE=1 SV=3	7	0.000449832	0.15682	16.8811	14.4119	17.0563	13.2609	17.0119	15.1192	16.8846	14.3507
	Q02241	KIF23_HUMAN Kinesin-like protein KIF23 OS=Homo sapiens OX=9606 GN=KIF23 PE=1 SV=3	7	4.49635e-05	0.154869	16.8887	14.0503	16.2726	13.6537	16.3226	13.188	16.072	13.9003
	Q9Y4C2	TCAF1_HUMAN TRPM8 channel-associated factor 1 OS=Homo sapiens OX=9606 GN=TCAF1 PE=1 SV=3	9	0.000297982	0.152596	17.0265	14.2495	17.2484	15.2819	17.2114	14.338	16.8154	13.5836
	O60869	EDF1_HUMAN Endothelial differentiation-related factor 1 OS=Homo sapiens OX=9606 GN=EDF1 PE=1 SV=1	2	0.0453827	0.152077	19.1852	13.7807	18.4535	18.0713	18.641	14.7418	18.8829	17.7003
	P08123	CO1A2_HUMAN Collagen alpha-2(I) chain OS=Homo sapiens OX=9606 GN=COL1A2 PE=1 SV=7	8	9.07194e-05	0.144465	16.7464	13.9396	16.259	13.305	16.9817	13.4449	15.9009	14.0335
	Q9NR12	PDLI7_HUMAN PDZ and LIM domain protein 7 OS=Homo sapiens OX=9606 GN=PDLIM7 PE=1 SV=1	5	0.00480884	0.136172	17.2131	14.3293	14.8021	13.8752	17.1829	13.5482	17.5265	13.466
	Q96S66	CLCC1_HUMAN Chloride channel CLIC-like protein 1 OS=Homo sapiens OX=9606 GN=CLCC1 PE=1 SV=1	5	0.00322783	0.132867	17.1	13.0392	14.8317	12.8811	17.0152	12.9368	15.3382	13.7803
	P04818	TYSY_HUMAN Thymidylate synthase OS=Homo sapiens OX=9606 GN=TYMS PE=1 SV=3	8	0.000332124	0.132619	17.4647	14.5767	18.3022	15.0731	18.8495	15.1943	17.6045	15.7182
	O94808	GFPT2_HUMAN Glutamine--fructose-6-phosphate aminotransferase [isomerizing] 2 OS=Homo sapiens OX=9606 GN=GFPT2 PE=1 SV=3	5	0.000410885	0.127575	17.6584	13.268	16.2417	13.9424	16.3295	14.363	16.5279	13.3018
	P12110	CO6A2_HUMAN Collagen alpha-2(VI) chain OS=Homo sapiens OX=9606 GN=COL6A2 PE=1 SV=4	4	7.21888e-06	0.109397	17.0265	13.5697	17.0508	13.563	17.2339	13.9442	16.313	13.7778
	Q13491	GPM6B_HUMAN Neuronal membrane glycoprotein M6-b OS=Homo sapiens OX=9606 GN=GPM6B PE=1 SV=2	3	0.00143794	0.0881418	18.7136	13.9937	16.1686	13.0135	16.4305	13.9588	17.5946	13.9252
	P78536	ADA17_HUMAN Disintegrin and metalloproteinase domain-containing protein 17 OS=Homo sapiens OX=9606 GN=ADAM17 PE=1 SV=1	3	0.019009	0.0584809	20.0943	13.5461	19.4082	18.895	19.4534	14.0548	18.3463	14.4228
	Q12788	TBL3_HUMAN Transducin beta-like protein 3 OS=Homo sapiens OX=9606 GN=TBL3 PE=1 SV=2	9	0.050076	1.51411	17.0088	17.4936	16.5845	17.6243	17.4148	17.3124	16.3607	17.3324
	Q9Y520	PRC2C_HUMAN Protein PRRC2C OS=Homo sapiens OX=9606 GN=PRRC2C PE=1 SV=4	13	0.0500772	0.46547	17.5483	15.4397	15.5887	15.6331	17.2176	15.7578	16.3168	15.4277
	P61769	B2MG_HUMAN Beta-2-microglobulin OS=Homo sapiens OX=9606 GN=B2M PE=1 SV=1	3	0.0502424	0.628889	17.8166	17.7944	18.044	17.7097	18.8188	17.7681	18.3634	17.0941
	P54136	SYRC_HUMAN Arginine--tRNA ligase, cytoplasmic OS=Homo sapiens OX=9606 GN=RARS1 PE=1 SV=2	21	0.0502516	1.24959	17.7908	18.1867	17.852	18.087	17.7467	17.7973	17.3967	18.001
	P34897	GLYM_HUMAN Serine hydroxymethyltransferase, mitochondrial OS=Homo sapiens OX=9606 GN=SHMT2 PE=1 SV=3	8	0.0504812	1.29356	17.9228	18.3178	18.0921	18.3298	17.4502	18.0694	17.9361	18.1696
	Q8N766	EMC1_HUMAN ER membrane protein complex subunit 1 OS=Homo sapiens OX=9606 GN=EMC1 PE=1 SV=1	10	0.0505138	1.30624	15.7772	16.4028	16.3269	16.5345	16.4401	16.6932	16.0933	16.5488
	P04150	GCR_HUMAN Glucocorticoid receptor OS=Homo sapiens OX=9606 GN=NR3C1 PE=1 SV=1	5	0.0505278	0.381454	16.0663	14.7856	14.2134	13.4895	16.5328	14.1262	15.5288	14.3784
	Q8N3C0	ASCC3_HUMAN Activating signal cointegrator 1 complex subunit 3 OS=Homo sapiens OX=9606 GN=ASCC3 PE=1 SV=3	4	0.0506221	1.72695	14.5303	14.9143	14.7562	15.7871	14.7783	15.2091	13.6876	14.9947
	P29320	EPHA3_HUMAN Ephrin type-A receptor 3 OS=Homo sapiens OX=9606 GN=EPHA3 PE=1 SV=2	11	0.0507528	0.341404	17.1556	14.7113	14.9939	14.1906	16.9625	14.6122	14.8269	14.2231
	Q9BY67	CADM1_HUMAN Cell adhesion molecule 1 OS=Homo sapiens OX=9606 GN=CADM1 PE=1 SV=2	3	0.0507832	0.242795	17.1906	14.4455	14.4659	14.0308	17.6355	13.7597	14.736	13.6232
	O75369	FLNB_HUMAN Filamin-B OS=Homo sapiens OX=9606 GN=FLNB PE=1 SV=2	76	0.0508218	1.13848	19.6892	19.7423	19.8135	19.8745	19.6986	19.8744	19.5348	19.9934
	Q9BYT8	NEUL_HUMAN Neurolysin, mitochondrial OS=Homo sapiens OX=9606 GN=NLN PE=1 SV=1	5	0.0508569	0.799211	16.1018	15.939	16.2668	15.5877	15.9599	15.9999	16.398	15.9065
	O94822	LTN1_HUMAN E3 ubiquitin-protein ligase listerin OS=Homo sapiens OX=9606 GN=LTN1 PE=1 SV=6	4	0.0512661	0.505656	15.6585	14.9116	14.4865	14.6985	15.8749	14.0683	15.3631	13.7695
	P42330	AK1C3_HUMAN Aldo-keto reductase family 1 member C3 OS=Homo sapiens OX=9606 GN=AKR1C3 PE=1 SV=4	6	0.0513819	0.626197	18.4098	16.7334	17.4993	17.2016	18.0633	17.5407	17.5347	17.3302
	Q9H3Q1	BORG4_HUMAN Cdc42 effector protein 4 OS=Homo sapiens OX=9606 GN=CDC42EP4 PE=1 SV=1	3	0.0514695	0.257196	18.4209	16.1827	16.3617	15.7983	17.1058	15.9149	17.0901	13.2465
	P35244	RFA3_HUMAN Replication protein A 14 kDa subunit OS=Homo sapiens OX=9606 GN=RPA3 PE=1 SV=1	3	0.051837	1.69236	16.8964	18.0567	16.8827	17.6801	16.9164	18.1241	18.0902	17.9609
	O75607	NPM3_HUMAN Nucleoplasmin-3 OS=Homo sapiens OX=9606 GN=NPM3 PE=1 SV=3	3	0.0518884	0.464294	17.0916	15.9954	15.6839	15.7898	17.0798	15.0443	16.1607	14.7589
	P10619	PPGB_HUMAN Lysosomal protective protein OS=Homo sapiens OX=9606 GN=CTSA PE=1 SV=2	5	0.0519147	0.739149	16.9898	16.3244	17.1236	16.7934	16.6587	16.7875	17.2397	16.3623
	P69849	NOMO3_HUMAN Nodal modulator 3 OS=Homo sapiens OX=9606 GN=NOMO3 PE=3 SV=2;sp	1	0.0520775	1.17617	16.4722	16.7485	16.4231	16.6594	16.246	16.774	16.5837	16.4796
	P30154	2AAB_HUMAN Serine/threonine-protein phosphatase 2A 65 kDa regulatory subunit A beta isoform OS=Homo sapiens OX=9606 GN=PPP2R1B PE=1 SV=3	2	0.0521171	0.486972	14.9239	13.5065	15.0103	13.5846	15.3772	14.6418	13.9183	13.3444
	Q9H3Z4	DNJC5_HUMAN DnaJ homolog subfamily C member 5 OS=Homo sapiens OX=9606 GN=DNAJC5 PE=1 SV=1	3	0.0525993	2.79557	14.1036	17.0515	15.4198	17.5172	16.6658	17.2013	16.5952	16.947
	P67812	SC11A_HUMAN Signal peptidase complex catalytic subunit SEC11A OS=Homo sapiens OX=9606 GN=SEC11A PE=1 SV=1	2	0.0528543	1.38466	16.4649	17.494	16.8144	17.0724	17.2158	17.0847	16.5571	17.2791
	Q9Y3F4	STRAP_HUMAN Serine-threonine kinase receptor-associated protein OS=Homo sapiens OX=9606 GN=STRAP PE=1 SV=1	9	0.0530445	1.26616	18.6894	19.3798	19.2858	19.0975	18.8905	19.3936	18.9643	19.3211
	P62873	GBB1_HUMAN Guanine nucleotide-binding protein G(I)/G(S)/G(T) subunit beta-1 OS=Homo sapiens OX=9606 GN=GNB1 PE=1 SV=3	4	0.0532243	1.39343	17.3078	18.021	18.1992	18.2882	17.6015	18.3168	17.823	18.2201
	Q96MU7	YTDC1_HUMAN YTH domain-containing protein 1 OS=Homo sapiens OX=9606 GN=YTHDC1 PE=1 SV=3	3	0.0533323	1.71008	13.8185	14.7697	15.0494	15.5676	14.6726	15.6069	14.6088	15.3014
	Q9NT62	ATG3_HUMAN Ubiquitin-like-conjugating enzyme ATG3 OS=Homo sapiens OX=9606 GN=ATG3 PE=1 SV=1	5	0.0534367	2.55801	14.5942	16.9616	15.9249	16.6273	14.0592	16.5549	16.37	16.2246
	P48681	NEST_HUMAN Nestin OS=Homo sapiens OX=9606 GN=NES PE=1 SV=2	52	0.0534798	1.33316	19.8031	20.6945	20.5404	20.6634	20.1773	20.6867	20.5124	20.6479
	Q9Y6K9	NEMO_HUMAN NF-kappa-B essential modulator OS=Homo sapiens OX=9606 GN=IKBKG PE=1 SV=2	3	0.0534921	0.5375	15.1839	14.6258	15.0329	14.8844	15.3155	14.5427	15.3503	13.2471
	Q9NUQ6	SPS2L_HUMAN SPATS2-like protein OS=Homo sapiens OX=9606 GN=SPATS2L PE=1 SV=2	11	0.0535069	0.587156	18.4167	16.5558	17.3551	16.7324	17.4066	17.1523	17.0697	16.7349
	Q9H6U8	ALG9_HUMAN Alpha-1,2-mannosyltransferase ALG9 OS=Homo sapiens OX=9606 GN=ALG9 PE=1 SV=2	2	0.0537254	1.85625	15.3786	15.402	15.5073	15.493	14.4896	16.1057	14.3014	16.2456
	Q8TBB5	KLDC4_HUMAN Kelch domain-containing protein 4 OS=Homo sapiens OX=9606 GN=KLHDC4 PE=1 SV=1	2	0.0540904	1.69173	15.1839	15.244	14.4233	15.4904	13.925	15.1541	14.088	14.7659
	Q13325	IFIT5_HUMAN Interferon-induced protein with tetratricopeptide repeats 5 OS=Homo sapiens OX=9606 GN=IFIT5 PE=1 SV=1	6	0.0543025	2.12973	15.0153	15.9684	16.4575	16.4856	14.4763	16.8105	15.5213	16.5685
	Q13554	KCC2B_HUMAN Calcium/calmodulin-dependent protein kinase type II subunit beta OS=Homo sapiens OX=9606 GN=CAMK2B PE=1 SV=3;sp	1	0.0544791	0.515318	15.1448	13.8862	14.2712	14.1627	15.2694	13.7178	13.954	13.0468
	Q9Y3B3	TMED7_HUMAN Transmembrane emp24 domain-containing protein 7 OS=Homo sapiens OX=9606 GN=TMED7 PE=1 SV=2	3	0.0546324	1.73885	17.3239	18.0225	17.206	17.9995	17.7366	17.7265	16.1905	17.901
	P21589	5NTD_HUMAN 5-nucleotidase OS=Homo sapiens OX=9606 GN=NT5E PE=1 SV=1	9	0.0550871	0.716957	17.3657	16.8422	16.7792	16.7541	17.3728	16.4996	16.8249	16.3266
	P51114	FXR1_HUMAN Fragile X mental retardation syndrome-related protein 1 OS=Homo sapiens OX=9606 GN=FXR1 PE=1 SV=3	13	0.0554868	0.605577	17.8899	16.7577	16.5233	16.7318	17.4631	16.5981	17.4092	16.3034
	O43395	PRPF3_HUMAN U4/U6 small nuclear ribonucleoprotein Prp3 OS=Homo sapiens OX=9606 GN=PRPF3 PE=1 SV=2	3	0.0554945	0.30493	16.0048	13.1674	16.2638	13.2251	15.7479	15.6376	16.5013	15.6339
	Q07157	ZO1_HUMAN Tight junction protein ZO-1 OS=Homo sapiens OX=9606 GN=TJP1 PE=1 SV=3	12	0.0555712	0.591918	17.1756	15.4383	15.7384	15.9461	16.5505	15.922	16.4719	15.6038
	Q15392	DHC24_HUMAN Delta(24)-sterol reductase OS=Homo sapiens OX=9606 GN=DHCR24 PE=1 SV=2	7	0.0555776	0.57325	18.5063	16.9035	17.6661	17.3762	18.6276	17.4796	17.3458	17.1754
	P35251	RFC1_HUMAN Replication factor C subunit 1 OS=Homo sapiens OX=9606 GN=RFC1 PE=1 SV=4	5	0.055716	0.398911	15.1264	13.6118	15.6782	15.1169	17.202	14.8665	15.8443	14.9523
	P82094	TMF1_HUMAN TATA element modulatory factor OS=Homo sapiens OX=9606 GN=TMF1 PE=1 SV=2	3	0.0559513	0.57117	16.1035	14.7149	14.8633	14.5533	15.0338	14.0161	14.799	14.2832
	Q15637	SF01_HUMAN Splicing factor 1 OS=Homo sapiens OX=9606 GN=SF1 PE=1 SV=4	6	0.056404	0.641746	17.6306	17.2853	17.6618	17.508	18.7719	17.3955	18.1407	17.4567
	P99999	CYC_HUMAN Cytochrome c OS=Homo sapiens OX=9606 GN=CYCS PE=1 SV=2	5	0.0565405	1.97497	16.3877	18.1959	17.6182	18.2304	16.5489	18.2482	18.0568	17.8645
	P04899	GNAI2_HUMAN Guanine nucleotide-binding protein G(i) subunit alpha-2 OS=Homo sapiens OX=9606 GN=GNAI2 PE=1 SV=3	8	0.0565835	0.8036	19.0808	18.4706	18.5194	18.2875	18.6604	18.4006	18.7367	18.5767
	P40818	UBP8_HUMAN Ubiquitin carboxyl-terminal hydrolase 8 OS=Homo sapiens OX=9606 GN=USP8 PE=1 SV=1	5	0.0566018	0.732088	16.1219	15.5946	16.6835	16.1165	16.0947	15.8467	16.0735	15.6161
	Q6WCQ1	MPRIP_HUMAN Myosin phosphatase Rho-interacting protein OS=Homo sapiens OX=9606 GN=MPRIP PE=1 SV=3	18	0.0566383	0.568177	17.3681	15.294	17.1091	16.5777	17.0343	16.6168	16.6628	16.4234
	P06396	GELS_HUMAN Gelsolin OS=Homo sapiens OX=9606 GN=GSN PE=1 SV=1	6	0.0568133	0.787671	20.7429	20.3466	20.4786	20.1836	20.8139	20.2645	20.2212	20.0845
	Q9NRY4	RHG35_HUMAN Rho GTPase-activating protein 35 OS=Homo sapiens OX=9606 GN=ARHGAP35 PE=1 SV=3	4	0.0571505	0.546675	16.7796	14.7014	15.4832	15.0254	15.7491	14.9897	15.0731	14.8835
	Q96CX2	KCD12_HUMAN BTB/POZ domain-containing protein KCTD12 OS=Homo sapiens OX=9606 GN=KCTD12 PE=1 SV=1	6	0.0574593	1.2394	17.7292	18.2312	17.7644	18.0907	18.2392	18.1096	17.7614	18.3013
	Q92499	DDX1_HUMAN ATP-dependent RNA helicase DDX1 OS=Homo sapiens OX=9606 GN=DDX1 PE=1 SV=2	16	0.0578749	0.695225	18.8691	17.6534	18.4009	17.8473	17.812	17.9051	18.2887	17.8671
	Q9BXF6	RFIP5_HUMAN Rab11 family-interacting protein 5 OS=Homo sapiens OX=9606 GN=RAB11FIP5 PE=1 SV=1	5	0.0580176	2.42836	13.6346	16.017	14.3779	16.3834	16.1698	16.0264	14.9451	15.8206
	Q13724	MOGS_HUMAN Mannosyl-oligosaccharide glucosidase OS=Homo sapiens OX=9606 GN=MOGS PE=1 SV=5	10	0.0580457	1.14457	17.3489	17.7058	17.3423	17.4384	17.1747	17.3903	17.3149	17.4255
	P40222	TXLNA_HUMAN Alpha-taxilin OS=Homo sapiens OX=9606 GN=TXLNA PE=1 SV=3	7	0.0580751	0.616939	17.3294	16.4382	16.9113	16.947	17.7932	17.0897	18.111	16.8829
	O15460	P4HA2_HUMAN Prolyl 4-hydroxylase subunit alpha-2 OS=Homo sapiens OX=9606 GN=P4HA2 PE=1 SV=1	10	0.058146	0.536653	18.6755	17.1744	17.6408	17.4523	18.2747	17.1161	17.2193	16.4757
	Q9Y6K5	OAS3_HUMAN 2-5-oligoadenylate synthase 3 OS=Homo sapiens OX=9606 GN=OAS3 PE=1 SV=3	6	0.0581862	2.78439	13.7972	14.1444	14.1388	16.5796	14.6064	16.7702	14.5765	15.5341
	P19022	CADH2_HUMAN Cadherin-2 OS=Homo sapiens OX=9606 GN=CDH2 PE=1 SV=4	4	0.0582398	0.372136	18.221	14.8031	16.3213	16.6145	18.0682	16.568	17.152	16.0726
	Q9NR31	SAR1A_HUMAN GTP-binding protein SAR1a OS=Homo sapiens OX=9606 GN=SAR1A PE=1 SV=1	4	0.0583002	1.44956	16.3212	16.3233	16.343	17.4142	16.491	16.8621	16.3138	17.012
	Q13188	STK3_HUMAN Serine/threonine-protein kinase 3 OS=Homo sapiens OX=9606 GN=STK3 PE=1 SV=2	2	0.0583539	0.607964	14.5604	13.8679	14.9731	13.694	14.4333	13.4765	14.7163	14.773
	Q86TU7	SETD3_HUMAN Actin-histidine N-methyltransferase OS=Homo sapiens OX=9606 GN=SETD3 PE=1 SV=1	3	0.0585531	0.375629	15.4578	13.2972	13.9883	12.8861	15.7186	12.982	13.3003	13.6493
	Q9P253	VPS18_HUMAN Vacuolar protein sorting-associated protein 18 homolog OS=Homo sapiens OX=9606 GN=VPS18 PE=1 SV=2	5	0.0586449	1.84011	15.1707	14.9671	13.9503	15.2011	13.632	14.6392	13.9134	15.3782
	Q03518	TAP1_HUMAN Antigen peptide transporter 1 OS=Homo sapiens OX=9606 GN=TAP1 PE=1 SV=2	7	0.0586557	1.9525	14.0631	15.2311	15.4349	16.3929	14.8372	15.5648	14.2356	15.2432
	P00403	COX2_HUMAN Cytochrome c oxidase subunit 2 OS=Homo sapiens OX=9606 GN=MT-CO2 PE=1 SV=1	5	0.0589861	0.707985	16.7869	16.9174	17.253	16.7792	17.5754	16.7265	17.7291	16.9284
	P48444	COPD_HUMAN Coatomer subunit delta OS=Homo sapiens OX=9606 GN=ARCN1 PE=1 SV=1	15	0.0591262	0.841771	18.0736	17.784	18.0309	17.5959	17.807	17.889	18.2123	17.861
	Q7Z2T5	TRM1L_HUMAN TRMT1-like protein OS=Homo sapiens OX=9606 GN=TRMT1L PE=1 SV=2	3	0.059313	0.575169	15.4035	14.5983	14.7858	15.0146	16.1506	14.6526	15.2028	14.0855
	Q14192	FHL2_HUMAN Four and a half LIM domains protein 2 OS=Homo sapiens OX=9606 GN=FHL2 PE=1 SV=3	8	0.0593772	0.60623	16.569	15.4497	16.9467	16.3374	16.7047	16.7742	17.1411	15.912
	O75368	SH3L1_HUMAN SH3 domain-binding glutamic acid-rich-like protein OS=Homo sapiens OX=9606 GN=SH3BGRL PE=1 SV=1	4	0.0594224	2.21234	14.5285	15.4986	16.2875	16.5406	14.9185	16.6878	14.5437	16.1335
	Q9Y383	LC7L2_HUMAN Putative RNA-binding protein Luc7-like 2 OS=Homo sapiens OX=9606 GN=LUC7L2 PE=1 SV=2	5	0.0595964	1.4498	16.5274	17.7456	17.1953	17.4154	16.7086	17.566	17.4158	17.2634
	P46821	MAP1B_HUMAN Microtubule-associated protein 1B OS=Homo sapiens OX=9606 GN=MAP1B PE=1 SV=2	74	0.0596184	0.868423	20.9942	20.7573	20.8651	20.7665	21.23	20.7999	20.858	20.8095
	O15355	PPM1G_HUMAN Protein phosphatase 1G OS=Homo sapiens OX=9606 GN=PPM1G PE=1 SV=1	13	0.0596527	0.439474	19.8105	17.4986	17.4364	17.5591	19.0286	17.5053	18.2924	17.2603
	Q14738	2A5D_HUMAN Serine/threonine-protein phosphatase 2A 56 kDa regulatory subunit delta isoform OS=Homo sapiens OX=9606 GN=PPP2R5D PE=1 SV=1	3	0.0599087	0.5103	15.593	14.1221	15.8858	14.8291	15.4583	13.8653	15.4411	15.6794
	Q9H4A6	GOLP3_HUMAN Golgi phosphoprotein 3 OS=Homo sapiens OX=9606 GN=GOLPH3 PE=1 SV=1	4	0.0600081	0.513311	14.2753	12.6408	13.132	12.8482	14.6321	13.8296	14.0002	12.8725
	P31040	SDHA_HUMAN Succinate dehydrogenase [ubiquinone] flavoprotein subunit, mitochondrial OS=Homo sapiens OX=9606 GN=SDHA PE=1 SV=2	15	0.0600123	0.545849	18.687	16.56	17.4539	17.1647	18.3052	17.3764	17.296	17.1473
	P06454	PTMA_HUMAN Prothymosin alpha OS=Homo sapiens OX=9606 GN=PTMA PE=1 SV=2	2	0.0605968	2.58996	14.9589	15.9956	14.6905	16.8236	13.5457	16.179	16.2773	15.9659
	Q9BPW8	NIPS1_HUMAN Protein NipSnap homolog 1 OS=Homo sapiens OX=9606 GN=NIPSNAP1 PE=1 SV=1	4	0.0606485	1.9464	15.7165	15.4391	15.3082	15.994	15.0609	16.1896	13.9783	16.2843
	P14324	FPPS_HUMAN Farnesyl pyrophosphate synthase OS=Homo sapiens OX=9606 GN=FDPS PE=1 SV=4	3	0.0608163	1.31216	18.4284	18.5933	18.3324	18.4892	18.0725	18.4816	17.6758	18.5128
	P61011	SRP54_HUMAN Signal recognition particle 54 kDa protein OS=Homo sapiens OX=9606 GN=SRP54 PE=1 SV=1	10	0.0609537	1.50512	16.7866	17.8177	17.4113	17.5841	16.4864	17.5324	17.5236	17.6333
	P46108	CRK_HUMAN Adapter molecule crk OS=Homo sapiens OX=9606 GN=CRK PE=1 SV=2	6	0.0609832	0.587082	16.3666	15.2283	15.4547	15.2957	16.9476	15.5383	16.1603	15.7936
	P55084	ECHB_HUMAN Trifunctional enzyme subunit beta, mitochondrial OS=Homo sapiens OX=9606 GN=HADHB PE=1 SV=3	11	0.0614313	0.881217	17.3212	17.1177	17.5905	17.3146	17.5145	17.3384	17.4094	17.3352
	Q92552	RT27_HUMAN 28S ribosomal protein S27, mitochondrial OS=Homo sapiens OX=9606 GN=MRPS27 PE=1 SV=3	5	0.0614398	0.215039	18.7564	14.6915	14.3223	14.9894	16.8976	13.4972	16.4637	14.3926
	Q9UH65	SWP70_HUMAN Switch-associated protein 70 OS=Homo sapiens OX=9606 GN=SWAP70 PE=1 SV=1	12	0.0617903	2.19305	16.0291	16.0651	16.2529	16.6066	15.1838	16.6224	14.2266	16.9301
	Q7Z4W1	DCXR_HUMAN L-xylulose reductase OS=Homo sapiens OX=9606 GN=DCXR PE=1 SV=2	4	0.0617959	2.98732	13.6942	16.5626	16.7507	17.2384	14.9381	17.0314	16.1141	16.9801
	Q9UMR2	DD19B_HUMAN ATP-dependent RNA helicase DDX19B OS=Homo sapiens OX=9606 GN=DDX19B PE=1 SV=1	2	0.0618714	0.639753	17.2308	16.8385	17.2616	16.4679	18.1595	17.2568	17.6556	17.1666
	Q96D46	NMD3_HUMAN 60S ribosomal export protein NMD3 OS=Homo sapiens OX=9606 GN=NMD3 PE=1 SV=1	4	0.0623563	1.47344	15.9573	16.0799	15.897	15.9971	15.1648	16.0383	15.0265	16.167
	Q9UL46	PSME2_HUMAN Proteasome activator complex subunit 2 OS=Homo sapiens OX=9606 GN=PSME2 PE=1 SV=4	7	0.0623893	2.55298	18.8468	19.0802	18.3292	19.8692	19.0706	19.3283	16.6444	20.0222
	Q09666	AHNK_HUMAN Neuroblast differentiation-associated protein AHNAK OS=Homo sapiens OX=9606 GN=AHNAK PE=1 SV=2	135	0.0624583	0.866377	19.4089	19.4281	19.3426	19.071	19.3201	19.1068	19.4368	19.0747
	P30153	2AAA_HUMAN Serine/threonine-protein phosphatase 2A 65 kDa regulatory subunit A alpha isoform OS=Homo sapiens OX=9606 GN=PPP2R1A PE=1 SV=4	15	0.0626008	0.821768	19.6868	19.0094	19.2272	19.0255	19.4625	19.3001	19.3587	19.2676
	O43920	NDUS5_HUMAN NADH dehydrogenase [ubiquinone] iron-sulfur protein 5 OS=Homo sapiens OX=9606 GN=NDUFS5 PE=1 SV=3	2	0.0626051	0.289792	16.6498	14.2421	15.7078	13.8301	17.6917	14.1961	14.1104	14.7437
	Q92820	GGH_HUMAN Gamma-glutamyl hydrolase OS=Homo sapiens OX=9606 GN=GGH PE=1 SV=2	9	0.0627422	0.830139	18.3622	18.326	18.3922	18.0679	18.7076	18.4086	18.6872	18.2723
	O95071	UBR5_HUMAN E3 ubiquitin-protein ligase UBR5 OS=Homo sapiens OX=9606 GN=UBR5 PE=1 SV=2	5	0.062774	0.382988	16.3684	14.0434	14.8405	13.2491	14.2238	13.1184	13.7561	13.2394
	P00491	PNPH_HUMAN Purine nucleoside phosphorylase OS=Homo sapiens OX=9606 GN=PNP PE=1 SV=2	10	0.0630231	1.41267	17.1818	17.7084	17.9421	17.9643	16.9863	17.9801	17.5074	17.9584
	Q9UHB6	LIMA1_HUMAN LIM domain and actin-binding protein 1 OS=Homo sapiens OX=9606 GN=LIMA1 PE=1 SV=1	11	0.0633943	7.37253	17.0114	18.0951	17.0658	19.3347	16.9247	18.9814	12.0761	18.1956
	Q99439	CNN2_HUMAN Calponin-2 OS=Homo sapiens OX=9606 GN=CNN2 PE=1 SV=4	6	0.0634045	0.743436	18.1283	18.0177	17.9436	17.706	18.2134	17.9745	18.4919	17.368
	P22307	NLTP_HUMAN Non-specific lipid-transfer protein OS=Homo sapiens OX=9606 GN=SCP2 PE=1 SV=2	2	0.063441	0.746284	16.845	16.4037	17.2038	16.6345	16.6121	16.8255	17.1852	16.2936
	P49915	GUAA_HUMAN GMP synthase [glutamine-hydrolyzing] OS=Homo sapiens OX=9606 GN=GMPS PE=1 SV=1	16	0.0640457	0.694974	18.0513	17.0491	18.1548	17.3015	18.0457	17.5998	17.302	17.5035
	Q32P28	P3H1_HUMAN Prolyl 3-hydroxylase 1 OS=Homo sapiens OX=9606 GN=P3H1 PE=1 SV=2	5	0.0641342	1.9372	17.0381	17.3668	15.7062	17.8113	17.4178	17.2681	16.6223	18.1541
	Q96EY1	DNJA3_HUMAN DnaJ homolog subfamily A member 3, mitochondrial OS=Homo sapiens OX=9606 GN=DNAJA3 PE=1 SV=2	2	0.064762	0.602572	15.5291	13.9279	15.3299	14.3715	14.8839	15.1757	15.5933	14.938
	P19784	CSK22_HUMAN Casein kinase II subunit alpha OS=Homo sapiens OX=9606 GN=CSNK2A2 PE=1 SV=1	14	0.064762	0.760262	18.1164	17.2057	18.1922	17.8278	18.0292	17.8518	18.097	17.9677
	Q14247	SRC8_HUMAN Src substrate cortactin OS=Homo sapiens OX=9606 GN=CTTN PE=1 SV=2	13	0.0647963	0.826776	19.182	18.5572	18.6758	18.5591	18.8128	18.6863	18.7237	18.494
	P31150	GDIA_HUMAN Rab GDP dissociation inhibitor alpha OS=Homo sapiens OX=9606 GN=GDI1 PE=1 SV=2	12	0.0649187	1.4932	18.891	19.8061	19.8601	19.7458	18.7918	19.9579	19.4826	19.8294
	P80217	IN35_HUMAN Interferon-induced 35 kDa protein OS=Homo sapiens OX=9606 GN=IFI35 PE=1 SV=5	2	0.064992	3.80976	17.1192	17.5471	13.6966	17.2055	16.4523	17.287	14.0946	17.042
	Q9UKY7	CDV3_HUMAN Protein CDV3 homolog OS=Homo sapiens OX=9606 GN=CDV3 PE=1 SV=1	13	0.0650354	0.690085	17.8453	16.9204	16.7994	16.8805	17.7413	16.8736	17.3435	16.9144
	Q9Y3Z3	SAMH1_HUMAN Deoxynucleoside triphosphate triphosphohydrolase SAMHD1 OS=Homo sapiens OX=9606 GN=SAMHD1 PE=1 SV=2	18	0.0656538	4.98305	15.411	17.0076	14.9924	17.3272	16.5424	17.4362	11.8714	16.3143
	Q8TCJ2	STT3B_HUMAN Dolichyl-diphosphooligosaccharide--protein glycosyltransferase subunit STT3B OS=Homo sapiens OX=9606 GN=STT3B PE=1 SV=1	7	0.0660207	1.24124	17.0822	17.3147	16.7288	17.2317	16.9873	17.0245	16.5629	17.0374
	O60313	OPA1_HUMAN Dynamin-like 120 kDa protein, mitochondrial OS=Homo sapiens OX=9606 GN=OPA1 PE=1 SV=3	16	0.0666086	0.775111	17.5273	16.5593	16.8858	16.8705	16.9348	16.6944	16.9519	16.7055
	Q7Z4V5	HDGR2_HUMAN Hepatoma-derived growth factor-related protein 2 OS=Homo sapiens OX=9606 GN=HDGFL2 PE=1 SV=1	3	0.0666945	0.60648	18.1334	17.565	17.3077	17.0664	18.1149	17.4523	17.8316	16.4179
	P55809	SCOT1_HUMAN Succinyl-CoA:3-ketoacid coenzyme A transferase 1, mitochondrial OS=Homo sapiens OX=9606 GN=OXCT1 PE=1 SV=1	4	0.0676285	0.481711	15.6251	13.7236	15.6487	15.1782	15.4215	15.6204	16.3812	14.3393
	P20265	PO3F2_HUMAN POU domain, class 3, transcription factor 2 OS=Homo sapiens OX=9606 GN=POU3F2 PE=1 SV=4	2	0.067655	0.330779	16.2536	16.3535	15.6247	13.9981	17.137	14.4891	15.6903	13.4806
	Q99873	ANM1_HUMAN Protein arginine N-methyltransferase 1 OS=Homo sapiens OX=9606 GN=PRMT1 PE=1 SV=3	10	0.0676737	1.33035	18.6925	19.3393	19.2811	19.4357	18.5464	19.2356	19.1831	19.3397
	P83731	RL24_HUMAN 60S ribosomal protein L24 OS=Homo sapiens OX=9606 GN=RPL24 PE=1 SV=1	3	0.0677064	3.14071	16.4151	17.3257	16.5292	16.658	15.8964	17.4223	13.4687	17.5077
	P07195	LDHB_HUMAN L-lactate dehydrogenase B chain OS=Homo sapiens OX=9606 GN=LDHB PE=1 SV=2	13	0.0678188	1.24687	20.0455	20.2306	20.4233	20.6768	20.3183	20.5284	20.0066	20.6312
	P08238	HS90B_HUMAN Heat shock protein HSP 90-beta OS=Homo sapiens OX=9606 GN=HSP90AB1 PE=1 SV=4	23	0.0679376	0.832854	22.0151	21.9713	22.0122	21.9439	22.5009	21.8823	22.1641	21.8394
	P29590	PML_HUMAN Protein PML OS=Homo sapiens OX=9606 GN=PML PE=1 SV=3	10	0.0681052	1.78257	17.7285	18.1777	16.2077	18.3044	17.761	17.8694	17.3127	17.9944
	P42285	MTREX_HUMAN Exosome RNA helicase MTR4 OS=Homo sapiens OX=9606 GN=MTREX PE=1 SV=3	6	0.0681412	0.535482	16.3117	14.4793	16.7837	15.684	16.485	15.6386	16.1351	16.3094
	Q9NVI1	FANCI_HUMAN Fanconi anemia group I protein OS=Homo sapiens OX=9606 GN=FANCI PE=1 SV=4	3	0.068193	0.450778	15.6915	14.2436	13.7354	14.1568	15.5295	13.9977	15.1313	13.0915
	O60936	NOL3_HUMAN Nucleolar protein 3 OS=Homo sapiens OX=9606 GN=NOL3 PE=1 SV=2	2	0.0685472	0.275129	17.4277	16.1396	15.9646	14.236	17.8636	16.7486	17.0073	13.6917
	O15121	DEGS1_HUMAN Sphingolipid delta(4)-desaturase DES1 OS=Homo sapiens OX=9606 GN=DEGS1 PE=1 SV=1	3	0.0686294	0.530206	16.855	15.6838	15.4479	15.3453	16.7608	15.117	15.5928	14.849
	P32321	DCTD_HUMAN Deoxycytidylate deaminase OS=Homo sapiens OX=9606 GN=DCTD PE=1 SV=2	2	0.0687005	0.4453	16.4112	13.6835	14.5794	13.2938	14.6802	14.6579	15.0193	14.3864
	Q9Y4Y9	LSM5_HUMAN U6 snRNA-associated Sm-like protein LSm5 OS=Homo sapiens OX=9606 GN=LSM5 PE=1 SV=3	2	0.0687369	0.455193	15.6358	14.8196	16.4618	14.515	15.7335	15.8901	17.4001	15.4647
	Q9UPN3	MACF1_HUMAN Microtubule-actin cross-linking factor 1, isoforms 1/2/3/5 OS=Homo sapiens OX=9606 GN=MACF1 PE=1 SV=4	43	0.0687638	0.803298	17.1817	16.4476	17.1231	16.6727	16.8756	16.6693	16.6291	16.7559
	O95394	AGM1_HUMAN Phosphoacetylglucosamine mutase OS=Homo sapiens OX=9606 GN=PGM3 PE=1 SV=1	7	0.0687654	1.23317	17.2538	17.56	17.6448	17.7249	17.173	17.8143	17.2487	17.4305
	Q15125	EBP_HUMAN 3-beta-hydroxysteroid-Delta(8),Delta(7)-isomerase OS=Homo sapiens OX=9606 GN=EBP PE=1 SV=3	2	0.0688161	4.83589	15.1512	18.3595	18.9683	18.7062	14.4385	18.9179	17.1022	18.7717
	P19525	E2AK2_HUMAN Interferon-induced, double-stranded RNA-activated protein kinase OS=Homo sapiens OX=9606 GN=EIF2AK2 PE=1 SV=2	8	0.0688589	1.14584	17.4518	17.43	17.2387	17.5793	17.4947	17.6784	17.2199	17.5029
	P49748	ACADV_HUMAN Very long-chain specific acyl-CoA dehydrogenase, mitochondrial OS=Homo sapiens OX=9606 GN=ACADVL PE=1 SV=1	14	0.0691099	0.811931	19.7047	19.277	19.5142	19.1683	19.1476	18.9467	19.3772	19.1493
	Q9H3U1	UN45A_HUMAN Protein unc-45 homolog A OS=Homo sapiens OX=9606 GN=UNC45A PE=1 SV=1	9	0.0692006	0.764911	16.6811	16.5938	16.9613	16.6563	16.7764	16.0306	17.0644	16.6559
	Q9BRA2	TXD17_HUMAN Thioredoxin domain-containing protein 17 OS=Homo sapiens OX=9606 GN=TXNDC17 PE=1 SV=1	3	0.0693969	1.49741	16.5434	17.0592	16.7369	17.2162	15.9052	17.3834	17.067	16.9236
	Q6UW68	TM205_HUMAN Transmembrane protein 205 OS=Homo sapiens OX=9606 GN=TMEM205 PE=1 SV=1	2	0.0694065	1.81614	16.2765	17.7627	18.0884	17.9901	16.8202	18.0293	17.2624	18.1087
	P55957	BID_HUMAN BH3-interacting domain death agonist OS=Homo sapiens OX=9606 GN=BID PE=1 SV=1	3	0.0696482	1.91727	15.9302	16.6573	14.3918	16.4691	15.528	16.2952	16.3394	16.5239
	Q9GZP9	DERL2_HUMAN Derlin-2 OS=Homo sapiens OX=9606 GN=DERL2 PE=1 SV=1	2	0.0701778	0.386112	16.8551	14.9331	14.1092	13.8075	15.7109	14.2255	16.1049	14.3224
	Q9BX40	LS14B_HUMAN Protein LSM14 homolog B OS=Homo sapiens OX=9606 GN=LSM14B PE=1 SV=1	5	0.0702263	0.708871	17.7557	17.2252	17.4579	17.0895	18.1455	17.0049	17.1062	17.16
	P02794	FRIH_HUMAN Ferritin heavy chain OS=Homo sapiens OX=9606 GN=FTH1 PE=1 SV=2	7	0.0703315	1.72774	17.5954	18.2106	18.6983	18.9212	17.5855	19.0079	18.3636	19.2587
	P54577	SYYC_HUMAN Tyrosine--tRNA ligase, cytoplasmic OS=Homo sapiens OX=9606 GN=YARS1 PE=1 SV=4	13	0.0704969	1.48362	17.4825	18.0312	17.7257	17.8993	16.7303	18.0303	17.8784	18.1327
	P15170	ERF3A_HUMAN Eukaryotic peptide chain release factor GTP-binding subunit ERF3A OS=Homo sapiens OX=9606 GN=GSPT1 PE=1 SV=1	4	0.0706106	2.365	16.2004	17.423	16.9353	17.9069	17.6764	17.6726	15.0715	17.8484
	Q9P000	COMD9_HUMAN COMM domain-containing protein 9 OS=Homo sapiens OX=9606 GN=COMMD9 PE=1 SV=2	5	0.0707375	0.678097	16.765	16.8238	17.2895	16.4501	16.9868	16.7486	17.8829	16.66
	Q9C0C2	TB182_HUMAN 182 kDa tankyrase-1-binding protein OS=Homo sapiens OX=9606 GN=TNKS1BP1 PE=1 SV=4	22	0.0707604	0.533244	18.2399	16.6666	16.5261	16.6359	18.1158	16.5392	17.0989	16.5105
	P52294	IMA5_HUMAN Importin subunit alpha-5 OS=Homo sapiens OX=9606 GN=KPNA1 PE=1 SV=3	4	0.0708647	0.684627	18.2488	17.6228	17.2991	17.2199	17.6336	16.9856	18.0322	17.1991
	Q7L7X3	TAOK1_HUMAN Serine/threonine-protein kinase TAO1 OS=Homo sapiens OX=9606 GN=TAOK1 PE=1 SV=1	3	0.0710362	0.358146	16.9726	14.302	15.569	14.1553	13.8558	13.6502	15.075	13.4394
	P49770	EI2BB_HUMAN Translation initiation factor eIF-2B subunit beta OS=Homo sapiens OX=9606 GN=EIF2B2 PE=1 SV=3	7	0.0710591	1.43963	16.4855	17.1798	17.0458	17.0131	16.0301	17.0179	16.8873	17.3407
	P31751	AKT2_HUMAN RAC-beta serine/threonine-protein kinase OS=Homo sapiens OX=9606 GN=AKT2 PE=1 SV=2	2	0.0714365	0.590503	15.1214	14.5677	14.4519	13.5054	15.1439	13.9035	14.0674	13.768
	O00159	MYO1C_HUMAN Unconventional myosin-Ic OS=Homo sapiens OX=9606 GN=MYO1C PE=1 SV=4	24	0.0716556	0.82576	18.6957	18.5147	18.8676	18.4618	19.154	18.6466	18.843	18.8324
	Q99570	PI3R4_HUMAN Phosphoinositide 3-kinase regulatory subunit 4 OS=Homo sapiens OX=9606 GN=PIK3R4 PE=1 SV=3	3	0.0718936	2.14667	13.9951	15.8366	15.8166	16.2915	14.3056	16.2882	15.8636	15.973
	Q86X76	NIT1_HUMAN Deaminated glutathione amidase OS=Homo sapiens OX=9606 GN=NIT1 PE=1 SV=2	2	0.0719615	0.503955	15.6565	14.934	14.5697	13.3029	15.1753	13.6404	15.1102	14.6798
	P68431	H31_HUMAN Histone H3.1 OS=Homo sapiens OX=9606 GN=H3C1 PE=1 SV=2;sp	1	0.0721523	0.430114	16.8305	15.3025	15.879	14.6746	17.212	14.4178	15.2199	15.8776
	Q71RC2	LARP4_HUMAN La-related protein 4 OS=Homo sapiens OX=9606 GN=LARP4 PE=1 SV=3	3	0.0723786	0.807842	16.3649	15.6292	15.9788	15.6703	16.0648	15.802	15.7102	15.7859
	P14866	HNRPL_HUMAN Heterogeneous nuclear ribonucleoprotein L OS=Homo sapiens OX=9606 GN=HNRNPL PE=1 SV=2	19	0.0725554	0.630176	20.8588	19.7388	19.8356	19.5703	20.6107	19.561	19.6219	19.3923
	O43615	TIM44_HUMAN Mitochondrial import inner membrane translocase subunit TIM44 OS=Homo sapiens OX=9606 GN=TIMM44 PE=1 SV=2	5	0.0725755	1.45543	15.4856	16.6908	16.1709	16.3281	15.4193	16.2447	16.2886	16.2666
	P84085	ARF5_HUMAN ADP-ribosylation factor 5 OS=Homo sapiens OX=9606 GN=ARF5 PE=1 SV=2	2	0.0727127	0.226457	15.6778	14.5146	18.1446	13.9232	16.3397	13.295	13.5629	13.4215
	Q00688	FKBP3_HUMAN Peptidyl-prolyl cis-trans isomerase FKBP3 OS=Homo sapiens OX=9606 GN=FKBP3 PE=1 SV=1	4	0.072721	0.671261	18.3969	17.4804	17.3157	17.6119	18.2791	17.3173	17.863	17.1449
	P51149	RAB7A_HUMAN Ras-related protein Rab-7a OS=Homo sapiens OX=9606 GN=RAB7A PE=1 SV=1	7	0.0731796	1.38025	18.5965	19.2497	19.4165	19.0964	18.5862	19.4573	18.8106	19.4662
	P78346	RPP30_HUMAN Ribonuclease P protein subunit p30 OS=Homo sapiens OX=9606 GN=RPP30 PE=1 SV=1	4	0.0731964	0.684152	15.9831	15.4316	15.6278	15.9059	16.6505	15.5519	16.0753	15.2568
	P12268	IMDH2_HUMAN Inosine-5-monophosphate dehydrogenase 2 OS=Homo sapiens OX=9606 GN=IMPDH2 PE=1 SV=2	17	0.0732251	0.855003	20.0011	19.7458	19.9099	19.4985	19.6068	19.5688	19.7315	19.532
	O43837	IDH3B_HUMAN Isocitrate dehydrogenase [NAD] subunit beta, mitochondrial OS=Homo sapiens OX=9606 GN=IDH3B PE=1 SV=2	10	0.0734226	1.28592	18.888	18.6815	18.3426	19.0683	18.6816	18.9946	18.2722	18.8912
	Q9H4A4	AMPB_HUMAN Aminopeptidase B OS=Homo sapiens OX=9606 GN=RNPEP PE=1 SV=2	15	0.0738312	1.48666	17.1433	18.2565	17.9346	18.6207	18.3403	18.2779	17.7202	18.2716
	O43318	M3K7_HUMAN Mitogen-activated protein kinase kinase kinase 7 OS=Homo sapiens OX=9606 GN=MAP3K7 PE=1 SV=1	2	0.0738567	1.59053	14.4222	15.2843	14.2111	15.361	14.2042	15.2422	15.4831	15.1112
	P11172	UMPS_HUMAN Uridine 5-monophosphate synthase OS=Homo sapiens OX=9606 GN=UMPS PE=1 SV=1	4	0.0740747	1.39599	16.0768	17.0715	17.0203	16.8407	16.1541	16.9347	16.5738	16.9032
	P30533	AMRP_HUMAN Alpha-2-macroglobulin receptor-associated protein OS=Homo sapiens OX=9606 GN=LRPAP1 PE=1 SV=1	3	0.0741481	0.368509	17.4506	14.318	15.4976	14.6832	16.277	14.6715	14.3468	14.1384
	Q86Y56	DAAF5_HUMAN Dynein assembly factor 5, axonemal OS=Homo sapiens OX=9606 GN=DNAAF5 PE=1 SV=4	5	0.0744338	0.534775	14.7457	14.3054	15.779	15.0964	15.687	15.2101	15.8336	13.8214
	Q3ZCQ8	TIM50_HUMAN Mitochondrial import inner membrane translocase subunit TIM50 OS=Homo sapiens OX=9606 GN=TIMM50 PE=1 SV=2	4	0.0744921	0.691865	18.8673	17.8238	18.053	17.7709	17.8011	17.4417	18.074	17.6333
	P52434	RPAB3_HUMAN DNA-directed RNA polymerases I, II, and III subunit RPABC3 OS=Homo sapiens OX=9606 GN=POLR2H PE=1 SV=4	3	0.0744938	0.491114	18.8437	17.1272	16.8245	16.6058	18.2706	16.5923	17.2818	16.792
	P17987	TCPA_HUMAN T-complex protein 1 subunit alpha OS=Homo sapiens OX=9606 GN=TCP1 PE=1 SV=1	21	0.0749532	1.25775	19.1194	19.6445	19.5759	19.7139	19.3829	19.8401	19.7589	19.962
	P49736	MCM2_HUMAN DNA replication licensing factor MCM2 OS=Homo sapiens OX=9606 GN=MCM2 PE=1 SV=4	11	0.0752194	0.808137	17.3668	17.2589	17.0427	16.8138	17.3995	16.8023	17.1157	16.8204
	P51572	BAP31_HUMAN B-cell receptor-associated protein 31 OS=Homo sapiens OX=9606 GN=BCAP31 PE=1 SV=3	11	0.075431	1.57333	17.8248	19.058	18.7682	19.4023	18.7306	19.1903	19.1967	19.4851
	Q99460	PSMD1_HUMAN 26S proteasome non-ATPase regulatory subunit 1 OS=Homo sapiens OX=9606 GN=PSMD1 PE=1 SV=2	22	0.0754623	0.882218	18.9223	18.8728	19.0078	18.8343	19.221	18.7988	18.8452	18.7673
	Q6P597	KLC3_HUMAN Kinesin light chain 3 OS=Homo sapiens OX=9606 GN=KLC3 PE=1 SV=2	2	0.0754884	1.81348	15.1634	15.2263	14.7477	15.2601	13.5879	14.9427	13.6619	15.1668
	P63208	SKP1_HUMAN S-phase kinase-associated protein 1 OS=Homo sapiens OX=9606 GN=SKP1 PE=1 SV=2	7	0.0757827	0.478579	18.5638	16.1169	16.3534	16.9389	17.732	16.5259	17.3582	16.1731
	Q9BSJ2	GCP2_HUMAN Gamma-tubulin complex component 2 OS=Homo sapiens OX=9606 GN=TUBGCP2 PE=1 SV=2	10	0.0760239	0.405041	16.4736	14.2621	14.9198	14.7936	16.2227	14.7461	14.5515	13.1504
	A0AVT1	UBA6_HUMAN Ubiquitin-like modifier-activating enzyme 6 OS=Homo sapiens OX=9606 GN=UBA6 PE=1 SV=1	23	0.0760239	1.30448	18.0526	18.7057	18.4844	18.3448	17.8382	18.5981	18.4513	18.7117
	P11586	C1TC_HUMAN C-1-tetrahydrofolate synthase, cytoplasmic OS=Homo sapiens OX=9606 GN=MTHFD1 PE=1 SV=3	20	0.0760799	1.39883	18.151	19.0926	19.177	19.0529	18.4083	19.1994	18.7872	19.1154
	P05106	ITB3_HUMAN Integrin beta-3 OS=Homo sapiens OX=9606 GN=ITGB3 PE=1 SV=2	5	0.0760939	0.493554	16.4699	14.5377	15.067	15.4055	17.1015	15.417	16.1354	15.3388
	P30048	PRDX3_HUMAN Thioredoxin-dependent peroxide reductase, mitochondrial OS=Homo sapiens OX=9606 GN=PRDX3 PE=1 SV=3	6	0.0761115	0.724916	19.0471	18.6789	18.7676	18.7716	19.7068	18.4488	18.9452	18.7109
	Q8TCC3	RM30_HUMAN 39S ribosomal protein L30, mitochondrial OS=Homo sapiens OX=9606 GN=MRPL30 PE=1 SV=1	2	0.0763343	0.631198	15.4158	15.6484	16.1158	15.2576	16.8653	15.4602	15.969	15.3444
	P84103	SRSF3_HUMAN Serine/arginine-rich splicing factor 3 OS=Homo sapiens OX=9606 GN=SRSF3 PE=1 SV=1	1	0.0763977	0.58429	14.0826	13.713	13.2037	13.5382	14.4305	12.7986	14.2343	12.8004
	Q15393	SF3B3_HUMAN Splicing factor 3B subunit 3 OS=Homo sapiens OX=9606 GN=SF3B3 PE=1 SV=4	17	0.076417	0.812026	20.1597	19.5383	19.8335	19.509	19.5079	19.4586	19.6695	19.4631
	Q9H078	CLPB_HUMAN Caseinolytic peptidase B protein homolog OS=Homo sapiens OX=9606 GN=CLPB PE=1 SV=1	6	0.0768139	0.403139	16.5968	14.5565	14.55	14.3364	16.7746	14.4274	14.6528	14.0113
	Q92922	SMRC1_HUMAN SWI/SNF complex subunit SMARCC1 OS=Homo sapiens OX=9606 GN=SMARCC1 PE=1 SV=3	8	0.0769361	2.43402	13.848	16.1792	15.8521	16.4577	14.8729	16.7423	16.5178	16.845
	Q9BTW9	TBCD_HUMAN Tubulin-specific chaperone D OS=Homo sapiens OX=9606 GN=TBCD PE=1 SV=2	10	0.0770282	0.653604	16.5633	15.5428	16.8602	15.9484	16.8384	15.9802	15.7389	16.0754
	Q96GA3	LTV1_HUMAN Protein LTV1 homolog OS=Homo sapiens OX=9606 GN=LTV1 PE=1 SV=1	3	0.07703	0.448009	15.3539	15.0073	15.4206	14.437	15.9137	13.4924	14.1855	13.3033
	Q9BPX5	ARP5L_HUMAN Actin-related protein 2/3 complex subunit 5-like protein OS=Homo sapiens OX=9606 GN=ARPC5L PE=1 SV=1	2	0.0771489	0.541368	17.8766	16.0342	16.3319	16.579	17.8769	16.5209	16.7616	16.1717
	Q16629	SRSF7_HUMAN Serine/arginine-rich splicing factor 7 OS=Homo sapiens OX=9606 GN=SRSF7 PE=1 SV=1	3	0.0773304	1.29164	20.1432	20.1451	19.7326	20.3898	19.521	20.0245	19.5914	19.9057
	Q15046	SYK_HUMAN Lysine--tRNA ligase OS=Homo sapiens OX=9606 GN=KARS1 PE=1 SV=3	15	0.0774604	1.24478	17.7209	17.8167	17.5178	17.7906	17.0367	17.7101	17.5485	17.77
	Q16531	DDB1_HUMAN DNA damage-binding protein 1 OS=Homo sapiens OX=9606 GN=DDB1 PE=1 SV=1	19	0.0779327	0.774453	18.1728	17.8641	17.618	17.7069	18.3008	17.5564	17.9668	17.456
	Q16270	IBP7_HUMAN Insulin-like growth factor-binding protein 7 OS=Homo sapiens OX=9606 GN=IGFBP7 PE=1 SV=1	6	0.0781916	0.650825	18.6598	17.2928	17.9068	17.4682	17.3072	17.3614	17.7952	17.0679
	O60502	OGA_HUMAN Protein O-GlcNAcase OS=Homo sapiens OX=9606 GN=OGA PE=1 SV=2	12	0.0784657	0.622051	18.6112	17.5433	17.5318	17.2104	18.0149	17.2162	17.3391	16.7875
	P10599	THIO_HUMAN Thioredoxin OS=Homo sapiens OX=9606 GN=TXN PE=1 SV=3	5	0.0791644	1.57792	17.9158	19.4287	18.526	18.7671	18.024	19.126	19.1219	18.898
	O60610	DIAP1_HUMAN Protein diaphanous homolog 1 OS=Homo sapiens OX=9606 GN=DIAPH1 PE=1 SV=2	19	0.0794054	1.31787	16.4957	17.3921	16.9147	17.2036	16.7284	17.1535	17.3484	17.3308
	Q99996	AKAP9_HUMAN A-kinase anchor protein 9 OS=Homo sapiens OX=9606 GN=AKAP9 PE=1 SV=4	10	0.0796893	0.391578	16.1789	13.2101	14.2464	13.8857	15.434	12.7952	14.0752	14.633
	Q13155	AIMP2_HUMAN Aminoacyl tRNA synthase complex-interacting multifunctional protein 2 OS=Homo sapiens OX=9606 GN=AIMP2 PE=1 SV=2	4	0.0797389	3.23593	14.304	17.3026	17.6539	17.7095	14.8815	17.6668	16.8771	17.8143
	Q709C8	VP13C_HUMAN Vacuolar protein sorting-associated protein 13C OS=Homo sapiens OX=9606 GN=VPS13C PE=1 SV=1	10	0.0798252	0.366065	17.4237	13.5212	16.7265	16.3479	16.6548	16.3172	16.8327	15.6521
	P15559	NQO1_HUMAN NAD(P)H dehydrogenase [quinone] 1 OS=Homo sapiens OX=9606 GN=NQO1 PE=1 SV=1	8	0.0803267	1.47903	19.4682	20.5983	20.4465	20.7824	20.5214	21.0257	20.4779	20.7662
	P82930	RT34_HUMAN 28S ribosomal protein S34, mitochondrial OS=Homo sapiens OX=9606 GN=MRPS34 PE=1 SV=2	3	0.0804933	0.495697	15.969	14.3743	15.2338	14.5455	15.7085	13.614	15.4844	15.8121
	A6NHR9	SMHD1_HUMAN Structural maintenance of chromosomes flexible hinge domain-containing protein 1 OS=Homo sapiens OX=9606 GN=SMCHD1 PE=1 SV=2	11	0.0809804	0.478652	18.5465	15.7629	17.4793	16.9966	18.0455	16.9498	16.5976	16.7079
	Q9UNF1	MAGD2_HUMAN Melanoma-associated antigen D2 OS=Homo sapiens OX=9606 GN=MAGED2 PE=1 SV=2	6	0.0812494	1.42482	17.6454	17.5446	16.7223	17.7498	17.0829	17.4563	16.6298	17.3728
	Q8NBF2	NHLC2_HUMAN NHL repeat-containing protein 2 OS=Homo sapiens OX=9606 GN=NHLRC2 PE=1 SV=1	5	0.0813299	0.485401	15.8679	13.5851	16.2308	14.2308	15.4385	15.1836	14.7272	15.0939
	O15523	DDX3Y_HUMAN ATP-dependent RNA helicase DDX3Y OS=Homo sapiens OX=9606 GN=DDX3Y PE=1 SV=2	2	0.0813505	1.38725	15.6472	16.1213	15.9112	16.0534	14.9234	15.9665	15.8126	16.0423
	P48643	TCPE_HUMAN T-complex protein 1 subunit epsilon OS=Homo sapiens OX=9606 GN=CCT5 PE=1 SV=1	22	0.0813617	1.15322	19.4232	19.9829	19.5937	19.7541	19.5657	19.5576	19.5489	19.6597
	Q96GG9	DCNL1_HUMAN DCN1-like protein 1 OS=Homo sapiens OX=9606 GN=DCUN1D1 PE=1 SV=1	2	0.0818559	1.37303	14.4865	15.3505	14.9391	15.0618	14.3011	15.0937	15.2121	15.2622
	P08579	RU2B_HUMAN U2 small nuclear ribonucleoprotein B OS=Homo sapiens OX=9606 GN=SNRPB2 PE=1 SV=1	5	0.0819162	0.288453	16.8715	14.4546	14.716	15.9087	16.7879	14.2719	15.9341	12.4999
	Q9NPQ8	RIC8A_HUMAN Synembryn-A OS=Homo sapiens OX=9606 GN=RIC8A PE=1 SV=3	6	0.0821448	0.699983	17.7488	16.8958	16.813	16.6443	16.9877	16.3521	17.337	16.9359
	O94888	UBXN7_HUMAN UBX domain-containing protein 7 OS=Homo sapiens OX=9606 GN=UBXN7 PE=1 SV=2	5	0.0826304	1.64261	15.4949	16.0028	15.6605	16.6811	14.7486	16.145	16.2592	16.1983
	Q9HD45	TM9S3_HUMAN Transmembrane 9 superfamily member 3 OS=Homo sapiens OX=9606 GN=TM9SF3 PE=1 SV=2	7	0.0831285	0.361107	18.6483	15.2464	16.4679	15.1536	17.8915	16.6569	16.0338	16.1065
	P56134	ATPK_HUMAN ATP synthase subunit f, mitochondrial OS=Homo sapiens OX=9606 GN=ATP5MF PE=1 SV=3	2	0.0831821	2.34783	16.705	18.9446	18.856	19.0274	17.0132	19.1534	18.914	19.2881
	Q10713	MPPA_HUMAN Mitochondrial-processing peptidase subunit alpha OS=Homo sapiens OX=9606 GN=PMPCA PE=1 SV=2	3	0.0834142	0.576029	15.2607	14.0969	14.4984	13.811	15.6237	14.7145	14.2531	13.8304
	Q99442	SEC62_HUMAN Translocation protein SEC62 OS=Homo sapiens OX=9606 GN=SEC62 PE=1 SV=1	2	0.0837838	4.5288	13.3484	16.4703	13.7862	17.5706	15.8439	13.7526	13.3275	17.229
	P46778	RL21_HUMAN 60S ribosomal protein L21 OS=Homo sapiens OX=9606 GN=RPL21 PE=1 SV=2	4	0.0839576	1.55915	19.6257	19.8153	20.1656	20.5037	18.9414	20.0934	19.697	20.5804
	P68363	TBA1B_HUMAN Tubulin alpha-1B chain OS=Homo sapiens OX=9606 GN=TUBA1B PE=1 SV=1	0	0.0841066	1.16013	23.3851	23.8545	23.7955	23.7709	23.4246	23.7931	23.6947	23.7384
	P62244	RS15A_HUMAN 40S ribosomal protein S15a OS=Homo sapiens OX=9606 GN=RPS15A PE=1 SV=2	3	0.0843451	0.535002	18.1912	17.9838	17.308	17.4991	18.863	17.1898	18.5959	16.6759
	P26368	U2AF2_HUMAN Splicing factor U2AF 65 kDa subunit OS=Homo sapiens OX=9606 GN=U2AF2 PE=1 SV=4	10	0.0843918	0.776896	18.5652	18.1435	18.5904	18.2407	18.599	17.9084	17.9529	17.9582
	Q7L0Y3	TM10C_HUMAN tRNA methyltransferase 10 homolog C OS=Homo sapiens OX=9606 GN=TRMT10C PE=1 SV=2	4	0.0844812	2.02605	14.4099	16.112	16.4381	16.6576	14.8873	16.5879	16.0558	16.5081
	Q92882	OSTF1_HUMAN Osteoclast-stimulating factor 1 OS=Homo sapiens OX=9606 GN=OSTF1 PE=1 SV=2	2	0.0847501	1.62896	14.5278	16.0252	15.3845	15.7867	15.6242	16.4672	15.9905	16.0638
	O95299	NDUAA_HUMAN NADH dehydrogenase [ubiquinone] 1 alpha subcomplex subunit 10, mitochondrial OS=Homo sapiens OX=9606 GN=NDUFA10 PE=1 SV=1	5	0.0848438	0.453775	16.1087	15.7593	16.1935	15.117	15.6118	15.717	16.9426	13.7035
	Q13085	ACACA_HUMAN Acetyl-CoA carboxylase 1 OS=Homo sapiens OX=9606 GN=ACACA PE=1 SV=2	20	0.0849376	0.671651	17.1338	16.3637	16.1562	16.2005	16.9657	16.0961	16.3621	15.6606
	Q9UI30	TR112_HUMAN Multifunctional methyltransferase subunit TRM112-like protein OS=Homo sapiens OX=9606 GN=TRMT112 PE=1 SV=1	3	0.0861926	0.439788	16.7711	14.2194	17.5584	15.6421	16.3065	16.6325	16.6419	16.0433
	Q96TA1	NIBA2_HUMAN Protein Niban 2 OS=Homo sapiens OX=9606 GN=NIBAN2 PE=1 SV=3	13	0.0863853	0.742461	19.0847	17.9471	18.5497	18.3533	18.7334	18.3596	18.1925	18.1819
	Q9Y394	DHRS7_HUMAN Dehydrogenase/reductase SDR family member 7 OS=Homo sapiens OX=9606 GN=DHRS7 PE=1 SV=1	2	0.0864809	1.50862	14.5496	14.0396	13.7036	14.9315	14.096	14.726	13.5866	14.6117
	P61586	RHOA_HUMAN Transforming protein RhoA OS=Homo sapiens OX=9606 GN=RHOA PE=1 SV=1	3	0.0867761	1.46344	20.0477	20.8964	20.8097	21.6078	21.0447	20.9625	20.6539	21.2868
	O95487	SC24B_HUMAN Protein transport protein Sec24B OS=Homo sapiens OX=9606 GN=SEC24B PE=1 SV=2	6	0.0872871	0.410786	16.9985	13.9251	16.0288	15.6811	15.3611	13.8148	15.8777	15.7109
	P53597	SUCA_HUMAN Succinate--CoA ligase [ADP/GDP-forming] subunit alpha, mitochondrial OS=Homo sapiens OX=9606 GN=SUCLG1 PE=1 SV=4	5	0.0873152	0.535437	15.6421	14.9462	16.1128	15.705	17.4996	15.845	16.325	15.4785
	Q92621	NU205_HUMAN Nuclear pore complex protein Nup205 OS=Homo sapiens OX=9606 GN=NUP205 PE=1 SV=3	20	0.0873695	0.489262	17.233	15.3483	16.8722	16.5547	18.1537	15.8361	16.2109	16.6054
	P17812	PYRG1_HUMAN CTP synthase 1 OS=Homo sapiens OX=9606 GN=CTPS1 PE=1 SV=2	15	0.0879083	1.38967	17.6096	18.5602	18.2734	18.3633	17.4331	18.1291	18.2405	18.4029
	Q6P4E1	CASC4_HUMAN Protein CASC4 OS=Homo sapiens OX=9606 GN=CASC4 PE=1 SV=2	2	0.0881394	0.58074	15.8244	13.6312	15.0728	14.6538	14.4272	14.2781	14.511	14.1363
	P17858	PFKAL_HUMAN ATP-dependent 6-phosphofructokinase, liver type OS=Homo sapiens OX=9606 GN=PFKL PE=1 SV=6	15	0.088184	0.813198	19.2424	18.8443	19.0239	18.7979	19.3277	18.7567	18.6868	18.6886
	P78417	GSTO1_HUMAN Glutathione S-transferase omega-1 OS=Homo sapiens OX=9606 GN=GSTO1 PE=1 SV=2	6	0.0882653	1.54253	16.6583	17.8851	17.6114	18.3907	17.6417	18.0566	18.0127	18.0931
	P46976	GLYG_HUMAN Glycogenin-1 OS=Homo sapiens OX=9606 GN=GYG1 PE=1 SV=4	2	0.0882795	1.2683	17.0714	17.1144	16.3532	17.114	16.9923	17.0575	16.6096	17.1121
	Q13547	HDAC1_HUMAN Histone deacetylase 1 OS=Homo sapiens OX=9606 GN=HDAC1 PE=1 SV=1	4	0.0883324	0.359285	18.3622	14.3789	17.4838	16.5854	17.9475	16.6099	16.1429	16.4549
	O43264	ZW10_HUMAN Centromere/kinetochore protein zw10 homolog OS=Homo sapiens OX=9606 GN=ZW10 PE=1 SV=3	10	0.0883792	0.792181	17.4492	16.8093	17.2964	16.8474	16.9471	16.575	16.8274	16.944
	Q96AT9	RPE_HUMAN Ribulose-phosphate 3-epimerase OS=Homo sapiens OX=9606 GN=RPE PE=1 SV=1	2	0.0884341	0.771613	17.4763	17.4223	17.1709	17.2167	17.4692	16.7797	17.5713	16.7729
	P22234	PUR6_HUMAN Multifunctional protein ADE2 OS=Homo sapiens OX=9606 GN=PAICS PE=1 SV=3	20	0.0885075	1.43197	19.7684	20.4479	20.6789	20.7038	19.8316	20.9174	20.5281	20.8099
	O75688	PPM1B_HUMAN Protein phosphatase 1B OS=Homo sapiens OX=9606 GN=PPM1B PE=1 SV=1	2	0.0886033	1.86717	15.1762	15.8745	15.74	15.75	13.7246	15.548	14.4767	15.5483
	P22570	ADRO_HUMAN NADPH:adrenodoxin oxidoreductase, mitochondrial OS=Homo sapiens OX=9606 GN=FDXR PE=1 SV=3	5	0.0893779	0.70751	17.5623	16.7855	16.8265	16.6427	16.9098	16.0485	16.7432	16.5684
	Q13136	LIPA1_HUMAN Liprin-alpha-1 OS=Homo sapiens OX=9606 GN=PPFIA1 PE=1 SV=1	7	0.0895757	0.478978	16.4831	13.8423	14.8681	15.3041	16.5357	14.7813	15.347	15.0583
	Q9BQE3	TBA1C_HUMAN Tubulin alpha-1C chain OS=Homo sapiens OX=9606 GN=TUBA1C PE=1 SV=1	2	0.0897202	4.12573	16.3307	20.0286	19.3227	18.9923	15.1803	19.3726	18.7996	19.4184
	Q9UNH7	SNX6_HUMAN Sorting nexin-6 OS=Homo sapiens OX=9606 GN=SNX6 PE=1 SV=1	5	0.0898959	0.52807	17.0167	14.9763	15.6418	16.1273	17.2563	16.1753	16.8965	15.8477
	P78330	SERB_HUMAN Phosphoserine phosphatase OS=Homo sapiens OX=9606 GN=PSPH PE=1 SV=2	4	0.0901488	1.33374	16.0758	16.6882	16.8128	16.532	16.3345	17.1083	16.1543	16.7106
	P54725	RD23A_HUMAN UV excision repair protein RAD23 homolog A OS=Homo sapiens OX=9606 GN=RAD23A PE=1 SV=1	3	0.0902693	0.291137	17.5866	14.5959	13.7862	14.4572	17.2279	14.8729	16.9674	14.5211
	P22033	MUTA_HUMAN Methylmalonyl-CoA mutase, mitochondrial OS=Homo sapiens OX=9606 GN=MMUT PE=1 SV=4	5	0.0904253	0.36661	14.8969	14.8197	15.5821	13.3441	17.4318	14.3914	14.5145	14.0793
	Q8WVM8	SCFD1_HUMAN Sec1 family domain-containing protein 1 OS=Homo sapiens OX=9606 GN=SCFD1 PE=1 SV=4	7	0.0904565	0.617598	16.5295	17.0054	16.9721	16.4575	17.4212	15.8995	17.7202	16.4995
	Q9UHQ4	BAP29_HUMAN B-cell receptor-associated protein 29 OS=Homo sapiens OX=9606 GN=BCAP29 PE=1 SV=2	3	0.0906275	1.53358	14.6659	14.7311	14.8885	15.9244	15.1838	15.4541	14.3164	15.4126
	P06865	HEXA_HUMAN Beta-hexosaminidase subunit alpha OS=Homo sapiens OX=9606 GN=HEXA PE=1 SV=2	9	0.090663	0.76445	17.5919	16.7936	16.7631	16.5329	16.965	16.8721	17.068	16.6393
	Q9H832	UBE2Z_HUMAN Ubiquitin-conjugating enzyme E2 Z OS=Homo sapiens OX=9606 GN=UBE2Z PE=1 SV=2	4	0.0909892	0.799774	17.9703	17.5469	17.8056	17.3338	17.3081	17.4222	17.6906	17.1825
	P49755	TMEDA_HUMAN Transmembrane emp24 domain-containing protein 10 OS=Homo sapiens OX=9606 GN=TMED10 PE=1 SV=2	3	0.091178	1.30173	18.5915	19.5591	18.8777	19.2118	18.5951	18.88	19.0788	19.0139
	P30041	PRDX6_HUMAN Peroxiredoxin-6 OS=Homo sapiens OX=9606 GN=PRDX6 PE=1 SV=3	12	0.0916959	1.13471	20.6585	21.1145	20.6566	20.8902	20.7254	20.8225	20.9258	20.8683
	Q6UN15	FIP1_HUMAN Pre-mRNA 3-end-processing factor FIP1 OS=Homo sapiens OX=9606 GN=FIP1L1 PE=1 SV=1	2	0.0918248	2.17901	14.0896	15.8689	16.2044	16.5218	14.1683	16.0789	15.7634	16.2509
	Q16181	SEPT7_HUMAN Septin-7 OS=Homo sapiens OX=9606 GN=SEPTIN7 PE=1 SV=2	10	0.0927235	1.24114	18.6636	18.7838	18.896	18.9177	18.1928	18.8298	18.3989	18.8667
	Q8IYD1	ERF3B_HUMAN Eukaryotic peptide chain release factor GTP-binding subunit ERF3B OS=Homo sapiens OX=9606 GN=GSPT2 PE=1 SV=2	1	0.0928774	2.02069	16.6923	18.4646	18.4461	18.4309	16.4486	18.4638	18.1787	18.4659
	Q9NPI6	DCP1A_HUMAN mRNA-decapping enzyme 1A OS=Homo sapiens OX=9606 GN=DCP1A PE=1 SV=3	4	0.0928945	1.45115	14.4971	14.1285	14.4508	14.8531	14.176	15.2221	13.9946	15.0637
	P52732	KIF11_HUMAN Kinesin-like protein KIF11 OS=Homo sapiens OX=9606 GN=KIF11 PE=1 SV=2	7	0.0930144	2.31458	15.4052	15.6255	15.9459	16.7124	15.3745	16.6263	13.4388	16.0433
	O75208	COQ9_HUMAN Ubiquinone biosynthesis protein COQ9, mitochondrial OS=Homo sapiens OX=9606 GN=COQ9 PE=1 SV=1	3	0.0941673	0.42799	16.558	15.3928	14.6956	15.3801	16.7416	13.9663	15.6793	14.0379
	Q9UJZ1	STML2_HUMAN Stomatin-like protein 2, mitochondrial OS=Homo sapiens OX=9606 GN=STOML2 PE=1 SV=1	9	0.094591	0.811411	18.057	17.575	18.187	17.5016	18.1603	18.0216	17.9036	18.0037
	Q96EP5	DAZP1_HUMAN DAZ-associated protein 1 OS=Homo sapiens OX=9606 GN=DAZAP1 PE=1 SV=1	6	0.0947022	1.28388	17.3276	17.9253	17.5081	17.7758	17.4786	17.7605	16.993	17.2877
	O14967	CLGN_HUMAN Calmegin OS=Homo sapiens OX=9606 GN=CLGN PE=1 SV=1	5	0.0947175	1.29071	17.1203	16.9401	16.8083	17.2427	16.589	16.8931	16.4577	17.372
	P32455	GBP1_HUMAN Guanylate-binding protein 1 OS=Homo sapiens OX=9606 GN=GBP1 PE=1 SV=2	5	0.0947654	1.38347	15.8583	17.1175	16.645	16.7054	16.3297	16.9668	16.8561	16.7726
	O43707	ACTN4_HUMAN Alpha-actinin-4 OS=Homo sapiens OX=9606 GN=ACTN4 PE=1 SV=2	38	0.0948681	1.20086	22.1129	22.3061	22.5363	22.4873	22.0482	22.5724	22.2801	22.668
	Q68CZ2	TENS3_HUMAN Tensin-3 OS=Homo sapiens OX=9606 GN=TNS3 PE=1 SV=2	13	0.0949358	0.819325	17.7371	17.2179	17.7158	17.4675	17.2899	17.1279	17.3353	17.1147
	P98155	VLDLR_HUMAN Very low-density lipoprotein receptor OS=Homo sapiens OX=9606 GN=VLDLR PE=1 SV=1	9	0.0949489	0.619607	17.6902	16.1973	16.1858	15.9585	17.0233	16.0499	16.3981	16.3296
	Q9Y2Z0	SGT1_HUMAN Protein SGT1 homolog OS=Homo sapiens OX=9606 GN=SUGT1 PE=1 SV=3	6	0.0954729	0.657128	17.6704	16.2784	16.5714	16.2381	16.2535	16.2157	16.7596	16.0996
	P30520	PURA2_HUMAN Adenylosuccinate synthetase isozyme 2 OS=Homo sapiens OX=9606 GN=ADSS2 PE=1 SV=3	9	0.0956599	1.15989	18.1143	18.6696	18.1818	18.4394	18.1522	18.26	18.295	18.2302
	Q86UY8	NT5D3_HUMAN 5-nucleotidase domain-containing protein 3 OS=Homo sapiens OX=9606 GN=NT5DC3 PE=1 SV=1	8	0.0957106	0.660569	16.207	15.2111	16.8306	15.7305	16.3293	16.1054	16.5493	16.4764
	P61009	SPCS3_HUMAN Signal peptidase complex subunit 3 OS=Homo sapiens OX=9606 GN=SPCS3 PE=1 SV=1	2	0.0957106	1.96761	13.9883	15.7999	15.6674	15.9708	14.0465	15.6261	15.7445	15.9557
	P51580	TPMT_HUMAN Thiopurine S-methyltransferase OS=Homo sapiens OX=9606 GN=TPMT PE=1 SV=1	6	0.0957437	2.0861	15.61	17.319	17.4802	17.6574	15.5497	17.6773	17.3519	17.5813
	P35606	COPB2_HUMAN Coatomer subunit beta OS=Homo sapiens OX=9606 GN=COPB2 PE=1 SV=2	18	0.0959489	0.939137	18.1396	18.0469	18.0157	17.9624	18.1918	17.9924	18.0332	18.0162
	Q92917	GPKOW_HUMAN G-patch domain and KOW motifs-containing protein OS=Homo sapiens OX=9606 GN=GPKOW PE=1 SV=2	3	0.0961081	0.64075	14.7064	14.4717	15.083	14.3057	14.3034	13.2282	14.4276	13.9461
	P62805	H4_HUMAN Histone H4 OS=Homo sapiens OX=9606 GN=H4C1 PE=1 SV=2	8	0.0961546	1.21949	23.1275	23.3744	23.6455	23.6788	23.0859	23.607	23.3101	23.6538
	Q96K17	BT3L4_HUMAN Transcription factor BTF3 homolog 4 OS=Homo sapiens OX=9606 GN=BTF3L4 PE=1 SV=1	6	0.0963474	0.145104	19.3009	15.4863	13.793	14.2653	18.3137	14.5725	16.1856	12.1299
	Q9H9B4	SFXN1_HUMAN Sideroflexin-1 OS=Homo sapiens OX=9606 GN=SFXN1 PE=1 SV=4	5	0.0963762	1.21281	17.9325	18.4763	18.4447	18.4633	18.5115	18.6242	18.2523	18.6907
	P15121	ALDR_HUMAN Aldo-keto reductase family 1 member B1 OS=Homo sapiens OX=9606 GN=AKR1B1 PE=1 SV=3	15	0.0965806	1.22169	19.7021	19.9072	19.2984	20.0884	19.9406	20.0079	19.7156	19.8088
	P49585	PCY1A_HUMAN Choline-phosphate cytidylyltransferase A OS=Homo sapiens OX=9606 GN=PCYT1A PE=1 SV=2	7	0.0967119	0.70634	16.9166	16.5411	16.1734	16.2814	17.2588	16.1119	16.6345	16.0426
	P06748	NPM_HUMAN Nucleophosmin OS=Homo sapiens OX=9606 GN=NPM1 PE=1 SV=2	10	0.0969349	1.47578	22.0279	22.9668	22.549	22.7184	21.7847	22.7616	22.9831	23.1439
	Q86VI3	IQGA3_HUMAN Ras GTPase-activating-like protein IQGAP3 OS=Homo sapiens OX=9606 GN=IQGAP3 PE=1 SV=2	10	0.0970443	0.246712	16.911	14.8972	16.8358	13.7507	15.9491	13.1925	12.9953	12.7744
	Q9H299	SH3L3_HUMAN SH3 domain-binding glutamic acid-rich-like protein 3 OS=Homo sapiens OX=9606 GN=SH3BGRL3 PE=1 SV=1	3	0.0971762	0.680994	16.9475	16.7441	17.039	16.6365	18.0659	16.7646	16.8874	16.5774
	Q8IUW5	RELL1_HUMAN RELT-like protein 1 OS=Homo sapiens OX=9606 GN=RELL1 PE=1 SV=1	2	0.097609	0.595635	15.4681	14.0984	14.4363	13.5843	14.6187	13.5614	13.7524	14.0415
	O43684	BUB3_HUMAN Mitotic checkpoint protein BUB3 OS=Homo sapiens OX=9606 GN=BUB3 PE=1 SV=1	7	0.0978904	0.675199	18.6827	17.9652	18.171	17.9708	18.8593	17.7245	17.6898	17.4757
	P50914	RL14_HUMAN 60S ribosomal protein L14 OS=Homo sapiens OX=9606 GN=RPL14 PE=1 SV=4	4	0.0982517	1.72843	17.7517	19.7314	19.5346	19.5094	18.6082	19.5303	19.2996	19.5808
	O43242	PSMD3_HUMAN 26S proteasome non-ATPase regulatory subunit 3 OS=Homo sapiens OX=9606 GN=PSMD3 PE=1 SV=2	17	0.0983218	0.821787	18.7124	18.4236	18.3494	18.4225	18.9528	18.1957	18.4669	18.3072
	Q16543	CDC37_HUMAN Hsp90 co-chaperone Cdc37 OS=Homo sapiens OX=9606 GN=CDC37 PE=1 SV=1	5	0.0990057	1.80258	18.3454	19.0241	18.6623	18.9691	17.0433	19.1186	19.0014	19.3408
	O95425	SVIL_HUMAN Supervillin OS=Homo sapiens OX=9606 GN=SVIL PE=1 SV=2	4	0.0990125	0.685587	15.0431	13.9913	14.979	14.9647	15.5703	14.9577	15.4213	14.9216
	P16152	CBR1_HUMAN Carbonyl reductase [NADPH] 1 OS=Homo sapiens OX=9606 GN=CBR1 PE=1 SV=3	7	0.0990832	1.29109	18.8002	19.3905	19.269	19.3106	18.5496	19.3655	19.333	19.3595
	P08243	ASNS_HUMAN Asparagine synthetase [glutamine-hydrolyzing] OS=Homo sapiens OX=9606 GN=ASNS PE=1 SV=4	6	0.0995062	0.726153	17.403	17.3759	17.0025	16.6246	17.7868	16.948	17.7073	17.1045
	Q14320	FA50A_HUMAN Protein FAM50A OS=Homo sapiens OX=9606 GN=FAM50A PE=1 SV=2	4	0.099536	0.734989	16.7	16.0033	16.1106	16.2804	16.9511	15.7793	16.5008	16.4226
	Q9UKV8	AGO2_HUMAN Protein argonaute-2 OS=Homo sapiens OX=9606 GN=AGO2 PE=1 SV=3	10	0.0995474	1.711	16.0109	16.1816	15.8277	16.1281	15.7264	16.4745	14.3115	16.1915
	Q8TEM1	PO210_HUMAN Nuclear pore membrane glycoprotein 210 OS=Homo sapiens OX=9606 GN=NUP210 PE=1 SV=3	8	0.100011	0.659186	16.6298	15.4111	16.8505	16.1	16.2789	16.006	15.6747	15.5119
	Q9NWH9	SLTM_HUMAN SAFB-like transcription modulator OS=Homo sapiens OX=9606 GN=SLTM PE=1 SV=2	5	0.100092	2.07034	16.2656	15.5556	15.2288	16.1681	13.9645	15.9984	14.2729	16.2092
	P13807	GYS1_HUMAN Glycogen [starch] synthase, muscle OS=Homo sapiens OX=9606 GN=GYS1 PE=1 SV=2	10	0.100187	1.20006	17.1689	17.4163	17.4147	17.2647	16.8455	17.4543	16.9402	17.2864
	Q06136	KDSR_HUMAN 3-ketodihydrosphingosine reductase OS=Homo sapiens OX=9606 GN=KDSR PE=1 SV=1	2	0.100728	2.05924	14.87	16.0158	16.7136	16.1829	14.9123	16.3883	14.2482	16.3255
	Q15628	TRADD_HUMAN Tumor necrosis factor receptor type 1-associated DEATH domain protein OS=Homo sapiens OX=9606 GN=TRADD PE=1 SV=2	3	0.100756	0.839414	16.2648	15.816	15.947	15.7156	15.778	15.8789	16.2922	15.8614
	Q9ULV4	COR1C_HUMAN Coronin-1C OS=Homo sapiens OX=9606 GN=CORO1C PE=1 SV=1	12	0.1011	1.42245	18.2421	18.6058	18.0464	18.8065	18.6307	18.3286	17.4667	18.6786
	P05388	RLA0_HUMAN 60S acidic ribosomal protein P0 OS=Homo sapiens OX=9606 GN=RPLP0 PE=1 SV=1;sp	6	0.101111	1.51688	19.4363	20.7739	20.6179	20.6084	20.0371	20.8823	20.7463	20.9775
	Q92747	ARC1A_HUMAN Actin-related protein 2/3 complex subunit 1A OS=Homo sapiens OX=9606 GN=ARPC1A PE=2 SV=2	9	0.101541	0.777031	18.1598	17.3134	17.5102	17.432	17.3193	17.2789	17.6515	17.1605
	P01893	HLAH_HUMAN Putative HLA class I histocompatibility antigen, alpha chain H OS=Homo sapiens OX=9606 GN=HLA-H PE=5 SV=3	1	0.101752	0.343019	16.3867	13.5471	17.2604	15.6857	15.7169	16.0152	15.4551	13.3964
	P53634	CATC_HUMAN Dipeptidyl peptidase 1 OS=Homo sapiens OX=9606 GN=CTSC PE=1 SV=2	3	0.101965	0.548748	18.471	17.179	17.8416	18.242	18.408	17.5084	19.6537	17.9819
	Q9NR50	EI2BG_HUMAN Translation initiation factor eIF-2B subunit gamma OS=Homo sapiens OX=9606 GN=EIF2B3 PE=1 SV=1	4	0.10215	0.662674	16.8972	15.5628	15.9792	15.7176	15.675	15.0917	15.8377	15.6424
	Q12765	SCRN1_HUMAN Secernin-1 OS=Homo sapiens OX=9606 GN=SCRN1 PE=1 SV=2	5	0.102358	0.672265	18.1266	17.6568	17.3179	17.7445	17.9691	16.8589	18.2354	17.0971
	Q9UIG0	BAZ1B_HUMAN Tyrosine-protein kinase BAZ1B OS=Homo sapiens OX=9606 GN=BAZ1B PE=1 SV=2	16	0.102659	0.47104	17.7848	15.1017	16.0762	15.9721	17.3287	15.774	15.5008	15.4984
	P23284	PPIB_HUMAN Peptidyl-prolyl cis-trans isomerase B OS=Homo sapiens OX=9606 GN=PPIB PE=1 SV=2	8	0.102953	1.31115	20.9542	21.0821	21.397	21.3485	20.541	21.5882	20.9381	21.3749
	Q16881	TRXR1_HUMAN Thioredoxin reductase 1, cytoplasmic OS=Homo sapiens OX=9606 GN=TXNRD1 PE=1 SV=3	15	0.102958	1.43082	18.5089	19.5347	19.5837	19.552	19.0435	19.8491	19.5638	19.8315
	P52735	VAV2_HUMAN Guanine nucleotide exchange factor VAV2 OS=Homo sapiens OX=9606 GN=VAV2 PE=1 SV=2	3	0.103216	1.72067	14.826	14.5411	13.5889	15.4462	14.745	15.2567	13.6131	14.6609
	P48426	PI42A_HUMAN Phosphatidylinositol 5-phosphate 4-kinase type-2 alpha OS=Homo sapiens OX=9606 GN=PIP4K2A PE=1 SV=2	3	0.103529	0.73816	16.4754	15.6848	15.508	15.3546	15.8599	15.4796	15.6953	15.2676
	Q96SB3	NEB2_HUMAN Neurabin-2 OS=Homo sapiens OX=9606 GN=PPP1R9B PE=1 SV=3	7	0.103751	1.61162	15.5971	16.5448	16.8652	16.7046	15.408	16.5719	16.3042	17.1074
	P18887	XRCC1_HUMAN DNA repair protein XRCC1 OS=Homo sapiens OX=9606 GN=XRCC1 PE=1 SV=2	3	0.104449	0.467757	15.9383	14.6368	14.363	14.3619	14.9123	12.657	14.4314	13.6046
	Q14938	NFIX_HUMAN Nuclear factor 1 X-type OS=Homo sapiens OX=9606 GN=NFIX PE=1 SV=2;sp	2	0.105185	2.19885	13.7012	14.3298	13.8602	16.156	14.419	15.9743	15.5987	15.666
	Q8TAT6	NPL4_HUMAN Nuclear protein localization protein 4 homolog OS=Homo sapiens OX=9606 GN=NPLOC4 PE=1 SV=3	11	0.105391	0.815066	19.1969	18.6828	18.5254	18.5644	18.7318	18.5188	19.0346	18.5426
	P38646	GRP75_HUMAN Stress-70 protein, mitochondrial OS=Homo sapiens OX=9606 GN=HSPA9 PE=1 SV=2	23	0.105697	1.28386	20.1499	20.7752	20.5427	20.4174	19.8641	20.6917	20.5917	20.7061
	P23258	TBG1_HUMAN Tubulin gamma-1 chain OS=Homo sapiens OX=9606 GN=TUBG1 PE=1 SV=2;sp	6	0.105722	0.511051	18.2799	16.8925	16.6527	16.8275	18.211	16.1917	16.6629	16.021
	Q7Z739	YTHD3_HUMAN YTH domain-containing family protein 3 OS=Homo sapiens OX=9606 GN=YTHDF3 PE=1 SV=1	3	0.106781	0.748711	16.9356	16.5423	16.277	16.4323	17.1199	16.5041	16.8168	16.0005
	Q9BTV4	TMM43_HUMAN Transmembrane protein 43 OS=Homo sapiens OX=9606 GN=TMEM43 PE=1 SV=1	6	0.107059	0.780089	17.3063	17.3926	17.7896	17.5288	17.7605	17.3843	17.7285	16.8461
	Q9UBI6	GBG12_HUMAN Guanine nucleotide-binding protein G(I)/G(S)/G(O) subunit gamma-12 OS=Homo sapiens OX=9606 GN=GNG12 PE=1 SV=3	3	0.107109	0.274875	18.7556	13.658	17.8932	17.6089	18.4731	17.613	18.5326	17.322
	Q04917	1433F_HUMAN 14-3-3 protein eta OS=Homo sapiens OX=9606 GN=YWHAH PE=1 SV=4	7	0.107819	1.32203	17.7769	18.3755	18.5129	18.4748	17.7728	18.5543	18.4309	18.6999
	O15084	ANR28_HUMAN Serine/threonine-protein phosphatase 6 regulatory ankyrin repeat subunit A OS=Homo sapiens OX=9606 GN=ANKRD28 PE=1 SV=5	4	0.107859	0.605515	14.1819	13.7492	14.7488	13.2324	15.0121	13.8875	14.6894	14.868
	Q15233	NONO_HUMAN Non-POU domain-containing octamer-binding protein OS=Homo sapiens OX=9606 GN=NONO PE=1 SV=4	14	0.108567	1.35324	20.7454	21.3685	21.2054	21.1149	20.1547	21.1884	20.7871	20.9665
	Q7Z6Z7	HUWE1_HUMAN E3 ubiquitin-protein ligase HUWE1 OS=Homo sapiens OX=9606 GN=HUWE1 PE=1 SV=3	46	0.108957	0.626262	17.8395	16.3146	17.4125	17.1169	18.3386	17.1955	17.0488	17.3119
	P0DN76	U2AF5_HUMAN Splicing factor U2AF 35 kDa subunit-like protein OS=Homo sapiens OX=9606 GN=U2AF1L5 PE=1 SV=1;sp	6	0.1091	0.754708	17.913	17.6512	17.3005	16.9017	17.8189	17.0819	17.6552	17.4287
	P04632	CPNS1_HUMAN Calpain small subunit 1 OS=Homo sapiens OX=9606 GN=CAPNS1 PE=1 SV=1	6	0.109542	1.25996	19.1296	19.3606	18.458	19.1012	18.6728	19.0914	19.1107	19.1516
	P41240	CSK_HUMAN Tyrosine-protein kinase CSK OS=Homo sapiens OX=9606 GN=CSK PE=1 SV=1	6	0.110206	0.684081	16.3554	15.8028	15.4121	15.4188	16.7547	15.6598	16.189	15.6389
	P62495	ERF1_HUMAN Eukaryotic peptide chain release factor subunit 1 OS=Homo sapiens OX=9606 GN=ETF1 PE=1 SV=3	10	0.110445	1.2097	17.0998	17.7866	17.4401	17.837	17.3083	17.3754	17.4924	17.4401
	P19623	SPEE_HUMAN Spermidine synthase OS=Homo sapiens OX=9606 GN=SRM PE=1 SV=1	8	0.110576	0.572311	17.1548	15.1115	16.0684	16.0735	17.1875	16.2228	16.9622	16.7444
	Q96S82	UBL7_HUMAN Ubiquitin-like protein 7 OS=Homo sapiens OX=9606 GN=UBL7 PE=1 SV=2	2	0.110618	0.463744	14.3641	14.0211	15.1151	11.9932	13.1004	13.1556	14.3483	13.3236
	Q92890	UFD1_HUMAN Ubiquitin recognition factor in ER-associated degradation protein 1 OS=Homo sapiens OX=9606 GN=UFD1 PE=1 SV=3	6	0.110635	1.68592	16.7105	17.9133	18.0865	18.0297	16.448	17.8835	17.7562	18.189
	P06756	ITAV_HUMAN Integrin alpha-V OS=Homo sapiens OX=9606 GN=ITGAV PE=1 SV=2	14	0.110901	0.788652	17.6987	17.4838	17.9604	17.1944	17.433	17.6232	18.151	17.5713
	O14818	PSA7_HUMAN Proteasome subunit alpha type-7 OS=Homo sapiens OX=9606 GN=PSMA7 PE=1 SV=1;sp	8	0.111141	1.57707	18.5192	19.0192	19.05	18.8306	17.772	18.7277	17.5417	18.9343
	P38159	RBMX_HUMAN RNA-binding motif protein, X chromosome OS=Homo sapiens OX=9606 GN=RBMX PE=1 SV=3	1	0.111347	1.43565	18.1836	18.8409	18.0575	19.0305	18.819	19.0719	19.1471	19.3506
	Q9NZQ3	SPN90_HUMAN NCK-interacting protein with SH3 domain OS=Homo sapiens OX=9606 GN=NCKIPSD PE=1 SV=1	6	0.111732	0.463853	15.207	15.1613	14.9872	15.0219	16.5876	13.1019	15.6984	14.7621
	Q14204	DYHC1_HUMAN Cytoplasmic dynein 1 heavy chain 1 OS=Homo sapiens OX=9606 GN=DYNC1H1 PE=1 SV=5	124	0.111885	1.05493	18.8651	18.8585	18.7148	18.8583	18.7852	18.8138	18.6863	18.8294
	P36871	PGM1_HUMAN Phosphoglucomutase-1 OS=Homo sapiens OX=9606 GN=PGM1 PE=1 SV=3	14	0.112128	0.580714	18.6723	17.4589	17.5145	17.3706	19.2145	17.5148	17.5642	17.4848
	P53582	MAP11_HUMAN Methionine aminopeptidase 1 OS=Homo sapiens OX=9606 GN=METAP1 PE=1 SV=2	5	0.112824	0.648774	14.9899	14.7259	15.136	15.1085	16.3264	15.0731	15.4183	14.4663
	P61160	ARP2_HUMAN Actin-related protein 2 OS=Homo sapiens OX=9606 GN=ACTR2 PE=1 SV=1	9	0.112829	0.75483	19.3126	18.9817	18.9041	18.9019	19.8663	19.0099	19.1209	18.6873
	Q9BPY3	F118B_HUMAN Protein FAM118B OS=Homo sapiens OX=9606 GN=FAM118B PE=1 SV=1	2	0.113029	0.448385	13.6271	14.5981	16.276	13.269	14.8037	13.9938	15.2934	13.5104
	P29144	TPP2_HUMAN Tripeptidyl-peptidase 2 OS=Homo sapiens OX=9606 GN=TPP2 PE=1 SV=4	11	0.113528	1.24387	16.6727	16.4743	16.3118	16.9916	16.5257	16.5717	16.1291	16.8611
	P51452	DUS3_HUMAN Dual specificity protein phosphatase 3 OS=Homo sapiens OX=9606 GN=DUSP3 PE=1 SV=1	4	0.113846	1.44549	15.979	17.3696	17.2494	17.1677	16.4769	17.2249	16.9473	17.0167
	Q96P47	AGAP3_HUMAN Arf-GAP with GTPase, ANK repeat and PH domain-containing protein 3 OS=Homo sapiens OX=9606 GN=AGAP3 PE=1 SV=2	3	0.114142	0.50321	14.0461	14.7993	15.6555	13.38	16.0626	14.5763	15.149	14.1945
	Q9ULX3	NOB1_HUMAN RNA-binding protein NOB1 OS=Homo sapiens OX=9606 GN=NOB1 PE=1 SV=1	2	0.114212	0.751674	14.7075	14.4481	14.4567	13.987	14.6149	14.1	14.0405	13.6372
	Q9UNK0	STX8_HUMAN Syntaxin-8 OS=Homo sapiens OX=9606 GN=STX8 PE=1 SV=2	2	0.114603	0.636856	15.9612	14.611	15.6841	14.9686	14.9506	15.5339	16.3409	15.2196
	O95905	ECD_HUMAN Protein ecdysoneless homolog OS=Homo sapiens OX=9606 GN=ECD PE=1 SV=1	2	0.11463	0.646498	15.036	15.3272	15.6155	14.9217	16.602	14.9457	15.5229	15.0646
	Q9NUY8	TBC23_HUMAN TBC1 domain family member 23 OS=Homo sapiens OX=9606 GN=TBC1D23 PE=1 SV=3	5	0.114654	2.56267	16.4587	16.879	15.4341	15.9625	14.1573	15.7545	13.3085	16.1932
	Q15185	TEBP_HUMAN Prostaglandin E synthase 3 OS=Homo sapiens OX=9606 GN=PTGES3 PE=1 SV=1	4	0.115104	1.15962	19.7192	19.7098	19.3186	19.8838	19.3515	19.5679	19.5771	19.6595
	P43304	GPDM_HUMAN Glycerol-3-phosphate dehydrogenase, mitochondrial OS=Homo sapiens OX=9606 GN=GPD2 PE=1 SV=3	22	0.115222	1.15948	18.2694	18.5527	18.7018	18.5565	18.1989	18.6232	18.2754	18.567
	Q9Y5M8	SRPRB_HUMAN Signal recognition particle receptor subunit beta OS=Homo sapiens OX=9606 GN=SRPRB PE=1 SV=3	5	0.115304	0.789114	17.8587	17.9731	17.9478	17.5465	18.3123	18.034	18.4492	17.6475
	O95336	6PGL_HUMAN 6-phosphogluconolactonase OS=Homo sapiens OX=9606 GN=PGLS PE=1 SV=2	5	0.115473	1.37897	17.3629	17.875	17.8262	17.8018	16.8681	18.1552	17.9087	17.9882
	Q9Y6M7	S4A7_HUMAN Sodium bicarbonate cotransporter 3 OS=Homo sapiens OX=9606 GN=SLC4A7 PE=1 SV=2	6	0.115501	0.766813	18.1955	18.1833	17.9587	17.4907	18.0564	17.7794	18.6453	17.8703
	Q9HC78	ZBT20_HUMAN Zinc finger and BTB domain-containing protein 20 OS=Homo sapiens OX=9606 GN=ZBTB20 PE=1 SV=3	4	0.116086	0.520883	15.7551	13.1254	14.2152	14.7909	15.1951	14.7641	15.1124	13.8335
	Q4VC31	CCD58_HUMAN Coiled-coil domain-containing protein 58 OS=Homo sapiens OX=9606 GN=CCDC58 PE=1 SV=1	2	0.116324	0.411131	15.5497	13.7979	16.3197	15.9897	15.0539	14.5274	15.4545	12.9334
	O95297	MPZL1_HUMAN Myelin protein zero-like protein 1 OS=Homo sapiens OX=9606 GN=MPZL1 PE=1 SV=1	2	0.116405	2.84437	14.619	16.0045	17.2787	16.3395	14.1465	16.7193	13.6868	16.7001
	Q9Y613	FHOD1_HUMAN FH1/FH2 domain-containing protein 1 OS=Homo sapiens OX=9606 GN=FHOD1 PE=1 SV=3	8	0.116657	0.218318	17.1751	10.7774	16.0636	14.7355	16.4664	14.5151	14.034	14.9292
	O76021	RL1D1_HUMAN Ribosomal L1 domain-containing protein 1 OS=Homo sapiens OX=9606 GN=RSL1D1 PE=1 SV=3	6	0.116995	1.31208	17.2621	18.0459	17.573	18.348	18.0091	17.7167	17.8812	18.1823
	O76003	GLRX3_HUMAN Glutaredoxin-3 OS=Homo sapiens OX=9606 GN=GLRX3 PE=1 SV=2	6	0.117072	1.18657	17.71	18.0262	18.05	17.8752	17.4166	18.0418	17.7446	17.9652
	Q9BXW7	HDHD5_HUMAN Haloacid dehalogenase-like hydrolase domain-containing 5 OS=Homo sapiens OX=9606 GN=HDHD5 PE=1 SV=1	3	0.117091	2.08755	14.2991	16.3459	16.178	16.2524	13.8786	15.9159	15.8894	15.978
	Q9P2K8	E2AK4_HUMAN eIF-2-alpha kinase GCN2 OS=Homo sapiens OX=9606 GN=EIF2AK4 PE=1 SV=3	4	0.117964	1.79579	15.4569	15.4148	13.8755	15.4074	15.0317	15.2041	13.5245	15.2408
	Q09028	RBBP4_HUMAN Histone-binding protein RBBP4 OS=Homo sapiens OX=9606 GN=RBBP4 PE=1 SV=3	4	0.118092	0.723271	19.5169	18.6393	18.629	18.6337	19.4109	18.4144	18.5688	18.5687
	Q16555	DPYL2_HUMAN Dihydropyrimidinase-related protein 2 OS=Homo sapiens OX=9606 GN=DPYSL2 PE=1 SV=1	15	0.119649	0.650465	19.2925	18.2753	18.295	18.2029	19.404	18.1578	18.097	17.9707
	Q9NRR5	UBQL4_HUMAN Ubiquilin-4 OS=Homo sapiens OX=9606 GN=UBQLN4 PE=1 SV=2	3	0.119779	0.713339	16.8466	15.8704	15.7509	15.7592	16.3981	15.7416	15.8295	15.5046
	Q7L014	DDX46_HUMAN Probable ATP-dependent RNA helicase DDX46 OS=Homo sapiens OX=9606 GN=DDX46 PE=1 SV=2	9	0.119835	2.05845	15.3438	15.5899	13.8277	16.7846	16.3337	16.2125	15.341	16.4255
	Q9UMS4	PRP19_HUMAN Pre-mRNA-processing factor 19 OS=Homo sapiens OX=9606 GN=PRPF19 PE=1 SV=1	7	0.11997	0.80923	19.4365	18.9531	18.872	18.7687	19.1475	18.5749	18.7729	18.7108
	Q9H3N1	TMX1_HUMAN Thioredoxin-related transmembrane protein 1 OS=Homo sapiens OX=9606 GN=TMX1 PE=1 SV=1	6	0.12006	1.37942	16.8245	17.0451	16.6145	17.1797	15.8995	17.0868	17.0684	16.9516
	Q96RQ3	MCCA_HUMAN Methylcrotonoyl-CoA carboxylase subunit alpha, mitochondrial OS=Homo sapiens OX=9606 GN=MCCC1 PE=1 SV=3	3	0.120238	2.99173	12.4905	16.7888	16.0582	16.0656	15.3769	15.1425	13.735	15.9876
	O95373	IPO7_HUMAN Importin-7 OS=Homo sapiens OX=9606 GN=IPO7 PE=1 SV=1	21	0.120635	1.19518	19.0209	19.3352	19.127	19.271	18.6087	19.2002	19.251	19.2302
	P54886	P5CS_HUMAN Delta-1-pyrroline-5-carboxylate synthase OS=Homo sapiens OX=9606 GN=ALDH18A1 PE=1 SV=2	22	0.120791	0.811429	18.4604	17.8702	18.2041	18.0599	18.4685	17.9202	17.7848	17.8616
	P00568	KAD1_HUMAN Adenylate kinase isoenzyme 1 OS=Homo sapiens OX=9606 GN=AK1 PE=1 SV=3	5	0.120878	0.487049	16.7381	16.1625	16.0151	15.8226	16.8221	16.0303	16.4355	13.844
	P00390	GSHR_HUMAN Glutathione reductase, mitochondrial OS=Homo sapiens OX=9606 GN=GSR PE=1 SV=2	6	0.121094	0.44281	18.2329	15.4089	17.4349	16.401	18.2632	16.2923	15.8544	16.9821
	Q9UJS0	CMC2_HUMAN Calcium-binding mitochondrial carrier protein Aralar2 OS=Homo sapiens OX=9606 GN=SLC25A13 PE=1 SV=2	11	0.121106	1.56951	16.2044	17.293	17.4122	17.6628	17.6519	18.0787	16.8454	17.6806
	O75569	PRKRA_HUMAN Interferon-inducible double-stranded RNA-dependent protein kinase activator A OS=Homo sapiens OX=9606 GN=PRKRA PE=1 SV=1	3	0.121308	0.209706	17.6372	17.5197	17.882	17.4229	17.5909	13.9126	17.3661	12.6067
	P23634	AT2B4_HUMAN Plasma membrane calcium-transporting ATPase 4 OS=Homo sapiens OX=9606 GN=ATP2B4 PE=1 SV=2	11	0.121427	0.845501	18.4344	18.1654	18.3884	18.0917	18.7134	18.2108	18.0691	18.1688
	P62330	ARF6_HUMAN ADP-ribosylation factor 6 OS=Homo sapiens OX=9606 GN=ARF6 PE=1 SV=2	5	0.121925	1.31079	16.2142	17.0706	17.0061	17.2341	16.3247	16.7748	16.7448	16.772
	Q13242	SRSF9_HUMAN Serine/arginine-rich splicing factor 9 OS=Homo sapiens OX=9606 GN=SRSF9 PE=1 SV=1	4	0.121974	0.720858	15.8388	15.1499	15.7526	15.7549	16.1035	15.7034	16.673	15.8707
	O00203	AP3B1_HUMAN AP-3 complex subunit beta-1 OS=Homo sapiens OX=9606 GN=AP3B1 PE=1 SV=3	5	0.122119	1.28713	17.5088	17.8294	18.0162	17.8161	17.0463	17.8434	17.3946	17.9338
	P50552	VASP_HUMAN Vasodilator-stimulated phosphoprotein OS=Homo sapiens OX=9606 GN=VASP PE=1 SV=3	9	0.122291	1.1805	17.7056	17.7975	17.9711	18.0869	17.987	18.2895	17.6611	18.1085
	Q96GC9	VMP1_HUMAN Vacuole membrane protein 1 OS=Homo sapiens OX=9606 GN=VMP1 PE=1 SV=1	2	0.122475	1.69399	18.2076	18.8253	17.8457	18.5736	18.187	18.1045	16.542	18.3207
	Q13586	STIM1_HUMAN Stromal interaction molecule 1 OS=Homo sapiens OX=9606 GN=STIM1 PE=1 SV=3	8	0.122582	2.12282	16.1134	16.681	16.2759	16.2448	15.2025	16.5505	13.6943	16.1537
	P18754	RCC1_HUMAN Regulator of chromosome condensation OS=Homo sapiens OX=9606 GN=RCC1 PE=1 SV=1	7	0.122671	0.710279	17.3129	16.2983	16.0386	16.1319	16.7133	16.2216	16.5072	15.9461
	Q5JSH3	WDR44_HUMAN WD repeat-containing protein 44 OS=Homo sapiens OX=9606 GN=WDR44 PE=1 SV=1	8	0.122747	0.784881	17.5324	16.6887	17.0049	16.6029	16.6395	16.8353	16.9315	16.5836
	Q9NYJ8	TAB2_HUMAN TGF-beta-activated kinase 1 and MAP3K7-binding protein 2 OS=Homo sapiens OX=9606 GN=TAB2 PE=1 SV=1	2	0.122864	0.542164	15.728	14.7348	14.3333	14.6623	16.2702	14.1282	14.6693	13.9426
	Q05209	PTN12_HUMAN Tyrosine-protein phosphatase non-receptor type 12 OS=Homo sapiens OX=9606 GN=PTPN12 PE=1 SV=3	14	0.123114	1.33469	17.6904	18.319	18.4855	18.3702	17.5445	18.5457	18.2823	18.434
	Q13618	CUL3_HUMAN Cullin-3 OS=Homo sapiens OX=9606 GN=CUL3 PE=1 SV=2	3	0.123174	0.55793	14.6859	13.5631	13.7109	13.6418	15.8469	13.9183	14.1626	13.9158
	O94905	ERLN2_HUMAN Erlin-2 OS=Homo sapiens OX=9606 GN=ERLIN2 PE=1 SV=1	3	0.123915	0.392393	15.1613	13.3904	14.2688	13.7829	15.6607	14.488	17.2625	15.2934
	Q9NY93	DDX56_HUMAN Probable ATP-dependent RNA helicase DDX56 OS=Homo sapiens OX=9606 GN=DDX56 PE=1 SV=1	3	0.123924	0.359128	16.9386	14.9794	13.9911	13.471	16.5366	13.7441	16.1998	15.562
	Q96SU4	OSBL9_HUMAN Oxysterol-binding protein-related protein 9 OS=Homo sapiens OX=9606 GN=OSBPL9 PE=1 SV=2	5	0.124006	1.66808	14.7049	15.8871	16.2302	16.8551	15.1245	16.2179	15.8731	15.9253
	Q96GC5	RM48_HUMAN 39S ribosomal protein L48, mitochondrial OS=Homo sapiens OX=9606 GN=MRPL48 PE=1 SV=2	2	0.124057	0.530601	16.6621	13.9202	16.3892	15.8646	15.8183	15.9683	15.9477	15.4068
	Q8WVV9	HNRLL_HUMAN Heterogeneous nuclear ribonucleoprotein L-like OS=Homo sapiens OX=9606 GN=HNRNPLL PE=1 SV=1	7	0.124201	0.347056	16.4469	13.0711	17.6837	16.3613	16.1351	16.1382	17.3371	15.925
	P62993	GRB2_HUMAN Growth factor receptor-bound protein 2 OS=Homo sapiens OX=9606 GN=GRB2 PE=1 SV=1	6	0.124339	0.722624	16.3639	16.1224	16.6942	16.7012	17.3055	16.4093	17.2895	16.5456
	Q9P275	UBP36_HUMAN Ubiquitin carboxyl-terminal hydrolase 36 OS=Homo sapiens OX=9606 GN=USP36 PE=1 SV=4	2	0.124521	0.418802	15.8168	11.9648	15.185	14.5171	14.8243	14.2266	13.9185	14.0135
	Q9NX47	MARH5_HUMAN E3 ubiquitin-protein ligase MARCHF5 OS=Homo sapiens OX=9606 GN=MARCHF5 PE=1 SV=1	5	0.124896	0.481344	15.8435	15.4289	14.689	15.533	16.6639	14.0716	16.0047	13.9482
	P06132	DCUP_HUMAN Uroporphyrinogen decarboxylase OS=Homo sapiens OX=9606 GN=UROD PE=1 SV=2	4	0.12495	0.434052	16.6538	13.6994	15.2385	14.2684	16.4999	14.7613	13.9885	14.8355
	Q86UP2	KTN1_HUMAN Kinectin OS=Homo sapiens OX=9606 GN=KTN1 PE=1 SV=1	29	0.125677	0.889748	18.0201	17.6524	17.8629	17.6531	17.8422	17.7178	17.577	17.6047
	P53004	BIEA_HUMAN Biliverdin reductase A OS=Homo sapiens OX=9606 GN=BLVRA PE=1 SV=2	5	0.125766	2.31274	15.7035	17.8381	16.6748	17.0166	14.2676	16.872	17.1867	16.9443
	P61019	RAB2A_HUMAN Ras-related protein Rab-2A OS=Homo sapiens OX=9606 GN=RAB2A PE=1 SV=1	5	0.125903	1.16972	18.5526	18.9013	19.0332	18.8319	18.8026	19.1244	18.6126	19.048
	P46777	RL5_HUMAN 60S ribosomal protein L5 OS=Homo sapiens OX=9606 GN=RPL5 PE=1 SV=3	8	0.126124	1.39999	19.3934	20.4445	20.5404	20.6099	20.4942	20.6918	20.1286	20.7521
	Q86SF2	GALT7_HUMAN N-acetylgalactosaminyltransferase 7 OS=Homo sapiens OX=9606 GN=GALNT7 PE=1 SV=1	4	0.126265	1.7831	14.6105	13.6376	14.1701	15.2347	13.7697	15.3573	13.5779	15.2362
	Q96FJ2	DYL2_HUMAN Dynein light chain 2, cytoplasmic OS=Homo sapiens OX=9606 GN=DYNLL2 PE=1 SV=1	1	0.126321	0.370771	14.6155	15.8605	15.3159	14.1219	17.2022	14.868	17.1347	13.6924
	Q12906	ILF3_HUMAN Interleukin enhancer-binding factor 3 OS=Homo sapiens OX=9606 GN=ILF3 PE=1 SV=3	25	0.126505	1.38591	18.6364	19.639	19.7725	19.6999	19.419	19.9207	19.5779	20.0296
	O00267	SPT5H_HUMAN Transcription elongation factor SPT5 OS=Homo sapiens OX=9606 GN=SUPT5H PE=1 SV=1	11	0.126609	0.76613	17.3384	16.485	16.5894	16.5172	17.0163	16.4286	16.3843	16.3602
	Q8IWE2	NXP20_HUMAN Protein NOXP20 OS=Homo sapiens OX=9606 GN=FAM114A1 PE=1 SV=2	6	0.126799	0.704658	17.8115	17.1823	16.8888	17.1281	18.1595	17.0385	17.8833	17.3742
	P08240	SRPRA_HUMAN Signal recognition particle receptor subunit alpha OS=Homo sapiens OX=9606 GN=SRPRA PE=1 SV=2	4	0.127012	1.54084	15.8959	15.9405	16.5626	16.8332	15.1923	16.8248	16.0494	16.5966
	Q9H3S7	PTN23_HUMAN Tyrosine-protein phosphatase non-receptor type 23 OS=Homo sapiens OX=9606 GN=PTPN23 PE=1 SV=1	4	0.127116	1.78259	13.578	15.483	14.4788	15.5267	14.757	13.9498	13.6627	14.8529
	Q4V328	GRAP1_HUMAN GRIP1-associated protein 1 OS=Homo sapiens OX=9606 GN=GRIPAP1 PE=1 SV=2	6	0.127212	0.501811	15.9562	15.5074	16.0571	15.1896	17.7176	15.39	15.1392	14.804
	P05121	PAI1_HUMAN Plasminogen activator inhibitor 1 OS=Homo sapiens OX=9606 GN=SERPINE1 PE=1 SV=1	4	0.127266	1.76104	14.7472	15.6122	14.6965	13.9854	13.6837	15.5618	14.1722	15.4059
	P52597	HNRPF_HUMAN Heterogeneous nuclear ribonucleoprotein F OS=Homo sapiens OX=9606 GN=HNRNPF PE=1 SV=3	9	0.127745	0.626863	19.9586	19.4673	18.8506	19.3589	20.3217	18.9773	19.8925	18.5249
	Q9H7Z7	PGES2_HUMAN Prostaglandin E synthase 2 OS=Homo sapiens OX=9606 GN=PTGES2 PE=1 SV=1	4	0.127775	1.34049	16.5489	16.5441	16.1493	16.6605	16.0856	16.3337	15.4494	16.3858
	Q969Z0	FAKD4_HUMAN FAST kinase domain-containing protein 4 OS=Homo sapiens OX=9606 GN=TBRG4 PE=1 SV=1	5	0.127779	0.712763	16.3206	15.4423	16.7955	15.6733	16.4453	16.081	15.7414	16.1522
	Q96IJ6	GMPPA_HUMAN Mannose-1-phosphate guanyltransferase alpha OS=Homo sapiens OX=9606 GN=GMPPA PE=1 SV=1	3	0.127843	1.33508	17.1377	17.1473	16.266	17.212	16.5887	17.0527	16.3695	16.6177
	Q86V81	THOC4_HUMAN THO complex subunit 4 OS=Homo sapiens OX=9606 GN=ALYREF PE=1 SV=3	7	0.128138	0.838873	19.9717	19.8236	19.5275	19.3217	19.8668	19.5072	19.7398	19.4394
	Q9Y5P6	GMPPB_HUMAN Mannose-1-phosphate guanyltransferase beta OS=Homo sapiens OX=9606 GN=GMPPB PE=1 SV=2	7	0.128357	1.78579	16.4595	17.0555	17.6191	17.4221	15.4427	17.4666	16.8352	17.7586
	O15145	ARPC3_HUMAN Actin-related protein 2/3 complex subunit 3 OS=Homo sapiens OX=9606 GN=ARPC3 PE=1 SV=3	5	0.128435	1.54198	17.1002	18.3131	18.4972	18.5708	18.0356	18.7423	18.468	18.9739
	Q9UHY1	NRBP_HUMAN Nuclear receptor-binding protein OS=Homo sapiens OX=9606 GN=NRBP1 PE=1 SV=1	6	0.1291	0.746607	16.6575	16.4323	16.7931	16.158	16.0563	16.2657	17.1599	16.1244
	Q9P2J5	SYLC_HUMAN Leucine--tRNA ligase, cytoplasmic OS=Homo sapiens OX=9606 GN=LARS1 PE=1 SV=2	18	0.129101	1.85251	16.5627	18.0102	17.9892	18.0343	16.1119	18.0246	18.103	18.2556
	P84022	SMAD3_HUMAN Mothers against decapentaplegic homolog 3 OS=Homo sapiens OX=9606 GN=SMAD3 PE=1 SV=1;sp	8	0.12925	0.476174	15.2211	15.9465	17.3071	15.1786	17.4568	14.7486	15.8815	15.711
	P36507	MP2K2_HUMAN Dual specificity mitogen-activated protein kinase kinase 2 OS=Homo sapiens OX=9606 GN=MAP2K2 PE=1 SV=1	9	0.129505	1.22487	17.1648	17.5402	17.6698	17.83	17.2495	17.8688	17.7638	17.7794
	Q9H223	EHD4_HUMAN EH domain-containing protein 4 OS=Homo sapiens OX=9606 GN=EHD4 PE=1 SV=1	12	0.129598	1.24693	17.4465	17.9976	18.0623	17.8665	17.6168	17.8244	17.2259	17.9366
	Q9NZL4	HPBP1_HUMAN Hsp70-binding protein 1 OS=Homo sapiens OX=9606 GN=HSPBP1 PE=1 SV=2	3	0.129651	1.36451	15.9403	16.5284	16.0405	16.2225	16.408	16.2761	15.2304	16.3858
	Q6PGP7	TTC37_HUMAN Tetratricopeptide repeat protein 37 OS=Homo sapiens OX=9606 GN=TTC37 PE=1 SV=1	7	0.129687	0.796405	15.9619	15.312	15.3108	15.6144	16.1208	15.5285	15.7968	15.4217
	Q8NEM2	SHCBP_HUMAN SHC SH2 domain-binding protein 1 OS=Homo sapiens OX=9606 GN=SHCBP1 PE=1 SV=3	8	0.129749	0.41231	15.0134	14.1582	15.4323	15.1445	18.0537	14.8168	16.1952	15.4623
	Q9Y230	RUVB2_HUMAN RuvB-like 2 OS=Homo sapiens OX=9606 GN=RUVBL2 PE=1 SV=3	15	0.129781	1.20841	17.736	18.1244	18.2405	18.3424	18.3042	18.3273	17.8332	18.4122
	Q9NRV9	HEBP1_HUMAN Heme-binding protein 1 OS=Homo sapiens OX=9606 GN=HEBP1 PE=1 SV=1	2	0.129965	0.670493	16.6082	15.2133	15.2591	15.5772	16.0113	15.3857	15.5187	14.9144
	Q9Y287	ITM2B_HUMAN Integral membrane protein 2B OS=Homo sapiens OX=9606 GN=ITM2B PE=1 SV=1	2	0.130203	0.489235	16.2915	15.029	13.99	14.3329	16.3761	14.5591	15.4724	14.0835
	P36543	VATE1_HUMAN V-type proton ATPase subunit E 1 OS=Homo sapiens OX=9606 GN=ATP6V1E1 PE=1 SV=1	3	0.130667	0.688931	18.3439	18.0674	17.696	18.0429	18.596	17.723	18.3965	17.0488
	Q9BVG4	PBDC1_HUMAN Protein PBDC1 OS=Homo sapiens OX=9606 GN=PBDC1 PE=1 SV=1	6	0.13089	2.53007	16.7998	17.1863	16.5761	16.989	16.3743	17.2128	13.55	17.2687
	Q15029	U5S1_HUMAN 116 kDa U5 small nuclear ribonucleoprotein component OS=Homo sapiens OX=9606 GN=EFTUD2 PE=1 SV=1	24	0.131309	0.881736	18.7636	18.4537	18.9309	18.426	18.5092	18.623	18.648	18.6228
	Q13620	CUL4B_HUMAN Cullin-4B OS=Homo sapiens OX=9606 GN=CUL4B PE=1 SV=4	14	0.132143	0.488933	19.511	17.2005	16.7834	16.9567	17.7309	16.6754	18.3397	17.4032
	O14908	GIPC1_HUMAN PDZ domain-containing protein GIPC1 OS=Homo sapiens OX=9606 GN=GIPC1 PE=1 SV=2	8	0.13215	0.553272	21.3399	19.0725	21.7934	20.7685	21.0164	20.7024	20.7492	20.9397
	Q9Y4K1	CRBG1_HUMAN Beta/gamma crystallin domain-containing protein 1 OS=Homo sapiens OX=9606 GN=CRYBG1 PE=1 SV=3	8	0.13257	0.398945	16.5953	14.1446	14.9634	12.8918	15.2547	13.9585	13.1441	13.6595
	Q96N66	MBOA7_HUMAN Lysophospholipid acyltransferase 7 OS=Homo sapiens OX=9606 GN=MBOAT7 PE=1 SV=2	7	0.132688	0.758477	17.2233	16.6695	16.5255	16.5571	17.5954	16.7461	17.0395	16.8157
	Q02880	TOP2B_HUMAN DNA topoisomerase 2-beta OS=Homo sapiens OX=9606 GN=TOP2B PE=1 SV=3	10	0.13273	0.64661	16.7402	15.0756	16.798	16.7411	16.5921	16.3217	16.4776	15.9535
	Q9BSQ5	CCM2_HUMAN Cerebral cavernous malformations 2 protein OS=Homo sapiens OX=9606 GN=CCM2 PE=1 SV=1	3	0.132777	1.61213	14.8837	15.2835	14.7417	15.1496	13.239	14.9955	14.5133	14.7049
	O15511	ARPC5_HUMAN Actin-related protein 2/3 complex subunit 5 OS=Homo sapiens OX=9606 GN=ARPC5 PE=1 SV=3	4	0.132916	0.8177	18.6648	18.2784	18.7326	18.2403	18.7068	18.9217	18.7545	18.257
	P09110	THIK_HUMAN 3-ketoacyl-CoA thiolase, peroxisomal OS=Homo sapiens OX=9606 GN=ACAA1 PE=1 SV=2	7	0.133097	2.24051	14.7932	15.9102	17.1681	17.0298	16.1193	17.2513	14.6976	17.2422
	Q9P2B4	CT2NL_HUMAN CTTNBP2 N-terminal-like protein OS=Homo sapiens OX=9606 GN=CTTNBP2NL PE=1 SV=2	3	0.133192	0.564817	16.0382	13.7375	14.3261	14.5179	15.2608	14.4148	14.1942	13.8527
	A0MZ66	SHOT1_HUMAN Shootin-1 OS=Homo sapiens OX=9606 GN=SHTN1 PE=1 SV=4	9	0.133195	0.577417	17.4146	16.281	15.835	15.2721	16.7599	15.6269	15.747	15.4073
	Q05193	DYN1_HUMAN Dynamin-1 OS=Homo sapiens OX=9606 GN=DNM1 PE=1 SV=2	2	0.133382	1.30155	16.1951	16.5939	15.7064	16.5876	15.7149	15.9414	15.9347	15.9491
	Q14376	GALE_HUMAN UDP-glucose 4-epimerase OS=Homo sapiens OX=9606 GN=GALE PE=1 SV=2	6	0.13358	1.14474	17.5809	17.4713	17.2303	17.4729	17.0461	17.5167	17.2564	17.4329
	P98179	RBM3_HUMAN RNA-binding protein 3 OS=Homo sapiens OX=9606 GN=RBM3 PE=1 SV=1	3	0.133609	0.530248	19.1445	17.7573	17.8145	17.392	18.3217	16.4981	16.9876	16.9598
	O00442	RTCA_HUMAN RNA 3-terminal phosphate cyclase OS=Homo sapiens OX=9606 GN=RTCA PE=1 SV=1	4	0.133902	1.18941	16.0705	16.3279	15.8197	16.181	16.2834	16.4407	16.3433	16.5684
	Q6IBS0	TWF2_HUMAN Twinfilin-2 OS=Homo sapiens OX=9606 GN=TWF2 PE=1 SV=2	11	0.133988	0.853339	18.5974	18.1792	18.1846	18.1407	18.3509	17.9811	18.0399	17.9566
	P42858	HD_HUMAN Huntingtin OS=Homo sapiens OX=9606 GN=HTT PE=1 SV=2	6	0.133995	2.04157	13.1558	14.8083	15.6346	15.0215	14.2002	15.056	13.2101	15.4337
	Q14789	GOGB1_HUMAN Golgin subfamily B member 1 OS=Homo sapiens OX=9606 GN=GOLGB1 PE=1 SV=2	18	0.134025	0.475125	16.9613	13.4091	15.9471	15.2374	15.3009	15.1503	14.9729	15.0909
	Q06323	PSME1_HUMAN Proteasome activator complex subunit 1 OS=Homo sapiens OX=9606 GN=PSME1 PE=1 SV=1	11	0.134067	1.52711	16.7171	18.324	17.8729	18.1706	17.5059	18.1432	18.3805	18.2819
	P62937	PPIA_HUMAN Peptidyl-prolyl cis-trans isomerase A OS=Homo sapiens OX=9606 GN=PPIA PE=1 SV=2	10	0.13425	0.81157	20.1012	20.0055	19.8437	19.9312	19.9151	19.6317	20.3729	19.4597
	P46736	BRCC3_HUMAN Lys-63-specific deubiquitinase BRCC36 OS=Homo sapiens OX=9606 GN=BRCC3 PE=1 SV=2	4	0.13459	0.66845	15.1083	14.3658	16.0503	14.8458	14.8456	15.1113	15.7966	15.1536
	Q05682	CALD1_HUMAN Caldesmon OS=Homo sapiens OX=9606 GN=CALD1 PE=1 SV=3	26	0.134704	1.37919	18.2791	19.2805	19.1169	19.6083	19.3589	19.5851	19.3731	19.5094
	P55072	TERA_HUMAN Transitional endoplasmic reticulum ATPase OS=Homo sapiens OX=9606 GN=VCP PE=1 SV=4	37	0.135447	1.05857	20.6906	20.8101	20.6646	20.7498	20.6578	20.8471	20.839	20.7735
	Q8NEJ9	NGDN_HUMAN Neuroguidin OS=Homo sapiens OX=9606 GN=NGDN PE=1 SV=1	2	0.135561	1.65731	15.0308	15.195	15.5075	15.4195	13.5846	15.6107	14.8326	15.6456
	Q8IX01	SUGP2_HUMAN SURP and G-patch domain-containing protein 2 OS=Homo sapiens OX=9606 GN=SUGP2 PE=1 SV=2	6	0.135722	0.439757	17.4812	15.9507	15.1528	14.3894	17.495	15.4631	15.6976	15.2827
	Q8TCS8	PNPT1_HUMAN Polyribonucleotide nucleotidyltransferase 1, mitochondrial OS=Homo sapiens OX=9606 GN=PNPT1 PE=1 SV=2	6	0.135786	2.77608	16.7867	16.5249	16.3928	16.6099	14.3799	16.7749	13.1678	16.7097
	Q13557	KCC2D_HUMAN Calcium/calmodulin-dependent protein kinase type II subunit delta OS=Homo sapiens OX=9606 GN=CAMK2D PE=1 SV=3	6	0.136173	0.805976	18.8448	18.1335	18.0742	18.107	18.5311	18.3749	18.717	18.3069
	Q8IUI8	CRLF3_HUMAN Cytokine receptor-like factor 3 OS=Homo sapiens OX=9606 GN=CRLF3 PE=1 SV=2	2	0.136239	2.37303	14.3694	17.3669	17.3604	17.4246	15.8099	17.5996	17.3947	17.5302
	P49591	SYSC_HUMAN Serine--tRNA ligase, cytoplasmic OS=Homo sapiens OX=9606 GN=SARS1 PE=1 SV=3	12	0.136871	0.91734	17.9872	18.0007	18.1165	18.055	18.2782	18.1027	18.2115	17.9371
	Q6IA86	ELP2_HUMAN Elongator complex protein 2 OS=Homo sapiens OX=9606 GN=ELP2 PE=1 SV=2	3	0.136911	0.69142	15.7924	14.392	15.8176	14.9874	15.0559	15.0396	14.7224	14.84
	Q13045	FLII_HUMAN Protein flightless-1 homolog OS=Homo sapiens OX=9606 GN=FLII PE=1 SV=2	14	0.136972	1.1784	17.2626	17.6473	17.6872	17.357	17.1757	17.6681	17.2817	17.6822
	P07954	FUMH_HUMAN Fumarate hydratase, mitochondrial OS=Homo sapiens OX=9606 GN=FH PE=1 SV=3	11	0.137019	0.844713	19.3151	19.0451	19.0723	19.0809	19.383	19.06	19.0142	18.6247
	Q15691	MARE1_HUMAN Microtubule-associated protein RP/EB family member 1 OS=Homo sapiens OX=9606 GN=MAPRE1 PE=1 SV=3	9	0.137037	1.35045	18.0826	18.4476	18.9513	18.8913	18.4081	18.8957	17.9167	18.8579
	Q8TCG1	CIP2A_HUMAN Protein CIP2A OS=Homo sapiens OX=9606 GN=CIP2A PE=1 SV=2	4	0.137298	0.611215	15.1779	14.0456	15.253	13.8265	13.5649	14.3262	14.7215	13.678
	P33991	MCM4_HUMAN DNA replication licensing factor MCM4 OS=Homo sapiens OX=9606 GN=MCM4 PE=1 SV=5	15	0.137579	0.84395	18.1638	17.495	17.9004	17.5276	17.7184	17.6473	17.5194	17.653
	Q9UHB9	SRP68_HUMAN Signal recognition particle subunit SRP68 OS=Homo sapiens OX=9606 GN=SRP68 PE=1 SV=2	9	0.137615	1.43305	17.0323	17.5347	17.8387	17.9614	16.714	17.9444	17.8055	18.0263
	Q9UN86	G3BP2_HUMAN Ras GTPase-activating protein-binding protein 2 OS=Homo sapiens OX=9606 GN=G3BP2 PE=1 SV=2	6	0.13797	0.81536	19.3301	18.5899	18.5516	18.6892	18.7981	18.665	18.8791	18.4368
	Q460N5	PAR14_HUMAN Protein mono-ADP-ribosyltransferase PARP14 OS=Homo sapiens OX=9606 GN=PARP14 PE=1 SV=3	5	0.13811	0.669871	15.7251	15.373	16.4743	15.205	14.9758	15.4356	16.1369	14.9862
	Q8NFH3	NUP43_HUMAN Nucleoporin Nup43 OS=Homo sapiens OX=9606 GN=NUP43 PE=1 SV=1	4	0.13829	0.634106	16.5707	16.5973	15.65	15.6204	16.8401	15.4343	16.7794	15.5594
	Q8NFH5	NUP35_HUMAN Nucleoporin NUP35 OS=Homo sapiens OX=9606 GN=NUP35 PE=1 SV=1	4	0.138419	2.03634	15.4832	15.7651	16.3913	15.9284	14.7678	16.4095	13.6384	16.2818
	Q9Y3A3	PHOCN_HUMAN MOB-like protein phocein OS=Homo sapiens OX=9606 GN=MOB4 PE=1 SV=1	3	0.138461	0.494719	15.2777	14.4092	16.0573	15.1478	16.0795	15.3732	14.7409	13.1639
	Q13362	2A5G_HUMAN Serine/threonine-protein phosphatase 2A 56 kDa regulatory subunit gamma isoform OS=Homo sapiens OX=9606 GN=PPP2R5C PE=1 SV=3	1	0.139127	0.609445	15.5098	14.3428	15.0995	14.1054	14.2543	14.0663	13.9174	13.4087
	P46060	RAGP1_HUMAN Ran GTPase-activating protein 1 OS=Homo sapiens OX=9606 GN=RANGAP1 PE=1 SV=1	12	0.139143	1.31745	18.0796	18.3832	18.6955	18.6573	17.7599	18.562	18.4125	18.936
	Q16666	IF16_HUMAN Gamma-interferon-inducible protein 16 OS=Homo sapiens OX=9606 GN=IFI16 PE=1 SV=3	11	0.139949	1.36485	17.731	17.6204	16.9143	17.361	17.0044	17.5228	16.4895	17.4299
	P62318	SMD3_HUMAN Small nuclear ribonucleoprotein Sm D3 OS=Homo sapiens OX=9606 GN=SNRPD3 PE=1 SV=1	4	0.14013	0.431266	15.8189	14.7697	14.7966	13.8071	16.9504	13.8059	15.8558	16.1856
	Q07960	RHG01_HUMAN Rho GTPase-activating protein 1 OS=Homo sapiens OX=9606 GN=ARHGAP1 PE=1 SV=1	11	0.140282	1.32213	17.7889	18.1032	18.1535	18.0646	17.0256	18.0304	17.5914	17.9728
	Q9BZZ5	API5_HUMAN Apoptosis inhibitor 5 OS=Homo sapiens OX=9606 GN=API5 PE=1 SV=3	4	0.14035	0.774935	18.8373	17.9189	18.0949	18.3747	18.705	18.1457	18.1779	17.9044
	Q99733	NP1L4_HUMAN Nucleosome assembly protein 1-like 4 OS=Homo sapiens OX=9606 GN=NAP1L4 PE=1 SV=1	9	0.140445	1.14671	18.876	19.1917	19.0659	19.0127	19.1708	19.1709	18.6861	19.2135
	Q9UDT6	CLIP2_HUMAN CAP-Gly domain-containing linker protein 2 OS=Homo sapiens OX=9606 GN=CLIP2 PE=1 SV=1	7	0.140768	0.571262	17.7296	16.2414	16.9925	15.5135	15.8401	15.5576	16.0212	16.0397
	Q99497	PARK7_HUMAN Parkinson disease protein 7 OS=Homo sapiens OX=9606 GN=PARK7 PE=1 SV=2	8	0.141501	1.29438	18.9945	19.6432	19.713	20.1463	19.6297	19.953	19.8795	19.9631
	Q05639	EF1A2_HUMAN Elongation factor 1-alpha 2 OS=Homo sapiens OX=9606 GN=EEF1A2 PE=1 SV=1	6	0.14154	1.39153	17.1112	17.4652	17.5402	17.7157	16.3393	17.6933	17.4537	17.4767
	Q9H2G2	SLK_HUMAN STE20-like serine/threonine-protein kinase OS=Homo sapiens OX=9606 GN=SLK PE=1 SV=1	11	0.141704	1.2389	15.7587	16.2159	16.2995	16.1218	16.1941	16.7295	15.9131	16.3344
	P10515	ODP2_HUMAN Dihydrolipoyllysine-residue acetyltransferase component of pyruvate dehydrogenase complex, mitochondrial OS=Homo sapiens OX=9606 GN=DLAT PE=1 SV=3	7	0.14233	1.56438	17.3689	18.6954	18.7243	18.8626	18.5531	18.777	17.4123	18.3059
	O14936	CSKP_HUMAN Peripheral plasma membrane protein CASK OS=Homo sapiens OX=9606 GN=CASK PE=1 SV=3	7	0.142387	0.509856	16.2445	14.3936	15.0401	13.9083	16.5564	15.0042	14.3884	15.0359
	Q8IWX8	CHERP_HUMAN Calcium homeostasis endoplasmic reticulum protein OS=Homo sapiens OX=9606 GN=CHERP PE=1 SV=3	5	0.14269	1.10088	15.9177	16.2636	16.1247	16.1586	16.1949	16.2194	15.921	16.0712
	P35580	MYH10_HUMAN Myosin-10 OS=Homo sapiens OX=9606 GN=MYH10 PE=1 SV=3	41	0.143012	0.847354	18.5222	17.9285	17.9794	17.8207	18.0212	17.8489	17.9095	17.8783
	P16435	NCPR_HUMAN NADPH--cytochrome P450 reductase OS=Homo sapiens OX=9606 GN=POR PE=1 SV=2	5	0.143024	1.9988	15.8279	17.2808	14.401	17.1095	16.9885	16.8554	16.628	16.5962
	P63261	ACTG_HUMAN Actin, cytoplasmic 2 OS=Homo sapiens OX=9606 GN=ACTG1 PE=1 SV=1	1	0.143045	1.4689	21.0877	22.4178	22.526	22.4794	21.8499	22.4959	22.3769	22.6664
	Q9NVT9	ARMC1_HUMAN Armadillo repeat-containing protein 1 OS=Homo sapiens OX=9606 GN=ARMC1 PE=1 SV=1	2	0.143158	0.532602	15.0588	15.1541	15.5955	15.4497	15.65	14.5292	15.567	13.1029
	Q96SK2	TM209_HUMAN Transmembrane protein 209 OS=Homo sapiens OX=9606 GN=TMEM209 PE=1 SV=2	1	0.14331	0.684479	15.9949	14.2083	15.063	15.2053	15.6616	15.1222	15.1209	15.117
	P26599	PTBP1_HUMAN Polypyrimidine tract-binding protein 1 OS=Homo sapiens OX=9606 GN=PTBP1 PE=1 SV=1	15	0.143359	0.879839	19.8643	19.9474	19.8212	19.6336	19.984	19.7363	20.2105	19.824
	P47895	AL1A3_HUMAN Aldehyde dehydrogenase family 1 member A3 OS=Homo sapiens OX=9606 GN=ALDH1A3 PE=1 SV=2	9	0.143471	0.881618	18.2327	18.2057	18.3525	18.0101	18.1589	18.2051	18.6005	18.1966
	Q9P0Z9	SOX_HUMAN Peroxisomal sarcosine oxidase OS=Homo sapiens OX=9606 GN=PIPOX PE=1 SV=2	9	0.143986	1.18356	17.0303	17.4744	17.0879	17.6626	17.1255	17.3934	17.4205	17.1064
	Q14CX7	NAA25_HUMAN N-alpha-acetyltransferase 25, NatB auxiliary subunit OS=Homo sapiens OX=9606 GN=NAA25 PE=1 SV=1	6	0.144261	1.30573	15.2659	14.8668	14.9202	15.1492	14.3581	15.2512	14.4894	15.3058
	Q9NPA0	EMC7_HUMAN ER membrane protein complex subunit 7 OS=Homo sapiens OX=9606 GN=EMC7 PE=1 SV=1	2	0.144352	0.32007	16.6335	13.6335	16.9236	16.701	16.865	13.1512	16.4253	16.7875
	Q14690	RRP5_HUMAN Protein RRP5 homolog OS=Homo sapiens OX=9606 GN=PDCD11 PE=1 SV=3	5	0.144409	1.45632	14.9839	15.4722	14.7453	15.0703	13.7261	14.8527	14.95	15.1794
	P63173	RL38_HUMAN 60S ribosomal protein L38 OS=Homo sapiens OX=9606 GN=RPL38 PE=1 SV=2	4	0.144506	1.3514	18.8331	18.9494	18.5241	19.3868	17.9999	18.714	18.434	18.4788
	P23368	MAOM_HUMAN NAD-dependent malic enzyme, mitochondrial OS=Homo sapiens OX=9606 GN=ME2 PE=1 SV=1	6	0.14461	1.1414	16.7996	17.0876	16.4672	16.8007	16.6643	16.7253	16.6066	16.6872
	Q96C90	PP14B_HUMAN Protein phosphatase 1 regulatory subunit 14B OS=Homo sapiens OX=9606 GN=PPP1R14B PE=1 SV=3	3	0.144888	0.634375	17.4452	17.0381	16.726	16.5676	18.4866	16.8689	17.1137	16.6705
	P38117	ETFB_HUMAN Electron transfer flavoprotein subunit beta OS=Homo sapiens OX=9606 GN=ETFB PE=1 SV=3	4	0.14494	0.778058	18.0701	17.9247	17.4465	17.4685	18.1477	17.3656	17.7985	17.2558
	Q9NP97	DLRB1_HUMAN Dynein light chain roadblock-type 1 OS=Homo sapiens OX=9606 GN=DYNLRB1 PE=1 SV=3;sp	3	0.14502	1.88678	15.6827	17.2687	16.8392	16.917	17.0045	16.9136	14.7094	16.8003
	Q13573	SNW1_HUMAN SNW domain-containing protein 1 OS=Homo sapiens OX=9606 GN=SNW1 PE=1 SV=1	10	0.14708	0.531403	17.2749	16.2417	16.0415	16.044	16.9126	15.5558	15.6924	14.4316
	Q14240	IF4A2_HUMAN Eukaryotic initiation factor 4A-II OS=Homo sapiens OX=9606 GN=EIF4A2 PE=1 SV=2	6	0.148501	0.862074	17.4146	17.5283	17.813	17.6186	17.969	17.6134	17.9169	17.4968
	Q9BXB5	OSB10_HUMAN Oxysterol-binding protein-related protein 10 OS=Homo sapiens OX=9606 GN=OSBPL10 PE=1 SV=2	5	0.149154	0.126065	21.1847	14.3798	13.7319	14.2757	18.7765	14.225	18.9627	17.8242
	Q14103	HNRPD_HUMAN Heterogeneous nuclear ribonucleoprotein D0 OS=Homo sapiens OX=9606 GN=HNRNPD PE=1 SV=1	8	0.149156	1.34331	18.2562	19.1236	19.0265	19.2108	18.18	18.9412	19.136	19.0263
	Q68EM7	RHG17_HUMAN Rho GTPase-activating protein 17 OS=Homo sapiens OX=9606 GN=ARHGAP17 PE=1 SV=1	2	0.149478	2.17907	16.3952	16.3246	14.4573	15.4909	14.2003	15.9612	13.4202	15.1911
	Q9ULA0	DNPEP_HUMAN Aspartyl aminopeptidase OS=Homo sapiens OX=9606 GN=DNPEP PE=1 SV=1	7	0.149841	1.84001	16.1817	16.1245	16.2435	16.1053	14.9193	16.3768	14.0551	16.3118
	Q86XP3	DDX42_HUMAN ATP-dependent RNA helicase DDX42 OS=Homo sapiens OX=9606 GN=DDX42 PE=1 SV=1	13	0.150334	0.826477	17.076	16.3885	17.1409	16.744	16.4879	16.6388	16.8122	16.6458
	Q8NDH3	PEPL1_HUMAN Probable aminopeptidase NPEPL1 OS=Homo sapiens OX=9606 GN=NPEPL1 PE=1 SV=3	4	0.151274	0.794029	16.5895	16.0202	16.0761	15.96	16.2171	15.7869	15.7597	15.5443
	Q1KMD3	HNRL2_HUMAN Heterogeneous nuclear ribonucleoprotein U-like protein 2 OS=Homo sapiens OX=9606 GN=HNRNPUL2 PE=1 SV=1	14	0.151435	0.675822	19.019	17.9902	17.4297	17.7677	18.5891	17.6745	18.4895	17.8337
	P19174	PLCG1_HUMAN 1-phosphatidylinositol 4,5-bisphosphate phosphodiesterase gamma-1 OS=Homo sapiens OX=9606 GN=PLCG1 PE=1 SV=1	10	0.151771	1.33876	15.6336	16.8187	16.6737	16.8811	16.2555	16.7001	16.6229	16.4694
	Q13177	PAK2_HUMAN Serine/threonine-protein kinase PAK 2 OS=Homo sapiens OX=9606 GN=PAK2 PE=1 SV=3	10	0.151921	1.14365	18.6645	18.8147	18.8522	18.778	18.4364	18.7602	18.3353	18.7101
	P17252	KPCA_HUMAN Protein kinase C alpha type OS=Homo sapiens OX=9606 GN=PRKCA PE=1 SV=4	7	0.151972	1.63507	15.376	16.1062	15.8039	16.4607	16.9061	16.9663	15.1172	16.5074
	O60568	PLOD3_HUMAN Multifunctional procollagen lysine hydroxylase and glycosyltransferase LH3 OS=Homo sapiens OX=9606 GN=PLOD3 PE=1 SV=1	12	0.152934	0.826256	17.9464	17.8456	18.3691	17.733	17.7021	17.9168	18.3576	17.7785
	Q13131	AAPK1_HUMAN 5-AMP-activated protein kinase catalytic subunit alpha-1 OS=Homo sapiens OX=9606 GN=PRKAA1 PE=1 SV=4	6	0.152972	1.18995	15.6421	15.7218	15.648	15.8251	15.9162	15.9252	15.2202	15.9581
	Q99755	PI51A_HUMAN Phosphatidylinositol 4-phosphate 5-kinase type-1 alpha OS=Homo sapiens OX=9606 GN=PIP5K1A PE=1 SV=1	1	0.153134	1.34248	14.2253	14.8104	13.796	14.9866	14.4223	14.6875	14.994	14.6527
	P62314	SMD1_HUMAN Small nuclear ribonucleoprotein Sm D1 OS=Homo sapiens OX=9606 GN=SNRPD1 PE=1 SV=1	4	0.153578	0.792631	20.3236	19.546	19.8112	19.4719	19.4609	19.7281	19.7408	19.2494
	Q9UBT2	SAE2_HUMAN SUMO-activating enzyme subunit 2 OS=Homo sapiens OX=9606 GN=UBA2 PE=1 SV=2	11	0.153647	0.606514	19.3147	17.6047	17.3994	17.3375	17.7979	17.2663	17.692	17.1099
	Q9UMX5	NENF_HUMAN Neudesin OS=Homo sapiens OX=9606 GN=NENF PE=1 SV=1	4	0.153732	0.802721	17.8172	17.612	17.4841	17.3002	17.6811	17.3117	17.3351	16.8255
	Q13526	PIN1_HUMAN Peptidyl-prolyl cis-trans isomerase NIMA-interacting 1 OS=Homo sapiens OX=9606 GN=PIN1 PE=1 SV=1	5	0.153951	0.842035	18.01	17.9191	17.6011	17.695	18.193	17.712	18.0105	17.4964
	P50991	TCPD_HUMAN T-complex protein 1 subunit delta OS=Homo sapiens OX=9606 GN=CCT4 PE=1 SV=4	17	0.154056	1.13056	19.5507	20.1707	19.9257	19.9651	19.8698	19.9512	19.9262	19.8936
	O15160	RPAC1_HUMAN DNA-directed RNA polymerases I and III subunit RPAC1 OS=Homo sapiens OX=9606 GN=POLR1C PE=1 SV=1	5	0.154093	1.62898	15.7027	15.5812	14.6432	16.2777	15.7336	15.6282	14.1455	15.5538
	Q969H8	MYDGF_HUMAN Myeloid-derived growth factor OS=Homo sapiens OX=9606 GN=MYDGF PE=1 SV=1	4	0.154425	1.52396	18.3594	18.6941	19.2599	19.2147	17.7356	19.6073	18.6605	18.9306
	Q96JH7	VCIP1_HUMAN Deubiquitinating protein VCIP135 OS=Homo sapiens OX=9606 GN=VCPIP1 PE=1 SV=2	7	0.154671	1.42912	15.3898	15.8208	16.4736	16.1973	15.6865	16.7437	15.4128	16.2614
	Q08378	GOGA3_HUMAN Golgin subfamily A member 3 OS=Homo sapiens OX=9606 GN=GOLGA3 PE=1 SV=2	7	0.154721	0.513647	16.5183	13.4285	15.3525	14.2756	15.0316	14.9037	14.0952	14.5452
	P55209	NP1L1_HUMAN Nucleosome assembly protein 1-like 1 OS=Homo sapiens OX=9606 GN=NAP1L1 PE=1 SV=1	10	0.15493	1.45973	20.221	21.0776	20.8703	20.7754	19.6065	20.9444	21.033	21.1162
	Q9UNM6	PSD13_HUMAN 26S proteasome non-ATPase regulatory subunit 13 OS=Homo sapiens OX=9606 GN=PSMD13 PE=1 SV=2	16	0.15503	1.17409	18.5942	19.2911	19.0457	19.1403	18.8849	19.0896	19.2357	19.1656
	Q8NDI1	EHBP1_HUMAN EH domain-binding protein 1 OS=Homo sapiens OX=9606 GN=EHBP1 PE=1 SV=3	5	0.155119	0.426424	18.1084	15.1041	14.5241	15.0041	16.154	14.687	15.6384	14.711
	Q05086	UBE3A_HUMAN Ubiquitin-protein ligase E3A OS=Homo sapiens OX=9606 GN=UBE3A PE=1 SV=4	6	0.155193	0.466271	16.1496	13.7938	14.145	15.1579	16.3739	15.5191	16.4134	14.2081
	Q70E73	RAPH1_HUMAN Ras-associated and pleckstrin homology domains-containing protein 1 OS=Homo sapiens OX=9606 GN=RAPH1 PE=1 SV=3	5	0.155945	1.44446	13.9436	15.3206	14.5774	14.8814	14.737	15.1886	15.4306	15.4202
	P42345	MTOR_HUMAN Serine/threonine-protein kinase mTOR OS=Homo sapiens OX=9606 GN=MTOR PE=1 SV=1	11	0.156046	0.661692	16.3073	15.7424	15.1166	15.4284	16.0758	15.0895	15.6759	14.5323
	Q5JTV8	TOIP1_HUMAN Torsin-1A-interacting protein 1 OS=Homo sapiens OX=9606 GN=TOR1AIP1 PE=1 SV=2	8	0.156119	1.76996	16.3405	16.8933	16.0439	16.685	17.4563	17.4937	15.1485	17.2121
	Q13630	FCL_HUMAN GDP-L-fucose synthase OS=Homo sapiens OX=9606 GN=TSTA3 PE=1 SV=1	3	0.156159	0.564091	16.9743	15.1284	15.8313	15.6909	17.2256	15.6528	15.1258	15.381
	Q86X55	CARM1_HUMAN Histone-arginine methyltransferase CARM1 OS=Homo sapiens OX=9606 GN=CARM1 PE=1 SV=3	2	0.15634	1.24073	16.8343	17.5517	17.004	16.9899	16.5307	16.9932	16.7098	16.7888
	Q9UN37	VPS4A_HUMAN Vacuolar protein sorting-associated protein 4A OS=Homo sapiens OX=9606 GN=VPS4A PE=1 SV=1	5	0.156368	0.774633	16.7502	16.9887	16.7631	16.5248	16.8118	16.2315	16.8163	15.9227
	Q15334	L2GL1_HUMAN Lethal(2) giant larvae protein homolog 1 OS=Homo sapiens OX=9606 GN=LLGL1 PE=1 SV=3	6	0.15645	0.679015	16.4025	15.7082	15.3595	15.5468	16.7606	15.2266	15.6059	15.4131
	Q8WUM0	NU133_HUMAN Nuclear pore complex protein Nup133 OS=Homo sapiens OX=9606 GN=NUP133 PE=1 SV=2	12	0.156594	1.2293	16.0804	16.811	16.7972	16.469	16.2449	16.8562	16.5833	16.7608
	Q9NTZ6	RBM12_HUMAN RNA-binding protein 12 OS=Homo sapiens OX=9606 GN=RBM12 PE=1 SV=1	5	0.156744	0.380155	18.088	16.9135	16.2559	13.8825	18.3254	16.4675	16.6666	16.4912
	P55010	IF5_HUMAN Eukaryotic translation initiation factor 5 OS=Homo sapiens OX=9606 GN=EIF5 PE=1 SV=2	11	0.156948	0.903528	17.8978	17.4936	17.7577	17.7795	17.9015	17.7845	17.9462	17.8601
	P30085	KCY_HUMAN UMP-CMP kinase OS=Homo sapiens OX=9606 GN=CMPK1 PE=1 SV=3	8	0.157331	0.895219	18.5089	18.1978	18.2928	18.1357	18.4306	18.2195	18.0726	18.1131
	Q9UFN0	NPS3A_HUMAN Protein NipSnap homolog 3A OS=Homo sapiens OX=9606 GN=NIPSNAP3A PE=1 SV=2	3	0.157536	2.96196	15.3904	17.3382	12.9857	16.9325	16.3775	16.909	17.5079	17.3479
	P22314	UBA1_HUMAN Ubiquitin-like modifier-activating enzyme 1 OS=Homo sapiens OX=9606 GN=UBA1 PE=1 SV=3	32	0.157658	1.19648	19.919	20.425	20.4712	20.4529	20.0227	20.5118	20.5365	20.5948
	O00625	PIR_HUMAN Pirin OS=Homo sapiens OX=9606 GN=PIR PE=1 SV=1	2	0.157998	0.565469	15.504	14.5048	16.0109	14.0133	13.8355	14.2255	14.5097	13.8266
	Q92616	GCN1_HUMAN eIF-2-alpha kinase activator GCN1 OS=Homo sapiens OX=9606 GN=GCN1 PE=1 SV=6	30	0.158585	1.28421	16.781	16.99	17.3552	17.1781	16.5383	17.0553	16.3663	17.261
	Q10471	GALT2_HUMAN Polypeptide N-acetylgalactosaminyltransferase 2 OS=Homo sapiens OX=9606 GN=GALNT2 PE=1 SV=1	7	0.158855	0.642659	17.3257	17.1065	16.2622	16.2636	17.3822	15.6556	16.8311	16.224
	P10768	ESTD_HUMAN S-formylglutathione hydrolase OS=Homo sapiens OX=9606 GN=ESD PE=1 SV=2	8	0.158933	1.35262	17.9231	18.5059	17.2288	18.5875	17.9776	17.9811	17.9619	17.7601
	Q9Y316	MEMO1_HUMAN Protein MEMO1 OS=Homo sapiens OX=9606 GN=MEMO1 PE=1 SV=1	4	0.158988	0.55946	15.7673	15.096	15.2995	14.6895	15.6905	14.4514	14.1859	13.3548
	Q8IXB1	DJC10_HUMAN DnaJ homolog subfamily C member 10 OS=Homo sapiens OX=9606 GN=DNAJC10 PE=1 SV=2	5	0.159257	2.12464	14.0785	15.9679	16.107	16.0897	13.7183	15.8979	14.0832	14.3804
	Q8NI22	MCFD2_HUMAN Multiple coagulation factor deficiency protein 2 OS=Homo sapiens OX=9606 GN=MCFD2 PE=1 SV=1	2	0.15935	0.566013	18.7546	17.2855	16.5769	17.0172	18.4354	16.7322	17.4079	16.8555
	P01889	HLAB_HUMAN HLA class I histocompatibility antigen, B alpha chain OS=Homo sapiens OX=9606 GN=HLA-B PE=1 SV=3	2	0.159398	0.615281	20.0072	18.7208	18.671	19.153	20.2905	18.6271	18.8115	18.4766
	Q14573	ITPR3_HUMAN Inositol 1,4,5-trisphosphate receptor type 3 OS=Homo sapiens OX=9606 GN=ITPR3 PE=1 SV=2	8	0.15969	0.615503	15.5396	13.8168	15.1702	14.9805	16.1961	14.9279	14.6532	15.0332
	P41214	EIF2D_HUMAN Eukaryotic translation initiation factor 2D OS=Homo sapiens OX=9606 GN=EIF2D PE=1 SV=3	2	0.160006	0.643656	14.8116	13.1551	13.7312	14.0247	14.1372	13.4885	13.3829	12.8521
	Q02750	MP2K1_HUMAN Dual specificity mitogen-activated protein kinase kinase 1 OS=Homo sapiens OX=9606 GN=MAP2K1 PE=1 SV=2	6	0.160096	0.742188	18.7025	18.0457	17.9269	18.1385	18.7694	17.9487	17.9616	17.5069
	Q9NUQ9	CYRIB_HUMAN CYFIP-related Rac1 interactor B OS=Homo sapiens OX=9606 GN=CYRIB PE=1 SV=1	9	0.160659	1.13943	19.037	19.3216	19.1493	19.0771	18.8455	19.0637	18.7132	19.0359
	P07738	PMGE_HUMAN Bisphosphoglycerate mutase OS=Homo sapiens OX=9606 GN=BPGM PE=1 SV=2	3	0.161085	1.5154	14.6891	16.4084	16.3738	16.3938	15.9853	16.4169	16.095	16.3229
	Q66K74	MAP1S_HUMAN Microtubule-associated protein 1S OS=Homo sapiens OX=9606 GN=MAP1S PE=1 SV=2	6	0.161467	2.1934	14.0952	13.8814	15.5824	15.591	13.5748	15.4155	13.3836	16.2807
	Q15043	S39AE_HUMAN Metal cation symporter ZIP14 OS=Homo sapiens OX=9606 GN=SLC39A14 PE=1 SV=3	3	0.16148	0.680309	14.9273	15.5229	16.0753	14.9873	16.4842	15.344	15.8197	15.2295
	Q9UBQ5	EIF3K_HUMAN Eukaryotic translation initiation factor 3 subunit K OS=Homo sapiens OX=9606 GN=EIF3K PE=1 SV=1	5	0.161882	1.34766	17.5119	18.564	17.4827	18.3607	17.9894	18.2946	18.5201	18.0066
	P04181	OAT_HUMAN Ornithine aminotransferase, mitochondrial OS=Homo sapiens OX=9606 GN=OAT PE=1 SV=1	9	0.162103	0.732188	16.7055	17.0798	17.105	16.7904	17.9636	16.8705	17.5775	16.812
	Q96PU8	QKI_HUMAN Protein quaking OS=Homo sapiens OX=9606 GN=QKI PE=1 SV=1	2	0.162226	0.387535	14.6082	14.2445	17.1467	13.4319	16.4016	16.5543	15.8357	14.2911
	Q15005	SPCS2_HUMAN Signal peptidase complex subunit 2 OS=Homo sapiens OX=9606 GN=SPCS2 PE=1 SV=3	5	0.162318	2.86211	17.4425	17.7122	14.5838	17.5615	18.0415	17.4777	14.3784	17.7631
	Q92974	ARHG2_HUMAN Rho guanine nucleotide exchange factor 2 OS=Homo sapiens OX=9606 GN=ARHGEF2 PE=1 SV=4	12	0.162478	2.05166	16.1954	16.8566	16.7373	16.8306	16.3893	16.9152	13.8785	16.7453
	Q9Y6B6	SAR1B_HUMAN GTP-binding protein SAR1b OS=Homo sapiens OX=9606 GN=SAR1B PE=1 SV=1	2	0.163213	4.27303	17.3151	13.8778	14.0462	18.1754	14.2836	17.9507	14.1099	18.132
	P78527	PRKDC_HUMAN DNA-dependent protein kinase catalytic subunit OS=Homo sapiens OX=9606 GN=PRKDC PE=1 SV=3	82	0.163388	1.09205	18.891	19.1112	19.26	19.2081	19.036	19.2155	19.0503	19.2106
	Q5UIP0	RIF1_HUMAN Telomere-associated protein RIF1 OS=Homo sapiens OX=9606 GN=RIF1 PE=1 SV=2	8	0.163575	0.647582	15.6271	13.5189	14.6582	14.2886	14.8505	14.2915	14.078	14.6074
	Q13564	ULA1_HUMAN NEDD8-activating enzyme E1 regulatory subunit OS=Homo sapiens OX=9606 GN=NAE1 PE=1 SV=1	11	0.163577	0.666771	17.7567	16.0806	17.7124	17.5457	17.7808	17.4862	17.8142	17.6126
	P30044	PRDX5_HUMAN Peroxiredoxin-5, mitochondrial OS=Homo sapiens OX=9606 GN=PRDX5 PE=1 SV=4	6	0.163703	3.73374	15.1266	17.764	18.6075	18.4586	13.6752	18.4958	18.1152	18.4085
	O60763	USO1_HUMAN General vesicular transport factor p115 OS=Homo sapiens OX=9606 GN=USO1 PE=1 SV=2	22	0.164951	1.11309	18.7754	18.7981	18.6765	18.9726	19.0102	18.9111	18.677	19.0757
	O14617	AP3D1_HUMAN AP-3 complex subunit delta-1 OS=Homo sapiens OX=9606 GN=AP3D1 PE=1 SV=1	13	0.165163	0.898253	17.4768	17.2737	17.3543	17.3327	17.5324	17.2401	17.1713	17.0692
	Q8N163	CCAR2_HUMAN Cell cycle and apoptosis regulator protein 2 OS=Homo sapiens OX=9606 GN=CCAR2 PE=1 SV=2	8	0.165297	0.561104	17.8023	17.2053	17.169	16.7549	19.0112	16.5073	16.6575	16.8378
	Q9P0V3	SH3B4_HUMAN SH3 domain-binding protein 4 OS=Homo sapiens OX=9606 GN=SH3BP4 PE=1 SV=1	4	0.16553	0.422238	15.7365	15.7225	14.5955	15.7303	16.4823	13.8709	17.0594	13.5746
	P09493	TPM1_HUMAN Tropomyosin alpha-1 chain OS=Homo sapiens OX=9606 GN=TPM1 PE=1 SV=2	5	0.165898	3.18054	18.1016	18.2978	17.8663	18.7356	18.4094	19.0186	13.9666	18.969
	O75400	PR40A_HUMAN Pre-mRNA-processing factor 40 homolog A OS=Homo sapiens OX=9606 GN=PRPF40A PE=1 SV=2	6	0.165979	1.92728	17.3531	18.6165	17.9893	18.0025	15.5097	17.9232	17.9167	18.0129
	P57772	SELB_HUMAN Selenocysteine-specific elongation factor OS=Homo sapiens OX=9606 GN=EEFSEC PE=1 SV=4	2	0.166291	0.529386	16.2461	14.4515	14.5893	15.8775	15.271	14.3243	16.016	13.7987
	P17931	LEG3_HUMAN Galectin-3 OS=Homo sapiens OX=9606 GN=LGALS3 PE=1 SV=5	4	0.166331	0.335848	17.3953	17.9608	17.1247	17.1658	17.4698	14.4523	17.8408	13.9554
	Q9Y2R9	RT07_HUMAN 28S ribosomal protein S7, mitochondrial OS=Homo sapiens OX=9606 GN=MRPS7 PE=1 SV=2	4	0.166691	0.435212	17.0432	14.0583	15.2378	15.9405	16.4622	16.56	16.5853	13.9689
	Q9BY44	EIF2A_HUMAN Eukaryotic translation initiation factor 2A OS=Homo sapiens OX=9606 GN=EIF2A PE=1 SV=3	12	0.167042	1.4127	17.8296	17.9561	18.2447	18.1514	16.7703	18.018	17.4786	18.1915
	P07910	HNRPC_HUMAN Heterogeneous nuclear ribonucleoproteins C1/C2 OS=Homo sapiens OX=9606 GN=HNRNPC PE=1 SV=4	11	0.167071	1.42197	18.1305	19.6639	19.3587	19.6281	19.3693	19.5734	19.5043	19.5289
	Q9BXB4	OSB11_HUMAN Oxysterol-binding protein-related protein 11 OS=Homo sapiens OX=9606 GN=OSBPL11 PE=1 SV=2	4	0.167464	0.575622	14.881	15.2814	14.8769	12.9629	14.9373	13.783	15.1399	14.6206
	Q92734	TFG_HUMAN Protein TFG OS=Homo sapiens OX=9606 GN=TFG PE=1 SV=2	3	0.167891	1.64271	17.8257	17.9511	17.8237	17.7664	15.9316	17.6872	17.0406	18.0811
	Q96KR1	ZFR_HUMAN Zinc finger RNA-binding protein OS=Homo sapiens OX=9606 GN=ZFR PE=1 SV=2	11	0.168024	0.709726	17.6271	16.668	16.2499	16.8061	17.4835	16.6045	17.2561	16.5592
	P23588	IF4B_HUMAN Eukaryotic translation initiation factor 4B OS=Homo sapiens OX=9606 GN=EIF4B PE=1 SV=2	9	0.168037	1.2436	17.0724	17.5252	17.1035	17.5714	17.0767	17.5886	17.8728	17.6983
	P13797	PLST_HUMAN Plastin-3 OS=Homo sapiens OX=9606 GN=PLS3 PE=1 SV=4	19	0.168193	1.15702	20.0559	20.1034	19.6299	20.0591	19.9395	19.9459	19.5292	19.8877
	P62258	1433E_HUMAN 14-3-3 protein epsilon OS=Homo sapiens OX=9606 GN=YWHAE PE=1 SV=1	16	0.168338	1.17288	22.2208	22.8467	22.6547	22.8379	22.5174	22.666	22.8904	22.853
	Q06210	GFPT1_HUMAN Glutamine--fructose-6-phosphate aminotransferase [isomerizing] 1 OS=Homo sapiens OX=9606 GN=GFPT1 PE=1 SV=3	12	0.168395	0.811987	17.5892	16.6639	16.8378	17.079	17.291	17.081	17.081	16.7733
	Q7Z4G4	TRM11_HUMAN tRNA (guanine(10)-N2)-methyltransferase homolog OS=Homo sapiens OX=9606 GN=TRMT11 PE=1 SV=1	3	0.168497	1.44224	14.1993	15.1209	14.8107	15.1251	15.2214	15.0137	13.7282	14.8132
	Q5VW36	FOCAD_HUMAN Focadhesin OS=Homo sapiens OX=9606 GN=FOCAD PE=1 SV=1	3	0.1685	0.499134	15.1477	13.7653	13.3504	14.2195	16.3564	13.9138	14.5894	13.5353
	P63162	RSMN_HUMAN Small nuclear ribonucleoprotein-associated protein N OS=Homo sapiens OX=9606 GN=SNRPN PE=1 SV=1;sp	4	0.169082	0.66992	18.1518	17.8501	17.0963	17.2966	18.6691	17.3543	17.922	17.0265
	Q9NXV6	CARF_HUMAN CDKN2A-interacting protein OS=Homo sapiens OX=9606 GN=CDKN2AIP PE=1 SV=3	5	0.169412	0.499484	16.4037	14.2938	13.9491	13.1979	15.0214	14.0755	13.8572	13.6583
	P62304	RUXE_HUMAN Small nuclear ribonucleoprotein E OS=Homo sapiens OX=9606 GN=SNRPE PE=1 SV=1	2	0.169696	2.2043	15.6978	18.5866	18.5311	18.1199	16.5323	18.6747	18.5497	18.491
	Q9Y450	HBS1L_HUMAN HBS1-like protein OS=Homo sapiens OX=9606 GN=HBS1L PE=1 SV=1	8	0.169784	0.810604	18.4033	17.8727	17.8766	17.7512	18.1544	17.5698	17.5641	17.593
	P07199	CENPB_HUMAN Major centromere autoantigen B OS=Homo sapiens OX=9606 GN=CENPB PE=1 SV=2	3	0.169857	1.63208	15.3466	14.2169	14.607	15.594	14.1194	15.6265	14.3151	15.7776
	Q8NFC6	BD1L1_HUMAN Biorientation of chromosomes in cell division protein 1-like 1 OS=Homo sapiens OX=9606 GN=BOD1L1 PE=1 SV=2	3	0.169903	0.645731	14.5223	14.9363	14.9681	13.2856	14.3078	14.3002	15.2658	14.0178
	P43686	PRS6B_HUMAN 26S proteasome regulatory subunit 6B OS=Homo sapiens OX=9606 GN=PSMC4 PE=1 SV=2	18	0.169975	0.858099	18.595	18.4928	18.3346	18.5862	18.6145	18.1022	18.7027	18.1826
	Q9Y4P1	ATG4B_HUMAN Cysteine protease ATG4B OS=Homo sapiens OX=9606 GN=ATG4B PE=1 SV=2	4	0.169994	1.17266	15.8854	16.1434	16.0622	15.898	15.459	16.031	15.9452	16.1986
	Q8N1B4	VPS52_HUMAN Vacuolar protein sorting-associated protein 52 homolog OS=Homo sapiens OX=9606 GN=VPS52 PE=1 SV=1	2	0.170085	1.38931	14.1865	15.2539	14.3901	15.3126	14.3595	14.9646	15.3546	14.6572
	Q96P16	RPR1A_HUMAN Regulation of nuclear pre-mRNA domain-containing protein 1A OS=Homo sapiens OX=9606 GN=RPRD1A PE=1 SV=1	1	0.170637	0.64255	16.2771	14.8019	15.5556	14.8123	15.3762	15.156	14.4564	14.3427
	Q9UNS2	CSN3_HUMAN COP9 signalosome complex subunit 3 OS=Homo sapiens OX=9606 GN=COPS3 PE=1 SV=3	11	0.170738	0.755161	18.9436	17.7299	17.9619	18.2276	18.5082	17.9652	17.9659	17.8362
	O15400	STX7_HUMAN Syntaxin-7 OS=Homo sapiens OX=9606 GN=STX7 PE=1 SV=4	3	0.170825	2.1833	14.5152	15.7293	16.2085	16.0493	16.4594	16.6198	13.6919	16.9826
	Q9P2B2	FPRP_HUMAN Prostaglandin F2 receptor negative regulator OS=Homo sapiens OX=9606 GN=PTGFRN PE=1 SV=2	9	0.171053	0.749593	17.2506	16.4377	16.739	16.7811	17.3965	16.2094	16.3746	16.6693
	O95747	OXSR1_HUMAN Serine/threonine-protein kinase OSR1 OS=Homo sapiens OX=9606 GN=OXSR1 PE=1 SV=1	6	0.171389	1.17964	17.0693	17.7789	17.4822	17.3926	17.6109	17.5218	17.1421	17.5646
	P52565	GDIR1_HUMAN Rho GDP-dissociation inhibitor 1 OS=Homo sapiens OX=9606 GN=ARHGDIA PE=1 SV=3	9	0.172076	1.15396	21.6635	21.7023	21.4465	21.6683	21.5565	21.6234	21.0668	21.5656
	P29401	TKT_HUMAN Transketolase OS=Homo sapiens OX=9606 GN=TKT PE=1 SV=3	27	0.172323	1.14022	22.2464	22.8573	22.6418	22.7963	22.7714	22.7111	22.5798	22.632
	P82650	RT22_HUMAN 28S ribosomal protein S22, mitochondrial OS=Homo sapiens OX=9606 GN=MRPS22 PE=1 SV=1	5	0.17267	0.468955	16.1068	15.3929	16.0594	15.4208	16.0447	15.16	14.8992	12.7665
	Q05D32	CTSL2_HUMAN CTD small phosphatase-like protein 2 OS=Homo sapiens OX=9606 GN=CTDSPL2 PE=1 SV=2	2	0.172691	0.593685	16.5804	13.8486	15.7042	15.1282	15.1999	15.3771	15.1887	15.3103
	Q13057	COASY_HUMAN Bifunctional coenzyme A synthase OS=Homo sapiens OX=9606 GN=COASY PE=1 SV=4	6	0.17279	0.864449	16.1333	15.8267	15.6518	15.7226	15.989	15.8454	16.2718	15.8106
	P30626	SORCN_HUMAN Sorcin OS=Homo sapiens OX=9606 GN=SRI PE=1 SV=1	6	0.173162	1.38159	17.2325	17.303	17.2038	17.338	17.0861	17.4387	15.9815	17.2896
	P17677	NEUM_HUMAN Neuromodulin OS=Homo sapiens OX=9606 GN=GAP43 PE=1 SV=1	6	0.173219	0.323258	18.2603	14.7477	14.163	13.8368	17.0563	14.6441	14.2347	13.9687
	P80303	NUCB2_HUMAN Nucleobindin-2 OS=Homo sapiens OX=9606 GN=NUCB2 PE=1 SV=3	11	0.173899	0.873219	17.9094	17.421	17.4	17.3314	17.5323	17.3131	17.3649	17.3587
	P52306	GDS1_HUMAN Rap1 GTPase-GDP dissociation stimulator 1 OS=Homo sapiens OX=9606 GN=RAP1GDS1 PE=1 SV=3	7	0.175102	0.645526	17.3733	15.3781	17.2081	16.7833	17.2112	16.8561	16.4174	16.6668
	O43765	SGTA_HUMAN Small glutamine-rich tetratricopeptide repeat-containing protein alpha OS=Homo sapiens OX=9606 GN=SGTA PE=1 SV=1	5	0.17516	2.5969	16.82	17.7315	13.8024	17.895	18.0103	17.6691	16.5593	17.4036
	O00560	SDCB1_HUMAN Syntenin-1 OS=Homo sapiens OX=9606 GN=SDCBP PE=1 SV=1	3	0.175765	1.33743	16.5932	17.8043	17.8528	17.6468	17.4944	17.7609	17.4871	17.8934
	Q9H0U4	RAB1B_HUMAN Ras-related protein Rab-1B OS=Homo sapiens OX=9606 GN=RAB1B PE=1 SV=1;sp	4	0.175875	1.68393	17.8419	19.3169	19.3157	19.4028	18.1192	19.6432	19.8503	19.7715
	P05556	ITB1_HUMAN Integrin beta-1 OS=Homo sapiens OX=9606 GN=ITGB1 PE=1 SV=2	8	0.176091	0.770172	19.0619	18.2037	18.7145	18.2073	18.006	17.9395	18.2351	18.16
	O94826	TOM70_HUMAN Mitochondrial import receptor subunit TOM70 OS=Homo sapiens OX=9606 GN=TOMM70 PE=1 SV=1	12	0.176353	1.24784	18.3134	18.2869	18.6352	18.7377	18.4208	18.6706	17.7997	18.7517
	P62081	RS7_HUMAN 40S ribosomal protein S7 OS=Homo sapiens OX=9606 GN=RPS7 PE=1 SV=1	6	0.176543	0.599735	18.6087	18.6068	19.4554	18.1346	18.7723	18.9968	20.5752	18.7231
	P49411	EFTU_HUMAN Elongation factor Tu, mitochondrial OS=Homo sapiens OX=9606 GN=TUFM PE=1 SV=2	14	0.176781	1.34765	18.4911	18.5773	19.0425	19.202	18.0878	19.3	18.9822	19.2461
	Q92598	HS105_HUMAN Heat shock protein 105 kDa OS=Homo sapiens OX=9606 GN=HSPH1 PE=1 SV=1	28	0.178353	1.24874	18.8548	19.421	19.4284	19.4352	18.7436	19.4648	19.5827	19.5704
	P00167	CYB5_HUMAN Cytochrome b5 OS=Homo sapiens OX=9606 GN=CYB5A PE=1 SV=2	3	0.17836	0.621281	17.8912	16.0852	16.2721	16.6455	17.0898	16.318	16.191	15.6485
	O75489	NDUS3_HUMAN NADH dehydrogenase [ubiquinone] iron-sulfur protein 3, mitochondrial OS=Homo sapiens OX=9606 GN=NDUFS3 PE=1 SV=1	6	0.178728	0.796817	17.4731	17.2892	17.4431	16.8231	16.9349	17.2278	17.8516	17.0519
	P53007	TXTP_HUMAN Tricarboxylate transport protein, mitochondrial OS=Homo sapiens OX=9606 GN=SLC25A1 PE=1 SV=2	3	0.180964	1.22637	17.4929	17.4835	16.9291	17.1918	17.0362	17.3018	16.6011	17.2598
	Q9C0B1	FTO_HUMAN Alpha-ketoglutarate-dependent dioxygenase FTO OS=Homo sapiens OX=9606 GN=FTO PE=1 SV=3	9	0.181065	0.634695	16.1772	14.5191	16.7638	15.5201	15.5177	16.1601	16.1463	15.7823
	Q04206	TF65_HUMAN Transcription factor p65 OS=Homo sapiens OX=9606 GN=RELA PE=1 SV=2	5	0.181278	2.17246	16.7478	16.1217	16.4744	16.8214	14.0578	16.5515	14.1524	16.4151
	P26440	IVD_HUMAN Isovaleryl-CoA dehydrogenase, mitochondrial OS=Homo sapiens OX=9606 GN=IVD PE=1 SV=2	3	0.181283	2.37738	13.5967	14.6324	16.6847	16.2333	14.5395	16.5104	13.7985	16.2407
	Q14974	IMB1_HUMAN Importin subunit beta-1 OS=Homo sapiens OX=9606 GN=KPNB1 PE=1 SV=2	24	0.181453	1.09653	20.024	20.2793	20.2214	20.1989	19.9252	20.2801	20.296	20.24
	Q15369	ELOC_HUMAN Elongin-C OS=Homo sapiens OX=9606 GN=ELOC PE=1 SV=1	4	0.181969	1.50417	17.5224	17.7813	18.215	18.6122	18.5751	18.7681	17.7873	19.2941
	Q13151	ROA0_HUMAN Heterogeneous nuclear ribonucleoprotein A0 OS=Homo sapiens OX=9606 GN=HNRNPA0 PE=1 SV=1	7	0.182268	0.792317	18.1023	18.3183	17.8882	17.9726	18.5781	17.6566	18.3129	17.5905
	O94760	DDAH1_HUMAN N(G),N(G)-dimethylarginine dimethylaminohydrolase 1 OS=Homo sapiens OX=9606 GN=DDAH1 PE=1 SV=3	9	0.182511	1.38918	16.669	17.85	17.8353	17.6606	17.2632	18.1062	17.9773	18.025
	P08865	RSSA_HUMAN 40S ribosomal protein SA OS=Homo sapiens OX=9606 GN=RPSA PE=1 SV=4	14	0.182603	0.868376	20.8144	20.656	20.6138	20.5348	20.5755	20.2128	20.4424	20.2281
	O00541	PESC_HUMAN Pescadillo homolog OS=Homo sapiens OX=9606 GN=PES1 PE=1 SV=1	5	0.182819	1.71633	14.7575	16.1361	16.3969	15.8433	16.1021	16.4184	14.3399	16.3159
	P09104	ENOG_HUMAN Gamma-enolase OS=Homo sapiens OX=9606 GN=ENO2 PE=1 SV=3	9	0.183045	0.828794	17.2956	17.6059	17.8631	17.1678	17.5752	17.46	17.9916	17.4082
	P62277	RS13_HUMAN 40S ribosomal protein S13 OS=Homo sapiens OX=9606 GN=RPS13 PE=1 SV=2	3	0.18311	0.693171	19.0859	19.609	19.6121	18.441	19.9017	19.4677	20.1933	19.1604
	Q9NTJ5	SAC1_HUMAN Phosphatidylinositide phosphatase SAC1 OS=Homo sapiens OX=9606 GN=SACM1L PE=1 SV=2	9	0.183142	1.31332	16.3218	16.8489	16.2416	16.7249	16.9195	16.4298	15.7253	16.7774
	Q9BVL2	NUP58_HUMAN Nucleoporin p58/p45 OS=Homo sapiens OX=9606 GN=NUP58 PE=1 SV=1	3	0.183319	0.659893	16.3907	14.4	16.0237	15.8051	16.2516	16.0598	15.8268	15.8291
	P49790	NU153_HUMAN Nuclear pore complex protein Nup153 OS=Homo sapiens OX=9606 GN=NUP153 PE=1 SV=2	11	0.183778	1.62967	17.1605	18.9998	16.7753	17.5415	17.7738	17.2526	16.7145	17.4486
	P55884	EIF3B_HUMAN Eukaryotic translation initiation factor 3 subunit B OS=Homo sapiens OX=9606 GN=EIF3B PE=1 SV=3	23	0.183868	1.08408	19.0409	19.2436	19.0592	19.3038	19.3726	19.2595	19.128	19.2597
	Q96DH6	MSI2H_HUMAN RNA-binding protein Musashi homolog 2 OS=Homo sapiens OX=9606 GN=MSI2 PE=1 SV=1	5	0.184014	1.45919	16.9206	16.8608	17.0314	16.5929	15.6979	17.3031	16.026	17.0998
	P14635	CCNB1_HUMAN G2/mitotic-specific cyclin-B1 OS=Homo sapiens OX=9606 GN=CCNB1 PE=1 SV=1	3	0.184104	0.548135	16.0546	13.5986	16.474	15.8251	15.905	15.9656	16.1944	15.7691
	Q8NCW5	NNRE_HUMAN NAD(P)H-hydrate epimerase OS=Homo sapiens OX=9606 GN=NAXE PE=1 SV=2	5	0.184304	3.07541	16.0638	17.4888	17.717	16.9972	17.2353	17.6846	13.0843	18.4129
	Q8N2K0	ABD12_HUMAN Lysophosphatidylserine lipase ABHD12 OS=Homo sapiens OX=9606 GN=ABHD12 PE=1 SV=2	5	0.18441	0.896411	17.0189	16.8295	16.8977	16.9051	16.7435	16.8021	17.0497	16.542
	Q99805	TM9S2_HUMAN Transmembrane 9 superfamily member 2 OS=Homo sapiens OX=9606 GN=TM9SF2 PE=1 SV=1	6	0.184486	0.76648	17.5353	16.628	16.7555	16.9426	17.624	16.8236	16.7048	16.6907
	P84077	ARF1_HUMAN ADP-ribosylation factor 1 OS=Homo sapiens OX=9606 GN=ARF1 PE=1 SV=2;sp	3	0.18451	1.46956	17.9054	18.1365	18.8676	18.2685	17.9276	19.0321	17.6039	19.0888
	P51617	IRAK1_HUMAN Interleukin-1 receptor-associated kinase 1 OS=Homo sapiens OX=9606 GN=IRAK1 PE=1 SV=2	5	0.186055	0.547365	15.3035	13.9326	13.733	13.7339	16.2189	13.8317	14.2454	14.525
	O75525	KHDR3_HUMAN KH domain-containing, RNA-binding, signal transduction-associated protein 3 OS=Homo sapiens OX=9606 GN=KHDRBS3 PE=1 SV=1	4	0.186079	0.303185	17.4418	17.4835	18.1404	17.5447	16.4848	13.3608	17.3132	14.1043
	P13861	KAP2_HUMAN cAMP-dependent protein kinase type II-alpha regulatory subunit OS=Homo sapiens OX=9606 GN=PRKAR2A PE=1 SV=2	7	0.186396	0.785801	18.578	17.5141	17.5411	17.8419	17.934	17.5113	17.8118	17.6066
	P20020	AT2B1_HUMAN Plasma membrane calcium-transporting ATPase 1 OS=Homo sapiens OX=9606 GN=ATP2B1 PE=1 SV=4	4	0.18649	1.36904	15.0456	15.6261	14.47	15.6181	15.7773	15.7706	15.6525	15.7433
	O15258	RER1_HUMAN Protein RER1 OS=Homo sapiens OX=9606 GN=RER1 PE=1 SV=1	4	0.187274	1.23362	17.0021	17.2409	17.3317	17.7978	17.533	17.8588	17.6431	17.8239
	P83916	CBX1_HUMAN Chromobox protein homolog 1 OS=Homo sapiens OX=9606 GN=CBX1 PE=1 SV=1	2	0.187519	0.273852	17.6545	13.4127	13.8657	17.2277	17.3036	14.4853	17.4666	13.6906
	A6NHL2	TBAL3_HUMAN Tubulin alpha chain-like 3 OS=Homo sapiens OX=9606 GN=TUBAL3 PE=1 SV=2	1	0.187949	1.30429	19.3995	20.3011	19.1724	19.6799	19.0785	19.6691	19.8077	19.341
	P60174	TPIS_HUMAN Triosephosphate isomerase OS=Homo sapiens OX=9606 GN=TPI1 PE=1 SV=3	14	0.18831	1.35931	20.6444	21.4798	21.7112	21.9163	20.8702	21.8084	21.6935	21.4863
	P53621	COPA_HUMAN Coatomer subunit alpha OS=Homo sapiens OX=9606 GN=COPA PE=1 SV=2	28	0.188341	1.26009	17.2362	17.8869	17.631	18.0208	18.048	17.7427	17.1047	17.7037
	Q9BVK6	TMED9_HUMAN Transmembrane emp24 domain-containing protein 9 OS=Homo sapiens OX=9606 GN=TMED9 PE=1 SV=2	3	0.1886	1.53013	16.5097	17.7566	17.9183	17.5015	16.7861	17.9853	17.9272	18.3524
	Q96T23	RSF1_HUMAN Remodeling and spacing factor 1 OS=Homo sapiens OX=9606 GN=RSF1 PE=1 SV=2	9	0.188737	0.573823	14.8953	14.0759	15.3561	14.4047	16.3935	14.332	13.8177	14.4448
	Q9UQ35	SRRM2_HUMAN Serine/arginine repetitive matrix protein 2 OS=Homo sapiens OX=9606 GN=SRRM2 PE=1 SV=2	17	0.189003	1.1894	17.5477	18.1289	18.0679	17.6147	17.5761	18.0415	17.5783	17.9858
	P20618	PSB1_HUMAN Proteasome subunit beta type-1 OS=Homo sapiens OX=9606 GN=PSMB1 PE=1 SV=2	8	0.189278	1.19071	19.6812	19.4934	19.8097	19.9244	19.2529	19.8839	19.2906	19.74
	Q9Y5T5	UBP16_HUMAN Ubiquitin carboxyl-terminal hydrolase 16 OS=Homo sapiens OX=9606 GN=USP16 PE=1 SV=1	3	0.190313	1.58371	14.4139	14.8962	12.9354	15.1745	14.5436	14.511	13.9994	13.9638
	P56192	SYMC_HUMAN Methionine--tRNA ligase, cytoplasmic OS=Homo sapiens OX=9606 GN=MARS1 PE=1 SV=2	21	0.190969	1.13533	17.864	17.8391	17.8054	17.81	17.4017	17.8213	17.7599	18.093
	Q96DV4	RM38_HUMAN 39S ribosomal protein L38, mitochondrial OS=Homo sapiens OX=9606 GN=MRPL38 PE=1 SV=2	3	0.19113	1.80125	15.7155	16.4124	13.9259	16.0239	15.1743	16.2855	16.6575	16.1474
	P30101	PDIA3_HUMAN Protein disulfide-isomerase A3 OS=Homo sapiens OX=9606 GN=PDIA3 PE=1 SV=4	23	0.19136	1.25396	20.4763	21.3629	20.8087	21.4424	21.4559	21.2181	21.1821	21.2056
	Q13614	MTMR2_HUMAN Myotubularin-related protein 2 OS=Homo sapiens OX=9606 GN=MTMR2 PE=1 SV=4	3	0.192129	0.738998	14.4135	14.7775	14.8526	14.6915	15.5096	13.9816	14.7016	14.2814
	O14828	SCAM3_HUMAN Secretory carrier-associated membrane protein 3 OS=Homo sapiens OX=9606 GN=SCAMP3 PE=1 SV=3	5	0.192173	1.4287	17.0692	17.5784	18.1614	17.7358	16.6664	18.0745	17.5756	18.1427
	P31937	3HIDH_HUMAN 3-hydroxyisobutyrate dehydrogenase, mitochondrial OS=Homo sapiens OX=9606 GN=HIBADH PE=1 SV=2	6	0.192701	1.20963	16.824	17.5319	17.4549	17.6133	17.0493	17.4066	17.6176	17.4922
	P35659	DEK_HUMAN Protein DEK OS=Homo sapiens OX=9606 GN=DEK PE=1 SV=1	8	0.193021	0.792918	17.2552	16.6369	17.7006	16.9868	17.2288	17.359	17.6269	17.4897
	P49189	AL9A1_HUMAN 4-trimethylaminobutyraldehyde dehydrogenase OS=Homo sapiens OX=9606 GN=ALDH9A1 PE=1 SV=3	4	0.193397	3.69373	14.55	14.7879	18.1471	17.3531	13.9078	17.7448	13.3612	17.6206
	O95376	ARI2_HUMAN E3 ubiquitin-protein ligase ARIH2 OS=Homo sapiens OX=9606 GN=ARIH2 PE=1 SV=1	4	0.194152	1.37182	14.5122	14.8548	14.8249	15.2892	14.1813	15.0401	13.9709	14.1294
	Q9HA64	KT3K_HUMAN Ketosamine-3-kinase OS=Homo sapiens OX=9606 GN=FN3KRP PE=1 SV=2	2	0.195018	1.48519	15.8314	15.9189	16.3881	16.0178	14.9361	16.0305	14.7386	16.2095
	Q9Y6X4	F169A_HUMAN Soluble lamin-associated protein of 75 kDa OS=Homo sapiens OX=9606 GN=FAM169A PE=1 SV=2	3	0.195268	0.735133	15.7738	14.4544	14.4215	14.501	14.9498	14.3873	14.5927	14.6195
	P04080	CYTB_HUMAN Cystatin-B OS=Homo sapiens OX=9606 GN=CSTB PE=1 SV=2	2	0.195354	0.442316	17.2729	13.7553	17.6191	16.9353	17.0414	17.214	17.2491	16.5705
	P63167	DYL1_HUMAN Dynein light chain 1, cytoplasmic OS=Homo sapiens OX=9606 GN=DYNLL1 PE=1 SV=1	1	0.1955	0.712545	17.7611	18.2393	18.8603	18.0477	19.1891	18.4611	19.0347	18.1413
	Q99470	SDF2_HUMAN Stromal cell-derived factor 2 OS=Homo sapiens OX=9606 GN=SDF2 PE=1 SV=2	4	0.195953	0.485031	16.8099	15.4805	14.2725	15.1517	17.4158	14.4823	15.8048	15.013
	Q6NZI2	CAVN1_HUMAN Caveolae-associated protein 1 OS=Homo sapiens OX=9606 GN=CAVIN1 PE=1 SV=1	9	0.196386	0.764442	18.8475	18.5525	19.9536	18.9269	19.0723	19.1005	19.1724	18.9158
	Q5SW79	CE170_HUMAN Centrosomal protein of 170 kDa OS=Homo sapiens OX=9606 GN=CEP170 PE=1 SV=1	14	0.197537	2.40632	17.3012	17.061	17.052	17.2872	16.7121	17.813	13.6219	17.5933
	Q12929	EPS8_HUMAN Epidermal growth factor receptor kinase substrate 8 OS=Homo sapiens OX=9606 GN=EPS8 PE=1 SV=1	7	0.197647	0.550282	15.376	14.1178	14.502	15.3202	15.8973	15.5115	16.253	13.6318
	P22830	HEMH_HUMAN Ferrochelatase, mitochondrial OS=Homo sapiens OX=9606 GN=FECH PE=1 SV=2	7	0.198184	0.565837	15.9762	13.5493	16.3915	15.3431	15.0532	15.8182	15.7809	15.205
	P15531	NDKA_HUMAN Nucleoside diphosphate kinase A OS=Homo sapiens OX=9606 GN=NME1 PE=1 SV=1	5	0.198596	1.35467	19.9984	21.0741	20.7115	20.926	20.0059	20.9635	21.2013	20.7052
	Q96IU4	ABHEB_HUMAN Protein ABHD14B OS=Homo sapiens OX=9606 GN=ABHD14B PE=1 SV=1	4	0.199265	1.4969	16.2176	16.4898	15.0414	16.7788	15.6934	16.7566	16.3858	15.641
	O75179	ANR17_HUMAN Ankyrin repeat domain-containing protein 17 OS=Homo sapiens OX=9606 GN=ANKRD17 PE=1 SV=3	4	0.199422	0.808787	16.1661	16.4494	16.5026	16.1506	16.1836	16.1046	16.7521	15.6752
	Q96LD4	TRI47_HUMAN E3 ubiquitin-protein ligase TRIM47 OS=Homo sapiens OX=9606 GN=TRIM47 PE=1 SV=2	2	0.199996	0.585538	15.6366	13.424	14.7034	14.4648	14.5653	14.3491	13.5685	13.1472
	P02511	CRYAB_HUMAN Alpha-crystallin B chain OS=Homo sapiens OX=9606 GN=CRYAB PE=1 SV=2	8	0.200462	0.698409	21.3896	21.2703	21.0755	21.3236	22.6395	21.4537	22.0904	21.0759
	Q53GQ0	DHB12_HUMAN Very-long-chain 3-oxoacyl-CoA reductase OS=Homo sapiens OX=9606 GN=HSD17B12 PE=1 SV=2	7	0.201432	1.92261	16.9335	17.1923	17.1744	17.5107	17.2644	17.4515	14.5274	17.5175
	Q9NQW7	XPP1_HUMAN Xaa-Pro aminopeptidase 1 OS=Homo sapiens OX=9606 GN=XPNPEP1 PE=1 SV=3	8	0.20146	0.535792	16.1811	13.5615	16.2075	15.5172	16.4602	16.1409	16.231	16.2593
	P30622	CLIP1_HUMAN CAP-Gly domain-containing linker protein 1 OS=Homo sapiens OX=9606 GN=CLIP1 PE=1 SV=2	17	0.201592	0.400632	16.5663	13.827	16.8964	15.1787	16.1494	16.4939	14.3837	13.2176
	O75828	CBR3_HUMAN Carbonyl reductase [NADPH] 3 OS=Homo sapiens OX=9606 GN=CBR3 PE=1 SV=3	1	0.201644	1.83921	14.0348	16.0283	15.7665	15.7762	14.3092	15.3315	13.6897	14.1805
	Q13505	MTX1_HUMAN Metaxin-1 OS=Homo sapiens OX=9606 GN=MTX1 PE=1 SV=3	7	0.202078	1.37337	16.4718	16.5853	16.6689	16.4458	15.9666	16.4469	15.2683	16.7284
	O00139	KIF2A_HUMAN Kinesin-like protein KIF2A OS=Homo sapiens OX=9606 GN=KIF2A PE=1 SV=3	6	0.202203	0.628726	15.6983	14.2169	15.3973	15.2371	15.9335	15.1485	14.3255	14.074
	Q14152	EIF3A_HUMAN Eukaryotic translation initiation factor 3 subunit A OS=Homo sapiens OX=9606 GN=EIF3A PE=1 SV=1	35	0.20226	1.17928	18.323	18.5951	18.7605	18.6665	18.0789	18.7376	18.6896	18.8045
	Q15345	LRC41_HUMAN Leucine-rich repeat-containing protein 41 OS=Homo sapiens OX=9606 GN=LRRC41 PE=1 SV=3	4	0.202495	0.677554	15.4183	14.4177	14.9275	13.8049	13.7061	14.0183	14.3545	13.9191
	Q9UBU9	NXF1_HUMAN Nuclear RNA export factor 1 OS=Homo sapiens OX=9606 GN=NXF1 PE=1 SV=1	4	0.202884	1.77123	15.5465	16.6236	14.9609	14.6899	13.6733	15.7927	15.3354	15.7088
	Q15276	RABE1_HUMAN Rab GTPase-binding effector protein 1 OS=Homo sapiens OX=9606 GN=RABEP1 PE=1 SV=2	6	0.20312	0.79416	16.3455	15.33	16.0585	15.6991	15.3989	15.6725	15.6239	15.3953
	Q6P6C2	ALKB5_HUMAN RNA demethylase ALKBH5 OS=Homo sapiens OX=9606 GN=ALKBH5 PE=1 SV=2	4	0.203157	0.525883	16.726	14.0625	14.0391	14.2073	14.8059	13.6911	13.9916	13.8929
	P11166	GTR1_HUMAN Solute carrier family 2, facilitated glucose transporter member 1 OS=Homo sapiens OX=9606 GN=SLC2A1 PE=1 SV=2	7	0.203977	1.13332	18.7809	19.0638	18.8949	19.4408	19.0635	19.0753	19.0925	18.9741
	P10809	CH60_HUMAN 60 kDa heat shock protein, mitochondrial OS=Homo sapiens OX=9606 GN=HSPD1 PE=1 SV=2	29	0.205026	1.14484	21.8415	22.0708	21.7255	21.8382	21.4181	21.9558	22.0323	21.9331
	Q13126	MTAP_HUMAN S-methyl-5-thioadenosine phosphorylase OS=Homo sapiens OX=9606 GN=MTAP PE=1 SV=2	10	0.205058	0.888456	18.4248	18.4389	18.8361	18.2529	18.6807	18.6428	18.639	18.5635
	Q96T76	MMS19_HUMAN MMS19 nucleotide excision repair protein homolog OS=Homo sapiens OX=9606 GN=MMS19 PE=1 SV=2	8	0.206609	0.861219	16.2166	16.1214	16.3533	15.9195	16.2135	15.7544	15.7505	15.8764
	Q9BT78	CSN4_HUMAN COP9 signalosome complex subunit 4 OS=Homo sapiens OX=9606 GN=COPS4 PE=1 SV=1	9	0.206727	0.715042	17.67	15.9536	17.0752	16.5985	16.4103	16.7711	16.4919	16.3887
	Q9P265	DIP2B_HUMAN Disco-interacting protein 2 homolog B OS=Homo sapiens OX=9606 GN=DIP2B PE=1 SV=3	3	0.206755	0.722585	16.0231	14.6073	15.1593	15.3703	15.9429	15.1607	14.8555	14.9674
	Q96QK1	VPS35_HUMAN Vacuolar protein sorting-associated protein 35 OS=Homo sapiens OX=9606 GN=VPS35 PE=1 SV=2	16	0.206953	1.19204	18.6574	19.2254	18.9787	19.1998	18.7817	19.2577	19.4702	19.2188
	Q8IZ83	A16A1_HUMAN Aldehyde dehydrogenase family 16 member A1 OS=Homo sapiens OX=9606 GN=ALDH16A1 PE=1 SV=2	5	0.206995	0.777874	17.8947	17.0872	17.5801	17.1755	17.2981	16.8026	16.7475	17.0056
	Q13439	GOGA4_HUMAN Golgin subfamily A member 4 OS=Homo sapiens OX=9606 GN=GOLGA4 PE=1 SV=1	14	0.207007	0.6327	16.443	15.2373	15.6026	15.5542	16.178	15.1205	14.6785	14.3484
	O00592	PODXL_HUMAN Podocalyxin OS=Homo sapiens OX=9606 GN=PODXL PE=1 SV=2	2	0.207099	0.321656	19.0127	14.3692	16.2551	17.4733	17.8066	14.0383	17.1981	17.846
	P56182	RRP1_HUMAN Ribosomal RNA processing protein 1 homolog A OS=Homo sapiens OX=9606 GN=RRP1 PE=1 SV=1	2	0.207307	2.02504	15.2043	16.3298	16.7461	16.5238	16.1802	16.2814	13.4727	16.5401
	Q9UPY8	MARE3_HUMAN Microtubule-associated protein RP/EB family member 3 OS=Homo sapiens OX=9606 GN=MAPRE3 PE=1 SV=1	2	0.207409	2.06192	15.2419	16.404	16.986	16.7664	13.8349	16.8589	16.7224	16.9319
	P00492	HPRT_HUMAN Hypoxanthine-guanine phosphoribosyltransferase OS=Homo sapiens OX=9606 GN=HPRT1 PE=1 SV=2	10	0.207716	1.21386	18.4521	19.1396	18.9058	18.876	18.6648	19.3338	19.262	19.0538
	O43660	PLRG1_HUMAN Pleiotropic regulator 1 OS=Homo sapiens OX=9606 GN=PLRG1 PE=1 SV=1	8	0.208091	0.429953	16.6582	14.1539	16.9859	13.6357	16.6862	15.827	14.6459	16.4885
	O95104	SCAF4_HUMAN SR-related and CTD-associated factor 4 OS=Homo sapiens OX=9606 GN=SCAF4 PE=1 SV=3	2	0.208136	0.681566	16.9213	15.4105	17.4803	16.4926	16.5655	16.99	16.7396	16.6013
	Q13501	SQSTM_HUMAN Sequestosome-1 OS=Homo sapiens OX=9606 GN=SQSTM1 PE=1 SV=1	7	0.208161	3.98301	18.7652	19.4744	18.221	19.3306	19.2127	19.209	13.1401	19.3003
	Q9UKG1	DP13A_HUMAN DCC-interacting protein 13-alpha OS=Homo sapiens OX=9606 GN=APPL1 PE=1 SV=1	6	0.208244	0.772743	17.3882	16.7748	16.6563	16.3499	16.4582	16.598	16.7033	15.9955
	Q9NY12	GAR1_HUMAN H/ACA ribonucleoprotein complex subunit 1 OS=Homo sapiens OX=9606 GN=GAR1 PE=1 SV=1	2	0.208524	1.21045	15.22	15.6003	15.0821	15.1115	14.6482	15.2336	14.7985	14.9055
	P11766	ADHX_HUMAN Alcohol dehydrogenase class-3 OS=Homo sapiens OX=9606 GN=ADH5 PE=1 SV=4	7	0.208925	0.853275	17.6149	17.9304	17.7015	17.4943	18.0557	17.4685	17.7563	17.3196
	Q14554	PDIA5_HUMAN Protein disulfide-isomerase A5 OS=Homo sapiens OX=9606 GN=PDIA5 PE=1 SV=1	10	0.209151	0.537861	17.8119	16.2064	15.3103	16.1308	18.0833	15.9586	16.6416	15.9726
	Q9H0H5	RGAP1_HUMAN Rac GTPase-activating protein 1 OS=Homo sapiens OX=9606 GN=RACGAP1 PE=1 SV=1	2	0.209154	0.662726	15.3684	14.2353	14.5251	14.7168	14.7998	13.9587	13.9059	13.3143
	Q13426	XRCC4_HUMAN DNA repair protein XRCC4 OS=Homo sapiens OX=9606 GN=XRCC4 PE=1 SV=2	2	0.209257	1.98145	15.6772	14.5777	12.9291	16.0621	14.5791	14.8352	13.359	15.0157
	Q9P2K5	MYEF2_HUMAN Myelin expression factor 2 OS=Homo sapiens OX=9606 GN=MYEF2 PE=1 SV=3	7	0.209354	1.13316	16.7424	17.1703	16.8062	16.66	16.651	16.774	16.7823	17.0991
	P10301	RRAS_HUMAN Ras-related protein R-Ras OS=Homo sapiens OX=9606 GN=RRAS PE=1 SV=1	2	0.209622	1.46829	14.5778	16.2355	15.4648	15.2429	14.5216	15.5929	15.8828	15.5924
	Q99729	ROAA_HUMAN Heterogeneous nuclear ribonucleoprotein A/B OS=Homo sapiens OX=9606 GN=HNRNPAB PE=1 SV=2	4	0.20975	1.23039	18.0546	18.4565	17.5401	18.2712	17.6288	17.7661	17.8168	17.743
	Q9UI12	VATH_HUMAN V-type proton ATPase subunit H OS=Homo sapiens OX=9606 GN=ATP6V1H PE=1 SV=1	8	0.209819	0.828078	17.2345	16.6736	16.4998	16.5998	16.8228	16.4577	16.5242	16.2616
	Q15126	PMVK_HUMAN Phosphomevalonate kinase OS=Homo sapiens OX=9606 GN=PMVK PE=1 SV=3	4	0.210586	0.625133	17.1483	16.607	17.0956	15.0478	16.5766	16.9591	17.4116	16.9071
	P27701	CD82_HUMAN CD82 antigen OS=Homo sapiens OX=9606 GN=CD82 PE=1 SV=1	3	0.2106	2.10284	14.902	15.6211	16.4213	16.241	13.3466	16.5993	16.3018	16.7997
	Q8NAV1	PR38A_HUMAN Pre-mRNA-splicing factor 38A OS=Homo sapiens OX=9606 GN=PRPF38A PE=1 SV=1	2	0.210896	0.632648	14.0954	13.4424	15.8959	14.4132	14.9956	14.7444	14.8493	14.594
	P28161	GSTM2_HUMAN Glutathione S-transferase Mu 2 OS=Homo sapiens OX=9606 GN=GSTM2 PE=1 SV=2	5	0.211134	1.35408	15.9617	17.5422	17.2	17.0444	17.1566	17.3347	17.0058	17.152
	Q14839	CHD4_HUMAN Chromodomain-helicase-DNA-binding protein 4 OS=Homo sapiens OX=9606 GN=CHD4 PE=1 SV=2	20	0.212208	0.789371	18.0461	16.9605	17.2535	17.2978	17.8018	17.2521	17.0564	17.2826
	Q9NZ32	ARP10_HUMAN Actin-related protein 10 OS=Homo sapiens OX=9606 GN=ACTR10 PE=1 SV=1	5	0.212883	1.5761	14.5417	16.6111	15.3489	15.7857	16.2428	16.0337	14.8737	15.2021
	Q02790	FKBP4_HUMAN Peptidyl-prolyl cis-trans isomerase FKBP4 OS=Homo sapiens OX=9606 GN=FKBP4 PE=1 SV=3	13	0.213334	1.19488	17.7567	17.6251	18.0649	18.3908	17.6733	18.2193	17.8113	18.0984
	Q9C0E8	LNP_HUMAN Endoplasmic reticulum junction formation protein lunapark OS=Homo sapiens OX=9606 GN=LNPK PE=1 SV=2	2	0.213705	0.438345	16.516	14.3727	14.5903	13.5832	16.4163	13.549	15.3643	16.6227
	Q9P0M9	RM27_HUMAN 39S ribosomal protein L27, mitochondrial OS=Homo sapiens OX=9606 GN=MRPL27 PE=1 SV=1	2	0.214932	0.498878	16.3808	13.4888	17.0441	15.2892	14.6349	15.8037	15.9451	15.4103
	Q13488	VPP3_HUMAN V-type proton ATPase 116 kDa subunit a isoform 3 OS=Homo sapiens OX=9606 GN=TCIRG1 PE=1 SV=3	3	0.215077	0.659688	15.547	14.9224	14.9612	15.2728	15.6177	15.1412	15.1376	13.5266
	P68133	ACTS_HUMAN Actin, alpha skeletal muscle OS=Homo sapiens OX=9606 GN=ACTA1 PE=1 SV=1;sp	2	0.215115	1.21926	24.9529	25.7613	25.0684	25.2044	24.7081	25.2128	25.2364	24.9313
	P30419	NMT1_HUMAN Glycylpeptide N-tetradecanoyltransferase 1 OS=Homo sapiens OX=9606 GN=NMT1 PE=1 SV=2	9	0.215988	1.1408	18.8294	19.0743	19.2162	19.0383	18.8211	18.9267	18.6198	19.2074
	Q7KZ85	SPT6H_HUMAN Transcription elongation factor SPT6 OS=Homo sapiens OX=9606 GN=SUPT6H PE=1 SV=2	13	0.21637	0.702879	17.1089	16.3238	15.6955	15.6523	16.4448	15.4161	15.9247	15.7472
	Q9Y5P4	CERT_HUMAN Ceramide transfer protein OS=Homo sapiens OX=9606 GN=CERT1 PE=1 SV=1	7	0.216449	0.469111	16.9304	13.7415	13.3285	14.6793	15.7492	14.3833	15.827	14.6631
	O43399	TPD54_HUMAN Tumor protein D54 OS=Homo sapiens OX=9606 GN=TPD52L2 PE=1 SV=2	8	0.216751	0.880797	18.6054	18.3687	18.2377	18.406	18.8809	18.3995	18.5366	18.3539
	Q9BX68	HINT2_HUMAN Histidine triad nucleotide-binding protein 2, mitochondrial OS=Homo sapiens OX=9606 GN=HINT2 PE=1 SV=1	2	0.21688	0.743915	15.5978	15.2604	15.1586	14.8869	15.7353	14.4025	14.6053	14.8402
	O15143	ARC1B_HUMAN Actin-related protein 2/3 complex subunit 1B OS=Homo sapiens OX=9606 GN=ARPC1B PE=1 SV=3	8	0.21697	1.10662	19.7572	19.75	19.6024	19.8001	19.7914	19.7848	19.3314	19.7321
	P55011	S12A2_HUMAN Solute carrier family 12 member 2 OS=Homo sapiens OX=9606 GN=SLC12A2 PE=1 SV=1	5	0.217413	0.796348	16.2233	16.0051	16.7232	16.0179	16.3659	15.9119	15.6344	15.6977
	P60660	MYL6_HUMAN Myosin light polypeptide 6 OS=Homo sapiens OX=9606 GN=MYL6 PE=1 SV=2	5	0.217453	1.18687	20.0802	20.4038	20.7578	20.6352	20.5628	20.8469	20.2728	20.7762
	P52888	THOP1_HUMAN Thimet oligopeptidase OS=Homo sapiens OX=9606 GN=THOP1 PE=1 SV=2	7	0.218122	0.80365	17.8253	16.989	17.4378	17.4652	17.1751	17.3951	17.3528	16.6802
	O75381	PEX14_HUMAN Peroxisomal membrane protein PEX14 OS=Homo sapiens OX=9606 GN=PEX14 PE=1 SV=1	3	0.218228	1.69053	15.5081	16.17	16.6386	16.1958	16.0979	16.5806	14.1211	16.4492
	O15067	PUR4_HUMAN Phosphoribosylformylglycinamidine synthase OS=Homo sapiens OX=9606 GN=PFAS PE=1 SV=4	19	0.219235	0.84751	16.4985	16.3812	16.6826	16.6619	17.1623	16.7735	17.0308	16.6028
	P62191	PRS4_HUMAN 26S proteasome regulatory subunit 4 OS=Homo sapiens OX=9606 GN=PSMC1 PE=1 SV=1	14	0.219512	0.893643	19.2138	19.2629	19.0921	18.9769	19.4723	18.9417	19.0635	19.0112
	O96005	CLPT1_HUMAN Cleft lip and palate transmembrane protein 1 OS=Homo sapiens OX=9606 GN=CLPTM1 PE=1 SV=1	4	0.219566	0.441247	16.6937	13.2911	16.6749	16.2139	17.6449	15.938	15.1821	16.0312
	Q16643	DREB_HUMAN Drebrin OS=Homo sapiens OX=9606 GN=DBN1 PE=1 SV=4	10	0.21957	0.855636	18.4163	17.6814	17.6581	17.7814	18.0725	17.9154	18.0181	17.8871
	Q9NVA2	SEP11_HUMAN Septin-11 OS=Homo sapiens OX=9606 GN=SEPTIN11 PE=1 SV=3	8	0.219573	1.17168	18.7889	19.1939	18.9397	19.4093	19.4245	19.4444	19.3678	19.3876
	Q9HCC0	MCCB_HUMAN Methylcrotonoyl-CoA carboxylase beta chain, mitochondrial OS=Homo sapiens OX=9606 GN=MCCC2 PE=1 SV=1	8	0.219643	0.783989	17.5333	16.6917	16.6176	16.4707	16.796	16.4882	16.4146	16.3065
	Q7L576	CYFP1_HUMAN Cytoplasmic FMR1-interacting protein 1 OS=Homo sapiens OX=9606 GN=CYFIP1 PE=1 SV=1	6	0.219799	0.912629	16.6607	16.3913	16.5883	16.233	16.5446	16.4907	16.302	16.4529
	O75436	VP26A_HUMAN Vacuolar protein sorting-associated protein 26A OS=Homo sapiens OX=9606 GN=VPS26A PE=1 SV=2	7	0.219969	1.33213	17.8478	17.8659	18.5832	18.3663	17.9204	18.6276	17.3584	18.505
	P31939	PUR9_HUMAN Bifunctional purine biosynthesis protein PURH OS=Homo sapiens OX=9606 GN=ATIC PE=1 SV=3	15	0.220085	1.1193	18.4649	18.7433	18.72	18.6787	18.3506	18.7553	18.8434	18.8519
	Q86VP6	CAND1_HUMAN Cullin-associated NEDD8-dissociated protein 1 OS=Homo sapiens OX=9606 GN=CAND1 PE=1 SV=2	21	0.220562	1.14077	18.5479	18.846	18.3536	18.5759	18.1275	18.4748	18.625	18.5173
	Q99623	PHB2_HUMAN Prohibitin-2 OS=Homo sapiens OX=9606 GN=PHB2 PE=1 SV=2	10	0.220972	0.914655	19.4805	19.6649	19.4946	19.4217	19.7269	19.388	19.611	19.3236
	Q96HY6	DDRGK_HUMAN DDRGK domain-containing protein 1 OS=Homo sapiens OX=9606 GN=DDRGK1 PE=1 SV=2	5	0.221839	1.5932	17.5201	17.0704	16.7056	17.3006	15.1871	16.9373	16.2371	17.0292
	Q96P70	IPO9_HUMAN Importin-9 OS=Homo sapiens OX=9606 GN=IPO9 PE=1 SV=3	11	0.222312	1.54779	17.0822	18.3946	18.6719	17.9821	17.1647	18.7227	18.4853	18.8255
	Q16222	UAP1_HUMAN UDP-N-acetylhexosamine pyrophosphorylase OS=Homo sapiens OX=9606 GN=UAP1 PE=1 SV=3	11	0.222539	0.889155	18.3919	17.967	18.405	18.1678	17.9077	18.123	18.2522	18.021
	P23396	RS3_HUMAN 40S ribosomal protein S3 OS=Homo sapiens OX=9606 GN=RPS3 PE=1 SV=2	9	0.222997	0.851677	20.0258	19.5089	20.2598	19.5926	19.9228	19.8123	19.6663	20.0344
	P49720	PSB3_HUMAN Proteasome subunit beta type-3 OS=Homo sapiens OX=9606 GN=PSMB3 PE=1 SV=2	5	0.22314	3.09219	17.8369	19.0682	18.6947	18.9854	13.7778	18.7489	18.8971	18.9184
	P0DP25	CALM3_HUMAN Calmodulin-3 OS=Homo sapiens OX=9606 GN=CALM3 PE=1 SV=1;sp	9	0.225845	1.11832	21.3009	21.2599	21.0162	21.4568	21.4826	21.341	21.046	21.4333
	Q9H773	DCTP1_HUMAN dCTP pyrophosphatase 1 OS=Homo sapiens OX=9606 GN=DCTPP1 PE=1 SV=1	5	0.226311	0.553142	15.0947	15.8111	15.3181	14.7493	16.5065	15.52	15.9391	13.3608
	P31943	HNRH1_HUMAN Heterogeneous nuclear ribonucleoprotein H OS=Homo sapiens OX=9606 GN=HNRNPH1 PE=1 SV=4	4	0.226375	1.17256	20.4056	20.2414	20.4173	20.6826	19.8652	20.3327	20.0047	20.3548
	Q15428	SF3A2_HUMAN Splicing factor 3A subunit 2 OS=Homo sapiens OX=9606 GN=SF3A2 PE=1 SV=2	5	0.22651	1.27576	18.3199	17.6128	17.4618	18.138	17.3721	18.0512	17.439	18.1962
	Q14157	UBP2L_HUMAN Ubiquitin-associated protein 2-like OS=Homo sapiens OX=9606 GN=UBAP2L PE=1 SV=2	11	0.226578	0.904536	17.5417	17.1235	17.2582	17.3221	17.6198	17.3452	17.2571	17.307
	Q9Y376	CAB39_HUMAN Calcium-binding protein 39 OS=Homo sapiens OX=9606 GN=CAB39 PE=1 SV=1	4	0.226587	0.851108	17.2065	17.1843	16.7232	16.7487	17.0583	16.734	17.1671	16.5578
	P48059	LIMS1_HUMAN LIM and senescent cell antigen-like-containing domain protein 1 OS=Homo sapiens OX=9606 GN=LIMS1 PE=1 SV=4	7	0.226613	0.666	15.551	15.4629	16.2271	15.0431	17.0082	16.3292	16.6002	16.2057
	P04792	HSPB1_HUMAN Heat shock protein beta-1 OS=Homo sapiens OX=9606 GN=HSPB1 PE=1 SV=2	10	0.226754	1.28654	20.7745	21.838	21.6778	21.6561	21.2553	21.8344	22.0032	21.8362
	Q13637	RAB32_HUMAN Ras-related protein Rab-32 OS=Homo sapiens OX=9606 GN=RAB32 PE=1 SV=3	6	0.226927	0.779462	17.1347	16.2735	16.6234	16.2052	16.9882	16.3492	15.9585	16.4391
	Q9BRX2	PELO_HUMAN Protein pelota homolog OS=Homo sapiens OX=9606 GN=PELO PE=1 SV=2	7	0.227231	0.568725	14.9046	13.8501	16.6822	15.0914	16.3773	15.5646	15.7833	15.9846
	Q5VU43	MYOME_HUMAN Myomegalin OS=Homo sapiens OX=9606 GN=PDE4DIP PE=1 SV=3	2	0.227407	0.783471	15.1009	14.5542	14.4798	14.3452	14.7187	14.4396	14.1986	13.7509
	Q8NC60	NOA1_HUMAN Nitric oxide-associated protein 1 OS=Homo sapiens OX=9606 GN=NOA1 PE=1 SV=2	2	0.227564	1.27859	14.4783	14.6396	13.3654	14.4123	14.2162	14.1553	14.2308	14.5017
	Q9Y4I1	MYO5A_HUMAN Unconventional myosin-Va OS=Homo sapiens OX=9606 GN=MYO5A PE=1 SV=2	5	0.2276	0.608397	14.4742	15.6771	16.6465	15.2783	16.2645	14.5463	15.8581	14.874
	Q13162	PRDX4_HUMAN Peroxiredoxin-4 OS=Homo sapiens OX=9606 GN=PRDX4 PE=1 SV=1	11	0.228437	0.854078	20.3445	20.1751	19.9502	19.7604	20.2234	19.7493	19.7768	19.6998
	Q9UHQ9	NB5R1_HUMAN NADH-cytochrome b5 reductase 1 OS=Homo sapiens OX=9606 GN=CYB5R1 PE=1 SV=1	4	0.229274	1.60621	15.7773	17.8394	17.9305	17.9476	17.0198	17.6932	17.9149	17.8969
	O43390	HNRPR_HUMAN Heterogeneous nuclear ribonucleoprotein R OS=Homo sapiens OX=9606 GN=HNRNPR PE=1 SV=1	17	0.230621	0.791594	19.6728	19.2747	18.8751	19.1903	19.9549	19.036	19.2367	18.8897
	Q9NZM1	MYOF_HUMAN Myoferlin OS=Homo sapiens OX=9606 GN=MYOF PE=1 SV=1	60	0.230736	1.11507	18.9622	18.7926	18.5994	18.7556	18.4454	18.7452	18.5116	18.8539
	P13473	LAMP2_HUMAN Lysosome-associated membrane glycoprotein 2 OS=Homo sapiens OX=9606 GN=LAMP2 PE=1 SV=2	2	0.230971	0.62221	16.2934	16.2605	15.9566	14.7844	17.1659	16.1196	17.17	16.6833
	P08708	RS17_HUMAN 40S ribosomal protein S17 OS=Homo sapiens OX=9606 GN=RPS17 PE=1 SV=2	6	0.231404	0.534399	15.9589	17.2381	17.0001	16.6625	18.7153	16.0022	18.3012	16.4566
	P48735	IDHP_HUMAN Isocitrate dehydrogenase [NADP], mitochondrial OS=Homo sapiens OX=9606 GN=IDH2 PE=1 SV=2	7	0.231522	1.17769	17.7369	18.2537	17.9275	18.049	17.4188	17.9422	18.193	17.9751
	O15118	NPC1_HUMAN NPC intracellular cholesterol transporter 1 OS=Homo sapiens OX=9606 GN=NPC1 PE=1 SV=2	6	0.231651	0.75162	16.6102	16.1037	15.6495	15.9552	16.516	15.6539	15.8176	15.2328
	Q99567	NUP88_HUMAN Nuclear pore complex protein Nup88 OS=Homo sapiens OX=9606 GN=NUP88 PE=1 SV=2	5	0.231699	0.674423	16.6196	15.5337	15.0758	15.6082	17.0304	15.6097	15.969	15.67
	O43670	ZN207_HUMAN BUB3-interacting and GLEBS motif-containing protein ZNF207 OS=Homo sapiens OX=9606 GN=ZNF207 PE=1 SV=1	2	0.231745	2.73682	13.0713	14.1604	16.9758	17.4435	14.4713	16.6986	14.93	16.9559
	Q3YEC7	RABL6_HUMAN Rab-like protein 6 OS=Homo sapiens OX=9606 GN=RABL6 PE=1 SV=2	2	0.231903	0.660888	15.6959	14.1681	15.5235	15.2251	16.4961	15.4855	14.8591	15.3058
	Q9NY33	DPP3_HUMAN Dipeptidyl peptidase 3 OS=Homo sapiens OX=9606 GN=DPP3 PE=1 SV=2	9	0.232298	1.13328	18.3968	18.7023	18.8443	18.7583	18.325	18.5794	18.6471	18.895
	Q15121	PEA15_HUMAN Astrocytic phosphoprotein PEA-15 OS=Homo sapiens OX=9606 GN=PEA15 PE=1 SV=2	6	0.232488	0.885321	19.6735	19.5278	19.3111	19.4297	19.4963	19.1892	19.424	19.0553
	O14672	ADA10_HUMAN Disintegrin and metalloproteinase domain-containing protein 10 OS=Homo sapiens OX=9606 GN=ADAM10 PE=1 SV=1	7	0.233082	0.536921	16.3854	14.9337	14.8965	15.4915	17.8049	15.2948	15.182	14.96
	P21399	ACOC_HUMAN Cytoplasmic aconitate hydratase OS=Homo sapiens OX=9606 GN=ACO1 PE=1 SV=3	11	0.233514	1.22023	16.5018	16.3428	16.6839	16.5476	15.8624	16.8468	16.4045	16.864
	Q01968	OCRL_HUMAN Inositol polyphosphate 5-phosphatase OCRL OS=Homo sapiens OX=9606 GN=OCRL PE=1 SV=3	3	0.233553	1.47824	15.6017	15.7762	14.7612	15.6809	15.1913	15.205	13.827	14.9747
	P08621	RU17_HUMAN U1 small nuclear ribonucleoprotein 70 kDa OS=Homo sapiens OX=9606 GN=SNRNP70 PE=1 SV=2	10	0.233834	0.781741	18.8679	18.0336	17.801	18.3753	18.8397	18.1949	18.7917	18.2755
	P19338	NUCL_HUMAN Nucleolin OS=Homo sapiens OX=9606 GN=NCL PE=1 SV=3	15	0.234276	1.20265	19.6347	19.8234	18.9334	19.6286	19.6499	19.3411	19.2428	19.7326
	Q96A65	EXOC4_HUMAN Exocyst complex component 4 OS=Homo sapiens OX=9606 GN=EXOC4 PE=1 SV=1	14	0.234401	0.870875	16.8132	16.6391	16.6955	16.7014	16.4844	16.3918	16.6471	16.11
	Q7Z6M1	RABEK_HUMAN Rab9 effector protein with kelch motifs OS=Homo sapiens OX=9606 GN=RABEPK PE=1 SV=1	3	0.234438	0.66479	15.621	13.779	14.5157	13.5084	14.4192	14.3547	13.6863	14.244
	P52594	AGFG1_HUMAN Arf-GAP domain and FG repeat-containing protein 1 OS=Homo sapiens OX=9606 GN=AGFG1 PE=1 SV=2	3	0.234564	0.599365	14.5496	14.5418	14.7806	13.866	16.1697	13.4747	13.7703	14.4337
	P45954	ACDSB_HUMAN Short/branched chain specific acyl-CoA dehydrogenase, mitochondrial OS=Homo sapiens OX=9606 GN=ACADSB PE=1 SV=1	3	0.234867	0.58826	14.8405	15.2727	15.0928	14.8	16.0283	14.3401	14.5427	13.0296
	Q9NQ48	LZTL1_HUMAN Leucine zipper transcription factor-like protein 1 OS=Homo sapiens OX=9606 GN=LZTFL1 PE=1 SV=1	3	0.235336	0.689111	16.2467	14.9619	15.0153	15.0475	16.1845	15.284	14.7346	14.739
	Q9UM54	MYO6_HUMAN Unconventional myosin-VI OS=Homo sapiens OX=9606 GN=MYO6 PE=1 SV=4	14	0.235571	1.51647	16.6519	16.4123	16.1843	16.901	16.4747	16.5334	14.7048	16.5719
	O75306	NDUS2_HUMAN NADH dehydrogenase [ubiquinone] iron-sulfur protein 2, mitochondrial OS=Homo sapiens OX=9606 GN=NDUFS2 PE=1 SV=2	8	0.236229	0.724889	16.9799	16.5442	17.8013	16.9833	16.9985	17.2874	18.2043	17.3126
	P61026	RAB10_HUMAN Ras-related protein Rab-10 OS=Homo sapiens OX=9606 GN=RAB10 PE=1 SV=1	5	0.236285	0.825608	18.9801	18.4353	18.8115	18.672	18.6537	18.74	19.4791	18.9711
	O75821	EIF3G_HUMAN Eukaryotic translation initiation factor 3 subunit G OS=Homo sapiens OX=9606 GN=EIF3G PE=1 SV=2	9	0.236811	0.712955	18.7481	17.5878	17.3846	17.3995	18.7215	17.6512	17.9235	18.1867
	Q15056	IF4H_HUMAN Eukaryotic translation initiation factor 4H OS=Homo sapiens OX=9606 GN=EIF4H PE=1 SV=5	3	0.236819	2.16219	18.5716	18.9654	19.3335	18.9089	15.4505	19.1337	18.16	18.9575
	O00193	SMAP_HUMAN Small acidic protein OS=Homo sapiens OX=9606 GN=SMAP PE=1 SV=1	2	0.236965	0.433189	18.3363	13.9017	17.3096	17.3983	18.0029	17.5734	17.3879	17.3356
	Q00796	DHSO_HUMAN Sorbitol dehydrogenase OS=Homo sapiens OX=9606 GN=SORD PE=1 SV=4	7	0.237518	1.42655	16.0804	17.3081	17.4402	17.3047	17.5449	17.3717	16.2105	17.3417
	Q9UKM9	RALY_HUMAN RNA-binding protein Raly OS=Homo sapiens OX=9606 GN=RALY PE=1 SV=1	5	0.237707	2.57567	16.9756	16.6929	16.4085	16.9799	16.8965	17.4024	12.6807	17.3459
	Q15813	TBCE_HUMAN Tubulin-specific chaperone E OS=Homo sapiens OX=9606 GN=TBCE PE=1 SV=1	6	0.237856	1.82735	15.2604	15.5965	16.4482	15.9189	15.0361	16.2428	13.2998	15.7653
	Q9UBM7	DHCR7_HUMAN 7-dehydrocholesterol reductase OS=Homo sapiens OX=9606 GN=DHCR7 PE=1 SV=1	2	0.237971	1.9927	17.5538	17.8535	17.9936	17.6609	14.6412	17.9075	17.2615	18.007
	Q9NYF8	BCLF1_HUMAN Bcl-2-associated transcription factor 1 OS=Homo sapiens OX=9606 GN=BCLAF1 PE=1 SV=2	12	0.238175	1.20879	18.0585	17.772	17.5137	18.2184	18.0579	17.8939	17.439	18.279
	Q9Y2X3	NOP58_HUMAN Nucleolar protein 58 OS=Homo sapiens OX=9606 GN=NOP58 PE=1 SV=1	18	0.238468	1.24123	16.9588	18.0415	17.7181	17.8892	18.0541	17.778	17.705	17.9743
	P25786	PSA1_HUMAN Proteasome subunit alpha type-1 OS=Homo sapiens OX=9606 GN=PSMA1 PE=1 SV=1	10	0.23866	1.15261	19.0264	19.0018	18.5498	18.9634	18.4291	18.844	18.5988	18.6146
	O95163	ELP1_HUMAN Elongator complex protein 1 OS=Homo sapiens OX=9606 GN=ELP1 PE=1 SV=3	5	0.238733	0.654576	15.4232	14.0407	14.5734	14.7901	15.4887	14.0054	13.7003	13.9039
	Q8IWB7	WDFY1_HUMAN WD repeat and FYVE domain-containing protein 1 OS=Homo sapiens OX=9606 GN=WDFY1 PE=1 SV=1	4	0.240272	0.574325	16.9345	15.2566	15.9436	14.6979	14.2647	14.1555	15.3601	15.1926
	P84098	RL19_HUMAN 60S ribosomal protein L19 OS=Homo sapiens OX=9606 GN=RPL19 PE=1 SV=1	4	0.240379	2.06871	19.7629	20.9703	21.2252	20.6986	17.5371	20.7591	20.5631	20.8553
	P78356	PI42B_HUMAN Phosphatidylinositol 5-phosphate 4-kinase type-2 beta OS=Homo sapiens OX=9606 GN=PIP4K2B PE=1 SV=1	4	0.240562	0.825904	16.8263	16.5814	16.9011	16.9388	16.9332	16.7341	16.685	15.9874
	P28838	AMPL_HUMAN Cytosol aminopeptidase OS=Homo sapiens OX=9606 GN=LAP3 PE=1 SV=3	15	0.240807	0.849699	18.2535	18.053	17.9112	17.8226	18.1393	18.1241	18.7087	18.0729
	P62263	RS14_HUMAN 40S ribosomal protein S14 OS=Homo sapiens OX=9606 GN=RPS14 PE=1 SV=3	7	0.242404	0.850381	19.5918	19.6875	20.019	19.8263	19.5979	19.419	20.2262	19.5669
	Q53G44	IF44L_HUMAN Interferon-induced protein 44-like OS=Homo sapiens OX=9606 GN=IFI44L PE=2 SV=3	3	0.24329	1.95333	14.8287	15.8273	13.715	16.0079	14.6474	16.0956	14.0598	13.1838
	P12270	TPR_HUMAN Nucleoprotein TPR OS=Homo sapiens OX=9606 GN=TPR PE=1 SV=3	30	0.243588	1.20725	17.2102	17.2374	17.5818	17.4003	16.6224	17.5763	17.1819	17.4692
	Q9NWV8	BABA1_HUMAN BRISC and BRCA1-A complex member 1 OS=Homo sapiens OX=9606 GN=BABAM1 PE=1 SV=1	2	0.243671	0.46254	18.666	15.7715	14.6762	15.7951	17.1043	15.3723	16.0338	15.092
	Q15020	SART3_HUMAN Squamous cell carcinoma antigen recognized by T-cells 3 OS=Homo sapiens OX=9606 GN=SART3 PE=1 SV=1	9	0.243779	0.700067	17.6634	16.6051	16.7579	16.1314	16.7815	16.3834	15.8664	15.8914
	Q16740	CLPP_HUMAN ATP-dependent Clp protease proteolytic subunit, mitochondrial OS=Homo sapiens OX=9606 GN=CLPP PE=1 SV=1	4	0.244397	2.02665	16.7362	17.4747	17.2836	16.9139	13.9138	17.3472	16.9914	17.2655
	Q8N3V7	SYNPO_HUMAN Synaptopodin OS=Homo sapiens OX=9606 GN=SYNPO PE=1 SV=2	4	0.244576	0.671944	16.6643	15.9618	16.0789	14.3694	15.8194	15.8153	15.4334	15.5551
	Q96HC4	PDLI5_HUMAN PDZ and LIM domain protein 5 OS=Homo sapiens OX=9606 GN=PDLIM5 PE=1 SV=5	10	0.244702	1.12395	17.2858	17.294	17.4575	17.7566	17.3841	17.7523	17.6297	17.6285
	Q8IZL8	PELP1_HUMAN Proline-, glutamic acid- and leucine-rich protein 1 OS=Homo sapiens OX=9606 GN=PELP1 PE=1 SV=2	9	0.24519	1.52765	15.0969	16.1958	16.9079	17.3227	16.6191	17.1952	16.4336	16.7892
	Q9NZU5	LMCD1_HUMAN LIM and cysteine-rich domains protein 1 OS=Homo sapiens OX=9606 GN=LMCD1 PE=1 SV=1	5	0.245338	0.579151	16.8481	13.9052	16.6115	16.0387	16.1896	16.4574	16.0155	16.1113
	O75323	NIPS2_HUMAN Protein NipSnap homolog 2 OS=Homo sapiens OX=9606 GN=NIPSNAP2 PE=1 SV=1	5	0.245942	0.806254	17.8263	17.1552	17.491	17.2344	17.7732	17.3806	16.8554	16.933
	Q9UPN7	PP6R1_HUMAN Serine/threonine-protein phosphatase 6 regulatory subunit 1 OS=Homo sapiens OX=9606 GN=PPP6R1 PE=1 SV=5	5	0.246239	0.398055	17.588	13.9501	13.9603	13.984	16.6004	13.8814	13.294	14.3114
	P61758	PFD3_HUMAN Prefoldin subunit 3 OS=Homo sapiens OX=9606 GN=VBP1 PE=1 SV=4	5	0.246443	1.42873	17.1621	17.0778	17.3262	17.4353	15.9335	17.6451	17.5572	17.8799
	Q9BXV9	GON7_HUMAN EKC/KEOPS complex subunit GON7 OS=Homo sapiens OX=9606 GN=GON7 PE=1 SV=2	2	0.246476	0.602282	17.1145	15.9531	15.7111	16.0607	16.4218	15.7675	15.6073	14.1475
	Q9P0V9	SEP10_HUMAN Septin-10 OS=Homo sapiens OX=9606 GN=SEPTIN10 PE=1 SV=2	3	0.246816	0.617806	15.7699	13.045	14.8868	14.5438	14.5687	14.2516	13.7223	14.3282
	Q8TC12	RDH11_HUMAN Retinol dehydrogenase 11 OS=Homo sapiens OX=9606 GN=RDH11 PE=1 SV=2	4	0.246889	3.78528	14.0018	18.2372	17.6613	13.3094	13.7767	17.7048	14.2297	18.0999
	O15344	TRI18_HUMAN E3 ubiquitin-protein ligase Midline-1 OS=Homo sapiens OX=9606 GN=MID1 PE=1 SV=1	3	0.248102	1.26919	14.2097	15.2669	15.3534	15.4892	15.1584	15.3132	14.9894	15.0172
	P04424	ARLY_HUMAN Argininosuccinate lyase OS=Homo sapiens OX=9606 GN=ASL PE=1 SV=4	5	0.248251	1.26745	17.2002	17.6552	16.7435	17.2874	16.5	17.048	17.5598	17.3806
	O75494	SRS10_HUMAN Serine/arginine-rich splicing factor 10 OS=Homo sapiens OX=9606 GN=SRSF10 PE=1 SV=1	3	0.248349	1.84373	15.5259	16.5943	16.236	16.1253	13.6209	16.4406	16.7363	16.4894
	P14625	ENPL_HUMAN Endoplasmin OS=Homo sapiens OX=9606 GN=HSP90B1 PE=1 SV=1	35	0.24863	1.07638	20.6817	20.9042	20.7145	20.7303	20.8529	20.7067	20.5215	20.8541
	Q9H993	ARMT1_HUMAN Damage-control phosphatase ARMT1 OS=Homo sapiens OX=9606 GN=ARMT1 PE=1 SV=1	4	0.249049	0.513949	17.5006	16.7264	16.4025	16.6749	17.9449	16.3124	15.9438	14.2368
	Q08257	QOR_HUMAN Quinone oxidoreductase OS=Homo sapiens OX=9606 GN=CRYZ PE=1 SV=1	7	0.249303	1.99582	14.3419	17.0509	17.2944	17.1592	16.2624	17.863	17.7616	17.575
	Q9H501	ESF1_HUMAN ESF1 homolog OS=Homo sapiens OX=9606 GN=ESF1 PE=1 SV=1	3	0.250102	0.822671	14.8636	14.3985	14.3996	14.6368	15.363	14.4398	14.8077	14.8323
	Q8IVM0	CCD50_HUMAN Coiled-coil domain-containing protein 50 OS=Homo sapiens OX=9606 GN=CCDC50 PE=1 SV=1	3	0.250105	0.563022	15.7101	14.657	13.8393	13.8342	15.4981	13.4949	13.4628	13.2093
	Q13409	DC1I2_HUMAN Cytoplasmic dynein 1 intermediate chain 2 OS=Homo sapiens OX=9606 GN=DYNC1I2 PE=1 SV=3	11	0.250107	0.807567	19.5201	19.3038	18.855	18.9714	19.5396	18.7724	18.9321	18.5659
	P41091	IF2G_HUMAN Eukaryotic translation initiation factor 2 subunit 3 OS=Homo sapiens OX=9606 GN=EIF2S3 PE=1 SV=3;sp	10	0.250781	0.906273	19.3214	18.9536	19.0039	18.7543	18.9851	18.9299	18.8423	18.947
	Q96FV9	THOC1_HUMAN THO complex subunit 1 OS=Homo sapiens OX=9606 GN=THOC1 PE=1 SV=1	3	0.251056	1.38134	14.7543	15.6481	14.4613	14.9907	15.2761	14.7577	13.8252	14.7847
	Q12768	WASC5_HUMAN WASH complex subunit 5 OS=Homo sapiens OX=9606 GN=WASHC5 PE=1 SV=1	7	0.251062	0.721258	16.8109	16.2201	15.7674	15.83	16.9236	15.3486	15.7329	15.9505
	P62280	RS11_HUMAN 40S ribosomal protein S11 OS=Homo sapiens OX=9606 GN=RPS11 PE=1 SV=3	7	0.251448	0.776157	17.7493	18.1488	17.784	17.7016	18.7929	17.8721	18.2977	17.4391
	Q14764	MVP_HUMAN Major vault protein OS=Homo sapiens OX=9606 GN=MVP PE=1 SV=4	17	0.252266	1.14406	18.2664	18.7983	18.7329	18.5627	18.1398	18.6506	18.6137	18.5179
	Q16576	RBBP7_HUMAN Histone-binding protein RBBP7 OS=Homo sapiens OX=9606 GN=RBBP7 PE=1 SV=1	9	0.25295	0.851706	19.8616	19.5302	19.329	19.8164	19.8801	19.4207	19.8329	19.21
	Q96KG9	SCYL1_HUMAN N-terminal kinase-like protein OS=Homo sapiens OX=9606 GN=SCYL1 PE=1 SV=1	8	0.253105	0.728216	16.6342	16.2834	15.6585	15.8784	16.406	15.3206	15.7219	15.108
	P62341	SELT_HUMAN Thioredoxin reductase-like selenoprotein T OS=Homo sapiens OX=9606 GN=SELENOT PE=1 SV=2	2	0.253466	0.69315	14.6851	13.5338	15.2475	14.63	15.4439	14.3731	14.5333	15.2578
	P49902	5NTC_HUMAN Cytosolic purine 5-nucleotidase OS=Homo sapiens OX=9606 GN=NT5C2 PE=1 SV=1	13	0.254294	1.28674	17.753	17.3887	16.9077	18.1658	17.8363	17.7028	17.0299	17.7245
	O75150	BRE1B_HUMAN E3 ubiquitin-protein ligase BRE1B OS=Homo sapiens OX=9606 GN=RNF40 PE=1 SV=5	2	0.25479	0.676197	15.8363	14.4706	15.2779	14.6772	13.9064	14.8006	15.1302	13.9445
	Q01970	PLCB3_HUMAN 1-phosphatidylinositol 4,5-bisphosphate phosphodiesterase beta-3 OS=Homo sapiens OX=9606 GN=PLCB3 PE=1 SV=2	4	0.255463	0.557968	15.933	15.2647	15.2727	13.5727	13.7922	15.0162	15.7633	13.5407
	P62140	PP1B_HUMAN Serine/threonine-protein phosphatase PP1-beta catalytic subunit OS=Homo sapiens OX=9606 GN=PPP1CB PE=1 SV=3	4	0.256096	0.8205	17.4296	17.5	17.8495	17.6271	18.3208	17.7605	18.3043	17.875
	P50990	TCPQ_HUMAN T-complex protein 1 subunit theta OS=Homo sapiens OX=9606 GN=CCT8 PE=1 SV=4	23	0.256548	1.19435	18.6206	19.3662	19.5709	19.373	19.2216	19.525	19.3037	19.4774
	Q9UP83	COG5_HUMAN Conserved oligomeric Golgi complex subunit 5 OS=Homo sapiens OX=9606 GN=COG5 PE=1 SV=3	2	0.256948	0.692848	15.9129	14.5239	15.1876	14.7441	15.5496	14.6878	13.9806	14.5574
	P52815	RM12_HUMAN 39S ribosomal protein L12, mitochondrial OS=Homo sapiens OX=9606 GN=MRPL12 PE=1 SV=2	4	0.256996	0.711072	17.2942	16.7363	16.8986	16.0028	17.4144	16.7229	15.9177	16.0952
	Q02218	ODO1_HUMAN 2-oxoglutarate dehydrogenase, mitochondrial OS=Homo sapiens OX=9606 GN=OGDH PE=1 SV=3	15	0.257313	0.828688	17.8778	17.1692	17.4302	16.7782	17.2491	17.194	17.0747	17.4061
	Q99661	KIF2C_HUMAN Kinesin-like protein KIF2C OS=Homo sapiens OX=9606 GN=KIF2C PE=1 SV=2	3	0.257911	0.643805	16.2642	13.8143	15.6158	15.566	15.6278	15.3049	14.6595	14.941
	P41252	SYIC_HUMAN Isoleucine--tRNA ligase, cytoplasmic OS=Homo sapiens OX=9606 GN=IARS1 PE=1 SV=2	22	0.257974	0.871738	18.2754	18.2072	17.9652	18.1628	18.6429	17.9576	18.1677	17.9315
	Q13769	THOC5_HUMAN THO complex subunit 5 homolog OS=Homo sapiens OX=9606 GN=THOC5 PE=1 SV=2	2	0.258234	1.32794	15.7692	15.0062	15.2507	16.3686	15.5759	15.944	15.1166	16.0304
	Q9ULC4	MCTS1_HUMAN Malignant T-cell-amplified sequence 1 OS=Homo sapiens OX=9606 GN=MCTS1 PE=1 SV=1	3	0.258393	1.23967	16.9697	16.4399	16.4584	17.1447	16.8966	16.9935	16.2593	17.2458
	Q12979	ABR_HUMAN Active breakpoint cluster region-related protein OS=Homo sapiens OX=9606 GN=ABR PE=1 SV=2	5	0.258493	0.802838	17.5832	16.5667	16.3711	16.6403	16.8915	16.711	16.84	16.5005
	O15027	SC16A_HUMAN Protein transport protein Sec16A OS=Homo sapiens OX=9606 GN=SEC16A PE=1 SV=4	4	0.25875	0.410283	16.6022	14.9257	13.9989	13.281	16.8962	13.8877	13.0354	13.2971
	P16989	YBOX3_HUMAN Y-box-binding protein 3 OS=Homo sapiens OX=9606 GN=YBX3 PE=1 SV=4	5	0.258786	1.79891	15.7007	17.8306	17.3133	18.0889	18.8493	18.4219	17.7618	18.6722
	P49588	SYAC_HUMAN Alanine--tRNA ligase, cytoplasmic OS=Homo sapiens OX=9606 GN=AARS1 PE=1 SV=2	26	0.259014	1.05401	19.2635	19.2482	19.0723	19.2872	19.1937	19.3413	19.1671	19.1236
	Q15257	PTPA_HUMAN Serine/threonine-protein phosphatase 2A activator OS=Homo sapiens OX=9606 GN=PTPA PE=1 SV=3	8	0.259017	1.18669	17.3895	17.4285	17.8595	17.7209	17.614	17.8089	17.2372	18.1297
	Q9UJU6	DBNL_HUMAN Drebrin-like protein OS=Homo sapiens OX=9606 GN=DBNL PE=1 SV=1	10	0.260549	1.21965	18.5778	18.7434	18.7981	18.814	17.8726	18.9452	18.8543	18.7461
	Q9NW15	ANO10_HUMAN Anoctamin-10 OS=Homo sapiens OX=9606 GN=ANO10 PE=1 SV=2	3	0.26057	1.65779	16.7427	15.9906	16.6492	16.7204	15.095	16.5106	14.494	16.6763
	Q9UNP9	PPIE_HUMAN Peptidyl-prolyl cis-trans isomerase E OS=Homo sapiens OX=9606 GN=PPIE PE=1 SV=1	4	0.260782	0.651636	15.4668	14.9822	14.9624	15.5206	15.4572	13.6199	14.5889	13.8812
	P42766	RL35_HUMAN 60S ribosomal protein L35 OS=Homo sapiens OX=9606 GN=RPL35 PE=1 SV=2	3	0.26081	1.3336	17.1277	17.5056	17.0138	17.5467	17.569	17.1072	16.0574	17.2697
	P49750	YLPM1_HUMAN YLP motif-containing protein 1 OS=Homo sapiens OX=9606 GN=YLPM1 PE=1 SV=4	5	0.260963	0.710112	14.9081	13.3371	15.0809	14.0591	13.7214	14.4475	14.0952	13.9864
	P09972	ALDOC_HUMAN Fructose-bisphosphate aldolase C OS=Homo sapiens OX=9606 GN=ALDOC PE=1 SV=2	1	0.26194	1.26473	21.219	21.5099	21.3392	21.2334	20.2632	21.1388	20.6781	20.9727
	Q96KA5	CLP1L_HUMAN Cleft lip and palate transmembrane protein 1-like protein OS=Homo sapiens OX=9606 GN=CLPTM1L PE=1 SV=1	3	0.261992	1.39239	15.794	16.9799	16.7902	16.5558	15.4422	16.7755	16.972	16.5974
	P48449	ERG7_HUMAN Lanosterol synthase OS=Homo sapiens OX=9606 GN=LSS PE=1 SV=1	7	0.262092	2.1448	17.5422	17.5321	14.7108	17.0649	17.1114	16.5878	14.0693	16.6523
	Q9UHI6	DDX20_HUMAN Probable ATP-dependent RNA helicase DDX20 OS=Homo sapiens OX=9606 GN=DDX20 PE=1 SV=2	3	0.262426	0.691232	13.0825	13.9144	14.4241	14.0052	14.607	13.2731	14.1091	12.8991
	Q9Y2B0	CNPY2_HUMAN Protein canopy homolog 2 OS=Homo sapiens OX=9606 GN=CNPY2 PE=1 SV=1	6	0.26278	0.827291	17.9293	16.828	17.3939	17.1504	17.2092	17.3297	17.4582	17.5884
	O60493	SNX3_HUMAN Sorting nexin-3 OS=Homo sapiens OX=9606 GN=SNX3 PE=1 SV=3	5	0.263079	0.398745	17.4432	13.1436	15.5401	16.4165	16.1014	14.0462	13.5878	13.7603
	P61956	SUMO2_HUMAN Small ubiquitin-related modifier 2 OS=Homo sapiens OX=9606 GN=SUMO2 PE=1 SV=3;sp	2	0.263407	1.83151	15.6045	17.8763	18.0699	18.5712	17.7787	18.6533	18.7708	18.6152
	Q9NR45	SIAS_HUMAN Sialic acid synthase OS=Homo sapiens OX=9606 GN=NANS PE=1 SV=2	8	0.263662	1.06394	18.2648	18.4657	18.2627	18.4515	18.2618	18.3648	18.2876	18.1524
	O00566	MPP10_HUMAN U3 small nucleolar ribonucleoprotein protein MPP10 OS=Homo sapiens OX=9606 GN=MPHOSPH10 PE=1 SV=2	2	0.26467	1.59386	16.7296	16.6566	16.244	16.6524	14.288	16.4194	16.2752	16.4985
	O00273	DFFA_HUMAN DNA fragmentation factor subunit alpha OS=Homo sapiens OX=9606 GN=DFFA PE=1 SV=1	5	0.264824	1.63048	15.9594	16.4628	16.5885	16.4295	16.4771	16.4888	14.1179	16.5829
	P50402	EMD_HUMAN Emerin OS=Homo sapiens OX=9606 GN=EMD PE=1 SV=1	6	0.265194	0.812251	18.6858	18.0547	18.4584	18.1738	18.8512	18.1327	17.7507	18.1849
	P60900	PSA6_HUMAN Proteasome subunit alpha type-6 OS=Homo sapiens OX=9606 GN=PSMA6 PE=1 SV=1	7	0.266035	1.15718	19.0012	18.8984	18.9722	19.0609	18.3342	19.1631	18.9796	19.0072
	Q9HD20	AT131_HUMAN Manganese-transporting ATPase 13A1 OS=Homo sapiens OX=9606 GN=ATP13A1 PE=1 SV=2	3	0.266213	1.40005	15.6376	15.0743	14.7925	15.7419	13.9308	15.5208	15.2311	15.1969
	P41227	NAA10_HUMAN N-alpha-acetyltransferase 10 OS=Homo sapiens OX=9606 GN=NAA10 PE=1 SV=1	3	0.266597	1.32018	16.6069	16.7571	17.2549	17.6198	17.3654	17.3873	16.2195	17.2854
	P08133	ANXA6_HUMAN Annexin A6 OS=Homo sapiens OX=9606 GN=ANXA6 PE=1 SV=3	10	0.266773	1.15689	17.822	18.1872	17.6273	18.0336	17.7322	17.6109	17.4171	17.6078
	Q96EE3	SEH1_HUMAN Nucleoporin SEH1 OS=Homo sapiens OX=9606 GN=SEH1L PE=1 SV=3	6	0.266987	0.623607	15.2101	15.079	15.2925	15.1634	16.8066	14.6425	14.4051	14.1042
	P24666	PPAC_HUMAN Low molecular weight phosphotyrosine protein phosphatase OS=Homo sapiens OX=9606 GN=ACP1 PE=1 SV=3	3	0.267049	1.93389	14.7823	14.2242	16.1361	15.5929	13.145	16.4034	14.3435	15.9924
	Q9UBF2	COPG2_HUMAN Coatomer subunit gamma-2 OS=Homo sapiens OX=9606 GN=COPG2 PE=1 SV=1	12	0.267148	0.638191	17.1862	14.9154	16.4891	16.7128	17.2203	16.5322	15.7791	15.9226
	Q99584	S10AD_HUMAN Protein S100-A13 OS=Homo sapiens OX=9606 GN=S100A13 PE=1 SV=1	2	0.26741	1.4756	15.899	16.078	16.6207	16.4187	14.4559	16.2975	15.8864	16.3131
	Q8WY22	BRI3B_HUMAN BRI3-binding protein OS=Homo sapiens OX=9606 GN=BRI3BP PE=1 SV=1	2	0.267554	0.626386	14.4778	14.8595	15.9146	14.9292	15.7609	15.6675	15.5212	13.5188
	P40926	MDHM_HUMAN Malate dehydrogenase, mitochondrial OS=Homo sapiens OX=9606 GN=MDH2 PE=1 SV=3	13	0.267557	1.35219	19.7611	20.7915	20.6347	20.4309	19.7187	20.9521	21.0986	20.7796
	Q8TEX9	IPO4_HUMAN Importin-4 OS=Homo sapiens OX=9606 GN=IPO4 PE=1 SV=2	13	0.267778	1.5959	14.912	15.4758	16.9156	16.5947	15.5457	16.8066	15.934	17.1277
	Q15366	PCBP2_HUMAN Poly(rC)-binding protein 2 OS=Homo sapiens OX=9606 GN=PCBP2 PE=1 SV=1	10	0.267903	0.836593	19.4884	19.3632	19.6682	19.7811	20.374	19.5916	19.7594	19.5245
	Q969X5	ERGI1_HUMAN Endoplasmic reticulum-Golgi intermediate compartment protein 1 OS=Homo sapiens OX=9606 GN=ERGIC1 PE=1 SV=1	5	0.268002	1.20082	16.7098	16.5753	16.7616	17.1684	17.1842	17.2931	16.7244	17.3993
	P83881	RL36A_HUMAN 60S ribosomal protein L36a OS=Homo sapiens OX=9606 GN=RPL36A PE=1 SV=2;sp	4	0.26823	2.27203	14.3385	17.0129	17.7827	15.6632	15.7521	16.3808	13.7179	17.2701
	Q6P158	DHX57_HUMAN Putative ATP-dependent RNA helicase DHX57 OS=Homo sapiens OX=9606 GN=DHX57 PE=1 SV=2	5	0.268668	0.641554	13.4406	14.4639	14.6965	13.4033	15.6123	13.5996	13.9667	13.6879
	Q9BYV8	CEP41_HUMAN Centrosomal protein of 41 kDa OS=Homo sapiens OX=9606 GN=CEP41 PE=1 SV=1	3	0.2687	0.435266	19.039	15.7574	14.3066	15.4284	16.5587	15.0223	16.253	15.149
	P40925	MDHC_HUMAN Malate dehydrogenase, cytoplasmic OS=Homo sapiens OX=9606 GN=MDH1 PE=1 SV=4	8	0.269032	0.820395	19.9678	19.5066	19.3182	19.3764	20.1607	19.3436	19.2391	19.3166
	Q99436	PSB7_HUMAN Proteasome subunit beta type-7 OS=Homo sapiens OX=9606 GN=PSMB7 PE=1 SV=1	3	0.269467	3.24316	19.6139	18.9901	19.2069	19.4512	17.8972	19.4185	13.5379	19.1858
	Q92878	RAD50_HUMAN DNA repair protein RAD50 OS=Homo sapiens OX=9606 GN=RAD50 PE=1 SV=1	14	0.269822	1.4627	16.6372	16.707	16.6017	16.5318	16.6771	16.8689	14.8629	16.8658
	Q5VW32	BROX_HUMAN BRO1 domain-containing protein BROX OS=Homo sapiens OX=9606 GN=BROX PE=1 SV=1	3	0.270445	1.57461	15.121	15.6124	13.792	15.6211	14.5908	15.3894	16.328	15.8289
	Q15836	VAMP3_HUMAN Vesicle-associated membrane protein 3 OS=Homo sapiens OX=9606 GN=VAMP3 PE=1 SV=3	1	0.27073	1.36754	16.798	18.3768	18.436	17.9983	17.9652	18.3519	18.1444	18.423
	P18085	ARF4_HUMAN ADP-ribosylation factor 4 OS=Homo sapiens OX=9606 GN=ARF4 PE=1 SV=3	4	0.270855	1.142	18.9971	19.3164	18.6345	18.841	18.7988	19.0502	19.1937	19.1828
	P41226	UBA7_HUMAN Ubiquitin-like modifier-activating enzyme 7 OS=Homo sapiens OX=9606 GN=UBA7 PE=1 SV=2	4	0.271412	0.794304	14.59	14.3242	14.5788	14.7407	15.0922	13.9223	14.0893	14.0343
	Q15819	UB2V2_HUMAN Ubiquitin-conjugating enzyme E2 variant 2 OS=Homo sapiens OX=9606 GN=UBE2V2 PE=1 SV=4;sp	4	0.271494	1.16526	15.7353	15.8263	15.4888	15.5049	15.391	16.2446	15.762	15.6838
	Q9Y5A9	YTHD2_HUMAN YTH domain-containing family protein 2 OS=Homo sapiens OX=9606 GN=YTHDF2 PE=1 SV=2	4	0.271626	0.787291	16.6271	16.928	16.26	16.4107	17.2611	16.2859	16.8641	16.0077
	Q58FF6	H90B4_HUMAN Putative heat shock protein HSP 90-beta 4 OS=Homo sapiens OX=9606 GN=HSP90AB4P PE=5 SV=1	1	0.271857	2.07818	13.552	13.535	15.5357	15.8243	15.1603	16.8912	13.6829	15.9018
	Q9NPL8	TIDC1_HUMAN Complex I assembly factor TIMMDC1, mitochondrial OS=Homo sapiens OX=9606 GN=TIMMDC1 PE=1 SV=2	3	0.272535	0.624404	16.6321	14.3164	14.3311	14.0101	14.5582	14.2673	14.5821	14.7917
	O15372	EIF3H_HUMAN Eukaryotic translation initiation factor 3 subunit H OS=Homo sapiens OX=9606 GN=EIF3H PE=1 SV=1	8	0.272722	1.13123	19.0467	19.2848	19.4007	19.2279	18.9013	19.1377	18.7283	19.1382
	P36776	LONM_HUMAN Lon protease homolog, mitochondrial OS=Homo sapiens OX=9606 GN=LONP1 PE=1 SV=2	15	0.27301	1.14258	17.7112	17.2644	17.2115	17.5887	17.079	17.5686	17.2204	17.5696
	Q9HDC9	APMAP_HUMAN Adipocyte plasma membrane-associated protein OS=Homo sapiens OX=9606 GN=APMAP PE=1 SV=2	13	0.273045	1.14174	19.6873	19.8136	19.3477	19.5606	19.5429	19.5037	19.039	19.5039
	P08236	BGLR_HUMAN Beta-glucuronidase OS=Homo sapiens OX=9606 GN=GUSB PE=1 SV=2	5	0.273098	0.730491	17.2199	17.1968	16.4081	16.7437	17.1982	16.023	16.7569	15.8073
	P61981	1433G_HUMAN 14-3-3 protein gamma OS=Homo sapiens OX=9606 GN=YWHAG PE=1 SV=2	8	0.273779	1.46109	18.0338	19.6001	19.7077	19.7168	19.1246	19.9774	20.0823	19.8421
	P50579	MAP2_HUMAN Methionine aminopeptidase 2 OS=Homo sapiens OX=9606 GN=METAP2 PE=1 SV=1	13	0.273913	1.36732	19.0602	19.0518	17.4477	18.9201	18.3358	18.7951	18.9583	18.8404
	Q9UPT5	EXOC7_HUMAN Exocyst complex component 7 OS=Homo sapiens OX=9606 GN=EXOC7 PE=1 SV=3	8	0.274033	0.839747	15.875	15.9236	15.8347	15.3635	16.3226	15.9175	15.6274	15.4472
	O00505	IMA4_HUMAN Importin subunit alpha-4 OS=Homo sapiens OX=9606 GN=KPNA3 PE=1 SV=2	4	0.274317	0.47187	17.6224	17.2408	17.1436	17.1617	17.4096	17.2474	17.4447	13.6362
	P20700	LMNB1_HUMAN Lamin-B1 OS=Homo sapiens OX=9606 GN=LMNB1 PE=1 SV=2	21	0.274512	1.0686	18.5363	18.5793	18.6727	18.7057	18.647	18.784	18.7337	18.9035
	P46940	IQGA1_HUMAN Ras GTPase-activating-like protein IQGAP1 OS=Homo sapiens OX=9606 GN=IQGAP1 PE=1 SV=1	68	0.274963	1.06044	20.1927	20.5153	20.3398	20.2501	20.389	20.3509	20.2875	20.4314
	P06730	IF4E_HUMAN Eukaryotic translation initiation factor 4E OS=Homo sapiens OX=9606 GN=EIF4E PE=1 SV=2	3	0.275451	0.808636	17.262	16.6342	16.2954	16.4878	16.4446	16.3538	16.6727	15.9731
	O95159	ZFPL1_HUMAN Zinc finger protein-like 1 OS=Homo sapiens OX=9606 GN=ZFPL1 PE=1 SV=2	2	0.275486	1.23028	15.0839	15.4501	14.7587	15.4963	15.3405	14.9175	14.4427	14.958
	P35268	RL22_HUMAN 60S ribosomal protein L22 OS=Homo sapiens OX=9606 GN=RPL22 PE=1 SV=2	3	0.277183	0.870193	20.5632	20.0642	19.9033	20.1671	20.4832	19.9389	20.0528	20.03
	Q8NI36	WDR36_HUMAN WD repeat-containing protein 36 OS=Homo sapiens OX=9606 GN=WDR36 PE=1 SV=1	4	0.277204	1.28011	14.3669	14.0061	14.4353	14.9911	14.4734	14.8449	13.623	14.4815
	P00374	DYR_HUMAN Dihydrofolate reductase OS=Homo sapiens OX=9606 GN=DHFR PE=1 SV=2	3	0.27756	0.468052	16.7659	13.664	17.4754	16.0084	14.9409	16.4853	17.7437	16.3872
	Q96CT7	CC124_HUMAN Coiled-coil domain-containing protein 124 OS=Homo sapiens OX=9606 GN=CCDC124 PE=1 SV=1	2	0.278129	0.818595	16.9532	16.8344	16.4231	16.5354	17.0579	16.1458	16.3833	16.1469
	P21266	GSTM3_HUMAN Glutathione S-transferase Mu 3 OS=Homo sapiens OX=9606 GN=GSTM3 PE=1 SV=3	12	0.278179	0.752786	19.1673	18.1896	18.1687	18.3764	19.0917	17.7652	17.9717	18.4296
	Q9UIA9	XPO7_HUMAN Exportin-7 OS=Homo sapiens OX=9606 GN=XPO7 PE=1 SV=3	9	0.278442	1.86535	16.9298	16.7775	16.487	16.4907	15.6493	16.4083	13.5467	16.5341
	P08758	ANXA5_HUMAN Annexin A5 OS=Homo sapiens OX=9606 GN=ANXA5 PE=1 SV=2	18	0.278456	1.15257	20.7666	20.9731	20.5369	20.8404	20.2836	20.7735	21.0668	20.8864
	Q99496	RING2_HUMAN E3 ubiquitin-protein ligase RING2 OS=Homo sapiens OX=9606 GN=RNF2 PE=1 SV=1	2	0.278836	0.612941	15.401	14.7758	14.7104	14.1327	13.7415	13.1474	13.8595	12.8318
	P22102	PUR2_HUMAN Trifunctional purine biosynthetic protein adenosine-3 OS=Homo sapiens OX=9606 GN=GART PE=1 SV=1	19	0.279418	1.06237	18.4596	18.6242	18.3332	18.4495	18.3715	18.3634	18.2773	18.3538
	Q13740	CD166_HUMAN CD166 antigen OS=Homo sapiens OX=9606 GN=ALCAM PE=1 SV=2	13	0.279554	1.1857	18.1757	18.9693	19.1172	18.7904	18.4821	18.9671	18.7415	18.7727
	Q9Y2J2	E41L3_HUMAN Band 4.1-like protein 3 OS=Homo sapiens OX=9606 GN=EPB41L3 PE=1 SV=2	17	0.279768	0.90503	18.0599	17.635	17.7508	17.6479	17.7395	17.5421	17.4792	17.6286
	P35241	RADI_HUMAN Radixin OS=Homo sapiens OX=9606 GN=RDX PE=1 SV=1	15	0.279811	1.43349	17.0674	18.4812	18.7406	18.7175	17.9002	18.8424	18.9538	18.6989
	P04075	ALDOA_HUMAN Fructose-bisphosphate aldolase A OS=Homo sapiens OX=9606 GN=ALDOA PE=1 SV=2	16	0.279861	0.927693	21.8007	21.7326	21.6187	21.5508	21.6884	21.5294	21.527	21.3888
	P62834	RAP1A_HUMAN Ras-related protein Rap-1A OS=Homo sapiens OX=9606 GN=RAP1A PE=1 SV=1	1	0.280313	0.674819	15.8979	14.3682	16.4029	15.8733	16.664	16.3396	15.9454	16.0593
	P84157	MXRA7_HUMAN Matrix-remodeling-associated protein 7 OS=Homo sapiens OX=9606 GN=MXRA7 PE=1 SV=1	4	0.280855	0.357422	18.2124	16.7414	13.9639	15.3551	18.8361	16.4677	17.5184	14.0294
	Q9ULH1	ASAP1_HUMAN Arf-GAP with SH3 domain, ANK repeat and PH domain-containing protein 1 OS=Homo sapiens OX=9606 GN=ASAP1 PE=1 SV=4	6	0.281165	1.50054	13.9108	15.0884	13.7982	15.0004	15.8715	15.2427	14.172	14.7628
	P35914	HMGCL_HUMAN Hydroxymethylglutaryl-CoA lyase, mitochondrial OS=Homo sapiens OX=9606 GN=HMGCL PE=1 SV=2	2	0.281243	1.56651	15.6455	15.831	16.4103	15.9017	13.8294	15.9532	15.3912	16.1807
	P62906	RL10A_HUMAN 60S ribosomal protein L10a OS=Homo sapiens OX=9606 GN=RPL10A PE=1 SV=2	5	0.28125	0.839163	20.0903	19.7104	20.2482	19.8277	19.4751	19.9498	20.4275	19.7412
	P16949	STMN1_HUMAN Stathmin OS=Homo sapiens OX=9606 GN=STMN1 PE=1 SV=3	5	0.281303	0.867069	17.8982	17.6893	17.2677	17.2814	17.8547	17.3716	17.7496	17.6048
	P63279	UBC9_HUMAN SUMO-conjugating enzyme UBC9 OS=Homo sapiens OX=9606 GN=UBE2I PE=1 SV=1	4	0.281368	2.05718	16.1479	17.5977	17.7944	17.2254	14.7254	17.9332	18.4348	18.5089
	Q14258	TRI25_HUMAN E3 ubiquitin/ISG15 ligase TRIM25 OS=Homo sapiens OX=9606 GN=TRIM25 PE=1 SV=2	13	0.281785	1.08334	18.1371	18.0765	18.0853	18.2156	17.9907	18.3059	17.8718	17.949
	P11498	PYC_HUMAN Pyruvate carboxylase, mitochondrial OS=Homo sapiens OX=9606 GN=PC PE=1 SV=2	8	0.282147	0.513537	17.5352	13.7564	16.5157	16.8817	17.4642	16.8145	16.3857	16.6023
	Q9UNY4	TTF2_HUMAN Transcription termination factor 2 OS=Homo sapiens OX=9606 GN=TTF2 PE=1 SV=2	8	0.282803	0.647974	15.7732	13.6523	16.0894	15.4405	15.4862	15.6236	14.735	14.8634
	P26196	DDX6_HUMAN Probable ATP-dependent RNA helicase DDX6 OS=Homo sapiens OX=9606 GN=DDX6 PE=1 SV=2	12	0.283178	0.737667	19.332	18.2655	17.7054	18.1564	19.0082	18.1004	18.2393	18.0068
	Q96G03	PGM2_HUMAN Phosphoglucomutase-2 OS=Homo sapiens OX=9606 GN=PGM2 PE=1 SV=4	12	0.283817	1.09618	17.7229	17.9859	18.1061	17.8213	17.6713	17.9488	17.6535	17.9276
	P30050	RL12_HUMAN 60S ribosomal protein L12 OS=Homo sapiens OX=9606 GN=RPL12 PE=1 SV=1	5	0.284096	1.39259	18.6337	19.398	20.2137	19.7984	19.672	20.4596	19.5041	20.2787
	Q15287	RNPS1_HUMAN RNA-binding protein with serine-rich domain 1 OS=Homo sapiens OX=9606 GN=RNPS1 PE=1 SV=1	2	0.28423	0.802749	17.5704	17.2644	17.3574	17.5819	17.8988	16.9983	16.9815	16.6956
	P61916	NPC2_HUMAN NPC intracellular cholesterol transporter 2 OS=Homo sapiens OX=9606 GN=NPC2 PE=1 SV=1	2	0.284779	0.356373	13.3009	16.0154	15.9439	15.3598	18.5589	13.3467	17.3148	14.4425
	Q8IYB3	SRRM1_HUMAN Serine/arginine repetitive matrix protein 1 OS=Homo sapiens OX=9606 GN=SRRM1 PE=1 SV=2	3	0.285267	2.18696	17.241	17.4766	17.4289	17.2463	16.9357	17.2971	13.3813	17.4826
	P26006	ITA3_HUMAN Integrin alpha-3 OS=Homo sapiens OX=9606 GN=ITGA3 PE=1 SV=5	19	0.287619	0.770251	18.1165	18.9106	19.1167	18.3626	19.0239	18.5499	19.5446	18.4722
	Q01813	PFKAP_HUMAN ATP-dependent 6-phosphofructokinase, platelet type OS=Homo sapiens OX=9606 GN=PFKP PE=1 SV=2	21	0.28774	1.24418	19.1601	20.1852	20.241	19.8572	19.3708	20.0799	20.0511	19.9616
	P00338	LDHA_HUMAN L-lactate dehydrogenase A chain OS=Homo sapiens OX=9606 GN=LDHA PE=1 SV=2	2	0.287842	2.11407	16.1277	17.5901	13.9024	16.7012	16.0622	16.5954	14.5966	14.1223
	Q9UQ80	PA2G4_HUMAN Proliferation-associated protein 2G4 OS=Homo sapiens OX=9606 GN=PA2G4 PE=1 SV=3	13	0.288626	1.09146	19.257	19.3512	19.1177	19.153	18.8545	19.2792	19.2997	19.2506
	Q96KB5	TOPK_HUMAN Lymphokine-activated killer T-cell-originated protein kinase OS=Homo sapiens OX=9606 GN=PBK PE=1 SV=3	4	0.28953	0.670018	16.933	16.687	17.1447	16.363	17.1152	14.998	16.0563	16.8902
	Q01130	SRSF2_HUMAN Serine/arginine-rich splicing factor 2 OS=Homo sapiens OX=9606 GN=SRSF2 PE=1 SV=4	3	0.289832	1.2397	21.2126	21.2796	20.8341	20.7462	20.0471	20.9991	20.6329	20.9417
	Q14696	MESD_HUMAN LRP chaperone MESD OS=Homo sapiens OX=9606 GN=MESD PE=1 SV=2	4	0.290127	0.759481	18.3678	17.4517	16.9218	17.3497	18.0218	17.1407	17.2924	17.0741
	Q15717	ELAV1_HUMAN ELAV-like protein 1 OS=Homo sapiens OX=9606 GN=ELAVL1 PE=1 SV=2	7	0.290993	0.903577	19.2462	18.6614	19.0542	18.8003	18.7997	18.8963	18.7944	18.9513
	O14653	GOSR2_HUMAN Golgi SNAP receptor complex member 2 OS=Homo sapiens OX=9606 GN=GOSR2 PE=1 SV=2	4	0.291027	0.426888	16.831	13.9098	16.5007	15.4042	16.7082	13.1219	13.4782	16.1698
	P07737	PROF1_HUMAN Profilin-1 OS=Homo sapiens OX=9606 GN=PFN1 PE=1 SV=2	9	0.291114	1.14841	20.0048	20.6996	20.1467	20.4693	20.4712	20.6075	20.6619	20.3067
	Q6Y288	B3GLT_HUMAN Beta-1,3-glucosyltransferase OS=Homo sapiens OX=9606 GN=B3GLCT PE=1 SV=2	2	0.291747	1.2241	13.3519	13.6329	13.2649	13.8849	14.2329	14.2428	13.6018	13.8578
	Q14692	BMS1_HUMAN Ribosome biogenesis protein BMS1 homolog OS=Homo sapiens OX=9606 GN=BMS1 PE=1 SV=1	4	0.292023	0.619836	15.8563	13.3463	15.1007	13.9115	15.3784	15.1784	14.2075	15.3466
	Q08209	PP2BA_HUMAN Serine/threonine-protein phosphatase 2B catalytic subunit alpha isoform OS=Homo sapiens OX=9606 GN=PPP3CA PE=1 SV=1	5	0.292044	1.55965	15.8478	15.6213	16.0996	15.9855	16.0058	16.5346	13.9197	16.2964
	Q9H1I8	ASCC2_HUMAN Activating signal cointegrator 1 complex subunit 2 OS=Homo sapiens OX=9606 GN=ASCC2 PE=1 SV=3	3	0.292087	1.61205	14.8523	14.9803	14.9202	13.7911	13.8367	15.5874	14.3452	16.3512
	Q92769	HDAC2_HUMAN Histone deacetylase 2 OS=Homo sapiens OX=9606 GN=HDAC2 PE=1 SV=2	5	0.293196	0.784577	18.635	17.5401	17.8851	17.5559	17.972	17.5514	17.151	17.5955
	Q9Y6Y8	S23IP_HUMAN SEC23-interacting protein OS=Homo sapiens OX=9606 GN=SEC23IP PE=1 SV=1	8	0.293279	1.27061	16.618	16.3329	16.6389	16.7983	16.3848	16.6923	15.4393	16.6396
	Q9BZK7	TBL1R_HUMAN F-box-like/WD repeat-containing protein TBL1XR1 OS=Homo sapiens OX=9606 GN=TBL1XR1 PE=1 SV=1	7	0.294026	1.20853	15.7337	16.4218	16.694	16.9291	16.3721	16.5728	16.511	16.48
	Q6ZVM7	TM1L2_HUMAN TOM1-like protein 2 OS=Homo sapiens OX=9606 GN=TOM1L2 PE=1 SV=1	3	0.29441	0.806163	16.6833	16.6347	16.1763	15.984	16.8953	15.9457	15.9954	15.9425
	O60716	CTND1_HUMAN Catenin delta-1 OS=Homo sapiens OX=9606 GN=CTNND1 PE=1 SV=1	20	0.29458	0.869935	18.5446	18.1985	17.9294	17.9134	18.1131	17.7796	17.9164	17.808
	Q9NV70	EXOC1_HUMAN Exocyst complex component 1 OS=Homo sapiens OX=9606 GN=EXOC1 PE=1 SV=4	9	0.294938	0.884006	16.4342	16.6983	16.5155	16.6176	16.7486	16.3334	16.8307	16.1682
	Q15102	PA1B3_HUMAN Platelet-activating factor acetylhydrolase IB subunit gamma OS=Homo sapiens OX=9606 GN=PAFAH1B3 PE=1 SV=1	7	0.294982	0.786788	19.7057	18.9801	18.5107	18.6799	19.1598	18.5962	18.6313	18.3675
	Q8NE86	MCU_HUMAN Calcium uniporter protein, mitochondrial OS=Homo sapiens OX=9606 GN=MCU PE=1 SV=1	2	0.295684	1.43855	16.5075	16.1716	14.4012	16.4015	15.9547	16.2414	15.7918	15.9392
	Q14671	PUM1_HUMAN Pumilio homolog 1 OS=Homo sapiens OX=9606 GN=PUM1 PE=1 SV=3	5	0.296084	0.516378	16.9004	14.9702	14.815	15.1578	16.504	13.8745	13.6001	14.0031
	Q9NZB2	F120A_HUMAN Constitutive coactivator of PPAR-gamma-like protein 1 OS=Homo sapiens OX=9606 GN=FAM120A PE=1 SV=2	18	0.296332	1.33429	17.935	17.4186	17.8729	17.746	16.6974	17.8101	16.6957	17.8905
	Q15459	SF3A1_HUMAN Splicing factor 3A subunit 1 OS=Homo sapiens OX=9606 GN=SF3A1 PE=1 SV=1	8	0.296571	0.877631	18.6868	18.0184	18.2821	18.3475	18.5973	18.2643	18.0368	18.2197
	P36915	GNL1_HUMAN Guanine nucleotide-binding protein-like 1 OS=Homo sapiens OX=9606 GN=GNL1 PE=1 SV=2	4	0.296717	0.909232	17.1117	16.9872	17.1896	16.8591	17.382	17.0975	16.8578	17.0481
	Q16630	CPSF6_HUMAN Cleavage and polyadenylation specificity factor subunit 6 OS=Homo sapiens OX=9606 GN=CPSF6 PE=1 SV=2	5	0.296797	1.18265	17.5202	17.4892	17.058	18.0732	17.1911	17.3364	17.4271	17.2658
	P30711	GSTT1_HUMAN Glutathione S-transferase theta-1 OS=Homo sapiens OX=9606 GN=GSTT1 PE=1 SV=4	4	0.297279	0.663814	14.1622	15.4615	15.5907	14.6536	16.3784	14.8216	16.0323	14.8621
	Q93009	UBP7_HUMAN Ubiquitin carboxyl-terminal hydrolase 7 OS=Homo sapiens OX=9606 GN=USP7 PE=1 SV=2	10	0.297787	1.11235	16.3597	16.4779	16.1834	16.3664	16.4362	16.2463	15.8682	16.3714
	O15484	CAN5_HUMAN Calpain-5 OS=Homo sapiens OX=9606 GN=CAPN5 PE=1 SV=2	2	0.297813	0.83863	15.8602	15.4007	16.0878	15.2435	15.1151	15.4103	15.4089	15.4018
	P55769	NH2L1_HUMAN NHP2-like protein 1 OS=Homo sapiens OX=9606 GN=SNU13 PE=1 SV=3	4	0.297832	1.79168	14.018	15.0284	16.0468	15.9636	16.4575	16.5723	13.9701	16.2934
	Q16851	UGPA_HUMAN UTP--glucose-1-phosphate uridylyltransferase OS=Homo sapiens OX=9606 GN=UGP2 PE=1 SV=5	9	0.298272	1.36725	16.1285	17.3605	17.3228	17.7184	17.0584	17.7242	17.9938	17.5056
	Q03135	CAV1_HUMAN Caveolin-1 OS=Homo sapiens OX=9606 GN=CAV1 PE=1 SV=4	5	0.298896	0.867895	20.5962	20.416	20.125	20.3714	20.7525	19.9875	20.2365	20.1179
	O95169	NDUB8_HUMAN NADH dehydrogenase [ubiquinone] 1 beta subcomplex subunit 8, mitochondrial OS=Homo sapiens OX=9606 GN=NDUFB8 PE=1 SV=1	3	0.299688	0.460142	17.6079	15.4957	15.7165	16.0965	17.3234	15.1383	14.0714	13.5093
	Q9NR46	SHLB2_HUMAN Endophilin-B2 OS=Homo sapiens OX=9606 GN=SH3GLB2 PE=1 SV=1	4	0.300005	1.74475	16.7568	16.4699	15.8922	16.6378	15.4897	16.3346	13.6129	15.5214
	Q8IY67	RAVR1_HUMAN Ribonucleoprotein PTB-binding 1 OS=Homo sapiens OX=9606 GN=RAVER1 PE=1 SV=1	3	0.300239	2.08571	16.0605	16.3324	16.4629	16.2236	16.218	16.4775	12.5276	16.4777
	Q03701	CEBPZ_HUMAN CCAAT/enhancer-binding protein zeta OS=Homo sapiens OX=9606 GN=CEBPZ PE=1 SV=3	6	0.301189	1.60795	14.5357	14.4268	15.7	16.3423	15.4044	16.073	13.8136	15.3525
	Q96CM8	ACSF2_HUMAN Medium-chain acyl-CoA ligase ACSF2, mitochondrial OS=Homo sapiens OX=9606 GN=ACSF2 PE=1 SV=2	3	0.301698	1.31478	15.4891	15.7637	16.3246	16.1721	14.6755	15.9096	15.5957	15.8188
	P53999	TCP4_HUMAN Activated RNA polymerase II transcriptional coactivator p15 OS=Homo sapiens OX=9606 GN=SUB1 PE=1 SV=3	2	0.301951	0.368956	17.7381	18.7185	17.9424	18.327	20.3831	13.8872	18.5905	17.9675
	Q9BSF4	TIM29_HUMAN Mitochondrial import inner membrane translocase subunit Tim29 OS=Homo sapiens OX=9606 GN=TIMM29 PE=1 SV=2	2	0.302741	1.50222	14.8251	14.1217	15.5683	15.4843	13.9893	15.4854	13.9503	15.5901
	A4D1E9	GTPBA_HUMAN GTP-binding protein 10 OS=Homo sapiens OX=9606 GN=GTPBP10 PE=1 SV=1	3	0.302844	0.702596	16.0692	13.849	14.4708	14.3738	14.2592	14.4907	14.7453	14.7939
	Q9UKL0	RCOR1_HUMAN REST corepressor 1 OS=Homo sapiens OX=9606 GN=RCOR1 PE=1 SV=2	3	0.30443	0.595028	15.2304	13.2702	16.2861	15.6287	14.2981	14.3721	14.4866	14.0343
	P40227	TCPZ_HUMAN T-complex protein 1 subunit zeta OS=Homo sapiens OX=9606 GN=CCT6A PE=1 SV=3	11	0.304519	0.950199	20.1126	19.8316	19.9258	19.8672	19.9895	19.8957	19.8354	19.9741
	P51608	MECP2_HUMAN Methyl-CpG-binding protein 2 OS=Homo sapiens OX=9606 GN=MECP2 PE=1 SV=1	5	0.305684	1.48161	14.6989	13.7217	14.5847	15.7422	14.0975	14.9816	13.4457	14.65
	Q12981	SEC20_HUMAN Vesicle transport protein SEC20 OS=Homo sapiens OX=9606 GN=BNIP1 PE=1 SV=3	2	0.306747	1.55072	13.5205	16.2206	15.7868	15.5245	15.3851	15.3108	15.6777	15.846
	Q96C19	EFHD2_HUMAN EF-hand domain-containing protein D2 OS=Homo sapiens OX=9606 GN=EFHD2 PE=1 SV=1	5	0.306917	0.750028	16.642	16.0713	15.1879	15.7247	16.691	15.6819	16.5403	15.9234
	Q96Q11	TRNT1_HUMAN CCA tRNA nucleotidyltransferase 1, mitochondrial OS=Homo sapiens OX=9606 GN=TRNT1 PE=1 SV=2	4	0.307022	0.527879	15.9693	14.4452	15.8268	15.6156	16.0963	15.636	14.1835	12.6923
	Q7Z417	NUFP2_HUMAN Nuclear fragile X mental retardation-interacting protein 2 OS=Homo sapiens OX=9606 GN=NUFIP2 PE=1 SV=1	3	0.307604	0.601098	16.3844	14.9726	15.2676	14.7626	16.7602	15.1337	13.8936	14.4997
	Q9UBQ0	VPS29_HUMAN Vacuolar protein sorting-associated protein 29 OS=Homo sapiens OX=9606 GN=VPS29 PE=1 SV=1	7	0.307727	0.576244	15.7466	13.9259	16.2111	16.5605	17.1926	16.6881	16.8321	15.6269
	Q9NPE3	NOP10_HUMAN H/ACA ribonucleoprotein complex subunit 3 OS=Homo sapiens OX=9606 GN=NOP10 PE=1 SV=1	2	0.309329	1.33642	14.9231	14.1418	14.0881	14.5404	13.9363	14.8054	13.2202	14.3536
	Q93034	CUL5_HUMAN Cullin-5 OS=Homo sapiens OX=9606 GN=CUL5 PE=1 SV=4	4	0.309611	1.41831	14.5346	15.5048	15.716	15.4415	15.9871	15.6793	14.1397	15.7684
	Q8NFH4	NUP37_HUMAN Nucleoporin Nup37 OS=Homo sapiens OX=9606 GN=NUP37 PE=1 SV=1	3	0.309779	0.72715	17.2225	15.3653	16.773	16.4773	15.7065	16.4517	16.7148	16.2839
	A1L0T0	HACL2_HUMAN 2-hydroxyacyl-CoA lyase 2 OS=Homo sapiens OX=9606 GN=ILVBL PE=1 SV=2	7	0.310132	1.43099	15.967	16.8031	17.1091	16.7009	15.2817	17.1234	17.1551	16.9536
	O14776	TCRG1_HUMAN Transcription elongation regulator 1 OS=Homo sapiens OX=9606 GN=TCERG1 PE=1 SV=2	8	0.310304	0.560937	17.0629	13.8718	16.907	16.896	16.9347	16.5265	16.8212	17.0951
	P67870	CSK2B_HUMAN Casein kinase II subunit beta OS=Homo sapiens OX=9606 GN=CSNK2B PE=1 SV=1	4	0.310407	1.13335	18.2388	18.4795	18.1123	18.3243	18.2259	18.0188	17.6884	18.1652
	Q9NSE4	SYIM_HUMAN Isoleucine--tRNA ligase, mitochondrial OS=Homo sapiens OX=9606 GN=IARS2 PE=1 SV=2	15	0.310437	0.922822	17.5182	17.1452	17.5999	17.5069	17.4972	17.5191	17.3351	17.3158
	Q5JTH9	RRP12_HUMAN RRP12-like protein OS=Homo sapiens OX=9606 GN=RRP12 PE=1 SV=2	7	0.310937	0.553848	16.0896	14.5214	15.1072	14.1432	17.5026	15.4085	14.2615	15.478
	P01111	RASN_HUMAN GTPase NRas OS=Homo sapiens OX=9606 GN=NRAS PE=1 SV=1	1	0.311189	1.37367	16.9735	17.6077	16.4562	17.2466	17.5351	17.5707	16.082	16.454
	P21796	VDAC1_HUMAN Voltage-dependent anion-selective channel protein 1 OS=Homo sapiens OX=9606 GN=VDAC1 PE=1 SV=2	11	0.311537	1.16526	18.1973	18.0538	17.641	17.9572	18.1446	18.1582	17.3956	18.0919
	P24539	AT5F1_HUMAN ATP synthase F(0) complex subunit B1, mitochondrial OS=Homo sapiens OX=9606 GN=ATP5PB PE=1 SV=2	7	0.311849	1.17441	17.8441	18.2111	18.466	18.6118	18.6806	18.6895	18.2139	18.62
	Q9BXP5	SRRT_HUMAN Serrate RNA effector molecule homolog OS=Homo sapiens OX=9606 GN=SRRT PE=1 SV=1	8	0.311878	0.634093	18.6376	16.1395	17.1785	16.7846	17.7973	17.0432	15.99	17.0072
	Q7Z5L9	I2BP2_HUMAN Interferon regulatory factor 2-binding protein 2 OS=Homo sapiens OX=9606 GN=IRF2BP2 PE=1 SV=2	6	0.314008	0.488669	16.3703	13.6903	14.75	13.8904	16.9587	14.9481	12.9609	14.3787
	Q9Y4P3	TBL2_HUMAN Transducin beta-like protein 2 OS=Homo sapiens OX=9606 GN=TBL2 PE=1 SV=1	8	0.314023	1.70412	14.5582	17.1055	17.5709	17.1828	17.2916	17.499	16.92	17.6294
	Q16777	H2A2C_HUMAN Histone H2A type 2-C OS=Homo sapiens OX=9606 GN=H2AC20 PE=1 SV=4;sp	1	0.314039	1.41647	21.864	23.0278	23.1155	22.9801	21.9964	23.3067	23.7123	23.3827
	Q9H814	PHAX_HUMAN Phosphorylated adapter RNA export protein OS=Homo sapiens OX=9606 GN=PHAX PE=1 SV=1	4	0.314198	0.75562	16.2951	14.9531	15.4169	14.7707	14.5953	14.9067	15.0134	15.0732
	O43719	HTSF1_HUMAN HIV Tat-specific factor 1 OS=Homo sapiens OX=9606 GN=HTATSF1 PE=1 SV=1	11	0.314873	0.616564	18.0803	16.9164	16.1985	14.9785	17.1527	16.2915	15.9715	16.4261
	Q9UPQ0	LIMC1_HUMAN LIM and calponin homology domains-containing protein 1 OS=Homo sapiens OX=9606 GN=LIMCH1 PE=1 SV=4	9	0.314991	0.850503	16.6354	16.3196	16.6722	16.0674	16.4044	16.6216	16.0867	15.8557
	P27695	APEX1_HUMAN DNA-(apurinic or apyrimidinic site) lyase OS=Homo sapiens OX=9606 GN=APEX1 PE=1 SV=2	11	0.315233	0.929729	18.7583	18.5437	18.5373	18.5833	18.8981	18.5307	18.5013	18.617
	P48739	PIPNB_HUMAN Phosphatidylinositol transfer protein beta isoform OS=Homo sapiens OX=9606 GN=PITPNB PE=1 SV=2	5	0.315289	0.804057	17.8797	16.8959	17.2402	17.0836	17.3221	16.911	16.5101	16.8031
	Q9UHG3	PCYOX_HUMAN Prenylcysteine oxidase 1 OS=Homo sapiens OX=9606 GN=PCYOX1 PE=1 SV=3	6	0.316376	0.859824	17.5768	17.2398	17.0676	17.2041	16.9735	17.1317	17.5273	16.6982
	Q10570	CPSF1_HUMAN Cleavage and polyadenylation specificity factor subunit 1 OS=Homo sapiens OX=9606 GN=CPSF1 PE=1 SV=2	8	0.317317	0.757293	16.1075	14.7214	16.0137	15.3883	15.424	15.2293	14.641	15.2428
	Q9UGJ0	AAKG2_HUMAN 5-AMP-activated protein kinase subunit gamma-2 OS=Homo sapiens OX=9606 GN=PRKAG2 PE=1 SV=1	3	0.317628	0.900014	14.2545	14.633	14.4365	14.2897	14.6621	14.3017	14.7116	14.2324
	Q8WWM7	ATX2L_HUMAN Ataxin-2-like protein OS=Homo sapiens OX=9606 GN=ATXN2L PE=1 SV=2	10	0.318161	1.33663	16.935	17.2799	16.4874	17.1617	17.4118	16.9627	15.6783	16.7825
	P21283	VATC1_HUMAN V-type proton ATPase subunit C 1 OS=Homo sapiens OX=9606 GN=ATP6V1C1 PE=1 SV=4	5	0.318551	0.829992	17.7249	17.3974	17.069	16.8715	17.3927	16.6044	16.9386	17.1766
	Q9P0I2	EMC3_HUMAN ER membrane protein complex subunit 3 OS=Homo sapiens OX=9606 GN=EMC3 PE=1 SV=3	5	0.319349	1.69018	16.52	16.4053	15.5937	16.3545	16.7221	16.2703	13.6751	16.5095
	P09622	DLDH_HUMAN Dihydrolipoyl dehydrogenase, mitochondrial OS=Homo sapiens OX=9606 GN=DLD PE=1 SV=2	8	0.320009	1.23283	18.7036	19.3808	19.4604	19.1786	18.5417	19.5811	19.6036	19.3766
	Q9HC07	TM165_HUMAN Transmembrane protein 165 OS=Homo sapiens OX=9606 GN=TMEM165 PE=1 SV=1	4	0.320887	0.76355	17.9476	16.7221	18.1888	17.7595	18.3391	17.9405	17.3262	17.8228
	Q9Y4B5	MTCL1_HUMAN Microtubule cross-linking factor 1 OS=Homo sapiens OX=9606 GN=MTCL1 PE=1 SV=5	5	0.321404	0.562475	16.7585	14.3704	13.9693	13.5615	14.8733	14.3067	13.4299	13.4719
	Q7Z3B4	NUP54_HUMAN Nucleoporin p54 OS=Homo sapiens OX=9606 GN=NUP54 PE=1 SV=2	7	0.321644	0.474447	16.2728	13.4914	12.5333	15.46	16.0536	13.732	15.4636	13.3372
	P13674	P4HA1_HUMAN Prolyl 4-hydroxylase subunit alpha-1 OS=Homo sapiens OX=9606 GN=P4HA1 PE=1 SV=2	16	0.321713	0.852406	18.158	18.1022	18.9373	18.3399	18.6097	18.7131	18.8198	18.4481
	Q9Y2L1	RRP44_HUMAN Exosome complex exonuclease RRP44 OS=Homo sapiens OX=9606 GN=DIS3 PE=1 SV=2	10	0.32279	0.7171	17.3982	15.4017	15.9701	15.4188	15.7029	16.1325	15.6984	15.8976
	Q05048	CSTF1_HUMAN Cleavage stimulation factor subunit 1 OS=Homo sapiens OX=9606 GN=CSTF1 PE=1 SV=1	6	0.323345	0.798224	16.789	15.9122	15.8579	15.9702	17.0126	16.3008	15.9732	16.149
	Q9P260	RELCH_HUMAN RAB11-binding protein RELCH OS=Homo sapiens OX=9606 GN=RELCH PE=1 SV=2	6	0.323422	1.73609	16.2265	15.6274	13.6846	15.7895	14.8928	14.1665	13.7662	16.1699
	P23919	KTHY_HUMAN Thymidylate kinase OS=Homo sapiens OX=9606 GN=DTYMK PE=1 SV=4	6	0.323689	0.529759	16.8802	17.1434	17.6173	17.1596	17.3188	17.262	17.2486	13.8336
	Q8NFV4	ABHDB_HUMAN Protein ABHD11 OS=Homo sapiens OX=9606 GN=ABHD11 PE=1 SV=1	3	0.323879	1.24834	15.9159	16.9068	16.7205	16.5415	16.0636	16.9804	17.1045	16.6559
	Q12931	TRAP1_HUMAN Heat shock protein 75 kDa, mitochondrial OS=Homo sapiens OX=9606 GN=TRAP1 PE=1 SV=3	8	0.325314	1.22007	16.3225	17.19	17.0223	16.2297	16.3215	16.9275	16.3193	16.7862
	P05141	ADT2_HUMAN ADP/ATP translocase 2 OS=Homo sapiens OX=9606 GN=SLC25A5 PE=1 SV=7	5	0.326105	1.58966	18.0358	18.3838	18.5572	18.6544	18.9639	18.6385	16.1529	18.7079
	P46977	STT3A_HUMAN Dolichyl-diphosphooligosaccharide--protein glycosyltransferase subunit STT3A OS=Homo sapiens OX=9606 GN=STT3A PE=1 SV=2	10	0.326287	0.73902	16.883	15.7681	15.9611	16.5052	16.0252	16.416	16.5978	15.0324
	Q9H8Y8	GORS2_HUMAN Golgi reassembly-stacking protein 2 OS=Homo sapiens OX=9606 GN=GORASP2 PE=1 SV=3	7	0.32671	0.76829	17.1137	17.1739	16.7606	16.6634	18.3045	16.9021	17.3189	17.2372
	P30086	PEBP1_HUMAN Phosphatidylethanolamine-binding protein 1 OS=Homo sapiens OX=9606 GN=PEBP1 PE=1 SV=3	8	0.326784	0.939587	19.8244	19.8588	20.0059	19.9402	19.9268	19.988	20.1303	19.7409
	O00217	NDUS8_HUMAN NADH dehydrogenase [ubiquinone] iron-sulfur protein 8, mitochondrial OS=Homo sapiens OX=9606 GN=NDUFS8 PE=1 SV=1	3	0.327593	0.692347	13.7805	14.3769	14.6697	13.7786	13.7307	13.9256	15.7559	13.734
	Q13616	CUL1_HUMAN Cullin-1 OS=Homo sapiens OX=9606 GN=CUL1 PE=1 SV=2	9	0.327937	0.846129	17.1623	16.3797	16.5073	16.5319	16.7129	16.3975	16.1173	16.2264
	Q9Y3E1	HDGR3_HUMAN Hepatoma-derived growth factor-related protein 3 OS=Homo sapiens OX=9606 GN=HDGFL3 PE=1 SV=1	2	0.328051	1.8052	14.5138	16.4204	16.2374	16.4893	14.3701	16.9338	17.7086	16.3951
	O15371	EIF3D_HUMAN Eukaryotic translation initiation factor 3 subunit D OS=Homo sapiens OX=9606 GN=EIF3D PE=1 SV=1	8	0.328332	1.13916	18.1469	18.2325	17.9116	18.2996	18.3701	18.0674	17.5775	18.1585
	P04062	GLCM_HUMAN Lysosomal acid glucosylceramidase OS=Homo sapiens OX=9606 GN=GBA PE=1 SV=3	5	0.328376	1.11823	16.4776	17.0311	16.9539	17.0181	16.7352	17.0137	17.1768	16.9254
	Q9Y608	LRRF2_HUMAN Leucine-rich repeat flightless-interacting protein 2 OS=Homo sapiens OX=9606 GN=LRRFIP2 PE=1 SV=1	7	0.328648	0.874565	17.1199	16.5937	17.1766	16.6974	16.43	16.9024	16.92	16.6795
	Q7Z4Q2	HEAT3_HUMAN HEAT repeat-containing protein 3 OS=Homo sapiens OX=9606 GN=HEATR3 PE=1 SV=2	3	0.329134	0.834513	16.6523	16.8488	17.0783	16.1352	16.452	16.6976	16.5649	16.0219
	P36639	8ODP_HUMAN 7,8-dihydro-8-oxoguanine triphosphatase OS=Homo sapiens OX=9606 GN=NUDT1 PE=1 SV=3	2	0.329306	0.471249	16.6267	14.8404	15.6863	13.5245	16.811	14.4693	12.5702	14.5183
	O43396	TXNL1_HUMAN Thioredoxin-like protein 1 OS=Homo sapiens OX=9606 GN=TXNL1 PE=1 SV=3	7	0.329583	0.727589	18.8417	17.1311	17.2655	17.4234	18.531	17.8766	17.3903	17.7622
	Q96ST3	SIN3A_HUMAN Paired amphipathic helix protein Sin3a OS=Homo sapiens OX=9606 GN=SIN3A PE=1 SV=2	5	0.329614	1.24096	15.7255	15.3523	15.7726	15.7806	15.1967	15.6848	14.5843	15.7074
	P13984	T2FB_HUMAN General transcription factor IIF subunit 2 OS=Homo sapiens OX=9606 GN=GTF2F2 PE=1 SV=2	6	0.329941	1.34129	15.9653	16.1529	16.7636	16.3163	16.1756	16.4705	14.897	16.5562
	P08754	GNAI3_HUMAN Guanine nucleotide-binding protein G(i) subunit alpha OS=Homo sapiens OX=9606 GN=GNAI3 PE=1 SV=3	3	0.330252	1.19091	16.897	16.6188	16.1147	16.4477	15.95	16.2869	16.2037	16.8203
	Q96RS6	NUDC1_HUMAN NudC domain-containing protein 1 OS=Homo sapiens OX=9606 GN=NUDCD1 PE=1 SV=2	6	0.330705	0.903737	17.3846	17.5299	17.2969	17.1101	17.3304	17.2241	17.3085	16.8721
	Q15435	PP1R7_HUMAN Protein phosphatase 1 regulatory subunit 7 OS=Homo sapiens OX=9606 GN=PPP1R7 PE=1 SV=1	7	0.330746	0.843301	16.6287	16.8885	16.8959	15.8586	16.7176	16.507	16.7144	16.7191
	O15260	SURF4_HUMAN Surfeit locus protein 4 OS=Homo sapiens OX=9606 GN=SURF4 PE=1 SV=3	5	0.331059	0.797958	17.8715	16.7824	16.5868	16.819	17.5663	16.8673	16.874	17.1275
	Q9Y4Z0	LSM4_HUMAN U6 snRNA-associated Sm-like protein LSm4 OS=Homo sapiens OX=9606 GN=LSM4 PE=1 SV=1	3	0.332925	1.50745	16.8568	18.1048	17.4302	18.0969	16.2877	17.7183	18.8715	17.8947
	O95352	ATG7_HUMAN Ubiquitin-like modifier-activating enzyme ATG7 OS=Homo sapiens OX=9606 GN=ATG7 PE=1 SV=1	4	0.332938	0.622242	15.9839	12.935	14.032	14.8214	13.9351	14.0031	13.9277	13.3813
	Q8WU90	ZC3HF_HUMAN Zinc finger CCCH domain-containing protein 15 OS=Homo sapiens OX=9606 GN=ZC3H15 PE=1 SV=1	6	0.333007	0.743275	18.1114	16.2641	16.3941	16.8411	17.1613	16.6441	16.5931	16.7985
	O15540	FABP7_HUMAN Fatty acid-binding protein, brain OS=Homo sapiens OX=9606 GN=FABP7 PE=1 SV=3	3	0.333711	0.840584	17.7213	17.4264	18.3738	17.8029	17.567	18.0731	18.1822	17.5397
	P09132	SRP19_HUMAN Signal recognition particle 19 kDa protein OS=Homo sapiens OX=9606 GN=SRP19 PE=1 SV=3	4	0.33437	1.54491	14.9878	16.0016	15.1546	16.4039	16.1697	17.5544	16.8667	15.729
	Q9HAV4	XPO5_HUMAN Exportin-5 OS=Homo sapiens OX=9606 GN=XPO5 PE=1 SV=1	6	0.334405	1.5021	14.3969	14.3183	15.6539	15.6158	14.028	15.7221	15.4098	16.1805
	Q15293	RCN1_HUMAN Reticulocalbin-1 OS=Homo sapiens OX=9606 GN=RCN1 PE=1 SV=1	14	0.334703	1.05734	19.8057	19.7566	19.528	19.7985	19.8594	19.7997	19.6427	19.8027
	O15031	PLXB2_HUMAN Plexin-B2 OS=Homo sapiens OX=9606 GN=PLXNB2 PE=1 SV=3	7	0.335171	0.566723	15.7421	13.1654	14.8397	15.2948	16.9034	14.9831	14.0062	14.7709
	Q9UBT7	CTNL1_HUMAN Alpha-catulin OS=Homo sapiens OX=9606 GN=CTNNAL1 PE=1 SV=2	3	0.335656	0.797232	14.3451	13.6344	13.7771	13.9433	14.0549	13.6014	14.8386	14.5287
	Q9BUQ8	DDX23_HUMAN Probable ATP-dependent RNA helicase DDX23 OS=Homo sapiens OX=9606 GN=DDX23 PE=1 SV=3	6	0.338899	0.834414	15.0846	14.0744	14.8161	14.3199	14.133	14.2521	14.3106	14.6531
	P62136	PP1A_HUMAN Serine/threonine-protein phosphatase PP1-alpha catalytic subunit OS=Homo sapiens OX=9606 GN=PPP1CA PE=1 SV=1	4	0.339263	0.922793	19.3105	19.4371	19.2516	19.2075	19.2713	19.2338	19.6345	19.1261
	P62424	RL7A_HUMAN 60S ribosomal protein L7a OS=Homo sapiens OX=9606 GN=RPL7A PE=1 SV=2	13	0.33978	1.24248	20.2174	20.2559	20.7659	20.5798	20.6108	20.6483	19.5573	20.9201
	Q7Z3K3	POGZ_HUMAN Pogo transposable element with ZNF domain OS=Homo sapiens OX=9606 GN=POGZ PE=1 SV=2	2	0.340766	1.50731	14.8094	15.9674	14.4772	15.9233	15.6094	13.9441	14.6826	16.1116
	Q01105	SET_HUMAN Protein SET OS=Homo sapiens OX=9606 GN=SET PE=1 SV=3;sp	6	0.341274	1.13376	19.4495	19.2359	19.347	19.5579	19.6317	19.5583	19.1	19.9006
	P52948	NUP98_HUMAN Nuclear pore complex protein Nup98-Nup96 OS=Homo sapiens OX=9606 GN=NUP98 PE=1 SV=4	10	0.343034	1.2431	16.9878	16.8322	16.1422	16.5082	15.5729	16.5034	16.3086	16.4234
	Q86Y82	STX12_HUMAN Syntaxin-12 OS=Homo sapiens OX=9606 GN=STX12 PE=1 SV=1	4	0.343504	1.69586	16.5439	16.8209	16.133	16.7703	17.3092	16.6194	13.8681	16.6917
	Q15555	MARE2_HUMAN Microtubule-associated protein RP/EB family member 2 OS=Homo sapiens OX=9606 GN=MAPRE2 PE=1 SV=1	2	0.34394	0.641272	17.0359	16.3488	15.971	14.0888	16.603	16.045	15.4469	16.0101
	Q9UHD9	UBQL2_HUMAN Ubiquilin-2 OS=Homo sapiens OX=9606 GN=UBQLN2 PE=1 SV=2	6	0.344376	0.944665	18.2604	18.1674	18.2545	17.999	18.0333	18.0912	18.0171	17.9791
	O00425	IF2B3_HUMAN Insulin-like growth factor 2 mRNA-binding protein 3 OS=Homo sapiens OX=9606 GN=IGF2BP3 PE=1 SV=2	3	0.344408	1.49416	14.4459	15.8004	16.4243	16.3661	15.6758	16.7263	16.7955	16.766
	Q8WVC6	DCAKD_HUMAN Dephospho-CoA kinase domain-containing protein OS=Homo sapiens OX=9606 GN=DCAKD PE=1 SV=1	3	0.344559	1.43161	14.3523	14.6601	15.6646	15.0463	14.5886	15.2917	13.2879	14.9658
	O75955	FLOT1_HUMAN Flotillin-1 OS=Homo sapiens OX=9606 GN=FLOT1 PE=1 SV=3	11	0.34478	1.11467	17.4431	17.6311	18.0294	17.9361	17.797	18.0494	17.6381	17.9175
	Q5JRX3	PREP_HUMAN Presequence protease, mitochondrial OS=Homo sapiens OX=9606 GN=PITRM1 PE=1 SV=3	17	0.345038	1.47662	16.8332	16.7965	16.4244	16.7811	16.8946	16.5675	14.5758	16.8322
	Q9Y3B4	SF3B6_HUMAN Splicing factor 3B subunit 6 OS=Homo sapiens OX=9606 GN=SF3B6 PE=1 SV=1	2	0.345345	0.851843	16.9717	17.1234	16.8091	17.0663	17.141	16.9365	17.5476	16.4178
	Q9BT09	CNPY3_HUMAN Protein canopy homolog 3 OS=Homo sapiens OX=9606 GN=CNPY3 PE=1 SV=1	3	0.345462	0.769634	17.1152	16.8435	15.9665	16.7814	17.1149	16.1302	16.9068	15.8373
	Q9UKE5	TNIK_HUMAN TRAF2 and NCK-interacting protein kinase OS=Homo sapiens OX=9606 GN=TNIK PE=1 SV=1	2	0.345499	0.600946	16.1756	14.2364	13.6069	12.9668	14.8372	13.7039	13.2618	14.0356
	Q8WTW3	COG1_HUMAN Conserved oligomeric Golgi complex subunit 1 OS=Homo sapiens OX=9606 GN=COG1 PE=1 SV=1	2	0.345956	1.32296	13.784	14.2912	15.3142	15.132	14.0288	14.7626	14.5891	15.1454
	Q9BVP2	GNL3_HUMAN Guanine nucleotide-binding protein-like 3 OS=Homo sapiens OX=9606 GN=GNL3 PE=1 SV=2	2	0.347326	0.744339	15.6593	14.3103	15.5046	15.3449	15.6822	14.4421	14.6382	15.6831
	Q9UKD2	MRT4_HUMAN mRNA turnover protein 4 homolog OS=Homo sapiens OX=9606 GN=MRTO4 PE=1 SV=2	3	0.347824	1.82645	16.0064	14.9281	16.6323	16.9177	13.6762	16.9911	16.2541	17.2082
	O60232	ZNRD2_HUMAN Protein ZNRD2 OS=Homo sapiens OX=9606 GN=ZNRD2 PE=1 SV=1	2	0.347886	1.69965	14.2567	13.418	15.6181	15.4413	14.1908	16.0576	13.2967	15.5064
	P04083	ANXA1_HUMAN Annexin A1 OS=Homo sapiens OX=9606 GN=ANXA1 PE=1 SV=2	19	0.347908	1.06094	22.7052	22.7705	22.5844	22.6636	22.438	22.6951	22.8104	22.7502
	Q16204	CCDC6_HUMAN Coiled-coil domain-containing protein 6 OS=Homo sapiens OX=9606 GN=CCDC6 PE=1 SV=2	6	0.347947	1.44333	16.8089	16.3405	16.3321	16.0738	14.4571	16.412	15.5734	16.4628
	P23526	SAHH_HUMAN Adenosylhomocysteinase OS=Homo sapiens OX=9606 GN=AHCY PE=1 SV=4	14	0.349131	1.09867	19.7094	20.0047	19.9601	20.2135	20.3148	20.0948	19.8949	20.1093
	Q15599	NHRF2_HUMAN Na(+)/H(+) exchange regulatory cofactor NHE-RF2 OS=Homo sapiens OX=9606 GN=SLC9A3R2 PE=1 SV=2	7	0.34996	0.659649	14.3187	14.5941	15.9332	15.4211	16.5649	14.9987	14.7157	14.1177
	Q14165	MLEC_HUMAN Malectin OS=Homo sapiens OX=9606 GN=MLEC PE=1 SV=1	6	0.350566	0.59619	19.2519	16.1175	16.2001	16.545	16.5817	16.2262	16.2597	16.42
	P52789	HXK2_HUMAN Hexokinase-2 OS=Homo sapiens OX=9606 GN=HK2 PE=1 SV=2	5	0.351412	1.72029	13.6957	13.7345	15.9842	16.2699	14.851	16.3215	14.5419	15.8776
	P35250	RFC2_HUMAN Replication factor C subunit 2 OS=Homo sapiens OX=9606 GN=RFC2 PE=1 SV=3	4	0.351848	0.404788	18.1979	14.1561	17.4558	13.7476	13.4764	16.6619	17.07	16.4156
	Q9Y277	VDAC3_HUMAN Voltage-dependent anion-selective channel protein 3 OS=Homo sapiens OX=9606 GN=VDAC3 PE=1 SV=1	3	0.351928	2.46988	13.648	17.215	17.3946	13.2832	13.9701	17.0465	13.6523	16.338
	Q9NRF9	DPOE3_HUMAN DNA polymerase epsilon subunit 3 OS=Homo sapiens OX=9606 GN=POLE3 PE=1 SV=1	2	0.352202	0.822571	14.367	14.5007	15.4366	14.6129	15.2653	15.0518	15.249	15.0253
	Q15021	CND1_HUMAN Condensin complex subunit 1 OS=Homo sapiens OX=9606 GN=NCAPD2 PE=1 SV=3	22	0.352598	0.905174	17.0798	17.0117	16.9762	16.7308	16.9775	16.7779	16.6031	16.5413
	P17480	UBF1_HUMAN Nucleolar transcription factor 1 OS=Homo sapiens OX=9606 GN=UBTF PE=1 SV=1	7	0.352612	0.792323	16.2193	15.3778	15.6788	15.3005	15.9459	15.1195	14.7182	15.4211
	P38606	VATA_HUMAN V-type proton ATPase catalytic subunit A OS=Homo sapiens OX=9606 GN=ATP6V1A PE=1 SV=2	16	0.352794	1.15312	17.6257	17.8565	18.1275	18.039	17.4339	18.267	18.1887	18.0355
	Q8N6T3	ARFG1_HUMAN ADP-ribosylation factor GTPase-activating protein 1 OS=Homo sapiens OX=9606 GN=ARFGAP1 PE=1 SV=2	5	0.35306	0.714023	16.5532	14.451	14.7638	15.7831	15.8581	15.3614	16.0382	15.6739
	P04439	HLAA_HUMAN HLA class I histocompatibility antigen, A alpha chain OS=Homo sapiens OX=9606 GN=HLA-A PE=1 SV=2	2	0.354181	0.881718	19.7653	19.2465	20.1065	19.7467	19.9018	19.9552	19.6342	19.733
	P57740	NU107_HUMAN Nuclear pore complex protein Nup107 OS=Homo sapiens OX=9606 GN=NUP107 PE=1 SV=1	6	0.354555	0.634883	15.5447	13.4423	16.4646	15.0086	14.3044	15.452	15.6658	15.4548
	P32969	RL9_HUMAN 60S ribosomal protein L9 OS=Homo sapiens OX=9606 GN=RPL9 PE=1 SV=1	9	0.35489	1.21739	18.8843	19.9981	20.1214	19.9649	19.7523	20.0186	20.0367	19.9482
	P18206	VINC_HUMAN Vinculin OS=Homo sapiens OX=9606 GN=VCL PE=1 SV=4	35	0.354899	1.05338	19.6209	19.9316	19.8209	19.6839	19.8582	19.8478	19.7089	19.8457
	Q3LXA3	TKFC_HUMAN Triokinase/FMN cyclase OS=Homo sapiens OX=9606 GN=TKFC PE=1 SV=2	5	0.354987	0.731335	17.801	16.8934	15.9592	16.9118	16.948	16.32	17.1428	15.9201
	Q9GZT4	SRR_HUMAN Serine racemase OS=Homo sapiens OX=9606 GN=SRR PE=1 SV=1	3	0.355299	0.730909	15.1261	13.8603	15.9596	15.5126	15.0118	15.5688	15.5277	14.8746
	Q06587	RING1_HUMAN E3 ubiquitin-protein ligase RING1 OS=Homo sapiens OX=9606 GN=RING1 PE=1 SV=2	3	0.356016	0.646626	15.9927	16.2147	15.8656	15.9572	15.3896	13.686	16.6637	15.5377
	O75909	CCNK_HUMAN Cyclin-K OS=Homo sapiens OX=9606 GN=CCNK PE=1 SV=2	3	0.356126	0.586681	16.198	14.7376	15.6396	13.324	16.3858	15.7834	13.9181	15.2191
	Q99848	EBP2_HUMAN Probable rRNA-processing protein EBP2 OS=Homo sapiens OX=9606 GN=EBNA1BP2 PE=1 SV=2	4	0.356219	0.481431	17.3922	12.8005	16.9965	17.1456	16.7688	16.713	16.7516	17.0314
	P55212	CASP6_HUMAN Caspase-6 OS=Homo sapiens OX=9606 GN=CASP6 PE=1 SV=2	4	0.356596	1.57434	14.2933	16.4899	14.6702	13.7204	14.1485	15.8623	14.7341	14.3925
	O00764	PDXK_HUMAN Pyridoxal kinase OS=Homo sapiens OX=9606 GN=PDXK PE=1 SV=1	7	0.356838	1.32821	16.5399	17.7966	16.7193	17.7479	17.9858	17.7467	18.0964	17.6881
	P31153	METK2_HUMAN S-adenosylmethionine synthase isoform type-2 OS=Homo sapiens OX=9606 GN=MAT2A PE=1 SV=1	7	0.35719	0.805666	18.6217	17.633	18.1522	18.2497	18.953	18.1937	17.6702	18.0737
	Q14697	GANAB_HUMAN Neutral alpha-glucosidase AB OS=Homo sapiens OX=9606 GN=GANAB PE=1 SV=3	35	0.357549	1.09108	20.3764	20.5057	20.098	20.6348	20.6735	20.5376	20.5092	20.4821
	O60684	IMA7_HUMAN Importin subunit alpha-7 OS=Homo sapiens OX=9606 GN=KPNA6 PE=1 SV=1;sp	4	0.358722	1.70632	17.0982	16.1109	16.2777	16.2479	14.7949	16.2462	13.6126	16.2619
	Q96JJ7	TMX3_HUMAN Protein disulfide-isomerase TMX3 OS=Homo sapiens OX=9606 GN=TMX3 PE=1 SV=2	8	0.359444	0.901508	17.1178	17.1812	17.6417	17.246	17.6867	17.5347	17.4844	17.3703
	Q16706	MA2A1_HUMAN Alpha-mannosidase 2 OS=Homo sapiens OX=9606 GN=MAN2A1 PE=1 SV=2	5	0.359479	0.601841	16.46	13.9314	15.8558	13.7176	13.7445	15.0788	15.2009	15.6032
	Q93052	LPP_HUMAN Lipoma-preferred partner OS=Homo sapiens OX=9606 GN=LPP PE=1 SV=1	7	0.360137	0.751379	17.5816	16.002	15.6261	16.0521	16.2938	15.874	16.3636	16.2874
	Q9Y285	SYFA_HUMAN Phenylalanine--tRNA ligase alpha subunit OS=Homo sapiens OX=9606 GN=FARSA PE=1 SV=3	13	0.360271	1.2431	16.9959	18.0197	17.9988	17.7502	17.7093	18.1714	18.356	18.3745
	O43815	STRN_HUMAN Striatin OS=Homo sapiens OX=9606 GN=STRN PE=1 SV=4	2	0.36164	0.590762	16.6253	14.167	16.2595	13.9053	14.3909	16.1467	15.9782	15.9974
	P46100	ATRX_HUMAN Transcriptional regulator ATRX OS=Homo sapiens OX=9606 GN=ATRX PE=1 SV=5	3	0.361705	0.852394	14.058	13.3235	13.7349	13.7656	14.2041	14.3384	14.1651	13.813
	Q9UI26	IPO11_HUMAN Importin-11 OS=Homo sapiens OX=9606 GN=IPO11 PE=1 SV=1	6	0.361891	0.948924	16.2938	16.1729	16.2019	16.3807	16.3099	16.2765	16.4353	16.1084
	P46781	RS9_HUMAN 40S ribosomal protein S9 OS=Homo sapiens OX=9606 GN=RPS9 PE=1 SV=3	5	0.361999	0.777902	18.0574	18.8277	18.9471	17.9962	19.6192	18.5288	18.8491	18.6706
	Q9UHY7	ENOPH_HUMAN Enolase-phosphatase E1 OS=Homo sapiens OX=9606 GN=ENOPH1 PE=1 SV=1	3	0.36204	0.8461	17.7475	17.679	17.0428	17.2098	17.3138	17.0332	17.5533	16.7711
	P11137	MTAP2_HUMAN Microtubule-associated protein 2 OS=Homo sapiens OX=9606 GN=MAP2 PE=1 SV=4	6	0.362253	1.71279	16.621	16.1701	15.5062	15.5429	14.0738	15.6457	13.1961	15.1436
	P49662	CASP4_HUMAN Caspase-4 OS=Homo sapiens OX=9606 GN=CASP4 PE=1 SV=1	2	0.362614	1.32613	15.6561	15.8062	14.7556	15.6241	16.1254	15.5742	14.3401	15.5014
	P17612	KAPCA_HUMAN cAMP-dependent protein kinase catalytic subunit alpha OS=Homo sapiens OX=9606 GN=PRKACA PE=1 SV=2	4	0.362638	0.933628	17.1406	17.2332	16.996	16.9973	17.1723	17.0935	17.3951	16.9836
	Q9Y617	SERC_HUMAN Phosphoserine aminotransferase OS=Homo sapiens OX=9606 GN=PSAT1 PE=1 SV=2	6	0.363024	0.860218	17.3467	17.3549	17.3697	17.1799	17.9615	17.4868	17.9992	17.7865
	P08574	CY1_HUMAN Cytochrome c1, heme protein, mitochondrial OS=Homo sapiens OX=9606 GN=CYC1 PE=1 SV=3	4	0.363496	0.874859	19.0992	18.8773	18.4452	18.3323	18.5519	18.6084	18.9672	18.4739
	Q9BRJ2	RM45_HUMAN 39S ribosomal protein L45, mitochondrial OS=Homo sapiens OX=9606 GN=MRPL45 PE=1 SV=2	4	0.364233	0.736659	16.0675	15.5202	14.7185	15.254	16.0232	15.5763	15.501	14.1959
	Q15942	ZYX_HUMAN Zyxin OS=Homo sapiens OX=9606 GN=ZYX PE=1 SV=1	14	0.365282	1.22804	18.5223	18.4272	18.5543	19.1784	19.2259	18.8993	17.9626	18.9457
	Q9Y508	RN114_HUMAN E3 ubiquitin-protein ligase RNF114 OS=Homo sapiens OX=9606 GN=RNF114 PE=1 SV=1	2	0.366573	0.929826	15.8736	15.5541	15.8201	15.8432	15.8196	16.0112	15.9621	15.6469
	Q15084	PDIA6_HUMAN Protein disulfide-isomerase A6 OS=Homo sapiens OX=9606 GN=PDIA6 PE=1 SV=1	13	0.366751	1.13319	20.1693	20.0634	20.5216	20.3691	19.8362	20.6463	20.1258	20.2956
	P48960	AGRE5_HUMAN Adhesion G protein-coupled receptor E5 OS=Homo sapiens OX=9606 GN=ADGRE5 PE=1 SV=4	6	0.367556	0.848623	17.6904	17.3851	17.7847	17.6206	17.263	17.5784	18.4096	17.6164
	P11177	ODPB_HUMAN Pyruvate dehydrogenase E1 component subunit beta, mitochondrial OS=Homo sapiens OX=9606 GN=PDHB PE=1 SV=3	9	0.367949	1.16236	18.8085	19.2117	19.2366	19.293	18.4416	19.2548	19.1305	18.7259
	P25325	THTM_HUMAN 3-mercaptopyruvate sulfurtransferase OS=Homo sapiens OX=9606 GN=MPST PE=1 SV=3	6	0.368054	1.66689	16.5971	15.6203	15.2597	15.5147	15.1443	16.2881	13.0377	15.5644
	P24941	CDK2_HUMAN Cyclin-dependent kinase 2 OS=Homo sapiens OX=9606 GN=CDK2 PE=1 SV=2;sp	5	0.368293	0.824006	15.6324	15.7076	16.4271	15.5907	15.4967	15.8423	16.6051	15.9036
	P54687	BCAT1_HUMAN Branched-chain-amino-acid aminotransferase, cytosolic OS=Homo sapiens OX=9606 GN=BCAT1 PE=1 SV=3	5	0.368857	1.30529	16.2874	16.3612	15.7818	16.091	16.1087	16.021	14.596	15.838
	Q9Y265	RUVB1_HUMAN RuvB-like 1 OS=Homo sapiens OX=9606 GN=RUVBL1 PE=1 SV=1	18	0.368864	0.909517	18.9784	19.1995	19.1943	18.8556	18.9222	19.0794	19.3541	18.7671
	P05976	MYL1_HUMAN Myosin light chain 1/3, skeletal muscle isoform OS=Homo sapiens OX=9606 GN=MYL1 PE=1 SV=3;sp	2	0.369554	0.484363	16.327	14.1739	14.4453	16.3407	18.6828	15.0343	17.1731	16.896
	P35637	FUS_HUMAN RNA-binding protein FUS OS=Homo sapiens OX=9606 GN=FUS PE=1 SV=1	6	0.369889	0.895304	19.6309	19.1283	19.0538	19.3966	19.7311	19.2816	19.4678	19.4389
	O60888	CUTA_HUMAN Protein CutA OS=Homo sapiens OX=9606 GN=CUTA PE=1 SV=2	3	0.370638	0.917242	17.7108	17.6579	17.8759	17.7814	18.2441	17.8251	17.8979	17.9658
	Q86XI2	CNDG2_HUMAN Condensin-2 complex subunit G2 OS=Homo sapiens OX=9606 GN=NCAPG2 PE=1 SV=1	3	0.371009	0.797839	14.1965	13.6903	13.0055	13.7424	13.5465	12.9332	14.042	13.1214
	Q96J01	THOC3_HUMAN THO complex subunit 3 OS=Homo sapiens OX=9606 GN=THOC3 PE=1 SV=1	4	0.371203	1.3306	14.695	15.4979	13.7113	14.7793	14.69	15.1855	15.6537	14.9354
	Q8N6H7	ARFG2_HUMAN ADP-ribosylation factor GTPase-activating protein 2 OS=Homo sapiens OX=9606 GN=ARFGAP2 PE=1 SV=1	3	0.37162	0.505017	17.0438	16.6214	16.5108	14.0986	14.1253	16.2403	16.7313	13.5085
	P53367	ARFP1_HUMAN Arfaptin-1 OS=Homo sapiens OX=9606 GN=ARFIP1 PE=1 SV=2	6	0.371889	0.841033	16.4306	15.4893	15.7254	15.8024	16.1821	16.2008	15.6105	15.457
	O43175	SERA_HUMAN D-3-phosphoglycerate dehydrogenase OS=Homo sapiens OX=9606 GN=PHGDH PE=1 SV=4	14	0.372007	1.14618	19.8122	19.734	20.1729	19.9226	19.3638	20.2766	19.6657	19.8686
	P02545	LMNA_HUMAN Prelamin-A/C OS=Homo sapiens OX=9606 GN=LMNA PE=1 SV=1	31	0.37213	1.07012	20.8896	21.0562	21.075	21.0669	21.106	21.1741	20.7417	20.9062
	Q9UNZ2	NSF1C_HUMAN NSFL1 cofactor p47 OS=Homo sapiens OX=9606 GN=NSFL1C PE=1 SV=2	10	0.37261	1.05499	18.6745	18.5512	18.4739	18.4906	18.574	18.6927	18.3805	18.6773
	Q7LBC6	KDM3B_HUMAN Lysine-specific demethylase 3B OS=Homo sapiens OX=9606 GN=KDM3B PE=1 SV=2;sp	2	0.373224	0.692843	15.3216	15.3331	16.0932	14.4476	15.216	13.7076	14.1071	15.132
	P42785	PCP_HUMAN Lysosomal Pro-X carboxypeptidase OS=Homo sapiens OX=9606 GN=PRCP PE=1 SV=1	6	0.374692	1.19998	16.0103	16.6244	17.1531	16.8468	16.4362	16.7611	16.789	17.2083
	Q9Y4L1	HYOU1_HUMAN Hypoxia up-regulated protein 1 OS=Homo sapiens OX=9606 GN=HYOU1 PE=1 SV=1	32	0.374842	1.1691	18.5297	19.1888	19.3077	19.1695	19.0871	19.5381	19.5351	19.4648
	P60033	CD81_HUMAN CD81 antigen OS=Homo sapiens OX=9606 GN=CD81 PE=1 SV=1	2	0.375043	1.15316	17.2685	17.5391	17.7732	17.3383	16.7656	17.527	17.3698	17.5952
	Q00587	BORG5_HUMAN Cdc42 effector protein 1 OS=Homo sapiens OX=9606 GN=CDC42EP1 PE=1 SV=1	4	0.375606	0.677131	16.3932	15.0655	16.8062	15.2669	14.8126	14.9744	14.432	14.8874
	P51812	KS6A3_HUMAN Ribosomal protein S6 kinase alpha-3 OS=Homo sapiens OX=9606 GN=RPS6KA3 PE=1 SV=1	7	0.377075	1.17234	17.0472	17.3215	17.3332	17.2637	16.3484	17.255	16.9936	16.7997
	P32119	PRDX2_HUMAN Peroxiredoxin-2 OS=Homo sapiens OX=9606 GN=PRDX2 PE=1 SV=5	6	0.377892	0.837934	19.0256	18.9214	18.7569	18.9551	19.7941	18.9177	18.7477	18.5099
	Q92538	GBF1_HUMAN Golgi-specific brefeldin A-resistance guanine nucleotide exchange factor 1 OS=Homo sapiens OX=9606 GN=GBF1 PE=1 SV=2	13	0.37922	0.856607	17.0411	16.035	16.4302	16.2829	16.2834	16.2545	15.9496	16.2387
	P48507	GSH0_HUMAN Glutamate--cysteine ligase regulatory subunit OS=Homo sapiens OX=9606 GN=GCLM PE=1 SV=1	5	0.379909	1.09078	18.4587	18.2212	17.8398	18.3116	18.1936	18.2394	18.0342	18.2556
	P62913	RL11_HUMAN 60S ribosomal protein L11 OS=Homo sapiens OX=9606 GN=RPL11 PE=1 SV=2	6	0.380853	1.25296	18.9821	18.3719	19.1885	19.0639	18.7243	19.4104	18.0937	19.4438
	Q15181	IPYR_HUMAN Inorganic pyrophosphatase OS=Homo sapiens OX=9606 GN=PPA1 PE=1 SV=2	16	0.381393	0.911226	18.9574	18.978	18.7881	18.9544	19.1294	18.8311	18.8756	18.4504
	P61289	PSME3_HUMAN Proteasome activator complex subunit 3 OS=Homo sapiens OX=9606 GN=PSME3 PE=1 SV=1	10	0.381452	0.779742	17.1261	17.8636	18.4567	17.4007	18.1863	17.6653	18.7131	18.1169
	Q04446	GLGB_HUMAN 1,4-alpha-glucan-branching enzyme OS=Homo sapiens OX=9606 GN=GBE1 PE=1 SV=3	20	0.382219	0.950243	19.5271	19.4075	19.2806	19.2334	19.4111	19.3115	19.2438	19.2156
	P36578	RL4_HUMAN 60S ribosomal protein L4 OS=Homo sapiens OX=9606 GN=RPL4 PE=1 SV=5	13	0.382373	1.12179	20.1626	20.7796	20.7405	20.6392	20.5978	20.8094	20.9574	20.8933
	Q9BQG0	MBB1A_HUMAN Myb-binding protein 1A OS=Homo sapiens OX=9606 GN=MYBBP1A PE=1 SV=2	29	0.383018	1.1893	17.3571	17.6622	17.7274	18.1398	17.0712	17.8111	18.2015	17.7445
	Q06203	PUR1_HUMAN Amidophosphoribosyltransferase OS=Homo sapiens OX=9606 GN=PPAT PE=1 SV=1	11	0.383619	0.852455	17.2434	17.079	16.8317	17.1237	17.6293	16.6085	16.7237	16.6956
	Q15057	ACAP2_HUMAN Arf-GAP with coiled-coil, ANK repeat and PH domain-containing protein 2 OS=Homo sapiens OX=9606 GN=ACAP2 PE=1 SV=3	3	0.384882	1.41653	14.1914	14.2725	15.9908	15.6974	14.726	15.6628	14.3609	15.6459
	Q9H0C8	ILKAP_HUMAN Integrin-linked kinase-associated serine/threonine phosphatase 2C OS=Homo sapiens OX=9606 GN=ILKAP PE=1 SV=1	4	0.385136	1.43184	14.8873	14.1634	15.7043	15.5863	13.703	15.7926	14.4887	15.3124
	P16930	FAAA_HUMAN Fumarylacetoacetase OS=Homo sapiens OX=9606 GN=FAH PE=1 SV=2	7	0.38532	1.46427	17.0805	17.0224	16.8846	17.2816	17.2009	16.7236	14.766	17.1052
	P62333	PRS10_HUMAN 26S proteasome regulatory subunit 10B OS=Homo sapiens OX=9606 GN=PSMC6 PE=1 SV=1	11	0.385406	1.12089	18.4382	19.0066	18.144	18.527	18.5959	18.3564	18.469	18.4157
	Q9GZZ9	UBA5_HUMAN Ubiquitin-like modifier-activating enzyme 5 OS=Homo sapiens OX=9606 GN=UBA5 PE=1 SV=1	2	0.385461	1.38461	16.2782	16.3091	15.3824	16.2718	16.4447	15.7095	14.3464	16.0394
	Q9GZT8	NIF3L_HUMAN NIF3-like protein 1 OS=Homo sapiens OX=9606 GN=NIF3L1 PE=1 SV=2	4	0.385549	1.2532	14.8208	16.2465	16.1679	16.0875	16.3111	16.2216	16.1046	16.1513
	Q9Y3P9	RBGP1_HUMAN Rab GTPase-activating protein 1 OS=Homo sapiens OX=9606 GN=RABGAP1 PE=1 SV=3	8	0.386557	0.611679	17.788	14.8905	17.145	16.6702	17.1891	16.6221	14.8956	15.9982
	Q13685	AAMP_HUMAN Angio-associated migratory cell protein OS=Homo sapiens OX=9606 GN=AAMP PE=1 SV=2	2	0.387199	0.80353	15.4348	13.8271	14.2516	14.4667	14.7852	14.6484	14.658	14.9251
	P03915	NU5M_HUMAN NADH-ubiquinone oxidoreductase chain 5 OS=Homo sapiens OX=9606 GN=MT-ND5 PE=1 SV=2	2	0.387728	0.839106	17.6989	16.9744	16.7958	16.8907	16.8487	16.4528	16.6019	16.615
	P04216	THY1_HUMAN Thy-1 membrane glycoprotein OS=Homo sapiens OX=9606 GN=THY1 PE=1 SV=2	3	0.388181	0.831861	19.8536	19.2472	19.3897	19.2411	18.8366	19.4521	20.1069	19.1839
	Q9NYL9	TMOD3_HUMAN Tropomodulin-3 OS=Homo sapiens OX=9606 GN=TMOD3 PE=1 SV=1	9	0.388922	0.840663	18.2787	17.5979	17.5462	17.6391	17.2817	17.7821	18.2779	17.3638
	Q15008	PSMD6_HUMAN 26S proteasome non-ATPase regulatory subunit 6 OS=Homo sapiens OX=9606 GN=PSMD6 PE=1 SV=1	9	0.388996	0.9014	19.9759	19.8673	19.5937	19.5285	19.7768	19.3273	19.4501	19.4744
	Q6ZUT6	CCD9B_HUMAN Coiled-coil domain-containing protein 9B OS=Homo sapiens OX=9606 GN=CCDC9B PE=1 SV=1	4	0.389168	1.46768	14.51	14.5233	13.3586	15.293	16.0642	15.1848	14.2612	15.4071
	Q07065	CKAP4_HUMAN Cytoskeleton-associated protein 4 OS=Homo sapiens OX=9606 GN=CKAP4 PE=1 SV=2	23	0.390889	1.04553	19.7168	19.5729	19.6252	19.6713	19.4151	19.6412	19.5044	19.633
	Q9NVX2	NLE1_HUMAN Notchless protein homolog 1 OS=Homo sapiens OX=9606 GN=NLE1 PE=1 SV=4	4	0.391105	1.27838	15.6082	15.1566	14.0495	15.4168	15.4653	15.1411	14.491	15.3168
	P62760	VISL1_HUMAN Visinin-like protein 1 OS=Homo sapiens OX=9606 GN=VSNL1 PE=1 SV=2	3	0.391507	1.44224	15.813	14.9238	15.6492	15.9102	15.7472	16.2279	13.7689	16.0296
	O00170	AIP_HUMAN AH receptor-interacting protein OS=Homo sapiens OX=9606 GN=AIP PE=1 SV=2	6	0.392198	0.798172	17.1067	16.7367	16.0261	16.5958	16.9658	16.0346	16.2921	15.7225
	P24752	THIL_HUMAN Acetyl-CoA acetyltransferase, mitochondrial OS=Homo sapiens OX=9606 GN=ACAT1 PE=1 SV=1	11	0.392594	1.22553	17.3174	18.1024	18.542	18.2214	17.8602	18.5343	18.5413	18.5765
	O95674	CDS2_HUMAN Phosphatidate cytidylyltransferase 2 OS=Homo sapiens OX=9606 GN=CDS2 PE=1 SV=1	3	0.393018	1.34129	15.0476	14.645	15.9167	15.6172	14.0885	15.489	14.3847	15.3809
	P11216	PYGB_HUMAN Glycogen phosphorylase, brain form OS=Homo sapiens OX=9606 GN=PYGB PE=1 SV=5	26	0.39319	1.03374	18.9662	18.9643	19.0656	19.1311	18.9053	19.0091	18.9424	18.9664
	A5YKK6	CNOT1_HUMAN CCR4-NOT transcription complex subunit 1 OS=Homo sapiens OX=9606 GN=CNOT1 PE=1 SV=2	10	0.393582	1.63733	16.0624	16.4153	16.9815	16.3866	16.6036	17.0372	13.6256	16.2793
	Q08945	SSRP1_HUMAN FACT complex subunit SSRP1 OS=Homo sapiens OX=9606 GN=SSRP1 PE=1 SV=1	9	0.393769	1.45504	16.4917	16.1452	17.9971	17.6879	16.1333	17.9235	16.897	17.9268
	Q6P1N9	TATD1_HUMAN Putative deoxyribonuclease TATDN1 OS=Homo sapiens OX=9606 GN=TATDN1 PE=1 SV=2	5	0.393995	0.621317	16.4906	13.3985	16.3487	16.2148	16.3257	16.6253	15.9386	16.1187
	O15446	RPA34_HUMAN DNA-directed RNA polymerase I subunit RPA34 OS=Homo sapiens OX=9606 GN=CD3EAP PE=1 SV=1	2	0.394124	0.79133	16.8895	16.3685	16.3363	16.5836	17.7464	16.4667	16.1161	16.3189
	Q96RP9	EFGM_HUMAN Elongation factor G, mitochondrial OS=Homo sapiens OX=9606 GN=GFM1 PE=1 SV=2	6	0.394197	0.571893	16.6244	15.9572	16.4791	15.6171	16.7773	15.191	13.768	13.6588
	Q08AF3	SLFN5_HUMAN Schlafen family member 5 OS=Homo sapiens OX=9606 GN=SLFN5 PE=1 SV=1	5	0.394636	1.29576	16.3198	16.2753	15.9202	16.2529	16.3606	16.1757	14.6344	16.0264
	O75223	GGCT_HUMAN Gamma-glutamylcyclotransferase OS=Homo sapiens OX=9606 GN=GGCT PE=1 SV=1	3	0.394666	1.62231	13.9056	16.6605	15.9902	16.5404	17.2603	15.8965	14.8563	15.7071
	Q8IWV7	UBR1_HUMAN E3 ubiquitin-protein ligase UBR1 OS=Homo sapiens OX=9606 GN=UBR1 PE=1 SV=1	7	0.394861	1.48808	13.8791	14.5105	15.8715	15.0155	13.1069	15.0996	14.8507	15.3765
	Q9NPH0	PPA6_HUMAN Lysophosphatidic acid phosphatase type 6 OS=Homo sapiens OX=9606 GN=ACP6 PE=1 SV=3	3	0.395878	0.645676	16.135	13.9603	14.6783	13.821	14.579	14.1644	12.7956	13.7177
	Q6RFH5	WDR74_HUMAN WD repeat-containing protein 74 OS=Homo sapiens OX=9606 GN=WDR74 PE=1 SV=1	5	0.396484	1.54982	15.8765	16.1143	16.5356	15.5987	15.2476	15.8978	13.3605	15.9379
	Q8TDN6	BRX1_HUMAN Ribosome biogenesis protein BRX1 homolog OS=Homo sapiens OX=9606 GN=BRIX1 PE=1 SV=2	8	0.396826	1.24093	17.3739	17.0581	16.887	17.1644	16.979	16.992	15.7892	17.0603
	Q15120	PDK3_HUMAN [Pyruvate dehydrogenase (acetyl-transferring)] kinase isozyme 3, mitochondrial OS=Homo sapiens OX=9606 GN=PDK3 PE=1 SV=1	2	0.396845	0.664879	15.506	14.1387	15.8681	14.7079	15.3995	13.9568	13.1786	14.7934
	P78362	SRPK2_HUMAN SRSF protein kinase 2 OS=Homo sapiens OX=9606 GN=SRPK2 PE=1 SV=3	2	0.397359	0.753351	14.2819	14.4005	14.9187	13.8037	13.3837	14.3733	15.0712	13.4435
	Q13423	NNTM_HUMAN NAD(P) transhydrogenase, mitochondrial OS=Homo sapiens OX=9606 GN=NNT PE=1 SV=3	8	0.397372	1.0927	16.8172	17.2462	17.0918	17.2534	16.9247	17.0785	17.4325	17.1997
	Q9H8S9	MOB1A_HUMAN MOB kinase activator 1A OS=Homo sapiens OX=9606 GN=MOB1A PE=1 SV=4;sp	5	0.398768	1.35659	16.002	17.6044	18.3137	17.5411	17.3249	17.7449	17.4256	17.9357
	Q99575	POP1_HUMAN Ribonucleases P/MRP protein subunit POP1 OS=Homo sapiens OX=9606 GN=POP1 PE=1 SV=2	10	0.398942	1.09305	16.302	16.1205	16.4052	16.3973	16.4151	16.5631	16.0054	16.5604
	Q8N1G4	LRC47_HUMAN Leucine-rich repeat-containing protein 47 OS=Homo sapiens OX=9606 GN=LRRC47 PE=1 SV=1	12	0.399113	1.16637	17.4175	17.841	18.4281	17.8142	17.6384	18.13	17.5358	18.1227
	Q15758	AAAT_HUMAN Neutral amino acid transporter B(0) OS=Homo sapiens OX=9606 GN=SLC1A5 PE=1 SV=2	6	0.399994	1.36058	17.1302	18.6753	18.8463	18.0136	17.4587	18.539	18.8676	18.8518
	O60547	GMDS_HUMAN GDP-mannose 4,6 dehydratase OS=Homo sapiens OX=9606 GN=GMDS PE=1 SV=1	3	0.400663	1.3096	15.3361	15.4646	16.8189	16.2455	15.609	16.3764	15.4545	16.6885
	Q9NXG2	THUM1_HUMAN THUMP domain-containing protein 1 OS=Homo sapiens OX=9606 GN=THUMPD1 PE=1 SV=2	2	0.400712	0.832443	15.1072	14.8963	15.8861	14.9625	14.6098	15.1168	15.634	15.2032
	P49916	DNLI3_HUMAN DNA ligase 3 OS=Homo sapiens OX=9606 GN=LIG3 PE=1 SV=2	5	0.401207	1.2957	15.2273	14.3595	14.5954	15.4185	15.179	15.5967	13.9021	15.0241
	P28074	PSB5_HUMAN Proteasome subunit beta type-5 OS=Homo sapiens OX=9606 GN=PSMB5 PE=1 SV=3	6	0.401559	1.13336	18.4293	18.7236	19.0153	19.1574	19.1782	19.2745	18.9033	19.0931
	P55735	SEC13_HUMAN Protein SEC13 homolog OS=Homo sapiens OX=9606 GN=SEC13 PE=1 SV=3	8	0.401671	0.804533	20.2091	19.4711	18.792	19.1561	19.136	19.2134	19.938	18.9795
	P46459	NSF_HUMAN Vesicle-fusing ATPase OS=Homo sapiens OX=9606 GN=NSF PE=1 SV=3	16	0.401945	1.1395	19.5805	19.8468	19.3979	19.5821	19.4502	19.1738	18.8746	19.454
	O96008	TOM40_HUMAN Mitochondrial import receptor subunit TOM40 homolog OS=Homo sapiens OX=9606 GN=TOMM40 PE=1 SV=1	4	0.402003	1.45776	16.4398	17.7455	18.7321	18.3356	17.1099	18.5036	18.6785	18.5506
	O75083	WDR1_HUMAN WD repeat-containing protein 1 OS=Homo sapiens OX=9606 GN=WDR1 PE=1 SV=4	20	0.403286	1.14221	19.5794	19.9094	19.0932	19.8912	19.9232	19.5259	19.392	19.4286
	P07203	GPX1_HUMAN Glutathione peroxidase 1 OS=Homo sapiens OX=9606 GN=GPX1 PE=1 SV=4	4	0.403769	0.874067	17.8018	17.6496	18.1416	17.4466	18.1877	18.3554	17.8936	17.7965
	Q96DI7	SNR40_HUMAN U5 small nuclear ribonucleoprotein 40 kDa protein OS=Homo sapiens OX=9606 GN=SNRNP40 PE=1 SV=1	6	0.404505	1.3299	14.9153	16.3188	17.0368	16.5788	15.7779	16.6088	16.2321	16.101
	P14868	SYDC_HUMAN Aspartate--tRNA ligase, cytoplasmic OS=Homo sapiens OX=9606 GN=DARS1 PE=1 SV=2	14	0.404581	1.08449	18.9858	18.8762	18.4893	19.1083	18.949	18.8681	18.7771	18.8168
	Q16775	GLO2_HUMAN Hydroxyacylglutathione hydrolase, mitochondrial OS=Homo sapiens OX=9606 GN=HAGH PE=1 SV=2	3	0.404599	0.742981	16.3748	14.31	16.1133	15.8412	15.1122	15.8135	16.0324	15.9536
	Q8NHP6	MSPD2_HUMAN Motile sperm domain-containing protein 2 OS=Homo sapiens OX=9606 GN=MOSPD2 PE=1 SV=1	3	0.405718	0.754267	14.5962	13.0367	15.1471	14.7379	14.6905	14.5494	14.0458	14.5283
	P50583	AP4A_HUMAN Bis(5-nucleosyl)-tetraphosphatase [asymmetrical] OS=Homo sapiens OX=9606 GN=NUDT2 PE=1 SV=3	2	0.406931	1.13742	16.7269	17.2136	16.7095	16.6311	16.2893	17.0161	16.9648	16.5728
	Q01433	AMPD2_HUMAN AMP deaminase 2 OS=Homo sapiens OX=9606 GN=AMPD2 PE=1 SV=2	7	0.40721	1.08324	17.2071	17.1482	17.1135	17.0566	16.7931	16.9824	16.6859	17.0739
	P62249	RS16_HUMAN 40S ribosomal protein S16 OS=Homo sapiens OX=9606 GN=RPS16 PE=1 SV=2	6	0.407474	0.84932	17.7313	18.1517	18.3031	17.5973	18.1199	18.1936	18.8171	18.0865
	P54920	SNAA_HUMAN Alpha-soluble NSF attachment protein OS=Homo sapiens OX=9606 GN=NAPA PE=1 SV=3	13	0.409006	0.899886	18.5286	18.0248	17.9682	18.2004	18.1117	17.9621	17.9079	17.7204
	Q12797	ASPH_HUMAN Aspartyl/asparaginyl beta-hydroxylase OS=Homo sapiens OX=9606 GN=ASPH PE=1 SV=3	15	0.40907	0.80341	18.5699	18.0336	17.5586	18.1101	19.0954	17.7025	17.8867	18.0012
	O94925	GLSK_HUMAN Glutaminase kidney isoform, mitochondrial OS=Homo sapiens OX=9606 GN=GLS PE=1 SV=1	17	0.409087	1.10141	18.0246	18.0624	17.8175	18.2984	18.4614	18.132	17.8467	18.2148
	P62266	RS23_HUMAN 40S ribosomal protein S23 OS=Homo sapiens OX=9606 GN=RPS23 PE=1 SV=3	4	0.409389	1.55062	14.2507	15.7185	16.333	16.2973	17.2808	17.1865	15.6351	16.8287
	Q8IZP0	ABI1_HUMAN Abl interactor 1 OS=Homo sapiens OX=9606 GN=ABI1 PE=1 SV=4	4	0.410041	0.7179	14.3487	13.8079	14.9946	14.7434	16.237	14.5703	15.0661	15.6122
	O75533	SF3B1_HUMAN Splicing factor 3B subunit 1 OS=Homo sapiens OX=9606 GN=SF3B1 PE=1 SV=3	25	0.410386	0.909002	18.3235	17.8672	18.1518	17.9154	18.057	17.8575	17.601	17.9425
	P51808	DYLT3_HUMAN Dynein light chain Tctex-type 3 OS=Homo sapiens OX=9606 GN=DYNLT3 PE=1 SV=1	2	0.410725	0.900032	16.6155	16.2195	16.1166	16.5103	16.6843	16.005	16.3248	16.3985
	Q7Z3U7	MON2_HUMAN Protein MON2 homolog OS=Homo sapiens OX=9606 GN=MON2 PE=1 SV=3	2	0.411198	1.28244	15.629	15.4607	15.3528	15.3091	15.0134	15.2249	13.8012	15.2373
	P82675	RT05_HUMAN 28S ribosomal protein S5, mitochondrial OS=Homo sapiens OX=9606 GN=MRPS5 PE=1 SV=2	2	0.41199	1.67848	15.8684	13.8519	13.5024	15.6436	15.7414	15.986	13.5113	16.1307
	P55145	MANF_HUMAN Mesencephalic astrocyte-derived neurotrophic factor OS=Homo sapiens OX=9606 GN=MANF PE=1 SV=3	4	0.412122	1.40024	17.4896	16.9417	18.6218	18.2248	16.5354	18.3927	17.1232	18.1535
	Q96FX7	TRM61_HUMAN tRNA (adenine(58)-N(1))-methyltransferase catalytic subunit TRMT61A OS=Homo sapiens OX=9606 GN=TRMT61A PE=1 SV=1	2	0.412647	0.778334	13.5991	14.1459	14.0723	14.33	15.2703	13.5844	14.0738	13.5091
	P18858	DNLI1_HUMAN DNA ligase 1 OS=Homo sapiens OX=9606 GN=LIG1 PE=1 SV=1	4	0.412686	1.31758	15.8378	14.696	14.4048	14.902	14.0069	15.4238	14.1052	14.9243
	Q07812	BAX_HUMAN Apoptosis regulator BAX OS=Homo sapiens OX=9606 GN=BAX PE=1 SV=1	5	0.413034	1.29933	16.9362	16.9991	16.4628	16.941	16.6482	16.7068	15.2122	16.1235
	Q8IYB8	SUV3_HUMAN ATP-dependent RNA helicase SUPV3L1, mitochondrial OS=Homo sapiens OX=9606 GN=SUPV3L1 PE=1 SV=1	3	0.413073	1.27237	15.6025	15.5824	15.1598	15.2369	15.4651	15.3851	13.9009	15.314
	P35998	PRS7_HUMAN 26S proteasome regulatory subunit 7 OS=Homo sapiens OX=9606 GN=PSMC2 PE=1 SV=3	14	0.4132	0.967246	18.734	18.7385	18.8879	18.876	18.8482	18.8378	18.8679	18.6935
	Q53GS9	SNUT2_HUMAN U4/U6.U5 tri-snRNP-associated protein 2 OS=Homo sapiens OX=9606 GN=USP39 PE=1 SV=2	7	0.413277	1.55894	16.8267	15.1166	14.6213	16.2202	16.2985	16.7277	14.1876	16.4319
	A8CG34	P121C_HUMAN Nuclear envelope pore membrane protein POM 121C OS=Homo sapiens OX=9606 GN=POM121C PE=1 SV=3	1	0.414243	1.74968	14.1011	16.2857	14.2128	16.1522	16.2713	16.3811	14.2514	13.246
	O60841	IF2P_HUMAN Eukaryotic translation initiation factor 5B OS=Homo sapiens OX=9606 GN=EIF5B PE=1 SV=4	20	0.414579	0.851635	18.3421	17.8698	17.4679	17.7867	18.3706	17.3877	17.5842	17.7938
	P61020	RAB5B_HUMAN Ras-related protein Rab-5B OS=Homo sapiens OX=9606 GN=RAB5B PE=1 SV=1	2	0.415242	1.31625	15.6666	16.1687	15.8998	15.4672	14.2917	15.8928	16.2119	16.1269
	Q12905	ILF2_HUMAN Interleukin enhancer-binding factor 2 OS=Homo sapiens OX=9606 GN=ILF2 PE=1 SV=2	8	0.415557	1.16404	18.3859	18.9595	19.2122	19.1626	19.0056	19.4665	19.4349	19.3266
	P42167	LAP2B_HUMAN Lamina-associated polypeptide 2, isoforms beta/gamma OS=Homo sapiens OX=9606 GN=TMPO PE=1 SV=2	3	0.415621	1.13062	17.9047	17.7923	18.055	17.6729	17.2373	18.085	17.5718	17.9272
	P51610	HCFC1_HUMAN Host cell factor 1 OS=Homo sapiens OX=9606 GN=HCFC1 PE=1 SV=2	14	0.415812	0.858642	17.868	17.1962	17.5315	17.489	17.9088	17.3416	16.856	17.2581
	P63010	AP2B1_HUMAN AP-2 complex subunit beta OS=Homo sapiens OX=9606 GN=AP2B1 PE=1 SV=1	12	0.417127	0.932108	18.1355	18.2929	18.1611	17.9166	18.1815	17.8498	17.9224	17.9354
	Q8WZA9	IRGQ_HUMAN Immunity-related GTPase family Q protein OS=Homo sapiens OX=9606 GN=IRGQ PE=1 SV=1	2	0.417775	0.506418	17.4608	18.0453	17.5391	13.1322	17.1425	17.4281	17.6352	17.2457
	O43809	CPSF5_HUMAN Cleavage and polyadenylation specificity factor subunit 5 OS=Homo sapiens OX=9606 GN=NUDT21 PE=1 SV=1	9	0.418424	1.0529	18.365	18.3794	18.3004	18.3092	18.0717	18.308	18.1146	18.1524
	Q14847	LASP1_HUMAN LIM and SH3 domain protein 1 OS=Homo sapiens OX=9606 GN=LASP1 PE=1 SV=2	9	0.418597	1.35035	17.8022	16.7906	16.1155	17.5882	17.5034	17.4731	15.9875	17.2901
	Q9BRJ6	CG050_HUMAN Uncharacterized protein C7orf50 OS=Homo sapiens OX=9606 GN=C7orf50 PE=1 SV=1	4	0.419332	1.08711	16.653	16.4984	16.3418	16.592	16.0197	16.4176	16.4805	16.4689
	P62256	UBE2H_HUMAN Ubiquitin-conjugating enzyme E2 H OS=Homo sapiens OX=9606 GN=UBE2H PE=1 SV=1	3	0.42043	1.08511	18.0509	18.5897	18.3982	18.295	18.0999	18.3224	18.5438	18.357
	Q6PL18	ATAD2_HUMAN ATPase family AAA domain-containing protein 2 OS=Homo sapiens OX=9606 GN=ATAD2 PE=1 SV=1	4	0.42104	0.712091	14.6048	14.1649	12.7213	13.4668	14.8575	14.1809	14.8024	13.214
	P12235	ADT1_HUMAN ADP/ATP translocase 1 OS=Homo sapiens OX=9606 GN=SLC25A4 PE=1 SV=4	1	0.421686	1.45347	16.4077	16.13	13.7999	16.313	16.05	16.1988	16.3718	16.1457
	P19388	RPAB1_HUMAN DNA-directed RNA polymerases I, II, and III subunit RPABC1 OS=Homo sapiens OX=9606 GN=POLR2E PE=1 SV=4	2	0.421892	1.34695	14.3965	16.3312	16.5791	15.9003	15.6839	16.1868	16.337	16.2971
	P04049	RAF1_HUMAN RAF proto-oncogene serine/threonine-protein kinase OS=Homo sapiens OX=9606 GN=RAF1 PE=1 SV=1	2	0.422308	0.795941	14.8588	14.6015	14.4317	14.0496	15.2033	13.798	13.6276	14.3553
	P54709	AT1B3_HUMAN Sodium/potassium-transporting ATPase subunit beta-3 OS=Homo sapiens OX=9606 GN=ATP1B3 PE=1 SV=1	7	0.422485	1.22736	18.9156	19.071	19.7022	19.3652	18.4835	19.6177	19.6545	19.8841
	Q96A26	F162A_HUMAN Protein FAM162A OS=Homo sapiens OX=9606 GN=FAM162A PE=1 SV=2	3	0.423118	0.854526	17.6031	16.7937	17.525	17.7439	17.2288	16.912	17.6544	17.6545
	O43169	CYB5B_HUMAN Cytochrome b5 type B OS=Homo sapiens OX=9606 GN=CYB5B PE=1 SV=3	5	0.423562	1.14553	18.1748	18.6494	18.2372	18.1045	18.1877	18.0954	17.4943	18.0286
	Q13492	PICAL_HUMAN Phosphatidylinositol-binding clathrin assembly protein OS=Homo sapiens OX=9606 GN=PICALM PE=1 SV=2	10	0.423706	1.3407	16.2212	17.4572	18.1312	17.8342	17.4266	18.4509	18.1093	17.8379
	P17655	CAN2_HUMAN Calpain-2 catalytic subunit OS=Homo sapiens OX=9606 GN=CAPN2 PE=1 SV=6	16	0.423827	1.10965	18.8771	18.8582	18.3248	18.6006	18.6915	18.4886	18.2192	18.7657
	Q6P2E9	EDC4_HUMAN Enhancer of mRNA-decapping protein 4 OS=Homo sapiens OX=9606 GN=EDC4 PE=1 SV=1	18	0.424388	0.853656	18.1522	17.7148	17.3527	17.4002	17.8521	17.2101	17.096	17.2148
	Q9NUQ7	UFSP2_HUMAN Ufm1-specific protease 2 OS=Homo sapiens OX=9606 GN=UFSP2 PE=1 SV=3	3	0.424718	1.45812	16.274	15.9044	15.7136	15.5562	14.6382	15.6468	13.4798	15.1747
	Q9GZS1	RPA49_HUMAN DNA-directed RNA polymerase I subunit RPA49 OS=Homo sapiens OX=9606 GN=POLR1E PE=1 SV=3	2	0.424809	0.891162	13.9681	13.9863	14.443	13.9473	14.3578	13.7238	13.6978	14.1444
	P49589	SYCC_HUMAN Cysteine--tRNA ligase, cytoplasmic OS=Homo sapiens OX=9606 GN=CARS1 PE=1 SV=3	7	0.425995	1.10385	17.4169	17.2254	16.8089	17.0704	17.0441	17.0355	16.6895	17.1982
	Q92783	STAM1_HUMAN Signal transducing adapter molecule 1 OS=Homo sapiens OX=9606 GN=STAM PE=1 SV=3	2	0.426093	1.71712	17.3853	16.9251	13.6415	16.0559	14.7639	15.9829	16.8599	16.8068
	O94973	AP2A2_HUMAN AP-2 complex subunit alpha-2 OS=Homo sapiens OX=9606 GN=AP2A2 PE=1 SV=2	10	0.426509	1.10542	16.3049	16.681	16.9627	16.4887	16.4518	16.6893	16.253	16.6918
	P62847	RS24_HUMAN 40S ribosomal protein S24 OS=Homo sapiens OX=9606 GN=RPS24 PE=1 SV=1	4	0.426512	1.15792	18.7513	19.0911	19.6086	19.3403	18.5739	19.4271	19.2493	19.1708
	Q15907	RB11B_HUMAN Ras-related protein Rab-11B OS=Homo sapiens OX=9606 GN=RAB11B PE=1 SV=4	1	0.427156	1.11186	18.7832	19.0518	18.6029	19.2211	19.4153	19.0355	18.986	19.0909
	Q15746	MYLK_HUMAN Myosin light chain kinase, smooth muscle OS=Homo sapiens OX=9606 GN=MYLK PE=1 SV=4	10	0.42722	1.17327	17.1898	16.9295	16.1354	17.1912	17.1106	17.0266	17.1465	17.3572
	P15586	GNS_HUMAN N-acetylglucosamine-6-sulfatase OS=Homo sapiens OX=9606 GN=GNS PE=1 SV=3	5	0.427735	0.771239	17.5295	16.9694	17.2181	16.8593	16.3209	16.2375	16.2017	15.705
	Q8N9N8	EIF1A_HUMAN Probable RNA-binding protein EIF1AD OS=Homo sapiens OX=9606 GN=EIF1AD PE=1 SV=1	2	0.428005	1.18895	15.815	15.8065	16.3197	15.9442	15.7763	16.205	14.9595	15.9135
	O76054	S14L2_HUMAN SEC14-like protein 2 OS=Homo sapiens OX=9606 GN=SEC14L2 PE=1 SV=1	6	0.428184	0.733484	16.1032	14.3182	16.7201	16.1276	15.4267	16.2977	16.1771	15.8951
	P18124	RL7_HUMAN 60S ribosomal protein L7 OS=Homo sapiens OX=9606 GN=RPL7 PE=1 SV=1	8	0.428625	0.86833	20.472	19.4928	20.2174	20.1021	20.4583	20.2468	19.9922	20.4835
	P18669	PGAM1_HUMAN Phosphoglycerate mutase 1 OS=Homo sapiens OX=9606 GN=PGAM1 PE=1 SV=2	16	0.429546	1.0996	20.6406	21.2209	21.2845	21.2701	21.2839	21.034	20.9838	21.2157
	Q9H2U1	DHX36_HUMAN ATP-dependent DNA/RNA helicase DHX36 OS=Homo sapiens OX=9606 GN=DHX36 PE=1 SV=2	6	0.429756	0.642817	15.2429	15.4389	14.7101	13.3706	16.5369	14.6201	13.5786	14.0889
	Q12904	AIMP1_HUMAN Aminoacyl tRNA synthase complex-interacting multifunctional protein 1 OS=Homo sapiens OX=9606 GN=AIMP1 PE=1 SV=2	7	0.431265	1.08046	18.154	18.1836	18.088	17.954	17.6867	17.9617	17.7246	18.0007
	Q9H488	OFUT1_HUMAN GDP-fucose protein O-fucosyltransferase 1 OS=Homo sapiens OX=9606 GN=POFUT1 PE=1 SV=1	3	0.433372	1.51479	15.5081	16.6345	13.8713	16.4491	16.0261	16.0973	15.7124	14.3335
	O95817	BAG3_HUMAN BAG family molecular chaperone regulator 3 OS=Homo sapiens OX=9606 GN=BAG3 PE=1 SV=3	20	0.433946	0.93564	18.0927	17.7016	17.8156	17.7006	17.6652	17.9899	17.9294	17.7269
	P31350	RIR2_HUMAN Ribonucleoside-diphosphate reductase subunit M2 OS=Homo sapiens OX=9606 GN=RRM2 PE=1 SV=1	7	0.433972	1.19005	16.8662	16.8402	17.0774	16.6385	15.8126	17.1709	16.6899	16.8006
	Q16831	UPP1_HUMAN Uridine phosphorylase 1 OS=Homo sapiens OX=9606 GN=UPP1 PE=1 SV=1	4	0.434161	0.451557	15.0821	13.7227	17.8162	17.6033	15.6456	13.7323	18.5041	17.4015
	Q99798	ACON_HUMAN Aconitate hydratase, mitochondrial OS=Homo sapiens OX=9606 GN=ACO2 PE=1 SV=2	17	0.436104	0.951958	18.0664	17.8025	17.7175	17.906	17.7975	17.7669	17.8943	17.7162
	Q9HB07	MYG1_HUMAN UPF0160 protein MYG1, mitochondrial OS=Homo sapiens OX=9606 GN=C12orf10 PE=1 SV=2	6	0.436362	0.820768	17.869	16.8428	16.9508	16.963	17.1213	16.8083	16.2857	16.473
	Q15363	TMED2_HUMAN Transmembrane emp24 domain-containing protein 2 OS=Homo sapiens OX=9606 GN=TMED2 PE=1 SV=1	4	0.437496	1.36457	16.6284	18.3408	18.8459	18.5615	18.1488	18.6924	18.921	18.7432
	P09936	UCHL1_HUMAN Ubiquitin carboxyl-terminal hydrolase isozyme L1 OS=Homo sapiens OX=9606 GN=UCHL1 PE=1 SV=2	11	0.438244	1.07784	22.5282	22.592	22.7966	22.5709	22.3755	22.8222	22.32	22.4677
	Q8WUM4	PDC6I_HUMAN Programmed cell death 6-interacting protein OS=Homo sapiens OX=9606 GN=PDCD6IP PE=1 SV=1	17	0.439225	1.14976	17.4142	18.0161	18.4375	17.972	18.1297	18.4384	17.9628	18.323
	Q9BRR6	ADPGK_HUMAN ADP-dependent glucokinase OS=Homo sapiens OX=9606 GN=ADPGK PE=1 SV=1	5	0.439568	1.6064	15.6722	16.4582	16.5203	16.0044	16.3738	16.2252	13.041	15.6549
	O60879	DIAP2_HUMAN Protein diaphanous homolog 2 OS=Homo sapiens OX=9606 GN=DIAPH2 PE=1 SV=1	4	0.439694	0.796182	14.9415	15.1327	15.1591	13.5607	15.1029	15.1951	15.0837	15.0832
	O75907	DGAT1_HUMAN Diacylglycerol O-acyltransferase 1 OS=Homo sapiens OX=9606 GN=DGAT1 PE=1 SV=2	2	0.440925	0.688103	14.6509	14.8976	14.0639	14.5945	16.9796	14.6939	14.8455	14.1968
	P31942	HNRH3_HUMAN Heterogeneous nuclear ribonucleoprotein H3 OS=Homo sapiens OX=9606 GN=HNRNPH3 PE=1 SV=2	9	0.441073	0.713328	17.887	16.8994	17.2385	17.4825	19.6209	18.0067	17.5806	17.989
	Q8TCT9	HM13_HUMAN Minor histocompatibility antigen H13 OS=Homo sapiens OX=9606 GN=HM13 PE=1 SV=1	2	0.44121	1.79041	16.8522	16.4442	16.7132	15.8027	12.6528	16.518	16.142	16.9564
	Q9P035	HACD3_HUMAN Very-long-chain (3R)-3-hydroxyacyl-CoA dehydratase 3 OS=Homo sapiens OX=9606 GN=HACD3 PE=1 SV=2	6	0.441245	1.18725	19.4755	19.2508	19.1106	19.1157	19.2726	19.2749	18.1386	19.3464
	O75718	CRTAP_HUMAN Cartilage-associated protein OS=Homo sapiens OX=9606 GN=CRTAP PE=1 SV=1	6	0.442009	0.696616	15.0504	14.0212	14.2088	14.8229	16.1163	13.9937	13.3458	13.7973
	Q9H3P7	GCP60_HUMAN Golgi resident protein GCP60 OS=Homo sapiens OX=9606 GN=ACBD3 PE=1 SV=4	8	0.442578	0.805278	18.9974	17.4518	17.4752	17.7182	18.1929	17.7656	17.4374	17.9176
	P07814	SYEP_HUMAN Bifunctional glutamate/proline--tRNA ligase OS=Homo sapiens OX=9606 GN=EPRS1 PE=1 SV=5	38	0.443256	1.09068	18.1687	18.4197	17.9877	18.1249	18.348	18.1075	17.7352	18.0884
	P30837	AL1B1_HUMAN Aldehyde dehydrogenase X, mitochondrial OS=Homo sapiens OX=9606 GN=ALDH1B1 PE=1 SV=3	5	0.443372	1.58423	16.2555	14.3839	13.8729	15.7524	15.6277	15.7492	13.0981	15.6238
	Q15642	CIP4_HUMAN Cdc42-interacting protein 4 OS=Homo sapiens OX=9606 GN=TRIP10 PE=1 SV=3	4	0.444846	1.46888	17.1435	16.682	14.8639	16.4654	16.4054	15.6033	14.4392	16.3202
	P08962	CD63_HUMAN CD63 antigen OS=Homo sapiens OX=9606 GN=CD63 PE=1 SV=2	2	0.446067	0.67389	15.1103	15.0483	13.9669	14.2721	16.5893	14.3955	13.9032	13.5761
	P35232	PHB_HUMAN Prohibitin OS=Homo sapiens OX=9606 GN=PHB PE=1 SV=1	10	0.446104	0.958857	19.3053	19.2949	19.0739	19.0583	19.2772	19.2126	19.2845	19.1327
	Q13190	STX5_HUMAN Syntaxin-5 OS=Homo sapiens OX=9606 GN=STX5 PE=1 SV=2	3	0.446259	0.648293	16.4924	13.979	14.1299	16.379	16.456	14.5313	15.1416	14.8295
	Q9UHD8	SEPT9_HUMAN Septin-9 OS=Homo sapiens OX=9606 GN=SEPTIN9 PE=1 SV=2	16	0.446395	0.853914	18.7745	18.7599	18.7484	18.8032	19.781	18.5594	18.5938	18.8638
	O75312	ZPR1_HUMAN Zinc finger protein ZPR1 OS=Homo sapiens OX=9606 GN=ZPR1 PE=1 SV=1	6	0.446595	0.733239	17.1355	16.1808	14.7858	15.758	17.0039	15.7957	16.3084	15.7086
	Q92599	SEPT8_HUMAN Septin-8 OS=Homo sapiens OX=9606 GN=SEPTIN8 PE=1 SV=4	4	0.446968	0.65953	17.2766	14.2414	17.0046	16.8361	17.0907	16.9405	15.7095	16.6614
	Q8N335	GPD1L_HUMAN Glycerol-3-phosphate dehydrogenase 1-like protein OS=Homo sapiens OX=9606 GN=GPD1L PE=1 SV=1	5	0.447896	0.555345	16.0154	15.9728	13.5912	13.5144	16.8805	13.8943	16.668	16.3794
	Q9BTT0	AN32E_HUMAN Acidic leucine-rich nuclear phosphoprotein 32 family member E OS=Homo sapiens OX=9606 GN=ANP32E PE=1 SV=1	7	0.449842	1.16655	17.4778	17.8966	18.41	18.0871	17.3158	17.9923	18.1555	18.2721
	P48147	PPCE_HUMAN Prolyl endopeptidase OS=Homo sapiens OX=9606 GN=PREP PE=1 SV=2	17	0.450137	1.09125	17.6579	17.9882	17.4945	18.084	18.0042	17.7214	17.7259	17.5927
	P60228	EIF3E_HUMAN Eukaryotic translation initiation factor 3 subunit E OS=Homo sapiens OX=9606 GN=EIF3E PE=1 SV=1	9	0.450224	0.800903	18.7704	17.4164	17.614	17.8496	18.7648	17.7954	17.4623	18.2688
	P09525	ANXA4_HUMAN Annexin A4 OS=Homo sapiens OX=9606 GN=ANXA4 PE=1 SV=4	8	0.450825	0.8581	17.5658	16.8518	17.5296	17.4697	17.4454	17.3881	18.0582	18.0062
	P02792	FRIL_HUMAN Ferritin light chain OS=Homo sapiens OX=9606 GN=FTL PE=1 SV=2	4	0.451089	1.82693	16.9521	17.0066	14.6131	17.1755	16.0392	16.9449	13.819	13.774
	Q16563	SYPL1_HUMAN Synaptophysin-like protein 1 OS=Homo sapiens OX=9606 GN=SYPL1 PE=1 SV=1	4	0.451941	1.1824	17.5477	18.2103	17.1421	16.9054	17.1895	17.7522	17.6734	17.6517
	O14745	NHRF1_HUMAN Na(+)/H(+) exchange regulatory cofactor NHE-RF1 OS=Homo sapiens OX=9606 GN=SLC9A3R1 PE=1 SV=4	5	0.452073	1.46017	14.5293	14.9496	16.1314	15.3414	13.7785	16.1771	16.1567	16.3123
	Q9NVS2	RT18A_HUMAN 39S ribosomal protein S18a, mitochondrial OS=Homo sapiens OX=9606 GN=MRPS18A PE=1 SV=1	3	0.452936	0.847554	14.0011	13.6007	13.6222	14.064	14.1463	13.743	14.8514	14.2587
	P49756	RBM25_HUMAN RNA-binding protein 25 OS=Homo sapiens OX=9606 GN=RBM25 PE=1 SV=3	9	0.453482	0.814335	19.0092	17.8076	17.2701	17.7177	17.7762	17.5497	17.9751	17.7704
	P62917	RL8_HUMAN 60S ribosomal protein L8 OS=Homo sapiens OX=9606 GN=RPL8 PE=1 SV=2	6	0.45378	0.8511	21.2968	20.623	21.8579	20.8876	20.8092	21.3659	21.2878	21.4449
	Q9NX55	HYPK_HUMAN Huntingtin-interacting protein K OS=Homo sapiens OX=9606 GN=HYPK PE=1 SV=2	3	0.453973	0.517085	13.353	15.2465	17.1706	16.0863	17.5998	16.3927	16.7485	13.3403
	Q02543	RL18A_HUMAN 60S ribosomal protein L18a OS=Homo sapiens OX=9606 GN=RPL18A PE=1 SV=2	3	0.454625	1.42033	14.2091	16.5373	16.4743	16.2277	17.053	16.7539	16.3585	16.6007
	P51531	SMCA2_HUMAN Probable global transcription activator SNF2L2 OS=Homo sapiens OX=9606 GN=SMARCA2 PE=1 SV=2	3	0.454782	1.17645	15.8638	16.2578	16.2331	16.668	15.8281	16.2923	15.7373	15.3818
	P40123	CAP2_HUMAN Adenylyl cyclase-associated protein 2 OS=Homo sapiens OX=9606 GN=CAP2 PE=1 SV=1	7	0.455262	1.1704	16.0219	16.6558	16.8411	16.6498	16.2758	16.9806	17.2086	16.9693
	P60891	PRPS1_HUMAN Ribose-phosphate pyrophosphokinase 1 OS=Homo sapiens OX=9606 GN=PRPS1 PE=1 SV=2;sp	2	0.455503	1.17326	16.7783	17.2357	17.8878	17.7401	17.1571	17.9088	17.6618	17.5226
	Q15654	TRIP6_HUMAN Thyroid receptor-interacting protein 6 OS=Homo sapiens OX=9606 GN=TRIP6 PE=1 SV=3	13	0.455823	0.816716	18.5643	17.9355	18.1492	17.8955	18.2676	18.038	17.179	17.1227
	Q9C0J8	WDR33_HUMAN pre-mRNA 3 end processing protein WDR33 OS=Homo sapiens OX=9606 GN=WDR33 PE=1 SV=2	4	0.455842	1.37856	13.3285	13.5374	15.3099	14.7977	13.3448	15.0643	14.3024	14.7388
	Q8WXX5	DNJC9_HUMAN DnaJ homolog subfamily C member 9 OS=Homo sapiens OX=9606 GN=DNAJC9 PE=1 SV=1	5	0.456001	0.651263	17.1468	17.4094	15.8726	16.3827	19.1138	16.1886	16.3698	16.0475
	P48556	PSMD8_HUMAN 26S proteasome non-ATPase regulatory subunit 8 OS=Homo sapiens OX=9606 GN=PSMD8 PE=1 SV=2	5	0.456324	0.925285	18.5274	18.4033	18.132	18.3584	18.6268	18.089	18.207	18.1943
	P13073	COX41_HUMAN Cytochrome c oxidase subunit 4 isoform 1, mitochondrial OS=Homo sapiens OX=9606 GN=COX4I1 PE=1 SV=1	3	0.456398	1.34897	16.4216	16.66	17.863	17.3553	17.3413	17.0979	15.8389	18.0791
	Q9NX24	NHP2_HUMAN H/ACA ribonucleoprotein complex subunit 2 OS=Homo sapiens OX=9606 GN=NHP2 PE=1 SV=1	4	0.456595	0.66543	19.8124	17.2472	17.1376	17.4602	17.0996	16.4434	16.8322	17.3804
	O00264	PGRC1_HUMAN Membrane-associated progesterone receptor component 1 OS=Homo sapiens OX=9606 GN=PGRMC1 PE=1 SV=3	5	0.45741	0.854705	20.3064	19.1542	19.3354	19.9295	19.9618	19.3625	19.4415	19.693
	Q9Y221	NIP7_HUMAN 60S ribosome subunit biogenesis protein NIP7 homolog OS=Homo sapiens OX=9606 GN=NIP7 PE=1 SV=1	2	0.458205	1.34721	15.0484	15.3776	14.4889	14.0327	15.4367	15.3624	13.4791	15.4003
	Q9Y312	AAR2_HUMAN Protein AAR2 homolog OS=Homo sapiens OX=9606 GN=AAR2 PE=1 SV=2	3	0.459864	1.16716	15.7106	16.0979	15.9709	15.8489	14.9713	15.7208	16.2028	16.08
	P67809	YBOX1_HUMAN Y-box-binding protein 1 OS=Homo sapiens OX=9606 GN=YBX1 PE=1 SV=3	10	0.459873	0.85373	20.81	20.6244	20.3654	20.9155	21.7209	20.7554	21.0263	20.7148
	P62491	RB11A_HUMAN Ras-related protein Rab-11A OS=Homo sapiens OX=9606 GN=RAB11A PE=1 SV=3	1	0.459969	0.65199	17.0394	14.1063	16.2437	15.7691	16.6952	15.9987	14.1578	15.7938
	P60709	ACTB_HUMAN Actin, cytoplasmic 1 OS=Homo sapiens OX=9606 GN=ACTB PE=1 SV=1	1	0.460083	1.06021	25.3345	25.4412	25.508	25.4423	25.0501	25.451	25.4886	25.3841
	Q9Y5B9	SP16H_HUMAN FACT complex subunit SPT16 OS=Homo sapiens OX=9606 GN=SUPT16H PE=1 SV=1	14	0.460543	1.27565	18.0425	17.4556	17.7931	17.8979	17.3543	17.7388	16.0847	17.5872
	Q13561	DCTN2_HUMAN Dynactin subunit 2 OS=Homo sapiens OX=9606 GN=DCTN2 PE=1 SV=4	10	0.461547	1.18716	19.0493	19.5525	19.5112	19.2391	18.3026	19.4078	19.6775	19.3312
	O60264	SMCA5_HUMAN SWI/SNF-related matrix-associated actin-dependent regulator of chromatin subfamily A member 5 OS=Homo sapiens OX=9606 GN=SMARCA5 PE=1 SV=1	12	0.461749	0.826955	16.8616	16.4896	16.3273	16.4556	17.089	15.8633	15.6817	16.0546
	Q06124	PTN11_HUMAN Tyrosine-protein phosphatase non-receptor type 11 OS=Homo sapiens OX=9606 GN=PTPN11 PE=1 SV=3	9	0.462109	1.1115	16.3466	16.421	16.2038	16.995	16.6355	16.5675	16.3628	16.1753
	Q6UXN9	WDR82_HUMAN WD repeat-containing protein 82 OS=Homo sapiens OX=9606 GN=WDR82 PE=1 SV=1	5	0.462149	1.34925	14.3911	16.545	16.6657	16.2091	16.0256	16.3473	16.7399	16.4495
	Q15075	EEA1_HUMAN Early endosome antigen 1 OS=Homo sapiens OX=9606 GN=EEA1 PE=1 SV=2	29	0.46262	1.05781	18.1168	18.0007	18.09	18.0287	17.7969	18.0027	17.7075	18.0033
	Q9NVD7	PARVA_HUMAN Alpha-parvin OS=Homo sapiens OX=9606 GN=PARVA PE=1 SV=1	5	0.464258	0.548842	16.8244	16.4416	17.0973	16.8495	17.5027	14.4314	13.7812	14.021
	P23193	TCEA1_HUMAN Transcription elongation factor A protein 1 OS=Homo sapiens OX=9606 GN=TCEA1 PE=1 SV=2	5	0.464502	1.70329	14.6362	15.6836	17.7458	16.8683	14.3902	17.1448	17.4544	17.6033
	P51692	STA5B_HUMAN Signal transducer and activator of transcription 5B OS=Homo sapiens OX=9606 GN=STAT5B PE=1 SV=2;sp	4	0.464529	1.35112	15.5267	15.0429	15.8711	15.3546	14.9742	15.4224	13.4358	15.7246
	P27348	1433T_HUMAN 14-3-3 protein theta OS=Homo sapiens OX=9606 GN=YWHAQ PE=1 SV=1	12	0.46453	1.07676	20.7181	21.2034	21.2674	21.2623	21.2036	21.1162	21.251	21.2849
	O43813	LANC1_HUMAN Glutathione S-transferase LANCL1 OS=Homo sapiens OX=9606 GN=LANCL1 PE=1 SV=1	4	0.464877	1.19321	16.0353	15.8482	16.3566	16.1423	16.0016	16.049	14.9207	16.294
	Q15785	TOM34_HUMAN Mitochondrial import receptor subunit TOM34 OS=Homo sapiens OX=9606 GN=TOMM34 PE=1 SV=2	6	0.465955	0.636496	14.9591	13.8523	16.676	15.1971	17.2739	16.7788	16.0634	16.5371
	Q13347	EIF3I_HUMAN Eukaryotic translation initiation factor 3 subunit I OS=Homo sapiens OX=9606 GN=EIF3I PE=1 SV=1	10	0.466334	1.08597	17.7491	18.065	18.4071	18.0865	18.0006	18.3597	18.1161	18.2376
	P12956	XRCC6_HUMAN X-ray repair cross-complementing protein 6 OS=Homo sapiens OX=9606 GN=XRCC6 PE=1 SV=2	24	0.467644	0.913859	20.3366	20.005	19.6897	20.0989	20.119	19.7334	19.9319	19.7199
	Q8NBU5	ATAD1_HUMAN ATPase family AAA domain-containing protein 1 OS=Homo sapiens OX=9606 GN=ATAD1 PE=1 SV=1	5	0.467871	0.801139	16.5936	15.9592	16.7893	15.9821	16.7188	16.1002	15.07	15.8507
	P09543	CN37_HUMAN 2,3-cyclic-nucleotide 3-phosphodiesterase OS=Homo sapiens OX=9606 GN=CNP PE=1 SV=2	13	0.470051	1.11092	18.706	19.3688	19.251	18.9227	19.4133	19.1842	18.8152	19.3168
	P85037	FOXK1_HUMAN Forkhead box protein K1 OS=Homo sapiens OX=9606 GN=FOXK1 PE=1 SV=1	2	0.471749	1.23807	13.8485	14.8245	13.6207	14.916	15.2843	14.406	14.4779	14.3173
	P36969	GPX4_HUMAN Phospholipid hydroperoxide glutathione peroxidase OS=Homo sapiens OX=9606 GN=GPX4 PE=1 SV=3	3	0.472222	0.665055	16.4862	17.346	18.0298	17.3153	17.7743	17.2562	16.646	14.665
	Q9Y6E0	STK24_HUMAN Serine/threonine-protein kinase 24 OS=Homo sapiens OX=9606 GN=STK24 PE=1 SV=1	3	0.472321	1.40862	15.3347	14.7381	16.0813	16.0386	15.9206	16.0324	13.6807	16.1854
	Q13442	HAP28_HUMAN 28 kDa heat- and acid-stable phosphoprotein OS=Homo sapiens OX=9606 GN=PDAP1 PE=1 SV=1	5	0.472394	1.20319	16.4456	16.7424	17.4876	17.4845	17.5919	17.723	17.074	17.7167
	Q9HB71	CYBP_HUMAN Calcyclin-binding protein OS=Homo sapiens OX=9606 GN=CACYBP PE=1 SV=2	12	0.472616	0.914613	18.2159	18.3722	18.8288	18.4642	18.8205	18.7093	18.8033	18.6077
	O76094	SRP72_HUMAN Signal recognition particle subunit SRP72 OS=Homo sapiens OX=9606 GN=SRP72 PE=1 SV=3	14	0.472718	1.16769	17.8508	16.9804	17.5073	17.8787	17.3551	17.7217	17.0821	18.1092
	O75431	MTX2_HUMAN Metaxin-2 OS=Homo sapiens OX=9606 GN=MTX2 PE=1 SV=1	4	0.47379	1.10002	15.5101	15.9093	16.1596	16.1303	15.9651	15.8469	16.0356	16.334
	P10644	KAP0_HUMAN cAMP-dependent protein kinase type I-alpha regulatory subunit OS=Homo sapiens OX=9606 GN=PRKAR1A PE=1 SV=1	9	0.474879	1.27069	18.8962	19.3233	18.4882	18.7535	19.3212	18.5266	17.3597	18.8443
	P26373	RL13_HUMAN 60S ribosomal protein L13 OS=Homo sapiens OX=9606 GN=RPL13 PE=1 SV=4	5	0.475996	1.16613	17.8692	18.4364	18.7753	18.4703	18.4167	19.0757	18.9733	18.939
	Q8N257	H2B3B_HUMAN Histone H2B type 3-B OS=Homo sapiens OX=9606 GN=H2BU1 PE=1 SV=3;sp	2	0.476229	0.513131	18.5465	19.2958	18.9635	19.4692	19.8888	19.348	18.9968	14.4322
	Q9NX58	LYAR_HUMAN Cell growth-regulating nucleolar protein OS=Homo sapiens OX=9606 GN=LYAR PE=1 SV=2	8	0.476398	0.818824	18.2517	17.0282	18.101	17.189	16.7603	17.3423	17.1384	17.5384
	Q9H6R4	NOL6_HUMAN Nucleolar protein 6 OS=Homo sapiens OX=9606 GN=NOL6 PE=1 SV=2	3	0.476416	0.884513	15.9119	15.5056	16.2859	15.5431	15.2951	15.7733	15.4841	15.4468
	O95197	RTN3_HUMAN Reticulon-3 OS=Homo sapiens OX=9606 GN=RTN3 PE=1 SV=2	2	0.47651	0.656764	18.9463	18.9785	19.3645	19.5462	19.2942	19.6132	19.2148	16.2559
	O95793	STAU1_HUMAN Double-stranded RNA-binding protein Staufen homolog 1 OS=Homo sapiens OX=9606 GN=STAU1 PE=1 SV=2	8	0.476598	1.1098	16.4034	16.9614	17.1003	16.7276	16.3978	17.0347	16.9057	16.6848
	Q9P2D3	HTR5B_HUMAN HEAT repeat-containing protein 5B OS=Homo sapiens OX=9606 GN=HEATR5B PE=1 SV=2	2	0.476916	1.36546	15.2162	17.029	14.8079	14.6122	14.8006	14.4989	15.0172	15.4993
	Q5SWX8	ODR4_HUMAN Protein odr-4 homolog OS=Homo sapiens OX=9606 GN=ODR4 PE=1 SV=1	2	0.477195	1.20965	15.1353	14.3611	14.3753	15.0564	14.8086	15.1384	13.7036	14.5652
	Q58FF8	H90B2_HUMAN Putative heat shock protein HSP 90-beta 2 OS=Homo sapiens OX=9606 GN=HSP90AB2P PE=1 SV=2	1	0.477331	0.806593	21.0933	21.8598	22.2563	21.6634	21.241	21.0224	22.5692	21.3738
	Q9H4G4	GAPR1_HUMAN Golgi-associated plant pathogenesis-related protein 1 OS=Homo sapiens OX=9606 GN=GLIPR2 PE=1 SV=3	3	0.477387	0.775336	14.6823	15.154	15.6115	15.7808	16.8105	15.66	16.336	15.3771
	P51151	RAB9A_HUMAN Ras-related protein Rab-9A OS=Homo sapiens OX=9606 GN=RAB9A PE=1 SV=1	3	0.477571	0.849467	15.6501	15.2965	14.6041	15.2854	15.681	14.7424	15.0091	14.6785
	Q9C0C9	UBE2O_HUMAN (E3-independent) E2 ubiquitin-conjugating enzyme OS=Homo sapiens OX=9606 GN=UBE2O PE=1 SV=3	8	0.478106	0.922311	16.5638	16.3657	16.4534	16.1619	16.2459	16.1723	15.9356	16.0319
	P51991	ROA3_HUMAN Heterogeneous nuclear ribonucleoprotein A3 OS=Homo sapiens OX=9606 GN=HNRNPA3 PE=1 SV=2	14	0.478125	0.855791	20.8365	20.3204	19.7119	20.2372	20.9344	20.1025	20.1406	20.0645
	Q8NBX0	SCPDL_HUMAN Saccharopine dehydrogenase-like oxidoreductase OS=Homo sapiens OX=9606 GN=SCCPDH PE=1 SV=1	7	0.479994	0.685769	16.6664	14.9658	16.0488	14.9216	16.4644	16.4835	14.067	14.6988
	O15116	LSM1_HUMAN U6 snRNA-associated Sm-like protein LSm1 OS=Homo sapiens OX=9606 GN=LSM1 PE=1 SV=1	2	0.480125	0.914109	16.1184	15.9637	15.6423	15.8225	15.5932	15.5773	15.9922	15.4643
	P54727	RD23B_HUMAN UV excision repair protein RAD23 homolog B OS=Homo sapiens OX=9606 GN=RAD23B PE=1 SV=1	7	0.480884	0.711627	19.7453	17.4702	18.4723	17.2719	16.8378	18.0079	18.0791	18.4212
	Q9Y2G5	OFUT2_HUMAN GDP-fucose protein O-fucosyltransferase 2 OS=Homo sapiens OX=9606 GN=POFUT2 PE=1 SV=3	3	0.483629	1.47774	16.1645	15.3752	13.1977	16.2164	16.0239	15.8642	16.1031	16.287
	Q86W92	LIPB1_HUMAN Liprin-beta-1 OS=Homo sapiens OX=9606 GN=PPFIBP1 PE=1 SV=2	7	0.483992	0.808467	16.7787	15.5836	17.0755	16.1514	15.4502	16.1345	15.779	15.9868
	P98194	AT2C1_HUMAN Calcium-transporting ATPase type 2C member 1 OS=Homo sapiens OX=9606 GN=ATP2C1 PE=1 SV=3	2	0.484215	1.19798	16.1252	16.0738	15.751	15.9851	16.0031	15.7017	14.6393	15.8003
	P59998	ARPC4_HUMAN Actin-related protein 2/3 complex subunit 4 OS=Homo sapiens OX=9606 GN=ARPC4 PE=1 SV=3	7	0.484403	1.3933	19.2947	18.2644	18.2405	18.983	19.1424	18.9063	16.6099	19.0477
	Q9BUF5	TBB6_HUMAN Tubulin beta-6 chain OS=Homo sapiens OX=9606 GN=TUBB6 PE=1 SV=1	10	0.484446	1.13093	18.9174	19.6802	19.6966	19.5203	19.5344	19.7935	19.9918	19.8563
	P82979	SARNP_HUMAN SAP domain-containing ribonucleoprotein OS=Homo sapiens OX=9606 GN=SARNP PE=1 SV=3	3	0.484611	1.10248	17.5919	18.0423	17.8603	18.0352	18.4219	18.1297	18.097	18.3269
	P62854	RS26_HUMAN 40S ribosomal protein S26 OS=Homo sapiens OX=9606 GN=RPS26 PE=1 SV=3;sp	3	0.484875	1.53057	15.033	15.1674	16.4093	16.0323	15.8083	15.605	12.7295	15.6316
	Q8N5C6	SRBD1_HUMAN S1 RNA-binding domain-containing protein 1 OS=Homo sapiens OX=9606 GN=SRBD1 PE=1 SV=2	2	0.485492	0.770508	15.1076	15.2574	15.2019	15.4052	15.0591	14.4871	14.5669	13.2813
	Q9P287	BCCIP_HUMAN BRCA2 and CDKN1A-interacting protein OS=Homo sapiens OX=9606 GN=BCCIP PE=1 SV=1	3	0.485707	0.906861	17.5881	17.8363	17.6195	17.4577	17.4188	16.9385	17.6027	17.4324
	P29083	T2EA_HUMAN General transcription factor IIE subunit 1 OS=Homo sapiens OX=9606 GN=GTF2E1 PE=1 SV=2	2	0.485934	1.25813	14.9269	14.1471	13.3472	14.374	13.8736	14.2922	13.0148	13.6743
	P60953	CDC42_HUMAN Cell division control protein 42 homolog OS=Homo sapiens OX=9606 GN=CDC42 PE=1 SV=2	6	0.486827	0.827885	19.2447	18.9007	19.9074	18.7106	19.536	19.8624	19.8957	20.0201
	Q96PP8	GBP5_HUMAN Guanylate-binding protein 5 OS=Homo sapiens OX=9606 GN=GBP5 PE=1 SV=1	6	0.487877	1.0804	15.8893	15.5989	15.9126	16.1744	15.793	16.2453	15.8472	15.8697
	Q9BRX5	PSF3_HUMAN DNA replication complex GINS protein PSF3 OS=Homo sapiens OX=9606 GN=GINS3 PE=1 SV=1	2	0.488073	0.702172	14.7068	15.4827	13.2368	13.5649	15.6676	13.5689	14.6503	13.6046
	P46063	RECQ1_HUMAN ATP-dependent DNA helicase Q1 OS=Homo sapiens OX=9606 GN=RECQL PE=1 SV=3	8	0.488197	0.817875	17.913	17.8639	17.2216	17.76	18.9807	17.337	17.6304	17.6246
	P62899	RL31_HUMAN 60S ribosomal protein L31 OS=Homo sapiens OX=9606 GN=RPL31 PE=1 SV=1	2	0.488991	1.67219	16.9825	18.6382	19.7924	18.3629	16.6029	19.7792	20.2177	19.782
	P25205	MCM3_HUMAN DNA replication licensing factor MCM3 OS=Homo sapiens OX=9606 GN=MCM3 PE=1 SV=3	14	0.489825	1.10365	17.6313	17.7803	18.092	17.7855	17.2029	17.903	17.8723	17.899
	P50502	F10A1_HUMAN Hsc70-interacting protein OS=Homo sapiens OX=9606 GN=ST13 PE=1 SV=2;sp	6	0.491265	0.93832	18.8946	18.7712	18.6214	18.5546	18.8733	18.9497	19.0805	18.8268
	Q9Y3T9	NOC2L_HUMAN Nucleolar complex protein 2 homolog OS=Homo sapiens OX=9606 GN=NOC2L PE=1 SV=4	3	0.491477	1.22727	15.3993	15.632	14.1038	15.2366	15.2078	14.3983	14.9514	15.5772
	Q92797	SYMPK_HUMAN Symplekin OS=Homo sapiens OX=9606 GN=SYMPK PE=1 SV=2	4	0.492737	0.716317	15.5432	14.9171	13.6874	14.1863	16.1971	14.7628	14.0587	13.6948
	P00505	AATM_HUMAN Aspartate aminotransferase, mitochondrial OS=Homo sapiens OX=9606 GN=GOT2 PE=1 SV=3	16	0.493459	1.09609	19.1499	19.1777	18.7569	19.0867	18.4663	18.7146	18.8454	18.7691
	Q8NC56	LEMD2_HUMAN LEM domain-containing protein 2 OS=Homo sapiens OX=9606 GN=LEMD2 PE=1 SV=1	2	0.493909	1.3982	14.0286	15.0286	15.5148	13.2558	13.7816	15.615	13.8044	15.1642
	Q96BH1	RNF25_HUMAN E3 ubiquitin-protein ligase RNF25 OS=Homo sapiens OX=9606 GN=RNF25 PE=1 SV=1	4	0.494675	0.823504	14.2919	14.682	15.1835	14.888	14.9637	13.668	14.0489	14.1294
	Q5H9R7	PP6R3_HUMAN Serine/threonine-protein phosphatase 6 regulatory subunit 3 OS=Homo sapiens OX=9606 GN=PPP6R3 PE=1 SV=2	13	0.495116	0.914674	17.1427	16.4232	16.5746	16.7141	16.7838	16.9772	17.0303	16.9021
	Q92614	MY18A_HUMAN Unconventional myosin-XVIIIa OS=Homo sapiens OX=9606 GN=MYO18A PE=1 SV=3	11	0.496417	0.884622	17.426	16.8956	16.9938	16.5508	16.3719	16.6541	16.5996	16.5833
	O00461	GOLI4_HUMAN Golgi integral membrane protein 4 OS=Homo sapiens OX=9606 GN=GOLIM4 PE=1 SV=1	7	0.496835	0.699494	16.3589	14.6875	17.2513	16.5287	14.7902	16.0989	15.6249	14.6478
	Q9Y490	TLN1_HUMAN Talin-1 OS=Homo sapiens OX=9606 GN=TLN1 PE=1 SV=3	70	0.497677	1.08471	19.0018	19.4279	19.7394	19.4236	19.4232	19.6427	19.461	19.6004
	P61163	ACTZ_HUMAN Alpha-centractin OS=Homo sapiens OX=9606 GN=ACTR1A PE=1 SV=1	6	0.498181	0.927264	18.6036	18.3664	18.4282	18.3238	18.5198	18.1887	17.9582	18.1952
	O75352	MPU1_HUMAN Mannose-P-dolichol utilization defect 1 protein OS=Homo sapiens OX=9606 GN=MPDU1 PE=1 SV=2	2	0.498553	1.54247	14.0513	17.0451	13.7593	15.6825	16.6391	15.3106	16.474	15.3864
	P43034	LIS1_HUMAN Platelet-activating factor acetylhydrolase IB subunit alpha OS=Homo sapiens OX=9606 GN=PAFAH1B1 PE=1 SV=2	10	0.498905	0.831212	18.3701	17.8022	17.2453	17.5604	17.5993	17.4863	17.2943	16.5932
	O60749	SNX2_HUMAN Sorting nexin-2 OS=Homo sapiens OX=9606 GN=SNX2 PE=1 SV=2	3	0.499067	1.08675	17.6866	17.5264	17.4435	17.4227	17.0054	17.7274	17.6307	17.5698
	Q02878	RL6_HUMAN 60S ribosomal protein L6 OS=Homo sapiens OX=9606 GN=RPL6 PE=1 SV=3	10	0.49939	1.17298	19.4344	20.2677	20.8617	20.547	20.4826	20.6511	20.4563	20.69
	O95249	GOSR1_HUMAN Golgi SNAP receptor complex member 1 OS=Homo sapiens OX=9606 GN=GOSR1 PE=1 SV=1	3	0.499509	1.10469	17.6596	17.3327	17.0884	17.479	17.324	17.2588	16.7373	17.3134
	Q16186	ADRM1_HUMAN Proteasomal ubiquitin receptor ADRM1 OS=Homo sapiens OX=9606 GN=ADRM1 PE=1 SV=2	5	0.499825	1.30064	15.9376	17.3962	17.5405	18.1027	17.7978	17.8734	18.2753	17.6957
	Q2TAA2	IAH1_HUMAN Isoamyl acetate-hydrolyzing esterase 1 homolog OS=Homo sapiens OX=9606 GN=IAH1 PE=1 SV=1	3	0.499842	0.704002	16.9948	14.4549	16.1986	16.9839	16.7311	17.051	17.6132	17.0224
	Q29RF7	PDS5A_HUMAN Sister chromatid cohesion protein PDS5 homolog A OS=Homo sapiens OX=9606 GN=PDS5A PE=1 SV=1	10	0.501566	0.533588	18.0661	13.3375	16.0344	16.4466	17.8986	15.9684	13.6056	16.2274
	Q9BWS9	CHID1_HUMAN Chitinase domain-containing protein 1 OS=Homo sapiens OX=9606 GN=CHID1 PE=1 SV=1	6	0.50187	0.802213	16.6829	16.2829	15.8737	15.5984	16.713	15.6559	14.9981	15.4586
	O00154	BACH_HUMAN Cytosolic acyl coenzyme A thioester hydrolase OS=Homo sapiens OX=9606 GN=ACOT7 PE=1 SV=3	6	0.502432	1.11451	18.3688	18.9125	18.8969	18.9976	19.2878	18.7732	18.4441	18.94
	P55210	CASP7_HUMAN Caspase-7 OS=Homo sapiens OX=9606 GN=CASP7 PE=1 SV=1	4	0.502618	1.14431	14.4781	14.2378	13.448	14.1464	14.5035	14.2683	13.6826	14.2375
	P23786	CPT2_HUMAN Carnitine O-palmitoyltransferase 2, mitochondrial OS=Homo sapiens OX=9606 GN=CPT2 PE=1 SV=2	9	0.502833	0.738903	14.4206	14.7487	13.7995	13.4831	16.0899	13.6902	14.0413	14.6832
	P27144	KAD4_HUMAN Adenylate kinase 4, mitochondrial OS=Homo sapiens OX=9606 GN=AK4 PE=1 SV=1	5	0.503824	0.898157	16.557	16.5519	17.0431	16.7296	16.8015	17.1434	17.3954	16.7523
	Q99613	EIF3C_HUMAN Eukaryotic translation initiation factor 3 subunit C OS=Homo sapiens OX=9606 GN=EIF3C PE=1 SV=1;sp	17	0.505022	0.830374	18.3697	18.6339	17.9052	18.5502	19.5837	18.2217	19.0129	18.3931
	P61978	HNRPK_HUMAN Heterogeneous nuclear ribonucleoprotein K OS=Homo sapiens OX=9606 GN=HNRNPK PE=1 SV=1	19	0.505429	0.937376	21.185	21.0525	20.9284	21.0556	20.9372	21.0111	21.4854	21.0436
	P39687	AN32A_HUMAN Acidic leucine-rich nuclear phosphoprotein 32 family member A OS=Homo sapiens OX=9606 GN=ANP32A PE=1 SV=1	3	0.505454	1.0656	18.8224	19.2471	19.175	19.193	19.4456	19.2637	19.0941	19.2
	P49959	MRE11_HUMAN Double-strand break repair protein MRE11 OS=Homo sapiens OX=9606 GN=MRE11 PE=1 SV=3	9	0.510245	1.11461	16.6495	17.1043	16.0282	16.657	16.6446	16.5028	16.7842	16.4684
	Q8TDB6	DTX3L_HUMAN E3 ubiquitin-protein ligase DTX3L OS=Homo sapiens OX=9606 GN=DTX3L PE=1 SV=1	7	0.511177	1.22092	17.0067	16.177	15.5868	16.2319	15.071	16.2718	15.9021	16.0377
	P51570	GALK1_HUMAN Galactokinase OS=Homo sapiens OX=9606 GN=GALK1 PE=1 SV=1	5	0.511184	1.64302	16.9319	15.7338	18.4637	18.2581	14.8757	18.5973	17.7768	18.3243
	Q04323	UBXN1_HUMAN UBX domain-containing protein 1 OS=Homo sapiens OX=9606 GN=UBXN1 PE=1 SV=2	6	0.511371	0.877659	18.6372	18.1274	18.0952	18.0508	18.7098	17.9524	17.5661	18.1247
	Q9H9E3	COG4_HUMAN Conserved oligomeric Golgi complex subunit 4 OS=Homo sapiens OX=9606 GN=COG4 PE=1 SV=3	4	0.511438	1.49187	15.9556	15.2043	16.2767	15.7986	15.3708	15.7895	12.7017	15.8209
	Q99536	VAT1_HUMAN Synaptic vesicle membrane protein VAT-1 homolog OS=Homo sapiens OX=9606 GN=VAT1 PE=1 SV=2	8	0.511464	0.921459	19.3978	18.8306	18.7863	18.6106	18.8976	18.9926	18.834	19.0098
	Q9BR76	COR1B_HUMAN Coronin-1B OS=Homo sapiens OX=9606 GN=CORO1B PE=1 SV=1	6	0.51182	1.13018	17.627	17.0441	17.389	17.2241	17.1432	17.7484	16.7021	17.551
	Q99614	TTC1_HUMAN Tetratricopeptide repeat protein 1 OS=Homo sapiens OX=9606 GN=TTC1 PE=1 SV=1	5	0.512013	1.17213	16.3056	16.132	17.1798	16.9612	16.4386	17.0045	16.6589	17.4017
	Q2M2I8	AAK1_HUMAN AP2-associated protein kinase 1 OS=Homo sapiens OX=9606 GN=AAK1 PE=1 SV=3	6	0.512073	1.34794	15.9951	16.2795	16.7739	16.0412	16.2919	16.1	13.9828	16.346
	Q13642	FHL1_HUMAN Four and a half LIM domains protein 1 OS=Homo sapiens OX=9606 GN=FHL1 PE=1 SV=4	6	0.512573	0.62818	14.9749	15.3028	14.1161	15.8952	18.2465	14.2754	16.3193	15.5004
	Q9BQA1	MEP50_HUMAN Methylosome protein 50 OS=Homo sapiens OX=9606 GN=WDR77 PE=1 SV=1	3	0.512629	1.24576	16.2997	15.9395	17.0778	16.2776	15.5313	16.6021	15.1231	16.4808
	Q69YN2	C19L1_HUMAN CWF19-like protein 1 OS=Homo sapiens OX=9606 GN=CWF19L1 PE=1 SV=2	3	0.512825	1.7957	14.4182	14.0878	16.7289	15.3983	11.302	15.6943	15.2399	15.8868
	P22061	PIMT_HUMAN Protein-L-isoaspartate(D-aspartate) O-methyltransferase OS=Homo sapiens OX=9606 GN=PCMT1 PE=1 SV=4	8	0.512889	1.13582	18.8218	19.8862	19.579	19.4505	19.2703	19.6397	19.9479	19.3777
	O95292	VAPB_HUMAN Vesicle-associated membrane protein-associated protein B/C OS=Homo sapiens OX=9606 GN=VAPB PE=1 SV=3	4	0.512935	1.17101	18.4394	18.5255	19.1686	18.9548	19.1653	19.0345	17.9372	19.1068
	P35610	SOAT1_HUMAN Sterol O-acyltransferase 1 OS=Homo sapiens OX=9606 GN=SOAT1 PE=1 SV=3	4	0.513267	1.20007	16.4925	16.6333	15.7283	16.9137	16.4739	15.7919	15.4785	15.8869
	P35237	SPB6_HUMAN Serpin B6 OS=Homo sapiens OX=9606 GN=SERPINB6 PE=1 SV=3	12	0.513677	1.07815	18.6477	18.7678	18.4971	18.6203	18.4223	18.3028	18.0965	18.407
	Q9H7D7	WDR26_HUMAN WD repeat-containing protein 26 OS=Homo sapiens OX=9606 GN=WDR26 PE=1 SV=3	2	0.514728	0.769945	16.127	15.7867	15.0216	15.5449	16.4586	15.4972	14.8663	14.1359
	P55060	XPO2_HUMAN Exportin-2 OS=Homo sapiens OX=9606 GN=CSE1L PE=1 SV=3	24	0.51482	1.05416	18.4009	18.6547	18.8704	18.7165	18.7132	18.7281	18.6989	18.8886
	P60981	DEST_HUMAN Destrin OS=Homo sapiens OX=9606 GN=DSTN PE=1 SV=3	8	0.515536	1.14912	19.2867	18.9009	18.6337	19.8911	19.6234	19.4708	19.2947	19.3778
	P15151	PVR_HUMAN Poliovirus receptor OS=Homo sapiens OX=9606 GN=PVR PE=1 SV=2	2	0.51634	0.706066	18.6521	17.0082	15.9368	16.3345	16.0283	15.8944	16.1521	15.5237
	Q9NYU2	UGGG1_HUMAN UDP-glucose:glycoprotein glucosyltransferase 1 OS=Homo sapiens OX=9606 GN=UGGT1 PE=1 SV=3	20	0.516583	1.05639	17.3601	17.4017	16.9457	17.3626	17.3039	17.1383	17.1408	17.1645
	Q9Y3C6	PPIL1_HUMAN Peptidyl-prolyl cis-trans isomerase-like 1 OS=Homo sapiens OX=9606 GN=PPIL1 PE=1 SV=1	2	0.516943	0.881604	18.0928	17.0473	17.5158	17.5588	17.0362	17.6293	17.4338	17.1161
	O95801	TTC4_HUMAN Tetratricopeptide repeat protein 4 OS=Homo sapiens OX=9606 GN=TTC4 PE=1 SV=3	3	0.517519	0.641559	13.5979	13.9219	16.4296	15.9488	15.3951	15.8688	16.161	13.2828
	Q8TD16	BICD2_HUMAN Protein bicaudal D homolog 2 OS=Homo sapiens OX=9606 GN=BICD2 PE=1 SV=1	3	0.518046	0.712832	15.8433	15.3115	13.4768	15.1911	15.2689	13.2884	15.6274	14.472
	Q9H5N1	RABE2_HUMAN Rab GTPase-binding effector protein 2 OS=Homo sapiens OX=9606 GN=RABEP2 PE=1 SV=2	2	0.518326	1.21552	15.4961	14.3089	14.4557	15.3963	14.9697	15.0461	13.953	15.2494
	Q07021	C1QBP_HUMAN Complement component 1 Q subcomponent-binding protein, mitochondrial OS=Homo sapiens OX=9606 GN=C1QBP PE=1 SV=1	7	0.519383	0.833908	21.6842	21.2466	20.4951	20.8089	21.3401	20.1273	20.4665	20.7549
	Q12874	SF3A3_HUMAN Splicing factor 3A subunit 3 OS=Homo sapiens OX=9606 GN=SF3A3 PE=1 SV=1	9	0.521318	0.775059	18.2209	17.5337	16.85	17.2568	18.7617	17.1121	16.5731	17.0326
	O95302	FKBP9_HUMAN Peptidyl-prolyl cis-trans isomerase FKBP9 OS=Homo sapiens OX=9606 GN=FKBP9 PE=1 SV=2	3	0.522313	3.07511	13.7779	12.406	18.3753	19.9454	14.9211	20.5354	19.5044	20.1745
	P30084	ECHM_HUMAN Enoyl-CoA hydratase, mitochondrial OS=Homo sapiens OX=9606 GN=ECHS1 PE=1 SV=4	6	0.522749	0.926628	18.8264	18.2887	18.5403	18.5438	18.1747	18.5815	18.7741	18.4618
	P09429	HMGB1_HUMAN High mobility group protein B1 OS=Homo sapiens OX=9606 GN=HMGB1 PE=1 SV=3;sp	9	0.523424	0.809851	19.3764	18.2485	17.7132	18.7533	19.6806	18.6378	18.7117	18.6252
	Q92888	ARHG1_HUMAN Rho guanine nucleotide exchange factor 1 OS=Homo sapiens OX=9606 GN=ARHGEF1 PE=1 SV=2	11	0.523441	1.10061	17.0635	17.1185	16.4949	16.7898	16.4119	16.7295	16.544	16.4298
	P27797	CALR_HUMAN Calreticulin OS=Homo sapiens OX=9606 GN=CALR PE=1 SV=1	19	0.52426	0.90524	22.4161	22.0459	21.6941	22.1445	22.4593	21.775	21.8449	21.8745
	O43929	ORC4_HUMAN Origin recognition complex subunit 4 OS=Homo sapiens OX=9606 GN=ORC4 PE=1 SV=2	4	0.524664	0.767483	15.1686	13.3011	15.2331	14.7156	15.355	14.7536	13.6709	15.1301
	Q12792	TWF1_HUMAN Twinfilin-1 OS=Homo sapiens OX=9606 GN=TWF1 PE=1 SV=3	7	0.525268	1.07224	18.0839	17.8921	18.281	18.3496	17.7869	18.0626	18.0714	18.3214
	Q15650	TRIP4_HUMAN Activating signal cointegrator 1 OS=Homo sapiens OX=9606 GN=TRIP4 PE=1 SV=4	2	0.525607	1.39171	14.0426	16.9923	15.1398	15.4719	15.0745	15.0744	15.2027	13.8284
	Q13451	FKBP5_HUMAN Peptidyl-prolyl cis-trans isomerase FKBP5 OS=Homo sapiens OX=9606 GN=FKBP5 PE=1 SV=2	4	0.525713	0.831181	17.4801	16.0276	15.8747	16.6069	16.9311	16.4186	16.0639	16.2298
	Q9HC35	EMAL4_HUMAN Echinoderm microtubule-associated protein-like 4 OS=Homo sapiens OX=9606 GN=EML4 PE=1 SV=3	11	0.527395	1.23044	16.8739	16.2062	16.3681	16.3608	16.0195	16.98	15.0348	15.9459
	Q0VDF9	HSP7E_HUMAN Heat shock 70 kDa protein 14 OS=Homo sapiens OX=9606 GN=HSPA14 PE=1 SV=1	5	0.527436	1.30485	16.3075	15.2632	13.7402	15.6124	15.1421	14.9302	14.3378	15.2574
	Q8TBX8	PI42C_HUMAN Phosphatidylinositol 5-phosphate 4-kinase type-2 gamma OS=Homo sapiens OX=9606 GN=PIP4K2C PE=1 SV=3	4	0.528269	0.798984	17.0975	15.5804	16.6181	16.0052	16.408	16.0878	14.925	16.0802
	Q14019	COTL1_HUMAN Coactosin-like protein OS=Homo sapiens OX=9606 GN=COTL1 PE=1 SV=3	3	0.528939	1.2178	17.9476	18.8612	17.9092	18.6546	19.3441	18.4935	17.6557	17.9845
	Q9NX74	DUS2L_HUMAN tRNA-dihydrouridine(20) synthase [NAD(P)+]-like OS=Homo sapiens OX=9606 GN=DUS2 PE=1 SV=1	2	0.529307	1.58012	17.4106	17.3891	16.5884	17.128	15.0479	16.8016	14.145	14.5135
	Q9UKX7	NUP50_HUMAN Nuclear pore complex protein Nup50 OS=Homo sapiens OX=9606 GN=NUP50 PE=1 SV=2	5	0.529478	1.13858	15.3961	15.3996	16.0528	16.2105	15.3033	16.0103	16.146	16.0268
	P09012	SNRPA_HUMAN U1 small nuclear ribonucleoprotein A OS=Homo sapiens OX=9606 GN=SNRPA PE=1 SV=3	3	0.529483	0.562642	17.3796	16.5836	17.8285	17.0608	17.6816	13.1672	14.4852	17.2445
	Q00325	MPCP_HUMAN Phosphate carrier protein, mitochondrial OS=Homo sapiens OX=9606 GN=SLC25A3 PE=1 SV=2	6	0.529634	1.3358	18.2648	19.9426	19.1574	19.2823	20.657	18.8684	18.1928	19.8495
	Q9Y4X5	ARI1_HUMAN E3 ubiquitin-protein ligase ARIH1 OS=Homo sapiens OX=9606 GN=ARIH1 PE=1 SV=2	6	0.530576	1.31095	14.8933	16.1737	17.4301	16.2168	15.2384	16.5365	16.3885	16.5858
	Q9BUL8	PDC10_HUMAN Programmed cell death protein 10 OS=Homo sapiens OX=9606 GN=PDCD10 PE=1 SV=1	3	0.531106	1.35387	16.8894	16.2842	16.1425	16.8715	16.1583	15.9361	14.0293	15.8761
	Q12959	DLG1_HUMAN Disks large homolog 1 OS=Homo sapiens OX=9606 GN=DLG1 PE=1 SV=2	5	0.531185	1.39586	16.5944	16.2969	16.1406	15.7303	16.1441	16.2181	13.4719	16.0303
	Q8N6M0	OTU6B_HUMAN Deubiquitinase OTUD6B OS=Homo sapiens OX=9606 GN=OTUD6B PE=1 SV=1	3	0.532431	1.37285	15.688	14.7398	16.7884	15.976	14.1847	16.2633	15.2614	16.7721
	Q9NRY5	F1142_HUMAN Protein FAM114A2 OS=Homo sapiens OX=9606 GN=FAM114A2 PE=1 SV=4	5	0.533173	1.16544	15.9772	15.5601	16.5032	16.6048	16.2938	16.3694	15.4628	16.5862
	O94979	SC31A_HUMAN Protein transport protein Sec31A OS=Homo sapiens OX=9606 GN=SEC31A PE=1 SV=3	14	0.534268	0.893823	17.6226	17.1248	18.0118	17.5766	17.9278	17.6424	17.0783	17.6489
	P42765	THIM_HUMAN 3-ketoacyl-CoA thiolase, mitochondrial OS=Homo sapiens OX=9606 GN=ACAA2 PE=1 SV=2	6	0.534284	0.719812	16.0103	13.4221	16.33	16.0375	15.4241	16.4432	16.0658	16.0302
	O94903	PLPHP_HUMAN Pyridoxal phosphate homeostasis protein OS=Homo sapiens OX=9606 GN=PLPBP PE=1 SV=1	3	0.53492	0.658042	16.6283	16.1742	14.7652	16.1914	16.2766	15.9664	15.8992	12.8223
	P36405	ARL3_HUMAN ADP-ribosylation factor-like protein 3 OS=Homo sapiens OX=9606 GN=ARL3 PE=1 SV=2	6	0.535154	0.875674	15.6013	16.3665	16.7095	15.9366	16.5633	16.4118	16.7322	16.1254
	Q9H267	VP33B_HUMAN Vacuolar protein sorting-associated protein 33B OS=Homo sapiens OX=9606 GN=VPS33B PE=1 SV=2	3	0.535188	1.32023	14.603	14.3798	15.9495	14.384	13.5942	15.5619	13.8742	15.2984
	P55327	TPD52_HUMAN Tumor protein D52 OS=Homo sapiens OX=9606 GN=TPD52 PE=1 SV=2	4	0.53663	0.787	17.2292	17.6786	17.7483	15.6719	16.8657	17.4028	17.8655	17.573
	Q96JB5	CK5P3_HUMAN CDK5 regulatory subunit-associated protein 3 OS=Homo sapiens OX=9606 GN=CDK5RAP3 PE=1 SV=2	5	0.536676	1.22846	17.0878	16.9503	16.8296	17.0579	15.2079	16.4391	16.4914	16.3568
	Q9Y5X3	SNX5_HUMAN Sorting nexin-5 OS=Homo sapiens OX=9606 GN=SNX5 PE=1 SV=1	6	0.537452	1.43434	17.0575	16.4557	17.874	16.814	16.1302	17.3365	14.2677	16.8047
	P31749	AKT1_HUMAN RAC-alpha serine/threonine-protein kinase OS=Homo sapiens OX=9606 GN=AKT1 PE=1 SV=2	3	0.537938	1.16885	14.6334	15.445	15.331	15.8078	14.9079	15.5759	15.9178	14.8618
	O75521	ECI2_HUMAN Enoyl-CoA delta isomerase 2, mitochondrial OS=Homo sapiens OX=9606 GN=ECI2 PE=1 SV=4	4	0.537958	0.915284	17.1786	17.6703	17.3858	16.8397	17.1985	17.1377	17.5764	17.1809
	Q13148	TADBP_HUMAN TAR DNA-binding protein 43 OS=Homo sapiens OX=9606 GN=TARDBP PE=1 SV=1	9	0.538181	0.79679	15.8304	16.3768	16.6621	16.8359	18.2036	16.6375	17.0599	16.5949
	Q15019	SEPT2_HUMAN Septin-2 OS=Homo sapiens OX=9606 GN=SEPTIN2 PE=1 SV=1	11	0.53869	1.08125	18.4015	18.5107	19.0055	18.8874	18.7556	18.9908	18.8067	19.0311
	O60884	DNJA2_HUMAN DnaJ homolog subfamily A member 2 OS=Homo sapiens OX=9606 GN=DNAJA2 PE=1 SV=1	13	0.538843	1.16125	16.9539	18.1882	17.9315	18.1906	18.1159	17.7959	18.4239	18.1131
	P43155	CACP_HUMAN Carnitine O-acetyltransferase OS=Homo sapiens OX=9606 GN=CRAT PE=1 SV=5	8	0.539424	1.06287	17.1493	17.6859	17.5305	17.5332	17.4447	17.3738	17.3066	17.19
	Q14254	FLOT2_HUMAN Flotillin-2 OS=Homo sapiens OX=9606 GN=FLOT2 PE=1 SV=2	6	0.539513	1.08205	17.9862	17.88	17.8685	17.6459	17.2589	17.9024	17.5671	17.7075
	Q14694	UBP10_HUMAN Ubiquitin carboxyl-terminal hydrolase 10 OS=Homo sapiens OX=9606 GN=USP10 PE=1 SV=2	6	0.539859	1.33099	16.1093	15.2635	15.3155	16.499	16.818	15.9213	14.1579	16.3668
	Q99700	ATX2_HUMAN Ataxin-2 OS=Homo sapiens OX=9606 GN=ATXN2 PE=1 SV=2	3	0.539908	1.20716	13.8441	13.7511	14.7042	14.994	14.6281	15.3146	14.8671	15.0702
	O00299	CLIC1_HUMAN Chloride intracellular channel protein 1 OS=Homo sapiens OX=9606 GN=CLIC1 PE=1 SV=4	8	0.540722	1.14877	20.0837	20.901	20.4325	20.6819	20.2482	20.7056	21.4386	20.7147
	Q9UPT8	ZC3H4_HUMAN Zinc finger CCCH domain-containing protein 4 OS=Homo sapiens OX=9606 GN=ZC3H4 PE=1 SV=3	7	0.541383	1.28087	16.477	14.7333	15.2046	15.9607	15.2225	16.2978	14.3533	15.6941
	Q9Y3Y2	CHTOP_HUMAN Chromatin target of PRMT1 protein OS=Homo sapiens OX=9606 GN=CHTOP PE=1 SV=2	2	0.541549	1.31743	18.1416	17.3803	18.2595	17.6264	16.9224	17.7581	15.6691	17.8187
	P10321	HLAC_HUMAN HLA class I histocompatibility antigen, C alpha chain OS=Homo sapiens OX=9606 GN=HLA-C PE=1 SV=3	4	0.541569	1.18401	18.9258	18.6149	19.8282	19.2986	18.7012	19.9788	18.9994	19.537
	O94919	ENDD1_HUMAN Endonuclease domain-containing 1 protein OS=Homo sapiens OX=9606 GN=ENDOD1 PE=1 SV=2	7	0.541642	0.768908	17.0626	15.1312	17.2781	16.9016	17.3759	17.1958	15.8489	16.8205
	Q96JG6	VPS50_HUMAN Syndetin OS=Homo sapiens OX=9606 GN=VPS50 PE=1 SV=3	5	0.541703	0.866429	15.2088	14.2859	14.701	15.4704	15.5271	15.2134	15.4901	15.1298
	P20339	RAB5A_HUMAN Ras-related protein Rab-5A OS=Homo sapiens OX=9606 GN=RAB5A PE=1 SV=2	1	0.542207	1.37407	15.3616	16.5535	17.1768	16.8403	15.2775	17.1322	18.0898	17.2134
	O60216	RAD21_HUMAN Double-strand-break repair protein rad21 homolog OS=Homo sapiens OX=9606 GN=RAD21 PE=1 SV=2	6	0.542573	0.66217	17.4824	13.8369	15.7433	17.3753	16.6971	15.7482	14.8639	15.4473
	Q5T1M5	FKB15_HUMAN FK506-binding protein 15 OS=Homo sapiens OX=9606 GN=FKBP15 PE=1 SV=2	9	0.542968	0.828503	16.5017	15.8627	16.2916	16.0145	17.5366	16.4687	15.7052	16.6036
	O15427	MOT4_HUMAN Monocarboxylate transporter 4 OS=Homo sapiens OX=9606 GN=SLC16A3 PE=1 SV=1	5	0.543001	0.73353	16.96	16.4602	18.7669	18.0622	19.283	18.6679	17.8525	17.8836
	Q96S97	MYADM_HUMAN Myeloid-associated differentiation marker OS=Homo sapiens OX=9606 GN=MYADM PE=1 SV=2	2	0.543402	1.39026	16.8805	15.9189	17.028	16.3872	13.998	16.6076	16.1636	17.0578
	O94906	PRP6_HUMAN Pre-mRNA-processing factor 6 OS=Homo sapiens OX=9606 GN=PRPF6 PE=1 SV=1	12	0.545656	1.33374	15.9556	14.9105	14.8973	15.7771	16.3324	16.2029	13.7027	15.6594
	Q9BWD1	THIC_HUMAN Acetyl-CoA acetyltransferase, cytosolic OS=Homo sapiens OX=9606 GN=ACAT2 PE=1 SV=2	8	0.546263	1.11019	18.1182	18.8972	18.6236	18.9951	18.7208	18.7262	19.2035	18.6508
	O75940	SPF30_HUMAN Survival of motor neuron-related-splicing factor 30 OS=Homo sapiens OX=9606 GN=SMNDC1 PE=1 SV=1	3	0.546566	1.2411	15.6679	15.9651	15.8537	15.5569	15.63	15.2369	13.8709	15.5101
	O43865	SAHH2_HUMAN S-adenosylhomocysteine hydrolase-like protein 1 OS=Homo sapiens OX=9606 GN=AHCYL1 PE=1 SV=2	1	0.547941	0.891662	17.4925	16.5631	17.1613	17.1297	17.4344	17.2334	16.561	17.0613
	Q9NUL3	STAU2_HUMAN Double-stranded RNA-binding protein Staufen homolog 2 OS=Homo sapiens OX=9606 GN=STAU2 PE=1 SV=2	2	0.548775	0.774806	16.2488	16.8544	16.4295	14.273	16.1222	16.2335	15.6136	15.5809
	Q9NSC5	HOME3_HUMAN Homer protein homolog 3 OS=Homo sapiens OX=9606 GN=HOMER3 PE=1 SV=2	3	0.549697	1.31353	16.3437	16.0882	15.592	15.8944	15.7424	15.5602	13.5982	15.3074
	Q12907	LMAN2_HUMAN Vesicular integral-membrane protein VIP36 OS=Homo sapiens OX=9606 GN=LMAN2 PE=1 SV=1	10	0.549822	2.0942	16.6839	18.0392	11.8292	18.0061	18.6686	16.8918	15.7901	14.3003
	Q96J02	ITCH_HUMAN E3 ubiquitin-protein ligase Itchy homolog OS=Homo sapiens OX=9606 GN=ITCH PE=1 SV=2	2	0.55044	0.693647	15.8216	13.6547	16.4822	16.0278	15.5134	15.9014	13.8688	13.9912
	Q9BZF1	OSBL8_HUMAN Oxysterol-binding protein-related protein 8 OS=Homo sapiens OX=9606 GN=OSBPL8 PE=1 SV=3	3	0.551775	1.45632	14.7773	16.1841	16.041	15.8507	14.5481	15.9916	13.6777	13.1869
	P34932	HSP74_HUMAN Heat shock 70 kDa protein 4 OS=Homo sapiens OX=9606 GN=HSPA4 PE=1 SV=4	30	0.551936	1.04897	19.3268	19.0663	19.0297	19.2289	18.881	19.1711	19.2276	19.2747
	Q8IVD9	NUDC3_HUMAN NudC domain-containing protein 3 OS=Homo sapiens OX=9606 GN=NUDCD3 PE=1 SV=3	2	0.552688	0.832611	17.4032	16.158	16.9564	16.1843	15.7673	16.3421	15.7666	16.152
	P62701	RS4X_HUMAN 40S ribosomal protein S4, X isoform OS=Homo sapiens OX=9606 GN=RPS4X PE=1 SV=2;sp	8	0.553038	1.2399	18.0673	19.3957	20.0678	19.1834	18.876	19.8404	19.9134	19.7459
	P43243	MATR3_HUMAN Matrin-3 OS=Homo sapiens OX=9606 GN=MATR3 PE=1 SV=2	24	0.553173	0.950805	19.4496	19.2943	19.6392	19.2761	19.4536	19.5228	19.1531	19.3111
	P60468	SC61B_HUMAN Protein transport protein Sec61 subunit beta OS=Homo sapiens OX=9606 GN=SEC61B PE=1 SV=2	3	0.553392	1.36922	15.6075	17.9945	16.7733	18.2535	17.9824	17.1663	18.6855	17.4477
	P47755	CAZA2_HUMAN F-actin-capping protein subunit alpha-2 OS=Homo sapiens OX=9606 GN=CAPZA2 PE=1 SV=3	8	0.553702	0.948945	18.7639	18.8876	18.5584	18.6187	19.0674	18.6674	18.7659	18.6795
	P28062	PSB8_HUMAN Proteasome subunit beta type-8 OS=Homo sapiens OX=9606 GN=PSMB8 PE=1 SV=3	4	0.554724	1.0669	17.4671	17.4354	17.1737	17.614	17.523	17.3418	17.029	17.1751
	P43487	RANG_HUMAN Ran-specific GTPase-activating protein OS=Homo sapiens OX=9606 GN=RANBP1 PE=1 SV=1	6	0.554946	0.898898	18.452	18.3767	17.9631	18.3023	18.9923	18.1305	18.0599	18.0427
	Q9GZL7	WDR12_HUMAN Ribosome biogenesis protein WDR12 OS=Homo sapiens OX=9606 GN=WDR12 PE=1 SV=2	5	0.555194	0.694566	16.1621	13.2764	16.7954	16.5961	15.4541	16.4261	16.3102	16.3199
	Q9H2J4	PDCL3_HUMAN Phosducin-like protein 3 OS=Homo sapiens OX=9606 GN=PDCL3 PE=1 SV=1	7	0.55702	1.08783	17.4098	16.9704	16.669	16.9547	16.541	17.0236	16.7509	16.9079
	O15382	BCAT2_HUMAN Branched-chain-amino-acid aminotransferase, mitochondrial OS=Homo sapiens OX=9606 GN=BCAT2 PE=1 SV=2	4	0.558052	0.812011	16.2968	15.2007	16.4465	16.6154	14.9097	15.5952	16.4542	15.4942
	P46779	RL28_HUMAN 60S ribosomal protein L28 OS=Homo sapiens OX=9606 GN=RPL28 PE=1 SV=3	4	0.558465	0.833916	19.7562	19.3087	18.7953	19.4103	20.6645	19.1928	19.0299	19.2861
	Q9UBC2	EP15R_HUMAN Epidermal growth factor receptor substrate 15-like 1 OS=Homo sapiens OX=9606 GN=EPS15L1 PE=1 SV=1	3	0.559058	0.735826	16.365	13.2663	15.6164	15.7127	15.6762	15.9244	14.7054	15.6892
	O95219	SNX4_HUMAN Sorting nexin-4 OS=Homo sapiens OX=9606 GN=SNX4 PE=1 SV=1	8	0.559653	1.10428	16.4473	16.3595	15.6562	16.1152	16.4213	16.1177	15.6579	16.1629
	P48651	PTSS1_HUMAN Phosphatidylserine synthase 1 OS=Homo sapiens OX=9606 GN=PTDSS1 PE=1 SV=1	3	0.559715	1.3045	14.9347	13.6137	15.4955	15.026	13.8939	15.7353	14.3795	15.8627
	Q9NSD9	SYFB_HUMAN Phenylalanine--tRNA ligase beta subunit OS=Homo sapiens OX=9606 GN=FARSB PE=1 SV=3	8	0.560208	1.06068	18.19	18.6771	18.4533	18.6783	18.7931	18.5014	18.6535	18.5731
	Q13217	DNJC3_HUMAN DnaJ homolog subfamily C member 3 OS=Homo sapiens OX=9606 GN=DNAJC3 PE=1 SV=1	4	0.561087	1.34449	14.314	15.6166	14.805	16.0821	16.2719	15.7352	14.1764	13.8416
	Q9NPD3	EXOS4_HUMAN Exosome complex component RRP41 OS=Homo sapiens OX=9606 GN=EXOSC4 PE=1 SV=3	3	0.561283	0.813738	15.6487	15.2307	13.8841	14.3362	15.2533	15.1133	15.0804	13.9968
	Q99829	CPNE1_HUMAN Copine-1 OS=Homo sapiens OX=9606 GN=CPNE1 PE=1 SV=1	6	0.561617	1.37047	17.1913	16.9988	16.8759	16.7345	17.2014	16.7396	14.155	16.7694
	O75844	FACE1_HUMAN CAAX prenyl protease 1 homolog OS=Homo sapiens OX=9606 GN=ZMPSTE24 PE=1 SV=2	5	0.561643	0.959495	17.3596	17.4522	17.2104	17.3979	17.4877	17.1919	17.5745	17.3516
	P18031	PTN1_HUMAN Tyrosine-protein phosphatase non-receptor type 1 OS=Homo sapiens OX=9606 GN=PTPN1 PE=1 SV=1	16	0.561777	1.06056	18.2178	18.3029	18.0167	18.5223	18.5041	18.184	18.0743	18.143
	Q7Z4H3	HDDC2_HUMAN 5-deoxynucleotidase HDDC2 OS=Homo sapiens OX=9606 GN=HDDC2 PE=1 SV=1	3	0.562025	0.936031	15.2311	15.1405	15.6253	15.565	15.7042	15.2669	15.2576	15.4643
	Q92575	UBXN4_HUMAN UBX domain-containing protein 4 OS=Homo sapiens OX=9606 GN=UBXN4 PE=1 SV=2	4	0.562549	0.882793	18.6225	17.7816	17.9085	17.8867	17.6613	17.5231	17.2919	17.5733
	Q9HD26	GOPC_HUMAN Golgi-associated PDZ and coiled-coil motif-containing protein OS=Homo sapiens OX=9606 GN=GOPC PE=1 SV=1	5	0.562748	1.18967	15.7748	14.9781	15.4648	15.3637	14.7365	15.3888	13.9914	15.2392
	Q9UBB9	TFP11_HUMAN Tuftelin-interacting protein 11 OS=Homo sapiens OX=9606 GN=TFIP11 PE=1 SV=1	3	0.564382	0.866325	15.2322	14.8009	14.4371	14.6526	15.1887	14.2257	13.9495	14.3004
	Q9Y678	COPG1_HUMAN Coatomer subunit gamma-1 OS=Homo sapiens OX=9606 GN=COPG1 PE=1 SV=1	19	0.564956	1.03849	17.5737	17.5441	17.2959	17.622	17.6303	17.418	17.3805	17.5142
	Q15007	FL2D_HUMAN Pre-mRNA-splicing regulator WTAP OS=Homo sapiens OX=9606 GN=WTAP PE=1 SV=2	3	0.565002	0.790111	16.2848	14.9067	14.3809	13.7577	14.5461	14.7365	15.0111	15.4625
	P15311	EZRI_HUMAN Ezrin OS=Homo sapiens OX=9606 GN=EZR PE=1 SV=4	15	0.565064	0.957608	19.1867	18.9604	19.2169	18.9578	19.2421	19.1873	18.9104	19.2006
	P49321	NASP_HUMAN Nuclear autoantigenic sperm protein OS=Homo sapiens OX=9606 GN=NASP PE=1 SV=2	15	0.56523	0.911867	18.6995	17.8373	18.1417	18.4108	18.5907	18.2941	17.9582	18.3156
	Q9H9A6	LRC40_HUMAN Leucine-rich repeat-containing protein 40 OS=Homo sapiens OX=9606 GN=LRRC40 PE=1 SV=1	5	0.565294	0.823	16.4228	15.4059	15.6682	15.2774	16.298	15.7405	14.4577	15.2987
	Q9BZD4	NUF2_HUMAN Kinetochore protein Nuf2 OS=Homo sapiens OX=9606 GN=NUF2 PE=1 SV=2	2	0.566755	0.83017	15.7269	15.1882	16.9835	15.5994	15.6022	15.548	14.9828	15.8857
	O75351	VPS4B_HUMAN Vacuolar protein sorting-associated protein 4B OS=Homo sapiens OX=9606 GN=VPS4B PE=1 SV=2	4	0.567347	1.27196	16.1762	15.2372	13.5944	15.6927	15.5315	15.8258	15.2257	15.1602
	Q14008	CKAP5_HUMAN Cytoskeleton-associated protein 5 OS=Homo sapiens OX=9606 GN=CKAP5 PE=1 SV=3	32	0.567724	0.969295	17.8125	17.7506	17.7104	17.8746	17.8967	17.7123	17.6938	17.5959
	Q99747	SNAG_HUMAN Gamma-soluble NSF attachment protein OS=Homo sapiens OX=9606 GN=NAPG PE=1 SV=1	3	0.569658	1.13264	15.0186	15.557	14.8369	15.166	15.9219	15.2068	14.6324	15.1988
	Q96PZ0	PUS7_HUMAN Pseudouridylate synthase 7 homolog OS=Homo sapiens OX=9606 GN=PUS7 PE=1 SV=2	9	0.569929	0.814922	16.7584	16.0706	16.0777	16.1253	16.9786	15.9299	14.9129	15.4207
	O00116	ADAS_HUMAN Alkyldihydroxyacetonephosphate synthase, peroxisomal OS=Homo sapiens OX=9606 GN=AGPS PE=1 SV=1	17	0.570331	0.968333	18.1445	18.3205	18.1194	18.1636	18.233	18.0587	18.2204	17.9888
	P33992	MCM5_HUMAN DNA replication licensing factor MCM5 OS=Homo sapiens OX=9606 GN=MCM5 PE=1 SV=5	18	0.57165	1.21694	17.4484	17.505	18.143	17.4405	17.7037	17.8355	15.9936	17.6407
	P32970	CD70_HUMAN CD70 antigen OS=Homo sapiens OX=9606 GN=CD70 PE=1 SV=2	7	0.571671	1.10314	17.2038	17.359	17.5228	17.7211	17.0493	17.8733	17.9217	17.3106
	Q8TEA8	DTD1_HUMAN D-aminoacyl-tRNA deacylase 1 OS=Homo sapiens OX=9606 GN=DTD1 PE=1 SV=2	3	0.572494	0.658955	18.2829	14.0145	14.1857	15.6224	16.1901	15.575	14.6512	15.6909
	Q15417	CNN3_HUMAN Calponin-3 OS=Homo sapiens OX=9606 GN=CNN3 PE=1 SV=1	10	0.572635	0.897111	19.5777	19.7707	19.7583	19.6026	20.3001	20.2145	20.5483	19.97
	Q96SZ5	AEDO_HUMAN 2-aminoethanethiol dioxygenase OS=Homo sapiens OX=9606 GN=ADO PE=1 SV=2	2	0.572675	0.75342	15.9518	16.7187	16.5324	13.9348	16.0387	15.998	16.5512	16.7888
	Q9NUQ8	ABCF3_HUMAN ATP-binding cassette sub-family F member 3 OS=Homo sapiens OX=9606 GN=ABCF3 PE=1 SV=2	5	0.572799	1.11359	15.7787	16.3159	16.4926	16.2167	15.607	16.342	16.6554	16.28
	O14979	HNRDL_HUMAN Heterogeneous nuclear ribonucleoprotein D-like OS=Homo sapiens OX=9606 GN=HNRNPDL PE=1 SV=3	5	0.572913	1.17518	18.4002	19.4477	19.6663	19.377	18.6839	19.6203	19.9941	19.231
	P27708	PYR1_HUMAN CAD protein OS=Homo sapiens OX=9606 GN=CAD PE=1 SV=3	27	0.57739	1.09084	16.593	16.9187	17.2822	17.0242	17.2641	17.2639	16.5701	17.0044
	Q9UG63	ABCF2_HUMAN ATP-binding cassette sub-family F member 2 OS=Homo sapiens OX=9606 GN=ABCF2 PE=1 SV=2	11	0.577747	1.04701	17.9534	17.9794	18.2838	17.9913	17.826	18.0749	17.8255	18.1084
	P12081	HARS1_HUMAN Histidine--tRNA ligase, cytoplasmic OS=Homo sapiens OX=9606 GN=HARS1 PE=1 SV=2	8	0.577799	1.18675	15.8955	17.6904	16.8487	17.2212	17.5839	16.8927	17.2448	16.7566
	Q6KCM7	SCMC2_HUMAN Calcium-binding mitochondrial carrier protein SCaMC-2 OS=Homo sapiens OX=9606 GN=SLC25A25 PE=1 SV=1	3	0.579203	1.24973	14.0442	15.0285	13.0385	14.8379	15.1025	13.8074	13.8709	13.6688
	P27448	MARK3_HUMAN MAP/microtubule affinity-regulating kinase 3 OS=Homo sapiens OX=9606 GN=MARK3 PE=1 SV=5	1	0.579231	1.17465	13.8552	13.8535	14.7782	14.6026	14.7958	14.8769	13.4822	14.5072
	O43681	GET3_HUMAN ATPase GET3 OS=Homo sapiens OX=9606 GN=GET3 PE=1 SV=2	6	0.579326	0.924874	18.7368	18.4516	18.0514	18.1877	18.4688	18.0649	18.0224	18.1244
	Q13619	CUL4A_HUMAN Cullin-4A OS=Homo sapiens OX=9606 GN=CUL4A PE=1 SV=3	5	0.579836	0.856361	16.057	15.3909	15.2984	15.2405	15.5021	14.9079	14.3531	14.7764
	Q6VY07	PACS1_HUMAN Phosphofurin acidic cluster sorting protein 1 OS=Homo sapiens OX=9606 GN=PACS1 PE=1 SV=2	2	0.580722	0.918844	16.0311	15.529	15.87	15.6019	15.4526	15.4674	15.1277	15.3946
	P15374	UCHL3_HUMAN Ubiquitin carboxyl-terminal hydrolase isozyme L3 OS=Homo sapiens OX=9606 GN=UCHL3 PE=1 SV=1	7	0.582869	0.760376	17.8152	15.0353	17.2514	17.5379	17.2666	17.9443	17.3218	17.5566
	P60866	RS20_HUMAN 40S ribosomal protein S20 OS=Homo sapiens OX=9606 GN=RPS20 PE=1 SV=1	2	0.58351	1.35078	17.283	19.533	20.2871	19.9065	20.1071	20.1667	20.2699	20.0763
	P29218	IMPA1_HUMAN Inositol monophosphatase 1 OS=Homo sapiens OX=9606 GN=IMPA1 PE=1 SV=1	4	0.583514	0.891904	15.8479	16.2683	16.5582	16.2038	16.6702	16.6565	17.1374	16.425
	Q92526	TCPW_HUMAN T-complex protein 1 subunit zeta-2 OS=Homo sapiens OX=9606 GN=CCT6B PE=1 SV=5	1	0.584	0.539109	16.6751	13.6848	17.8799	14.5515	16.0825	18.501	13.1599	13.4947
	P55786	PSA_HUMAN Puromycin-sensitive aminopeptidase OS=Homo sapiens OX=9606 GN=NPEPPS PE=1 SV=2	15	0.584026	1.0532	18.6975	19.2706	19.0614	18.948	18.9888	19.0756	19.1854	18.9381
	O95456	PSMG1_HUMAN Proteasome assembly chaperone 1 OS=Homo sapiens OX=9606 GN=PSMG1 PE=1 SV=1	3	0.584242	0.916972	16.2407	16.519	15.9073	16.3248	16.4457	15.7806	16.3828	15.8519
	Q9Y496	KIF3A_HUMAN Kinesin-like protein KIF3A OS=Homo sapiens OX=9606 GN=KIF3A PE=1 SV=4	3	0.584374	1.13336	14.5129	14.3152	14.5097	15.1641	14.6824	15.0521	15.428	15.324
	Q96CN7	ISOC1_HUMAN Isochorismatase domain-containing protein 1 OS=Homo sapiens OX=9606 GN=ISOC1 PE=1 SV=3	2	0.584828	1.15098	15.0549	15.5783	15.9153	15.5004	16.0611	15.6969	14.6018	15.6691
	P07384	CAN1_HUMAN Calpain-1 catalytic subunit OS=Homo sapiens OX=9606 GN=CAPN1 PE=1 SV=1	15	0.585146	1.08881	17.4775	17.987	17.6137	17.1926	17.1446	17.6027	17.7763	17.7207
	P61326	MGN_HUMAN Protein mago nashi homolog OS=Homo sapiens OX=9606 GN=MAGOH PE=1 SV=1;sp	3	0.586503	0.824671	17.921	18.0714	16.7423	17.554	18.8342	17.0869	17.576	17.2488
	Q9UBQ7	GRHPR_HUMAN Glyoxylate reductase/hydroxypyruvate reductase OS=Homo sapiens OX=9606 GN=GRHPR PE=1 SV=1	8	0.587216	0.882343	17.5592	17.28	17.5419	17.1973	16.573	17.2988	18.0789	17.2545
	Q9NZJ7	MTCH1_HUMAN Mitochondrial carrier homolog 1 OS=Homo sapiens OX=9606 GN=MTCH1 PE=1 SV=1	2	0.587479	1.24509	15.1426	14.8935	16.3249	15.6552	13.9473	15.982	15.6024	15.7515
	Q86VM9	ZCH18_HUMAN Zinc finger CCCH domain-containing protein 18 OS=Homo sapiens OX=9606 GN=ZC3H18 PE=1 SV=2	3	0.588037	0.856671	17.5945	16.0003	16.09	16.5591	16.082	16.4227	16.8075	16.6991
	O75934	SPF27_HUMAN Pre-mRNA-splicing factor SPF27 OS=Homo sapiens OX=9606 GN=BCAS2 PE=1 SV=1	3	0.588878	0.87072	17.067	16.5208	16.5318	16.5507	16.8931	16.5347	15.7213	15.8081
	O43491	E41L2_HUMAN Band 4.1-like protein 2 OS=Homo sapiens OX=9606 GN=EPB41L2 PE=1 SV=1	19	0.588929	0.945854	18.4803	18.0556	18.0927	18.1325	18.0094	17.9685	17.8472	17.9517
	Q96A49	SYAP1_HUMAN Synapse-associated protein 1 OS=Homo sapiens OX=9606 GN=SYAP1 PE=1 SV=1	8	0.589346	0.924155	16.7756	16.5408	16.645	16.256	16.4395	16.8338	17.0992	16.8735
	Q13310	PABP4_HUMAN Polyadenylate-binding protein 4 OS=Homo sapiens OX=9606 GN=PABPC4 PE=1 SV=1	7	0.590661	0.734489	16.5025	14.5621	17.2205	17.4999	17.3103	17.4426	17.8176	17.5655
	P27824	CALX_HUMAN Calnexin OS=Homo sapiens OX=9606 GN=CANX PE=1 SV=2	33	0.591175	1.05833	21.5957	21.4536	21.0565	21.4727	21.4121	21.2116	21.0828	21.3364
	P62306	RUXF_HUMAN Small nuclear ribonucleoprotein F OS=Homo sapiens OX=9606 GN=SNRPF PE=1 SV=1	2	0.59178	0.768124	17.5961	14.4734	16.4808	16.6769	16.0997	16.7785	16.0364	16.7619
	P39656	OST48_HUMAN Dolichyl-diphosphooligosaccharide--protein glycosyltransferase 48 kDa subunit OS=Homo sapiens OX=9606 GN=DDOST PE=1 SV=4	11	0.591792	0.953698	18.3217	18.5161	18.4859	18.4206	18.3637	18.3366	18.8283	18.4527
[truncated: 671 more rows]
