# Supplementary material for: Chaperone-Mediated Autophagy Controls Proteomic and Transcriptomic Pathways to Maintain Glioma Stem Cell Activity
Source: Oxford University Press journal article supplement (doi:10.1158/0008-5472.can-21-2161), 2022-02-07
Supplement: can-21-2161_suppl_table_3_suppst3.xlsx [file can-21-2161_suppl_table_3_suppst3.xlsx]

## Sheet: RNAseq pGK shL2A GNS166
			Raw data (count)						Raw data (FPKM)
	Name RNA	Ensembl ID	pGK-1	pGK-2	pGK-3	shL2A-1	shL2A-2	shL2A-3	pGK-1	pGK-2	pGK-3	shL2A-1	shL2A-2	shL2A-3	FDR	log2FC	regulated
	PDIA6	ENSG00000143870	10440	9719	9596	4860	5391	4854	137652	100845	113568	625025	519258	569857	9.99E-09	-1094573478	down
	SLC22A23	ENSG00000137266	4314	4689	4386	1553	2397	2010	273559	236979	261421	114449	121519	120602	9.95E-13	-1291960493	down
	MSN	ENSG00000147065	37643	43529	37408	15702	20282	18105	204435	186.64	188928	808541	843788	904796	9.81E-15	-1243247775	down
	HDAC4	ENSG00000068024	971	1015	966	440	511	458	366519	496516	437019	275024	365938	333591	9.78E-10	-1179390613	down
	RPSAP58	ENSG00000225178	2286	1732	1109	981	559	548	653236	374111	287474	256493	123297	141327	9.78E-05	-1389939027	down
	TXNRD1	ENSG00000198431	51228	58620	72315	23606	33533	28522	384767	346022	520317	137108	191266	191963	9.74E-10	-1209034786	down
	AMIGO2	ENSG00000139211	4082	4639	5261	971	1461	1448	306046	280103	37288	76675	904315	108967	9.73E-22	-196634593	down
	HNRNPA3	ENSG00000170144	18305	19252	16895	8962	9765	9628	193147	132536	169.92	832847	61634	838872	9.67E-09	-1047090804	down
	IPP	ENSG00000197429	880	896	734	319	490	417	756128	64164	729853	336592	416762	455503	9.66E-08	-1159108015	down
	RAB7B	ENSG00000276600	470	745	738	185	340	234	543696	689213	794893	204216	311532	266235	9.52E-10	-1483194146	down
	CPA4	ENSG00000128510	1564	3227	2068	645	904	679	176897	273171	197237	588728	768155	62782	9.51E-15	-1708762238	down
	TLNRD1	ENSG00000140406	718	732	544	341	342	273	390477	313102	289563	179649	150813	148271	9.51E-07	-1169098206	down
	KNL1	ENSG00000137812	2994	3456	1879	1157	1280	1377	880316	823075	559943	494682	305785	402485	9.50E-07	-1221824526	down
	ENHO	ENSG00000168913	459	447	447	249	191	199	206169	161284	172533	919112	64914	841577	9.46E-06	-1178099587	down
	LOXL1	ENSG00000129038	1617	1500	1930	750	612	505	316427	214081	336847	192412	996866	958633	9.43E-10	-1540543601	down
	CDC42SE2	ENSG00000158985	2457	2532	2405	1167	1197	1348	16793	139064	145268	749484	675839	85173	9.43E-08	-1095556354	down
	SUSD2	ENSG00000099994	57	68	64	18	11	23	0.501027	0.442043	0.488547	0.158614	0.0696839	0.167379	9.43E-05	-1938682062	down
	CORO1C	ENSG00000110880	29481	32393	26790	12824	13722	12160	244132	216924	206077	860292	108372	966063	9.34E-14	-1300777241	down
	CRYZ	ENSG00000116791	1218	1397	1458	638	697	791	204814	161393	23326	917299	786543	112075	9.34E-07	-1037229345	down
	FLG2	ENSG00000143520	17	59	37	1	5	8	0.0704626	0.141648	0.122375	0.00432573	0.0107866	0.0256708	9.27E-05	-3077820468	down
	HK1	ENSG00000156515	18765	17774	19663	9994	9517	10109	115409	852744	109937	569533	448914	562772	9.25E-07	-1028960893	down
	DKK3	ENSG00000050165	22478	21440	27445	9316	8250	9080	192239	145872	221737	794196	543799	707126	9.23E-12	-1522643418	down
	AL583856.1	ENSG00000232389	376	357	287	188	199	155	822304	628559	582976	375898	331952	311737	9.22E-05	-1028010825	down
	LPCAT1	ENSG00000153395	219	61	65	19	33	6	521254	0.298499	0.471778	0.112112	0.135697	0.201978	9.19E-06	-2805946816	down
	CAPS	ENSG00000105519	2010	1303	1805	536	535	547	438148	223978	341756	973498	867111	110779	9.17E-12	-1789814492	down
	NQO1	ENSG00000181019	7174	10556	10281	4147	4509	3289	159502	185052	207862	856492	774904	642236	9.08E-12	-1327532066	down
	CD24	ENSG00000272398	8698	6652	5378	3242	3232	3044	125913	819669	734832	380909	470193	453604	9.07E-07	-1243817665	down
	SNHG14	ENSG00000224078	3008	3208	2495	1115	1985	1515	163055	129107	129439	788082	852714	905411	9.05E-07	-1049582091	down
	NNT	ENSG00000112992	7745	6729	6016	3283	3802	3677	413346	293861	310775	214553	194091	203669	9.01E-07	-1048657441	down
	IL11	ENSG00000095752	3069	5638	3154	1272	2605	1084	401971	556631	386107	150961	269867	128266	8.96E-07	-1384760287	down
	KLHDC7A	ENSG00000179023	824	685	935	417	357	393	40244	284205	425466	209289	14819	180906	8.88E-06	-1174175052	down
	BRI3BP	ENSG00000184992	3305	3021	1667	1194	1131	965	172163	128131	86116	530176	477099	49925	8.87E-07	-1389615223	down
	ADAMTS1	ENSG00000154734	1795	2582	4374	678	1170	1144	111992	114328	27199	307739	633831	652621	8.86E-08	-166607337	down
	LGALS1	ENSG00000100097	39578	42653	33820	26078	17606	15588	1994.75	1637.12	1587.12	1162.16	633.24	678383	8.86E-05	-1052397904	down
	AURKA	ENSG00000087586	12355	13949	8809	5419	3548	3356	133649	121477	906361	540612	305147	351422	8.83E-09	-1586767344	down
	SAPCD2	ENSG00000186193	1324	1792	974	498	609	378	119247	129796	806217	492879	464893	342376	8.81E-11	-1566850368	down
	P4HB	ENSG00000185624	36656	37344	30338	18611	20431	16576	476499	388.35	362004	292089	255099	243802	8.80E-08	-1020312149	down
	TIMELESS	ENSG00000111602	8117	7649	5664	4020	3868	3487	379707	287877	25108	197702	146388	159369	8.80E-06	-1021438704	down
	RNF170	ENSG00000120925	637	638	619	338	312	340	543583	481421	566702	263807	263285	33797	8.79E-06	-1036379353	down
	PGAP3	ENSG00000161395	609	459	610	302	190	263	687393	421431	602282	364982	192868	271139	8.79E-05	-1247861694	down
	KIF3C	ENSG00000084731	1895	1998	2078	819	901	944	105398	775748	115785	436601	348035	560384	8.76E-11	-1270282	down
	HMGCR	ENSG00000113161	11533	9919	7641	4593	5162	4726	737486	566435	487813	309544	284884	306132	8.75E-07	-1126538484	down
	GPC1	ENSG00000063660	7585	6911	8093	2305	2508	2330	491782	377703	471595	140467	128546	150768	8.72E-20	-1777836665	down
	THBS1	ENSG00000137801	19964	22040	22689	4797	6213	6423	834972	791799	98632	190358	242849	25815	8.71E-28	-2002002475	down
	OSMR	ENSG00000145623	1979	2236	2403	684	822	1042	108434	103658	124957	37767	45721	627074	8.69E-11	-1477309938	down
	G6PC3	ENSG00000141349	6552	6489	5084	3980	3113	2580	119741	967334	873416	732064	461388	449362	8.68E-05	-1002610776	down
	PTPRF	ENSG00000142949	9265	9868	10039	3546	4889	4370	32813	275816	320957	13688	138931	150063	8.67E-14	-1307167076	down
	STEAP3	ENSG00000115107	2629	2503	2602	573	734	580	195377	15.05	169067	404843	469668	422488	8.63E-32	-2160823894	down
	CPVL	ENSG00000106066	2085	1946	2013	1014	824	892	261444	203061	236824	121109	783427	107664	8.63E-08	-1244985867	down
	WDR1	ENSG00000071127	35971	33806	29283	17050	19183	15782	243254	186725	187.9	100856	114728	100233	8.61E-08	-1047799688	down
	SQLE	ENSG00000104549	8747	7887	5304	3842	3926	3316	673255	476438	378332	330501	251384	248837	8.58E-06	-1099362732	down
	CNTN1	ENSG00000018236	4421	4092	2696	1702	2018	1685	48815	372967	280321	195647	189167	153013	8.56E-07	-1172306416	down
	COL1A2	ENSG00000164692	7150	7834	11331	2318	2830	2535	371415	321935	495975	161947	109522	124289	8.49E-18	-1891896869	down
	PPIAP29	ENSG00000214975	711	774	483	296	417	209	320931	301674	217375	80653	158477	207581	8.46E-06	-1225413688	down
	FADS3	ENSG00000221968	3307	3281	3143	1877	1782	1503	42349	308085	36882	208063	146356	173865	8.43E-07	-1021950278	down
	ERLIN2	ENSG00000147475	5292	5772	4198	2124	3057	2706	329847	305901	267843	11726	182605	172364	8.36E-08	-1069849293	down
	LRP8	ENSG00000157193	6089	5131	4095	1642	1205	1549	405582	303401	253959	107686	67113	956081	8.33E-13	-1895368878	down
	GLIPR1	ENSG00000139278	3275	3980	4676	1303	1198	1252	641522	670748	771691	235937	196918	197785	8.32E-17	-1761151744	down
	GINS4	ENSG00000147536	1688	2129	1080	863	891	838	264728	280209	157847	120675	142779	132918	8.32E-05	-100773851	down
	EIF4A1P10	ENSG00000229132	1009	1012	737	507	506	420	198657	151259	134423	938352	772501	774281	8.28E-06	-1052585749	down
	OLFML2A	ENSG00000185585	5216	3615	6432	1929	1484	1760	194721	11464	224045	71819	45758	640587	8.25E-09	-16709094	down
	AHCY	ENSG00000101444	11655	10649	8513	5515	5559	4575	137337	100922	952886	61.93	510329	513978	8.25E-07	-1091990406	down
	TNC	ENSG00000041982	52459	42275	33852	7627	7925	7178	166286	110845	100804	291899	216106	230321	8.21E-31	-2620838388	down
	ENTPD1	ENSG00000138185	345	401	368	207	178	207	246651	266879	335596	12361	105817	218433	8.19E-05	-1001281181	down
	RAC3	ENSG00000169750	1299	1199	1321	657	523	594	30919	221923	292419	147211	96218	12833	8.15E-07	-1203831355	down
	MXD3	ENSG00000213347	2950	2485	1572	1118	644	582	503152	342866	294827	183421	953557	977309	8.14E-07	-1668688937	down
	AL365181.3	ENSG00000272405	1591	1989	2082	657	1283	952	119211	120803	14341	51041	748941	678098	8.14E-07	-1101348872	down
	RFLNA	ENSG00000178882	450	788	444	152	238	166	570835	719477	508035	247927	216532	183784	8.11E-12	-1696241178	down
	CTSB	ENSG00000164733	17537	21697	21683	8683	11866	9720	191156	186656	216152	83059	100336	991058	8.08E-12	-1123086523	down
	GNPTAB	ENSG00000111670	2351	2077	1651	678	787	789	102616	866271	739165	337644	313162	40723	8.06E-12	-1548742621	down
	ANXA2P2	ENSG00000231991	6130	5620	4922	2882	2166	1743	147225	105.38	110591	622538	398426	379953	8.04E-08	-1395946804	down
	GALC	ENSG00000054983	284	333	339	112	191	168	26018	309691	271815	113528	159397	14222	8.04E-06	-1143015296	down
	SCG2	ENSG00000171951	15160	11125	9469	6505	6125	6216	130525	764511	763519	522818	408376	495486	8.04E-05	-1042820263	down
	CENPF	ENSG00000117724	19510	21900	16360	7074	7951	9265	713252	597027	514946	515237	191308	265813	8.03E-11	-1347129234	down
	LINC00452	ENSG00000229373	252	307	162	89	79	65	184959	166393	0.923739	0.635441	0.26098	0.542337	8.03E-08	-1721126934	down
	IDH2	ENSG00000182054	5610	5077	4056	3110	2343	2241	685053	512349	484171	379718	230788	267697	8.03E-05	-1035635778	down
	EBP	ENSG00000147155	10445	8789	6091	5131	3740	3158	300014	189372	163305	134268	78182	786806	8.02E-05	-1175895445	down
	SIAE	ENSG00000110013	1079	964	1083	298	332	316	872468	611984	793862	240957	220709	245369	8.00E-18	-1842761154	down
	CTSF	ENSG00000174080	1764	2152	2718	914	1223	1084	211073	207715	279391	113393	120929	123678	8.00E-08	-1156245217	down
	ANLN	ENSG00000011426	19242	22807	13642	9925	9097	9652	116501	103219	822752	509196	433816	506427	7.99E-06	-1043925303	down
	PCDH18	ENSG00000189184	2595	2308	2270	1158	1095	1401	153571	129049	131595	856157	580341	873731	7.97E-06	-1075853818	down
	TMEM154	ENSG00000170006	2915	3297	2548	875	1100	1163	109958	122185	102646	276762	421809	546095	7.94E-16	-1585797882	down
	LPCAT2	ENSG00000087253	3689	2884	2263	704	1020	1008	26221	221359	177248	413818	82082	891701	7.94E-13	-1827300151	down
	CALM3	ENSG00000160014	13766	15704	11084	6838	7126	5748	203513	191234	156075	953312	963212	890655	7.94E-09	-1143562024	down
	PLOD2	ENSG00000152952	7342	7345	7244	3149	3093	3565	519422	395317	486157	197686	169308	237884	7.90E-10	-1261680711	down
	CYB5R2	ENSG00000166394	3111	4797	3322	1712	1960	1448	546328	676429	541756	299049	277803	236471	7.89E-11	-1226269336	down
	STAG3L5P	ENSG00000242294	540	533	441	164	295	275	291055	265687	258738	186044	277723	308699	7.89E-06	-1173840991	down
	PLEKHB1	ENSG00000021300	472	349	698	223	154	238	793535	39297	846091	303857	175139	342769	7.89E-05	-1403173393	down
	TNFSF9	ENSG00000125657	926	1143	1633	667	568	630	143492	135216	221429	964962	684779	905456	7.87E-05	-1078736126	down
	FRMD5	ENSG00000171877	4843	4201	3981	2647	1942	2262	293704	205917	222979	155658	977104	12359	7.81E-05	-1022346709	down
	LAMB1	ENSG00000091136	13101	12830	11041	4516	4847	4164	637428	521166	53.88	295229	243117	249815	7.80E-17	-156327841	down
	SEMA6A	ENSG00000092421	1148	1402	873	433	598	565	773257	768839	568732	270295	333033	387305	7.74E-08	-1206590782	down
	ACOX2	ENSG00000168306	245	249	241	104	149	108	496191	509381	438033	277791	287894	255334	7.73E-06	-1152676762	down
	KIF2C	ENSG00000142945	9638	9882	6847	5526	3255	3575	897085	708131	583665	468161	249885	312672	7.72E-05	-1168579643	down
	PTTG1	ENSG00000164611	10074	10786	7878	6307	4452	3909	342.97	287.06	249098	197594	116552	121624	7.72E-05	-1055626217	down
	DSG2	ENSG00000046604	3079	2992	3620	1136	1913	1781	13.55	10376	143282	493148	643171	733412	7.70E-07	-1136128293	down
	ACTG2	ENSG00000163017	92	83	97	23	50	14	208123	132702	277631	0.521381	0.700814	0.232913	7.66E-05	-1815018831	down
	NLGN4X	ENSG00000146938	1231	1088	938	406	453	545	605834	495267	510009	179101	20355	256194	7.64E-08	-1324867631	down
	LINC01551	ENSG00000186960	1464	1793	1247	756	601	630	366324	373311	307967	196915	105441	141018	7.64E-08	-1261267295	down
	TRIM29	ENSG00000137699	297	258	316	156	156	132	573734	514982	611487	283893	264092	243301	7.63E-05	-1090171881	down
	IMPA2	ENSG00000141401	404	457	552	196	189	184	858898	892826	112188	445261	299198	467939	7.57E-09	-141379749	down
	NDC1	ENSG00000058804	3033	3468	2052	1447	1681	1432	128036	129705	847153	596588	570786	662611	7.57E-06	-1012401809	down
	FUCA1	ENSG00000179163	4806	5103	5633	2129	2219	2014	50242	418264	527176	203858	17426	190975	7.54E-14	-1396045175	down
	DST	ENSG00000151914	88676	80613	84552	30779	42230	42327	213.59	155205	198771	132375	728437	88557	7.53E-10	-1261861121	down
	THY1	ENSG00000154096	5968	8008	7749	3170	3318	3091	123497	130683	150676	540344	550459	62844	7.52E-13	-1275469547	down
	SHROOM2	ENSG00000146950	3934	4352	3437	1607	1892	1705	261395	229427	214946	887677	95008	888509	7.52E-13	-1279855011	down
	IQGAP3	ENSG00000183856	7475	8873	5463	2731	2774	2610	26545	264042	191349	922234	76601	967185	7.52E-13	-1520609189	down
	SH3PXD2A	ENSG00000107957	4168	5161	4003	1765	2441	2241	931551	934374	833177	344236	521329	534113	7.52E-11	-1156277824	down
	CD9	ENSG00000010278	8258	7238	7698	3580	3085	2954	154458	107764	135812	633127	458303	510794	7.51E-10	-1376643697	down
	CYP4V2	ENSG00000145476	2207	1807	2141	823	895	1039	193278	129178	186079	67394	633583	883061	7.50E-08	-1274692401	down
	RPA1	ENSG00000132383	9960	9577	7469	4301	5282	4306	805468	66701	593954	329021	314461	350377	7.46E-08	-108024082	down
	RAB26	ENSG00000167964	129	186	213	56	70	68	321479	25739	400592	126077	0.90502	121072	7.46E-07	-1545925803	down
	LAMC1	ENSG00000135862	17670	22267	16893	6567	11440	8448	688983	792718	63228	261391	404286	305063	7.44E-11	-1227400755	down
	CCDC9B	ENSG00000188549	8158	8543	7329	3994	3905	3452	490058	416703	44696	274558	22279	207492	7.43E-10	-1185822328	down
	DOCK1	ENSG00000150760	3612	3177	3445	1239	1428	1637	174864	139947	167388	601466	617915	791391	7.43E-10	-136415905	down
	SORCS3	ENSG00000156395	778	1035	821	225	462	366	340642	366558	333566	0.96055	154437	14718	7.36E-10	-144694363	down
	PRSS12	ENSG00000164099	27225	18651	24017	9486	6176	7970	131428	749066	109923	452116	247028	377676	7.36E-09	-1665915238	down
	CD63	ENSG00000135404	46147	42547	35240	22958	20131	17065	1188.12	882143	856.53	555477	386883	405388	7.34E-07	-1149181997	down
	TPGS2	ENSG00000134779	11951	11531	9310	5615	4490	4492	182825	141982	135587	808912	586812	648316	7.31E-08	-1263294096	down
	DPH6	ENSG00000134146	352	341	351	184	190	125	146707	112028	129948	706914	518124	447264	7.31E-06	-1183761711	down
	COL22A1	ENSG00000169436	2957	2756	3515	1349	1654	1564	262286	203935	246684	136831	124691	119825	7.29E-08	-1135519435	down
	GPM6B	ENSG00000046653	8812	8088	7849	2743	2635	3198	903539	681691	749975	254012	238347	299172	7.28E-14	-1631859879	down
	MAMLD1	ENSG00000013619	3143	4503	2031	1002	1406	1148	174561	189884	108554	598466	601868	598058	7.27E-10	-1542826716	down
	FBXO32	ENSG00000156804	23230	23355	39810	11806	10233	13174	197958	180725	309846	949508	865132	102303	7.25E-07	-1391043987	down
	SRPX	ENSG00000101955	1125	1585	1495	412	464	395	142268	150421	169214	569553	45549	467161	7.24E-23	-1824092071	down
	MAVS	ENSG00000088888	16574	19823	18067	7021	11200	9372	309388	291188	311797	126969	160071	161658	7.24E-10	-1101702454	down
	DNAJC22	ENSG00000178401	1489	1459	1373	674	817	758	113599	906716	993335	444885	445951	495293	7.23E-08	-1058481951	down
	DYSF	ENSG00000135636	111	181	143	60	66	45	0.501154	0.790721	0.908648	0.313035	0.213347	0.212953	7.20E-06	-1441761929	down
	BCAM	ENSG00000187244	4831	4282	5641	2100	1807	1915	47665	333624	518743	208446	166811	223344	7.19E-10	-1446461346	down
	ADCY1	ENSG00000164742	836	1410	1288	351	663	538	399845	491594	495835	155362	268329	187097	7.18E-08	-1298723109	down
	AC087222.1	ENSG00000262663	273	286	280	85	146	117	130986	981255	104745	272465	501086	488505	7.15E-08	-1398886638	down
	MICAL2	ENSG00000133816	4035	6081	4239	1363	3343	1900	266174	334526	289083	875335	195506	151052	7.11E-07	-1257668396	down
	DUSP23	ENSG00000158716	356	397	333	165	219	148	155358	133469	128662	650146	706908	620593	7.09E-07	-1150150806	down
	TBC1D16	ENSG00000167291	2911	3342	3989	1552	1912	1790	909926	759766	106563	396167	543001	519839	7.08E-08	-1073843264	down
	ADAMTSL1	ENSG00000178031	7325	7437	6284	3278	3388	2875	30606	281541	285804	164561	113675	107058	7.06E-11	-1250432745	down
	NEK6	ENSG00000119408	15111	12138	13944	6054	6126	6834	155679	943176	128575	578408	464743	588461	7.06E-08	-1230357929	down
	PLP2	ENSG00000102007	16256	14869	11149	8972	6738	5329	344635	250257	223644	180657	112267	105551	7.06E-05	-1106466721	down
	SYNJ2	ENSG00000078269	9013	10900	7157	3789	5446	4248	410671	429076	34478	251536	287971	271854	7.01E-09	-1120412261	down
	TMEM270	ENSG00000175877	163	169	300	62	66	75	522738	361142	695827	179403	117659	245334	6.99E-07	-1747652008	down
	MLC1	ENSG00000100427	695	492	848	205	189	349	458181	266375	568358	138883	117006	202746	6.95E-06	-155932349	down
	HNRNPA3P5	ENSG00000236565	109	145	90	41	37	40	0.951701	0.69517	0.823693	0.462557	0.291326	0.28758	6.95E-06	-1629749893	down
	TK2	ENSG00000166548	1154	1054	1045	483	616	535	141258	101733	118041	68488	634333	705673	6.93E-08	-1117740264	down
	MAGT1	ENSG00000102158	7471	6657	6684	3351	3826	3897	471974	360077	415942	17505	225699	23101	6.87E-07	-1026857558	down
	HNRNPA3P6	ENSG00000213300	166	238	187	88	107	75	352214	38315	368879	156264	15788	118718	6.87E-06	-1233701399	down
	GANAB	ENSG00000089597	36495	37383	31211	18832	19988	17217	210299	178.28	171199	100158	930917	997512	6.86E-08	-1016491536	down
	CYB5R3	ENSG00000100243	15988	16344	13749	8334	7562	6814	178362	144186	142678	877693	642162	692008	6.86E-08	-1121746103	down
	AL121772.3	ENSG00000276952	419	357	332	43	110	147	149403	100778	115194	15159	332126	46081	6.84E-08	-2017427415	down
	ERGIC3	ENSG00000125991	15424	15820	14706	9584	7743	6723	274559	224303	245113	165626	110189	113487	6.82E-06	-1030512311	down
	IGSF3	ENSG00000143061	3456	3235	4031	1095	1736	1652	113488	912698	12916	353558	470478	53136	6.81E-10	-1388500233	down
	TIMP1	ENSG00000102265	12059	14042	12322	6455	6601	5373	338743	308708	321016	167661	138297	138524	6.80E-11	-1162443149	down
	PARP1	ENSG00000143799	16689	15472	10928	4952	5120	4514	881219	67503	536968	251406	22238	240602	6.78E-14	-1675129228	down
	RNF141	ENSG00000110315	1179	1387	1194	509	813	660	113208	122866	116127	478299	806829	627225	6.76E-08	-1045211869	down
	EEF2K	ENSG00000103319	1696	1616	2075	832	918	954	819303	548307	784364	29858	363761	356138	6.76E-07	-1106981532	down
	IDI1	ENSG00000067064	6324	5338	4163	2846	2328	2402	792503	543015	51987	342577	241328	280568	6.76E-06	-1166457043	down
	CHST6	ENSG00000183196	1596	1476	1363	250	384	351	68555	492292	606226	120957	151266	164896	6.74E-27	-2299899023	down
	TMEM35A	ENSG00000126950	144	290	300	68	107	106	184867	290637	337894	0.915502	120825	122813	6.74E-06	-1478671367	down
	COL18A1	ENSG00000182871	8541	5746	7117	2202	1659	1856	509651	283199	392034	175437	810623	111132	6.73E-14	-2016438324	down
	CD74	ENSG00000019582	1892	2352	4535	704	1156	1615	325216	318118	699227	117451	152047	263502	6.70E-05	-1445847693	down
	CALB1	ENSG00000104327	623	1355	395	284	422	228	967953	164409	57404	360835	546003	4468	6.69E-05	-1428729475	down
	GNB4	ENSG00000114450	2404	2159	2397	960	1166	1327	205965	149822	186968	69404	857485	101472	6.68E-07	-1126986154	down
	TENM4	ENSG00000149256	129	188	129	25	65	51	0.360731	0.400988	0.48997	0.192667	0.418756	0.378675	6.65E-07	-1782612515	down
	SLC16A2	ENSG00000147100	2818	4629	2612	1195	1484	1087	171218	214251	146511	69452	716843	650608	6.61E-13	-1508429275	down
	NUP210	ENSG00000132182	15320	12090	11675	6545	5819	6975	423228	270383	307292	174796	124456	178345	6.59E-06	-112339514	down
	CCL26	ENSG00000006606	376	733	584	273	387	225	207975	311378	300415	134338	156393	116253	6.56E-05	-1037300761	down
	APOD	ENSG00000189058	299	205	261	122	72	107	698839	397968	605114	284305	156781	233837	6.55E-05	-1444464494	down
	FRMD8	ENSG00000126391	3888	4000	3846	1755	2168	1857	279024	236549	282191	139642	134074	155061	6.53E-11	-1138759664	down
	SPA17	ENSG00000064199	122	128	157	58	72	48	960944	111691	963541	466228	64242	633796	6.52E-05	-1316398794	down
	ADAM19	ENSG00000135074	8605	6434	6685	2354	2737	3196	298914	186539	217439	820892	74364	103898	6.48E-10	-1513343874	down
	GAS2L1	ENSG00000185340	1999	2305	1611	1091	1021	815	200165	185078	151124	104919	811816	813691	6.48E-07	-1112293119	down
	ARSB	ENSG00000113273	2072	2250	1384	882	1064	873	11334	938718	75823	477304	564502	459671	6.48E-07	-1128480153	down
	POP1	ENSG00000104356	1557	1649	1110	558	684	489	102618	92584	707686	357671	359266	326505	6.46E-11	-143587211	down
	CHST7	ENSG00000147119	1633	1626	1457	704	645	577	166543	133409	14024	749246	536307	574228	6.42E-11	-1395984477	down
	CYB5B	ENSG00000103018	9452	9357	8184	4352	4498	4428	172031	135272	133583	72682	624873	719263	6.39E-09	-1130332711	down
	MMP7	ENSG00000137673	133	310	149	40	49	65	299513	526354	341219	108749	0.977573	136532	6.38E-08	-1999638551	down
	HSPA2	ENSG00000126803	376	404	509	178	278	240	348386	310179	455149	168324	19993	21836	6.38E-05	-1014770631	down
	AC074011.1	ENSG00000230730	149	136	121	55	48	47	368476	293719	388301	111169	0.626561	129499	6.36E-06	-1544075175	down
	MAP3K7CL	ENSG00000156265	542	615	675	244	380	211	134614	117208	153191	532401	701851	52457	6.31E-08	-1268969072	down
	CLDN10	ENSG00000134873	1051	1387	1431	561	478	581	274761	287547	341746	140097	950812	139564	6.30E-09	-1337135064	down
	SOX21-AS1	ENSG00000227640	1137	1085	1452	586	487	645	605898	464833	700226	331265	2138	315647	6.30E-06	-119198012	down
	HADH	ENSG00000138796	5083	4351	3260	2056	2365	2156	573587	422009	371664	268183	23141	234139	6.24E-06	-106999778	down
	CNN2	ENSG00000064666	12421	11019	8821	5933	5824	5325	155153	108152	103582	713884	605226	643335	6.24E-06	-1029472061	down
	AL031587.5	ENSG00000278948	99	80	89	26	42	30	149367	722072	11291	409985	420598	395312	6.15E-05	-1592458473	down
	FBLN1	ENSG00000077942	23416	16636	25723	6847	4091	5848	223.79	128557	231407	63.8	330444	537536	6.13E-12	-2064565223	down
	DPYSL2	ENSG00000092964	4205	4563	4272	1621	1674	1787	229581	202882	209615	817168	744901	887838	6.11E-15	-1459753691	down
	UBB	ENSG00000170315	16749	17009	15399	9441	8452	7888	1641.21	1345.22	1407.27	940584	666957	692.83	6.08E-07	-1031388115	down
	USP5	ENSG00000111667	9148	9834	7293	4618	4822	3849	676812	564585	49809	335732	280524	269927	6.05E-08	-1090432792	down
	INSIG1	ENSG00000186480	6211	4427	5545	2695	2715	2749	603255	382727	517653	246388	248385	254812	6.04E-06	-1111956789	down
	SNX10	ENSG00000086300	416	526	435	188	309	184	808857	780954	595654	288957	443205	310622	6.03E-07	-1142928301	down
	PRDX4	ENSG00000123131	7952	9264	8009	4783	4941	3791	193025	177775	183488	107.6	92251	854327	6.02E-08	-1004563818	down
	PDE1C	ENSG00000154678	38299	27556	21795	12384	8972	10232	172281	103661	952292	513134	389728	449998	6.02E-08	-1578056021	down
	KCNJ16	ENSG00000153822	523	510	387	206	233	284	548658	376462	395413	185567	195805	241771	6.01E-05	-1078903629	down
	SUSD5	ENSG00000173705	2089	2002	1536	842	1133	953	110106	78359	718954	394412	415237	457395	5.99E-07	-106635322	down
	TMSB4XP8	ENSG00000187653	3666	2657	3119	1742	1176	1194	112094	914641	810866	57934	324718	519694	5.99E-06	-1303901278	down
	TSPAN1	ENSG00000117472	176	222	161	77	104	61	479641	509798	363542	235824	289862	129602	5.98E-06	-1324501536	down
	SNED1	ENSG00000162804	211	227	248	76	98	107	115648	149964	125712	0.590673	0.561938	0.550121	5.95E-07	-1398476951	down
	ANXA2P1	ENSG00000213406	445	231	338	94	61	91	117959	514784	887859	253881	11923	237216	5.91E-09	-2160283657	down
	REEP1	ENSG00000068615	940	1064	696	459	573	398	894121	749207	498145	363886	51438	360235	5.87E-06	-1032194652	down
	LAMP2	ENSG00000005893	30443	35089	37367	11863	15620	15884	280584	279087	336177	92288	113442	124.35	5.86E-13	-1356116697	down
	YPEL1	ENSG00000100027	138	163	147	60	90	62	19088	175683	175052	0.837295	0.861346	0.680821	5.85E-05	-1201026966	down
	SLX4	ENSG00000188827	1326	1542	866	494	755	717	503737	465431	328245	204023	227924	265164	5.85E-05	-1036969581	down
	GAPDH	ENSG00000111640	185069	164351	147858	85600	69394	63870	6361.41	4461.44	4652	3032.01	1826.52	1963.04	5.84E-08	-1287215115	down
	SUMF1	ENSG00000144455	1630	1524	1153	683	718	527	181641	135874	118398	727055	663875	582925	5.83E-08	-1277225817	down
	KCNN4	ENSG00000104783	1738	1728	1263	584	642	475	240648	18284	170413	879165	724414	62473	5.82E-13	-1591096493	down
	STARD13-AS	ENSG00000236581	115	209	157	55	84	50	306245	402478	408558	135664	0.75384	225038	5.75E-06	-1452523749	down
	DPP3	ENSG00000254986	2278	2339	1951	1145	1099	1000	281005	234951	227415	140005	119046	107517	5.72E-08	-112104444	down
	RAB9B	ENSG00000123570	937	1045	734	457	460	430	606594	547594	461375	291916	224944	269665	5.68E-07	-1111135521	down
	H3F3AP4	ENSG00000235655	948	570	720	378	346	341	994059	359327	65896	109147	173399	109681	5.67E-05	-1200800855	down
	PLAT	ENSG00000104368	4062	4441	6009	1826	1948	2122	329411	29404	452383	143583	131144	173538	5.65E-10	-1403210129	down
	TKT	ENSG00000163931	76702	72508	90149	41211	36228	33741	930299	698512	1057.11	441819	342762	381393	5.65E-08	-1211481759	down
	VMP1	ENSG00000062716	17539	23165	20699	9405	11008	9495	209564	222577	244.61	111197	115.66	118041	5.64E-13	-1138746114	down
	PMP22	ENSG00000109099	9229	5761	6812	3500	2361	2399	130355	654624	907574	451543	26528	324053	5.64E-07	-1512829592	down
	TSPAN9	ENSG00000011105	10481	6266	5387	2470	1588	1838	706548	395728	339408	149427	100705	120258	5.63E-10	-2019747871	down
	TSKU	ENSG00000182704	3961	3303	4148	1902	1713	1459	345526	237658	339914	159812	118606	128883	5.63E-08	-1284251175	down
	WDTC1	ENSG00000142784	5320	6296	5239	2395	3716	2920	315511	292739	285677	127132	16354	153925	5.62E-09	-1021507999	down
	PXDN	ENSG00000130508	22596	18943	15289	5632	6458	5944	801258	559824	568322	194524	21616	255121	5.59E-16	-1778349543	down
	APP	ENSG00000142192	30860	31659	33901	11323	12975	12584	219584	178449	225.93	737828	697109	817573	5.58E-17	-149758427	down
	PTK7	ENSG00000112655	8278	7562	8115	3757	3374	3617	496338	375754	459352	310119	181941	21419	5.58E-09	-1260180964	down
	VAT1L	ENSG00000171724	2446	2812	1568	451	650	695	155783	140495	969675	298204	359826	441029	5.57E-16	-2032132191	down
	CDH2	ENSG00000170558	16800	16939	15728	7936	10155	8521	993278	804678	895568	417658	435077	433283	5.57E-09	-1014701541	down
	EFR3B	ENSG00000084710	542	880	532	234	326	225	189592	242844	175955	0.821179	0.894086	0.726269	5.52E-10	-141543428	down
	SPC24	ENSG00000161888	1914	1893	957	793	463	450	226124	175381	103375	992164	39778	592476	5.51E-06	-155922365	down
	AC093797.1	ENSG00000233110	231	133	71	32	34	41	218241	137437	0.772585	0.429017	0.377809	0.448834	5.51E-06	-2159387654	down
	QPRT	ENSG00000103485	129	161	410	55	77	88	296123	239136	642086	0.857116	156962	126103	5.51E-05	-1784808721	down
	BGN	ENSG00000182492	240	258	331	64	66	64	261945	225052	339249	0.761685	0.634614	0.875581	5.50E-15	-2204142117	down
	CAPNS1	ENSG00000126247	16404	16347	12250	8251	6400	5475	555149	433892	379251	258571	162685	166599	5.49E-07	-1255834876	down
	HGFAC	ENSG00000109758	254	209	218	115	70	93	373373	214192	253103	129109	0.669813	0.8953	5.49E-05	-1385272667	down
	GPC3	ENSG00000147257	285	239	368	75	69	78	374869	288643	479783	106413	0.753394	0.939423	5.48E-12	-2119301544	down
	TUBA1A	ENSG00000167552	36275	26616	31140	13728	9522	10521	538609	316477	432157	186293	109007	141838	5.48E-09	-1580820384	down
	SH3BGRL	ENSG00000131171	1731	1604	2133	854	701	976	321515	231432	38523	167276	114004	180929	5.48E-06	-1206068473	down
	PTGES3P3	ENSG00000229204	306	399	249	145	193	165	19684	196162	153161	861515	907688	935721	5.47E-05	-1027428427	down
	FOSL1	ENSG00000175592	6305	8643	6268	2913	3782	2897	920202	999049	857273	407788	430921	400805	5.44E-14	-1250091091	down
	AC091057.1	ENSG00000187951	317	807	911	212	176	285	349756	453706	433713	335598	15597	312707	5.43E-06	-1646270257	down
	ADAMTS12	ENSG00000151388	1077	1575	1062	511	838	608	421173	574573	38459	271974	386985	207434	5.41E-07	-1036712557	down
	PBXIP1	ENSG00000163346	3539	4129	5476	2050	2492	2454	265633	244785	368641	14.17	150269	168875	5.41E-06	-1018846012	down
	LINC02582	ENSG00000261780	614	947	400	318	346	251	106708	130264	562286	508057	415075	404899	5.40E-05	-1185181568	down
	COL4A5	ENSG00000188153	9652	6747	8266	2887	3133	3402	453269	290477	375285	186244	124579	18253	5.39E-10	-1514577735	down
	NEURL1B	ENSG00000214357	4584	3665	3185	1043	763	966	190199	123959	125634	449086	27803	399071	5.37E-16	-2142772819	down
	HOMER2	ENSG00000103942	2839	2492	2323	1129	1327	1287	303618	206817	255406	111812	122116	137718	5.34E-08	-1151816815	down
	H2AFV	ENSG00000105968	18445	17933	13083	8843	7865	6852	326477	259316	222596	158284	131372	126645	5.34E-07	-1172663152	down
	SNN	ENSG00000184602	1798	1793	2343	830	1169	1035	134941	107071	160344	633884	690602	745683	5.32E-07	-109322556	down
	ITGB4	ENSG00000132470	8683	4635	7406	3030	2278	2994	436721	196096	390099	317921	149246	16165	5.32E-06	-1439496005	down
	KIAA1147	ENSG00000257093	172	123	108	11	5	28	190705	0.891537	0.839025	0.0326057	0.019197	0.114231	5.28E-10	-328175501	down
	CLU	ENSG00000120885	39546	40950	48587	21563	19864	18178	897.83	717379	1020.89	440269	356	390566	5.27E-09	-121785668	down
	SPAG5	ENSG00000076382	10203	12214	7195	5419	4835	4637	907707	873959	616974	572325	417482	437502	5.27E-06	-1078508794	down
	SRD5A3	ENSG00000128039	448	546	441	252	221	196	984972	989222	915284	619816	447749	3689	5.25E-07	-119296088	down
	MT-ATP6	ENSG00000198899	163051	166441	140472	95607	80973	74353	6927.29	5608.81	5545.43	3718.61	2633.9	2884.75	5.25E-06	-100242342	down
	GALNT5	ENSG00000136542	5507	3662	4550	1767	1431	1739	203789	110605	15901	668055	437628	669547	5.24E-09	-1588322146	down
	TOP2A	ENSG00000131747	47514	48814	31539	16635	13770	16567	165831	136026	101649	553031	364542	523027	5.22E-10	-1532726673	down
	GALNT16	ENSG00000100626	669	653	510	244	263	224	521993	51193	52644	156137	271438	171587	5.22E-10	-1438566711	down
	TRMT2B	ENSG00000188917	2071	2461	1770	797	1089	816	143162	134451	121199	5369	636538	536211	5.20E-13	-1337201103	down
	KIAA0895L	ENSG00000196123	1198	1125	922	664	618	465	126352	899562	980837	587081	472434	399887	5.20E-05	-1004468917	down
	ESRG	ENSG00000265992	325	379	240	99	90	70	196856	199591	139596	0.72909	0.444427	0.451122	5.14E-12	-1963502954	down
	G3BP1	ENSG00000145907	23521	26584	20084	10851	13125	12314	206436	191895	152215	829546	936032	938368	5.13E-09	-1058192812	down
	ECI2	ENSG00000198721	2104	2249	1856	1345	972	910	80579	709555	679608	383234	294644	336981	5.13E-05	-1031034474	down
	S100A6	ENSG00000197956	101268	79242	79256	41967	26394	24723	3878.02	2388.2	2818.07	1478.31	778031	863998	5.11E-08	-1578352149	down
	ANO1	ENSG00000131620	282	311	137	65	91	44	285162	288379	158974	0.504319	0.808488	0.495126	5.11E-08	-1995007758	down
	KANK2	ENSG00000197256	7428	8017	7406	3210	4102	3507	588435	470233	528712	222056	253066	263191	5.09E-13	-119464693	down
	CD276	ENSG00000103855	6248	6656	5549	2698	2906	2377	558772	507568	523869	282859	225732	217326	5.06E-13	-1318490845	down
	BST1	ENSG00000109743	850	838	1005	477	422	320	161624	139292	185159	101229	704053	588469	5.06E-07	-1251877943	down
	RGS8	ENSG00000135824	266	335	144	90	93	90	176571	183649	0.817929	0.441524	0.492228	0.697225	5.05E-06	-1538286739	down
	CD82	ENSG00000085117	4340	5718	4371	1402	1654	1303	771337	938257	841088	240165	237459	251856	5.01E-29	-1829254144	down
	PI15	ENSG00000137558	730	341	662	157	199	221	379869	187407	360294	0.726504	129686	108798	5.01E-07	-1736855054	down
	PIMREG	ENSG00000129195	4498	5077	3167	2099	1746	1424	698448	618261	462833	31303	222932	218403	5.00E-08	-1365014833	down
	CALU	ENSG00000128595	25250	27218	20079	11177	14373	12785	192409	163932	141443	740298	842072	854584	5.00E-08	-1033605732	down
	NMU	ENSG00000109255	853	879	680	448	284	206	283196	216354	202741	132667	63785	674177	5.00E-06	-1449150363	down
	CEBPZOS	ENSG00000218739	1339	1424	1023	642	699	595	30705	256506	244116	15558	137948	133001	4.97E-07	-1075487943	down
	PDPN	ENSG00000162493	4066	4738	4121	1911	1573	1771	532575	567239	540038	22067	167662	221163	4.95E-11	-1383220174	down
	PERP	ENSG00000112378	3009	3466	3010	1346	1910	1523	152627	139078	141959	647105	74859	711019	4.95E-11	-110757979	down
	CCDC80	ENSG00000091986	3114	4013	4078	1576	2070	1792	30196	317494	364667	157529	167047	167845	4.95E-11	-1151789259	down
	PFKFB3	ENSG00000170525	6495	7852	14128	3507	5050	4914	378314	352449	724334	20	221886	260948	4.91E-05	-1198078253	down
	CD44	ENSG00000026508	91588	81658	69823	28922	28590	26693	1055.28	837698	823837	280566	360.03	315705	4.90E-15	-1641302862	down
	EXTL3	ENSG00000012232	11214	13272	10641	4564	6719	5827	402185	400932	363707	162493	189991	19.9	4.88E-11	-1153132656	down
	NDRG2	ENSG00000165795	464	501	627	223	314	278	784755	815278	122016	382297	457888	481817	4.88E-06	-1086842135	down
	ITGB3	ENSG00000259207	348	392	342	61	80	52	539483	475131	473779	108438	0.925812	0.871864	4.87E-26	-2606776405	down
	SCUBE2	ENSG00000175356	869	682	715	244	307	250	708645	524113	675247	402884	388627	291898	4.84E-12	-1634121782	down
	VSNL1	ENSG00000163032	409	368	282	88	122	130	932717	498126	494438	205917	190524	252316	4.84E-10	-1759977902	down
	FAM72A	ENSG00000196550	473	623	362	275	255	165	886909	107735	602458	562786	476713	415777	4.84E-05	-1161649439	down
	SELENON	ENSG00000162430	8468	8814	8034	3363	3686	3442	640092	530609	569176	27185	224781	240854	4.81E-15	-1379312632	down
	CENPI	ENSG00000102384	2724	3089	1526	937	1001	972	239103	211037	127435	793525	764245	895435	4.79E-08	-14314535	down
	FOXN3	ENSG00000053254	7334	7163	7408	3156	4233	4064	425431	340809	400887	143847	221392	221593	4.79E-08	-1055919941	down
	PLAU	ENSG00000122861	2025	2674	2559	1133	1315	1077	302913	306838	35236	152052	149761	150935	4.78E-11	-114507694	down
	ATP2B4	ENSG00000058668	8889	12926	10484	3517	6498	5240	254363	297405	257614	121563	154818	130823	4.77E-09	-1198810113	down
	G6PD	ENSG00000160211	12839	14257	13716	6902	6222	5490	167312	147827	165871	751869	671595	697457	4.76E-10	-1230276689	down
	SLC6A6	ENSG00000131389	4155	4626	6717	2116	3345	2962	185019	173807	257828	854892	140999	130976	4.76E-05	-1005949752	down
	DLGAP5	ENSG00000126787	5197	5637	3869	2109	1693	1844	381448	320895	264149	141254	929328	117636	4.72E-10	-1467160971	down
	FAM69A	ENSG00000154511	767	780	849	379	426	425	801791	593289	773231	348814	348496	369325	4.70E-07	-1072419718	down
	MAP3K6	ENSG00000142733	1689	1573	1397	842	790	820	11519	109404	108674	942092	540954	763908	4.69E-06	-1031013584	down
	PCDHGB2	ENSG00000253910	70	82	94	10	17	11	0.765414	0.774967	0.970413	0.115834	0.173085	0.12999	4.66E-10	-2819858987	down
	TTF2	ENSG00000116830	5199	5975	3801	2554	2844	2302	455276	477211	329875	255776	256168	216366	4.64E-07	-1064301593	down
	AL590560.1	ENSG00000272668	149	225	163	59	101	88	0.573788	0.714142	0.589996	0.233541	0.322128	0.352031	4.63E-05	-1220875098	down
	SOGA1	ENSG00000149639	19900	18842	17052	5621	9479	8753	308122	234871	249213	867094	129711	130265	4.62E-10	-1357673302	down
	PSD3	ENSG00000156011	5081	6499	9853	1656	3155	3741	133435	159737	237719	430407	807637	101898	4.59E-06	-1441368867	down
	CNN3	ENSG00000117519	48828	41229	42551	24838	22698	22582	627636	430505	529617	290776	232793	273625	4.57E-06	-1029791013	down
	BUB1B	ENSG00000156970	5036	5476	3237	1934	1908	1808	470095	422829	303665	222882	145863	167047	4.56E-09	-1380724517	down
	ANXA2	ENSG00000182718	142956	129529	110089	64782	47221	41739	2164.08	1548.01	1547.56	901368	557395	593723	4.54E-08	-1412512381	down
	ASAH1	ENSG00000104763	8410	7113	6943	4032	3113	3703	978778	652386	815933	468407	324102	427533	4.52E-06	-1148995494	down
	TMSB10	ENSG00000034510	63840	60260	47484	36428	29437	24407	3977.95	2881.24	2726.61	2034.71	1362.98	1338.98	4.51E-05	-1027601743	down
	SOX3	ENSG00000134595	5373	8029	6273	3400	3196	2887	589561	687957	636483	348391	273038	29406	4.49E-09	-1134634332	down
	FIBCD1	ENSG00000130720	104	121	70	19	50	29	147035	141942	110641	0.641223	0.50335	0.421798	4.49E-05	-1730906923	down
	LYPD6	ENSG00000187123	1783	1275	819	622	594	526	114205	650953	527581	405766	31423	337956	4.46E-05	-1278647918	down
	AC009299.2	ENSG00000232320	448	530	418	225	205	148	197382	189481	185841	923354	755099	612138	4.45E-08	-1371209259	down
	GPC4	ENSG00000076716	34685	24038	20369	15190	9610	9825	144696	799435	800304	59285	309843	382811	4.44E-05	-1295294105	down
	SSBP4	ENSG00000130511	1417	1742	1544	758	778	731	426214	363306	427755	241802	158489	202101	4.43E-10	-1149691893	down
	FREM2	ENSG00000150893	2547	2313	1243	499	1030	1081	400244	294654	183383	0.901596	123513	213114	4.43E-05	-1358762371	down
	CARHSP1	ENSG00000153048	3273	3160	3315	1798	1564	1510	920484	75385	837128	515899	37834	40097	4.40E-07	-1102652879	down
	LZTS1	ENSG00000061337	10611	7748	9490	3002	3274	3770	414228	241255	342104	119001	102354	140022	4.37E-11	-1593381294	down
	HMGA1	ENSG00000137309	23301	35610	17100	11245	14263	9002	263516	319728	179889	119594	123181	920418	4.34E-07	-1237387205	down
	MYEOV	ENSG00000172927	311	298	109	102	69	46	137655	104871	382946	465871	190081	15521	4.34E-05	-1819912816	down
	UGT8	ENSG00000174607	1647	1518	1185	535	505	551	126401	807022	779635	328596	348538	425855	4.33E-11	-1555317278	down
	SYNC	ENSG00000162520	962	931	1053	405	443	384	189835	143145	182734	803813	731595	67062	4.33E-11	-1373574217	down
	BVES	ENSG00000112276	4986	4356	5060	2220	2486	2406	219361	161707	205678	852122	107819	115571	4.31E-08	-1136925841	down
	PDLIM7	ENSG00000196923	5517	5686	5624	3070	3261	2543	807995	641594	773363	417318	356225	346531	4.31E-08	-1035975448	down
	UBBP4	ENSG00000263563	69	43	56	10	21	9	0.73205	0.661726	0.208959	0.25691	0.300843	0.153231	4.25E-05	-2242037626	down
	ITGA2	ENSG00000164171	3578	4529	4048	884	1892	1676	114063	121339	125767	261145	518518	54876	4.24E-11	-157512536	down
	SCNN1A	ENSG00000111319	367	235	383	172	97	94	566702	286336	450079	168778	132828	136246	4.21E-05	-1545405896	down
	AC004656.1	ENSG00000260822	1675	1294	1259	619	429	513	804988	509129	579385	297104	162284	24191	4.18E-08	-1537278453	down
	MEST	ENSG00000106484	4031	2644	2841	1581	800	1081	693155	412096	462024	199297	125048	172388	4.18E-06	-1551524227	down
	PCDHGC5	ENSG00000240764	97	180	146	24	66	47	101338	144854	132682	0.22361	0.541003	0.487716	4.17E-06	-1744730638	down
	DDX11L2	ENSG00000236397	303	322	223	96	158	97	342535	288813	238621	134922	115349	0.902602	4.16E-07	-1405512641	down
	GPI	ENSG00000105220	11266	10856	8771	5597	5344	4733	138654	111907	100377	66065	548845	561757	4.16E-07	-1085787982	down
	ALDH6A1	ENSG00000119711	1555	1489	1349	670	869	800	132872	102069	110071	561694	57481	599105	4.15E-07	-1029729104	down
	TMEM117	ENSG00000139173	955	978	675	437	482	423	939651	836982	781945	405743	525915	382933	4.15E-06	-1068168596	down
	ITGA7	ENSG00000135424	18367	16552	13630	5826	7003	6205	118179	890778	797172	426132	384419	392607	4.14E-13	-1472377511	down
	COL27A1	ENSG00000196739	1070	1691	973	371	740	564	425711	530191	343748	146876	230674	199904	4.13E-07	-1268779095	down
	DCBLD2	ENSG00000057019	66829	73334	54358	20045	26695	24705	334136	314975	260289	795771	119931	115865	4.11E-17	-155760786	down
	KLHDC8A	ENSG00000162873	10713	12967	9977	4224	4278	4556	855159	826113	748381	308309	26752	332069	4.10E-15	-1457634953	down
	FLG-AS1	ENSG00000237975	291	343	417	57	54	33	395282	400663	518088	0.978822	0.548564	0.446202	4.05E-24	-2977687942	down
	VMAC	ENSG00000187650	465	372	500	129	191	175	542937	377866	534722	164961	188465	211143	4.02E-09	-1569359564	down
	MAP1A	ENSG00000166963	12903	16988	19427	5789	9814	8842	281665	292829	389142	122648	167106	181367	4.01E-07	-1130900859	down
	PLS3	ENSG00000102024	20640	26817	20132	9046	13435	10945	153593	166.38	137713	624523	735662	785727	3.97E-11	-1128017789	down
	SH3TC2	ENSG00000169247	221	202	135	48	61	50	134026	0.98998	110648	0.31747	0.660341	0.408055	3.97E-09	-1934481629	down
	MIR222HG	ENSG00000270069	1297	1481	1072	560	342	491	193837	176365	150202	793943	425979	704962	3.95E-08	-1534676145	down
	MT-ATP8	ENSG00000228253	16879	19499	17293	9818	8656	8499	10480.6	8191.86	9439.47	5007.46	4018.39	4532.09	3.94E-08	-1083931786	down
	SERPINE1	ENSG00000106366	34621	33654	37161	10596	12556	12214	231453	177803	228.57	665959	651553	751308	3.93E-20	-1691428562	down
	MICALL1	ENSG00000100139	8620	6520	6715	3602	3733	3195	553569	350209	376113	228808	211453	213268	3.89E-07	-1179700373	down
	LINC00052	ENSG00000259527	458	508	363	182	67	119	562084	497712	417925	2085	0.752854	144833	3.89E-07	-1903108385	down
	BTD	ENSG00000169814	384	371	378	180	176	218	615832	421644	507092	282473	253641	299221	3.89E-05	-1083151073	down
	P2RX6	ENSG00000099957	341	365	388	136	210	132	489178	370408	471701	157335	205033	167433	3.88E-08	-1327145036	down
	TMEM44	ENSG00000145014	1273	1221	1202	584	684	610	186756	147245	158163	889212	831994	836511	3.87E-08	-1094244362	down
	PPM1F	ENSG00000100034	2784	2667	2297	1257	1558	1381	156328	136343	126961	726963	820786	799245	3.87E-07	-1004271901	down
	CA12	ENSG00000074410	2312	2538	1859	332	656	559	142708	12522	108902	172363	326286	307348	3.86E-22	-2246790774	down
	GALNT2	ENSG00000143641	4192	4284	4058	1195	1637	1446	288347	282106	282348	964411	952761	101675	3.85E-21	-1671788622	down
	RAB11FIP1P1	ENSG00000228492	160	178	178	60	77	80	595022	53338	634632	207827	258955	339433	3.84E-06	-1359550014	down
	DUBR	ENSG00000243701	997	1021	1243	636	513	563	914412	855665	124605	624783	543467	736463	3.84E-05	-1024077491	down
	TKFC	ENSG00000149476	597	558	565	325	229	279	142103	110211	128031	708285	472246	708295	3.84E-05	-1136878391	down
	AC092902.2	ENSG00000241288	190	286	203	82	120	83	369766	409215	354382	257631	134467	190175	3.83E-07	-1359678558	down
	MGST1	ENSG00000008394	300	586	469	133	284	174	102695	160409	133239	487817	677158	532668	3.82E-06	-1314105542	down
	SEMA3B	ENSG00000012171	3063	2122	3376	1465	1016	1072	320317	175731	329594	146097	951385	109564	3.82E-06	-1376429326	down
	MBOAT1	ENSG00000172197	342	341	288	160	179	174	427362	355831	339373	180584	184358	195467	3.82E-05	-1030998897	down
	PRKAR2A	ENSG00000114302	6339	6806	5544	2738	4084	3275	283713	256789	260268	10335	168739	13905	3.81E-08	-1012326333	down
	SURF4	ENSG00000148248	31636	37465	28322	15111	18771	14724	234674	226046	198168	101.86	112911	105954	3.80E-11	-1113622665	down
	SH3BGRL3	ENSG00000142669	5324	7028	4861	2856	3738	2509	124853	139.06	112803	70.56	74479	587507	3.80E-08	-1029691757	down
	CIT	ENSG00000122966	6797	8033	5296	2850	3298	3051	25882	253719	194797	106178	105244	117293	3.78E-10	-1230859972	down
	EBF4	ENSG00000088881	2291	1795	2726	1241	1127	1133	235241	151481	259502	135839	108335	130256	3.76E-05	-1075385265	down
	KIF20A	ENSG00000112984	9668	10266	7184	2620	1786	1717	720272	61736	508421	218552	129059	140977	3.74E-18	-2229366597	down
	TMEM109	ENSG00000110108	3372	3046	2537	1828	1491	1403	386191	263805	266715	243469	138362	144307	3.73E-05	-1025262006	down
	FAM129B	ENSG00000136830	25438	24900	18668	11405	12561	9575	142543	110479	998492	611762	559838	517141	3.68E-08	-115710174	down
	TRIOBP	ENSG00000100106	5082	4827	3865	2877	2422	2083	435065	337669	281113	219524	164247	16734	3.68E-05	-1002090728	down
	LNCAROD	ENSG00000231131	6366	8399	6189	2056	2626	2646	968789	100668	860757	285329	288729	352666	3.67E-19	-1613582335	down
	TUBA1C	ENSG00000167553	19059	21541	15103	8670	9681	7522	793906	713036	598389	324176	308598	286299	3.67E-10	-1213937983	down
	FAM102B	ENSG00000162636	1472	1748	1514	553	712	924	635495	599746	624027	231034	285047	370953	3.67E-07	-1210101582	down
	LBH	ENSG00000213626	5634	3048	5913	2270	1534	1677	546933	249087	569726	169598	121689	156731	3.66E-06	-1530127294	down
	TUBAP2	ENSG00000214391	259	304	229	132	125	103	378946	338065	308749	181738	13609	135137	3.65E-06	-123640827	down
	ACTBP11	ENSG00000188460	144	99	91	24	27	41	3.3	179882	200148	0.603534	0.572461	0.998727	3.65E-06	-1981409308	down
	LINC01173	ENSG00000280744	367	266	177	118	89	101	287625	141911	130782	961039	415873	53192	3.63E-05	-1504180594	down
	NID1	ENSG00000116962	6681	6010	5570	2095	2776	2494	242811	176971	19138	782957	781957	886108	3.62E-13	-1435907022	down
	SCARB1	ENSG00000073060	4456	4114	4044	1969	2020	1716	386479	29685	358888	228283	143406	148273	3.60E-10	-125958434	down
	LAMA4	ENSG00000112769	446	749	447	199	400	219	420575	38208	403595	183161	234724	193229	3.56E-05	-1126430803	down
	PWAR6	ENSG00000257151	163	203	133	82	55	59	0.983459	0.98189	0.756433	0.46983	0.282285	0.404647	3.56E-05	-1425288875	down
	NT5DC3	ENSG00000111696	4792	4459	4039	1999	1894	1849	163905	135102	130371	647581	576235	656904	3.55E-10	-1317572567	down
	NEDD9	ENSG00000111859	8779	8801	13105	5228	5514	5782	475125	374876	698101	256428	243482	281199	3.53E-05	-1001892703	down
	ECE1	ENSG00000117298	17886	15734	16727	7250	7550	6930	757985	53627	667164	297124	255524	280011	3.52E-11	-1328682169	down
	SV2A	ENSG00000159164	4810	4738	5253	2446	2539	2963	24034	191947	242464	117564	995487	139265	3.52E-06	-1001104483	down
	SEZ6L2	ENSG00000174938	734	1047	940	297	618	380	499044	55248	578286	200785	442406	250173	3.50E-07	-1203843188	down
	FAT3	ENSG00000165323	2307	2642	1845	882	1175	1276	894181	819117	556372	307421	363169	350502	3.49E-07	-1131855511	down
	CD46	ENSG00000117335	8575	8676	8321	4402	4595	4454	729333	589879	709297	304675	326585	345945	3.48E-08	-103391116	down
	GOLM1	ENSG00000135052	9338	9438	8310	5059	4926	4507	651608	541714	549645	338086	281148	299002	3.45E-07	-1007148901	down
	PFN2	ENSG00000070087	18143	15494	16000	8867	5729	7445	335567	226413	276876	141152	796617	121454	3.43E-06	-1260058848	down
	TNFAIP8L1	ENSG00000185361	596	690	568	180	254	245	497059	452136	446193	173284	171421	214935	3.41E-13	-1560504393	down
	ACLY	ENSG00000131473	20280	21310	15378	9109	10851	9211	104496	882125	748502	455001	441522	440122	3.41E-08	-1078294622	down
	ERMP1	ENSG00000099219	1057	1401	1159	387	653	496	484934	52664	501003	199427	237232	242186	3.39E-12	-1354821409	down
	IGSF8	ENSG00000162729	3066	2770	2614	1206	1070	1014	29854	224282	247258	11.6	820334	962735	3.39E-11	-1467401148	down
	FDFT1	ENSG00000079459	28114	24574	17883	11877	8007	7490	400884	276.54	242171	154356	977559	104422	3.39E-07	-1460176245	down
	PIK3CD	ENSG00000171608	4962	5780	4874	2405	2917	2362	235526	229422	223948	111927	117678	102714	3.37E-12	-1133463513	down
	IGFBP5	ENSG00000115461	242	332	245	80	81	76	106459	125988	111334	0.358669	0.346174	0.361166	3.35E-13	-1881186106	down
	APOBEC3C	ENSG00000244509	2197	2662	2453	1204	1296	1166	244117	226882	227777	112936	116377	122555	3.33E-10	-1097066185	down
	GPR161	ENSG00000143147	3930	3479	3204	1730	1963	2032	157934	116504	114005	5819	687096	708412	3.33E-06	-1006355461	down
	MSMO1	ENSG00000052802	8907	7344	5207	3295	3025	2919	100856	656639	544827	369543	27808	31423	3.31E-07	-1327451866	down
	FSTL1	ENSG00000163430	22227	18069	19347	8734	6645	7743	152844	106409	120899	428157	41879	49414	3.30E-09	-1467966689	down
	SPP1	ENSG00000118785	30339	19068	16481	8335	5937	5956	529093	266043	268671	138981	810443	966238	3.28E-09	-1819148922	down
	CDH13	ENSG00000140945	537	826	499	258	244	148	653484	891561	594942	2447	329042	173226	3.28E-09	-1605306711	down
	EZR	ENSG00000092820	40341	34559	27695	18469	18475	15613	277185	191467	179239	119706	100587	100276	3.26E-06	-1082094881	down
	CAPN2	ENSG00000162909	16707	17378	14523	7994	9824	7686	116935	969474	951366	506352	538718	501315	3.25E-09	-1048577278	down
	AL080243.2	ENSG00000237214	1749	1766	1212	896	991	648	878111	689789	563095	414964	385181	294363	3.25E-05	-1016869712	down
	RDH5	ENSG00000135437	357	251	188	72	110	108	31419	175438	151191	988548	87135	978642	3.24E-06	-1597363722	down
	EHBP1L1	ENSG00000173442	4168	4698	4988	1927	2547	2469	23137	189287	251126	13564	110127	145703	3.23E-09	-1109052679	down
	TUBBP1	ENSG00000127589	14207	13359	10354	5786	5481	5286	214.99	158268	145656	822549	650904	732051	3.23E-09	-1301489192	down
	RGS12	ENSG00000159788	6128	5796	5731	3030	2973	3139	660961	483098	626354	343518	20.88	344966	3.23E-07	-1055387374	down
	H2AFVP1	ENSG00000258741	370	338	249	155	166	145	328614	236541	222474	143408	11783	136255	3.23E-05	-115363159	down
	HSP90AA2P	ENSG00000224411	2291	3233	2038	1137	1540	1184	189759	212044	162881	9894	102651	921589	3.22E-08	-1073244253	down
	LDHA	ENSG00000134333	35828	36328	37556	15582	14383	15123	611655	478496	596974	217268	181258	215556	3.21E-12	-1382720905	down
	LINC00475	ENSG00000225511	369	422	581	172	220	165	642944	689733	113186	338529	329215	2744	3.21E-08	-1420697024	down
	DEPDC1B	ENSG00000035499	1411	1565	993	637	529	569	146511	133373	966021	669596	462177	617663	3.21E-07	-1280776424	down
	MICA	ENSG00000204520	188	183	246	88	102	95	347372	26122	440425	137852	136289	144619	3.20E-05	-1231417112	down
	SOD3	ENSG00000109610	9210	14322	10568	2915	4115	3291	130408	159751	139104	399463	446572	444892	3.19E-27	-1825112204	down
	VCP	ENSG00000165280	54582	54805	46136	26247	25435	21991	338.3	277214	267889	166109	120.89	130266	3.19E-09	-1183964101	down
	VANGL1	ENSG00000173218	942	941	901	419	464	508	473213	367679	39067	167181	202796	231451	3.17E-07	-1108312754	down
	LRP1	ENSG00000123384	2009	2414	4609	692	1188	1608	36977	363452	73669	202234	18693	254719	3.17E-05	-14850781	down
	KIAA0930	ENSG00000100364	3809	4489	4839	1942	2144	1824	287302	26398	328267	140966	121417	129069	3.16E-12	-1258895755	down
	TGFB1	ENSG00000105329	2965	3564	3527	1659	1854	1573	267934	248934	322927	16438	134337	158323	3.16E-10	-1088763206	down
	ADORA2B	ENSG00000170425	3337	3224	4233	1552	1433	1386	447447	34223	518711	202252	150113	174045	3.15E-10	-141037441	down
	RNF145	ENSG00000145860	8089	9073	6555	3986	4706	3776	64173	613854	504113	33269	291012	258774	3.15E-08	-1037806606	down
	GDF11	ENSG00000135414	1296	1394	1266	667	806	647	885989	703551	800366	366713	345586	316981	3.15E-08	-1015176599	down
	CCNB1	ENSG00000134057	15755	17426	12452	7741	5625	5291	259.85	236252	196263	123729	762265	83876	3.14E-08	-1373857205	down
	XDH	ENSG00000158125	88	133	124	51	46	29	0.381131	0.578855	0.439633	0.21047	0.140025	0.104115	3.14E-05	-154673837	down
	SPEG	ENSG00000072195	1846	2053	2169	828	1001	903	183957	158733	180909	96291	855774	80083	3.13E-12	-126283956	down
	PPIA	ENSG00000196262	103212	83905	74774	52553	43131	39870	3860.9	2397.53	2558.29	1719.14	1144.26	1258.06	3.13E-05	-1058841773	down
	CTNNBIP1	ENSG00000178585	5761	4201	3582	2156	1390	1408	801112	517793	490034	311178	206173	198388	3.12E-07	-155282836	down
	C1GALT1C1	ENSG00000171155	1510	1381	1594	876	626	739	226785	164433	221343	125509	74969	103662	3.12E-05	-1093600815	down
	TCN2	ENSG00000185339	2607	2886	3493	1174	1069	1217	28876	25573	365144	135323	932655	129617	3.11E-11	-1471566993	down
	RPSAP12	ENSG00000240087	305	328	254	146	142	123	89051	739041	668417	40077	309364	334722	3.11E-06	-1213286142	down
	PXMP4	ENSG00000101417	1347	1505	1170	685	618	576	129961	125694	109701	565125	538972	590308	3.10E-08	-1193060016	down
	PRSS23	ENSG00000150687	9994	7866	11140	5745	4530	4248	105352	692276	111577	547446	406602	405888	3.10E-05	-1107173028	down
	LMBR1	ENSG00000105983	2509	2435	2427	1070	1479	1297	221066	163717	198503	952648	131383	110521	3.09E-08	-1063028836	down
	MT-CO3	ENSG00000198938	296761	280773	270902	158222	153753	135538	9970.76	7362.12	8439.41	4869.77	3945.48	4125.69	3.09E-07	-103267963	down
	IGFBP4	ENSG00000141753	4043	3762	3651	2216	1760	1748	431607	317606	365183	22565	151453	176416	3.09E-06	-1099657655	down
	PGM1	ENSG00000079739	4776	4665	3933	2609	2195	2031	499551	39349	389972	252606	18661	200486	3.09E-06	-1067791187	down
	CPQ	ENSG00000104324	968	842	1117	518	427	421	151373	116658	149075	72879	500872	58359	3.09E-06	-1205575148	down
	EHMT1	ENSG00000181090	4913	5562	4382	2383	2977	2517	437837	380926	377388	203385	237322	22317	3.08E-09	-1026799368	down
	ITGB5	ENSG00000082781	6973	6150	5861	2975	3859	2761	842024	591987	696903	300848	35969	294841	3.07E-08	-1117582703	down
	COL5A2	ENSG00000204262	17971	14546	15479	3939	4307	5259	567348	367355	458881	123394	112836	165817	3.06E-17	-1944349436	down
	AL928654.1	ENSG00000251602	294	315	222	93	170	137	287197	293836	235731	0.963648	135761	140485	3.06E-05	-1183324342	down
	NCS1	ENSG00000107130	5060	5991	4476	2331	2890	2323	357455	374267	281506	158998	182847	149494	3.05E-11	-1150962431	down
	METTL7A	ENSG00000185432	2691	1569	2341	848	526	701	322996	148755	235689	865397	530449	857428	3.01E-08	-1777210033	down
	LAPTM5	ENSG00000162511	139	162	150	43	82	70	182712	160864	163738	0.417057	0.658954	0.743189	3.00E-05	-1333922517	down
	SLC4A8	ENSG00000050438	1271	1497	875	532	776	543	46243	517306	408368	219089	274272	258293	2.99E-06	-1095983248	down
	CADM1	ENSG00000182985	18530	13178	11813	8197	6988	6179	160598	106258	109043	555662	615898	533573	2.99E-05	-1145925714	down
	ABHD2	ENSG00000140526	7010	8451	6528	2402	4871	3710	293808	325338	308622	743817	238853	154408	2.97E-07	-113325416	down
	PAICS	ENSG00000128050	20536	19200	12623	9645	9735	8486	165.91	127829	988612	700399	720496	659448	2.97E-05	-1020605104	down
	SUCLG2	ENSG00000172340	3657	2985	3052	1916	1494	1566	388835	233759	286663	174363	11489	138958	2.96E-05	-1066147058	down
	HYAL2	ENSG00000068001	2416	2190	2003	1079	842	861	442161	311567	345659	179302	139378	14881	2.92E-08	-1346985163	down
	CAV1	ENSG00000105974	19686	19298	13372	10263	8721	8553	232941	191203	148901	109485	903712	93172	2.92E-05	-1024056388	down
	EMID1	ENSG00000186998	66	41	88	13	17	17	0.818999	0.479503	131417	0.173539	0.304395	0.312126	2.92E-05	-2192178167	down
	COL21A1	ENSG00000124749	1831	1993	2908	684	854	1072	104171	918344	156025	62987	371682	584328	2.90E-08	-1473363795	down
	AC026356.1	ENSG00000274964	105	112	106	43	49	36	209077	161915	161273	0.908718	0.732273	0.676122	2.90E-05	-1450641138	down
	NDRG3	ENSG00000101079	3329	3872	4825	1522	2019	1805	250343	232345	324981	111763	119125	12.32	2.89E-10	-1284866647	down
	MYH9	ENSG00000100345	97689	95542	78187	35166	41613	36990	256882	199586	193672	896222	840326	910834	2.88E-13	-1370379222	down
	ALDH3A2	ENSG00000072210	6533	5013	8382	2743	2439	2595	592218	354312	642353	206303	211296	204602	2.88E-08	-1471405355	down
	MYL6	ENSG00000092841	33535	26247	23790	15458	11299	9861	1982.98	1294.06	1375.05	834.34	527.89	541.52	2.87E-06	-1296809897	down
	TBCD	ENSG00000141556	4634	4657	3592	1775	2135	2251	506591	339011	375516	188896	134784	188351	2.86E-08	-1173819394	down
	SLC9A3-AS1	ENSG00000225138	995	1295	1122	516	712	451	289759	268555	321355	133963	137366	113465	2.85E-09	-1140629819	down
	PLBD1	ENSG00000121316	975	898	917	506	398	427	130437	106293	119877	464704	375526	451434	2.85E-06	-1166036819	down
	SLC6A2	ENSG00000103546	37	68	68	4	14	12	0.463194	0.918402	0.766985	0.072484	0.160925	0.196832	2.85E-06	-2641981061	down
	LINC00707	ENSG00000238266	7282	6262	3614	2803	1717	1811	891371	622237	44271	31385	198028	225572	2.84E-06	-152609583	down
	AL161431.1	ENSG00000275216	16568	17852	19192	9897	6967	6903	679218	592057	721243	388976	220956	26.46	2.83E-07	-1259310675	down
	MMP15	ENSG00000102996	582	441	412	192	245	134	350515	223851	231086	111909	115204	0.769604	2.83E-07	-1475676245	down
	BACE2	ENSG00000182240	2312	2290	2257	812	692	855	280632	22497	259174	905253	756237	957787	2.81E-13	-1634003691	down
	LTBP4	ENSG00000090006	2180	2130	2672	966	1237	1373	224432	177527	233697	911836	116979	141246	2.81E-06	-1080304623	down
	ACTBP2	ENSG00000213763	281	223	188	118	64	62	617942	371295	381067	242168	111474	124231	2.81E-05	-1597279368	down
	POSTN	ENSG00000133110	379	154	241	17	19	27	288528	100169	178608	0.233908	0.138283	0.237515	2.80E-18	-3770875718	down
	RNF215	ENSG00000099999	966	1128	1013	567	476	545	140461	119812	13.62	79402	579742	674776	2.80E-06	-1054793303	down
	DUSP6	ENSG00000139318	3343	3298	2718	1305	1503	1755	57771	43107	452895	190104	195009	274789	2.79E-07	-114259677	down
	SEMA3C	ENSG00000075223	2696	2692	4369	1450	1756	1782	272596	226715	386815	126054	135604	16336	2.79E-05	-1084490764	down
	GTSE1	ENSG00000075218	5331	5870	3810	2090	2029	2013	464977	392899	314102	198263	137545	165203	2.76E-10	-1387329782	down
	PKM	ENSG00000067225	137039	158525	131800	73281	79280	64662	1260.01	1155.1	1130.1	620372	557181	549461	2.75E-10	-1081229529	down
	SDC3	ENSG00000162512	4881	5436	5620	1920	2860	2811	282653	246697	276832	782717	127611	144987	2.74E-09	-1186974658	down
	DARS2	ENSG00000117593	3455	3453	2537	1467	1704	1434	254917	205551	172647	104106	957439	100528	2.74E-08	-1151151236	down
	ANXA6	ENSG00000197043	4231	3746	5033	1838	1626	1811	358296	261594	403743	157613	115784	149076	2.73E-09	-1407522855	down
	HAS3	ENSG00000103044	8803	4734	5889	1385	1244	1317	532531	252765	34.58	795549	698782	879902	2.71E-17	-2432703283	down
	APLP2	ENSG00000084234	57822	52979	48670	17458	17921	15860	400.11	296715	321532	112179	101608	105227	2.67E-19	-1751830868	down
	SLC19A1	ENSG00000173638	1297	1379	1022	572	462	519	88877	837849	85355	679509	325949	342833	2.67E-08	-134027099	down
	RCAN3	ENSG00000117602	1323	1234	1219	555	606	581	112404	829659	106446	426439	492631	39979	2.66E-09	-1230207066	down
	UBASH3B	ENSG00000154127	3146	3227	2021	720	878	867	160109	141804	107621	252134	48054	484294	2.65E-16	-1877585707	down
	ALDH1A1	ENSG00000165092	1629	1345	592	301	306	288	172524	116654	653479	320972	295746	322288	2.65E-10	-2110582313	down
	FADS2	ENSG00000134824	19470	13570	14736	6611	3732	5249	200614	119397	148.16	584356	359629	564342	2.64E-08	-1708592812	down
	HSPG2	ENSG00000142798	3524	3166	3154	868	1909	1748	951629	646964	673627	709157	409446	545632	2.64E-06	-1265856668	down
	VOPP1	ENSG00000154978	16963	12693	10735	5822	5819	5185	129097	765018	762669	419053	40057	387999	2.63E-08	-1387211366	down
	TTLL1	ENSG00000100271	140	179	160	57	46	69	278666	260913	287086	0.988624	0.647822	11005	2.63E-06	-1558350266	down
	NFYA	ENSG00000001167	2501	2903	2112	797	1306	931	201314	189378	16167	569522	922293	750771	2.62E-13	-1435224651	down
	NRBP2	ENSG00000185189	4125	3657	4633	1959	1725	2029	38114	278667	39015	17214	130362	161665	2.62E-07	-1223013137	down
	RAB31	ENSG00000168461	4691	3584	3877	1735	1504	1573	283841	185268	217495	105064	120703	104182	2.61E-09	-1449173636	down
	SCARA3	ENSG00000168077	5880	6312	5570	1867	1863	1840	402308	337526	35718	124462	105592	12032	2.59E-22	-1774019166	down
	PYGB	ENSG00000100994	112530	88479	78436	40311	31298	32449	602892	369125	394376	202833	128321	157272	2.59E-09	-1530794506	down
	COCH	ENSG00000100473	243	221	231	111	133	97	679936	519308	592324	338521	260239	317368	2.59E-05	-1152971262	down
	ITGA6	ENSG00000091409	6967	7665	5139	1966	2574	2023	346676	312068	257875	994473	118231	106548	2.58E-18	-1707026809	down
	CDH11	ENSG00000140937	556	776	661	250	364	288	937605	908615	809894	223112	414257	527066	2.58E-10	-1253375332	down
	COL4A2	ENSG00000134871	17196	13410	12199	4033	3867	3973	701348	440103	466252	227047	139279	155077	2.57E-17	-196615931	down
	S100B	ENSG00000160307	130	112	89	35	39	32	395622	29915	287654	108517	102681	120265	2.57E-06	-1764927188	down
	MELTF	ENSG00000163975	1006	1014	1696	391	513	463	914697	82103	147013	381862	40047	453936	2.56E-09	-156601543	down
	ATP1B3	ENSG00000069849	17507	15730	13423	8290	7742	6591	266605	194006	191332	131307	933957	925633	2.56E-07	-1155418979	down
	ZFP36L1	ENSG00000185650	19192	21024	28304	10687	13702	12461	162.52	138.76	229211	688044	894891	91.42	2.56E-06	-1011595708	down
	MDM2	ENSG00000135679	9709	10508	15192	4308	5066	6666	835348	863314	131904	410222	47.73	733442	2.56E-06	-1245096651	down
	RIPPLY3	ENSG00000183145	118	158	116	40	60	48	160468	177411	149132	0.589114	0.579022	0.670005	2.56E-06	-1515051577	down
	RTL8C	ENSG00000134590	10409	8213	8274	5370	3592	3767	206513	128743	154032	105093	55.79	717922	2.56E-05	-1177821602	down
	HTRA1	ENSG00000166033	2707	2433	2621	566	530	581	403371	299099	381939	959701	745224	869606	2.55E-27	-2317281432	down
	B4GALNT1	ENSG00000135454	4050	4314	3716	1750	2429	1928	439258	386617	378885	204406	234354	213462	2.55E-10	-1106096441	down
	ANKRD34B	ENSG00000189127	316	297	229	61	104	114	223598	16185	118356	0.379901	0.644532	0.782955	2.54E-08	-1717198862	down
	PRR11	ENSG00000068489	4231	5241	2992	1016	1112	1185	540101	52891	342859	121805	115198	133766	2.53E-19	-2002589968	down
	COL4A1	ENSG00000187498	9030	6271	5759	1705	2339	2315	272547	173165	168368	745324	62774	755182	2.53E-13	-1866606006	down
	PHTF2	ENSG00000006576	2748	2482	2318	1150	1492	1462	202479	154812	166785	733162	100043	107881	2.53E-06	-1000996676	down
	DGKG	ENSG00000058866	1462	1867	1756	860	902	880	134149	126154	13525	52031	700993	745584	2.52E-08	-104011222	down
	PQLC3	ENSG00000162976	367	286	424	129	155	115	589614	395952	745318	214081	221605	165727	2.51E-08	-1567485783	down
	AC012512.1	ENSG00000226539	605	825	486	295	337	252	157364	173082	122344	774677	693163	528303	2.51E-07	-1213902136	down
	MXRA7	ENSG00000182534	20187	17417	18591	9075	8418	6998	234086	177388	189508	105341	869353	858771	2.50E-09	-1312619598	down
	IGFBP7	ENSG00000163453	23136	20847	23737	10422	7425	8165	505686	363085	481.67	202797	121702	157.8	2.50E-09	-1474247476	down
	PCDHGA9	ENSG00000261934	96	86	110	17	17	22	103397	0.85034	0.916011	0.214842	0.187954	0.292105	2.49E-09	-2494964444	down
	TRIB2	ENSG00000071575	12079	9264	8996	4658	3693	3839	101369	646683	696357	43132	262333	306939	2.49E-08	-1423699124	down
	MGAT5	ENSG00000152127	4831	4722	3494	1907	2858	2309	164099	13253	10816	665579	855647	861845	2.49E-06	-1011850622	down
	TUBBP2	ENSG00000214222	7311	7002	4989	3857	2708	2658	571671	415621	357606	270059	162059	187398	2.48E-05	-1155028702	down
	ELOVL5	ENSG00000012660	17294	18740	14243	8377	7878	8103	140621	125.99	113514	681984	574751	660808	2.47E-08	-1140837909	down
	LRRC17	ENSG00000128606	289	380	368	154	162	123	470096	499054	627815	260482	350993	283916	2.47E-08	-1342123444	down
	PIF1	ENSG00000140451	730	654	457	336	265	239	111894	709511	781398	536135	367032	306128	2.45E-05	-1233866017	down
	CSPG4	ENSG00000173546	542	712	853	153	310	258	188108	199828	258795	0.53146	0.808705	0.839755	2.43E-10	-167434434	down
	AC002401.4	ENSG00000276851	219	213	124	75	33	38	713011	647864	433557	33192	0.545586	174905	2.43E-06	-2001174079	down
	AC037198.1	ENSG00000276107	35	44	34	0	7	7	134491	0.991477	117713	0	0.228711	0.338363	2.42E-05	-3144694903	down
	KNSTRN	ENSG00000128944	3282	3710	2348	1865	1630	1368	532497	475837	363578	296624	21956	22041	2.41E-05	-1034549934	down
	RPL22	ENSG00000116251	5681	3910	3705	2166	2783	1962	331818	276.67	265074	213358	188.35	167447	2.40E-05	-109123036	down
	CCNB2	ENSG00000157456	5497	5937	4030	3142	2109	2072	805685	686814	549213	430374	241451	286451	2.40E-05	-1158409068	down
	HRNR	ENSG00000197915	893	893	1147	105	260	246	129481	112286	152347	0.221268	0.378036	0.445797	2.39E-16	-2404302724	down
	PTHLH	ENSG00000087494	1855	2664	3491	921	1223	1087	54128	61021	999811	248275	296974	303731	2.39E-09	-1416938158	down
	TTYH3	ENSG00000136295	21012	17834	18276	8567	7567	8111	105823	715991	873879	415904	320339	391209	2.39E-09	-134322839	down
	HNRNPA1P48	ENSG00000224578	2447	2236	1602	1115	718	725	425164	30478	25636	177474	975727	116524	2.37E-06	-1385124008	down
	FADS1	ENSG00000149485	13633	12367	11028	5210	5200	4977	712273	529937	541966	263489	261026	257369	2.34E-11	-1377862339	down
	CCND1	ENSG00000110092	19039	17365	11009	6737	7309	5766	146428	115597	72.83	445877	723909	493309	2.34E-08	-1377052669	down
	ENTPD5	ENSG00000187097	877	854	793	382	369	349	508301	501001	639851	313565	228461	332962	2.33E-09	-1305080318	down
	CD70	ENSG00000125726	14211	18154	18789	8779	7135	7467	359843	342.85	422492	206299	133608	171574	2.31E-08	-1212189911	down
	ATP11A	ENSG00000068650	1632	1857	1585	561	1075	956	731911	798118	715271	225784	379856	376467	2.31E-06	-1095976609	down
	SLC9A3R1	ENSG00000109062	6239	5493	5846	3284	3675	2612	100.03	678747	876033	496234	49226	416044	2.29E-06	-1003609459	down
	NDUFS5	ENSG00000168653	10176	9041	7923	5592	4899	3847	552378	377537	396743	273221	201379	187318	2.29E-05	-103093562	down
	SOD2	ENSG00000112096	5672	5536	9185	2707	2708	3891	109403	104.69	165.42	52.66	852187	950724	2.29E-05	-1231678465	down
	DAG1	ENSG00000173402	20524	20126	17245	7047	8868	7938	870411	717937	690744	282123	304058	326888	2.28E-14	-1397872826	down
	SACS	ENSG00000151835	11070	11969	10201	3811	5939	6078	162038	138684	138974	537761	687785	841651	2.28E-08	-1187568009	down
	ACTN1	ENSG00000072110	20386	21608	16022	8864	9255	8231	122584	104544	913641	485754	439857	460282	2.27E-10	-1243605294	down
	S100A16	ENSG00000188643	13933	15439	10206	6989	6634	5257	301071	260.73	204886	140.57	109616	104.58	2.27E-07	-1167576798	down
	CTSC	ENSG00000109861	12915	10765	9525	4981	3795	4488	179375	125649	124615	680406	475819	674068	2.26E-08	-1422599619	down
	GGH	ENSG00000137563	9601	9932	6510	4151	3790	3299	148043	128.35	945716	594501	484141	489477	2.26E-08	-1311984651	down
	VIM	ENSG00000026025	61967	70507	53267	33760	23375	23373	2134.13	1923.46	1712.53	964561	611234	685745	2.25E-07	-1284856625	down
	PLXNA1	ENSG00000114554	10834	11523	7690	3368	5996	4409	280905	230766	187756	920121	12282	119011	2.24E-08	-1259289482	down
	SH3PXD2B	ENSG00000174705	6321	7621	8271	2659	4165	3969	187592	199477	224053	75593	946307	120152	2.24E-08	-1157924689	down
	COL14A1	ENSG00000187955	10028	7852	8804	4194	3233	3378	426627	267854	337203	21528	104152	137952	2.23E-08	-1410237756	down
	ATP6V0E2	ENSG00000171130	4986	4430	3681	2416	1781	1774	935628	662603	647733	475337	264783	325219	2.23E-06	-1230085027	down
	LFNG	ENSG00000106003	592	346	333	174	172	94	788703	394972	426434	24851	159275	135184	2.23E-06	-167835519	down
	MT-CO2	ENSG00000198712	282703	260120	284720	162145	135228	123374	10863.6	7775.47	10154.9	5668.45	3967.6	4300.48	2.23E-06	-1079641547	down
	TGFA	ENSG00000163235	3066	3400	2111	733	1160	758	185152	166579	129329	416104	614878	537101	2.22E-16	-1823229838	down
	IGF1R	ENSG00000140443	7109	8200	9638	2874	3581	3851	179429	171155	217162	56847	830202	961746	2.22E-11	-1381904588	down
	MYL9	ENSG00000101335	1071	1177	1475	490	479	458	201843	191196	251122	100148	775188	878846	2.22E-11	-1486699911	down
	PGD	ENSG00000142657	23378	24248	21687	11883	10958	9783	279458	231274	245317	134572	104604	112102	2.22E-09	-1188700415	down
	ATOX1	ENSG00000177556	7283	7506	5338	3336	3031	2614	395713	316314	259729	161873	122133	125143	2.22E-08	-126466136	down
	PTPRJ	ENSG00000149177	3275	3290	3088	1245	1873	1625	107233	876553	957053	392201	494718	530389	2.21E-09	-1151397952	down
	THAP12P3	ENSG00000227972	117	201	154	25	79	62	118401	153906	121257	0.276438	0.522225	0.620681	2.21E-05	-1629017172	down
	DHCR24	ENSG00000116133	83285	61321	61000	21511	13854	14444	435841	256419	301246	103.88	564696	698843	2.20E-14	-214605277	down
	RASSF2	ENSG00000101265	7489	8249	5359	2379	3291	2755	304129	265345	205918	977859	104822	108683	2.20E-12	-1440536249	down
	C1QL1	ENSG00000131094	1074	1096	953	490	541	430	203774	163989	171879	900277	844167	815171	2.20E-09	-1209896519	down
	NECTIN1	ENSG00000110400	3877	2741	2537	1228	1327	1212	201922	133576	148476	65672	794963	756122	2.20E-08	-1411342072	down
	AC068831.7	ENSG00000284946	691	761	432	243	340	287	666559	589412	424285	289616	319822	329783	2.20E-06	-1229828314	down
	PCYOX1	ENSG00000116005	3358	3574	3156	1026	1390	1396	177674	162799	182221	501601	704564	729391	2.19E-15	-1517633573	down
	SPCS3	ENSG00000129128	2460	2352	1820	1192	1099	1243	239018	272923	208301	126644	198846	129786	2.19E-05	-1007849529	down
	CMTM7	ENSG00000153551	5618	4384	3588	2650	1763	1482	126648	783488	781495	600063	333287	342336	2.18E-05	-1307234434	down
	TPM4	ENSG00000167460	24255	27656	28098	13594	14024	13282	235523	214565	260477	123149	105.49	120478	2.15E-09	-1069428436	down
	AC011294.1	ENSG00000233539	217	277	211	64	64	61	264038	282173	28772	0.874103	0.807018	0.766952	2.14E-13	-1995047205	down
	TIMP2	ENSG00000035862	9357	8560	11283	4995	3572	4570	852347	653026	984231	416247	313782	407246	2.14E-06	-1243407841	down
	CAVIN3	ENSG00000170955	707	916	535	408	369	282	421265	409576	336047	223037	191752	15602	2.14E-05	-1115879207	down
	EXT2	ENSG00000151348	8655	9765	8195	4340	4917	4344	611551	53948	543435	290492	271381	287082	2.13E-10	-1074943113	down
	RAB27B	ENSG00000041353	3925	4430	4848	1504	1835	2009	265692	23.7	320026	775787	144906	126689	2.12E-12	-140935077	down
	SERINC5	ENSG00000164300	4155	4459	5242	1586	2466	2279	154568	135605	182776	571589	713825	807763	2.11E-09	-1253764389	down
	CACNG4	ENSG00000075461	2194	1396	1366	671	435	458	174013	925644	106136	553017	26377	357795	2.11E-08	-1773852483	down
	SELENOT	ENSG00000198843	5581	6574	4789	2870	3404	2785	117964	119.17	100.66	615784	54.73	557424	2.10E-08	-1010432081	down
	PKIA	ENSG00000171033	444	503	320	186	192	165	515201	509763	457786	227757	285731	234152	2.10E-07	-1323910133	down
	EPHA2	ENSG00000142627	39249	28470	24429	16495	14018	14306	205403	119387	119406	784703	578872	705707	2.10E-05	-1154703268	down
	PPIL2	ENSG00000100023	2541	2789	2303	1340	1439	1205	244397	217928	225918	136836	111312	104043	2.09E-08	-1044910818	down
	PTPRS	ENSG00000105426	4837	5812	5578	1952	2531	2382	238383	23227	249704	80386	106259	101554	2.08E-15	-1349460389	down
	PFKP	ENSG00000067057	12070	11627	10029	6080	5523	5208	121845	876356	889143	570315	421549	490704	2.08E-07	-1107854666	down
	SORBS2	ENSG00000154556	14695	9767	7911	4642	4212	4719	178239	952051	87654	472694	414537	443491	2.08E-06	-1374881065	down
	ECM1	ENSG00000143369	3015	3718	3187	953	1261	834	341124	328553	33219	111095	11144	927331	2.07E-26	-1819753914	down
	CYP51A1	ENSG00000001630	689	655	561	189	294	261	84905	577857	633145	324277	289935	323599	2.07E-10	-1484588485	down
	BTBD19	ENSG00000222009	781	753	1208	399	524	459	892915	673442	107696	391786	476954	487992	2.07E-05	-1114139949	down
	FLNA	ENSG00000196924	190927	182230	154429	54828	75632	62168	662352	509.11	511284	403306	228342	219328	2.06E-17	-1580453027	down
	RGS4	ENSG00000117152	674	879	906	91	195	245	132561	115985	146287	147407	294488	402942	2.06E-14	-2321909231	down
	ANK1	ENSG00000029534	1105	1451	1299	436	769	646	356239	42239	516108	208279	261188	223929	2.06E-08	-1177410881	down
	TSHZ1	ENSG00000179981	747	925	828	296	558	447	385859	382662	393766	161505	223776	222699	2.06E-06	-1068117428	down
	LRIG1	ENSG00000144749	7621	7453	5582	2869	3625	3435	571879	426653	366966	19317	21315	247174	2.05E-08	-1173188076	down
	ABCA2	ENSG00000107331	5441	5121	6024	1404	1884	1853	241188	18609	21526	104303	575505	629331	2.04E-19	-1812154115	down
	PMEPA1	ENSG00000124225	23270	19403	15572	6104	4805	4842	183736	139489	119944	456289	428884	411444	2.04E-15	-1989929628	down
	CIB2	ENSG00000136425	372	354	440	192	230	191	912122	710034	968408	480271	492572	473711	2.03E-05	-1049385595	down
	SPINT1	ENSG00000166145	2084	1683	1559	779	854	751	246711	162161	176204	925863	834685	963219	2.02E-08	-1283850089	down
	MGMT	ENSG00000170430	851	676	750	370	337	263	131985	861194	109245	573135	425432	404341	2.02E-07	-1350868503	down
	RNU6-26P	ENSG00000206712	186	220	94	8	40	62	0	302532	437107	0	0	0	2.02E-05	-2295511092	down
	BIRC5	ENSG00000089685	12972	13073	8014	6580	4566	4365	128.48	104988	741266	648577	382874	439955	2.02E-05	-1220235224	down
	ACTB	ENSG00000075624	250749	219426	186336	92505	67969	71985	3667.31	2482.72	2530.64	1126.29	764304	942362	2.01E-10	-1594102946	down
	MGST3	ENSG00000143198	2645	2301	2433	1297	1159	1040	793927	545419	68383	364862	258086	285192	2.01E-07	-1188285292	down
	MATN2	ENSG00000132561	1130	887	1108	502	404	488	890129	592458	824603	444583	315357	365797	2.01E-06	-1270211331	down
	APMAP	ENSG00000101474	12452	12613	9308	6444	6425	5356	110415	880824	775774	53894	433909	440952	2.01E-06	-1022378895	down
	SUMF2	ENSG00000129103	12340	11109	11473	4826	4224	4075	169111	124038	144713	647611	460413	538197	2.00E-12	-151764043	down
	ADGRA3	ENSG00000152990	6186	7118	6095	2849	3870	3147	346015	309773	306646	171215	177216	203627	2.00E-11	-1091592626	down
	WNT5A	ENSG00000114251	208	285	305	85	177	109	154991	184198	197166	0.561495	0.837165	0.705809	1.98E-05	-1239061298	down
	PHEX	ENSG00000102174	654	728	738	270	534	359	246679	227318	257511	0.999848	15174	130185	1.98E-05	-1006557735	down
	THSD4	ENSG00000187720	889	1054	662	220	364	285	325332	32166	249738	0.706852	112837	0.794165	1.97E-13	-1704272973	down
	TMEM40	ENSG00000088726	1497	1231	1076	507	592	343	223136	135781	146127	758083	622888	702384	1.97E-09	-1536000298	down
	PLIN3	ENSG00000105355	5639	6753	6056	2771	3909	3118	715393	637121	699853	340282	377159	347541	1.96E-10	-1029676878	down
	FUT8	ENSG00000033170	2467	3041	2023	1117	1367	1153	298028	270773	216866	125753	122539	130983	1.96E-09	-1154381204	down
	HSP90AA1	ENSG00000080824	105006	140706	94275	52725	73704	56142	645388	688009	542333	300294	348447	317421	1.96E-08	-1005806855	down
	CDC25B	ENSG00000101224	19737	21797	17372	11640	9177	8834	149.62	129824	122376	802008	554433	636574	1.96E-06	-1078273918	down
	ARL4C	ENSG00000188042	4725	4113	6612	2358	1742	2352	27954	193755	357366	138582	837262	130938	1.96E-06	-1354527847	down
	PDGFRA	ENSG00000134853	2739	2346	2619	928	1108	1507	167633	118558	157647	535548	691054	858612	1.96E-06	-1232555314	down
	ADAM12	ENSG00000148848	5395	4455	5875	1390	1418	1385	217609	156283	208742	450586	596803	631875	1.94E-20	-2025150358	down
	SLC22A18	ENSG00000110628	311	205	235	82	133	109	78116	474773	852624	211055	279458	325121	1.94E-05	-1364209237	down
	MYO9B	ENSG00000099331	5386	5890	5283	2338	3370	3080	338329	278273	27168	216315	173343	184053	1.92E-08	-1031931872	down
	ANTXR1	ENSG00000169604	2752	2686	3272	1137	1246	1323	147233	125384	159424	63991	649176	774911	1.91E-10	-1343011809	down
	NUCB1	ENSG00000104805	7423	7197	7546	4093	3660	3330	114349	845747	118425	544929	42544	469417	1.91E-07	-110433421	down
	LIPG	ENSG00000101670	1937	1219	1060	364	376	385	199405	11116	114106	356434	372191	443883	1.90E-12	-2038187413	down
	VCL	ENSG00000035403	25723	23009	22975	11338	11158	11688	986463	719957	815332	412829	341885	425677	1.89E-08	-1178012583	down
	ALDH1B1	ENSG00000137124	2289	2497	1678	975	1285	1039	180972	16161	126942	765029	825853	804918	1.89E-07	-1086309654	down
	SSH1	ENSG00000084112	7749	9254	10605	3854	5513	5514	254458	239181	291303	762623	16526	177706	1.89E-06	-1004048635	down
	ACTN4	ENSG00000130402	40475	42386	36905	18564	19901	17923	452703	375854	384473	152091	170588	179415	1.88E-11	-1194426066	down
	PARVB	ENSG00000188677	494	534	422	258	251	196	123052	101816	938031	574618	475896	410658	1.88E-06	-1145406606	down
	LINC00601	ENSG00000235180	141	203	189	52	85	63	240244	298361	336532	127231	119351	0.918562	1.87E-07	-1528387919	down
	TRIP13	ENSG00000071539	1923	2220	1162	970	773	686	186081	191439	101894	110445	844326	7666	1.87E-05	-1211750813	down
	RBP4	ENSG00000138207	977	1106	632	220	333	253	253444	229127	154801	575159	652552	571642	1.86E-14	-1872019528	down
	FOLR1	ENSG00000110195	117	136	230	56	36	60	331015	318155	610255	176744	0.93536	162693	1.86E-05	-1748665005	down
	LINC01204	ENSG00000229563	32	172	63	9	24	15	0.308148	110712	0.429817	0.0708054	0.151185	0.176937	1.86E-05	-2538458435	down
	SDC1	ENSG00000115884	10816	9964	7766	3274	3273	2914	868711	649032	531321	225048	194481	214725	1.85E-15	-1704643259	down
	AC099850.3	ENSG00000265415	466	523	319	98	141	101	151567	165473	128874	346197	584886	523742	1.85E-15	-2063331737	down
	COL4A6	ENSG00000197565	4145	3846	3229	986	1230	1099	144446	119655	111813	393064	423792	483848	1.84E-21	-1880273296	down
	COL15A1	ENSG00000204291	156	113	143	31	32	34	0.85115	0.457201	0.551853	0.162146	0.110333	0.167719	1.84E-09	-2211794824	down
	CTGF	ENSG00000118523	25746	19024	26324	8265	6089	10103	239943	144055	231325	726317	447205	870975	1.84E-08	-1636904741	down
	COL1A1	ENSG00000108821	24720	14038	26368	6896	5568	5273	82455	376272	843379	220731	167912	186801	1.83E-11	-2002581695	down
	ERGIC1	ENSG00000113719	9921	9532	10018	4750	3550	4174	80985	633673	763838	384072	262115	339422	1.83E-08	-1331337284	down
	PIGU	ENSG00000101464	2180	1966	1626	874	777	623	285701	212698	204384	110402	832951	764238	1.82E-09	-1453709574	down
	NLGN1	ENSG00000169760	961	1222	1058	532	498	570	95482	993928	101605	450536	411995	529171	1.81E-07	-1104721215	down
	RABEP2	ENSG00000177548	972	1188	691	512	565	361	898654	877435	628236	477319	491826	451364	1.80E-05	-1093322144	down
	MET	ENSG00000105976	9318	14385	7966	4452	6580	4713	339997	400496	263079	148594	182675	15567	1.77E-07	-1111265435	down
	TGFB2-AS1	ENSG00000232480	347	278	243	114	138	144	0.43481	0.757649	0.804363	196554	108128	0.981864	1.76E-05	-1255560646	down
	INCENP	ENSG00000149503	3302	4229	2679	1121	1445	1229	289469	291849	247039	114306	991595	109653	1.75E-15	-1531464798	down
	SHC3	ENSG00000148082	1534	1996	1658	591	614	711	376873	388972	448173	172239	114716	221823	1.75E-14	-1525394372	down
	RCAN2	ENSG00000172348	2580	1822	1677	1013	740	745	214753	124677	134123	812636	524881	62946	1.75E-06	-1393085498	down
	CDH4	ENSG00000179242	610	671	550	193	253	216	380845	327434	320927	108627	122351	127299	1.74E-14	-1582512837	down
	PTGFRN	ENSG00000134247	7296	8058	8398	2757	3919	3436	267226	246754	287287	159977	11.72	129334	1.74E-14	-1351538944	down
	OLFML2B	ENSG00000162745	214	208	302	48	82	60	179841	144395	246078	0.476704	0.560656	0.509981	1.74E-11	-2067455503	down
	ITGAV	ENSG00000138448	11592	12963	11398	3890	6551	5302	588097	525243	540697	160881	273448	240485	1.73E-12	-1318706651	down
	ENTPD3	ENSG00000168032	1077	1180	829	208	262	263	104362	956673	782054	196554	17842	26098	1.72E-23	-2181787542	down
	MLLT11	ENSG00000213190	8762	7686	8148	3290	2772	3117	711719	49707	634637	261948	179163	24.63	1.72E-11	-15241372	down
	KCTD4	ENSG00000180332	1085	1261	864	634	479	467	140954	129545	108162	790121	501419	582195	1.72E-05	-1105341245	down
	ITGB1	ENSG00000150093	35767	32750	30216	11520	14556	13144	222.85	167025	182913	657855	702387	756791	1.71E-14	-1454700539	down
	TMEM19	ENSG00000139291	1096	1040	739	347	279	286	261721	189664	208828	901678	728699	872027	1.71E-11	-1753624783	down
	EMILIN3	ENSG00000183798	289	298	275	96	175	126	233083	213253	223347	0.959009	125353	106936	1.71E-06	-1253928813	down
	LAMA5	ENSG00000130702	19777	15275	17573	6464	7759	8118	802783	544143	609651	497219	288871	320765	1.70E-09	-1362096639	down
	COL19A1	ENSG00000082293	400	487	512	109	208	270	255724	26036	298694	0.567927	110329	176328	1.69E-05	-1362783558	down
	CRTAP	ENSG00000170275	18468	18246	16666	7693	5796	5966	248101	193263	209671	101165	641803	777916	1.68E-11	-1547774565	down
	TUBA1B	ENSG00000123416	29662	27651	19952	13656	14307	11193	1578.49	1151.11	975737	705329	546097	532.65	1.68E-06	-109643109	down
	ARSD	ENSG00000006756	890	771	752	404	561	361	73716	570359	58221	305869	347121	25827	1.67E-05	-1003124285	down
	AP006621.3	ENSG00000255284	305	263	335	139	181	118	125342	102331	14797	606103	529988	512235	1.67E-05	-1179709992	down
	HNRNPA1P10	ENSG00000214223	1202	1293	721	298	574	500	243783	19792	13.01	562481	873901	100711	1.66E-06	-1356774836	down
	COL7A1	ENSG00000114270	10901	12162	11532	3900	4641	4366	504714	484455	453062	364817	189532	209898	1.65E-20	-153084672	down
	FASN	ENSG00000169710	28108	23664	19212	8608	10215	9899	882337	609872	543551	408849	258363	311945	1.65E-10	-1427526288	down
	NRP1	ENSG00000099250	5468	9351	5902	2104	3635	2889	442183	578441	461286	143019	251107	205779	1.65E-10	-1366499555	down
	RBBP7	ENSG00000102054	24783	24259	20963	13612	11823	10838	271236	214587	218562	144354	101442	110495	1.65E-06	-1049537489	down
	TGFBI	ENSG00000120708	8431	6440	7323	613	954	816	676015	435179	581036	756455	765559	878587	1.64E-53	-336305609	down
	ENDOD1	ENSG00000149218	980	1061	1247	321	409	452	528915	470914	627088	178211	178183	233995	1.64E-12	-1585861785	down
	TMEM8B	ENSG00000137103	1279	1368	1336	563	637	540	977766	823902	904938	348577	469916	394521	1.64E-12	-1306561039	down
	FBN1	ENSG00000166147	6125	6302	5325	2397	3357	2843	213067	165497	184672	15383	114965	105292	1.64E-10	-1168232204	down
	ASPH	ENSG00000198363	7407	8324	8496	3814	4673	3999	577405	51616	620517	237238	277844	298758	1.63E-10	-1069131961	down
	SPOCK1	ENSG00000152377	2863	3757	3035	1270	1382	1264	286295	222853	206162	597539	952399	757941	1.62E-16	-1397428842	down
	GOLIM4	ENSG00000173905	3924	4215	3117	1596	2085	1935	282723	24471	211343	110363	122598	130713	1.62E-08	-1115947342	down
	FDPS	ENSG00000160752	7532	5697	4533	3004	2521	2151	336.51	201019	188277	141958	907052	90072	1.60E-06	-1326021327	down
	SLC5A3	ENSG00000198743	4586	5404	7036	2102	3385	3390	98572	91929	137954	452165	564304	689076	1.60E-05	-1058405569	down
	SPOCD1	ENSG00000134668	89	219	258	26	86	54	131732	217593	27782	0.342991	0.787696	0.76952	1.60E-05	-1898241617	down
	CDKN1A	ENSG00000124762	17704	15788	20532	10496	9091	9125	185787	134703	203017	106439	776724	896403	1.60E-05	-1017884166	down
	RUNX1	ENSG00000159216	8611	10871	8976	4621	5319	4874	374938	484379	392059	19445	290402	230149	1.59E-10	-1041796686	down
	TMEM53	ENSG00000126106	482	463	474	220	253	206	116671	89143	116252	441619	362255	460682	1.59E-07	-1182489306	down
	BRCC3	ENSG00000185515	2491	2884	2330	1051	1649	1435	238828	216734	210353	958071	129579	137542	1.59E-07	-1016847365	down
	MYLK	ENSG00000065534	4152	5650	4193	1342	2983	2189	211248	204684	189557	728853	107192	109271	1.59E-07	-1232965971	down
	AC000089.1	ENSG00000235776	254	267	181	115	102	89	853308	698601	580996	388593	275489	296047	1.58E-05	-1297935608	down
	CDHR1	ENSG00000148600	235	289	185	80	98	97	144044	139067	115535	0.718245	0.654908	0.426522	1.57E-07	-1467136631	down
	LINC00941	ENSG00000285517	1486	1674	946	282	808	524	170315	187979	104861	648262	102154	608221	1.57E-06	-1498777837	down
	NUF2	ENSG00000143228	4250	4351	2983	2203	1544	1755	534898	42682	362844	250745	157791	212657	1.57E-05	-1156854537	down
	HMGB1P6	ENSG00000259781	1449	1245	803	367	806	323	584163	380954	296251	113862	248191	120733	1.57E-05	-1401500435	down
	ANKRD10-IT1	ENSG00000229152	207	246	259	75	87	98	11351	151426	167146	0.608129	0.61317	0.665644	1.56E-08	-1555661001	down
	TRMT9B	ENSG00000250305	1155	1164	908	330	493	569	701558	603278	529073	182767	29187	377633	1.56E-07	-1327454645	down
	IL7R	ENSG00000168685	6957	6287	5692	2517	2219	2210	492766	363688	417094	151581	134741	154547	1.55E-12	-1551572787	down
	HGSNAT	ENSG00000165102	5755	5339	5288	2333	2025	2055	307576	236332	284882	118362	875452	122037	1.55E-11	-1455610264	down
	COL25A1	ENSG00000188517	341	304	239	73	135	103	188986	130608	139911	0.372232	0.512781	0.749399	1.55E-08	-1648185716	down
	FLNB	ENSG00000136068	7881	8630	7285	3265	5278	4046	291878	24232	238222	203694	121659	125071	1.55E-08	-1046863987	down
	SVEP1	ENSG00000165124	1127	888	1113	215	392	285	218922	141179	201314	0.412407	0.584912	0.572757	1.54E-15	-1963110866	down
	ASPM	ENSG00000066279	9208	9861	7022	3783	3163	4003	20056	167402	138917	100717	553066	845512	1.54E-08	-1338254798	down
	PDK3	ENSG00000067992	1453	1453	1593	456	860	703	155583	141503	160025	576946	779722	823717	1.54E-08	-1294071775	down
	SLC39A8	ENSG00000138821	2813	3314	2637	1339	1777	1282	215636	226445	183505	990947	128238	104837	1.53E-10	-1111433886	down
	PSAP	ENSG00000197746	74961	71736	91119	37788	48432	39843	669.96	424968	798048	265246	291693	287552	1.53E-07	-1041469473	down
	NME2P1	ENSG00000123009	903	916	659	478	387	334	770026	598408	520786	375934	256921	26316	1.53E-05	-1143966956	down
	DKK1	ENSG00000107984	16169	17026	17669	6584	5039	6660	437526	377289	452568	172.5	103786	162232	1.52E-11	-1560719317	down
	TPCN1	ENSG00000186815	4064	3988	4103	2109	2120	2122	224834	165328	222912	119926	922075	10496	1.52E-07	-1043189944	down
	CERK	ENSG00000100422	3394	3336	2670	1423	1771	1515	190722	159448	148011	839065	991796	979975	1.51E-08	-1116113643	down
	MKI67	ENSG00000148773	29236	35661	21558	11122	14898	15333	582407	566476	408666	306708	235448	281323	1.51E-07	-1165342001	down
	UXS1	ENSG00000115652	2930	2537	2320	1503	993	1133	323565	236005	251378	172198	103711	13096	1.51E-05	-1192830347	down
	ATP8B3	ENSG00000130270	404	376	370	122	130	123	466473	346787	394592	143408	107484	13352	1.50E-12	-1731111316	down
	GLG1	ENSG00000090863	11033	13834	10563	4956	6641	5541	434308	447865	426447	199687	225485	228046	1.50E-12	-1156788121	down
	CAPG	ENSG00000042493	1608	1755	1632	799	995	793	381792	351404	371771	201315	187908	170109	1.50E-09	-1065405676	down
	SCD	ENSG00000099194	35811	21441	27804	10358	9486	11339	143.06	683057	103475	399916	300301	42.43	1.50E-08	-157245423	down
	ARHGAP33	ENSG00000004777	2134	2340	1453	952	1018	716	186554	145219	118308	691319	841018	495129	1.50E-07	-1250780954	down
	ACBD7	ENSG00000176244	265	331	284	146	174	149	478726	432427	420495	200604	212383	232202	1.50E-05	-1013157962	down
	TMEM171	ENSG00000157111	379	586	258	200	156	123	741186	928558	463483	406913	247992	241549	1.50E-05	-1420962273	down
	AC069499.1	ENSG00000241634	136	175	105	61	41	43	608047	593725	481655	302101	113932	23509	1.50E-05	-1596698324	down
	COL6A1	ENSG00000142156	36501	37252	32174	11983	13151	11571	184017	154231	156675	699712	543284	573217	1.49E-20	-1639793125	down
	CEMIP	ENSG00000103888	944	921	405	64	193	114	565447	36045	259483	0.742002	0.903543	116104	1.49E-14	-2775546972	down
	ROBO2	ENSG00000185008	1699	1002	1104	312	316	369	121065	647359	757017	29001	234213	211939	1.49E-12	-2063486897	down
	B4GAT1	ENSG00000174684	1291	1313	1467	689	683	669	154362	126006	160537	814093	636423	768358	1.49E-07	-1101835848	down
	AC022149.1	ENSG00000269378	1518	1204	1292	703	605	573	432172	272421	321976	167583	123187	150761	1.49E-06	-1206292125	down
	PODXL	ENSG00000128567	3826	2834	3213	1699	1762	1762	170726	101185	143294	665915	64544	781352	1.49E-05	-1042003097	down
	METTL7B	ENSG00000170439	1521	1644	1230	289	471	329	278472	238169	214392	548582	702386	623713	1.47E-25	-2143079268	down
	WNT7B	ENSG00000188064	3760	4183	2137	991	1275	963	218716	195442	119482	599692	592212	553562	1.47E-12	-1756179807	down
	MIR221	ENSG00000207870	93	96	114	28	41	26	219875	0	0	0	0	0	1.47E-06	-1803070004	down
	LAPTM4B	ENSG00000104341	7078	7524	6605	3517	4015	3508	68127	56846	606604	280466	302105	299018	1.46E-09	-105247656	down
	FAT1	ENSG00000083857	17716	18337	18045	5425	10204	9729	515934	365032	442025	333247	202756	22838	1.46E-07	-1223266122	down
	FKBP10	ENSG00000141756	9294	8347	7338	4960	4162	4072	896327	668255	67215	465701	332394	37385	1.46E-05	-1023725837	down
	PCDHB5	ENSG00000113209	377	470	514	198	201	212	417884	371385	449385	182749	187109	209276	1.45E-07	-1251752837	down
	TM4SF1	ENSG00000169908	2200	2717	3308	1339	1250	1445	290434	275745	418036	168281	123631	182426	1.45E-06	-1118057382	down
	CNIH2	ENSG00000174871	448	423	374	219	113	152	107313	686528	810158	437864	252368	424655	1.45E-05	-1439251013	down
	HNRNPA1P35	ENSG00000225695	75	83	50	20	16	18	0.530448	0.416156	0.0492184	0.193718	0.202976	0.0481264	1.45E-05	-2038645254	down
	AHNAK2	ENSG00000185567	1738	1998	2693	423	1382	910	506763	376358	639319	238276	31328	224524	1.45E-05	-1406148799	down
	SLC25A35	ENSG00000125434	319	351	326	147	191	187	531613	40177	456426	269952	230737	281609	1.45E-05	-1035276117	down
	DBI	ENSG00000155368	7799	6793	5870	3771	2953	2755	336313	228.3	237992	148019	958228	107.33	1.43E-06	-1212439762	down
	ALDH5A1	ENSG00000112294	1055	1004	941	386	446	443	569959	502765	454911	183374	248908	23754	1.41E-10	-1348633237	down
	ABCC3	ENSG00000108846	4400	3356	4064	1973	1817	1471	274135	211281	261323	146616	126127	111325	1.41E-07	-1289457842	down
	CALD1	ENSG00000122786	40288	29784	38357	16661	16158	18683	289759	185.96	265641	100645	102384	125.52	1.41E-06	-1190894815	down
	AL359922.2	ENSG00000265194	125	177	151	42	58	66	129611	155524	13486	0.463882	0.419305	0.625222	1.41E-06	-1545773986	down
	LSS	ENSG00000160285	1174	1164	900	306	731	531	511893	334445	372626	116652	156413	174843	1.41E-05	-1195810054	down
	LDLR	ENSG00000130164	13953	12884	13882	3338	3410	4450	823883	586872	716222	222331	181292	248044	1.40E-18	-1965869764	down
	DPYSL3	ENSG00000113657	14562	17135	13636	6701	7936	5948	603756	611365	538039	265615	342158	253578	1.40E-13	-1249299813	down
	BLACAT1	ENSG00000281406	421	295	308	154	90	100	406621	240529	304695	156075	0.763806	0.894616	1.40E-06	-1675086148	down
	MMP14	ENSG00000157227	5488	6641	11008	1956	3722	3616	361729	340099	629497	120312	186162	229329	1.40E-06	-1443383957	down
	AL359551.1	ENSG00000231877	74	64	97	20	3	18	0.708739	0.512195	0.773617	0.169931	0.0353781	0.154231	1.40E-05	-2578182424	down
	HS6ST2	ENSG00000171004	1202	1399	1484	530	737	763	906279	824133	10306	267332	427512	47135	1.39E-07	-1119470144	down
	ADAM23	ENSG00000114948	1149	1091	1389	286	355	320	945248	857302	11463	278685	220176	323122	1.38E-21	-2038844942	down
	NAGA	ENSG00000198951	1473	1471	1476	590	672	654	138047	110994	131556	531794	45231	573748	1.38E-11	-1317942793	down
	MCAM	ENSG00000076706	9732	8203	8386	3736	3817	3635	671863	444782	571271	253433	200801	236251	1.38E-10	-1351058862	down
	PAPPA	ENSG00000182752	3743	4287	5416	1258	2206	2158	101806	948499	137292	341343	479195	568954	1.38E-08	-1381726002	down
	LINC00342	ENSG00000232931	553	599	482	252	202	198	587702	500836	445906	249396	157082	186823	1.38E-08	-1417546623	down
	AL133330.1	ENSG00000251194	63	84	156	12	18	30	13392	11672	240858	0.0715953	0.301696	0.570827	1.38E-06	-2437583547	down
	FAM72B	ENSG00000188610	916	1148	810	522	403	416	123076	140567	115806	728112	478798	548078	1.38E-06	-1178781687	down
	PICART1	ENSG00000246640	129	122	104	49	45	37	0.712015	0.605494	0.430276	0.310714	0.217985	0.291519	1.38E-05	-1548846788	down
	MMP2	ENSG00000087245	2165	1896	1587	322	593	340	227476	150447	160697	47173	536499	406439	1.37E-22	-2325279747	down
	NRP2	ENSG00000118257	16887	16337	17249	4375	6014	6640	95189	81249	942258	236336	371019	42011	1.37E-15	-1684752919	down
	LTBP1	ENSG00000049323	1453	1430	1065	398	709	428	774544	582954	522169	200488	370564	235411	1.37E-10	-1507726104	down
	SPARC	ENSG00000113140	94663	69108	65251	32875	25348	28256	1808.57	1064.48	1174.99	534583	384485	506436	1.37E-08	-151324343	down
	GSR	ENSG00000104687	6685	7890	7198	3247	4208	3640	506592	49513	543608	217884	25694	275541	1.36E-11	-1084047532	down
	HHAT	ENSG00000054392	636	655	485	263	260	227	512368	450909	353353	227309	159433	17328	1.36E-08	-1349159831	down
	DHCR7	ENSG00000172893	9001	7651	4759	3507	2894	2292	787788	536887	397053	288328	226843	193706	1.36E-06	-1408995444	down
	PCDHGC3	ENSG00000240184	6084	5154	5820	1213	1802	1884	918411	595087	824884	29579	217719	275255	1.35E-17	-1929210393	down
	CMBL	ENSG00000164237	718	909	778	320	380	332	839974	814349	842963	372897	412919	396613	1.35E-12	-1324200986	down
	SCD5	ENSG00000145284	17738	15539	12666	6394	5598	5541	125497	867283	840594	424665	314808	368275	1.35E-10	-1495499625	down
	HSPA8	ENSG00000109971	63835	89094	54553	27079	41898	28358	796728	857848	646405	260.12	394013	322601	1.35E-09	-1206000588	down
	CD109	ENSG00000156535	10174	9539	9010	2257	3032	2927	308299	242554	262693	558728	800649	875659	1.34E-23	-1927665576	down
	DRD2	ENSG00000149295	688	851	496	306	400	245	762154	686282	44891	294976	301539	209728	1.34E-06	-1212116593	down
	NES	ENSG00000132688	35949	29472	36915	10284	11607	12008	139386	909882	133459	381149	351758	435105	1.33E-15	-1714928897	down
	SLIT3	ENSG00000184347	802	522	788	256	210	246	402115	223903	370126	195437	0.910579	114059	1.33E-08	-168580986	down
	TUBB6	ENSG00000176014	5825	5880	4658	3136	2681	2276	788826	610393	614698	502468	301354	322676	1.33E-06	-1115406073	down
	SLC9A3	ENSG00000066230	115	161	152	42	62	56	186361	141971	191998	144056	12178	123784	1.33E-06	-1526730055	down
	ACTG1	ENSG00000184009	191608	151347	129426	54005	34890	38950	2173.4	1400.98	1366.64	578325	305995	401007	1.32E-12	-198087678	down
	POMGNT1	ENSG00000085998	7614	7861	6324	3709	4045	3342	640122	531553	477586	339558	274788	223101	1.32E-08	-1085290053	down
	AC007996.1	ENSG00000277534	175	228	158	86	84	79	149146	149431	135726	0.831159	0.558625	0.606406	1.32E-05	-1264015636	down
	VASH1	ENSG00000071246	392	508	499	153	166	209	411268	379631	35732	133406	127548	173752	1.31E-09	-1497134604	down
	SLC2A1	ENSG00000117394	32145	24946	24124	11408	8500	9500	248755	165973	178088	850461	535585	718895	1.31E-09	-1568679557	down
	CENPE	ENSG00000138778	5708	6061	4458	2819	2158	2622	143631	128944	114198	667942	587062	690052	1.31E-06	-1178055971	down
	P3H1	ENSG00000117385	5373	5910	4239	2964	2643	2087	485019	416903	347634	289608	214476	18551	1.31E-06	-111028184	down
	CCDC134	ENSG00000100147	387	385	272	142	226	131	688313	590051	450985	259028	316074	239672	1.31E-05	-1202954244	down
	SLC44A3-AS1	ENSG00000224081	243	307	328	140	148	148	444257	442155	522244	218402	211773	285612	1.31E-05	-1108665358	down
	ARHGEF4	ENSG00000136002	3239	3779	4667	1571	1670	1815	213087	189331	262563	110657	802794	109814	1.30E-09	-1308505763	down
	AC114811.2	ENSG00000260641	241	294	317	115	144	113	113659	113268	135734	0.501837	0.499636	0.531465	1.30E-07	-130819982	down
	FN1	ENSG00000115414	24499	27712	30321	6469	11316	9227	806372	707677	972965	400111	295557	272797	1.28E-18	-1741380703	down
	Z83843.1	ENSG00000271533	285	333	259	98	125	152	181889	170627	161369	0.638295	0.686928	0.925872	1.28E-06	-1326067368	down
	ITGA3	ENSG00000005884	54716	44957	38472	13349	12333	11264	267186	175744	175007	64998	55136	604125	1.27E-18	-2016727058	down
	CYBC1	ENSG00000178927	3720	3428	3666	1820	1773	1810	502743	374466	499569	270061	211374	25122	1.27E-07	-110940947	down
	ESPL1	ENSG00000135476	6228	6345	3737	2531	2462	2535	27162	254369	195305	124419	957882	120413	1.27E-06	-1214308178	down
	VCAN	ENSG00000038427	45405	34413	25465	6490	7869	9313	131068	752974	700323	298139	178389	252063	1.26E-17	-2275921453	down
	LOXL2	ENSG00000134013	2110	2209	2646	891	741	663	155152	133846	176609	6307	502935	484082	1.26E-13	-1700466607	down
	SRPX2	ENSG00000102359	7485	7640	6888	2047	2070	1713	791451	679993	677764	233131	205389	176782	1.25E-27	-2025722286	down
	PLXND1	ENSG00000004399	10849	7374	8383	3079	3166	3027	815744	43112	576728	349359	201246	269676	1.25E-11	-1649786648	down
	FBLIM1	ENSG00000162458	4786	6228	4878	2438	3351	2774	449071	441722	407679	186397	256786	231962	1.25E-09	-1000770448	down
	MSNP1	ENSG00000251593	511	653	460	156	212	196	482027	484651	422889	172898	164882	149347	1.24E-13	-1630522529	down
	B4GALT1	ENSG00000086062	6860	6801	6466	3457	3944	3237	36605	294189	321066	176332	165996	162074	1.24E-08	-1036624369	down
	CDCA3	ENSG00000111665	5225	4807	2609	2016	1159	1112	111674	847244	513988	411708	195341	240161	1.24E-06	-1641623405	down
	COL24A1	ENSG00000171502	3889	3037	5671	1099	1208	1644	123062	759048	170244	345808	346228	494119	1.23E-09	-1787914124	down
	PTPRG	ENSG00000144724	2200	1730	1466	639	983	799	101809	700513	690468	296992	384085	394709	1.23E-07	-1298851307	down
	SGO2	ENSG00000163535	1670	2212	1432	985	841	944	107654	113946	876688	610333	424452	556691	1.23E-05	-1016789735	down
	NTRK2	ENSG00000148053	34911	29838	34409	9217	9853	11123	109046	74439	100.56	273707	252081	332883	1.22E-17	-1829191394	down
	GAS6-AS1	ENSG00000233695	366	240	241	89	103	100	136033	0.896565	0.897806	0.365768	0.393613	0.361878	1.22E-07	-1671508486	down
	LINC00565	ENSG00000260910	332	290	240	135	99	73	350358	261655	267797	15374	0.789571	0.885353	1.22E-06	-1594793604	down
	PLK1	ENSG00000166851	5617	6037	3547	2889	1782	1628	725773	627436	435552	366429	20745	227586	1.21E-05	-1347231946	down
	TTK	ENSG00000112742	4009	4345	3241	2105	1607	2080	301942	263742	235624	149872	994608	142104	1.21E-05	-1082449792	down
	HNRNPA1	ENSG00000135486	49159	45687	34493	22522	22512	20968	769005	557172	506695	339868	269748	299.19	1.20E-06	-1080080558	down
	FAM122B	ENSG00000156504	4851	5693	4049	1860	1976	2286	478101	451228	424285	191898	169857	234698	1.19E-10	-1345625539	down
	NOMO3	ENSG00000103226	279	111	124	31	25	43	17625	0.724535	0.624153	0.19905	0.205467	0.17443	1.19E-07	-2515075604	down
	DNM1	ENSG00000106976	6858	7142	8455	3970	3862	4060	500769	102931	110962	260557	211609	272549	1.19E-06	-1018928825	down
	CD99L2	ENSG00000102181	7663	6578	6309	3033	2651	2794	487128	348747	389598	186299	148321	183396	1.18E-09	-1383381879	down
	ATG4A	ENSG00000101844	5067	4526	4063	1956	2271	2074	556968	378641	445023	20923	198652	223837	1.18E-09	-1235812045	down
	TAGLN2P1	ENSG00000253676	446	423	360	152	108	135	177552	136968	136295	657583	385971	474131	1.18E-09	-1728730131	down
	EEF1A1	ENSG00000156508	280879	249401	195898	126294	133091	113362	2975.98	2038.86	1871.06	1179.9	1069.75	1068.36	1.18E-06	-1079331681	down
	LEMD1	ENSG00000186007	347	175	319	116	73	91	117862	4375	917743	438749	202967	318317	1.18E-05	-1704632248	down
	GM2A	ENSG00000196743	920	1047	1227	302	378	397	603245	540405	742833	19419	192683	269847	1.17E-14	-1676883643	down
	AMMECR1	ENSG00000101935	2716	3075	2608	1189	1545	1410	122503	111221	120131	521381	579466	754354	1.17E-10	-1130549839	down
	PRDX1	ENSG00000117450	19787	20336	19692	10656	9480	7871	695118	557111	640867	341427	252023	253739	1.17E-08	-1197180926	down
	TBC1D8	ENSG00000204634	2303	2911	1966	1083	1447	1144	166442	173434	125579	69374	786414	798808	1.17E-08	-107546675	down
	GPC6	ENSG00000183098	2079	1667	1621	793	873	848	130272	951547	111702	51335	52621	512084	1.17E-07	-1216289215	down
	GPR39	ENSG00000183840	162	185	196	66	97	56	368294	347002	395391	146303	194891	148667	1.17E-06	-1438323094	down
	TPST2	ENSG00000128294	1888	1798	2002	808	904	703	17308	138178	169674	746405	755356	622719	1.16E-11	-1356200099	down
	RPN2	ENSG00000118705	46234	41475	35275	19116	16856	14681	441051	316864	316746	170649	133362	132928	1.16E-09	-1387479622	down
	CD151	ENSG00000177697	14448	13411	12611	7261	5864	5392	325777	239.01	270939	144476	105702	117.23	1.16E-07	-1228836985	down
	TMSB4X	ENSG00000205542	105443	83085	85236	48766	32719	35131	4510.54	2804.82	3434.77	1937.88	1091.54	1289.07	1.16E-06	-1329457815	down
	PTMS	ENSG00000159335	11920	11578	10384	6573	5258	4510	355201	259058	279.72	174121	116215	119805	1.16E-06	-1151026613	down
	EEF1A1P5	ENSG00000196205	9576	8781	7528	4468	4591	3923	45376	333072	299673	206081	155287	171189	1.15E-07	-111004162	down
	PTPRE	ENSG00000132334	1182	1193	1354	507	708	663	607887	448269	713148	246136	302691	343007	1.15E-07	-1111092866	down
	FNDC10	ENSG00000228594	611	548	496	258	257	222	77316	553736	585938	306497	260574	257713	1.15E-07	-1281718255	down
	TGFB2	ENSG00000092969	4300	3298	2712	1632	1470	1782	500695	33.17	310752	187462	165889	224594	1.15E-05	-1187934673	down
	COL6A2	ENSG00000142173	19200	19568	20870	7804	9525	8298	125434	102567	126226	478418	49914	515525	1.14E-14	-1336025666	down
	SYNGR1	ENSG00000100321	3632	3460	4135	1633	1699	1573	551376	391593	442388	245188	157211	173285	1.14E-10	-1307421812	down
	MSI2	ENSG00000153944	14022	12690	14327	6425	5709	6909	114366	905052	96277	528814	55324	553648	1.14E-07	-1208882546	down
	RSU1	ENSG00000148484	2614	2436	2196	1111	1034	995	408706	300387	293509	150572	129783	135278	1.13E-09	-1312865341	down
	PLEC	ENSG00000178209	34434	37548	31831	14919	22223	17316	576054	494966	494037	255617	28046	267762	1.13E-09	-1055345404	down
	MARVELD1	ENSG00000155254	1835	2035	1617	847	773	685	144683	129856	119765	74977	48936	53504	1.12E-10	-1348486948	down
	ARPIN	ENSG00000242498	1246	1362	1464	535	537	614	630292	492504	652242	281994	205307	314133	1.12E-10	-1370734771	down
	L1CAM	ENSG00000198910	5230	5117	6467	1444	1280	1515	316762	259756	350748	99408	768182	975159	1.11E-20	-2086580623	down
	HSD17B4	ENSG00000133835	7032	6516	6765	2317	2157	2239	761303	538156	625201	284512	21051	25267	1.11E-16	-1702866762	down
	PDIA4	ENSG00000155660	11177	9530	9491	4310	3674	3754	813988	557004	654347	304943	218583	263066	1.11E-10	-1469361882	down
	ST8SIA2	ENSG00000140557	2062	2108	1607	556	692	705	155708	117073	92878	309214	409551	459219	1.10E-15	-1675765634	down
	HMGB3	ENSG00000029993	4393	4706	3081	1981	2113	1784	93608	787562	543052	367355	345943	312831	1.10E-07	-1157038226	down
	TMEM150C	ENSG00000249242	442	573	698	191	199	233	45847	417087	601086	203318	173833	197421	1.09E-09	-1553111162	down
	PPP1R14A	ENSG00000167641	86	93	91	28	30	14	302456	270812	341801	11987	100763	0.690729	1.09E-06	-2027001147	down
	ADD2	ENSG00000075340	2910	4642	2634	1408	2235	1598	167713	182298	109158	61376	993063	741392	1.09E-06	-1063504909	down
	ECT2	ENSG00000114346	9340	10283	7279	4562	4715	4942	785905	686572	554691	371899	318323	36.79	1.09E-06	-101744095	down
	MFGE8	ENSG00000140545	8215	9998	9137	3914	4630	3691	108648	106524	113791	497159	53109	479755	1.08E-15	-126867544	down
	TSPAN14	ENSG00000108219	6861	7354	6672	3034	3125	3213	58799	512836	524539	237657	228364	258021	1.08E-11	-1257614149	down
	ALDOC	ENSG00000109107	579	449	495	275	229	193	115419	696502	904923	487273	379884	362595	1.08E-05	-1242976145	down
	SHC4	ENSG00000185634	2668	3829	2180	569	1104	1024	150294	188589	117234	374047	575183	654993	1.07E-12	-1794608049	down
	CSRP1	ENSG00000159176	7086	8162	7887	3901	4908	3682	765305	702952	694268	434396	414366	339898	1.06E-09	-1005350646	down
	MACF1	ENSG00000127603	64609	62482	49949	20351	33312	31242	216403	163205	142581	936755	692747	780927	1.06E-07	-1188319981	down
	GAPDHP1	ENSG00000228232	879	894	712	420	363	311	177325	140391	139781	800655	586013	59887	1.06E-07	-128424779	down
	TMX1	ENSG00000139921	3480	3548	3524	1848	1815	1821	274294	23052	251461	143126	12038	128126	1.06E-07	-1047636408	down
	MMP24OS	ENSG00000126005	2005	1963	1720	1079	940	775	582649	477512	480406	330887	238069	227637	1.06E-06	-1129471065	down
	DNPH1	ENSG00000112667	1325	1181	1196	594	483	404	518355	357181	439414	223339	146065	149493	1.05E-08	-1428103547	down
	PPIAP22	ENSG00000198618	3300	2877	2571	1730	1474	1230	107602	710933	745339	532716	322824	33773	1.05E-05	-1089278956	down
	CLCA2	ENSG00000137975	50	43	37	2	7	10	0.610261	0.470551	0.263846	0.0200726	0.0635933	0.0695494	1.05E-05	-2904027946	down
	HMGCS1	ENSG00000112972	9971	6731	5492	3639	3078	3186	926304	515845	488543	287539	223905	27212	1.05E-05	-1282902632	down
	MAP3K5	ENSG00000197442	2510	2456	2071	759	992	958	101159	802683	790765	298756	330459	371784	1.04E-13	-1494962996	down
	GJA1	ENSG00000152661	3334	3243	3259	1049	1212	1432	302171	231503	274995	997183	889006	11954	1.04E-12	-1521334115	down
	TAGLN2	ENSG00000158710	42013	36773	34398	17633	14402	12868	604409	419644	457464	223295	154974	169304	1.04E-09	-1438972525	down
	SLC20A2	ENSG00000168575	4110	3570	4073	1519	1946	1863	395882	34.79	383024	138268	194377	206712	1.04E-09	-1266571032	down
	ALDH3A1	ENSG00000108602	2326	1437	3095	384	282	348	36367	190674	451458	708766	446779	525872	1.03E-19	-2870869971	down
	TRPV4	ENSG00000111199	184	231	275	90	103	113	140333	146831	176917	0.65648	0.620097	0.687395	1.03E-05	-1274001398	down
	FLG	ENSG00000143631	30278	27915	16398	5127	10239	7591	509231	372607	266009	834355	140146	126999	1.02E-11	-1846599678	down
	IGFBP2	ENSG00000115457	2119	1703	1278	782	536	474	490713	304959	297781	191861	111851	110463	1.02E-07	-1610427341	down
	ELOVL6	ENSG00000170522	13041	11353	9419	5784	4453	5092	890366	631258	59906	361515	275118	319874	1.02E-06	-1238441217	down
	ASIC1	ENSG00000110881	433	465	600	162	207	241	332535	277803	389387	119335	128612	163045	1.01E-07	-1405853493	down
	PLOD1	ENSG00000083444	8492	9928	9295	3932	3739	3465	678323	627203	690334	294602	231086	257721	1.00E-14	-1411673146	down
	AC003102.1	ENSG00000260793	124	114	192	51	50	50	19661	150124	247607	0.830617	0.825273	0.682123	1.00E-05	-1623673039	down
	IRAIN	ENSG00000259424	21	26	31	13	13	6	101818	0.955645	0.70091	0.224913	0.194545	0.227262	0.049964255	-1398788023	down
	BMS1P22	ENSG00000232775	8	8	10	2	1	1	0.127466	0.066833	0.039447	0	0	0	0.049705862	-2800167005	down
	AC108463.2	ENSG00000230499	27	53	38	17	13	24	26052	238604	32014	124243	0.531344	124849	0.049666634	-1184600425	down
	VWA1	ENSG00000179403	37	35	69	9	39	19	0.500771	0.379334	103845	0.159789	0.244028	0.246934	0.049303086	-1254715561	down
	LINC01615	ENSG00000223485	12	17	38	10	6	6	0.585422	0.680593	147084	0.40809	0.209312	0.159561	0.04891187	-1695102041	down
	NUDT4B	ENSG00000177144	25	277	12	9	19	14	0.487225	453644	0.188497	0.185754	0.217518	0.221244	0.048787263	-2896741841	down
	PAICSP4	ENSG00000254244	16	18	19	5	7	6	0.310719	0.366877	0.468869	0.177748	0.118902	0.105836	0.048759897	-1674588674	down
	MIR1285-1	ENSG00000221520	15	5	18	4	1	3	0	0	0	0	0	0	0.04867427	-2360391517	down
	AC073236.1	ENSG00000285524	10	12	15	3	5	0	0.306666	0.160466	0.426862	0.140039	0.0782312	0	0.048418156	-2362213942	down
	AC104532.2	ENSG00000267571	23	26	32	6	19	9	0.243988	0.640679	0.705406	0.322498	0.234414	0.389777	0.048302634	-1408831152	down
	RPL7P32	ENSG00000231006	105	58	65	63	14	20	373756	154503	210556	20668	0.3926	0.531219	0.047424088	-1308696254	down
	HADHAP2	ENSG00000255967	37	24	23	9	11	15	0.477304	0.267323	0.221852	0.109586	0.121775	0.180916	0.047373827	-1390195915	down
	OBSCN-AS1	ENSG00000162913	25	21	58	7	8	23	0.441396	0.277807	115119	0.208356	0.226375	0.542892	0.047260689	-1550756972	down
	ACPP	ENSG00000014257	6	3	23	1	3	1	0.102761	0.0112697	0.463001	0.0926405	0.0992028	0.0237105	0.047198089	-2860218706	down
	MIR6835	ENSG00000276404	30	24	17	11	8	8	0	0	0	0	0	0	0.046946002	-1503165576	down
	AC037459.2	ENSG00000251034	31	30	53	22	13	16	0.248092	0.171161	0.433199	0.178692	0.107322	0.147338	0.046272132	-1252764685	down
	SAA1	ENSG00000173432	38	95	40	19	23	39	22688	396631	20129	102815	0.868533	170969	0.045991049	-1141534388	down
	AC093535.1	ENSG00000250602	25	26	24	8	12	11	0.289604	0.100929	0.140569	0.123302	0.403773	0.16841	0.044950161	-1393865155	down
	RF00019	ENSG00000201354	23	11	16	6	6	3	0	0	0	0	175543	0	0.044563591	-188995416	down
	HMGA1P3	ENSG00000258011	32	72	14	20	9	13	378609	566903	173626	238462	103331	168817	0.044537498	-1506746142	down
	TMEM89	ENSG00000183396	11	6	10	3	0	0	0.0855012	0.266289	0.158377	0.155232	0	0	0.043902812	-3253980757	down
	AP000759.1	ENSG00000255320	49	40	42	20	32	16	148054	0.704526	102276	0.165182	0.84918	0.830661	0.043865223	-1093849754	down
	AC009902.2	ENSG00000254027	26	39	22	6	17	13	102823	146712	0.951884	0.474502	0.715287	0.663473	0.042851251	-1392012654	down
	AL359091.5	ENSG00000273186	33	42	43	28	14	7	140677	228052	340295	235774	134489	0.315943	0.042551908	-134570704	down
	BOLA2P2	ENSG00000271161	29	14	5	1	4	6	252754	0.492687	0.521296	0.420123	0.326663	0.435011	0.04247648	-2288314772	down
	HSP90AA6P	ENSG00000181359	22	39	18	5	16	9	0.893435	12205	0.620988	0.203154	0.512778	0.337171	0.042016788	-1517864785	down
	AC096537.1	ENSG00000233384	46	79	37	20	43	20	155503	216841	10614	0.446055	100207	0.370413	0.041801669	-1085092266	down
	LINC00391	ENSG00000238230	21	29	41	7	20	11	0.100508	0.158743	0.163458	0.115272	0.153851	0.0685447	0.040947079	-1404414027	down
	FABP7	ENSG00000164434	9051	4120	3879	2787	1235	1770	207773	753232	818093	602602	225718	362141	0.040789938	-1665200822	down
	RN7SL689P	ENSG00000263432	25	13	25	5	10	7	194659	120321	118746	0.852787	0.99133	0.288443	0.040689779	-1682142864	down
	BAG6	ENSG00000204463	13	14	125	19	18	10	0.509147	0.641923	502376	101767	0.694888	0.331967	0.04051689	-1823090349	down
	CSDC2	ENSG00000172346	30	45	91	18	39	22	0.354956	0.344745	0.825086	0.192753	0.523338	0.278951	0.039584678	-1213572388	down
	SEPT10P1	ENSG00000253541	26	28	49	7	14	21	0.636046	0.600295	106293	0.271506	0.29207	0.539058	0.039390338	-1409607542	down
	AL512353.3	ENSG00000237090	10	10	20	3	2	4	0.25471	0.171952	0.304144	0.033319	0.055697	0.0661144	0.039378211	-2249436094	down
	AL049872.1	ENSG00000259020	49	37	50	27	23	18	0	0.409779	0.251123	0	0	0	0.039360182	-1119729993	down
	RPL21P75	ENSG00000213860	53	48	79	28	46	24	882471	609565	237636	737869	627186	37553	0.038491696	-1024334901	down
	GAPDHP65	ENSG00000235587	49	54	45	26	16	30	110696	1343	126073	0.643442	0.500596	0.730573	0.037924574	-1116212836	down
	AP000553.7	ENSG00000284654	27	31	15	9	10	8	0	0	0	0	0	101259	0.037906881	-1539718751	down
	NMUR2	ENSG00000132911	27	43	7	7	10	7	0.397859	0.471619	0.123267	0.101455	0.135338	0.0804141	0.037882934	-1771159648	down
	APCDD1	ENSG00000154856	258	94	243	133	80	109	603576	185381	363572	244907	0.848194	176797	0.037764961	-1010967899	down
	FGFBP3	ENSG00000174721	1135	307	681	303	100	171	149262	358306	865859	396521	111153	211091	0.037259176	-2000661038	down
	CAPNS2	ENSG00000256812	13	13	22	2	9	1	0.397771	0.390387	0.507575	0.0908432	0.304418	0.0451232	0.036882437	-2195347501	down
	AP000553.5	ENSG00000284630	28	23	23	13	8	6	0.307807	0.547535	113016	0.661997	0.261134	0.452014	0.036598131	-1560262729	down
	GDNF-AS1	ENSG00000248587	29	52	39	9	29	17	0.425595	0.596782	0.950178	0.0457305	0.261958	0.271721	0.036390973	-1253779941	down
	RN7SKP275	ENSG00000201496	23	13	18	5	9	2	0.945587	0	230816	0.276444	0	0	0.036321869	-193399095	down
	ANKRD55	ENSG00000164512	44	31	29	18	17	11	0.289065	0.0844241	0.173932	0.171596	0.0981012	0.140675	0.036245592	-1306504894	down
	RDH10-AS1	ENSG00000250295	26	13	24	7	10	4	0.187776	0.222974	0.311785	0.219987	0.180051	0.0805867	0.036230541	-1752021429	down
	RBMXP2	ENSG00000215210	119	81	54	59	42	31	261318	14918	121308	123376	0.741913	0.688922	0.036201626	-1061516636	down
	PITRM1-AS1	ENSG00000237399	43	54	69	19	44	25	0.565778	0.388909	0.57837	0.223459	0.319126	0.217074	0.036105047	-1057803461	down
	AC073413.1	ENSG00000270480	55	64	29	23	34	14	179641	128533	0.832386	0.612674	0.744633	0.610129	0.035942423	-1187596206	down
	PALM2	ENSG00000243444	32	87	48	9	45	20	0.807951	120761	107534	0.407853	0.598161	0.65238	0.035675137	-130470881	down
	COX5BP6	ENSG00000237082	24	25	14	11	3	4	0	0	0	0.664137	0.598668	0	0.035654936	-1870651512	down
	FAM66B	ENSG00000215374	17	33	37	10	11	13	0.310954	0.3497	0.512888	0.122147	0.102038	0.181727	0.035388565	-1440050782	down
	CHRNA9	ENSG00000174343	83	142	207	20	122	76	126618	233157	342974	0.201762	165987	10588	0.035178038	-1149053601	down
	SMIM11A	ENSG00000205670	139	55	64	59	29	33	295127	104119	128366	102323	0.44016	0.723861	0.034706281	-1216194191	down
	EDIL3	ENSG00000164176	19	40	64	13	21	18	0.317557	0.582929	0.4893	0.0546058	0.123692	0.305111	0.034686777	-1348834619	down
	GASAL1	ENSG00000253669	50	79	122	29	60	47	128723	157558	164757	0.732648	0.986543	102321	0.0345015	-1009315643	down
	AC062015.1	ENSG00000235070	33	73	59	25	22	33	0.698157	164681	133678	0.718277	0.400737	0.831993	0.034413593	-1105088799	down
	IGLV5-52	ENSG00000211643	80	98	53	39	64	22	441814	426716	258749	19669	276406	0.90025	0.034361762	-102217363	down
	HSP90AB2P	ENSG00000205940	52	74	28	27	23	22	0.50324	0.596697	0.451503	0.274011	0.228352	0.209806	0.033732954	-1174398262	down
	AC025423.1	ENSG00000256325	7	15	24	6	1	2	0	0	0	0	0	0	0.033308596	-2396590182	down
	AC009518.1	ENSG00000224865	13	25	24	2	13	3	0.108144	0.208799	0.224305	0	0.113147	0.133762	0.033205164	-1950420531	down
	AC090587.2	ENSG00000229368	45	27	24	10	13	16	282813	182131	141634	0.638197	0.811542	0.957297	0.032624769	-1434863289	down
	AC090739.1	ENSG00000254165	46	52	81	21	23	42	203294	152458	282542	0.923913	0.718019	148678	0.032396151	-1151670317	down
	SEPT5-GP1BB	ENSG00000284874	18	15	29	2	10	7	651762	490641	617941	471838	338627	351348	0.032365453	-1870819279	down
	CA9	ENSG00000107159	17	21	40	9	11	8	0.663163	0.569434	102381	0.37657	0.120872	0.144536	0.031999698	-159677259	down
	AL022326.2	ENSG00000280216	13	27	23	4	11	5	0.712298	176512	229699	0.477367	0.953285	0.639747	0.031864529	-177869444	down
	AL365356.5	ENSG00000242147	15	24	2	1	0	4	0.798221	0.684558	0.147904	0	0	0.216799	0.03169296	-3055036474	down
	RBM15-AS1	ENSG00000227963	28	25	19	10	6	9	0.0935183	0.0451967	0.0688722	0.0158324	0.0134582	0.0524151	0.031426092	-1619308163	down
	GLI2	ENSG00000074047	35	91	55	32	25	30	0.14661	0.416209	0.480832	0.123228	0.0786853	0.235356	0.031315774	-1105965786	down
	GAS6	ENSG00000183087	20415	12418	11407	8106	3382	4057	220157	105.56	115474	764131	278153	396242	0.031310669	-1598563926	down
	AC027627.1	ENSG00000249084	22	19	11	8	3	1	0.432924	0.225419	0.267507	0.262615	0.0552164	0.065364	0.030577264	-2205609652	down
	IL1B	ENSG00000125538	52	131	218	29	65	91	119866	199605	341437	0.71789	0.911454	141191	0.030065202	-1209913983	down
	AC117422.1	ENSG00000248607	49	29	31	6	13	23	0.200871	0	0.739284	0.178942	0.153559	0.18005	0.029901255	-1511430098	down
	ADH4	ENSG00000198099	125	50	18	27	16	28	199462	0.926194	0.299723	0.404636	0.350758	0.465925	0.029867502	-1574124442	down
	PFN1P6	ENSG00000227212	28	23	20	5	4	13	514269	346207	337516	152614	19987	0.921059	0.029173801	-1782318639	down
	MYL1	ENSG00000168530	20	44	25	10	12	12	0.76976	117668	0.902307	0.21558	0.32192	0.381432	0.029017518	-1462547778	down
	AC020951.1	ENSG00000278897	126	89	105	13	63	77	144145	0.823115	119107	0.183855	0.674212	0.892385	0.028836231	-1221260987	down
	PCDHB11	ENSG00000197479	20	30	19	7	10	7	0.17752	0.190324	0.175331	0.128173	0.160447	0.148366	0.028784011	-1627739447	down
	SNHG28	ENSG00000256029	24	17	31	2	11	10	124299	106741	128915	0.40362	0.42587	0.503739	0.028007273	-180939581	down
	AP001626.1	ENSG00000235023	57	34	51	12	22	30	0.470143	0.272874	0.393432	0.115224	0.191915	0.213914	0.028007273	-1289704436	down
	SNORA13	ENSG00000238363	20	14	17	2	2	8	0	35497	0	0	0	0	0.027776836	-219033551	down
	FAM95B1	ENSG00000223839	90	158	50	50	66	39	0.586522	0.715399	0.353754	0.300805	0.277668	0.316575	0.027403177	-1032979019	down
	AL359918.1	ENSG00000228818	41	26	22	10	11	13	0.313412	0.156632	0.245441	0.121261	0.0505203	0.0750468	0.027102602	-151762043	down
	TMSB4XP1	ENSG00000236876	71	42	74	44	22	17	165473	555333	157668	91039	446489	346464	0.0268964	-1279856774	down
	PIGUP1	ENSG00000224437	36	46	26	20	14	10	175801	203432	15085	124515	0.768602	0.679621	0.026872638	-1380552512	down
	AC007362.1	ENSG00000225216	35	23	61	4	3	26	0.814953	0.673734	214899	0.20397	0	105861	0.026426879	-1931778189	down
	RNU7-75P	ENSG00000251880	5	15	11	0	3	0	0	0	0	0	0	0	0.025806934	-3523049295	down
	AC087301.1	ENSG00000265010	15	10	10	3	0	2	0.551154	0	0	0.242867	0	0	0.025336626	-2886472856	down
	OPRL1	ENSG00000125510	32	86	23	8	25	20	0.240993	0.470294	0.166238	0.064944	0.194124	0.100273	0.025311804	-1494384085	down
	FKBP4P1	ENSG00000251463	26	13	33	9	9	5	0.607543	0.197062	0.497881	0.196369	0.109407	0.162345	0.025265068	-1794164948	down
	BX470102.2	ENSG00000285867	52	69	49	31	31	27	0.377803	0.421006	0.364332	0.205823	0.235617	0.22923	0.025039338	-1028765788	down
	ARR3	ENSG00000120500	51	44	70	30	23	27	0.0374312	0.029464	0.102654	0	0.0286353	0.296492	0.024492036	-1148953252	down
	AC009275.1	ENSG00000273297	39	28	44	17	18	13	163645	0.968726	117574	0.805179	0.418792	0.734049	0.024451144	-1341163503	down
	AC010761.4	ENSG00000265474	17	17	15	3	3	6	353022	36406	172716	180495	0.775559	0.6811	0.024230773	-2128162767	down
	NNMT	ENSG00000166741	5043	4407	10344	2543	1907	3350	144603	106.41	285043	745521	464956	907163	0.02418699	-1434395619	down
	AC015845.2	ENSG00000265542	48	47	50	23	30	20	165154	126302	190112	0.113196	0.745868	0.376473	0.023946359	-1116027664	down
	KYNU	ENSG00000115919	146	371	337	46	244	149	240647	48163	510093	0.520964	307248	268075	0.023069687	-1098898468	down
	LINC01411	ENSG00000249306	25	46	52	17	7	21	0.610944	0.60091	0.814829	0.660054	0.125406	0.33233	0.022530417	-1495976755	down
	TXNP6	ENSG00000234036	87	118	110	81	36	42	103642	105929	895232	728807	203645	342665	0.022108286	-1044497915	down
	GPR150	ENSG00000178015	25	59	60	17	29	18	0.399539	0.596385	0.866509	0.244515	0.322785	0.242259	0.021841551	-1274388402	down
	AC090198.1	ENSG00000253106	70	69	38	23	35	30	0.580577	0.458572	0.377734	0.30252	0.34003	0.2996	0.021603529	-1130207728	down
	TMEM178A	ENSG00000152154	210	134	167	119	44	92	476073	211555	390375	208011	0.881121	163417	0.021528788	-1083861921	down
	RHEBP1	ENSG00000229927	19	35	3	1	4	5	102397	723017	445894	627837	622329	592847	0.021528788	-2589289483	down
	AC069360.1	ENSG00000250041	9	23	16	2	3	5	0.592	0.622429	0.646814	0.288698	0.166372	0.341271	0.020819773	-2330285311	down
	KIAA1755	ENSG00000149633	17	18	32	6	11	1	0.167472	0.116862	0.278283	0.0593288	0.0558303	0	0.020789356	-2061473169	down
	THBS2	ENSG00000186340	91	226	202	35	122	109	0.636212	0.80437	0.94002	0.233656	0.521984	0.443636	0.020680696	-1073488375	down
	AC022400.1	ENSG00000224195	22	10	27	6	1	6	156242	147078	0.597151	102048	0	0.712026	0.02028305	-2275052816	down
	AC104453.1	ENSG00000285922	16	44	33	8	14	11	0.182429	0.308639	0.12109	0.0956302	0.139624	0.118479	0.020084748	-1581906168	down
	NCAM1-AS1	ENSG00000227487	20	25	25	5	11	7	0.434918	0.299372	0.335018	0.126797	0.26844	0.222115	0.019788782	-1735779093	down
	RPEL1	ENSG00000235376	27	55	18	8	15	12	0.364828	0.61063	0.259321	0.118219	0.180678	0.195199	0.019350433	-1600873602	down
	AL928921.2	ENSG00000284693	29	23	31	12	8	9	0.407294	0.248927	0.474859	0.170062	0.0708518	0.167023	0.019330717	-162385529	down
	BEAN1	ENSG00000166546	80	76	159	52	45	63	227273	22452	282323	103208	0.904399	170702	0.01928757	-1078347485	down
	LINC01812	ENSG00000237013	15	24	12	6	3	2	0.530562	0.828072	0.421421	0.206766	0.0580018	0	0.019060211	-2280119931	down
	DOCK2	ENSG00000134516	107	100	56	42	58	43	131692	139995	0.973302	0.422539	0.373186	0.315234	0.018810446	-1005164605	down
	AC007673.1	ENSG00000267311	9	16	41	0	3	9	0.0904604	0.391046	0.545814	0	0.0692313	0.041062	0.018802767	-2556146335	down
	AC000120.1	ENSG00000243107	33	46	29	10	14	19	0.657274	0.648374	0.587516	0.212086	0.280592	0.394944	0.018802767	-1420182111	down
	DCC	ENSG00000187323	96	103	52	47	47	38	0.323018	0.286344	0.326888	0.309704	0.169399	0.308216	0.018714625	-1030840016	down
	AC108463.3	ENSG00000271590	42	50	49	19	26	23	0.89769	0.733023	0.833924	0.2938	0.368062	0.378786	0.018651352	-1164585002	down
	AC104779.1	ENSG00000249304	50	43	41	21	9	23	108623	0.594574	0.858946	0.139178	0.118701	0.279274	0.018600608	-1415540448	down
	GAPDHP40	ENSG00000248626	109	66	92	54	37	46	216363	12245	168097	124092	0.731641	109586	0.018344597	-1076262252	down
	FCGR2A	ENSG00000143226	27	27	57	17	12	12	110904	0.751283	206265	0.459515	168574	0.553561	0.018258009	-1538941866	down
	AC092675.1	ENSG00000222000	70	96	48	35	44	32	334398	329159	148972	150998	150571	107972	0.017589627	-1048579915	down
	MIR3153	ENSG00000265112	47	59	38	22	17	25	0	0	0	0	0	0	0.017514766	-124958597	down
	ADAMTS9-AS1	ENSG00000241158	71	73	54	37	25	35	110862	0.834084	0.771606	0.326966	0.40975	0.346127	0.016944933	-1115121546	down
	PCDHB3	ENSG00000113205	29	45	26	16	14	5	0.913231	0.343015	0.201217	0.18214	0.10108	0.0613463	0.016656524	-1607185262	down
	TGM2	ENSG00000198959	107	391	125	59	158	82	0.717636	215012	0.796427	0.553158	0.959774	0.520212	0.016646719	-1145765746	down
	PCDHB8	ENSG00000120322	122	108	119	47	48	90	129296	101021	131434	0.46624	0.438437	0.893562	0.016290859	-1013934382	down
	AF230666.1	ENSG00000223697	19	27	42	5	12	12	0.871946	0.586347	13202	0.482296	136792	136582	0.016081638	-1722647017	down
	MAP3K14-AS1	ENSG00000267278	73	56	109	28	50	43	334535	235752	377234	0.603457	185755	250236	0.016000222	-1120309578	down
	AL513548.4	ENSG00000285571	33	32	31	12	12	13	0.534712	0.350279	0.537739	0.122229	0.170511	0.0809103	0.015997281	-1484095797	down
	PHF1	ENSG00000112511	140	595	261	183	201	117	118654	796648	321515	157246	0.966707	0.732192	0.015721669	-1035409402	down
	GCSHP5	ENSG00000224837	175	79	67	56	49	48	991934	406223	375613	29118	246888	269641	0.015332031	-1213388437	down
	SARDH	ENSG00000123453	15	36	25	5	11	7	0.172194	0.422159	0.272007	0	0.112659	0.137197	0.015198838	-1824662215	down
	AL591848.4	ENSG00000260855	58	73	85	14	56	33	0.45858	0.46409	0.580467	0.140564	0.311995	0.208702	0.01491993	-1225212352	down
	PCDHB12	ENSG00000120328	37	64	47	8	26	27	0.403154	0.392835	0.42134	0.121534	0.217756	0.362423	0.01487893	-1387275673	down
	C3orf67	ENSG00000163689	28	44	17	7	15	7	0.22001	0.304568	0.206725	0.0452591	0.171933	0.0812936	0.014810681	-1735906086	down
	AC122129.1	ENSG00000197815	159	118	86	33	77	79	222467	151429	0.974286	0.49264	0.861099	102301	0.014635413	-1088748301	down
	CYP51A1P1	ENSG00000241095	43	44	18	14	10	12	0.817982	0.570573	0.379948	0.201833	0.120393	0.228744	0.014344573	-1633759368	down
	AL928654.2	ENSG00000257270	97	83	68	36	59	41	275896	154252	139894	983656	203362	212463	0.014081311	-1006021209	down
	AL451064.2	ENSG00000279659	65	64	83	26	50	35	113377	0.939392	136948	0.54582	0.629113	0.669943	0.013742656	-1073184227	down
	CNGB1	ENSG00000070729	16	13	31	6	4	4	0.348134	0.153559	0.433437	0.171849	0.0230645	0.143621	0.013403018	-2211349786	down
	AP004245.1	ENSG00000238041	22	40	22	10	9	8	0	0	0.4056	0	0	0	0.013264711	-1713392719	down
	AL049552.1	ENSG00000234084	57	109	54	35	30	39	0.413442	0.961739	0.286899	0.187069	0.158196	0.373605	0.013246937	-1140585474	down
	TMEM37	ENSG00000171227	27	29	51	16	9	12	0.554189	0.627187	0.798163	0.330357	0.259627	0.366367	0.013185162	-1620406851	down
	RNA5SP283	ENSG00000202474	86	68	86	33	50	46	122159	0	0	0	920321	955339	0.013157424	-1029717299	down
	AC013448.1	ENSG00000231189	18	16	8	0	4	2	0.131866	0.206284	0.122265	0	0	0.0597582	0.012921478	-2978167519	down
	PRSS53	ENSG00000151006	62	86	44	20	34	36	0.967266	101299	0.743791	0.337347	0.942989	0.700516	0.012661943	-1193618874	down
	OR5B19P	ENSG00000255431	21	40	25	8	14	6	0.665932	0.783218	0.720774	0.253218	0.382226	0.201356	0.012585994	-1728495358	down
	DLEU1	ENSG00000176124	84	96	60	35	44	47	10419	632833	587878	581984	433995	512391	0.012345233	-1033087793	down
	RPL5P1	ENSG00000241061	37	19	23	7	6	10	0.813411	0.637391	0.754515	0.317993	0.222363	0.368845	0.011937345	-190831395	down
	RAC2	ENSG00000128340	29	31	48	10	10	18	0.785763	0.744667	0.807135	0.263756	0.193555	0.407066	0.011934607	-1604451449	down
	AL023775.1	ENSG00000235008	42	47	45	13	27	19	0.6673	0.547793	0.471239	0.195856	0.285981	0.315458	0.011914479	-1315802062	down
	RN7SKP296	ENSG00000223117	34	12	68	8	11	14	146667	0.73559	381609	0.648849	112107	17473	0.011815095	-1937107271	down
	CDH10	ENSG00000040731	253	221	150	133	65	120	201723	180858	140535	0.999501	0.579037	0.87884	0.011687185	-1046103391	down
	SMAD6	ENSG00000137834	216	162	116	117	78	60	204072	0.936638	0.733865	102083	10314	0.396593	0.011520488	-1061615003	down
	SPAAR	ENSG00000235387	45	54	62	32	20	17	0.892197	0.775979	0.941275	0.510046	0.314235	0.278711	0.011520488	-1309582059	down
	AL354897.1	ENSG00000285556	27	103	37	7	30	19	0.377503	152281	0.700504	0.147686	0.330175	0.440326	0.010873749	-1665004733	down
	KCNMB2	ENSG00000197584	103	79	46	38	31	35	397053	40074	31531	291448	122509	206268	0.010825564	-124213308	down
	PCLAF	ENSG00000166803	343	323	200	194	73	150	557431	479993	446217	472055	232506	322251	0.010292094	-1111630665	down
	DSTNP1	ENSG00000230982	44	57	36	16	24	19	114064	208183	144793	0.768917	109076	0.513737	0.010230474	-1325435073	down
	HRH1	ENSG00000196639	96	229	249	38	154	85	0.641373	168767	189976	0.254321	0.864593	0.883717	0.010195301	-1193075701	down
	LINC00589	ENSG00000251191	68	104	124	28	55	64	0.908658	146075	163984	0.463253	0.58907	0.693483	0.010164315	-1116657838	down
	CLEC19A	ENSG00000261210	10	32	30	2	11	3	0.190241	0.300898	0.336027	0.0174738	0.131046	0.0932541	0.009999123	-2309335326	down
	SPINK2	ENSG00000128040	40	53	32	9	25	15	219394	199587	187123	0.503181	121321	0.683414	0.009999123	-1484045698	down
	MIR621	ENSG00000207652	110	93	37	24	30	45	0	0	515262	0	0	0	0.009956991	-1386865083	down
	AL590652.1	ENSG00000227885	64	95	70	36	41	42	116963	132611	156849	0.646841	0.360165	0.841093	0.009562686	-1035615482	down
	LINC00324	ENSG00000178977	64	60	77	25	46	29	0.857971	0.660652	0.940606	0.343329	0.505128	0.400181	0.009416128	-1149961402	down
	AL031846.2	ENSG00000279833	43	66	75	18	42	24	0.459602	0.514806	0.760338	0.151317	0.350079	0.236674	0.009051341	-1264203159	down
	MLPH	ENSG00000115648	21	46	22	2	13	9	0.287774	102746	0.671441	0.0604765	0.342958	0.106194	0.008982406	-2004845874	down
	RPL7AP50	ENSG00000213609	58	67	24	24	17	12	121148	152618	0.561593	0.612937	0.515062	0.304973	0.008975299	-1578000067	down
	ATP1B3-AS1	ENSG00000244124	31	34	42	12	12	15	0.20386	0	0.187448	0	0.311521	0.182594	0.00892115	-1558647452	down
	AC093535.2	ENSG00000279118	54	46	50	28	14	17	0.799892	0.509102	0.608989	0.447957	0.134389	0.283969	0.008912382	-1436546285	down
	SERTM1	ENSG00000180440	40	63	32	24	15	8	0.373946	0.471554	0.283341	0.203727	0.127207	0.0882361	0.008875499	-1593064372	down
	PCDHGA6	ENSG00000253731	63	64	91	39	42	25	0.507124	0.432475	0.772009	0.261893	0.251622	0.257377	0.008859922	-1162194161	down
	KIAA1549L	ENSG00000110427	70	153	92	33	81	44	0.291064	0.603174	0.287996	0.0809546	0.247711	0.113193	0.008580036	-1109815246	down
	AC108472.1	ENSG00000235902	60	25	19	9	16	5	380129	0.996943	130389	0.680931	0.862236	0.509497	0.008459724	-1991742409	down
	LINC01711	ENSG00000268941	36	77	40	19	29	13	100279	173918	107738	0.819201	0.727048	0.335201	0.00830115	-1424542371	down
	RPL23AP65	ENSG00000243964	37	35	26	14	7	10	197605	195307	156381	114206	0.539905	0.635791	0.008266341	-1746392812	down
	AC069499.2	ENSG00000276763	26	33	6	1	2	7	158415	135321	0.72916	0.176387	0.302834	0.710297	0.008126635	-2771424354	down
	AC121761.2	ENSG00000273987	34	34	50	16	14	14	137789	0.947609	142665	0.441812	0.68227	0.586986	0.008049678	-153047486	down
	AL512791.1	ENSG00000258424	26	37	42	15	9	11	0.952383	117868	0.872572	0.278357	0.242666	0.282174	0.0079546	-1663295639	down
	LAMC1-AS1	ENSG00000224468	40	52	41	12	28	14	0.272258	0.209574	0.12572	0.36747	0	0.122688	0.007850077	-1436890698	down
	AC064875.1	ENSG00000225649	240	160	122	75	135	76	462253	209968	163914	133495	176944	103575	0.007837236	-1034848831	down
	AC104563.1	ENSG00000240036	111	156	76	50	85	46	118151	123597	731058	489507	700923	43824	0.007773405	-1041408296	down
	AC099677.1	ENSG00000230953	61	59	92	14	30	44	301676	406288	667372	124284	0	128576	0.007762812	-1389111489	down
	SSPO	ENSG00000197558	27	27	81	12	12	18	0.14639	0.175652	0.333562	0.0955814	0.123056	0.111295	0.007744993	-1791896375	down
	AP002807.1	ENSG00000255031	45	41	73	20	26	21	3989	211156	348697	381624	104009	146016	0.007639871	-1374944355	down
	AC087385.1	ENSG00000240163	19	28	48	11	9	8	0.87657	196104	401581	128471	0.893431	0.780461	0.007639871	-1858775796	down
	AC117402.1	ENSG00000206532	25	99	33	9	26	15	0.77659	225639	101577	0.173828	0.441909	0.469285	0.007520827	-172980484	down
	CD44-AS1	ENSG00000255443	35	34	51	9	17	18	0.403548	0.234803	0.280101	0.0913624	0.15475	0.273829	0.007448636	-1574962243	down
	HMGA1P2	ENSG00000248641	34	69	47	18	17	24	513827	749144	595291	238462	206667	289404	0.007340986	-1411902213	down
	ZBTB42	ENSG00000179627	385	330	652	266	174	282	281571	192775	405198	175843	0.940151	185642	0.007240423	-1010167767	down
	CD302	ENSG00000241399	135	75	113	59	33	54	581855	335179	541234	293323	176211	292901	0.007233304	-1251975994	down
	GCHFR	ENSG00000137880	154	140	116	96	58	54	199058	876751	829604	791224	401647	400504	0.007107001	-1070352779	down
	CYP51A1P2	ENSG00000233588	87	66	79	35	44	38	158251	0.998229	129371	0.667136	0.581365	0.54653	0.007096689	-1119019088	down
	KIAA0319	ENSG00000137261	179	112	140	83	69	77	0.68744	0.36277	0.558475	0.345361	0.227803	0.223466	0.006963841	-1033108437	down
	AL590004.3	ENSG00000260604	157	339	433	99	236	157	0.628787	106053	146527	0.415891	0.691546	0.539274	0.006946044	-104194801	down
	EFEMP1	ENSG00000115380	12906	5262	5517	2748	1451	1951	139856	469767	576959	291891	136225	216342	0.006861272	-2066819318	down
	ZBTB8B	ENSG00000273274	311	212	160	103	114	150	0.790663	0.50324	0.410165	0.25099	0.238963	0.383405	0.006801012	-1018688502	down
	AC092683.1	ENSG00000230606	43	25	34	12	10	11	0.452993	0.254351	0.70549	0.175523	0.198337	0.118456	0.006533762	-1755423677	down
	RPSAP8	ENSG00000230592	77	32	25	13	22	4	25157	0.870964	0.705477	0.426899	0.626822	0.212228	0.006453073	-1988146264	down
	VCAN-AS1	ENSG00000249835	30	25	11	3	0	7	0	0	0	0	0	0	0.006368973	-278444124	down
	AC025419.1	ENSG00000250748	33	110	53	7	39	20	0.659226	198487	145956	0.235359	0.87985	0.224221	0.006275415	-1685000638	down
	MIR2117HG	ENSG00000267151	12	26	22	0	7	3	0.751192	144888	104126	0.112866	0.383159	0	0.006192286	-2731155197	down
	GABBR2	ENSG00000136928	374	433	192	102	286	148	16022	154765	0.710398	0.420348	0.982737	0.875279	0.006095907	-1053431885	down
	FBXL8	ENSG00000135722	55	46	113	14	42	28	256424	241314	547424	0.969524	127609	168238	0.005961318	-1515405752	down
	RPL7AP66	ENSG00000175886	190	222	34	72	38	39	626648	599544	111255	212512	0.969314	114794	0.005874745	-1640789775	down
	AC026356.2	ENSG00000276115	72	26	38	19	16	8	0.905411	0.28595	0.504829	0.308515	0.21779	0.117607	0.005841376	-1822821984	down
	TRIL	ENSG00000255690	248	179	406	173	132	123	147415	0.943466	226264	0.974713	0.66637	0.682219	0.005750186	-1074320852	down
	BBOX1	ENSG00000129151	27	31	49	10	17	8	0.502801	0.488665	0.875628	0.12669	0.303195	0.147683	0.00560875	-1750713865	down
	MOAP1	ENSG00000165943	65	72	263	48	30	60	0.61121	0.527372	223194	0.476383	0.204714	0.505519	0.005597505	-1617778732	down
	AC026877.1	ENSG00000240809	136	145	94	59	56	79	250822	216362	179456	111782	0.881999	147835	0.00558841	-1042229462	down
	AC244197.3	ENSG00000241489	72	57	93	20	39	40	113855	980349	114179	233536	190315	936283	0.005431345	-1304016663	down
	NECTIN4	ENSG00000143217	87	128	370	72	93	79	145692	143387	430606	0.838983	0.84532	119629	0.005337874	-1379997293	down
	AC020916.1	ENSG00000267519	651	804	1732	571	480	604	101221	0.99099	230493	0.901919	0.621819	0.837274	0.005203128	-1036079884	down
	SHISA3	ENSG00000178343	80	106	71	39	56	37	107434	131004	0.933384	0.557321	0.643512	0.4248	0.00502206	-107408572	down
	SNCG	ENSG00000173267	90	94	106	60	43	40	37281	303187	425769	196738	123002	155544	0.004860722	-1115313821	down
	CLYBL	ENSG00000125246	217	89	201	87	32	77	579565	19728	47545	229048	0.610186	187437	0.004566482	-1469830575	down
	AC008147.2	ENSG00000257298	54	51	73	20	25	30	0.379602	0.256918	0.430654	0.127783	0.148817	0.185451	0.004563119	-1361997877	down
	AL137003.1	ENSG00000229931	88	159	169	68	97	57	32131	358821	46088	213335	269992	180034	0.00455728	-1015454642	down
	AC053513.1	ENSG00000256973	44	35	27	12	9	12	111089	0.867263	0.754993	0.269462	0.283372	0.335402	0.004511196	-1790256426	down
	LINC02031	ENSG00000238837	40	18	42	2	2	15	0.797488	0.309446	0.553514	0.0902676	0.0762791	0.180215	0.004442073	-2503534733	down
	LINC02511	ENSG00000248869	31	22	57	10	16	5	0.475663	0.474537	0.882061	0.102999	0.107454	0.0255267	0.004341717	-1991170827	down
	AL157838.1	ENSG00000197670	61	50	119	18	34	38	0.380001	0.346224	0.744487	0.167228	0.263538	0.247146	0.004307412	-1489670854	down
	ANKUB1	ENSG00000206199	205	202	387	106	90	178	31159	276402	410976	201197	111608	238713	0.004275943	-11748329	down
	TPRG1	ENSG00000188001	60	66	59	32	31	14	193335	157452	207655	0.821393	0.464112	0.652264	0.004234519	-1379321354	down
	HMGA1P8	ENSG00000233155	22	30	20	5	9	2	468503	659609	379056	170017	189525	1.72	0.004196804	-2301986696	down
	SYCE1L	ENSG00000205078	113	94	128	68	50	47	408709	202221	418142	253344	196757	114451	0.004129364	-1128196992	down
	AL033384.1	ENSG00000236740	22	28	20	6	5	5	0.172033	0.448848	0.17995	0.161036	0.0329181	0.0898865	0.004129364	-2222382113	down
	ELN	ENSG00000049540	159	108	153	67	70	82	164304	10483	188748	10169	0.706116	0.87222	0.00398846	-1063278292	down
	AL354719.2	ENSG00000236345	125	261	136	51	118	95	206387	351202	228233	0.840465	155449	154805	0.003903251	-1082233728	down
	AC010186.3	ENSG00000257027	73	91	96	49	37	38	0.73762	0.711559	0.919923	0.545413	0.344244	0.52379	0.003826483	-1156615714	down
	LRRC4	ENSG00000128594	257	237	128	104	131	102	244491	129358	0.886363	0.858726	111689	0.803314	0.003790561	-100720645	down
	LDHAP7	ENSG00000235847	36	41	32	8	15	13	111114	0.871751	0.83461	0.241542	0.364438	0.336041	0.003634248	-1718999289	down
	LINC01943	ENSG00000280721	89	73	114	46	53	33	120137	238048	17102	224343	344705	155204	0.003612321	-1197340567	down
	PTMAP2	ENSG00000197744	75	69	47	33	16	22	637137	457541	316605	327929	10144	213145	0.003595497	-1509207204	down
	SFN	ENSG00000175793	211	142	154	82	126	66	42795	244859	32611	164109	209953	139563	0.003560584	-1048024867	down
	FAM13A-AS1	ENSG00000248019	157	134	109	60	93	65	272848	24336	143257	10464	116887	0.985992	0.003398415	-1014079819	down
	DUSP13	ENSG00000079393	9	18	30	2	4	2	0.393213	0.276421	0.660899	0.0743413	0.0938625	0.175699	0.00338513	-2953345713	down
	LUM	ENSG00000139329	85	124	144	39	60	73	203697	162697	236864	0.556954	0.827762	176999	0.003267742	-1137932605	down
	AC114912.1	ENSG00000249645	28	51	27	12	13	4	0.895061	0.952409	0.62081	0.303288	0.256822	0	0.003256313	-1964638873	down
	PLPPR5	ENSG00000117598	234	166	194	65	94	139	229172	158549	162945	0.550288	0.76033	109456	0.003236822	-111995354	down
	AC004158.1	ENSG00000260664	108	121	130	41	52	81	121213	107499	155317	0.478503	0.576395	0.99145	0.003222003	-1143151038	down
	AL138689.2	ENSG00000284966	168	121	124	33	39	95	337392	173168	254407	0.727389	0.557863	10899	0.003060909	-1410705714	down
	AC093110.1	ENSG00000238018	72	64	108	26	39	42	279241	118612	243342	209315	135331	118191	0.003035755	-1315420354	down
	RN7SKP129	ENSG00000222220	30	46	49	10	21	11	0.639502	118674	17558	0.280296	0.244264	0.284169	0.002824822	-1701368222	down
	GCSH	ENSG00000140905	96	87	61	40	44	20	254038	214548	179105	15785	112551	892193	0.002645784	-135937131	down
	KCNE1	ENSG00000180509	74	114	99	40	67	34	136978	0.88152	120309	0.730154	0.774781	0.451092	0.002626493	-1146697927	down
	KIRREL3	ENSG00000149571	352	380	452	233	140	247	257628	239036	333664	164116	108646	156515	0.002583644	-1005694755	down
	RNF224	ENSG00000233198	39	56	57	18	18	21	0.413394	0.612003	0.57624	0.308138	0.177973	0.28191	0.002520897	-1506245124	down
	PRKN	ENSG00000185345	116	74	125	48	46	50	441167	0.685184	284502	0.785395	0.759241	202063	0.002352305	-1255010402	down
	PLEKHS1	ENSG00000148735	1418	964	2206	385	284	624	108941	56235	144283	279044	162534	409517	0.002332921	-1922610145	down
	COL13A1	ENSG00000197467	75	64	36	13	26	24	0.664062	0.544296	0.43687	0.126095	0.147913	0.213827	0.002332133	-160961105	down
	CYTL1	ENSG00000170891	31	56	46	7	14	20	0.858513	110994	142366	0.184497	0.53987	0.458403	0.002329335	-1786658266	down
	AL139393.2	ENSG00000272841	255	286	796	169	217	215	33242	323401	850364	231591	228517	272173	0.002317367	-1273726113	down
	AP000553.1	ENSG00000207751	39	63	31	14	14	15	10642	0.87354	110357	0.363801	0.300142	0.537121	0.002197519	-1708075885	down
	AC105105.3	ENSG00000274354	16	30	26	1	7	5	0.619758	102734	0.861389	0.0704247	0.118567	0.280599	0.002193555	-259241582	down
	AC002454.1	ENSG00000237819	189	108	95	74	51	37	221523	105887	119747	893043	508713	32163	0.002183131	-1401028936	down
	AC092919.2	ENSG00000279673	78	94	76	45	40	28	136883	139513	113935	0.810626	0.501996	0.440706	0.002150241	-1233775756	down
	SLC26A9	ENSG00000174502	141	103	114	59	57	61	0.798603	0.453739	0.693866	0.357753	0.1874	0.386462	0.002129926	-1136001218	down
	MFAP5	ENSG00000197614	17810	11976	5710	3264	1290	1281	304897	177518	101928	612305	217872	223311	0.001997695	-2687933135	down
	FLNB-AS1	ENSG00000244161	45	66	68	8	29	26	0.462312	0.490828	0.681063	0.185855	0.252436	0.297149	0.001988351	-1633766522	down
	STARD4-AS1	ENSG00000246859	89	112	132	29	59	65	0.732686	0.918431	0.78375	0.161944	0.566044	0.323853	0.001934146	-1238897614	down
	FAHD2B	ENSG00000144199	103	123	91	48	35	59	172025	162368	132732	0.519484	0.398249	0.909872	0.00183662	-1235056549	down
	UBE2C	ENSG00000175063	10900	11369	6749	7036	3947	4023	316012	253276	183882	183755	842677	102.09	0.001807887	-1023152566	down
	SGK494	ENSG00000167524	280	263	132	57	160	100	800259	683071	430424	268216	410069	249974	0.001791286	-1250070399	down
	AL035413.2	ENSG00000270728	120	86	76	31	44	49	10665	0.915645	0.43819	0.427808	0.725344	117647	0.001773844	-1317178934	down
	TACR1	ENSG00000115353	110	142	85	47	68	54	148665	0.752722	0.474168	0.266705	0.614597	0.5647	0.001751917	-1104711967	down
	CENPW	ENSG00000203760	1329	1241	772	779	429	461	447138	32002	239975	241294	122106	147343	0.001743236	-1079858058	down
	AURKB	ENSG00000178999	3254	3320	1828	1984	1060	1089	668543	58.87	356609	37.63	165299	203294	0.001733116	-1094061296	down
	MANCR	ENSG00000231298	23	29	31	4	10	5	0.46581	0.381367	0.38844	0.0589379	0.0738527	0.116901	0.001732881	-2263841892	down
	IFNE	ENSG00000184995	201	280	129	114	115	75	370672	398956	221572	200847	160348	134745	0.001672352	-1096793109	down
	TMEM110-MUSTN1	ENSG00000248592	29	51	37	11	7	14	240141	342692	161274	115603	217083	0.61919	0.00166788	-193081634	down
	SLC29A4	ENSG00000164638	343	392	701	210	272	284	310352	301775	634069	187669	200597	274083	0.001660947	-1020438151	down
	LINC01589	ENSG00000238120	108	96	90	54	35	40	534195	422068	483744	301714	178825	190956	0.001599248	-1283743347	down
	ANKRD63	ENSG00000230778	61	70	20	10	21	11	12537	0.985839	0.361212	0.197693	0.330858	0.157014	0.001582372	-1978775275	down
	AC004067.1	ENSG00000273447	39	31	29	10	10	6	103185	0.804538	0.808986	0.288513	0.242977	0.215579	0.001579833	-205685046	down
	LINC01529	ENSG00000225872	119	127	72	52	49	44	18603	157285	102312	0.691197	0.510736	0.621368	0.001566244	-123355851	down
	TUBB8P1	ENSG00000229298	24	20	27	2	7	4	0.906271	0.589394	0.769842	0.0686903	0.231188	0.205197	0.001547697	-2606022542	down
	AL441992.1	ENSG00000223478	183	120	196	97	69	65	105732	574422	102978	58943	275408	35549	0.001517634	-1226526894	down
	EFNB3	ENSG00000108947	495	362	853	287	143	292	391403	246626	626698	225535	0.981007	225779	0.001476771	-1326398883	down
	SELENOTP1	ENSG00000233846	84	85	85	30	51	38	0.132697	0.511015	0.367721	0.119472	0	0.239256	0.001466691	-1224640869	down
	AC007731.2	ENSG00000215493	162	144	112	71	72	70	21402	158093	150424	103175	0.88203	0.997809	0.001464651	-1085308538	down
	GDF5	ENSG00000125965	29	42	31	10	12	3	0.703256	0.609206	0.547759	0.261871	0.165234	0.0668184	0.001418781	-2143596088	down
	AC005722.2	ENSG00000262681	31	21	59	10	6	9	0.315465	0.166552	0.464497	0.084601	0.050303	0.0598187	0.001380395	-2259653151	down
	C16orf74	ENSG00000154102	94	85	125	42	39	53	304956	281987	391813	180009	128858	177227	0.001373863	-1287050229	down
	KCNC4	ENSG00000116396	77	134	85	26	64	41	0.88288	0.738203	0.557673	0.18134	0.333455	0.36464	0.001370164	-1294380899	down
	ALDH4A1	ENSG00000159423	896	649	735	529	366	333	119161	847094	102622	609535	440391	401592	0.001353594	-1000838109	down
	AP001107.9	ENSG00000255468	72	54	78	18	27	33	293559	131337	220263	0.380321	0.717546	0.438091	0.001342368	-1516014296	down
	AGTR1	ENSG00000144891	140	328	184	105	106	113	208012	339291	253592	132968	117005	117335	0.001336582	-1067122532	down
	PCDHB7	ENSG00000113212	147	141	181	69	102	83	166142	116788	17519	0.774768	0.770149	0.947889	0.001321185	-1013913095	down
	CSMD3	ENSG00000164796	219	351	244	77	232	103	0.428429	0.627801	0.438312	0.317088	0.386198	0.257335	0.001300425	-1130619942	down
	AL513165.1	ENSG00000234160	283	240	156	119	144	85	999047	840527	535429	451772	342078	36681	0.001295975	-109803211	down
	AC084346.2	ENSG00000264448	57	56	90	10	27	32	205193	203299	460921	103512	115709	11757	0.001290669	-1688934693	down
	TMCC1-AS1	ENSG00000271270	196	242	128	87	104	103	25948	221453	174775	136083	0.911862	141748	0.001267727	-1042712397	down
	AC125807.2	ENSG00000250899	265	200	170	119	93	104	193706	117558	120485	0.821227	0.568015	0.812884	0.00120722	-1115398653	down
	CNFN	ENSG00000105427	111	113	69	48	28	40	738863	570828	418622	311881	14589	236614	0.001190808	-1416054209	down
	IRX3	ENSG00000177508	114	149	157	58	90	75	154248	139654	184227	140854	0.998667	0.784195	0.001156629	-1028623885	down
	CCDC167	ENSG00000198937	1114	902	731	637	432	371	46939	30289	300097	260729	145537	154206	0.001148204	-1032960015	down
	LRMDA	ENSG00000148655	208	223	218	142	100	97	329466	345669	315294	210883	238218	15914	0.001119196	-1026548424	down
	AC010538.1	ENSG00000275734	152	143	136	47	83	85	125769	0.904238	110212	0.423121	0.573964	0.645242	0.001006017	-1130379634	down
	GATD3B	ENSG00000280071	254	222	143	108	117	90	130622	816959	734526	594058	577748	418193	0.00100197	-1095344143	down
	AC026401.3	ENSG00000280206	81	52	50	25	23	14	0	0	0	0	0	0	0.000974391	-1696969363	down
	FMN1	ENSG00000248905	64	77	174	7	44	40	0.32075	0.27919	0.408158	0.100716	0.165809	0.239984	0.000969713	-1947852923	down
	HNRNPA1P41	ENSG00000220937	103	34	43	23	8	11	0	0	0.0514838	0	0	0	0.000933265	-2224386778	down
	ABCC1	ENSG00000103222	246	296	679	202	133	169	132759	111822	422197	0.878107	0.488764	0.952484	0.000916135	-1359872241	down
	PROS1	ENSG00000184500	302	394	567	125	256	257	237994	260565	443083	0.991735	164324	190372	0.000916035	-1108238007	down
	PCDHB13	ENSG00000187372	74	76	106	22	45	39	0.361192	0.320438	0.455968	0.118705	0.19747	0.164435	0.000901087	-1406122353	down
	AL137003.2	ENSG00000272341	168	252	261	110	95	138	168747	206559	242758	117496	0.815719	135755	0.000868378	-1064488023	down
	FP565260.1	ENSG00000275464	701	563	278	212	289	257	514663	318095	189728	138166	144992	182472	0.000867911	-1156409928	down
	LINC02454	ENSG00000256268	122	151	74	18	80	26	499297	506488	288298	0.956269	227104	108001	0.00086014	-1662174448	down
	TAS2R14	ENSG00000212127	17	45	11	2	5	0	0.234223	0.656932	0.224837	0.0914587	0.107886	0	0.000848391	-3484922089	down
	SLC12A5	ENSG00000124140	66	75	88	18	47	26	851737	102368	106779	380901	540369	345553	0.000833847	-1480170569	down
	BX005040.4	ENSG00000283541	12	24	34	4	3	2	0.187225	0.319885	0.463819	0.0571986	0.0238821	0.0283603	0.00083212	-3048785783	down
	CRYZL2P	ENSG00000242193	174	152	271	79	49	110	206003	149339	259427	0.960834	0.89248	123111	0.000821106	-1409881496	down
	CRYGS	ENSG00000213139	170	192	155	107	89	61	412905	42838	373904	310768	172895	135926	0.000813922	-1107345453	down
	NAALADL2	ENSG00000177694	116	120	96	42	64	55	139932	192557	0.91091	0.600259	0.759492	0.674692	0.000800781	-1165730028	down
	LINC00893	ENSG00000241769	153	142	179	84	95	40	588923	426782	555564	29185	264612	211176	0.000798197	-1248390085	down
	CCNA2	ENSG00000145386	6029	6222	3175	3303	2482	2209	461433	382113	233996	239706	146859	164258	0.000760042	-1036672254	down
	TGM5	ENSG00000104055	477	373	721	241	239	307	571288	357345	808171	266087	234503	370175	0.000748486	-1110688613	down
	RRM2	ENSG00000171848	5969	6460	3051	3347	1942	1976	152089	137562	730197	652351	466273	465689	0.000740825	-1161164336	down
	XIST	ENSG00000229807	22953	24491	22349	3946	14154	14615	137396	111845	114438	609657	649971	775002	0.000738539	-1235355731	down
	ZNF488	ENSG00000265763	152	117	62	44	42	43	1252	0.811325	0.470437	0.430276	0.261349	0.335314	0.000732602	-1476574533	down
	RPL31P44	ENSG00000213657	50	80	93	26	33	28	283834	353718	559692	126323	124016	145391	0.000729489	-1459957337	down
	AC005674.2	ENSG00000261490	136	246	418	97	68	135	103266	131663	259997	0.613761	0.385556	0.905558	0.000729205	-1476384633	down
	AL604028.1	ENSG00000230896	86	57	43	24	22	13	196577	144973	145546	0.71219	0.60168	0.355415	0.000723916	-1790996031	down
	RPS3AP47	ENSG00000205871	133	66	102	42	43	33	466643	132192	319766	129331	108685	0.980597	0.000723075	-1498586411	down
	PEMT	ENSG00000133027	470	474	416	307	201	213	138242	127345	130434	848715	475484	638157	0.000722817	-1000924623	down
	AC131235.1	ENSG00000228205	119	114	99	48	69	42	501498	333017	38151	197417	240574	162701	0.000712314	-1194643028	down
	RHOJ	ENSG00000126785	1245	750	1068	587	342	526	132623	716227	107688	442572	308998	589184	0.000702515	-1175133377	down
	HSPA12B	ENSG00000132622	146	151	162	64	79	91	120008	0.996923	114346	0.436039	0.476271	0.63371	0.000678083	-1081463919	down
	AKR1B10	ENSG00000198074	263	442	472	133	323	140	418535	574024	711151	184721	397841	199293	0.000673762	-1128118679	down
	ADAM33	ENSG00000149451	198	215	608	88	113	174	177298	162577	42985	0.806308	0.739122	149179	0.000673762	-1552182885	down
	PPP1R3G	ENSG00000219607	552	608	345	313	270	214	299236	266779	186662	171582	119615	114801	0.000673391	-1012294199	down
	MATN3	ENSG00000132031	82	107	114	53	44	35	107681	125266	122957	0.670766	0.616099	0.270497	0.000662332	-1292986941	down
	LINC01843	ENSG00000251169	38	85	42	20	13	14	11672	194077	108349	0.533586	0.274855	0.448319	0.000646451	-1861578202	down
	MYCBP	ENSG00000214114	1292	1399	705	674	677	452	227948	232484	107323	113715	830209	957291	0.000621981	-1019736759	down
	RPL7AP31	ENSG00000242083	69	96	58	20	42	24	247838	261897	18631	0.671047	117898	0.910572	0.000599581	-149963392	down
	GALNT15	ENSG00000131386	106	139	301	54	71	85	178548	0.906147	194588	0.35911	0.60129	0.586407	0.000596022	-1486642104	down
	MRC2	ENSG00000011028	3271	2183	4537	1620	1652	1912	171801	83731	218464	919942	765873	837282	0.000573641	-1070471622	down
	TAGLN	ENSG00000149591	133	209	229	91	98	101	352684	432948	566972	240868	136806	193376	0.000564009	-1067881415	down
	VDAC1P1	ENSG00000073905	314	275	193	139	161	107	930644	650869	517842	401536	379842	343124	0.0005623	-1069454277	down
	ENDOG	ENSG00000167136	150	205	116	83	82	62	157224	135143	121734	113256	960614	811018	0.000555319	-1145150891	down
	ERG28	ENSG00000133935	2275	1935	1459	1278	848	771	187683	126741	114955	100582	546366	581152	0.00054357	-106425645	down
	CACNA1A	ENSG00000141837	342	807	735	132	405	310	290853	592812	663951	150681	345014	279191	0.000538396	-1269913798	down
	SLC15A1	ENSG00000088386	77	107	88	36	53	31	0.0433153	0.140886	0.115356	0.158998	0.055339	0.101208	0.000524143	-1296729131	down
	RUSC1-AS1	ENSG00000225855	699	554	429	348	295	224	113393	756135	761837	718659	442259	511451	0.000493955	-107199874	down
	CCNF	ENSG00000162063	2133	2039	1167	1082	920	845	156278	121267	796731	825854	557166	639565	0.000493264	-1006554197	down
	AC006058.1	ENSG00000261786	1399	780	730	573	357	368	71959	334343	368671	289286	151208	175548	0.000456362	-1280207611	down
	SAXO1	ENSG00000155875	78	74	65	33	18	23	0.196189	0.127676	0.195447	0.162779	0.0422007	0.0497338	0.000443254	-1639282468	down
	IGFBPL1	ENSG00000137142	134	175	113	43	93	63	273439	290112	194595	0.958241	146488	111705	0.000442236	-1211680179	down
	GYG2	ENSG00000056998	375	433	829	207	225	311	368643	324005	66322	187553	16544	295113	0.000435043	-1239004121	down
	PDCL3P5	ENSG00000213089	152	159	232	75	90	98	46486	434086	62849	221734	174951	255348	0.000425522	-1157741442	down
	PRRT2	ENSG00000167371	230	216	355	116	115	151	402426	283143	634469	221949	190196	254776	0.0004192	-1173559487	down
	RPL21P16	ENSG00000220842	465	1180	310	304	284	161	134391	229699	930952	749963	699158	351302	0.000415188	-1431340774	down
	PIGCP1	ENSG00000213713	178	140	150	51	83	86	78519	557167	581142	241945	250098	340537	0.000405822	-1222870782	down
	GALNT12	ENSG00000119514	138	144	100	35	59	70	195329	1838	132603	115293	136786	123579	0.000404362	-1333872654	down
	AL513283.1	ENSG00000228536	353	343	187	161	131	121	131035	991965	577092	617124	40667	406664	0.000402794	-1193768154	down
	AC097713.1	ENSG00000228162	33	8	25	0	0	3	150242	0.41568	0.992706	0	0	0.19389	0.000402334	-4607387494	down
	HYAL1	ENSG00000114378	119	115	182	56	75	60	167901	117177	207536	0.560439	0.702256	0.766714	0.000399758	-1250343575	down
	COL9A1	ENSG00000112280	135	106	82	45	45	44	114191	0.767184	0.815005	0.728462	0.314317	111723	0.000391018	-1388463645	down
	C16orf45	ENSG00000166780	55	133	30	8	23	21	152558	918687	0.817292	0.200999	0.51375	0.596496	0.000383016	-2144711347	down
	CGREF1	ENSG00000138028	91	171	128	35	48	73	173389	206988	176731	101289	0.902804	142238	0.000381365	-1395863756	down
	ACAT2	ENSG00000120437	8803	6427	4098	3918	2613	2485	136967	815285	583823	565613	31.79	38415	0.000380688	-1204231003	down
	AC018665.1	ENSG00000279382	179	186	206	46	145	68	472387	359959	452196	100189	269066	20146	0.000379802	-1311631691	down
	DMBT1	ENSG00000187908	174	377	147	58	155	38	0.584899	101276	0.444633	0.247418	0.434379	0.115766	0.000376713	-1612466332	down
	C15orf62	ENSG00000188277	1025	799	572	469	458	303	116484	736588	695027	541412	415562	339661	0.000374513	-1088742238	down
	RTP3	ENSG00000163825	58	81	123	35	32	27	0.986719	123763	190066	0.635793	0.307664	0.398405	0.000359476	-1577707685	down
	HMGA2	ENSG00000149948	753	1441	716	449	728	372	758447	116822	599277	50215	693148	470005	0.000345043	-1014239434	down
	PCDHGA10	ENSG00000253846	63	59	83	27	16	23	0.752699	0.42365	0.804334	0.263068	0.134095	0.209882	0.000337879	-1727159039	down
	PGGHG	ENSG00000142102	559	543	1035	314	247	398	578389	387253	915218	2964	160804	329487	0.000332456	-1246492485	down
	DRAXIN	ENSG00000162490	564	851	681	210	554	365	214528	243188	224666	0.685342	152088	117971	0.000326299	-1027451103	down
	ERV3-1	ENSG00000213462	784	743	975	236	543	512	965802	887425	103957	453459	618537	613598	0.000313097	-1097205735	down
	CHMP3	ENSG00000115561	2713	2101	1991	1414	899	1132	55724	559937	469593	328936	392801	330243	0.000309292	-1076376088	down
	ADAMTS16	ENSG00000145536	342	191	283	112	169	111	382631	0.892839	145034	0.644178	0.743965	0.687664	0.000308972	-1221691308	down
	FEZF1-AS1	ENSG00000230316	975	843	889	567	345	450	159836	117049	139275	792461	35413	751309	0.000306674	-1077807003	down
	NCAPH	ENSG00000121152	2571	2877	1734	1424	840	1224	276484	263451	173512	171571	6596	129039	0.000305547	-1106890061	down
	PLCB2	ENSG00000137841	113	167	128	77	49	32	210126	252774	209643	13646	114156	0.678678	0.000303095	-1442750183	down
	AC006058.4	ENSG00000280435	373	254	169	108	125	122	583899	34523	280266	167151	15882	207848	0.000295552	-1297772642	down
	NKILA	ENSG00000278709	244	226	198	118	138	104	393223	379371	260868	15459	179174	141866	0.00029538	-1014049965	down
	ALDH16A1	ENSG00000161618	578	606	455	356	301	216	716691	630651	475325	625334	325385	261881	0.000280165	-1009602253	down
	LIPA	ENSG00000107798	4694	4119	5970	2857	1989	2783	467285	33282	520661	242453	156557	227202	0.000270934	-1045077374	down
	CASTOR2	ENSG00000274070	257	319	276	83	190	163	452759	47817	488753	131055	311814	293495	0.000268105	-1094430926	down
	FAM173B	ENSG00000150756	422	435	284	219	184	186	884548	761755	53489	529442	37786	410933	0.000267454	-1048377091	down
	CCDC102B	ENSG00000150636	428	376	560	179	185	288	629442	508177	101362	378131	322049	680583	0.000266686	-1168704689	down
	AC093724.1	ENSG00000213222	105	156	39	33	23	28	309224	300636	0.956602	0.896872	0.48833	0.712739	0.000261499	-1894911098	down
	TMEM71	ENSG00000165071	88	218	128	29	81	55	213523	307435	184371	0.570399	122935	122678	0.000257163	-1499493544	down
	ENTPD2	ENSG00000054179	265	175	238	118	75	97	375858	162842	314164	17412	0.874079	128189	0.000257163	-1330707395	down
	SLC4A4	ENSG00000080493	744	811	438	245	451	351	300868	28591	191907	0.873306	151255	141536	0.000248359	-1057787701	down
	KIT	ENSG00000157404	1568	1136	1417	852	343	491	816011	494195	707912	395847	136662	246467	0.000242707	-1366825596	down
	PAPPA-AS2	ENSG00000226604	195	178	159	103	45	38	274758	210627	207569	123284	0.592685	0.476969	0.000241738	-1593986264	down
	CELSR2	ENSG00000143126	3821	4210	5237	1404	3084	2769	105028	909641	126604	513098	688803	722444	0.000235794	-1007205433	down
	MEG3	ENSG00000214548	15156	23225	14415	5387	14384	8761	121.47	143245	106954	564692	93.54	664902	0.000231881	-1024097055	down
	RTL3	ENSG00000179300	41	48	44	3	16	12	0.458305	0.416341	0.44189	0.0467901	0.116926	0.0772245	0.000230638	-2244221512	down
	PCDHGC4	ENSG00000242419	204	214	262	87	112	137	222625	196332	266563	0.878528	0.96158	120708	0.000226655	-1126271913	down
	SLC47A2	ENSG00000180638	1101	826	2535	254	216	358	120394	697534	245824	257679	189526	392109	0.000219308	-2533268904	down
	UCN2	ENSG00000145040	211	289	270	152	132	123	465586	533802	554497	314834	2.54	26323	0.000218711	-1007419739	down
	LINC01305	ENSG00000231453	359	359	460	192	198	239	337805	271152	419157	180206	148796	197542	0.000215885	-1009465494	down
	SLC25A15	ENSG00000102743	528	410	323	192	237	227	818047	546101	483014	315674	285613	311465	0.00021186	-1070960496	down
	AC022150.4	ENSG00000269825	929	1023	775	164	563	495	728784	627768	55934	132803	337807	347316	0.000199598	-1303597113	down
	SIRPA	ENSG00000198053	344	566	406	145	314	240	217216	300408	245487	0.952256	155005	147157	0.000198739	-1028261075	down
	ARHGAP22	ENSG00000128805	614	618	401	335	151	146	660993	540288	452445	386763	165268	208179	0.000180484	-1436351988	down
	PTPRZ1	ENSG00000106278	4037	2957	3603	887	1524	2369	212917	128243	190235	519271	661399	123822	0.000179731	-1274781535	down
	ADAMTS15	ENSG00000166106	2023	1159	1378	821	765	716	871348	420631	560282	348221	259168	290925	0.000179695	-1120390046	down
	FGF1	ENSG00000113578	373	561	973	293	295	270	388424	404247	871757	26089	275654	217335	0.000176927	-1249485492	down
	TNFRSF21	ENSG00000146072	7528	5652	3806	3023	3115	2675	456725	275389	218829	176293	149455	153146	0.000175622	-1072417907	down
	FRZB	ENSG00000162998	312	250	663	163	201	140	243206	153605	45493	109854	104372	110033	0.000168459	-1420208649	down
	SCDP1	ENSG00000226549	88	54	75	22	21	26	152373	0.943359	0.942901	0.337656	0.353374	0.670644	0.000167314	-177957679	down
	ANXA8	ENSG00000265190	34	67	71	21	6	8	0.46549	0.774338	0.941582	0.263577	0.0875428	0.118411	0.000157601	-2338156223	down
	COL11A1	ENSG00000060718	61101	30833	42120	23377	15701	21126	299266	125464	195335	138.99	646586	102837	0.000155568	-1273097447	down
	CENPA	ENSG00000115163	1509	1780	1374	1019	584	676	359955	33525	323557	219234	11975	157153	0.000154082	-1099567126	down
	PNPLA3	ENSG00000100344	238	226	198	64	139	115	213822	186434	240326	0.586702	112662	0.954596	0.000153334	-1198357869	down
	CKB	ENSG00000166165	39173	29900	27891	20701	10336	11606	990733	601614	666267	503996	228252	296033	0.000149034	-1270508101	down
	DIO2	ENSG00000211448	187	396	498	86	209	151	146196	284802	4453	0.53427	132555	0.820646	0.0001486	-1399398333	down
	LDHAP4	ENSG00000214110	304	335	384	196	115	155	751876	646009	86744	459362	209949	364192	0.000148259	-1210171412	down
	PALM	ENSG00000099864	897	1401	2086	461	781	819	87913	114353	181534	485954	659262	808969	0.000146056	-1198275134	down
	BLOC1S1-RDH5	ENSG00000258311	259	173	135	82	84	72	676667	56989	704949	673266	444139	457917	0.000145711	-1384436562	down
	MIR210HG	ENSG00000247095	103	71	122	40	23	33	452102	228671	433505	12581	0.957561	150849	0.000145106	-1726759357	down
	AC007336.1	ENSG00000261997	29	28	52	7	7	6	0.252969	0.200414	0.384988	0.0634543	0.0616069	0.062803	0.00014446	-256514831	down
	ATG10	ENSG00000152348	482	470	407	279	188	204	110521	598345	752429	460381	280197	457212	0.000143684	-1106356945	down
	TMSB4XP4	ENSG00000223551	350	245	276	163	119	111	328649	226204	304241	204275	114965	152849	0.000142843	-1261334442	down
	ADORA1	ENSG00000163485	208	203	207	109	105	101	26308	237654	337666	120234	12444	133681	0.000142843	-1079901683	down
	FGFR2	ENSG00000066468	566	504	344	237	295	214	443793	399276	2669	143534	31095	185339	0.000140678	-1050413172	down
	CDON	ENSG00000064309	191	332	201	60	156	109	179626	211742	135693	0.584653	0.881355	0.865112	0.000140074	-1274183009	down
	MVD	ENSG00000167508	3206	2672	1536	1436	1099	787	469208	341003	22475	216591	162258	12076	0.000138906	-126575227	down
	CTDSPL	ENSG00000144677	3863	3159	2437	1904	1520	1503	295692	196169	181386	128312	101823	11544	0.000138806	-1046422931	down
	AC004817.3	ENSG00000269927	29	52	35	3	13	6	0.407957	0.695793	0.498949	0.0394262	0.147903	0.0976491	0.00013839	-2527880301	down
	FGFR3	ENSG00000068078	4407	2637	3026	1785	2052	1478	29558	149711	189088	108875	107798	109482	0.000138037	-1070685942	down
	LINC00461	ENSG00000245526	925	794	1393	496	362	558	699913	530347	977066	452526	358227	493428	0.000137724	-1229160909	down
	PRSS35	ENSG00000146250	219	315	242	114	125	156	253856	27406	24806	115744	10353	153408	0.000133529	-1058896857	down
	ANKRD65	ENSG00000235098	175	195	251	89	113	107	340446	340364	442039	153479	150949	206251	0.000132965	-1120820979	down
	FXYD5	ENSG00000089327	625	1728	782	363	691	347	190617	380983	219819	104883	144838	100407	0.000131313	-1255200923	down
	CD34	ENSG00000174059	8960	7599	8920	5363	3093	3881	668028	448118	617437	383781	18626	26795	0.000124612	-1131684202	down
	MRAP2	ENSG00000135324	82	157	84	35	55	34	0.95452	155926	110413	0.447935	0.568217	0.385877	0.000123821	-1478520602	down
	C22orf23	ENSG00000128346	301	212	214	96	148	108	178264	187253	274184	172594	166335	194594	0.00012369	-1195750382	down
	RNH1	ENSG00000023191	1064	2102	794	654	712	473	252179	279998	982672	723052	667619	770407	0.000123527	-1177768342	down
	HAS2	ENSG00000170961	1756	903	1363	672	350	584	980513	433186	720357	373485	162028	324706	0.000121888	-1427945433	down
	AL390755.1	ENSG00000279965	461	490	926	248	205	330	602512	519035	10779	305636	221904	393472	0.000119277	-1350312587	down
	AC016596.1	ENSG00000264281	251	233	267	136	137	66	0	0	0	0	0	0	0.000115713	-1273573869	down
	STAG3L3	ENSG00000174353	416	343	251	81	207	160	845053	653957	641383	182325	36372	333418	0.000114103	-1330329717	down
	FDPSP1	ENSG00000225462	56	70	36	15	5	14	144727	146725	0.953341	0.51206	0.107189	0.33903	0.000112038	-2307076809	down
	SULT1A1	ENSG00000196502	68	75	87	15	25	34	145372	110465	131983	0.309113	0.391696	0.656533	0.000109848	-1747053172	down
	KIF18B	ENSG00000186185	7373	7863	4110	3709	2730	2873	44505	354489	22681	188737	117027	160991	0.000103933	-1136979061	down
	ARHGAP11A	ENSG00000198826	161	155	126	68	45	64	0.616827	0.477511	0.444015	0.243317	0.146133	0.240722	0.000101633	-1407666211	down
	NTM	ENSG00000182667	3521	2909	1731	1567	970	975	476427	32963	252451	174415	130436	146285	0.000100497	-1308217626	down
	SPATA5L1	ENSG00000171763	703	1174	883	2171	2019	1831	917655	115041	112527	251395	182283	222673	9.95E-07	1049705452	up
	AC027288.3	ENSG00000257894	50	48	36	118	288	133	0.662807	0.543502	0.473806	168396	314652	178485	9.95E-07	1843003239	up
	THAP1	ENSG00000131931	737	1331	895	2199	3116	2195	106698	158412	110486	275393	327701	253964	9.91E-10	1244811752	up
	FBXO6	ENSG00000116663	1195	1380	1854	4744	3078	2692	214644	202018	294439	712809	409246	427687	9.90E-05	1164701761	up
	CHRDL1	ENSG00000101938	36	60	47	270	315	306	0.31859	0.432603	0.444196	20858	192174	252378	9.88E-21	2549041596	up
	AL118558.3	ENSG00000271780	67	79	60	144	226	143	175846	18181	154632	368002	428523	365462	9.88E-05	1190438544	up
	TMBIM7P	ENSG00000230927	0	3	4	26	42	22	0	0.0739286	0.0580611	0.446327	0.430524	0.283973	9.85E-05	3571325575	up
	TARS	ENSG00000113407	10870	15012	13442	32735	34998	32539	105639	111407	119275	315195	275395	303514	9.84E-14	1257945136	up
	SLC3A2	ENSG00000168003	21964	41286	33163	76341	99586	75188	298722	422492	413439	971979	1030.95	984589	9.84E-11	1289574714	up
	KRT8P11	ENSG00000255815	17	10	5	32	70	87	0.299028	0.157128	0.154314	0.517495	109344	126808	9.84E-05	2423094567	up
	NPTX1	ENSG00000171246	180	402	168	1045	2155	1008	176211	218796	125208	507737	112964	579734	9.81E-15	2377046411	up
	SDSL	ENSG00000139410	1078	2022	1129	3760	4053	2559	213883	28841	202802	63047	551267	412212	9.79E-07	1213619156	up
	PRKAG2-AS1	ENSG00000239911	2	5	6	20	63	32	0.0470516	0.147862	0.218363	0.602037	108028	0.726062	9.68E-05	2996157219	up
	SIRT4	ENSG00000089163	65	166	155	377	468	326	168792	318773	313356	74997	770936	711348	9.66E-07	1514508522	up
	ZNF563	ENSG00000188868	147	298	200	560	946	609	233887	371602	27369	712869	96728	897344	9.65E-11	1608904503	up
	PLA2G4C	ENSG00000105499	243	927	589	2755	4074	2671	568425	14402	831617	485055	609353	454134	9.63E-14	2363151297	up
	CCT6P1	ENSG00000228409	1027	1775	1424	4386	5733	4697	146119	230673	215601	683723	733472	72198	9.60E-21	1716391625	up
	DMD	ENSG00000198947	634	803	692	1833	2582	2294	451899	498471	41902	110135	145946	148953	9.58E-19	1546070071	up
	CCDC30	ENSG00000186409	105	268	205	548	948	681	109832	203099	254807	466001	653044	58095	9.51E-11	1817896328	up
	HIST1H1C	ENSG00000187837	1579	2786	2701	5559	5837	4628	527618	720391	82445	157.18	140014	137875	9.49E-07	1095166745	up
	PER2	ENSG00000132326	357	497	548	911	1304	1157	173441	170792	221519	347618	399861	421944	9.48E-08	1156860586	up
	EGLN3	ENSG00000129521	262	447	275	1445	1343	988	325948	464321	366764	167019	126187	115153	9.47E-15	1863034179	up
	ZNF597	ENSG00000167981	229	456	358	773	878	797	115485	17629	15566	318132	289832	317616	9.41E-07	1151885721	up
	VLDLR-AS1	ENSG00000236404	187	300	214	1555	1344	1087	22543	273655	19069	139305	105943	839753	9.39E-26	2430539029	up
	CFAP53	ENSG00000172361	97	199	140	344	817	501	12261	191678	1465	378821	668381	525601	9.39E-10	1809524613	up
	TMEM132E	ENSG00000181291	5	20	10	41	90	49	0.147386	0.0916207	0.0583198	0.315722	0.386713	0.47148	9.39E-05	2257133937	up
	BASP1	ENSG00000176788	15	30	33	117	171	88	0.273462	0.517065	0.549287	169485	204775	136607	9.36E-08	2152566096	up
	SPRR2D	ENSG00000163216	0	8	1	16	73	34	0	0.320106	0.0761064	0.746276	264064	171051	9.35E-05	3666889289	up
	AC093512.2	ENSG00000285043	265	409	278	669	1070	796	122345	139865	113107	241821	281455	275794	9.33E-10	130391432	up
	FAM155B	ENSG00000130054	2	13	6	29	76	40	0.0218901	0.0953952	0.0610776	0.241622	0.418866	0.259057	9.27E-05	2679615537	up
	SULT4A1	ENSG00000130540	10	63	26	90	206	117	0.109819	0.39149	0.261698	0.824287	172548	112628	9.22E-05	1980721433	up
	IGSF11	ENSG00000144847	80	194	89	287	391	313	0.769711	161498	0.789437	219872	256443	272877	9.19E-06	1374184625	up
	CLK4	ENSG00000113240	1648	2292	1595	3724	4687	4225	208676	223143	186565	345834	449267	469488	9.16E-10	1093537406	up
	PHF24	ENSG00000122733	8	25	15	58	167	97	0.0551814	0.224166	0.0634728	0.450479	0.615147	0.943956	9.13E-08	2624178897	up
	SGCG	ENSG00000102683	19	49	46	133	333	180	0.260362	0.524971	0.645089	196285	345402	255085	9.12E-10	2373256159	up
	CCDC160	ENSG00000203952	18	80	68	150	201	197	0.307612	118787	132637	242152	267891	342603	9.10E-05	1657985428	up
	AL355075.4	ENSG00000259001	0	0	0	379	1097	685	0.429464	0.326932	0.133389	76642	140851	95411	9.05E-20	1177688099	up
	CNKSR1	ENSG00000142675	163	277	165	335	744	496	165872	305469	135743	345611	664673	577844	9.05E-06	126043553	up
	VPS11	ENSG00000160695	2155	2960	2866	5549	8081	6033	176884	17859	21225	476864	453256	38165	9.03E-12	1186296815	up
	TAF1A	ENSG00000143498	305	475	274	628	1098	871	536865	658795	495676	966024	137018	137755	9.03E-07	1193364607	up
	LINC00662	ENSG00000261824	924	1287	1318	3158	3305	2903	174927	191071	226563	471561	443876	435548	9.01E-12	1313488814	up
	RSPH1	ENSG00000160188	6	10	7	36	39	57	0.100151	0.258307	0.199534	0.653706	0.674748	0.879636	9.00E-05	2442937876	up
	INTS12	ENSG00000138785	1458	1910	1855	3981	4123	3518	365049	349239	411997	897982	769982	782517	8.99E-09	1056851939	up
	CDKN2AIP	ENSG00000168564	4101	7217	5519	11621	14213	12104	439003	596165	554282	101667	109454	110263	8.98E-09	1084881133	up
	PMS2P3	ENSG00000127957	579	1048	810	1929	2545	1913	106225	144688	149138	298552	354355	300666	8.95E-11	1295977588	up
	CACNA1G	ENSG00000006283	12	41	47	120	208	173	0.0515253	0.203946	0.199764	0.498414	0.764069	0.703238	8.91E-08	2227624885	up
	ULK4	ENSG00000168038	282	403	307	929	1016	788	34041	329184	296947	611388	468543	420061	8.90E-12	1366306856	up
	SPAG1	ENSG00000104450	1075	1729	1397	2895	3614	3193	746761	906207	84068	153834	15828	160624	8.89E-10	1115046643	up
	CTH	ENSG00000116761	466	950	867	2506	3623	2982	644983	105355	990535	256411	292215	289077	8.87E-17	1903372341	up
	LRRC8D	ENSG00000171492	3598	5027	3919	7581	11060	9153	337714	38252	327104	535512	712453	64294	8.86E-10	1040221866	up
	ZKSCAN4	ENSG00000187626	444	652	462	1052	1508	1215	421578	521966	445115	963667	109648	105167	8.86E-10	1172361106	up
	ENAM	ENSG00000132464	15	37	28	94	162	111	0.0916211	0.121088	0.290118	0.597603	0.613612	0.661844	8.86E-08	2092880012	up
	NOTUM	ENSG00000185269	94	140	207	486	599	427	0.9258	124565	197669	439849	387886	346171	8.84E-09	1666606647	up
	ZNF501	ENSG00000186446	321	667	503	1075	1936	1559	42163	649943	63778	110125	167288	146965	8.82E-10	1517116525	up
	SLC30A2	ENSG00000158014	19	66	35	264	519	278	0.275767	0.583983	0.294436	249591	373373	246532	8.81E-18	3042720027	up
	PLXDC2	ENSG00000120594	0	2	1	39	79	47	0	0.0251057	0.00318234	0.322973	0.356337	0.328895	8.80E-08	5657379416	up
	SNAP25	ENSG00000132639	70	207	151	567	589	566	0.96905	202506	165146	618256	483141	555107	8.78E-11	1949405252	up
	TAPBPL	ENSG00000139192	1080	1264	1230	3435	3360	2736	174595	164266	183344	612733	452528	429924	8.72E-12	1314188274	up
	UBE2Q1-AS1	ENSG00000229780	11	25	8	43	101	102	0.160487	0.245683	0.592062	0.575259	0.491032	129918	8.72E-06	2391404388	up
	SLC9A5	ENSG00000135740	88	191	176	243	550	400	0.761956	115593	13817	160136	336143	23432	8.72E-05	1276001836	up
	CIDECP	ENSG00000186162	1141	1559	1301	3522	4502	2723	287365	308784	287176	791695	791043	600956	8.66E-12	1312709364	up
	EPB41L4A-AS1	ENSG00000224032	886	1761	1337	3524	3844	2874	380489	586986	513406	145897	126545	112155	8.65E-09	1282182681	up
	AFAP1	ENSG00000196526	2203	2066	2383	6161	8433	7928	779627	70488	905865	195705	233925	256734	8.62E-17	1635029558	up
	THUMPD2	ENSG00000138050	785	1553	1255	4298	4504	4405	114601	164112	144043	49477	42808	492279	8.62E-17	1805583016	up
	MCEE	ENSG00000124370	261	417	267	845	992	769	823104	96306	769723	229395	21.04	212101	8.62E-11	1371761429	up
	NXF3	ENSG00000147206	5	33	33	103	206	81	0.0637364	0.398269	0.676085	170892	187785	0.984988	8.62E-06	2343698906	up
	KRCC1	ENSG00000172086	1005	1193	1121	2407	2558	2306	129138	120614	135803	285658	240382	26454	8.59E-09	1030136657	up
	NR1D2	ENSG00000174738	5055	7873	8563	13791	15293	16880	377612	455921	562168	731065	85916	102157	8.58E-06	1010290164	up
	BBS12	ENSG00000181004	261	498	401	738	1133	854	255067	326128	301565	553263	666899	601509	8.57E-07	1132351534	up
	LINC01823	ENSG00000224655	4	17	11	30	104	55	0.0674126	0.345264	0.31618	0.848319	239001	174603	8.53E-05	2435918506	up
	LPAR5	ENSG00000184574	6	4	1	22	64	28	0.0832908	0.0395433	0.0389369	0.260222	0.49725	0.272782	8.44E-05	3196136215	up
	MIR4500HG	ENSG00000228824	8	6	9	75	50	76	0.153524	0.196575	0.312335	147184	103206	182522	8.43E-08	3043484481	up
	ZNF222	ENSG00000159885	284	448	397	896	963	894	63936	752462	834023	160555	14031	172362	8.41E-09	1198182156	up
	RIPOR3	ENSG00000042062	79	147	187	342	339	360	0.750043	0.812529	209449	257102	163645	233081	8.41E-05	125250852	up
	APLN	ENSG00000171388	64	88	73	221	361	173	0.582078	0.691335	0.567056	178378	207908	133703	8.36E-08	1615547801	up
	WNT10A	ENSG00000135925	6	19	23	158	108	131	0.180768	0.195981	0.279679	157696	0.98683	133632	8.35E-11	2991387155	up
	SPATA17	ENSG00000162814	27	43	42	104	136	89	109028	102352	148227	364739	355512	246834	8.32E-05	1445628629	up
	AC083841.1	ENSG00000253196	35	133	73	562	445	420	1262	537328	303916	205495	141639	165231	8.27E-13	2531920314	up
	AFAP1-AS1	ENSG00000272620	8	8	11	23	72	70	0.0575123	0.0407758	0.0535766	0.13521	0.254612	0.316901	8.27E-05	2471490126	up
	ISL2	ENSG00000159556	78	111	103	342	263	205	14708	228663	210288	671043	470589	380198	8.26E-06	1390193914	up
	SLC6A13	ENSG00000010379	16	33	26	60	141	77	0.230066	0.583792	0.483872	0.856681	146668	0.814599	8.25E-05	1761394897	up
	LINC01176	ENSG00000281404	69	102	108	266	282	191	161793	162285	192752	560343	442183	320927	8.24E-06	1304280117	up
	SNAPC1	ENSG00000023608	518	1194	759	2800	3521	2768	796873	137047	110294	374053	405103	383281	8.23E-15	1803169929	up
	RAMP3	ENSG00000122679	12	16	14	54	78	46	0.328336	0.511195	0.338816	116935	128436	0.928693	8.22E-05	1962812086	up
	JAM2	ENSG00000154721	331	462	395	1121	1269	1198	396833	484786	450437	129629	137642	136944	8.21E-16	1500227759	up
	TEF	ENSG00000167074	2170	2529	2326	5528	7670	5614	126759	110571	121152	26723	299618	266639	8.21E-16	1300707651	up
	TRPC4	ENSG00000133107	12	35	25	484	600	501	0.118889	0.305511	0.19318	327896	315948	37359	8.20E-51	437224158	up
	ZNF136	ENSG00000196646	596	1110	999	1799	2538	2308	440466	702585	679934	128245	146629	152126	8.13E-08	1204451576	up
	TSGA10	ENSG00000135951	151	268	232	388	646	476	300436	597891	643952	541256	692712	744177	8.13E-06	1105178615	up
	AC084824.5	ENSG00000276148	14	20	29	114	96	67	0.172991	0.66018	0.956518	448587	317502	202051	8.12E-06	2042032031	up
	LINC01881	ENSG00000220804	40	65	58	112	182	138	182516	143869	220725	272288	449373	310195	8.09E-05	1294551628	up
	KDM4D	ENSG00000186280	163	220	140	303	635	401	172566	176199	12118	28708	44882	356751	8.07E-06	1224653696	up
	PIWIL4	ENSG00000134627	31	38	41	124	127	136	0.445251	0.558465	0.35661	214381	112111	138553	8.06E-07	1719158884	up
	RGS7	ENSG00000182901	779	901	587	2181	1494	1443	865193	75561	605483	192049	106353	133595	8.04E-05	1097825184	up
	IFNB1	ENSG00000171855	12	26	97	3433	2050	2422	0.427366	0.812733	362384	959597	478437	672023	8.02E-10	5799387007	up
	CBX4	ENSG00000141582	2379	3936	3280	6672	9631	6675	233725	293656	311568	571397	698815	573797	8.02E-10	1154294258	up
	ZNF773	ENSG00000152439	628	1033	882	2345	3242	2871	859055	11512	123222	272253	310542	329908	8.00E-18	1636937031	up
	ZNF671	ENSG00000083814	782	1351	852	2100	2565	2069	775236	107547	804273	19127	185369	182321	8.00E-08	108663793	up
	KLK10	ENSG00000129451	7	8	4	95	45	29	0.318997	0.184532	0.206847	204993	0.914303	108573	7.99E-06	308923988	up
	ZBED3-AS1	ENSG00000250802	109	171	160	337	316	310	229895	30354	407634	784796	649769	841438	7.98E-05	1047227558	up
	MMP8	ENSG00000118113	3	18	9	309	355	202	0.0437236	0.146639	0.0677897	218928	29092	210105	7.96E-30	4766528654	up
	CISH	ENSG00000114737	31	52	29	99	167	147	0.359329	0.603124	0.503891	123822	16715	184069	7.92E-07	1780475217	up
	NEURL2	ENSG00000124257	21	55	50	125	194	118	381016	342785	470156	10744	137555	125414	7.92E-06	1691147593	up
	RNF219	ENSG00000152193	478	682	578	1135	1449	1308	721791	861893	768823	134224	14789	171755	7.86E-09	1063545566	up
	MPZL3	ENSG00000160588	39	71	38	141	285	157	0.450451	0.537603	0.323993	111473	208258	119183	7.86E-08	1856921334	up
	KLF10	ENSG00000155090	3561	8789	9702	18263	28249	23552	25.43	485561	632464	117177	148887	149594	7.86E-08	1575263767	up
	C12orf60	ENSG00000182993	77	103	72	190	235	208	152615	147038	120983	361388	389373	378829	7.86E-06	1228007355	up
	HSPBAP1	ENSG00000169087	576	931	853	2382	3397	2611	717939	875697	958118	244187	278704	262358	7.83E-20	1725133941	up
	PRTG	ENSG00000166450	139	297	201	288	896	603	22084	342663	227586	426164	590672	503006	7.81E-05	1365338899	up
	KDM7A	ENSG00000006459	102	382	316	497	1366	1011	0.346592	128782	114759	205084	505595	447807	7.78E-06	1745490993	up
	HTR3E	ENSG00000186038	4	2	0	122	56	50	0.0727659	0.0598818	0	133585	0.749058	0.700817	7.76E-10	5174818161	up
	PTK6	ENSG00000101213	53	74	78	181	315	306	0.188535	0.31302	0.325835	0.899213	103008	12005	7.76E-10	1855122903	up
	LINC02084	ENSG00000272282	35	48	42	188	267	148	0.545106	0.856837	105417	365453	392845	263928	7.72E-12	2149154167	up
	PEX12	ENSG00000108733	533	675	511	1010	1638	1256	735352	693994	601264	106371	149744	133066	7.71E-08	1064084165	up
	AZIN2	ENSG00000142920	52	157	145	347	555	319	0.975393	173087	284048	510217	691232	436653	7.70E-07	1687336505	up
	CCDC184	ENSG00000177875	20	34	36	86	170	113	0.290352	0.413286	0.431869	104892	16445	126788	7.66E-07	1910390526	up
	RAD9B	ENSG00000151164	83	129	101	422	425	374	115326	120107	0.843999	374403	346319	456985	7.63E-15	1876641234	up
	TTLL9	ENSG00000131044	17	50	29	115	183	104	0.0370107	0.505004	0.31907	0.999617	121154	0.907669	7.57E-07	1970107684	up
	ERAP2	ENSG00000164308	573	801	1098	1978	1860	2163	391462	45628	783025	977868	889191	120444	7.55E-06	1193029447	up
	THAP2	ENSG00000173451	254	375	292	746	1001	827	477883	586473	514763	119847	149566	151968	7.52E-13	138056078	up
	RARG	ENSG00000172819	791	970	1384	2577	2099	2350	662106	693834	111575	213619	140264	181214	7.52E-05	1072660279	up
	AL031777.1	ENSG00000217275	24	65	46	109	289	101	102289	266183	271719	449332	108586	403596	7.51E-05	1748708261	up
	STXBP5L	ENSG00000145087	104	164	150	241	360	318	0.501252	111669	0.605924	0.701521	186461	156044	7.50E-05	1032451885	up
	APBA3	ENSG00000011132	808	1511	920	2192	3040	1851	184966	256446	184012	375238	550957	380713	7.47E-06	1032091656	up
	CRTC2	ENSG00000160741	3547	5881	4334	8608	12407	8648	324517	433864	375595	752653	855111	703075	7.44E-08	1004747224	up
	SNHG15	ENSG00000232956	1450	2039	1367	4659	6005	4241	388343	414036	360013	118017	122253	103435	7.41E-17	1513196881	up
	ZFHX4-AS1	ENSG00000253661	48	63	59	137	177	156	116247	0.98514	140203	372588	520676	493549	7.40E-06	1360911861	up
	FAM90A25P	ENSG00000251402	4	21	20	76	91	69	0.13735	0.378804	0.318939	13525	11826	115441	7.37E-06	2312465095	up
	TF	ENSG00000091513	21	23	22	104	107	93	0.372146	0.547614	0.398521	233382	214223	20953	7.34E-08	2100481591	up
	CIR1	ENSG00000138433	952	1367	1576	2814	3649	3337	122387	140072	182912	301676	319592	351493	7.32E-09	1227812532	up
	LRIF1	ENSG00000121931	1019	1737	1516	2662	4034	3041	129257	179384	179555	251762	339481	299453	7.32E-08	1083903043	up
	A2MP1	ENSG00000256069	4	5	4	23	69	69	0.194775	0.104093	0.0855419	0.750742	107001	0.90156	7.32E-07	3502667164	up
	LRRC49	ENSG00000137821	426	773	708	2829	3156	2980	524323	780506	851035	30129	325538	381839	7.24E-25	2150265454	up
	LEAP2	ENSG00000164406	73	94	77	247	313	227	137038	137379	114397	387349	294037	289075	7.24E-10	1579331654	up
	CXCL11	ENSG00000169248	83	135	224	1613	1172	1335	176998	1867	350445	220127	130491	181267	7.23E-23	3146705859	up
	BAMBI	ENSG00000095739	473	861	621	1653	1550	1155	67263	904848	808346	201006	154825	140039	7.21E-06	1080527793	up
	DUSP15	ENSG00000149599	283	671	469	1441	1636	1266	50084	105014	792078	251281	214519	208935	7.19E-10	1536773847	up
	XPA	ENSG00000136936	1042	1422	1148	3007	2722	2423	158514	171992	167561	436702	312376	336118	7.18E-08	1088931414	up
	ARHGEF16	ENSG00000130762	5	19	27	58	116	70	0.104519	0.174791	0.231565	0.796175	0.836071	0.755705	7.11E-05	2139568364	up
	TYW5	ENSG00000162971	692	1018	1036	1974	2333	2209	67398	813602	868722	184076	180427	196861	7.08E-09	1151034806	up
	ZNF367	ENSG00000165244	3744	4898	3275	9046	10454	9976	219627	226309	181522	484414	453735	523309	7.06E-11	1211859967	up
	RBM24	ENSG00000112183	217	509	463	845	1615	1250	406975	612383	692111	104778	15964	155763	7.03E-08	153969444	up
	ZNF860	ENSG00000197385	20	19	11	75	80	71	0.186751	0.170596	0.0935076	0.730535	0.678994	0.614472	7.03E-06	2069751643	up
	LYG1	ENSG00000144214	90	153	120	341	507	308	148765	25365	244239	709858	888839	586511	6.97E-10	1560221027	up
	TRIML2	ENSG00000179046	16	37	12	64	115	79	0.39244	0.652453	0.210331	11802	150344	140194	6.95E-05	1893473135	up
	ZBTB49	ENSG00000168826	490	820	648	1241	2025	1573	541953	709817	609709	124128	178232	178352	6.93E-09	1198999491	up
	ESAM	ENSG00000149564	46	96	73	176	187	181	0.596327	10564	0.953858	239171	18874	221467	6.93E-05	12627683	up
	TNFRSF10D	ENSG00000173530	12	19	18	86	171	98	0.0374661	0.128593	0.150986	0.60867	0.86029	0.591113	6.90E-11	2724529331	up
	TMEM108-AS1	ENSG00000251011	48	40	33	138	165	104	156501	0.737344	0.863261	326995	327408	275061	6.89E-06	1621855546	up
	DNAH7	ENSG00000118997	37	63	63	124	208	159	0.283055	0.402449	0.670092	11223	120195	0.809291	6.69E-06	1478128988	up
	AC091812.1	ENSG00000231317	6	36	20	84	209	165	0.0946292	0.26164	0.197883	0.499365	126746	139843	6.65E-09	2798762773	up
	AL031985.3	ENSG00000260920	189	213	200	874	516	549	191947	202912	20247	823972	395535	540688	6.65E-08	1614402246	up
	EPHA4	ENSG00000116106	845	1021	995	1630	2590	2179	578021	507743	589221	864473	955022	945033	6.62E-08	1041083737	up
	TMEM198	ENSG00000188760	369	649	325	1144	1019	828	446605	609117	390677	127551	94272	923606	6.60E-05	1087420853	up
	PWWP2B	ENSG00000171813	398	591	504	1261	1248	1083	413356	474814	489228	114862	917638	987387	6.57E-09	117902321	up
	CDYL2	ENSG00000166446	21	27	16	62	206	93	0.120609	0.23882	0.0919945	0.284935	180382	0.79644	6.57E-07	2332299094	up
	CEBPB	ENSG00000172216	2347	4569	4769	8771	9202	7086	302351	458209	563082	100564	872753	814423	6.55E-05	1016526493	up
	FAM209A	ENSG00000124103	11	15	12	70	119	71	0.521195	0.706756	0.421291	28474	431067	311213	6.54E-09	2647776392	up
	ZNF474	ENSG00000164185	14	11	16	80	118	92	0.545688	0.242611	0.326869	129822	184104	205929	6.48E-10	2692622259	up
	RAET1L	ENSG00000155918	82	122	78	744	828	693	215622	263507	207923	164246	156822	156275	6.46E-40	2913090112	up
	FAM200A	ENSG00000221909	563	881	651	1419	2349	1811	591342	73745	619362	128179	171275	15644	6.46E-11	1303741486	up
	AC004877.1	ENSG00000273419	39	105	77	309	405	251	0.627452	109269	0.96547	306452	392821	347251	6.46E-11	2038347976	up
	YY1AP1	ENSG00000163374	4236	5942	5248	10532	13463	10486	574255	673457	692938	146915	141622	132.87	6.46E-11	1055475859	up
	ADAP1	ENSG00000105963	71	87	157	766	722	587	211958	215876	481985	181456	15569	156874	6.44E-18	2616511378	up
	ZC3HAV1	ENSG00000105939	6793	6704	11880	21893	25484	28722	249639	211711	425287	956118	854263	110885	6.44E-08	1471641841	up
	SLC7A5P1	ENSG00000260727	54	124	103	261	372	265	252178	531899	48755	12423	135066	112802	6.44E-08	1581301145	up
	ZNF385C	ENSG00000187595	63	102	127	636	492	436	0.751585	0.971049	138714	704164	454378	438033	6.42E-15	2342914179	up
	GET4	ENSG00000239857	69	159	119	226	405	332	66249	70132	755622	204676	194451	192255	6.41E-06	1376448876	up
	MITD1	ENSG00000158411	775	1155	1070	2045	2619	2055	198097	251865	282364	56017	566726	566293	6.39E-09	1060400788	up
	PPM1E	ENSG00000175175	805	1601	1370	3294	4704	4241	323585	505914	486193	117073	131292	142467	6.36E-13	1607476829	up
	SCN4A	ENSG00000007314	4	8	19	53	64	56	0.0220362	0.0305949	0.0895495	0.31109	0.798066	0.732322	6.36E-05	2374711849	up
	PILRA	ENSG00000085514	47	66	92	262	224	200	123008	123365	237467	476279	394142	497831	6.35E-07	165267294	up
	VANGL2	ENSG00000162738	166	523	488	673	1539	1204	123122	200614	248304	308474	568503	502258	6.35E-05	1438307449	up
	CCT6B	ENSG00000132141	116	127	149	408	383	381	199172	167658	210327	536621	357302	530736	6.34E-09	1481380534	up
	ZNF134	ENSG00000213762	1690	2698	2234	4189	5864	4616	110376	130324	128568	219293	27219	258843	6.32E-09	1045664794	up
	PPP1R15A	ENSG00000087074	9427	22814	24670	33673	60994	46423	899025	167723	214845	290366	429823	393172	6.30E-05	1207322743	up
	ING3	ENSG00000071243	944	1628	1472	3068	3231	3110	156332	195259	21985	426729	39.3	425441	6.29E-08	1137138065	up
	TTC41P	ENSG00000214198	36	52	40	93	272	164	114064	0.764669	112839	230855	512039	296044	6.28E-07	1902368742	up
	CCR10	ENSG00000184451	14	25	22	64	86	71	0.504345	0.556369	0.694832	291251	15322	193542	6.26E-05	1756827835	up
	FAM27E3	ENSG00000274026	254	363	254	635	758	501	855465	114932	771653	230729	176289	247731	6.20E-06	1017657321	up
	TUBE1	ENSG00000074935	397	787	602	2300	2774	2273	568316	872524	846891	288698	278088	290411	6.16E-21	1956958611	up
	TOGARAM1	ENSG00000198718	1029	1840	1408	3215	6235	5056	612644	743343	537807	188742	22973	240229	6.16E-13	1654325049	up
	AC073335.2	ENSG00000273142	329	580	476	1140	1214	875	252038	357467	32527	748467	654509	572341	6.16E-07	1133827897	up
	AC093157.1	ENSG00000233184	331	277	232	585	703	551	771174	623358	555738	128719	124313	119823	6.15E-05	1003129852	up
	AL603750.1	ENSG00000280099	31	27	9	256	66	72	0.570989	0.45069	0.176857	356614	0.832405	101352	6.15E-05	2512198529	up
	ATP6V0E2-AS1	ENSG00000204934	664	871	561	1287	1853	1416	590582	622102	50041	104774	119737	110708	6.14E-07	100927494	up
	STK32A	ENSG00000169302	565	725	747	1659	2022	1479	348216	410266	617097	835375	923622	958438	6.10E-11	1230242001	up
	TCEAL7	ENSG00000182916	1179	1782	1711	3571	3480	3873	251945	305198	354547	702627	536743	756824	6.10E-08	1144821519	up
	AC004477.1	ENSG00000263412	209	316	216	417	1159	561	386879	638246	420444	833193	184801	108801	6.07E-06	1378882811	up
	ZNF211	ENSG00000121417	1066	1406	1139	2106	3428	2340	117036	129278	116284	203391	260898	258973	6.04E-08	1002421653	up
	ZNF442	ENSG00000198342	378	909	582	2551	3638	2517	378943	729817	571131	174403	268904	214666	6.03E-19	2135431075	up
	BHLHE41	ENSG00000123095	570	1840	1351	4778	4957	4308	69114	15211	177039	352719	46129	446804	6.03E-10	1846863344	up
	TTC25	ENSG00000204815	163	175	221	389	461	485	245555	215727	332191	485261	484567	537676	6.02E-06	1147554341	up
	PYGM	ENSG00000068976	55	102	71	126	382	199	0.449145	0.774003	12554	120042	181315	134478	6.02E-05	1492198674	up
	ZNF192P2	ENSG00000218016	6	20	17	42	121	58	0.173386	0.437167	0.354297	0.825834	169855	0.97675	6.01E-05	2228828406	up
	ZIK1	ENSG00000171649	1409	2207	1494	2941	5041	3974	125772	154611	129526	198624	320012	28689	6.00E-08	1117976188	up
	C1orf56	ENSG00000143443	271	327	271	649	728	498	405564	458637	34604	114779	776078	696593	5.94E-06	1000565575	up
	LRMP	ENSG00000118308	4	19	15	65	104	52	0.0192502	0.36806	0.101055	0.823294	0.691863	0.456116	5.94E-06	2438968173	up
	ZNF267	ENSG00000185947	625	1032	938	1852	2826	2417	655176	807521	865431	127965	180018	179301	5.93E-11	1348195955	up
	MMP27	ENSG00000137675	1	4	7	61	133	58	0.0241324	0.0381235	0.0448559	0.597933	0.849626	0.504745	5.88E-11	4247467679	up
	MYH16	ENSG00000002079	8	18	19	76	68	74	0.05743	0.247227	0.0822223	110894	0.451803	0.703013	5.88E-06	2201320843	up
	TMEM128	ENSG00000132406	999	1271	1115	2419	3214	2405	158207	159634	166646	294351	312261	280141	5.87E-12	113497107	up
	SUPV3L1	ENSG00000156502	2497	3824	3024	5394	8627	6188	314292	359127	371769	739566	793697	66.21	5.87E-08	1000656021	up
	LYZ	ENSG00000090382	2	4	3	28	27	39	0.166118	0.133073	0.164191	0.793753	0.639128	123804	5.86E-05	3310160122	up
	LINC02340	ENSG00000275294	44	43	47	121	199	113	111916	0.798082	0.865254	234483	329171	18066	5.82E-06	1551730676	up
	FO538757.1	ENSG00000279457	399	636	443	1128	1188	943	260539	345775	248368	687717	425041	473473	5.77E-07	1054173539	up
	CREBRF	ENSG00000164463	1162	2458	3444	4345	9800	8359	888149	153002	229612	209608	515332	481121	5.74E-06	1554950996	up
	MIS12	ENSG00000167842	1246	1790	1428	2947	4091	3292	14.36	16473	149729	309326	352845	324525	5.72E-11	1105096864	up
	TXNIP	ENSG00000265972	6613	12654	10850	28917	32437	29070	492501	743942	748401	194879	180407	193387	5.71E-13	1506198435	up
	CEACAM1	ENSG00000079385	2	3	6	34	60	47	0.0384845	0.0222073	0.293787	0.355379	0.548633	0.402365	5.67E-07	3555531565	up
	MAP7D2	ENSG00000184368	44	172	103	244	894	392	0.631684	157204	0.772925	154649	383291	235759	5.64E-07	2137373386	up
	AKAP3	ENSG00000111254	15	11	19	49	136	96	0.670903	0.420323	0.277104	116976	149118	213725	5.64E-07	2480874791	up
	KLF4	ENSG00000136826	788	1996	3011	14588	17740	15258	745402	135786	242399	112486	106936	112258	5.63E-19	2949193643	up
	RCHY1	ENSG00000163743	1021	1507	1012	2556	3074	2706	223283	276873	225788	493007	577653	547879	5.63E-10	1142938181	up
	ZCCHC12	ENSG00000174460	69	113	78	307	420	258	0.918394	119397	0.967538	350457	388947	297037	5.61E-12	1814551732	up
	PPP1R21	ENSG00000162869	742	1094	928	2033	2548	2273	589891	793207	841931	174112	147742	154754	5.61E-12	12128166	up
	PYROXD1	ENSG00000121350	427	552	495	1053	1444	1097	5492	571974	640303	135145	162384	14779	5.61E-11	1172747738	up
	HID1	ENSG00000167861	394	590	755	1281	2037	1468	505753	491968	738035	11002	135044	137966	5.58E-08	1340577711	up
	STK16	ENSG00000115661	1164	1704	1349	2767	3796	2885	214299	243892	22438	402844	435331	38471	5.57E-10	105819546	up
	ZNF408	ENSG00000175213	1317	2203	1580	3376	5361	3925	146431	191592	158509	319311	414773	392463	5.56E-10	1206568311	up
	RAB3IL1	ENSG00000167994	142	374	422	842	1658	1282	157193	372792	502815	10092	130163	117287	5.54E-09	190674186	up
	SH3BGR	ENSG00000185437	91	203	200	443	703	435	323972	473255	477036	130891	158.53	114442	5.51E-08	1571573851	up
	BEST1	ENSG00000167995	184	543	519	2065	2121	2113	216293	455972	491206	165846	148379	170795	5.45E-14	2276733546	up
	AKNA	ENSG00000106948	724	1296	1211	3069	3626	3045	328986	52326	526874	175481	112637	113121	5.44E-13	1502696193	up
	SNHG8	ENSG00000269893	3444	5283	3399	9783	9749	7318	244523	264982	213636	460128	405.45	344474	5.44E-07	1061976668	up
	FAM169A	ENSG00000198780	1122	1544	1301	1723	4029	3083	633677	813255	676618	773686	188865	166711	5.44E-05	1024305958	up
	GTF2IP20	ENSG00000272645	409	540	397	897	1133	923	327741	308562	277695	576526	520697	550546	5.41E-08	1029238987	up
	ALLC	ENSG00000151360	6	18	12	48	84	46	0.0748531	0.23802	0.109324	0.545509	0.576837	0.595244	5.41E-05	2198089416	up
	HIST1H3E	ENSG00000274750	264	461	468	862	1404	924	253885	324994	508703	67318	957871	703224	5.40E-08	1304501967	up
	TRIT1	ENSG00000043514	1465	2205	1865	4544	4340	3985	191773	258687	227744	583241	470672	486069	5.39E-09	113432978	up
	ABI3	ENSG00000108798	7	14	7	48	68	78	0.108465	0.285309	0.213058	0.680343	0.581869	0.918474	5.39E-07	270685291	up
	SSUH2	ENSG00000125046	48	108	57	266	207	188	0.575929	0.826365	0.71343	275934	201074	223044	5.39E-06	15800294	up
	KCNJ4	ENSG00000168135	1	4	3	23	61	35	0.0221966	0.0869387	0.103146	0.509407	0.758305	0.746965	5.39E-06	3763379584	up
	AC009303.4	ENSG00000279227	59	79	73	143	215	162	12018	132178	143971	281147	307412	275944	5.39E-05	1185534381	up
	ZNF296	ENSG00000170684	53	126	77	419	551	348	0.921254	184001	12569	615187	65099	484221	5.37E-16	2275555795	up
	C19orf54	ENSG00000188493	1024	1297	1078	3800	3911	2865	9.9	101622	919177	296352	252915	219148	5.36E-16	153718946	up
	GDAP1	ENSG00000104381	1373	2080	1425	4187	5000	3995	112611	142393	119346	317951	341523	310764	5.33E-14	1340264233	up
	FAM20A	ENSG00000108950	13	21	16	40	117	70	0.250723	0.181119	0.117698	0.634999	0.635573	0.652985	5.33E-05	2042005971	up
	SLC43A1	ENSG00000149150	64	157	123	428	512	419	0.920903	116037	111382	413517	511298	474817	5.29E-12	1902847605	up
	SMG1P2	ENSG00000205534	251	566	305	837	1250	1061	0.924093	15798	0.90778	244521	290867	303427	5.29E-08	1408626084	up
	CRABP2	ENSG00000143320	310	816	554	1004	1934	1161	803418	168692	132501	222463	360926	265145	5.26E-05	1186481348	up
	AC112484.3	ENSG00000261159	53	102	58	269	204	221	170624	2926	206881	747266	43692	571008	5.25E-07	1646867461	up
	SLC30A3	ENSG00000115194	40	149	73	167	467	265	0.76231	159753	0.800073	181066	370038	267362	5.25E-05	1678103167	up
	NR2F1-AS1	ENSG00000237187	1289	1933	1626	3813	3499	3124	331977	38702	369577	864435	698996	732889	5.24E-07	102428478	up
	ZNF823	ENSG00000197933	301	619	415	843	1558	877	358355	62472	509623	876051	127514	916748	5.19E-06	1184958773	up
	RNASEK	ENSG00000219200	117	162	160	383	639	443	326429	266924	318512	371629	293178	280764	5.16E-12	1615928549	up
	FBLL1	ENSG00000188573	113	186	188	1633	1392	1234	215149	260638	315743	245773	176597	185906	5.15E-37	3049824349	up
	AC125257.1	ENSG00000259623	497	638	459	1290	1477	1148	405381	404112	347181	941298	8.69	802999	5.14E-10	119418583	up
	CCBE1	ENSG00000183287	18	22	41	131	92	89	0.178024	0.214055	0.283018	0.667113	0.509599	0.630197	5.13E-05	1858794549	up
	ZNF419	ENSG00000105136	566	701	601	1615	2014	1586	695942	687363	750713	172462	185754	178941	5.10E-16	137186308	up
	ZNF205	ENSG00000122386	453	817	649	1853	2415	1781	963861	12024	119429	294461	332025	30592	5.10E-15	1561441616	up
	ACHE	ENSG00000087085	240	354	283	1043	1449	1070	256794	342051	303601	107781	120731	110473	5.07E-25	1914413752	up
	ARL14EP	ENSG00000152219	1724	2537	2296	5934	5777	5570	227299	254475	319678	666247	674882	726164	5.06E-12	1313535558	up
	ROCK1P1	ENSG00000263006	13	32	17	99	94	166	0.39189	0.663789	0.706524	171382	149973	32412	5.03E-08	2484446763	up
	ZBTB10	ENSG00000205189	1113	1892	1882	2771	4119	4135	784637	105082	119644	137787	208197	244321	5.00E-06	1077634352	up
	NPIPB6	ENSG00000198156	22	35	20	150	156	138	0.10927	0.371321	0.438185	186142	144394	131772	4.99E-12	2440189674	up
	INHBE	ENSG00000139269	51	159	186	704	676	927	0.814364	13157	181757	692145	61518	843625	4.99E-12	2486816007	up
	HHLA3	ENSG00000197568	701	824	856	2143	2286	1752	235013	221123	261804	630431	550789	501847	4.95E-11	1269201049	up
	ZNF420	ENSG00000197050	482	826	607	1301	1952	1404	688969	103594	729707	177472	223339	16877	4.95E-09	117892988	up
	ZBTB48	ENSG00000204859	1475	2168	1592	3952	4810	3433	224493	286367	252982	606251	523461	466457	4.92E-10	1119554339	up
	RRN3P1	ENSG00000248124	301	597	400	909	1370	1004	301464	518623	421009	811979	123103	989534	4.92E-08	1243879238	up
	NR1D1	ENSG00000126368	4283	9776	7982	23718	35487	25402	370842	648826	628812	193253	219187	188102	4.90E-15	1848816826	up
	TFP1	ENSG00000242337	10	9	12	37	61	63	0.167579	0.25005	0.318681	0.58102	160132	180427	4.89E-05	2254805371	up
	CMYA5	ENSG00000164309	582	1070	1136	1195	3641	3092	162517	217257	301641	556745	76868	734176	4.87E-05	1382506871	up
	LRRC61	ENSG00000127399	23	41	34	68	151	113	0.443551	0.726923	0.591483	14206	246627	173759	4.84E-05	1640522103	up
	LNP1	ENSG00000206535	231	253	187	465	572	450	304695	267048	266981	578987	588731	543858	4.83E-06	1034805631	up
	IL17RE	ENSG00000163701	46	76	82	164	239	178	0.398191	0.712798	108076	173277	241114	156977	4.83E-06	1400172158	up
	ZNF670	ENSG00000277462	178	465	287	665	987	720	265069	531992	347218	831786	100408	878673	4.83E-06	1269542808	up
	PRMT9	ENSG00000164169	817	1104	852	1761	2287	2114	674154	697341	626552	132885	129048	142577	4.77E-09	1051174246	up
	UBQLNL	ENSG00000175518	25	21	60	206	117	177	0.372933	0.248335	0.802895	228939	100652	180341	4.76E-06	2154683208	up
	ZNF582-AS1	ENSG00000267454	190	389	270	649	817	610	541265	983872	659681	207561	199787	164218	4.73E-07	1203853892	up
	AC016769.3	ENSG00000235349	7	26	16	56	104	61	0	0.427659	0.262522	201655	218862	0.765424	4.72E-05	2073256142	up
	DHRS2	ENSG00000100867	135	828	492	4119	4895	3898	201903	921518	673074	502448	503672	470662	4.71E-06	3112387444	up
	VCPKMT	ENSG00000100483	349	523	462	1115	1120	1016	590123	690957	705369	150071	142024	141114	4.68E-09	1197798209	up
	HIST1H4C	ENSG00000197061	9	10	17	83	169	50	0.793384	0.607519	0.878158	597389	971003	356867	4.68E-08	2901259249	up
	RNF150	ENSG00000170153	686	1463	1429	2366	5000	3859	213276	381857	409288	609427	130273	111879	4.67E-08	1539135723	up
	PHGDH	ENSG00000092621	11297	14034	12254	31953	27023	23796	167892	172191	168045	358706	272743	283131	4.65E-07	1051282539	up
	PPM1D	ENSG00000170836	1872	2798	2300	4788	6726	5378	155465	183051	176719	30404	413977	373615	4.64E-12	1172654331	up
	TDRD7	ENSG00000196116	4937	4371	8067	17262	13021	13128	300216	212887	453718	884989	547843	669077	4.63E-05	1219711097	up
	ZNF317	ENSG00000130803	2445	4269	3439	5189	9699	7514	174353	215199	194811	317408	448439	403833	4.61E-06	103186959	up
	GDAP1L1	ENSG00000124194	0	5	14	44	113	49	0	0.185653	0.420445	0.824222	166905	0.823536	4.61E-06	3288058321	up
	NSMCE2	ENSG00000156831	1294	1785	1437	4603	5515	4425	325843	349021	315542	95708	959839	895167	4.60E-23	1586360128	up
	CDC14A	ENSG00000079335	336	587	460	1583	2039	1831	30792	402653	382678	114897	137507	143177	4.59E-22	1889275955	up
	DNAH3	ENSG00000158486	8	35	21	103	123	95	0.0172044	0.0715661	0.0551003	0.206002	0.197144	0.175519	4.59E-07	2257826333	up
	ZNF705E	ENSG00000214534	3	15	8	38	72	74	0.0385654	0.127568	0.0836836	0.343978	0.452604	0.631841	4.59E-06	2744585208	up
	AC099489.1	ENSG00000188897	7	23	29	107	105	76	0.087831	0.48842	0.208209	0.415342	0.537582	0.280035	4.59E-06	2205650501	up
	TSPAN2	ENSG00000134198	79	193	102	494	491	458	0.587536	140445	0.887913	348945	387056	329099	4.57E-11	188882736	up
	ZNF14	ENSG00000105708	362	612	536	1084	1545	1350	305741	418132	429252	805499	941835	986219	4.57E-10	1299769694	up
	CHRM4	ENSG00000180720	65	129	122	245	632	414	116058	173138	18358	373721	746611	515994	4.51E-09	1902269714	up
	NHLH1	ENSG00000171786	40	108	89	178	331	186	0.43943	0.903854	0.931484	184098	258303	187115	4.49E-05	1443925535	up
	C1orf116	ENSG00000182795	35	76	47	71	471	193	0.26923	0.459536	0.223615	0.507832	215671	11223	4.46E-05	2050191667	up
	ZSCAN12	ENSG00000158691	1274	2113	1763	3138	5615	4689	722996	895106	881678	151068	218994	223048	4.45E-09	1275829786	up
	TMEM47	ENSG00000147027	14	13	19	227	265	197	0.129954	0.0943908	0.151083	135477	135109	112388	4.44E-27	3789289602	up
	SOCS2-AS1	ENSG00000246985	31	87	70	334	332	298	0.564591	146128	186962	501924	484593	476436	4.44E-13	2291002581	up
	HIST3H2A	ENSG00000181218	225	416	404	1310	1408	1002	742662	104572	127015	367301	322362	278359	4.44E-13	1742516928	up
	CARMIL2	ENSG00000159753	24	43	41	92	132	106	0.330557	0.441741	0.622553	0.88501	164923	163637	4.44E-05	1507880503	up
	BSN	ENSG00000164061	117	269	127	276	764	458	0.234488	0.446364	0.306849	0.466381	10938	0.861747	4.43E-05	1431406443	up
	AC139493.2	ENSG00000283235	3	9	13	105	104	109	0	0.587847	0.515247	338808	215863	267312	4.42E-13	3585594915	up
	RELB	ENSG00000104856	1916	3495	2803	11327	8521	7242	263821	375892	306144	160056	945114	100041	4.41E-11	1658931111	up
	JMY	ENSG00000152409	1278	2423	2565	3152	6329	5522	350827	51163	616645	748712	118805	126042	4.40E-05	1150249123	up
	SEPT7P2	ENSG00000214765	953	1698	1370	2580	3422	2625	114491	17.4	168986	28943	354853	311464	4.39E-07	1006505236	up
	ARRDC4	ENSG00000140450	389	869	642	1116	3008	1828	238228	433908	367946	635594	13135	983282	4.38E-07	1525382126	up
	PCDH1	ENSG00000156453	71	265	133	305	1046	522	0.707149	178486	11208	215841	572041	345496	4.37E-06	188557075	up
	GBA3	ENSG00000249948	14	28	10	54	103	69	0.250355	0.359687	0.148084	0.814796	0.958133	0.877286	4.37E-05	2013380059	up
	EPC1	ENSG00000120616	1230	2043	1726	3442	4026	3456	166539	214731	234706	407382	360388	358981	4.32E-08	1038225267	up
	SNHG11	ENSG00000174365	1149	1651	1444	3355	3359	2714	271618	31323	311961	733869	560164	532863	4.29E-08	1060435728	up
	DLL4	ENSG00000128917	15	77	49	174	303	174	0.211642	0.521725	0.412859	134828	194386	124369	4.29E-07	2123490443	up
	ERO1B	ENSG00000086619	279	422	409	683	1050	809	201967	22309	182418	317507	5384	338792	4.29E-07	1083648192	up
	LMO2	ENSG00000135363	35	38	62	249	247	180	0.783314	0.631905	12825	361436	309894	288892	4.27E-11	2213997525	up
	ZSWIM9	ENSG00000185453	691	1151	1029	2546	2627	2034	553005	719792	738306	174911	153461	13886	4.25E-09	124053851	up
	MMP19	ENSG00000123342	210	661	383	1213	1790	1135	229538	616121	420375	133997	156321	12175	4.19E-08	1646589952	up
	CDT1	ENSG00000167513	2961	4891	2907	10888	11106	9019	305375	356681	237708	783367	741827	695802	4.17E-12	1448274937	up
	C3orf20	ENSG00000131379	17	28	21	48	111	107	0.053314	0.116098	0.0620005	0.155598	0.404674	0.40221	4.17E-05	1898173172	up
	INTS4P1	ENSG00000164669	136	193	154	409	624	419	0.901106	104707	103228	275386	33212	270028	4.16E-11	1471621084	up
	AP5Z1	ENSG00000242802	3678	5556	5505	9858	17361	11891	360144	485504	533549	111031	167602	129616	4.14E-10	1285910505	up
	FBXO28	ENSG00000143756	1410	2140	1697	3174	4696	4057	129474	164534	13571	211119	335663	322271	4.14E-09	108180563	up
	KRT17	ENSG00000128422	96	156	266	1092	2155	1370	280643	356482	530986	176724	260298	209915	4.13E-22	3019851215	up
	TMEM79	ENSG00000163472	392	585	375	1281	1945	1420	640872	634453	578035	170516	200634	174653	4.12E-17	1672691543	up
	IFNL2	ENSG00000183709	0	1	4	84	66	60	0	0.0579177	0	215944	147613	167994	4.11E-10	5307320399	up
	SNX16	ENSG00000104497	356	572	471	668	1502	1013	835054	852651	909206	108334	225669	172714	4.11E-05	1059021978	up
	ZNF304	ENSG00000131845	738	1133	1024	1487	2856	2109	498783	615185	646767	873747	139752	125535	4.06E-06	1035527347	up
	SGIP1	ENSG00000118473	8	32	18	55	130	78	0.398083	0.673606	0.623983	118295	170812	0.762867	4.06E-05	2077697063	up
	DBP	ENSG00000105516	242	561	610	1997	2253	1775	533795	105776	11519	394519	344141	316343	4.03E-13	2009505854	up
	ASPRV1	ENSG00000244617	6	13	12	83	60	47	0.104797	0.14912	0.175336	0.962183	0.593537	0.686293	4.03E-06	254429654	up
	CPNE9	ENSG00000144550	13	64	36	387	460	344	0.536322	0.688759	0.308982	443021	406606	317597	4.02E-21	3335820652	up
	DHRS3	ENSG00000162496	137	261	389	2102	1234	1386	216987	377201	583744	263013	131332	17242	4.02E-13	2527777367	up
	USP44	ENSG00000136014	138	169	103	237	450	318	264395	14148	114189	273961	353753	277452	4.01E-05	1165761546	up
	SNTB1	ENSG00000172164	709	796	799	2203	2347	2106	687583	616834	732676	136824	170496	162796	3.99E-15	1425782861	up
	AL354710.2	ENSG00000239705	6	24	11	51	156	85	0.110705	0.599861	0.51193	120063	389651	249948	3.99E-07	2715952408	up
	GUCA1B	ENSG00000112599	99	143	109	260	508	350	231954	245452	223605	52206	788596	676315	3.98E-09	154682534	up
	BLM	ENSG00000197299	1052	1533	1108	4900	4725	4557	752146	831616	815215	474117	263927	302893	3.97E-23	1859517587	up
	FAM83G	ENSG00000188522	728	1104	1084	1488	3323	2312	417433	551422	580629	862123	145347	124309	3.96E-06	1157698171	up
	PHYHIPL	ENSG00000165443	149	277	151	550	638	499	18701	284048	191051	613425	576431	544964	3.95E-09	146565886	up
	MICU3	ENSG00000155970	116	184	221	348	516	511	178686	221857	486908	700464	757338	907726	3.94E-06	1296737355	up
	TCEAL5	ENSG00000204065	25	83	54	140	313	216	0.716518	169071	1487	300728	522565	466936	3.92E-07	1947544813	up
	AC005532.1	ENSG00000230825	9	32	16	62	176	105	0.184508	0.870211	0.341635	217714	440284	387194	3.92E-07	2477356334	up
	LRRN3	ENSG00000173114	652	864	896	1469	1914	1879	477929	520122	626361	100133	100057	120973	3.92E-07	1021953756	up
	NFKBIE	ENSG00000146232	1299	2197	1638	4131	4017	3623	167843	218478	182733	580491	38045	434887	3.91E-08	1120363401	up
	Z97055.2	ENSG00000261251	15	24	20	48	136	72	0.288773	0.473944	0.405482	0.978664	198482	151175	3.91E-05	1971675908	up
	RMND1	ENSG00000155906	1058	1611	1197	2868	3388	2680	146694	16597	143271	339903	327436	314074	3.86E-10	1114100726	up
	MYLIP	ENSG00000007944	941	1727	2127	3226	4775	4076	102298	143685	200927	294955	38417	370595	3.84E-06	1229979314	up
	C6orf222	ENSG00000189325	12	16	13	36	113	61	0.0707716	0.0747526	0.065819	0.260352	0.595851	0.397268	3.84E-05	2202628894	up
	AC018413.1	ENSG00000265778	13	22	28	88	87	94	0.326738	0.825205	0.644615	191708	261657	218655	3.81E-06	2007033378	up
	DDB2	ENSG00000134574	1357	1954	1723	4815	4181	3622	215388	252504	258837	744308	490818	506248	3.79E-09	1243374028	up
	GLI1	ENSG00000111087	43	79	91	374	408	388	153177	0.771996	141997	480142	565237	502533	3.78E-17	2368995975	up
	AC100800.1	ENSG00000187229	78	248	150	1052	1072	768	116096	257582	180538	11723	994513	875185	3.74E-17	2545412092	up
	PLCL1	ENSG00000115896	67	97	85	170	334	253	0.491711	0.662937	0.537384	110048	17675	160182	3.73E-07	1481495601	up
	MLLT3	ENSG00000171843	580	834	786	1702	1534	1429	627081	727107	867122	176643	124769	14049	3.73E-06	100044046	up
	LINC00174	ENSG00000179406	399	690	536	889	1519	1167	653788	917261	827965	956139	145482	123889	3.72E-06	1030614616	up
	SOBP	ENSG00000112320	36	70	58	142	145	175	0.223776	0.438823	0.483514	0.719853	0.566093	0.875396	3.71E-05	142066151	up
	MROH8	ENSG00000101353	97	156	141	766	674	720	12945	173992	178847	91422	669856	808412	3.69E-23	2378651092	up
	HLF	ENSG00000108924	197	483	462	2275	2306	2428	201172	364105	437166	152942	159199	176637	3.67E-21	2552315594	up
	AK9	ENSG00000155085	138	168	208	416	598	470	138083	221428	236367	409072	346926	476573	3.67E-09	1409874824	up
	SESN2	ENSG00000130766	2886	5994	6598	11323	16510	13895	192565	306443	389971	664213	777146	776195	3.65E-07	133524876	up
	YAF2	ENSG00000015153	724	1147	893	1993	2832	1921	201106	296067	272639	648838	71924	573306	3.64E-10	1180454537	up
	CNOT6LP1	ENSG00000230183	30	35	37	88	175	107	0.651134	0.692954	0.816559	161092	239205	204146	3.64E-06	1719629265	up
	AC078850.2	ENSG00000248802	8	23	24	87	169	129	0.404465	103403	129394	378035	418362	315958	3.62E-10	2697570699	up
	SPX	ENSG00000134548	30	148	70	273	563	285	0.483634	134171	0.903083	3224	467277	319133	3.62E-07	2092634817	up
	NAPSA	ENSG00000131400	9	29	16	74	84	66	0.171949	0.443422	0.307329	111713	107809	0.740398	3.60E-05	1980179885	up
	ZNF627	ENSG00000198551	832	1414	1235	4255	4988	4252	763354	108555	102521	322837	317533	324694	3.58E-23	1865332714	up
	NOL8	ENSG00000198000	3337	5541	4201	7067	13198	9860	246289	34697	316616	563877	888351	778671	3.58E-07	1091121828	up
	IL32	ENSG00000008517	422	1465	893	2144	2857	2138	135591	364936	21395	52952	568238	529744	3.58E-05	1298212622	up
	SNHG5	ENSG00000203875	1830	3006	2444	6675	6975	5373	871753	120027	114961	290383	234409	209026	3.56E-11	1298956108	up
	LINC01096	ENSG00000246095	43	57	49	123	157	122	0.923629	0.939167	100065	243063	246033	241202	3.55E-05	1323848048	up
	JAZF1-AS1	ENSG00000234336	4	17	7	57	86	46	0.0359094	0.343747	0.291831	0.993669	0.670161	0.432027	3.54E-06	2665179807	up
	WDR83	ENSG00000123154	221	303	244	621	781	462	143442	209781	209898	47262	519522	414338	3.53E-07	1167174713	up
	AC072061.1	ENSG00000259826	37	54	69	136	256	145	0.591002	0.644455	0.814583	170298	244884	183525	3.52E-06	1611472281	up
	AL592464.1	ENSG00000231630	1	0	0	32	27	25	0	0	0	0.436287	0	0.145997	3.52E-05	6193191224	up
	TRIB3	ENSG00000101255	7264	11956	11676	32305	35395	29248	691114	895963	100362	270301	252614	246268	3.46E-15	1559788122	up
	RHEBL1	ENSG00000167550	298	457	383	1006	1281	750	6066	664945	736665	172891	170637	120157	3.45E-09	1307812874	up
	LINC00303	ENSG00000176754	16	26	9	59	126	77	0.122208	0.279652	0.123083	0.653936	106632	0.746309	3.45E-06	2238989745	up
	TFEB	ENSG00000112561	733	898	837	1927	1923	1643	898474	871264	100245	231195	16815	175855	3.44E-08	105612087	up
	ASNS	ENSG00000070669	67	138	150	471	580	579	684736	786095	94233	331211	199.09	251509	3.43E-14	211276373	up
	ZFP69B	ENSG00000187801	247	425	289	674	987	851	305027	427248	348121	756582	885488	910832	3.43E-09	1290809624	up
	AL391244.3	ENSG00000272455	262	342	267	534	805	609	41659	4511	407233	789289	958893	827894	3.43E-07	1045929102	up
	AL138724.1	ENSG00000272269	95	149	95	397	405	256	765813	123959	832063	190762	189218	160637	3.41E-08	1550458453	up
	CCDC121	ENSG00000176714	126	216	247	491	585	503	293497	419735	357854	824246	895695	755192	3.40E-07	1327150414	up
	AC073878.2	ENSG00000261797	4	7	6	33	60	32	0	0	0.539333	121819	2688	122615	3.40E-05	2750502789	up
	PPP1R3C	ENSG00000119938	458	907	656	1097	1974	1304	473514	716637	622961	989866	137446	114614	3.39E-05	100717523	up
	ZNF416	ENSG00000083817	495	748	548	1326	1945	1466	50137	601216	523148	119925	139442	128986	3.38E-12	1296625245	up
	RAD9A	ENSG00000172613	1190	1431	1215	2531	3385	2431	196425	177215	182452	383987	378665	316011	3.35E-09	1004923579	up
	ZDHHC11B	ENSG00000206077	32	89	91	193	219	222	0.290634	0.862958	0.716658	173345	171735	21072	3.34E-05	1506941101	up
	IQUB	ENSG00000164675	14	28	41	86	227	127	0.156554	0.371431	0.382266	0.781418	170804	122723	3.33E-07	2262214689	up
	GPR19	ENSG00000183150	75	168	144	451	500	460	142463	247917	21057	719717	589044	74946	3.31E-11	1789237705	up
	AC010618.3	ENSG00000269439	79	123	96	223	410	207	304185	439975	383699	113663	142833	960759	3.31E-06	1365713804	up
	ZNF330	ENSG00000109445	2101	2973	2609	5822	6663	5400	353463	406737	412576	832798	841688	779027	3.28E-11	1120852808	up
	LRRC37B	ENSG00000185158	932	1307	1561	3392	3643	3391	141583	16712	226783	47323	371694	413655	3.28E-10	1360052332	up
	TET3	ENSG00000187605	1975	2474	2602	3548	6578	5833	444363	472908	536777	7516	111062	116183	3.28E-06	1054916472	up
	TAF1D	ENSG00000166012	2811	4643	3588	10133	13688	11041	598744	697562	658108	187616	192333	178783	3.27E-19	1562071176	up
	APLF	ENSG00000169621	178	325	259	749	762	678	136803	220223	157641	571951	389559	411573	3.27E-10	1443319191	up
	PCK2	ENSG00000100889	1716	2026	2360	6284	4383	4239	189919	185252	238478	656252	375467	422877	3.27E-06	1206523236	up
	NIM1K	ENSG00000177453	46	115	120	473	578	453	0.766586	130003	155392	490324	437667	489747	3.26E-15	2333134792	up
	AOC3	ENSG00000131471	60	156	109	223	455	319	0.6194	0.851172	0.647086	142189	223653	222727	3.24E-06	1515937585	up
	PDCD2L	ENSG00000126249	129	159	132	425	398	333	796241	812699	667797	18076	154373	162894	3.23E-08	1365951454	up
	NLRC4	ENSG00000091106	36	70	43	118	327	173	0.356435	0.418212	0.33145	0.825596	161727	110574	3.22E-07	1918233906	up
	AL450384.2	ENSG00000240291	35	47	46	132	156	142	0.852246	0.991347	0.9585	300105	285153	316798	3.21E-07	1646573278	up
	POLR2J4	ENSG00000214783	92	141	192	426	482	358	197494	185143	385966	610904	474717	645549	3.17E-07	1471004209	up
	C1orf162	ENSG00000143110	74	137	71	492	884	481	0.662128	178214	124226	720852	10214	533133	3.15E-21	2604306181	up
	HIST1H4H	ENSG00000158406	482	1091	739	2043	3562	2181	861863	178089	165551	368945	56459	39527	3.14E-11	1650564847	up
	GTF2IP13	ENSG00000272556	314	650	454	682	1642	1244	0.697059	115609	0.970894	145304	261338	237994	3.14E-05	1220833266	up
	ZBED9	ENSG00000232040	30	59	64	263	332	273	0.151912	0.240849	0.415753	122201	11559	118787	3.12E-16	2407101927	up
	NR5A2	ENSG00000116833	17	44	10	84	119	97	0.103479	0.225721	0.0594709	0.48682	0.751925	0.722407	3.12E-05	2008111182	up
	TRUB1	ENSG00000165832	1290	1675	1432	3287	3470	3558	123494	12392	129776	259809	235666	272979	3.11E-10	1138182458	up
	CCL5	ENSG00000271503	0	0	0	33	19	25	0	0	0	0.537678	0.239794	0.426878	3.11E-06	7051418982	up
	ZNF316	ENSG00000205903	4528	6391	5418	10227	14159	11312	27798	302635	306279	396761	573316	613874	3.09E-10	1020720536	up
	PRDM16	ENSG00000142611	11	17	39	106	130	129	0.229896	0.210502	0.764778	0.448563	0.96447	152285	3.09E-07	2339357887	up
	ZNF192P1	ENSG00000226314	111	166	134	339	559	304	178091	256151	250203	501013	805388	473058	3.05E-08	1424053012	up
	RAP1GAP	ENSG00000076864	50	210	159	412	571	446	0.311965	112286	10079	268284	269179	326301	3.05E-06	1702672071	up
	PMS2CL	ENSG00000187953	786	1581	1417	2035	3661	2727	13625	219324	237865	318364	515817	418854	3.04E-05	1048550483	up
	CACNA1H	ENSG00000196557	5	5	7	36	37	51	0.0399566	0.0722092	0.0298014	0.141837	0.11953	0.194258	3.03E-05	2772177812	up
	PLEKHF1	ENSG00000166289	212	402	359	738	1154	746	324984	512043	494631	951277	120946	977411	3.02E-08	1331077133	up
	STEAP1	ENSG00000164647	237	498	351	887	897	649	471052	791204	653487	161401	136535	119353	2.98E-05	1089147088	up
	TMEM151B	ENSG00000178233	9	51	39	120	139	133	0.265473	0.353322	0.519837	104275	103311	10151	2.98E-05	1929489614	up
	CEBPG	ENSG00000153879	4354	6775	7485	13333	15813	13006	24782	301067	386269	675564	645418	644852	2.97E-07	1080819871	up
	AC245100.4	ENSG00000231551	64	134	130	277	380	312	0.964493	116333	118831	345436	362976	328111	2.97E-07	1468486588	up
	MOV10L1	ENSG00000073146	219	403	319	813	1197	579	259941	327549	231455	804731	76197	61324	2.96E-07	1347907439	up
	RAB3A	ENSG00000105649	168	164	185	336	513	385	331236	232698	416929	569346	702412	632869	2.95E-06	1123425121	up
	AC006511.3	ENSG00000279865	15	24	29	64	179	89	0.505353	0.528509	0.873349	131346	297642	183743	2.95E-06	2134720839	up
	RENBP	ENSG00000102032	39	68	178	312	534	422	0.696088	156255	341884	712753	999576	9763	2.95E-06	2026263856	up
	AC107959.2	ENSG00000246130	13	61	28	393	307	356	0.170576	0.499339	0.253737	333821	227158	316607	2.94E-18	3344020926	up
	GFI1	ENSG00000162676	57	125	99	205	418	295	0.727317	0.962995	0.790525	189489	391522	276156	2.94E-07	159790289	up
	ZNF767P	ENSG00000133624	981	1141	773	2001	2525	2138	113383	898481	800506	176484	212474	205147	2.93E-08	1093966547	up
	RBMS3	ENSG00000144642	165	314	280	691	574	509	409571	570641	38878	929903	103742	919343	2.93E-05	1155446614	up
	HELQ	ENSG00000163312	1143	1579	1423	4098	4791	4423	117462	131613	133583	25275	292143	296777	2.92E-21	1586275983	up
	LIMS2	ENSG00000072163	68	82	100	264	189	230	115136	0.98299	105434	410633	220847	256767	2.92E-05	1369987614	up
	PLCG2	ENSG00000197943	4	12	12	88	154	145	0.11046	0.100982	0.545148	118372	0.994933	12278	2.91E-15	3686288449	up
	ZNF610	ENSG00000167554	326	593	520	1167	1924	1450	382346	610208	574289	125378	158732	144313	2.91E-12	1551773637	up
	NPIPB2	ENSG00000234719	61	62	86	211	372	193	197258	102959	212797	493244	576342	336815	2.91E-08	174408097	up
	ZNF433	ENSG00000197647	457	1111	671	2338	3228	2253	810699	157428	13181	308781	361952	315509	2.90E-12	1723635969	up
	CIART	ENSG00000159208	915	1565	1837	3889	4311	4185	176079	236625	311737	710824	579723	683333	2.88E-09	1432527905	up
	DSC3	ENSG00000134762	9	10	12	44	55	62	0.0558083	0.132359	0.157857	0.177326	0.212322	0.207546	2.88E-05	2272524319	up
	LINC01081	ENSG00000268754	3	20	18	71	143	57	0.0569959	0.157408	0.238308	0.862342	115599	0.647659	2.87E-06	2608935922	up
	ZNF155	ENSG00000204920	123	175	182	306	563	448	263458	355639	426749	903914	110565	100126	2.86E-07	1334899037	up
	HPX	ENSG00000110169	62	54	101	299	389	342	0.945375	104967	185496	457149	431403	540338	2.85E-12	2120785128	up
	TBC1D22B	ENSG00000065491	1414	2153	2080	3516	5162	4036	102039	119491	137662	216395	259563	243423	2.85E-08	1062217976	up
	AOC2	ENSG00000131480	110	270	149	359	932	550	111055	200133	118842	313581	607902	450729	2.83E-07	1685883806	up
	DLGAP3	ENSG00000116544	16	36	26	115	108	111	0.285131	0.234007	0.194836	0.815039	0.600002	0.86981	2.82E-07	2027250047	up
	THAP10	ENSG00000129028	186	364	247	573	1103	763	298715	539621	42225	802594	133194	105327	2.81E-09	1505068009	up
	ESRP1	ENSG00000104413	64	108	145	206	467	277	0.494498	0.942999	107849	158509	312026	252936	2.81E-05	1445061438	up
	RDH12	ENSG00000139988	19	28	30	199	224	136	0.327865	0.517198	0.63724	31334	300802	233128	2.80E-15	2752177194	up
	ATP6V1E2	ENSG00000250565	220	276	269	577	830	515	421947	458326	460428	112099	12664	928801	2.79E-08	1205721241	up
	AL359853.2	ENSG00000231966	12	35	26	65	309	124	0.228818	0.517992	0.420573	0.405796	244891	225165	2.78E-07	2613803451	up
	HEATR4	ENSG00000187105	14	27	48	85	169	173	0.130489	0.191064	0.555347	110357	145216	110425	2.78E-06	2148569225	up
	SCN11A	ENSG00000168356	8	17	11	84	90	112	0.0413015	0.0722848	0.0537864	0.348899	0.290204	0.361001	2.77E-10	2914576337	up
	C19orf38	ENSG00000214212	18	86	35	258	439	235	0.359519	182056	0.853117	511616	687357	45603	2.76E-11	2669233264	up
	SPATA25	ENSG00000149634	98	137	105	261	681	436	300981	341461	265691	717331	134358	111015	2.76E-10	1878741323	up
	NXPH4	ENSG00000182379	204	266	230	531	812	549	324352	323178	322946	74653	89762	699852	2.76E-10	1313855331	up
	AC015689.1	ENSG00000254480	5	11	8	64	55	45	0.288084	0.774602	0.797813	362418	319561	259472	2.76E-06	2695195792	up
	SYT14	ENSG00000143469	416	699	669	879	1779	1447	219857	263032	315954	421473	688629	635891	2.76E-05	1086455586	up
	IRF1	ENSG00000125347	3126	3956	5742	13228	8991	9414	542287	605208	999133	188.78	125998	153107	2.76E-05	1223782486	up
	GTF2H1	ENSG00000110768	4117	5592	4905	8551	12948	10430	434944	439684	458143	699147	902525	866262	2.75E-09	101453431	up
	CCDC81	ENSG00000149201	50	64	61	258	258	239	0.685467	0.657255	0.946683	284505	287787	360678	2.74E-13	2013771464	up
	UAP1L1	ENSG00000197355	3172	4354	5738	11563	12529	13424	216127	234829	351829	70941	610186	787697	2.74E-09	1405382378	up
	ZMYM5	ENSG00000132950	987	1554	1428	2870	3912	3561	91005	112749	111195	194363	267541	261792	2.71E-11	1283576219	up
	FBXO39	ENSG00000177294	62	50	154	338	314	296	0.841472	0.72726	182141	411264	345397	397801	2.71E-05	1717261209	up
	LURAP1L-AS1	ENSG00000235448	148	279	297	576	865	664	196238	221688	299429	719097	89766	869092	2.69E-08	1435589021	up
	ARHGAP45	ENSG00000180448	549	998	828	1627	2151	1861	639407	805254	748596	162849	137842	138527	2.68E-08	1156674558	up
	ZNF230	ENSG00000159882	236	395	234	526	864	636	183175	256625	143223	343625	480046	435252	2.68E-06	1123160445	up
	RUNDC3A	ENSG00000108309	23	69	55	122	267	170	0.918375	143343	0.52709	217348	371234	274826	2.67E-06	1818456511	up
	SCN3A	ENSG00000153253	15	12	29	196	473	379	0.374251	0.0540234	0.133974	0.831997	134032	150413	2.65E-25	4075274268	up
	PTEN	ENSG00000171862	1122	1724	1693	3751	5106	4416	118707	171824	161455	329802	522481	500935	2.65E-14	1446128283	up
	TRA2A	ENSG00000164548	3672	5168	4896	9297	11658	10080	600215	681599	792677	154393	171142	163324	2.65E-10	1074241785	up
	SNHG17	ENSG00000196756	3849	5829	4303	10722	13935	9959	966696	121623	104.56	276327	292608	247012	2.64E-12	1205918827	up
	ZNF844	ENSG00000223547	1893	4199	3712	6005	12786	9555	991541	179248	176076	234648	562399	476532	2.64E-07	1423644324	up
	DNAJB9	ENSG00000128590	531	1051	1120	1455	2952	2290	645605	108774	10744	15698	251169	218493	2.64E-05	119618824	up
	OLFM5P	ENSG00000224295	6	9	25	66	90	94	0.0964086	0.101356	0.26876	0.736227	0.786996	0.81769	2.63E-06	2532837788	up
	RERG	ENSG00000134533	3	17	4	69	127	56	0.0222554	0.311047	0.0796288	0.960209	14145	0.669267	2.62E-08	3298014366	up
	DNAJC27	ENSG00000115137	375	567	541	796	1469	1163	258652	356278	314057	508455	998328	915666	2.62E-06	1090951995	up
	BRAF	ENSG00000157764	1239	2035	1852	2915	4887	4087	550311	829331	888129	940898	204324	162006	2.61E-07	11062071	up
	BEX2	ENSG00000133134	651	1088	1294	2962	4547	3012	200594	263275	357066	744615	963215	763846	2.60E-12	1678691281	up
	LINC01239	ENSG00000234840	36	66	64	146	177	138	0.347783	0.580597	0.574769	131319	128656	10722	2.60E-05	1377213389	up
	CCDC62	ENSG00000130783	54	118	64	132	461	236	0.469819	0.90226	0.583448	119196	288538	186956	2.59E-05	167707388	up
	PKP2	ENSG00000057294	475	456	390	1085	946	846	337309	36194	324103	788784	440769	543155	2.59E-05	1020606764	up
	KIF6	ENSG00000164627	112	181	400	998	739	886	163529	189443	521516	119957	697325	105147	2.58E-06	184177603	up
	PARP8	ENSG00000151883	64	187	147	466	528	468	128111	222086	196608	531599	437026	489482	2.57E-09	1809569533	up
	HMGN2P40	ENSG00000260602	0	3	1	56	61	45	0	0.433625	0	305085	406923	27285	2.57E-08	5254210625	up
	AC092117.1	ENSG00000276791	30	39	29	67	187	110	0.355069	0.324413	0.292088	0.590113	125431	0.857626	2.56E-05	1745917155	up
	EPB41L4B	ENSG00000095203	232	458	299	671	929	578	141695	192442	148172	320788	334794	27607	2.54E-05	1043145921	up
	ZNF720	ENSG00000197302	528	785	700	1170	1969	1382	933664	135028	10775	17215	317084	22169	2.53E-07	1049016974	up
	HERPUD1	ENSG00000051108	4845	8302	9011	14168	18719	16858	798544	103.72	132274	205341	224586	250.58	2.52E-06	1070581205	up
	ULBP1	ENSG00000111981	325	551	772	1902	2380	2381	264657	357453	583015	132709	127606	154695	2.49E-12	191952795	up
	CENPU	ENSG00000151725	6482	8258	5558	14722	16995	14535	885075	930481	679404	176032	167966	184231	2.49E-09	1088848564	up
	EFNA3	ENSG00000143590	28	59	57	126	206	148	132395	236934	333414	473886	660216	682463	2.49E-06	1629804972	up
	AC131009.2	ENSG00000256955	27	52	35	152	120	128	0.911422	109568	0.909849	427569	273626	266793	2.48E-06	1746208886	up
	CGRRF1	ENSG00000100532	464	639	552	1295	1634	1405	139336	141604	135643	35448	306341	357031	2.47E-13	1286463727	up
	CMTM2	ENSG00000140932	9	10	9	40	58	55	0.142755	0.313598	0.212724	158818	179879	163506	2.46E-05	2337566864	up
	MED26	ENSG00000105085	355	682	509	882	1530	961	805568	102275	871705	127507	217759	182341	2.44E-05	1016239327	up
	KANSL1L	ENSG00000144445	480	713	534	1181	2125	1618	396522	451375	410227	910792	109666	104728	2.43E-11	1395646691	up
	GZF1	ENSG00000125812	3188	5238	3967	7027	10322	9779	22918	324203	322038	454597	605068	64033	2.43E-07	1035663037	up
	IRF5	ENSG00000128604	403	930	731	1509	1835	1566	411816	812598	789271	133622	148359	159327	2.43E-06	1173724209	up
	CSAG3	ENSG00000268916	3	0	3	60	62	39	0	0	0.0628587	0.691641	0.734162	0.678988	2.41E-08	4615955222	up
	CFAP54	ENSG00000188596	71	99	118	965	825	694	0.46723	0.542472	0.72127	396243	308694	318121	2.40E-31	3019942893	up
	NKD1	ENSG00000140807	11	27	33	83	105	89	0.0709526	0.206136	0.0702556	0.273013	0.451135	101333	2.40E-05	1870260634	up
	CASS4	ENSG00000087589	68	130	128	375	864	551	0.807008	115932	127971	367408	645534	520551	2.39E-15	2329349586	up
	AC083973.1	ENSG00000253408	8	20	11	65	97	69	0.514699	0.963223	0.437065	300937	382568	29229	2.37E-07	246965016	up
	NTMT1	ENSG00000148335	2086	2970	2005	4657	6442	4465	991193	110445	942192	228141	249065	203617	2.35E-08	1032171444	up
	ASXL3	ENSG00000141431	18	37	19	64	153	83	0.0508965	0.254597	0.0841642	0.269741	0.479831	0.307739	2.35E-05	1895237401	up
	KCNS3	ENSG00000170745	31	57	33	127	298	198	0.46001	0.67638	0.599211	142882	261954	217697	2.32E-10	2242655612	up
	SYDE2	ENSG00000097096	272	464	399	651	1388	1076	152509	200842	197159	266377	475436	48126	2.32E-07	1339076222	up
	UGDH-AS1	ENSG00000249348	101	66	77	170	306	237	0.887513	0.553989	0.910429	149549	230329	19661	2.32E-05	1392668629	up
	ADM2	ENSG00000128165	76	162	189	543	540	409	0.646104	0.860524	151118	315701	259528	228488	2.31E-08	1721412297	up
	KRT18P17	ENSG00000213943	18	32	13	83	284	146	0.341364	0.567388	0.211338	156247	400595	25496	2.29E-10	2881017379	up
	RCOR2	ENSG00000167771	65	111	126	244	258	278	0.673964	0.817093	115681	240183	171947	240573	2.29E-05	1283600876	up
	EMC9	ENSG00000100908	932	1284	1105	4428	4457	3593	378658	383947	38602	143693	119071	117003	2.28E-23	1816465027	up
	HRK	ENSG00000135116	87	153	171	388	859	625	0.576631	0.855686	0.689382	213387	506722	311589	2.28E-12	2061946292	up
	ANKRD31	ENSG00000145700	35	84	74	220	281	239	0.172088	0.284325	0.300166	0.800155	0.762748	0.901067	2.28E-09	1852784894	up
	ZNF461	ENSG00000197808	397	696	673	990	2116	1416	603399	87509	123273	129332	238286	184969	2.28E-06	1232206793	up
	KCNN1	ENSG00000105642	6	19	31	398	303	325	0.110401	0.174995	0.237889	403052	259919	223483	2.27E-25	4126913237	up
	AC016134.1	ENSG00000260926	7	6	2	59	63	41	0.795781	0.453094	0.183109	332356	19799	195861	2.27E-07	3329099095	up
	RP9	ENSG00000164610	1415	2059	1374	3934	3999	3571	307509	337616	271113	752332	624279	66409	2.25E-09	1161587292	up
	LPXN	ENSG00000110031	376	608	517	1286	1067	1068	407757	554013	541634	132005	873864	107009	2.25E-06	111653024	up
	AP001528.2	ENSG00000255471	9	9	7	43	84	47	0.213308	0.167753	0.11882	0.975515	159983	137171	2.24E-06	2656721444	up
	PVT1	ENSG00000249859	1449	2380	2206	5683	4662	4325	607165	781548	928482	204.51	160544	174629	2.23E-07	120877855	up
	KLRG2	ENSG00000188883	8	13	7	38	96	58	0.0207511	0.196848	0.0771567	0.400139	0.857648	0.620076	2.23E-06	2643970545	up
	FAM117A	ENSG00000121104	824	1098	1008	2942	3412	2424	101382	108934	11582	304412	316067	269776	2.22E-16	1477063711	up
	TIMM44	ENSG00000104980	3883	5391	4460	13119	11863	9935	480773	567834	566877	151026	111668	114778	2.22E-10	1260309573	up
	CNOT4	ENSG00000080802	1663	3060	2718	4736	5886	5232	133433	194493	199194	325147	341251	359394	2.22E-06	1003889374	up
	MOXD1	ENSG00000079931	302	470	433	944	885	840	298012	330178	332492	685635	596897	585672	2.22E-06	1065204483	up
	NXPH3	ENSG00000182575	19	57	24	122	142	128	0.25119	0.565988	0.259409	105706	108656	122538	2.21E-06	1908212986	up
	CCM2L	ENSG00000101331	4	19	14	47	94	60	0.0755166	0.39475	0.334829	0.988898	176093	145196	2.21E-05	2340184285	up
	COLQ	ENSG00000206561	70	101	129	314	239	265	0.845481	0.714694	158752	38804	221494	265644	2.21E-05	1368998092	up
	FBXL6	ENSG00000182325	1082	1589	964	3560	3890	2800	207282	235228	175774	57198	503906	425513	2.20E-11	1403116122	up
	MCOLN1	ENSG00000090674	839	1219	906	2366	4102	2621	138534	15997	158825	415925	600283	479592	2.19E-14	1494975785	up
	NTN4	ENSG00000074527	725	840	761	1856	1766	1507	551345	52196	606305	124495	114623	107949	2.19E-07	1042488837	up
	ZNF165	ENSG00000197279	63	139	138	277	526	323	0.825182	142941	153401	311004	455396	349597	2.19E-07	1611619709	up
	DNAH6	ENSG00000115423	13	29	28	73	88	113	0.091635	0.0881099	0.0696752	0.17539	0.264225	0.323942	2.19E-05	1890721604	up
	TECTA	ENSG00000109927	103	118	131	183	465	348	0.662974	0.493237	0.563417	0.983305	1567	149248	2.19E-05	135602879	up
	FAM186B	ENSG00000135436	15	26	25	58	109	91	0.362206	0.485826	0.599521	0.996966	176427	169541	2.17E-05	1853171796	up
	TBX4	ENSG00000121075	56	127	120	284	425	430	0.693473	128874	0.929006	251598	326832	379208	2.16E-09	1822787588	up
	LBX2-AS1	ENSG00000257702	32	123	77	191	479	347	0.793602	176653	149058	268463	525061	459967	2.16E-07	2039292062	up
	PPFIA2	ENSG00000139220	62	106	117	252	312	278	101553	190182	223043	388474	321898	383733	2.16E-07	1466110571	up
	IFNL3P1	ENSG00000268510	1	4	4	60	79	44	0	0.0980083	0.11743	0.572664	0.777879	0.458496	2.15E-09	4236577912	up
	GRPEL2	ENSG00000164284	1699	2500	2441	3972	4835	5367	161635	19375	202119	251472	424018	447716	2.14E-06	1002978685	up
	TUBBP6	ENSG00000235207	5	9	6	30	76	39	0.180996	0.171072	0.134479	0.464072	0.969664	0.690627	2.14E-05	2718799134	up
	RRAGC	ENSG00000116954	1910	2776	2871	5359	6757	5568	386899	412604	522241	807437	974289	967866	2.13E-09	1123357709	up
	CCND2	ENSG00000118971	5	37	20	121	126	115	0.0571604	0.175709	0.110651	0.580269	0.582983	0.952048	2.13E-07	2500988405	up
	PKD1L3	ENSG00000277481	28	28	30	63	191	139	0.0167306	0.00671424	0.0314513	0.0384843	0.0966792	0.100226	2.11E-06	2038375741	up
	CCDC73	ENSG00000186714	5	25	12	66	186	71	0.0639254	0.164102	0.0760425	0.380526	0.814509	0.446544	2.10E-07	2820665298	up
	SLC5A2	ENSG00000140675	8	5	5	37	107	50	0.171794	0.0909583	0.147582	116824	16287	159437	2.10E-07	3252205381	up
	AC015909.2	ENSG00000253730	19	14	17	90	86	66	100427	0.949947	0.619174	362999	247603	211612	2.08E-06	2159367585	up
	IGFBP6	ENSG00000167779	362	675	619	1661	2149	1270	121274	182734	202088	554522	578144	402878	2.07E-10	1515346497	up
	RGS5	ENSG00000143248	85	133	102	257	421	310	278155	397118	327706	714945	102224	794789	2.07E-09	1514236099	up
	AC112484.1	ENSG00000231305	83	160	123	248	345	271	163403	205547	185984	392617	45536	531525	2.06E-05	114408135	up
	CEBPB-AS1	ENSG00000277449	64	128	80	230	547	272	0.682402	0.755033	0.655238	184723	302993	189195	2.05E-08	1818638851	up
	KDM6A	ENSG00000147050	4010	5866	5829	11528	16035	14240	242363	288289	333781	782922	770806	791303	2.03E-12	1308185144	up
	WDR78	ENSG00000152763	170	304	193	745	1009	788	200077	420011	251428	615952	102987	854848	2.02E-17	1836831509	up
	HIST2H2BC	ENSG00000261716	648	1126	1083	2079	2843	2091	374928	498995	554908	112124	11683	103406	2.00E-08	1193759249	up
	ERICH2	ENSG00000204334	30	45	49	134	180	108	0.976041	12883	207774	433232	522806	379432	2.00E-06	1651352315	up
	AL353743.1	ENSG00000165121	625	1152	948	1705	2873	1961	697934	10525	106957	182065	241796	195126	1.99E-07	115438021	up
	CARMIL3	ENSG00000186648	20	38	28	134	95	112	0.151997	0.197604	0.185227	0.644899	0.382622	0.639938	1.99E-06	1926566516	up
	PPFIBP2	ENSG00000166387	75	230	145	325	618	468	176052	266076	220192	414126	603821	556631	1.99E-06	1562417724	up
	ATP1A1-AS1	ENSG00000203865	40	76	79	166	212	162	111768	194771	247161	505385	650412	475875	1.99E-05	1370824374	up
	STOX1	ENSG00000165730	103	219	167	571	591	462	0.960203	145673	120903	438706	361131	33204	1.97E-10	1654591081	up
	C6orf52	ENSG00000137434	51	67	67	180	228	140	188335	251587	267488	483814	495992	435663	1.97E-06	1451163998	up
	IFNL1	ENSG00000182393	1	4	7	308	211	216	0.0612301	0.09589	0.340721	865231	548243	638439	1.96E-26	5865223032	up
	ATP4A	ENSG00000105675	3	3	1	179	236	151	0	0.0384122	0.0224407	150447	124162	115806	1.96E-21	622033476	up
	ZCCHC8	ENSG00000033030	2893	4302	3502	7751	9072	8208	247082	27903	288451	614365	526458	596686	1.95E-11	1133966899	up
	NSUN6	ENSG00000241058	368	514	444	847	1401	1060	414113	507961	505569	963044	106457	963318	1.93E-09	1201506555	up
	ZBTB2	ENSG00000181472	1468	2543	2104	3764	5873	4891	111349	150081	149754	257421	323703	325513	1.93E-08	1147679513	up
	GOT1	ENSG00000120053	4529	5830	4547	10753	12735	9251	523122	540897	44385	122172	114884	100423	1.92E-09	1028976862	up
	FAM227A	ENSG00000184949	72	186	99	277	330	341	0.723853	122962	0.494704	156215	182821	27616	1.92E-05	1347290164	up
	ZNF57	ENSG00000171970	214	401	249	682	991	644	411319	565481	487465	103595	125343	100022	1.91E-08	1324378258	up
	HCLS1	ENSG00000180353	26	53	33	103	289	134	0.326984	0.620238	0.293279	119338	214535	127025	1.91E-07	2092746714	up
	ADCY10	ENSG00000143199	62	84	51	150	229	154	0.534946	0.66073	0.520621	0.899823	140228	0.892341	1.90E-05	1320521018	up
	ELAVL3	ENSG00000196361	364	735	396	1311	1857	1338	461492	792958	678526	727306	165266	133011	1.89E-10	1504038084	up
	GRB14	ENSG00000115290	35	31	40	101	126	112	0.828002	0.536715	0.396069	185155	132384	160404	1.89E-05	1557438905	up
	RARA	ENSG00000131759	821	1258	1325	2447	3540	2633	956967	123968	154911	227938	289157	254778	1.88E-09	1229725013	up
	C9orf152	ENSG00000188959	54	87	52	107	363	209	0.594519	0.93427	0.506703	0.940875	274728	180324	1.88E-05	1670689057	up
	AJUBA	ENSG00000129474	8375	9711	7643	23429	18776	18130	57112	527205	472462	148197	101835	113195	1.87E-07	1143805172	up
	GPR37L1	ENSG00000170075	7	17	14	70	97	63	0.0327918	0.0623911	0.0670655	0.289758	0.291123	0.238815	1.86E-07	2495336759	up
	AC139491.2	ENSG00000248596	4	34	11	139	96	114	0.133646	0.506145	0.488565	415926	189563	25462	1.86E-07	2825403581	up
	NKPD1	ENSG00000179846	6	10	19	48	91	57	0.0706314	0.0738352	0.0962906	0.342836	0.467499	0.348713	1.86E-05	2351620665	up
	FGF2	ENSG00000138685	2702	3345	3040	11084	13857	13758	201809	246348	246162	65713	106396	847665	1.85E-32	1987432354	up
	FZD4	ENSG00000174804	278	322	334	1165	1625	1268	123826	127193	142672	440826	51831	49509	1.84E-27	2000011953	up
	AL645728.1	ENSG00000215014	44	81	66	146	296	214	0.753457	0.875978	0.769384	192721	342456	259961	1.83E-07	1663869066	up
	ZNF581	ENSG00000171425	703	1177	719	2249	2537	1871	15.67	192379	149221	440236	399544	355116	1.82E-09	1270035824	up
	ESRRB	ENSG00000119715	21	17	24	75	94	74	0.195371	0.215448	0.339327	0.773764	0.573177	0.547453	1.81E-05	1845642095	up
	JDP2	ENSG00000140044	262	461	561	1218	1006	961	532184	711429	100216	178544	125179	145511	1.81E-05	1235496898	up
	SNHG12	ENSG00000197989	2931	4682	3656	13045	14106	9661	835513	111918	103629	406215	354188	292705	1.80E-16	1615773351	up
	MATN1-AS1	ENSG00000186056	198	333	231	786	788	873	481866	762368	640302	240501	190588	218067	1.80E-12	1609118097	up
	HIC1	ENSG00000177374	30	51	49	106	185	114	0.310364	0.532702	0.481732	0.779823	13208	120042	1.80E-05	1518600319	up
	TMEM200C	ENSG00000206432	368	522	402	913	1054	824	302653	351072	285664	596802	628864	556957	1.79E-07	1012714579	up
	GRB7	ENSG00000141738	13	34	29	97	119	95	0.224248	0.433432	0.670191	122403	154689	120641	1.79E-06	1945902534	up
	ZIM2-AS1	ENSG00000269793	2	22	18	53	136	108	0.107357	0.424264	0.339288	112836	184194	171862	1.78E-06	2730116607	up
	TSLP	ENSG00000145777	34	167	169	344	658	399	0.582645	151656	164022	503685	589009	415098	1.78E-05	1825331382	up
	CDH8	ENSG00000150394	50	152	59	295	302	216	132718	268871	0.496864	322612	26965	371702	1.78E-05	1586955603	up
	ZNF585A	ENSG00000196967	561	1087	653	1263	1987	1722	692313	848003	820525	896553	111483	104345	1.78E-05	1022275948	up
	FNDC5	ENSG00000160097	93	122	67	263	460	223	14306	144564	191451	361404	503859	326932	1.77E-07	161365344	up
	AC138356.1	ENSG00000183154	3	8	7	53	69	34	0.06586	0.104097	0.122432	0.765845	0.722506	0.439283	1.75E-06	3007809828	up
	HIST2H4A	ENSG00000270882	7	11	15	104	77	42	0.122188	0.178559	0.293741	147481	110318	0.804742	1.75E-06	266807193	up
	CEP95	ENSG00000258890	2710	4206	3669	8336	9942	8230	425472	52855	604901	121.89	125192	134352	1.74E-12	1229461726	up
	FAM209B	ENSG00000213714	8	23	14	91	104	65	0.160558	0.375494	0.743738	320947	288734	188961	1.74E-07	2445628784	up
	TTBK1	ENSG00000146216	129	253	100	311	746	538	0.581586	0.895223	0.484964	123472	224171	189809	1.74E-06	1619616172	up
	CFAP57	ENSG00000243710	3	19	17	92	193	112	0.3	0.400389	0.241077	0.660311	0.832121	0.572002	1.72E-11	3236643682	up
	SYP	ENSG00000102003	83	123	89	287	297	274	105845	154742	140056	382536	35908	365701	1.72E-08	1451879572	up
	RASD2	ENSG00000100302	23	29	23	162	294	190	0.168663	0.246601	0.18098	127647	167822	129898	1.71E-19	2976930366	up
	FLCN	ENSG00000154803	1103	1729	2140	3930	5938	4528	141344	171918	23.85	377078	572857	489242	1.70E-09	1420298684	up
	AC078850.1	ENSG00000248187	8	20	21	233	368	248	0.144745	0.228404	0.430355	305246	403246	33947	1.68E-30	400196257	up
	PDGFA	ENSG00000197461	252	329	238	636	1001	648	246267	340404	280745	613752	786758	788283	1.68E-10	1358733305	up
	CHAC1	ENSG00000128965	981	1965	1632	8903	6049	6561	161466	247168	250468	125069	715059	912988	1.67E-16	218247114	up
	Z97634.1	ENSG00000236829	5	16	21	71	120	79	0.212773	0.528855	0.504254	162602	26731	166277	1.66E-07	2572397517	up
	AC010884.1	ENSG00000224509	3	5	7	31	69	32	0.178249	0.0693355	0	0.808538	10912	145132	1.66E-05	2990805773	up
	SHBG	ENSG00000129214	28	49	22	118	135	89	0.728681	0.941603	0.717156	340629	318423	261681	1.66E-05	1697992034	up
	YARS	ENSG00000134684	12593	18781	16325	45417	47647	40781	125252	152762	162181	341851	352664	369502	1.65E-15	1398861309	up
	ZNF77	ENSG00000175691	413	470	416	845	1378	1027	502443	464033	462991	943688	128282	114471	1.64E-09	1195929	up
	SLC6A9	ENSG00000196517	1086	1575	1909	5183	4143	3773	853444	98054	143437	349313	238885	283088	1.64E-08	1437832501	up
	WWTR1-AS1	ENSG00000241313	38	63	64	189	251	179	151067	150729	174235	445217	444655	318922	1.63E-09	1800747968	up
	RBAK	ENSG00000146587	2369	3628	3133	5197	7567	7264	939247	116523	114571	177402	22283	258622	1.63E-07	1034113141	up
	EXTL1	ENSG00000158008	7	10	8	36	72	70	0.0328181	0.0260034	0.0101743	0.0603742	0.100476	0.149378	1.63E-06	2717198912	up
	SP8	ENSG00000164651	29	45	41	243	375	383	0.289088	0.320544	0.378369	182015	226497	253862	1.61E-24	3018791579	up
	MAPK8IP2	ENSG00000008735	417	654	860	2422	2531	2413	293638	338303	526243	14104	111458	132236	1.61E-13	1840221985	up
	ZNF44	ENSG00000197857	963	2251	1507	3976	5481	4032	938616	176617	12478	340812	393217	330103	1.59E-09	1432523683	up
	ZNF721	ENSG00000182903	2323	3477	2892	4955	8607	6812	261838	296004	307824	354603	568217	536617	1.59E-08	1115066469	up
	ZNF268	ENSG00000090612	1531	2114	1934	4200	4752	4663	12987	148298	16271	230976	289274	308633	1.58E-11	1193162092	up
	SLC16A6	ENSG00000108932	85	249	146	491	886	740	121254	312986	190379	424325	84643	702754	1.58E-11	2060215739	up
	RAB33A	ENSG00000134594	37	82	97	283	355	296	0.927874	155212	215409	562658	600655	554849	1.58E-10	2019461411	up
	ZSCAN16	ENSG00000196812	342	659	605	1236	1316	1187	898808	124907	13.96	278853	23883	268103	1.58E-06	1139457307	up
	HIST1H2AC	ENSG00000180573	922	2111	1998	4097	5326	4157	125848	228757	252607	495844	526886	504855	1.57E-07	1346470777	up
	GRHL1	ENSG00000134317	127	253	216	399	518	446	156481	201668	184624	369098	4646	414064	1.57E-05	1104573338	up
	ZNF425	ENSG00000204947	270	381	331	1105	1604	1183	22617	299782	252639	798764	988317	847688	1.55E-24	1874243145	up
	ZNF140	ENSG00000196387	1211	2033	1386	3352	4828	3852	197346	255472	202967	511993	591457	532616	1.55E-11	1280532304	up
	C5orf34	ENSG00000172244	564	784	431	1377	1672	1491	659903	874569	536959	180423	172993	183367	1.55E-08	1257837741	up
	NUDT17	ENSG00000186364	195	313	271	500	885	516	355845	593111	512588	117412	119272	98072	1.55E-06	1163953036	up
	ISCA1P4	ENSG00000259405	12	16	20	124	93	99	0	0	0	431698	169695	903806	1.54E-09	2637166965	up
	C12orf29	ENSG00000133641	930	1405	907	2367	3207	2454	241678	303753	234208	540971	651679	573617	1.53E-10	1207575658	up
	SH3GL2	ENSG00000107295	278	457	274	746	952	565	281001	368188	267782	674466	696093	512939	1.53E-05	1065164237	up
	GALR2	ENSG00000182687	7	27	14	115	239	97	0.211384	0.527339	0.327204	200044	337028	169643	1.52E-11	3115887177	up
	LINC00337	ENSG00000225077	18	36	19	71	118	87	0.270464	0.559471	0.32022	114605	147752	106503	1.52E-05	181703579	up
	GPR61	ENSG00000156097	16	25	32	67	146	85	0.389525	0.709301	0.954653	104669	145346	0.762907	1.52E-05	1891142059	up
	TRMT13	ENSG00000122435	1025	1379	988	2960	3457	3209	12872	15442	137402	318261	357012	40313	1.51E-15	1409388972	up
	DNAH12	ENSG00000174844	57	131	115	307	748	521	0.221935	0.435392	111835	222161	272077	183713	1.51E-12	2261265435	up
	TTC21A	ENSG00000168026	152	263	338	885	1104	933	21411	250099	272434	965099	932267	810295	1.50E-12	1856929228	up
	CFAP69	ENSG00000105792	86	163	154	430	616	440	187367	243739	186943	45174	682492	391041	1.50E-12	1779327008	up
	GADD45B	ENSG00000099860	3180	5267	4804	12019	13694	8847	572292	711329	782488	189383	178262	140.44	1.49E-09	1285962339	up
	PPP1R13B	ENSG00000088808	692	1159	804	1646	2684	1778	623827	612028	641753	117059	171733	130945	1.49E-07	1092434229	up
	LSMEM1	ENSG00000181016	209	404	258	1011	1892	1085	43687	682806	446036	133296	229149	174026	1.48E-17	2081152686	up
	RPL12P14	ENSG00000224321	24	85	44	269	311	237	0.394363	0.810194	0.850039	497187	321831	402966	1.48E-11	235389503	up
	LRP5L	ENSG00000100068	283	497	367	816	1081	874	367349	561207	417203	116611	116463	115457	1.48E-08	117906061	up
	HSCB	ENSG00000100209	378	419	412	1314	1218	1083	124886	133657	136169	431755	347228	356787	1.47E-12	1481309749	up
	SLC2A13	ENSG00000151229	306	474	363	634	1109	842	1853	194767	212486	439364	569188	43979	1.47E-06	1064132559	up
	WASH2P	ENSG00000146556	369	468	392	1004	939	768	289602	271117	305809	772828	510935	570664	1.47E-06	1047877126	up
	KCNQ5	ENSG00000185760	156	248	150	469	652	522	0.968359	126562	105536	332796	238431	222556	1.45E-10	1469850567	up
	ARNTL	ENSG00000133794	1017	2008	1735	3448	4351	3488	11235	160654	169073	357769	33877	355685	1.44E-07	1157778496	up
	HOXC13	ENSG00000123364	0	8	9	39	105	46	0	0.0885944	0.13885	0.531624	109733	0.628447	1.44E-06	3352180386	up
	AC022784.1	ENSG00000248538	11	76	68	267	407	321	0.375376	223224	302722	853704	110218	109341	1.43E-09	2611285847	up
	MAK	ENSG00000111837	76	73	105	323	308	245	0.367597	0.311922	0.699597	172422	148266	13474	1.43E-08	167560786	up
	NFKBIB	ENSG00000104825	1753	2741	2186	4191	6294	4341	255436	300247	279951	531675	637933	514586	1.42E-08	1040548029	up
	VPS37D	ENSG00000176428	148	275	196	455	563	378	260363	358354	303735	681703	679635	57496	1.42E-05	10799926	up
	HIP1R	ENSG00000130787	1989	2540	2567	7147	8448	6552	176273	141822	172032	591689	463099	46228	1.41E-19	1534449806	up
	LVRN	ENSG00000172901	57	73	84	292	382	409	0.501588	0.439765	0.574526	170458	23423	226641	1.41E-16	2235959644	up
	CAMSAP3	ENSG00000076826	19	84	58	214	403	248	0.124409	0.497144	0.399714	179556	226472	149808	1.41E-09	2335320897	up
	AF111167.2	ENSG00000259319	23	40	43	126	150	131	0.162234	0.298646	0.361311	0.905336	0.794709	130303	1.41E-07	1844400557	up
	UVRAG	ENSG00000198382	882	1936	1595	3025	3973	3372	723867	13028	118493	230035	237769	25265	1.40E-06	1150015906	up
	SYN1	ENSG00000008056	47	73	38	179	187	142	0.783494	0.846298	0.770318	271423	244478	180546	1.40E-06	1596329466	up
	ZNF253	ENSG00000256771	540	846	610	1399	2236	1923	786434	820386	812555	154112	217304	209072	1.39E-11	137387277	up
	RND1	ENSG00000172602	349	881	495	1816	1991	1241	531705	102605	694188	237402	213588	167489	1.37E-07	1480437585	up
	AC107959.3	ENSG00000253616	57	196	140	461	597	362	228968	508975	523674	120178	148915	102296	1.37E-07	1777174926	up
	LINC02019	ENSG00000273356	9	17	17	66	69	62	0.333667	0.635474	0.580796	194734	159434	179687	1.37E-05	2106590499	up
	DLX2	ENSG00000115844	69	211	193	596	1031	759	0.888109	199223	21415	57017	807743	697307	1.36E-12	2241550248	up
	AC022415.1	ENSG00000242615	85	165	116	344	325	299	877663	118277	953962	330684	218715	193007	1.36E-06	1330920283	up
	LINC00888	ENSG00000240024	427	922	654	1408	1809	1415	942251	147238	125852	250581	268018	244942	1.36E-06	1127112903	up
	MIR7-3HG	ENSG00000176840	0	6	5	80	63	32	0	0.350192	0.240463	287583	199283	119237	1.35E-07	3927214914	up
	FGF19	ENSG00000162344	2	7	7	110	138	116	0.0369454	0.0730539	0.0858675	115389	123006	124367	1.33E-17	4410372304	up
	HSPA14	ENSG00000284024	1532	2023	1786	4108	4631	4268	124275	125178	12464	202817	21896	243597	1.33E-12	1186754772	up
	ZC3H6	ENSG00000188177	603	665	717	1475	1902	2031	333247	246138	344792	56057	662237	958792	1.32E-10	133688481	up
	GADD45G	ENSG00000130222	162	330	236	683	1335	486	418292	666763	537913	162586	235974	111466	1.31E-07	1652763587	up
	FKBP9P1	ENSG00000176826	234	512	513	905	1395	1039	239768	342789	436165	840275	95691	82127	1.31E-06	1308022523	up
	RSRC2	ENSG00000111011	7030	10276	10364	22903	24903	23713	897748	109584	126365	266988	242815	265579	1.30E-11	1278450359	up
	RAB39B	ENSG00000155961	571	900	648	1613	1770	1714	42125	51745	438669	102176	918035	106534	1.30E-09	118236289	up
	FEM1A	ENSG00000141965	110	178	174	290	427	355	0.92111	131916	115594	149839	210446	190052	1.30E-05	110892274	up
	NPPB	ENSG00000120937	7	54	23	112	264	161	0.240837	131423	0.818111	34283	577468	486939	1.29E-07	2598032931	up
	CFAP43	ENSG00000197748	86	125	146	887	1569	1241	0.462005	0.821812	0.901943	686827	789647	698709	1.28E-42	3250933976	up
	RB1	ENSG00000139687	773	1398	1181	3833	4290	4476	625305	845829	689496	276401	210716	25862	1.27E-18	1831993006	up
	CCDC66	ENSG00000180376	1089	1725	1311	3350	4680	3680	109848	128677	119665	276376	299128	313503	1.27E-15	1404322824	up
	ZFAS1	ENSG00000177410	1749	2839	2306	5300	5272	4072	289908	368272	381632	848174	765805	726235	1.27E-06	1002106299	up
	CASC15	ENSG00000272168	107	117	177	316	352	372	109316	0.874613	160608	303177	28116	367244	1.27E-05	1268374778	up
	POPDC2	ENSG00000121577	31	44	36	89	150	114	0.739458	0.670881	0.500077	165631	194241	197359	1.26E-05	1552316476	up
	NFKB2	ENSG00000077150	5654	10712	8460	22169	21461	18211	451882	662912	651754	146521	119447	122416	1.25E-08	1243454444	up
	CASP5	ENSG00000137757	10	5	9	57	85	55	0.33763	0.267368	0.202572	0.495571	122004	0.681267	1.25E-07	2892163993	up
	SOX30	ENSG00000039600	62	58	84	168	247	212	0.632253	0.46633	0.940509	203851	219975	25818	1.25E-06	149236311	up
	DMGDH	ENSG00000132837	59	112	108	814	1083	885	178821	201348	11395	115507	140847	112852	1.24E-44	3219891691	up
	KLF15	ENSG00000163884	307	427	413	1491	1943	1689	321803	417413	39902	134509	142839	145472	1.24E-29	2054631971	up
	TBX19	ENSG00000143178	125	165	175	453	597	451	123303	146325	17022	394338	390523	406316	1.24E-12	1578189331	up
	GFRA1	ENSG00000151892	46	91	48	214	191	147	0.288565	0.33827	0.163586	120574	0.923337	0.771598	1.24E-05	1507270978	up
	OVGP1	ENSG00000085465	230	360	321	1047	1391	1224	244564	319006	321144	104628	131609	129017	1.23E-22	190803228	up
	CPNE4	ENSG00000196353	70	121	84	331	429	397	112925	0.896908	0.621223	355972	382945	40482	1.23E-15	1981649491	up
	RAB9A	ENSG00000123595	2292	3740	3796	7230	8792	7402	457132	611005	718168	137099	141778	141797	1.23E-08	1157506949	up
	STMN4	ENSG00000015592	14	23	12	66	91	59	0.272651	0.409477	0.220589	135754	130083	116742	1.23E-05	2034773083	up
	SIX4	ENSG00000100625	594	1145	822	1387	2220	1874	630686	916983	824145	784461	139628	134502	1.23E-05	1003457231	up
	LRRC39	ENSG00000122477	33	66	69	164	335	244	0.519225	0.699961	0.909515	26345	410388	382414	1.22E-09	2026813927	up
	PEX5L	ENSG00000114757	90	97	76	229	270	253	0.361054	0.351057	0.604931	0.825078	151483	130645	1.22E-07	1408553917	up
	HIST1H2BN	ENSG00000233822	241	500	344	704	1176	676	599185	834205	654608	144625	199807	136892	1.21E-05	1130318302	up
	AL136126.1	ENSG00000241255	4	15	6	152	132	61	0.724448	110408	0.500553	121315	747954	406583	1.20E-11	3718145195	up
	SHMT2	ENSG00000182199	10777	14552	11231	30728	28806	22189	142446	154888	144039	349668	324742	278152	1.20E-07	1070374174	up
	RRNAD1	ENSG00000143303	1090	1622	1410	3468	3376	2551	199345	212725	219569	514883	426599	385545	1.20E-07	1099061037	up
	XBP1	ENSG00000100219	3121	5582	5182	26676	28403	25092	42443	623535	613234	328444	310.28	302942	1.19E-33	2447142257	up
	ZNF571	ENSG00000180479	250	335	310	668	995	702	503481	492937	390486	803163	990093	848746	1.19E-10	1284096165	up
	KATNAL2	ENSG00000167216	809	904	952	1871	2274	2074	178104	132875	163996	29447	296507	317682	1.19E-09	1111729189	up
	AFTPH	ENSG00000119844	1395	2707	2329	3654	6719	5196	108216	175211	168993	310321	402092	372341	1.19E-06	1169680881	up
[truncated: 974 more rows]
